# Supplementary material for: Pathogenic shifts in endogenous microbiota impede tissue regeneration via distinct activation of TAK1/MKK/p38
Source: eLife. 2016 Jul 21;5:e16793. doi: 10.7554/eLife.16793 (PMC4993586; doi:10.7554/eLife.16793)
Supplement: Figure 1—source data 1. — DOI: http://dx.doi.org/10.7554/eLife.16793.004 [file elife-16793-fig1-data1.xls]

## Sheet: Figure 1-source data 1A
Index
Sequencing Run	Pool #	Experiment Name	# of Amplification Cycles	Table	SampleNumber	SampleName	Factor 1 Name	Factor 1 Value	Factor 2 Name	Factor 2 Value	Factor 3 Name	Factor 3 Value	Factor 4 Name	Factor 4 Value
MOLNG-1193	1	Recirculation to Static Timecourse	35	B	1	A1	Source	CIW4 Planaria	Day	zero	Antibiotic	None	Site	Lab
MOLNG-1193	1	Recirculation to Static Timecourse	35	B	2	A2	Source	CIW4 Planaria	Day	1	Antibiotic	None	Site	Lab
MOLNG-1193	1	Recirculation to Static Timecourse	35	B	3	A3	Source	CIW4 Planaria	Day	1	Antibiotic	Gentamycin	Site	Lab
MOLNG-1193	1	Recirculation to Static Timecourse	35	B	4	A4	Source	CIW4 Planaria	Day	3	Antibiotic	None	Site	Lab
MOLNG-1193	1	Recirculation to Static Timecourse	35	B	5	A5	Source	CIW4 Planaria	Day	3	Antibiotic	Gentamycin	Site	Lab
MOLNG-1193	1	Recirculation to Static Timecourse	35	B	6	A6	Source	Beef Liver	Day	N/A	Antibiotic	N/A	Site	Lab
MOLNG-1193	1	Recirculation to Static Timecourse	35	B	7	B1	Source	CIW4 Planaria	Day	zero	Antibiotic	None	Site	Lab
MOLNG-1193	1	Recirculation to Static Timecourse	35	B	8	B2	Source	CIW4 Planaria	Day	1	Antibiotic	None	Site	Lab
MOLNG-1193	1	Recirculation to Static Timecourse	35	B	9	B3	Source	CIW4 Planaria	Day	1	Antibiotic	Gentamycin	Site	Lab
MOLNG-1193	1	Recirculation to Static Timecourse	35	B	10	B4	Source	CIW4 Planaria	Day	3	Antibiotic	None	Site	Lab
MOLNG-1193	1	Recirculation to Static Timecourse	35	B	11	B5	Source	CIW4 Planaria	Day	3	Antibiotic	Gentamycin	Site	Lab
MOLNG-1193	1	Recirculation to Static Timecourse	35	B	12	B6	Source	Beef Liver	Day	N/A	Antibiotic	N/A	Site	Lab
MOLNG-1193	1	Recirculation to Static Timecourse	35	B	13	C1	Source	CIW4 Planaria	Day	zero	Antibiotic	None	Site	Lab
MOLNG-1193	1	Recirculation to Static Timecourse	35	B	14	C4	Source	CIW4 Planaria	Day	3	Antibiotic	None	Site	Lab
MOLNG-1193	1	Recirculation to Static Timecourse	35	B	15	C5	Source	CIW4 Planaria	Day	3	Antibiotic	Gentamycin	Site	Lab
MOLNG-1193	1	Recirculation to Static Timecourse	35	B	16	C6	Source	Beef Liver	Day	N/A	Antibiotic	N/A	Site	Lab
MOLNG-1193	2	Recirculation to Static Timecourse	35	C	17	X1	Source	CIW4 Planaria	Day	zero	Antibiotic	None	Site	Lab
MOLNG-1193	2	Recirculation to Static Timecourse	35	C	18	X2	Source	CIW4 Planaria	Day	1	Antibiotic	None	Site	Lab
MOLNG-1193	2	Recirculation to Static Timecourse	35	C	19	X3	Source	CIW4 Planaria	Day	1	Antibiotic	Gentamycin	Site	Lab
MOLNG-1193	2	Recirculation to Static Timecourse	35	C	20	X4	Source	CIW4 Planaria	Day	3	Antibiotic	None	Site	Lab
MOLNG-1193	2	Recirculation to Static Timecourse	35	C	21	X5	Source	CIW4 Planaria	Day	3	Antibiotic	Gentamycin	Site	Lab
MOLNG-1193	2	Recirculation to Static Timecourse	35	C	22	X6	Source	Beef Liver	Day	N/A	Antibiotic	N/A	Site	Lab
MOLNG-1193	2	Recirculation to Static Timecourse	35	C	23	Y1	Source	CIW4 Planaria	Day	zero	Antibiotic	None	Site	Lab
MOLNG-1193	2	Recirculation to Static Timecourse	35	C	24	Y2	Source	CIW4 Planaria	Day	1	Antibiotic	None	Site	Lab
MOLNG-1193	2	Recirculation to Static Timecourse	35	C	25	Y3	Source	CIW4 Planaria	Day	1	Antibiotic	Gentamycin	Site	Lab
MOLNG-1193	2	Recirculation to Static Timecourse	35	C	26	Y4	Source	CIW4 Planaria	Day	3	Antibiotic	None	Site	Lab
MOLNG-1193	2	Recirculation to Static Timecourse	35	C	27	Y5	Source	CIW4 Planaria	Day	3	Antibiotic	Gentamycin	Site	Lab
MOLNG-1193	2	Recirculation to Static Timecourse	35	C	28	Y6	Source	Beef Liver	Day	N/A	Antibiotic	N/A	Site	Lab
MOLNG-1193	2	Recirculation to Static Timecourse	35	C	29	Z1	Source	CIW4 Planaria	Day	zero	Antibiotic	None	Site	Lab
MOLNG-1193	2	Recirculation to Static Timecourse	35	C	30	Z2	Source	CIW4 Planaria	Day	1	Antibiotic	None	Site	Lab
MOLNG-1193	2	Recirculation to Static Timecourse	35	C	31	Z3	Source	CIW4 Planaria	Day	1	Antibiotic	Gentamycin	Site	Lab
MOLNG-1193	2	Recirculation to Static Timecourse	35	C	32	Z4	Source	CIW4 Planaria	Day	3	Antibiotic	None	Site	Lab
MOLNG-1193	2	Recirculation to Static Timecourse	35	C	33	Z5	Source	CIW4 Planaria	Day	3	Antibiotic	Gentamycin	Site	Lab
MOLNG-1193	2	Recirculation to Static Timecourse	35	C	34	Z6	Source	Beef Liver	Day	N/A	Antibiotic	N/A	Site	Lab
MOLNG-1531	1	Sardinia Wild S. mediterranea	25	D	1	A1	Source	Wild Planaria	Day	N/A	Antibiotic	N/A	Site	JJ04-10
MOLNG-1531	1	Sardinia Wild S. mediterranea	25	D	2	A2	Source	Wild Planaria	Day	N/A	Antibiotic	N/A	Site	JJ04-9
MOLNG-1531	1	Sardinia Wild S. mediterranea	25	D	3	A3	Source	Wild Planaria	Day	N/A	Antibiotic	N/A	Site	JJ04-11
MOLNG-1531	1	Sardinia Wild S. mediterranea	25	D	4	A4	Source	Wild Planaria	Day	N/A	Antibiotic	N/A	Site	JJ04-12
MOLNG-1531	1	Sardinia Wild S. mediterranea	25	D	5	A5	Source	Wild Planaria	Day	N/A	Antibiotic	N/A	Site	JJ04-13
MOLNG-1531	1	Sardinia Wild S. mediterranea	25	D	6	B1	Source	Wild Planaria	Day	N/A	Antibiotic	N/A	Site	JJ04-10
MOLNG-1531	1	Sardinia Wild S. mediterranea	25	D	7	B2	Source	Wild Planaria	Day	N/A	Antibiotic	N/A	Site	JJ04-9
MOLNG-1531	1	Sardinia Wild S. mediterranea	25	D	8	B3	Source	Wild Planaria	Day	N/A	Antibiotic	N/A	Site	JJ04-11
MOLNG-1531	1	Sardinia Wild S. mediterranea	25	D	9	B4	Source	Wild Planaria	Day	N/A	Antibiotic	N/A	Site	JJ04-12
MOLNG-1531	1	Sardinia Wild S. mediterranea	25	D	10	B5	Source	Wild Planaria	Day	N/A	Antibiotic	N/A	Site	JJ04-13
MOLNG-1531	1	Sardinia Wild S. mediterranea	25	D	11	C1	Source	Wild Planaria	Day	N/A	Antibiotic	N/A	Site	JJ04-10
MOLNG-1531	1	Sardinia Wild S. mediterranea	25	D	12	C2	Source	Wild Planaria	Day	N/A	Antibiotic	N/A	Site	JJ04-9
MOLNG-1531	1	Sardinia Wild S. mediterranea	25	D	13	C3	Source	Wild Planaria	Day	N/A	Antibiotic	N/A	Site	JJ04-11
MOLNG-1531	1	Sardinia Wild S. mediterranea	25	D	14	C4	Source	Wild Planaria	Day	N/A	Antibiotic	N/A	Site	JJ04-12
MOLNG-1531	1	Sardinia Wild S. mediterranea	25	D	15	C5	Source	Wild Planaria	Day	N/A	Antibiotic	N/A	Site	JJ04-13
MOLNG-1583	1	Regeneration Timecourse	35	E	1	A1	Source	CIW4 Whole worm	Day	zero	Antibiotic	N/A	Site	Lab
MOLNG-1583	1	Regeneration Timecourse	35	E	2	A2	Source	CIW4 Head	Day	zero	Antibiotic	N/A	Site	Lab
MOLNG-1583	1	Regeneration Timecourse	35	E	3	A3	Source	CIW4 Trunk	Day	zero	Antibiotic	N/A	Site	Lab
MOLNG-1583	1	Regeneration Timecourse	35	E	4	A4	Source	CIW4 Tail	Day	zero	Antibiotic	N/A	Site	Lab
MOLNG-1583	1	Regeneration Timecourse	35	E	5	B1	Source	CIW4 Trunk	Day	3	Antibiotic	N/A	Site	Lab
MOLNG-1583	1	Regeneration Timecourse	35	E	6	B2	Source	CIW4 Tail	Day	3	Antibiotic	N/A	Site	Lab
MOLNG-1583	1	Regeneration Timecourse	35	E	7	B3	Source	CIW4 Whole worm	Day	7	Antibiotic	N/A	Site	Lab
MOLNG-1583	1	Regeneration Timecourse	35	E	8	B4	Source	CIW4 Head	Day	7	Antibiotic	N/A	Site	Lab
MOLNG-1583	1	Regeneration Timecourse	35	E	9	C1	Source	CIW4 Whole	Day	14	Antibiotic	N/A	Site	Lab
MOLNG-1583	1	Regeneration Timecourse	35	E	10	C2	Source	CIW4 Head	Day	14	Antibiotic	N/A	Site	Lab
MOLNG-1583	1	Regeneration Timecourse	35	E	11	C3	Source	CIW4 Trunk	Day	14	Antibiotic	N/A	Site	Lab
MOLNG-1583	1	Regeneration Timecourse	35	E	12	C4	Source	CIW4 Tail	Day	14	Antibiotic	N/A	Site	Lab
MOLNG-1583	1	Regeneration Timecourse	35	E	13	A5	Source	CIW4 Whole worm	Day	3	Antibiotic	N/A	Site	Lab
MOLNG-1583	1	Regeneration Timecourse	35	E	14	A6	Source	CIW4 Head	Day	3	Antibiotic	N/A	Site	Lab
MOLNG-1583	1	Regeneration Timecourse	35	E	15	B5	Source	CIW4 Trunk	Day	7	Antibiotic	N/A	Site	Lab
MOLNG-1583	1	Regeneration Timecourse	35	E	16	B6	Source	CIW4 Tail	Day	7	Antibiotic	N/A	Site	Lab
MOLNG-1583	1	Regeneration Timecourse	35	E	17	C5	Source	Non-template Control	Day	n/a	Antibiotic	N/A	Site	N/A
MOLNG-1583	1	Sardinia Wild S. mediterranea	35	E	18	19	Source	Wild Planaria	Day	n/a	Antibiotic	N/A	Site	JJ04-12
MOLNG-1583	1	Sardinia Wild S. mediterranea	35	E	19	21	Source	Wild Planaria	Day	n/a	Antibiotic	N/A	Site	JJ08-1
MOLNG-1583	1	Sardinia Wild S. mediterranea	35	E	20	22	Source	Non-template Control	Day	n/a	Antibiotic	N/A	Site	N/A
MOLNG-1583	1	Recirculation to Static Timecourse	35	E	21	Expt#1 A7	Source	Non-template Control	Day	n/a	Antibiotic	N/A	Site	N/A
MOLNG-1583	1	Recirculation to Static Timecourse	35	E	22	Expt#1 Y7	Source	Non-template Control	Day	n/a	Antibiotic	N/A	Site	N/A
MOLNG-1583	1	Sardinia Wild S. mediterranea	25	E	23	Expt#2 C7	Source	Non-template Control	Day	n/a	Antibiotic	N/A	Site	N/A

## Sheet: Figure 1-source data 1B
SampleNumber	SampleName	Level	Group	Reads	Percentage
1	A1	Kingdom	Unclassified	33828	4.37505
1	A1	Kingdom	Bacteria	739312	95.6169
1	A1	Kingdom	Viruses	62	0.0080186
1	A1	Phylum	Unclassified	35262	4.56052
1	A1	Phylum	Planctomycetes	52736	6.82047
1	A1	Phylum	Bacteroidetes	616544	79.7391
1	A1	Phylum	Proteobacteria	62387	8.06865
1	A1	Phylum	Chloroflexi	622	0.0804447
1	A1	Phylum	Firmicutes	2329	0.301215
1	A1	Phylum	Chlamydiae	2874	0.371701
1	A1	Phylum	Actinobacteria	229	0.0296171
1	A1	Phylum	DNA	62	0.0080186
1	A1	Phylum	Nitrospirae	19	0.00245731
1	A1	Phylum	Acidobacteria	3	0.000387997
1	A1	Phylum	Thermi	7	0.000905326
1	A1	Phylum	Chrysiogenetes	3	0.000387997
1	A1	Phylum	Tenericutes	51	0.00659595
1	A1	Phylum	Spirochaetes	61	0.00788927
1	A1	Phylum	Verrucomicrobia	6	0.000775994
1	A1	Phylum	Deferribacteres	2	0.000258665
1	A1	Phylum	Cyanobacteria	4	0.000517329
1	A1	Phylum	Thermotogae	1	0.000129332
1	A1	Class	Unclassified	36398	4.70744
1	A1	Class	Planctomycetia	52712	6.81736
1	A1	Class	Sphingobacteriia	610193	78.9177
1	A1	Class	Betaproteobacteria	38243	4.94606
1	A1	Class	Alphaproteobacteria	5730	0.741074
1	A1	Class	Gammaproteobacteria	17330	2.24133
1	A1	Class	Ktedonobacteria	607	0.0785047
1	A1	Class	Flavobacteriia	6272	0.811172
1	A1	Class	Bacilli	752	0.0972579
1	A1	Class	Chlamydiia	2874	0.371701
1	A1	Class	Clostridia	1573	0.20344
1	A1	Class	Actinobacteria	228	0.0294878
1	A1	Class	Group II	62	0.0080186
1	A1	Class	Bacteroidia	7	0.000905326
1	A1	Class	Nitrospira	19	0.00245731
1	A1	Class	Acidobacteria	3	0.000387997
1	A1	Class	Deinococci	7	0.000905326
1	A1	Class	Chrysiogenetes	3	0.000387997
1	A1	Class	Mollicutes	51	0.00659595
1	A1	Class	Deltaproteobacteria	23	0.00297464
1	A1	Class	Brocadiae	21	0.00271598
1	A1	Class	Epsilonproteobacteria	10	0.00129332
1	A1	Class	Spirochaetes	61	0.00788927
1	A1	Class	Anaerolineae	13	0.00168132
1	A1	Class	Methylacidiphilae	2	0.000258665
1	A1	Class	Deferribacteres	2	0.000258665
1	A1	Class	Opitutae	4	0.000517329
1	A1	Class	Thermotogae	1	0.000129332
1	A1	Class	Nostocophycideae	1	0.000129332
1	A1	Order	Unclassified	37174	4.8078
1	A1	Order	Gemmatales	45000	5.81995
1	A1	Order	Sphingobacteriales	610193	78.9177
1	A1	Order	Burkholderiales	36995	4.78465
1	A1	Order	Caulobacterales	2184	0.282462
1	A1	Order	Pseudomonadales	12246	1.5838
1	A1	Order	Xanthomonadales	2386	0.308587
1	A1	Order	Pirellulales	7644	0.988616
1	A1	Order	Thermogemmatisporales	607	0.0785047
1	A1	Order	Flavobacteriales	6272	0.811172
1	A1	Order	Bacillales	691	0.0893686
1	A1	Order	Enterobacteriales	2030	0.262545
1	A1	Order	Chlamydiales	2874	0.371701
1	A1	Order	Clostridiales	1347	0.174211
1	A1	Order	Alteromonadales	306	0.0395757
1	A1	Order	Bifidobacteriales	63	0.00814794
1	A1	Order	(Microviridae)	62	0.0080186
1	A1	Order	Rickettsiales	446	0.0576822
1	A1	Order	Sphingomonadales	516	0.0667355
1	A1	Order	Neisseriales	812	0.105018
1	A1	Order	Rhizobiales	2491	0.322167
1	A1	Order	Bacteroidales	7	0.000905326
1	A1	Order	Rhodobacterales	24	0.00310398
1	A1	Order	Nitrospirales	19	0.00245731
1	A1	Order	Chromatiales	5	0.000646662
1	A1	Order	Acidobacteriales	3	0.000387997
1	A1	Order	Actinomycetales	165	0.0213398
1	A1	Order	Deinococcales	6	0.000775994
1	A1	Order	Thermoanaerobacterales	29	0.00375064
1	A1	Order	Thiotrichales	195	0.0252198
1	A1	Order	Chrysiogenales	3	0.000387997
1	A1	Order	Mycoplasmatales	9	0.00116399
1	A1	Order	Syntrophobacterales	11	0.00142266
1	A1	Order	Methylophilales	2	0.000258665
1	A1	Order	Planctomycetales	50	0.00646662
1	A1	Order	Brocadiales	21	0.00271598
1	A1	Order	Thermicanales	3	0.000387997
1	A1	Order	Campylobacterales	10	0.00129332
1	A1	Order	Lactobacillales	57	0.00737194
1	A1	Order	Rhodospirillales	44	0.00569062
1	A1	Order	Oceanospirillales	33	0.00426797
1	A1	Order	Acholeplasmatales	42	0.00543196
1	A1	Order	Aeromonadales	12	0.00155199
1	A1	Order	Spirochaetales	61	0.00788927
1	A1	Order	Hydrogenophilales	1	0.000129332
1	A1	Order	Thermales	1	0.000129332
1	A1	Order	Myxococcales	3	0.000387997
1	A1	Order	Anaerolineales	12	0.00155199
1	A1	Order	Bdellovibrionales	1	0.000129332
1	A1	Order	Legionellales	11	0.00142266
1	A1	Order	Methylacidiphilales	2	0.000258665
1	A1	Order	Deferribacterales	2	0.000258665
1	A1	Order	Desulfovibrionales	6	0.000775994
1	A1	Order	Thiohalorhabdales	1	0.000129332
1	A1	Order	Rhodocyclales	7	0.000905326
1	A1	Order	Caldilineales	1	0.000129332
1	A1	Order	Thermotogales	1	0.000129332
1	A1	Order	Nostocales	1	0.000129332
1	A1	Order	Pasteurellales	1	0.000129332
1	A1	Order	Pelagicoccales	1	0.000129332
1	A1	Family	Unclassified	51912	6.7139
1	A1	Family	Gemmataceae	44863	5.80224
1	A1	Family	Chitinophagaceae	58553	7.5728
1	A1	Family	Amoebophilaceae	534210	69.0906
1	A1	Family	Comamonadaceae	34062	4.40532
1	A1	Family	Caulobacteraceae	2184	0.282462
1	A1	Family	Pseudomonadaceae	12240	1.58303
1	A1	Family	Sphingobacteriaceae	2841	0.367433
1	A1	Family	Xanthomonadaceae	2384	0.308328
1	A1	Family	Pirellulaceae	7644	0.988616
1	A1	Family	Thermogemmatisporaceae	607	0.0785047
1	A1	Family	Flavobacteriaceae	6272	0.811172
1	A1	Family	Staphylococcaceae	101	0.0130626
1	A1	Family	Enterobacteriaceae	2030	0.262545
1	A1	Family	Parachlamydiaceae	2836	0.366786
1	A1	Family	Veillonellaceae	1301	0.168261
1	A1	Family	Oxalobacteraceae	2619	0.338721
1	A1	Family	Alteromonadaceae	258	0.0333677
1	A1	Family	Bacillaceae	590	0.0763061
1	A1	Family	Bifidobacteriaceae	63	0.00814794
1	A1	Family	Burkholderiaceae	191	0.0247025
1	A1	Family	Microviridae	62	0.0080186
1	A1	Family	Rickettsiaceae	426	0.0550956
1	A1	Family	Sphingomonadaceae	516	0.0667355
1	A1	Family	Neisseriaceae	812	0.105018
1	A1	Family	Rhizobiaceae	1174	0.151836
1	A1	Family	Porphyromonadaceae	7	0.000905326
1	A1	Family	Methylobacteriaceae	30	0.00387997
1	A1	Family	Xanthobacteraceae	425	0.0549662
1	A1	Family	Rhodobacteraceae	21	0.00271598
1	A1	Family	Nitrospiraceae	10	0.00129332
1	A1	Family	Chromatiaceae	3	0.000387997
1	A1	Family	Peptococcaceae	34	0.0043973
1	A1	Family	Acidobacteriaceae	3	0.000387997
1	A1	Family	Microbacteriaceae	146	0.0188825
1	A1	Family	Hyphomicrobiaceae	538	0.0695808
1	A1	Family	Deinococcaceae	6	0.000775994
1	A1	Family	Thermoanaerobacteraceae	24	0.00310398
1	A1	Family	Piscirickettsiaceae	194	0.0250905
1	A1	Family	Chrysiogenaceae	3	0.000387997
1	A1	Family	Phyllobacteriaceae	278	0.0359544
1	A1	Family	Mycoplasmataceae	9	0.00116399
1	A1	Family	Isosphaeraceae	120	0.0155199
1	A1	Family	Shewanellaceae	40	0.00517329
1	A1	Family	Syntrophaceae	10	0.00129332
1	A1	Family	Methylophilaceae	2	0.000258665
1	A1	Family	Planctomycetaceae	50	0.00646662
1	A1	Family	Thermodesulfovibrionaceae	9	0.00116399
1	A1	Family	Brocadiaceae	21	0.00271598
1	A1	Family	Thermicanaceae	3	0.000387997
1	A1	Family	Campylobacteraceae	5	0.000646662
1	A1	Family	Streptococcaceae	48	0.00620795
1	A1	Family	Rhodospirillaceae	41	0.00530263
1	A1	Family	Alcaligenaceae	50	0.00646662
1	A1	Family	Oceanospirillaceae	15	0.00193998
1	A1	Family	Acholeplasmataceae	42	0.00543196
1	A1	Family	Pseudoalteromonadaceae	6	0.000775994
1	A1	Family	Flexibacteraceae	25	0.00323331
1	A1	Family	Caldicellulosiruptoraceae	5	0.000646662
1	A1	Family	Helicobacteraceae	5	0.000646662
1	A1	Family	Aeromonadaceae	12	0.00155199
1	A1	Family	Anaplasmataceae	18	0.00232798
1	A1	Family	Idiomarinaceae	1	0.000129332
1	A1	Family	Waddliaceae	5	0.000646662
1	A1	Family	Ectothiorhodospiraceae	1	0.000129332
1	A1	Family	Spirochaetaceae	61	0.00788927
1	A1	Family	Saprospiraceae	18	0.00232798
1	A1	Family	Hydrogenophilaceae	1	0.000129332
1	A1	Family	Thermaceae	1	0.000129332
1	A1	Family	Nannocystaceae	3	0.000387997
1	A1	Family	Anaerolinaceae	12	0.00155199
1	A1	Family	Bradyrhizobiaceae	3	0.000387997
1	A1	Family	Litoricolaceae	14	0.00181065
1	A1	Family	Nocardiaceae	3	0.000387997
1	A1	Family	Bdellovibrionaceae	1	0.000129332
1	A1	Family	Legionellaceae	6	0.000775994
1	A1	Family	Methylacidiphilaceae	2	0.000258665
1	A1	Family	Streptomycetaceae	4	0.000517329
1	A1	Family	Deferribacteraceae	2	0.000258665
1	A1	Family	Hyphomonadaceae	3	0.000387997
1	A1	Family	Moraxellaceae	4	0.000517329
1	A1	Family	Halomonadaceae	3	0.000387997
1	A1	Family	Methylocystaceae	2	0.000258665
1	A1	Family	Desulfovibrionaceae	3	0.000387997
1	A1	Family	Sinobacteraceae	2	0.000258665
1	A1	Family	Thiohalorhabdaceae	1	0.000129332
1	A1	Family	Clostridiaceae	3	0.000387997
1	A1	Family	Rhodocyclaceae	7	0.000905326
1	A1	Family	Desulfonatronumaceae	3	0.000387997
1	A1	Family	Acetobacteraceae	2	0.000258665
1	A1	Family	Caldilineaceae	1	0.000129332
1	A1	Family	Actinopolysporaceae	1	0.000129332
1	A1	Family	Peptostreptococcaceae	1	0.000129332
1	A1	Family	Francisellaceae	5	0.000646662
1	A1	Family	Thermotogaceae	1	0.000129332
1	A1	Family	Nostocaceae	1	0.000129332
1	A1	Family	Lachnospiraceae	2	0.000258665
1	A1	Family	Aurantimonadaceae	1	0.000129332
1	A1	Family	Propionibacteriaceae	1	0.000129332
1	A1	Family	Psychromonadaceae	1	0.000129332
1	A1	Family	Syntrophobacteraceae	1	0.000129332
1	A1	Family	Enterococcaceae	1	0.000129332
1	A1	Family	Pasteurellaceae	1	0.000129332
1	A1	Family	Rhabdochlamydiaceae	2	0.000258665
1	A1	Family	Pelagicoccaceae	1	0.000129332
1	A1	Family	Thiotrichaceae	1	0.000129332
1	A1	Genus	Unclassified	80705	10.4378
1	A1	Genus	Gemmata	44863	5.80224
1	A1	Genus	Segetibacter	41256	5.33573
1	A1	Genus	Candidatus Amoebophilus	534210	69.0906
1	A1	Genus	Arthrospira	1548	0.200206
1	A1	Genus	Pseudomonas	12240	1.58303
1	A1	Genus	Pedobacter	2407	0.311303
1	A1	Genus	Chitinophaga	12429	1.60747
1	A1	Genus	Sphingobacterium	358	0.046301
1	A1	Genus	Pirellula	7644	0.988616
1	A1	Genus	Thermogemmatispora	607	0.0785047
1	A1	Genus	Stenotrophomonas	2348	0.303672
1	A1	Genus	Macrococcus	91	0.0117692
1	A1	Genus	Comamonas	193	0.0249611
1	A1	Genus	Brevundimonas	152	0.0196585
1	A1	Genus	Acidovorax	730	0.0944126
1	A1	Genus	Enterobacter	1887	0.24405
1	A1	Genus	Rhodoferax	4874	0.630366
1	A1	Genus	Paucibacter	206	0.0266425
1	A1	Genus	Elizabethkingia	4518	0.584323
1	A1	Genus	Flavisolibacter	854	0.11045
1	A1	Genus	Candidatus Protochlamydia	2836	0.366786
1	A1	Genus	Delftia	1933	0.249999
1	A1	Genus	Megasphaera	1124	0.14537
1	A1	Genus	Giesbergeria	1592	0.205897
1	A1	Genus	Myroides	186	0.0240558
1	A1	Genus	Flavobacterium	786	0.101655
1	A1	Genus	Oxalobacter	2502	0.323589
1	A1	Genus	Marinobacter	256	0.0331091
1	A1	Genus	Arsenophonus	1	0.000129332
1	A1	Genus	Chryseobacterium	319	0.041257
1	A1	Genus	Geobacillus	590	0.0763061
1	A1	Genus	Curvibacter	89	0.0115106
1	A1	Genus	Bifidobacterium	63	0.00814794
1	A1	Genus	Burkholderia	186	0.0240558
1	A1	Genus	Microvirus	62	0.0080186
1	A1	Genus	Rickettsia	426	0.0550956
1	A1	Genus	Limnohabitans	461	0.0596222
1	A1	Genus	Sphingomonas	494	0.0638902
1	A1	Genus	Chromobacterium	565	0.0730728
1	A1	Genus	Erwinia	3	0.000387997
1	A1	Genus	Pectinatus	177	0.0228918
1	A1	Genus	Shinella	36	0.00465596
1	A1	Genus	Agrobacterium	1098	0.142007
1	A1	Genus	Porphyromonas	7	0.000905326
1	A1	Genus	Methylobacterium	30	0.00387997
1	A1	Genus	Ancylobacter	408	0.0527676
1	A1	Genus	Rhodobacter	20	0.00258665
1	A1	Genus	Nitrospira	10	0.00129332
1	A1	Genus	Thiocapsa	1	0.000129332
1	A1	Genus	Pelotomaculum	33	0.00426797
1	A1	Genus	Granulicella	1	0.000129332
1	A1	Genus	Microbacterium	142	0.0183652
1	A1	Genus	Leptothrix	19	0.00245731
1	A1	Genus	Hyphomicrobium	533	0.0689341
1	A1	Genus	Tepidimonas	3	0.000387997
1	A1	Genus	Deinococcus	6	0.000775994
1	A1	Genus	Janthinobacterium	65	0.0084066
1	A1	Genus	Thermoanaerobacter	22	0.00284531
1	A1	Genus	Hydrogenophaga	286	0.036989
1	A1	Genus	Methylophaga	193	0.0249611
1	A1	Genus	Xanthomonas	9	0.00116399
1	A1	Genus	Desulfurispirillum	3	0.000387997
1	A1	Genus	Chelativorans	208	0.0269011
1	A1	Genus	Mycoplasma	9	0.00116399
1	A1	Genus	Phyllobacterium	50	0.00646662
1	A1	Genus	Olivibacter	47	0.00607862
1	A1	Genus	Singulisphaera	114	0.0147439
1	A1	Genus	Shewanella	40	0.00517329
1	A1	Genus	Luteimonas	5	0.000646662
1	A1	Genus	Vogesella	25	0.00323331
1	A1	Genus	Desulfomonile	10	0.00129332
1	A1	Genus	Candidatus Liberibacter	10	0.00129332
1	A1	Genus	Methylobacillus	2	0.000258665
1	A1	Genus	Planctomyces	50	0.00646662
1	A1	Genus	Aquitalea	196	0.0253491
1	A1	Genus	Thermodesulfovibrio	9	0.00116399
1	A1	Genus	Candidatus Scalindua	21	0.00271598
1	A1	Genus	Thermicanus	3	0.000387997
1	A1	Genus	Rhizobium	12	0.00155199
1	A1	Genus	Sulfurospirillum	1	0.000129332
1	A1	Genus	Campylobacter	4	0.000517329
1	A1	Genus	Lactococcus	48	0.00620795
1	A1	Genus	Rhodospirillum	25	0.00323331
1	A1	Genus	Achromobacter	36	0.00465596
1	A1	Genus	Phenylobacterium	12	0.00155199
1	A1	Genus	Oligella	2	0.000258665
1	A1	Genus	Tenacibaculum	9	0.00116399
1	A1	Genus	Marinospirillum	3	0.000387997
1	A1	Genus	Candidatus Phytoplasma	41	0.00530263
1	A1	Genus	Pseudoalteromonas	6	0.000775994
1	A1	Genus	Runella	16	0.00206932
1	A1	Genus	Thiomonas	16	0.00206932
1	A1	Genus	Variovorax	29	0.00375064
1	A1	Genus	Caldicellulosiruptor	5	0.000646662
1	A1	Genus	Azorhizobium	7	0.000905326
1	A1	Genus	Mesorhizobium	15	0.00193998
1	A1	Genus	Helicobacter	5	0.000646662
1	A1	Genus	Tolumonas	12	0.00155199
1	A1	Genus	Aminobacter	3	0.000387997
1	A1	Genus	Neorickettsia	14	0.00181065
1	A1	Genus	Roseospira	4	0.000517329
1	A1	Genus	Niastella	25	0.00323331
1	A1	Genus	Pseudidiomarina	1	0.000129332
1	A1	Genus	Polaromonas	11	0.00142266
1	A1	Genus	Polynucleobacter	10	0.00129332
1	A1	Genus	Sphingobium	8	0.00103466
1	A1	Genus	Waddlia	5	0.000646662
1	A1	Genus	Leucobacter	2	0.000258665
1	A1	Genus	Luteibacter	1	0.000129332
1	A1	Genus	Thiorhodospira	1	0.000129332
1	A1	Genus	Treponema	61	0.00788927
1	A1	Genus	Polaribacter	6	0.000775994
1	A1	Genus	Klebsiella	2	0.000258665
1	A1	Genus	Lewinella	18	0.00232798
1	A1	Genus	Thiobacillus	1	0.000129332
1	A1	Genus	Thermus	1	0.000129332
1	A1	Genus	Lautropia	4	0.000517329
1	A1	Genus	Phaeobacter	1	0.000129332
1	A1	Genus	Nannocystis	3	0.000387997
1	A1	Genus	Bellilinea	12	0.00155199
1	A1	Genus	Bradyrhizobium	3	0.000387997
1	A1	Genus	Litoricola	14	0.00181065
1	A1	Genus	Rhodococcus	3	0.000387997
1	A1	Genus	Caulobacter	2	0.000258665
1	A1	Genus	Bdellovibrio	1	0.000129332
1	A1	Genus	Escherichia	3	0.000387997
1	A1	Genus	Azospirillum	7	0.000905326
1	A1	Genus	Salinimicrobium	1	0.000129332
1	A1	Genus	Dokdonella	2	0.000258665
1	A1	Genus	Isosphaera	6	0.000775994
1	A1	Genus	Asticcacaulis	1	0.000129332
1	A1	Genus	Candidatus Blochmannia	9	0.00116399
1	A1	Genus	Methylibium	14	0.00181065
1	A1	Genus	Gillisia	1	0.000129332
1	A1	Genus	Legionella	6	0.000775994
1	A1	Genus	Candidatus Methylacidiphilum	2	0.000258665
1	A1	Genus	Marinomonas	3	0.000387997
1	A1	Genus	Salinicoccus	5	0.000646662
1	A1	Genus	Brenneria	6	0.000775994
1	A1	Genus	Trabulsiella	10	0.00129332
1	A1	Genus	Deferribacter	2	0.000258665
1	A1	Genus	Hyphomonas	2	0.000258665
1	A1	Genus	Psychrobacter	4	0.000517329
1	A1	Genus	Edaphobacter	2	0.000258665
1	A1	Genus	Hymenobacter	5	0.000646662
1	A1	Genus	Xanthobacter	3	0.000387997
1	A1	Genus	Ehrlichia	4	0.000517329
1	A1	Genus	Streptomyces	3	0.000387997
1	A1	Genus	Methylosinus	2	0.000258665
1	A1	Genus	Niabella	16	0.00206932
1	A1	Genus	Desulfovibrio	3	0.000387997
1	A1	Genus	Stenoxybacter	2	0.000258665
1	A1	Genus	Hydrocarboniphaga	2	0.000258665
1	A1	Genus	Maricaulis	1	0.000129332
1	A1	Genus	Thiohalorhabdus	1	0.000129332
1	A1	Genus	Alkaliphilus	2	0.000258665
1	A1	Genus	Lysobacter	1	0.000129332
1	A1	Genus	Herbaspirillum	4	0.000517329
1	A1	Genus	Denitratisoma	4	0.000517329
1	A1	Genus	Desulfonatronum	3	0.000387997
1	A1	Genus	Candidatus Endobugula	1	0.000129332
1	A1	Genus	Roseomonas	2	0.000258665
1	A1	Genus	Caldilinea	1	0.000129332
1	A1	Genus	Actinopolyspora	1	0.000129332
1	A1	Genus	Acholeplasma	1	0.000129332
1	A1	Genus	Zobellia	1	0.000129332
1	A1	Genus	Dechloromonas	1	0.000129332
1	A1	Genus	Clostridium	2	0.000258665
1	A1	Genus	Francisella	5	0.000646662
1	A1	Genus	Emticicia	2	0.000258665
1	A1	Genus	Halomonas	2	0.000258665
1	A1	Genus	Candidatus Phlomobacter	2	0.000258665
1	A1	Genus	Thauera	1	0.000129332
1	A1	Genus	Serratia	1	0.000129332
1	A1	Genus	Thermosipho	1	0.000129332
1	A1	Genus	Agromyces	1	0.000129332
1	A1	Genus	Desulfotomaculum	1	0.000129332
1	A1	Genus	Lachnospira	1	0.000129332
1	A1	Genus	Aurantimonas	1	0.000129332
1	A1	Genus	Propionibacterium	1	0.000129332
1	A1	Genus	Cycloclasticus	1	0.000129332
1	A1	Genus	Psychromonas	1	0.000129332
1	A1	Genus	Nitrincola	1	0.000129332
1	A1	Genus	Tetragenococcus	1	0.000129332
1	A1	Genus	Limnobacter	1	0.000129332
1	A1	Genus	Candidatus Rhabdochlamydia	2	0.000258665
1	A1	Genus	Sphingopyxis	1	0.000129332
1	A1	Genus	Cellvibrio	1	0.000129332
1	A1	Genus	Tepidanaerobacter	1	0.000129332
1	A1	Genus	Propionivibrio	1	0.000129332
1	A1	Genus	Psychroflexus	1	0.000129332
1	A1	Genus	Pelagicoccus	1	0.000129332
1	A1	Genus	Bergeyella	1	0.000129332
1	A1	Genus	Thiothrix	1	0.000129332
1	A1	Species	Unclassified	140419	18.1607
1	A1	Species	Segetibacter aerophilus	41256	5.33573
1	A1	Species	Candidatus Amoebophilus asiaticus	534210	69.0906
1	A1	Species	Arthrospira fusiformis	931	0.120408
1	A1	Species	Pseudomonas brenneri	8421	1.08911
1	A1	Species	Chitinophaga soli	12429	1.60747
1	A1	Species	Sphingobacterium shayense	358	0.046301
1	A1	Species	Pirellula staleyi	7580	0.980339
1	A1	Species	Stenotrophomonas geniculata	1731	0.223874
1	A1	Species	Comamonas nitrativorans	45	0.00581995
1	A1	Species	Brevundimonas staleyi	114	0.0147439
1	A1	Species	Acidovorax wohlfahrtii	708	0.0915673
1	A1	Species	Enterobacter hormaechei	820	0.106052
1	A1	Species	Rhodoferax antarcticus	2307	0.29837
1	A1	Species	Enterobacter amnigenus	942	0.121831
1	A1	Species	Elizabethkingia meningoseptica	4503	0.582383
1	A1	Species	Flavisolibacter ginsengisoli	854	0.11045
1	A1	Species	Candidatus Protochlamydia amoebophila	2820	0.364717
1	A1	Species	Delftia lacustris	1817	0.234997
1	A1	Species	Pseudomonas proteolytica	26	0.00336264
1	A1	Species	Pseudomonas tremae	138	0.0178479
1	A1	Species	Pseudomonas marginalis	877	0.113424
1	A1	Species	Megasphaera hominis	1124	0.14537
1	A1	Species	Myroides odoratus	147	0.0190119
1	A1	Species	Flavobacterium swingsii	718	0.0928606
1	A1	Species	Oxalobacter vibrioformis	2502	0.323589
1	A1	Species	Marinobacter arcticus	252	0.0325917
1	A1	Species	Stenotrophomonas pavanii	179	0.0231505
1	A1	Species	Rhodoferax ferrireducens	156	0.0201758
1	A1	Species	Comamonas kerstersii	66	0.00853593
1	A1	Species	Stenotrophomonas koreensis	5	0.000646662
1	A1	Species	Pseudomonas moraviensis	190	0.0245731
1	A1	Species	Curvibacter gracilis	89	0.0115106
1	A1	Species	Pseudomonas veronii	421	0.0544489
1	A1	Species	Bifidobacterium bombi	63	0.00814794
1	A1	Species	Burkholderia bryophila	143	0.0184945
1	A1	Species	Microvirus Enterobacteria phage PhiX174	62	0.0080186
1	A1	Species	Sphingomonas yabuuchiae	343	0.044361
1	A1	Species	Erwinia papayae	1	0.000129332
1	A1	Species	Pectinatus cerevisiiphilus	177	0.0228918
1	A1	Species	Pseudomonas collierea	173	0.0223745
1	A1	Species	Shinella yambaruensis	34	0.0043973
1	A1	Species	Agrobacterium tumefaciens	650	0.084066
1	A1	Species	Porphyromonas canis	7	0.000905326
1	A1	Species	Pedobacter africanus	7	0.000905326
1	A1	Species	Pseudomonas alkylphenolia	1	0.000129332
1	A1	Species	Pelotomaculum isophthalicicum	33	0.00426797
1	A1	Species	Granulicella tundricola	1	0.000129332
1	A1	Species	Microbacterium chocolatum	74	0.00957059
1	A1	Species	Rickettsia limoniae	258	0.0333677
1	A1	Species	Pseudomonas syncyanea	17	0.00219865
1	A1	Species	Microbacterium hominis	8	0.00103466
1	A1	Species	Leptothrix discophora	19	0.00245731
1	A1	Species	Hyphomicrobium sulfonivorans	12	0.00155199
1	A1	Species	Tepidimonas thermarum	3	0.000387997
1	A1	Species	Stenotrophomonas maltophilia	9	0.00116399
1	A1	Species	Deinococcus soli	5	0.000646662
1	A1	Species	Janthinobacterium agaricidamnosum	65	0.0084066
1	A1	Species	Thermoanaerobacter inferii	20	0.00258665
1	A1	Species	Pseudomonas parafulva	164	0.0212105
1	A1	Species	Hydrogenophaga defluvii	286	0.036989
1	A1	Species	Xanthomonas oryzae	7	0.000905326
1	A1	Species	Desulfurispirillum alkaliphilum	3	0.000387997
1	A1	Species	Mycoplasma timone	5	0.000646662
1	A1	Species	Chryseobacterium indologenes	105	0.0135799
1	A1	Species	Luteimonas terricola	2	0.000258665
1	A1	Species	Brevundimonas olei	14	0.00181065
1	A1	Species	Burkholderia ubonensis	15	0.00193998
1	A1	Species	Pseudomonas migulae	17	0.00219865
1	A1	Species	Elizabethkingia anophelis	14	0.00181065
1	A1	Species	Vogesella perlucida	22	0.00284531
1	A1	Species	Desulfomonile tiedjei	10	0.00129332
1	A1	Species	Methylobacillus glycogenes	2	0.000258665
1	A1	Species	Planctomyces limnophilus	36	0.00465596
1	A1	Species	Pseudomonas fluorescens	9	0.00116399
1	A1	Species	Delftia acidovorans	10	0.00129332
1	A1	Species	Aquitalea denitrificans	196	0.0253491
1	A1	Species	Thermodesulfovibrio thiophilus	2	0.000258665
1	A1	Species	Candidatus Scalindua brodae	21	0.00271598
1	A1	Species	Myroides injenensis	28	0.00362131
1	A1	Species	Agrobacterium larrymoorei	8	0.00103466
1	A1	Species	Rhizobium alamii	12	0.00155199
1	A1	Species	Rhodobacter apigmentum	2	0.000258665
1	A1	Species	Sphingomonas sanxanigenens	10	0.00129332
1	A1	Species	Pseudomonas teessidea	22	0.00284531
1	A1	Species	Acidovorax anthurii	14	0.00181065
1	A1	Species	Enterobacter soli	25	0.00323331
1	A1	Species	Oligella ureolytica	2	0.000258665
1	A1	Species	Pseudomonas borealis	7	0.000905326
1	A1	Species	Stenotrophomonas retroflexus	43	0.00556129
1	A1	Species	Runella limosa	16	0.00206932
1	A1	Species	Thiomonas perometabolis	14	0.00181065
1	A1	Species	Limnohabitans parvus	2	0.000258665
1	A1	Species	Pseudomonas corrugata	4	0.000517329
1	A1	Species	Stenotrophomonas chelatiphaga	6	0.000775994
1	A1	Species	Agrobacterium viscosum	51	0.00659595
1	A1	Species	Variovorax boronicumulans	24	0.00310398
1	A1	Species	Delftia tsuruhatensis	8	0.00103466
1	A1	Species	Mycoplasma iguanae	3	0.000387997
1	A1	Species	Sphingomonas leidyia	58	0.00750127
1	A1	Species	Mesorhizobium camelthorni	15	0.00193998
1	A1	Species	Tolumonas auensis	12	0.00155199
1	A1	Species	Shewanella pneumatophori	2	0.000258665
1	A1	Species	Aminobacter aminovorans	3	0.000387997
1	A1	Species	Neorickettsia helminthoeca	14	0.00181065
1	A1	Species	Acidovorax facilis	1	0.000129332
1	A1	Species	Flavobacterium soli	8	0.00103466
1	A1	Species	Niastella koreensis	25	0.00323331
1	A1	Species	Burkholderia sediminicola	8	0.00103466
1	A1	Species	Chryseobacterium isbiliense	11	0.00142266
1	A1	Species	Pedobacter daejeonensis	2	0.000258665
1	A1	Species	Acidovorax temperans	3	0.000387997
1	A1	Species	Gemmata obscuriglobus	16	0.00206932
1	A1	Species	Hyphomicrobium aestuarii	30	0.00387997
1	A1	Species	Luteibacter anthropi	1	0.000129332
1	A1	Species	Treponema calligyrum	61	0.00788927
1	A1	Species	Polaribacter butkevichii	6	0.000775994
1	A1	Species	Microbacterium marinilacus	8	0.00103466
1	A1	Species	Pseudomonas gessardii	4	0.000517329
1	A1	Species	Klebsiella granulomatis	2	0.000258665
1	A1	Species	Lewinella marina	6	0.000775994
1	A1	Species	Comamonas composti	11	0.00142266
1	A1	Species	Lautropia mirabilis	4	0.000517329
1	A1	Species	Sphingomonas pseudosanguinis	8	0.00103466
1	A1	Species	Bellilinea caldifistulae	12	0.00155199
1	A1	Species	Pedobacter suwonensis	1	0.000129332
1	A1	Species	Chryseobacterium oranimense	5	0.000646662
1	A1	Species	Rhodococcus qingshengii	3	0.000387997
1	A1	Species	Variovorax dokdonensis	4	0.000517329
1	A1	Species	Caulobacter crescentus	1	0.000129332
1	A1	Species	Bdellovibrio exovorus	1	0.000129332
1	A1	Species	Burkholderia phenoliruptrix	2	0.000258665
1	A1	Species	Enterobacter gergoviae	3	0.000387997
1	A1	Species	Escherichia albertii	2	0.000258665
1	A1	Species	Azospirillum rugosum	3	0.000387997
1	A1	Species	Pseudomonas azotoformans	1	0.000129332
1	A1	Species	Salinimicrobium terrae	1	0.000129332
1	A1	Species	Dokdonella fugitiva	2	0.000258665
1	A1	Species	Flavobacterium terrigena	6	0.000775994
1	A1	Species	Isosphaera pallida	6	0.000775994
1	A1	Species	Phenylobacterium lituiforme	2	0.000258665
1	A1	Species	Microbacterium paludicola	9	0.00116399
1	A1	Species	Candidatus Blochmannia castaneus	7	0.000905326
1	A1	Species	Rickettsia aeschlimannii	14	0.00181065
1	A1	Species	Enterobacter cancerogenus	3	0.000387997
1	A1	Species	Stenotrophomonas terrae	2	0.000258665
1	A1	Species	Legionella shakespearei	3	0.000387997
1	A1	Species	Lewinella lutea	5	0.000646662
1	A1	Species	Pseudomonas benzenivorans	1	0.000129332
1	A1	Species	Phyllobacterium myrsinacearum	3	0.000387997
1	A1	Species	Thiomonas thermosulfata	1	0.000129332
1	A1	Species	Achromobacter piechaudii	3	0.000387997
1	A1	Species	Salinicoccus iranensis	5	0.000646662
1	A1	Species	Legionella cherrii	1	0.000129332
1	A1	Species	Agrobacterium undicola	5	0.000646662
1	A1	Species	Trabulsiella odontotermitis	7	0.000905326
1	A1	Species	Microbacterium hydrocarbonoxydans	9	0.00116399
1	A1	Species	Deferribacter autotrophicus	2	0.000258665
1	A1	Species	Edaphobacter modestus	2	0.000258665
1	A1	Species	Pseudomonas mosselii	1	0.000129332
1	A1	Species	Xanthobacter polyaromaticivorans	3	0.000387997
1	A1	Species	Chryseobacterium soli	1	0.000129332
1	A1	Species	Sphingomonas elodea	5	0.000646662
1	A1	Species	Ehrlichia ovina	4	0.000517329
1	A1	Species	Burkholderia terricola	2	0.000258665
1	A1	Species	Streptomyces lazureus	3	0.000387997
1	A1	Species	Caulobacter tundrae	1	0.000129332
1	A1	Species	Acidovorax delafieldii	2	0.000258665
1	A1	Species	Chromobacterium subtsugae	1	0.000129332
1	A1	Species	Microbacterium flavum	1	0.000129332
1	A1	Species	Niabella soli	15	0.00193998
1	A1	Species	Burkholderia phytofirmans	3	0.000387997
1	A1	Species	Helicobacter suncus	1	0.000129332
1	A1	Species	Microbacterium pygmaeum	1	0.000129332
1	A1	Species	Methylobacterium goesingense	4	0.000517329
1	A1	Species	Erwinia tasmaniensis	2	0.000258665
1	A1	Species	Polaromonas naphthalenivorans	1	0.000129332
1	A1	Species	Chryseobacterium joostei	1	0.000129332
1	A1	Species	Polaromonas vacuolata	1	0.000129332
1	A1	Species	Maricaulis indicus	1	0.000129332
1	A1	Species	Thiohalorhabdus denitrificans	1	0.000129332
1	A1	Species	Niabella aurantiaca	1	0.000129332
1	A1	Species	Alkaliphilus crotonatoxidans	2	0.000258665
1	A1	Species	Flavobacterium suncheonense	2	0.000258665
1	A1	Species	Enterobacter nickellidurans	3	0.000387997
1	A1	Species	Marinomonas basaltis	1	0.000129332
1	A1	Species	Lysobacter deserti	1	0.000129332
1	A1	Species	Chryseobacterium culicis	1	0.000129332
1	A1	Species	Pedobacter himalayensis	1	0.000129332
1	A1	Species	Herbaspirillum magnetovibrio	3	0.000387997
1	A1	Species	Giesbergeria voronezhensis	3	0.000387997
1	A1	Species	Denitratisoma oestradiolicum	4	0.000517329
1	A1	Species	Desulfonatronum thiosulfatophilum	3	0.000387997
1	A1	Species	Methylobacterium marchantiae	2	0.000258665
1	A1	Species	Caldilinea tarbellica	1	0.000129332
1	A1	Species	Campylobacter faecalis	1	0.000129332
1	A1	Species	Comamonas koreensis	1	0.000129332
1	A1	Species	Acholeplasma cavigenitalium	1	0.000129332
1	A1	Species	Roseomonas massiliensis	1	0.000129332
1	A1	Species	Pseudomonas panipatensis	1	0.000129332
1	A1	Species	Zobellia laminariae	1	0.000129332
1	A1	Species	Dechloromonas hortensis	1	0.000129332
1	A1	Species	Clostridium thermoalcaliphilum	1	0.000129332
1	A1	Species	Sphingomonas roseiflava	2	0.000258665
1	A1	Species	Francisella hispaniensis	5	0.000646662
1	A1	Species	Chryseobacterium taichungense	2	0.000258665
1	A1	Species	Emticicia oligotrophica	2	0.000258665
1	A1	Species	Halomonas neptunia	2	0.000258665
1	A1	Species	Candidatus Phlomobacter fragariae	2	0.000258665
1	A1	Species	Thauera terpenica	1	0.000129332
1	A1	Species	Sphingobium abikonense	2	0.000258665
1	A1	Species	Olivibacter ginsengisoli	1	0.000129332
1	A1	Species	Serratia entomophila	1	0.000129332
1	A1	Species	Chromobacterium haemolyticum	3	0.000387997
1	A1	Species	Pseudomonas plecoglossicida	1	0.000129332
1	A1	Species	Thermosipho ferriphilus	1	0.000129332
1	A1	Species	Pseudomonas pavonaceae	1	0.000129332
1	A1	Species	Agromyces salentinus	1	0.000129332
1	A1	Species	Pseudomonas coronafaciens	2	0.000258665
1	A1	Species	Desulfotomaculum indicum	1	0.000129332
1	A1	Species	Lachnospira pectinoschiza	1	0.000129332
1	A1	Species	Aurantimonas litoralis	1	0.000129332
1	A1	Species	Agrobacterium rubi	2	0.000258665
1	A1	Species	Brevundimonas terrae	1	0.000129332
1	A1	Species	Sphingomonas sanguinis	2	0.000258665
1	A1	Species	Cycloclasticus oligotrophus	1	0.000129332
1	A1	Species	Sphingomonas oligophenolica	3	0.000387997
1	A1	Species	Pseudomonas caricapapayae	1	0.000129332
1	A1	Species	Pseudomonas poae	1	0.000129332
1	A1	Species	Chryseobacterium formosense	1	0.000129332
1	A1	Species	Desulfovibrio butyratiphilus	1	0.000129332
1	A1	Species	Nitrincola lacisaponensis	1	0.000129332
1	A1	Species	Pseudomonas agarici	1	0.000129332
1	A1	Species	Comamonas odontotermitis	1	0.000129332
1	A1	Species	Tetragenococcus doogicus	1	0.000129332
1	A1	Species	Microbacterium paraoxydans	1	0.000129332
1	A1	Species	Limnobacter litoralis	1	0.000129332
1	A1	Species	Herbaspirillum rubrisubalbicans	1	0.000129332
1	A1	Species	Candidatus Rhabdochlamydia crassificans	2	0.000258665
1	A1	Species	Pseudomonas umsongensis	1	0.000129332
1	A1	Species	Sphingopyxis granuli	1	0.000129332
1	A1	Species	Shinella fusca	2	0.000258665
1	A1	Species	Rhodobacter gluconicum	2	0.000258665
1	A1	Species	Chromobacterium piscinae	1	0.000129332
1	A1	Species	Pedobacter agri	1	0.000129332
1	A1	Species	Cellvibrio ostraviensis	1	0.000129332
1	A1	Species	Pedobacter koreensis	2	0.000258665
1	A1	Species	Achromobacter xylosoxidans	2	0.000258665
1	A1	Species	Achromobacter arsenitoxydans	1	0.000129332
1	A1	Species	Tepidanaerobacter syntrophicus	1	0.000129332
1	A1	Species	Pseudomonas metavorans	1	0.000129332
1	A1	Species	Propionivibrio dicarboxylicus	1	0.000129332
1	A1	Species	Pseudomonas mandelii	1	0.000129332
1	A1	Species	Phyllobacterium bourgognense	1	0.000129332
1	A1	Species	Bergeyella zoohelcum	1	0.000129332
2	A2	Kingdom	Unclassified	15310	2.18011
2	A2	Kingdom	Bacteria	686899	97.8131
2	A2	Kingdom	Viruses	48	0.0068351
2	A2	Phylum	Unclassified	16547	2.35626
2	A2	Phylum	Bacteroidetes	515653	73.428
2	A2	Phylum	Proteobacteria	159968	22.7791
2	A2	Phylum	Planctomycetes	8559	1.21879
2	A2	Phylum	Firmicutes	967	0.137699
2	A2	Phylum	DNA	48	0.0068351
2	A2	Phylum	Chlamydiae	302	0.0430042
2	A2	Phylum	Chloroflexi	48	0.0068351
2	A2	Phylum	Tenericutes	39	0.00555352
2	A2	Phylum	Chlorobi	41	0.00583832
2	A2	Phylum	Actinobacteria	51	0.0072623
2	A2	Phylum	Cyanobacteria	6	0.000854388
2	A2	Phylum	Spirochaetes	13	0.00185117
2	A2	Phylum	Thermi	2	0.000284796
2	A2	Phylum	Deferribacteres	1	0.000142398
2	A2	Phylum	Nitrospirae	3	0.000427194
2	A2	Phylum	Thermotogae	1	0.000142398
2	A2	Phylum	Acidobacteria	1	0.000142398
2	A2	Phylum	Chrysiogenetes	5	0.00071199
2	A2	Phylum	Verrucomicrobia	1	0.000142398
2	A2	Phylum	Fusobacteria	1	0.000142398
2	A2	Class	Unclassified	17116	2.43728
2	A2	Class	Sphingobacteriia	514065	73.2018
2	A2	Class	Betaproteobacteria	153190	21.8139
2	A2	Class	Gammaproteobacteria	4179	0.595081
2	A2	Class	Planctomycetia	8555	1.21822
2	A2	Class	Clostridia	636	0.0905651
2	A2	Class	Epsilonproteobacteria	19	0.00270556
2	A2	Class	Flavobacteriia	1527	0.217442
2	A2	Class	Alphaproteobacteria	2060	0.29334
2	A2	Class	Group II	48	0.0068351
2	A2	Class	Chlamydiia	302	0.0430042
2	A2	Class	Ktedonobacteria	46	0.00655031
2	A2	Class	Mollicutes	39	0.00555352
2	A2	Class	Bacilli	327	0.0465641
2	A2	Class	Chlorobia	41	0.00583832
2	A2	Class	Actinobacteria	51	0.0072623
2	A2	Class	Nostocophycideae	2	0.000284796
2	A2	Class	Spirochaetes	12	0.00170878
2	A2	Class	Deinococci	2	0.000284796
2	A2	Class	Deltaproteobacteria	15	0.00213597
2	A2	Class	Bacteroidia	3	0.000427194
2	A2	Class	Deferribacteres	1	0.000142398
2	A2	Class	Anaerolineae	2	0.000284796
2	A2	Class	Nitrospira	3	0.000427194
2	A2	Class	Oscillatoriophycideae	2	0.000284796
2	A2	Class	Brocadiae	4	0.000569592
2	A2	Class	Thermotogae	1	0.000142398
2	A2	Class	Acidobacteria	1	0.000142398
2	A2	Class	Chrysiogenetes	5	0.00071199
2	A2	Class	Verrucomicrobiae	1	0.000142398
2	A2	Class	Leptospirae	1	0.000142398
2	A2	Class	Fusobacteria	1	0.000142398
2	A2	Order	Unclassified	18111	2.57897
2	A2	Order	Sphingobacteriales	514065	73.2018
2	A2	Order	Burkholderiales	148360	21.1262
2	A2	Order	Alteromonadales	320	0.0455674
2	A2	Order	Neisseriales	3925	0.558912
2	A2	Order	Enterobacteriales	237	0.0337483
2	A2	Order	Gemmatales	7261	1.03395
2	A2	Order	Pseudomonadales	2230	0.317548
2	A2	Order	Clostridiales	623	0.088714
2	A2	Order	Pirellulales	1279	0.182127
2	A2	Order	Campylobacterales	19	0.00270556
2	A2	Order	Flavobacteriales	1527	0.217442
2	A2	Order	Rhizobiales	898	0.127873
2	A2	Order	Caulobacterales	763	0.10865
2	A2	Order	Sphingomonadales	29	0.00412954
2	A2	Order	(Microviridae)	48	0.0068351
2	A2	Order	Rickettsiales	132	0.0187965
2	A2	Order	Thiotrichales	887	0.126307
2	A2	Order	Legionellales	23	0.00327515
2	A2	Order	Chlamydiales	302	0.0430042
2	A2	Order	Thermogemmatisporales	46	0.00655031
2	A2	Order	Acholeplasmatales	33	0.00469913
2	A2	Order	Rhodospirillales	42	0.00598072
2	A2	Order	Bacillales	297	0.0422922
2	A2	Order	Xanthomonadales	220	0.0313276
2	A2	Order	Chlorobiales	41	0.00583832
2	A2	Order	Oceanospirillales	96	0.0136702
2	A2	Order	Rhodobacterales	117	0.0166606
2	A2	Order	Lactobacillales	30	0.00427194
2	A2	Order	Kiloniellales	56	0.00797429
2	A2	Order	Chromatiales	87	0.0123886
2	A2	Order	Rhodocyclales	19	0.00270556
2	A2	Order	Bifidobacteriales	16	0.00227837
2	A2	Order	Nostocales	2	0.000284796
2	A2	Order	Gallionellales	3	0.000427194
2	A2	Order	Actinomycetales	34	0.00484153
2	A2	Order	Borreliales	12	0.00170878
2	A2	Order	Thermales	1	0.000142398
2	A2	Order	Mycoplasmatales	5	0.00071199
2	A2	Order	Syntrophobacterales	8	0.00113918
2	A2	Order	Thermoanaerobacterales	2	0.000284796
2	A2	Order	Bacteroidales	3	0.000427194
2	A2	Order	Desulfuromonadales	1	0.000142398
2	A2	Order	Deferribacterales	1	0.000142398
2	A2	Order	Desulfovibrionales	6	0.000854388
2	A2	Order	Anaerolineales	2	0.000284796
2	A2	Order	Nitrospirales	3	0.000427194
2	A2	Order	Chroococcales	2	0.000284796
2	A2	Order	Planctomycetales	12	0.00170878
2	A2	Order	Aeromonadales	3	0.000427194
2	A2	Order	Brocadiales	4	0.000569592
2	A2	Order	Deinococcales	1	0.000142398
2	A2	Order	Thermotogales	1	0.000142398
2	A2	Order	Acidobacteriales	1	0.000142398
2	A2	Order	Chrysiogenales	5	0.00071199
2	A2	Order	Verrucomicrobiales	1	0.000142398
2	A2	Order	Leptospirales	1	0.000142398
2	A2	Order	Fusobacteriales	1	0.000142398
2	A2	Order	Methylophilales	2	0.000284796
2	A2	Order	Hydrogenophilales	1	0.000142398
2	A2	Family	Unclassified	30062	4.28077
2	A2	Family	Amoebophilaceae	453364	64.5581
2	A2	Family	Chitinophagaceae	46551	6.62877
2	A2	Family	Comamonadaceae	86913	12.3762
2	A2	Family	Oxalobacteraceae	60716	8.64584
2	A2	Family	Shewanellaceae	68	0.00968306
2	A2	Family	Neisseriaceae	3925	0.558912
2	A2	Family	Enterobacteriaceae	237	0.0337483
2	A2	Family	Sphingobacteriaceae	2403	0.342182
2	A2	Family	Gemmataceae	7237	1.03053
2	A2	Family	Pseudomonadaceae	2222	0.316408
2	A2	Family	Veillonellaceae	578	0.0823061
2	A2	Family	Pirellulaceae	1279	0.182127
2	A2	Family	Campylobacteraceae	8	0.00113918
2	A2	Family	Flavobacteriaceae	1527	0.217442
2	A2	Family	Helicobacteraceae	11	0.00156638
2	A2	Family	Alteromonadaceae	246	0.0350299
2	A2	Family	Methylobacteriaceae	223	0.0317548
2	A2	Family	Caulobacteraceae	763	0.10865
2	A2	Family	Sphingomonadaceae	29	0.00412954
2	A2	Family	Xanthobacteraceae	49	0.0069775
2	A2	Family	Hyphomicrobiaceae	448	0.0637943
2	A2	Family	Flammeovirgaceae	24	0.00341755
2	A2	Family	Microviridae	48	0.0068351
2	A2	Family	Rickettsiaceae	123	0.017515
2	A2	Family	Piscirickettsiaceae	883	0.125737
2	A2	Family	Coxiellaceae	5	0.00071199
2	A2	Family	Parachlamydiaceae	295	0.0420074
2	A2	Family	Peptococcaceae	10	0.00142398
2	A2	Family	Thermogemmatisporaceae	46	0.00655031
2	A2	Family	Bartonellaceae	6	0.000854388
2	A2	Family	Acholeplasmataceae	33	0.00469913
2	A2	Family	Rhodospirillaceae	36	0.00512633
2	A2	Family	Alcaligenaceae	327	0.0465641
2	A2	Family	Phyllobacteriaceae	108	0.015379
2	A2	Family	Bacillaceae	254	0.0361691
2	A2	Family	Flexibacteraceae	156	0.0222141
2	A2	Family	Legionellaceae	14	0.00199357
2	A2	Family	Xanthomonadaceae	208	0.0296188
2	A2	Family	Chlorobiaceae	41	0.00583832
2	A2	Family	Aurantimonadaceae	9	0.00128158
2	A2	Family	Litoricolaceae	9	0.00128158
2	A2	Family	Burkholderiaceae	89	0.0126734
2	A2	Family	Francisellaceae	3	0.000427194
2	A2	Family	Rhodobacteraceae	114	0.0162334
2	A2	Family	Isosphaeraceae	22	0.00313276
2	A2	Family	Kiloniellaceae	56	0.00797429
2	A2	Family	Ectothiorhodospiraceae	85	0.0121038
2	A2	Family	Rhodocyclaceae	19	0.00270556
2	A2	Family	Rhizobiaceae	13	0.00185117
2	A2	Family	Methylocystaceae	4	0.000569592
2	A2	Family	Bifidobacteriaceae	16	0.00227837
2	A2	Family	Saprospiraceae	8	0.00113918
2	A2	Family	Acetobacteraceae	5	0.00071199
2	A2	Family	Nostocaceae	2	0.000284796
2	A2	Family	Gallionellaceae	3	0.000427194
2	A2	Family	Oceanospirillaceae	48	0.0068351
2	A2	Family	Borreliaceae	12	0.00170878
2	A2	Family	Moraxellaceae	5	0.00071199
2	A2	Family	Halomonadaceae	38	0.00541112
2	A2	Family	Pseudoalteromonadaceae	1	0.000142398
2	A2	Family	Staphylococcaceae	43	0.00612311
2	A2	Family	Leuconostocaceae	4	0.000569592
2	A2	Family	Thermaceae	1	0.000142398
2	A2	Family	Waddliaceae	2	0.000284796
2	A2	Family	Streptococcaceae	18	0.00256316
2	A2	Family	Lachnospiraceae	15	0.00213597
2	A2	Family	Sinobacteraceae	12	0.00170878
2	A2	Family	Mycoplasmataceae	5	0.00071199
2	A2	Family	Syntrophobacteraceae	2	0.000284796
2	A2	Family	Caldicellulosiruptoraceae	2	0.000284796
2	A2	Family	Nocardiaceae	16	0.00227837
2	A2	Family	Porphyromonadaceae	3	0.000427194
2	A2	Family	Deferribacteraceae	1	0.000142398
2	A2	Family	Clostridiaceae	7	0.000996786
2	A2	Family	Thiotrichaceae	4	0.000569592
2	A2	Family	Desulfonatronumaceae	4	0.000569592
2	A2	Family	Anaerolinaceae	2	0.000284796
2	A2	Family	Thermodesulfovibrionaceae	3	0.000427194
2	A2	Family	Enterococcaceae	1	0.000142398
2	A2	Family	Phormidiaceae	1	0.000142398
2	A2	Family	Planctomycetaceae	12	0.00170878
2	A2	Family	Idiomarinaceae	3	0.000427194
2	A2	Family	Aeromonadaceae	3	0.000427194
2	A2	Family	Brocadiaceae	4	0.000569592
2	A2	Family	Bradyrhizobiaceae	7	0.000996786
2	A2	Family	Anaplasmataceae	9	0.00128158
2	A2	Family	Deinococcaceae	1	0.000142398
2	A2	Family	Syntrophaceae	5	0.00071199
2	A2	Family	Thermotogaceae	1	0.000142398
2	A2	Family	Propionibacteriaceae	5	0.00071199
2	A2	Family	Beijerinckiaceae	2	0.000284796
2	A2	Family	Acidobacteriaceae	1	0.000142398
2	A2	Family	Desulfobacteraceae	1	0.000142398
2	A2	Family	Chrysiogenaceae	5	0.00071199
2	A2	Family	Verrucomicrobiaceae	1	0.000142398
2	A2	Family	Desulfovibrionaceae	2	0.000284796
2	A2	Family	Leptospiraceae	1	0.000142398
2	A2	Family	Actinosynnemataceae	1	0.000142398
2	A2	Family	Microbacteriaceae	1	0.000142398
2	A2	Family	Chromatiaceae	2	0.000284796
2	A2	Family	Methylophilaceae	2	0.000284796
2	A2	Family	Moritellaceae	1	0.000142398
2	A2	Family	Rhodothermaceae	1	0.000142398
2	A2	Family	Streptomycetaceae	1	0.000142398
2	A2	Family	Saccharospirillaceae	1	0.000142398
2	A2	Family	Hydrogenophilaceae	1	0.000142398
2	A2	Genus	Unclassified	81886	11.6604
2	A2	Genus	Candidatus Amoebophilus	453364	64.5581
2	A2	Genus	Segetibacter	33169	4.7232
2	A2	Genus	Chitinophaga	9546	1.35933
2	A2	Genus	Rhodoferax	24415	3.47665
2	A2	Genus	Oxalobacter	56742	8.07995
2	A2	Genus	Acidovorax	3624	0.51605
2	A2	Genus	Limnohabitans	1534	0.218439
2	A2	Genus	Flavisolibacter	722	0.102811
2	A2	Genus	Giesbergeria	2969	0.42278
2	A2	Genus	Shewanella	68	0.00968306
2	A2	Genus	Vogesella	1405	0.200069
2	A2	Genus	Enterobacter	179	0.0254892
2	A2	Genus	Pedobacter	2064	0.293909
2	A2	Genus	Gemmata	7237	1.03053
2	A2	Genus	Pseudomonas	2221	0.316266
2	A2	Genus	Pelomonas	911	0.129725
2	A2	Genus	Megasphaera	177	0.0252044
2	A2	Genus	Paucibacter	1769	0.251902
2	A2	Genus	Ralstonia	83	0.011819
2	A2	Genus	Pirellula	1279	0.182127
2	A2	Genus	Janthinobacterium	3005	0.427906
2	A2	Genus	Pectinatus	401	0.0571016
2	A2	Genus	Campylobacter	7	0.000996786
2	A2	Genus	Chromobacterium	2056	0.29277
2	A2	Genus	Elizabethkingia	733	0.104378
2	A2	Genus	Aquitalea	412	0.058668
2	A2	Genus	Delftia	1721	0.245067
2	A2	Genus	Helicobacter	11	0.00156638
2	A2	Genus	Hydrogenophaga	667	0.0949795
2	A2	Genus	Marinobacter	245	0.0348875
2	A2	Genus	Methylobacterium	223	0.0317548
2	A2	Genus	Arthrospira	571	0.0813093
2	A2	Genus	Comamonas	1063	0.151369
2	A2	Genus	Sphingomonas	12	0.00170878
2	A2	Genus	Ancylobacter	18	0.00256316
2	A2	Genus	Hyphomicrobium	316	0.0449978
2	A2	Genus	Flammeovirga	24	0.00341755
2	A2	Genus	Chryseobacterium	559	0.0796005
2	A2	Genus	Sphingobacterium	312	0.0444282
2	A2	Genus	Variovorax	88	0.012531
2	A2	Genus	Leptothrix	97	0.0138126
2	A2	Genus	Microvirus	48	0.0068351
2	A2	Genus	Curvibacter	250	0.0355995
2	A2	Genus	Rickettsia	123	0.017515
2	A2	Genus	Methylophaga	883	0.125737
2	A2	Genus	Coxiella	3	0.000427194
2	A2	Genus	Candidatus Protochlamydia	295	0.0420074
2	A2	Genus	Pelotomaculum	9	0.00128158
2	A2	Genus	Thermogemmatispora	46	0.00655031
2	A2	Genus	Brevundimonas	64	0.00911347
2	A2	Genus	Bartonella	6	0.000854388
2	A2	Genus	Candidatus Phytoplasma	32	0.00455674
2	A2	Genus	Polaromonas	54	0.00768949
2	A2	Genus	Myroides	41	0.00583832
2	A2	Genus	Flavobacterium	118	0.016803
2	A2	Genus	Rhodoplanes	127	0.0180846
2	A2	Genus	Rhodospirillum	9	0.00128158
2	A2	Genus	Achromobacter	322	0.0458522
2	A2	Genus	Phyllobacterium	84	0.0119614
2	A2	Genus	Geobacillus	254	0.0361691
2	A2	Genus	Spirosoma	140	0.0199357
2	A2	Genus	Legionella	14	0.00199357
2	A2	Genus	Luteimonas	72	0.0102527
2	A2	Genus	Chlorobaculum	41	0.00583832
2	A2	Genus	Polynucleobacter	51	0.0072623
2	A2	Genus	Aurantimonas	9	0.00128158
2	A2	Genus	Litoricola	9	0.00128158
2	A2	Genus	Lautropia	19	0.00270556
2	A2	Genus	Chelativorans	20	0.00284796
2	A2	Genus	Rubrivivax	79	0.0112494
2	A2	Genus	Niabella	9	0.00128158
2	A2	Genus	Francisella	3	0.000427194
2	A2	Genus	Paracoccus	41	0.00583832
2	A2	Genus	Luteibacter	29	0.00412954
2	A2	Genus	Rhodobacter	59	0.00840148
2	A2	Genus	Singulisphaera	22	0.00313276
2	A2	Genus	Burkholderia	66	0.00939827
2	A2	Genus	Limnobacter	6	0.000854388
2	A2	Genus	Methylibium	13	0.00185117
2	A2	Genus	Thalassospira	56	0.00797429
2	A2	Genus	Ectothiorhodospira	75	0.0106798
2	A2	Genus	Stenotrophomonas	85	0.0121038
2	A2	Genus	Hymenobacter	9	0.00128158
2	A2	Genus	Herbaspirillum	18	0.00256316
2	A2	Genus	Hydrogenophilus	6	0.000854388
2	A2	Genus	Agrobacterium	7	0.000996786
2	A2	Genus	Methylosinus	4	0.000569592
2	A2	Genus	Candidatus Glomeribacter	4	0.000569592
2	A2	Genus	Bifidobacterium	16	0.00227837
2	A2	Genus	Lewinella	8	0.00113918
2	A2	Genus	Niastella	14	0.00199357
2	A2	Genus	Azorhizobium	30	0.00427194
2	A2	Genus	Roseospira	8	0.00113918
2	A2	Genus	Gluconobacter	3	0.000427194
2	A2	Genus	Olivibacter	18	0.00256316
2	A2	Genus	Gallionella	3	0.000427194
2	A2	Genus	Marinospirillum	6	0.000854388
2	A2	Genus	Azoarcus	1	0.000142398
2	A2	Genus	Borrelia	12	0.00170878
2	A2	Genus	Psychrobacter	4	0.000569592
2	A2	Genus	Kushneria	33	0.00469913
2	A2	Genus	Xenophilus	40	0.00569592
2	A2	Genus	Xanthomonas	13	0.00185117
2	A2	Genus	Pseudoalteromonas	1	0.000142398
2	A2	Genus	Dechloromonas	2	0.000284796
2	A2	Genus	Macrococcus	38	0.00541112
2	A2	Genus	Thiorhodospira	6	0.000854388
2	A2	Genus	Halorhodospira	1	0.000142398
2	A2	Genus	Leuconostoc	2	0.000284796
2	A2	Genus	Thiomonas	4	0.000569592
2	A2	Genus	Roseateles	8	0.00113918
2	A2	Genus	Thermus	1	0.000142398
2	A2	Genus	Runella	5	0.00071199
2	A2	Genus	Sulfurospirillum	1	0.000142398
2	A2	Genus	Waddlia	2	0.000284796
2	A2	Genus	Desulfosporosinus	1	0.000142398
2	A2	Genus	Propionivibrio	5	0.00071199
2	A2	Genus	Phenylobacterium	2	0.000284796
2	A2	Genus	Azohydromonas	8	0.00113918
2	A2	Genus	Tepidimonas	7	0.000996786
2	A2	Genus	Oligella	1	0.000142398
2	A2	Genus	Lactococcus	18	0.00256316
2	A2	Genus	Marinomonas	37	0.00526873
2	A2	Genus	Blautia	15	0.00213597
2	A2	Genus	Candidatus Liberibacter	5	0.00071199
2	A2	Genus	Hydrocarboniphaga	12	0.00170878
2	A2	Genus	Candidatus Blochmannia	7	0.000996786
2	A2	Genus	Mycoplasma	5	0.00071199
2	A2	Genus	Halomonas	4	0.000569592
2	A2	Genus	Caldicellulosiruptor	2	0.000284796
2	A2	Genus	Rhodococcus	16	0.00227837
2	A2	Genus	Azospirillum	1	0.000142398
2	A2	Genus	Porphyromonas	2	0.000284796
2	A2	Genus	Deferribacter	1	0.000142398
2	A2	Genus	Mitsuaria	14	0.00199357
2	A2	Genus	Sphingobium	10	0.00142398
2	A2	Genus	Thermoanaerobacterium	1	0.000142398
2	A2	Genus	Thiothrix	3	0.000427194
2	A2	Genus	Desulfonatronum	4	0.000569592
2	A2	Genus	Stenoxybacter	1	0.000142398
2	A2	Genus	Skermanella	5	0.00071199
2	A2	Genus	Trabulsiella	9	0.00128158
2	A2	Genus	Brenneria	7	0.000996786
2	A2	Genus	Bellilinea	2	0.000284796
2	A2	Genus	Thermodesulfovibrio	3	0.000427194
2	A2	Genus	Dokdonella	1	0.000142398
2	A2	Genus	Collimonas	5	0.00071199
2	A2	Genus	Dysgonomonas	1	0.000142398
2	A2	Genus	Thauera	1	0.000142398
2	A2	Genus	Enterococcus	1	0.000142398
2	A2	Genus	Phaeobacter	6	0.000854388
2	A2	Genus	Microcoleus	1	0.000142398
2	A2	Genus	Alkaliphilus	1	0.000142398
2	A2	Genus	Pedomicrobium	2	0.000284796
2	A2	Genus	Tenacibaculum	2	0.000284796
2	A2	Genus	Planctomyces	12	0.00170878
2	A2	Genus	Rickettsiella	2	0.000284796
2	A2	Genus	Ramlibacter	4	0.000569592
2	A2	Genus	Pseudidiomarina	3	0.000427194
2	A2	Genus	Deefgea	2	0.000284796
2	A2	Genus	Tolumonas	3	0.000427194
2	A2	Genus	Gramella	1	0.000142398
2	A2	Genus	Candidatus Scalindua	4	0.000569592
2	A2	Genus	Nitrobacter	1	0.000142398
2	A2	Genus	Neorickettsia	5	0.00071199
2	A2	Genus	Dyadobacter	1	0.000142398
2	A2	Genus	Polaribacter	1	0.000142398
2	A2	Genus	Deinococcus	1	0.000142398
2	A2	Genus	Desulfomonile	5	0.00071199
2	A2	Genus	Fervidobacterium	1	0.000142398
2	A2	Genus	Propionibacterium	5	0.00071199
2	A2	Genus	Mesorhizobium	4	0.000569592
2	A2	Genus	Salinicoccus	2	0.000284796
2	A2	Genus	Beijerinckia	1	0.000142398
2	A2	Genus	Novosphingobium	1	0.000142398
2	A2	Genus	Acholeplasma	1	0.000142398
2	A2	Genus	Edaphobacter	1	0.000142398
2	A2	Genus	Clostridium	1	0.000142398
2	A2	Genus	Bradyrhizobium	6	0.000854388
2	A2	Genus	Denitratisoma	4	0.000569592
2	A2	Genus	Ehrlichia	4	0.000569592
2	A2	Genus	Desulfurispirillum	5	0.00071199
2	A2	Genus	Candidatus Endobugula	1	0.000142398
2	A2	Genus	Rubritalea	1	0.000142398
2	A2	Genus	Desulfovibrio	2	0.000284796
2	A2	Genus	Methylocella	1	0.000142398
2	A2	Genus	Leptospira	1	0.000142398
2	A2	Genus	Acinetobacter	1	0.000142398
2	A2	Genus	Actinokineospora	1	0.000142398
2	A2	Genus	Microbacterium	1	0.000142398
2	A2	Genus	Alishewanella	1	0.000142398
2	A2	Genus	Leucothrix	1	0.000142398
2	A2	Genus	Weissella	1	0.000142398
2	A2	Genus	Methylobacillus	2	0.000284796
2	A2	Genus	Roseomonas	1	0.000142398
2	A2	Genus	Klebsiella	1	0.000142398
2	A2	Genus	Gillisia	2	0.000284796
2	A2	Genus	Devosia	2	0.000284796
2	A2	Genus	Oenococcus	1	0.000142398
2	A2	Genus	Moritella	1	0.000142398
2	A2	Genus	Azomonas	1	0.000142398
2	A2	Genus	Rhodothermus	1	0.000142398
2	A2	Genus	Streptomyces	1	0.000142398
2	A2	Genus	Saccharospirillum	1	0.000142398
2	A2	Genus	Rhizobium	1	0.000142398
2	A2	Genus	Thiobacillus	1	0.000142398
2	A2	Species	Unclassified	120557	17.1671
2	A2	Species	Candidatus Amoebophilus asiaticus	453364	64.5581
2	A2	Species	Segetibacter aerophilus	33086	4.71138
2	A2	Species	Chitinophaga soli	9544	1.35905
2	A2	Species	Rhodoferax antarcticus	7554	1.07567
2	A2	Species	Oxalobacter vibrioformis	56742	8.07995
2	A2	Species	Acidovorax delafieldii	1104	0.157207
2	A2	Species	Flavisolibacter ginsengisoli	722	0.102811
2	A2	Species	Vogesella perlucida	290	0.0412954
2	A2	Species	Enterobacter hormaechei	114	0.0162334
2	A2	Species	Pseudomonas brenneri	823	0.117194
2	A2	Species	Pelomonas saccharophila	906	0.129013
2	A2	Species	Megasphaera hominis	177	0.0252044
2	A2	Species	Rhodoferax ferrireducens	1450	0.206477
2	A2	Species	Ralstonia insidiosa	82	0.0116766
2	A2	Species	Pirellula staleyi	1263	0.179849
2	A2	Species	Janthinobacterium agaricidamnosum	3005	0.427906
2	A2	Species	Pectinatus cerevisiiphilus	401	0.0571016
2	A2	Species	Acidovorax facilis	389	0.0553928
2	A2	Species	Elizabethkingia meningoseptica	727	0.103523
2	A2	Species	Aquitalea denitrificans	412	0.058668
2	A2	Species	Delftia lacustris	1698	0.241792
2	A2	Species	Acidovorax wohlfahrtii	1675	0.238517
2	A2	Species	Hydrogenophaga defluvii	667	0.0949795
2	A2	Species	Marinobacter arcticus	244	0.0347451
2	A2	Species	Methylobacterium marchantiae	160	0.0227837
2	A2	Species	Arthrospira fusiformis	446	0.0635095
2	A2	Species	Flammeovirga pacifica	24	0.00341755
2	A2	Species	Chryseobacterium indologenes	438	0.0623703
2	A2	Species	Sphingobacterium shayense	312	0.0444282
2	A2	Species	Variovorax boronicumulans	73	0.010395
2	A2	Species	Leptothrix discophora	97	0.0138126
2	A2	Species	Comamonas kerstersii	298	0.0424346
2	A2	Species	Microvirus Enterobacteria phage PhiX174	48	0.0068351
2	A2	Species	Enterobacter amnigenus	54	0.00768949
2	A2	Species	Curvibacter gracilis	211	0.030046
2	A2	Species	Comamonas nitrativorans	91	0.0129582
2	A2	Species	Candidatus Protochlamydia amoebophila	253	0.0360267
2	A2	Species	Pseudomonas collierea	64	0.00911347
2	A2	Species	Pelotomaculum isophthalicicum	9	0.00128158
2	A2	Species	Brevundimonas staleyi	51	0.0072623
2	A2	Species	Bartonella rochalimae	5	0.00071199
2	A2	Species	Pseudomonas plecoglossicida	329	0.046849
2	A2	Species	Myroides odoratus	37	0.00526873
2	A2	Species	Flavobacterium swingsii	88	0.012531
2	A2	Species	Achromobacter insolitus	20	0.00284796
2	A2	Species	Phyllobacterium catacumbae	84	0.0119614
2	A2	Species	Pseudomonas pseudoalcaligenes	539	0.0767525
2	A2	Species	Pseudomonas panipatensis	87	0.0123886
2	A2	Species	Pseudomonas cremoricolorata	33	0.00469913
2	A2	Species	Spirosoma linguale	140	0.0199357
2	A2	Species	Hyphomicrobium aestuarii	13	0.00185117
2	A2	Species	Pseudomonas mosselii	15	0.00213597
2	A2	Species	Acidovorax temperans	196	0.02791
2	A2	Species	Aurantimonas litoralis	9	0.00128158
2	A2	Species	Curvibacter lanceolatus	20	0.00284796
2	A2	Species	Lautropia mirabilis	19	0.00270556
2	A2	Species	Chryseobacterium isbiliense	4	0.000569592
2	A2	Species	Achromobacter xylosoxidans	24	0.00341755
2	A2	Species	Achromobacter piechaudii	23	0.00327515
2	A2	Species	Rubrivivax gelatinosus	8	0.00113918
2	A2	Species	Niabella soli	8	0.00113918
2	A2	Species	Francisella hispaniensis	3	0.000427194
2	A2	Species	Acidovorax anthurii	44	0.00626551
2	A2	Species	Luteibacter anthropi	29	0.00412954
2	A2	Species	Rhodobacter gluconicum	5	0.00071199
2	A2	Species	Limnobacter litoralis	6	0.000854388
2	A2	Species	Ectothiorhodospira haloalkaliphila	75	0.0106798
2	A2	Species	Achromobacter arsenitoxydans	28	0.00398714
2	A2	Species	Stenotrophomonas pavanii	10	0.00142398
2	A2	Species	Herbaspirillum aquaticum	3	0.000427194
2	A2	Species	Herbaspirillum frisingense	1	0.000142398
2	A2	Species	Bifidobacterium bombi	14	0.00199357
2	A2	Species	Lewinella marina	4	0.000569592
2	A2	Species	Niastella koreensis	14	0.00199357
2	A2	Species	Hyphomicrobium sulfonivorans	13	0.00185117
2	A2	Species	Gallionella ferruginea	3	0.000427194
2	A2	Species	Pseudomonas marginalis	7	0.000996786
2	A2	Species	Pseudomonas tremae	7	0.000996786
2	A2	Species	Comamonas composti	45	0.00640791
2	A2	Species	Campylobacter faecalis	5	0.00071199
2	A2	Species	Herbaspirillum chlorophenolicum	8	0.00113918
2	A2	Species	Pseudomonas veronii	4	0.000569592
2	A2	Species	Comamonas odontotermitis	3	0.000427194
2	A2	Species	Paracoccus aestuarii	1	0.000142398
2	A2	Species	Kushneria aurantia	32	0.00455674
2	A2	Species	Variovorax dokdonensis	10	0.00142398
2	A2	Species	Xanthomonas oryzae	13	0.00185117
2	A2	Species	Acidovorax valerianellae	2	0.000284796
2	A2	Species	Methylobacterium adhaesivum	35	0.00498393
2	A2	Species	Dechloromonas hortensis	2	0.000284796
2	A2	Species	Chryseobacterium greenlandense	1	0.000142398
2	A2	Species	Limnohabitans parvus	15	0.00213597
2	A2	Species	Halorhodospira halochloris	1	0.000142398
2	A2	Species	Giesbergeria voronezhensis	8	0.00113918
2	A2	Species	Gemmata obscuriglobus	7	0.000996786
2	A2	Species	Thiomonas perometabolis	2	0.000284796
2	A2	Species	Roseateles depolymerans	8	0.00113918
2	A2	Species	Agrobacterium tumefaciens	4	0.000569592
2	A2	Species	Chromobacterium subtsugae	1	0.000142398
2	A2	Species	Runella limosa	5	0.00071199
2	A2	Species	Stenotrophomonas geniculata	53	0.00754709
2	A2	Species	Desulfosporosinus hippei	1	0.000142398
2	A2	Species	Propionivibrio dicarboxylicus	5	0.00071199
2	A2	Species	Pseudomonas moraviensis	55	0.00783189
2	A2	Species	Paracoccus marinus	4	0.000569592
2	A2	Species	Chryseobacterium gleum	2	0.000284796
2	A2	Species	Delftia tsuruhatensis	11	0.00156638
2	A2	Species	Oligella ureolytica	1	0.000142398
2	A2	Species	Pseudomonas jinjuensis	6	0.000854388
2	A2	Species	Pseudomonas entomophila	1	0.000142398
2	A2	Species	Pseudomonas benzenivorans	8	0.00113918
2	A2	Species	Candidatus Liberibacter solanacearum	2	0.000284796
2	A2	Species	Chromobacterium haemolyticum	4	0.000569592
2	A2	Species	Candidatus Blochmannia castaneus	6	0.000854388
2	A2	Species	Mycoplasma iguanae	3	0.000427194
2	A2	Species	Chryseobacterium caeni	1	0.000142398
2	A2	Species	Burkholderia ubonensis	23	0.00327515
2	A2	Species	Halomonas neptunia	2	0.000284796
2	A2	Species	Herbaspirillum rubrisubalbicans	4	0.000569592
2	A2	Species	Rhodococcus qingshengii	12	0.00170878
2	A2	Species	Azospirillum rugosum	1	0.000142398
2	A2	Species	Porphyromonas canis	2	0.000284796
2	A2	Species	Polaromonas naphthalenivorans	3	0.000427194
2	A2	Species	Deferribacter autotrophicus	1	0.000142398
2	A2	Species	Mitsuaria chitosanitabida	14	0.00199357
2	A2	Species	Sphingobium abikonense	7	0.000996786
2	A2	Species	Agrobacterium viscosum	2	0.000284796
2	A2	Species	Pseudomonas chloritidismutans	2	0.000284796
2	A2	Species	Brevundimonas olei	1	0.000142398
2	A2	Species	Burkholderia andropogonis	1	0.000142398
2	A2	Species	Polynucleobacter rarus	2	0.000284796
2	A2	Species	Thermoanaerobacterium islandicum	1	0.000142398
2	A2	Species	Chryseobacterium oranimense	3	0.000427194
2	A2	Species	Desulfonatronum thiosulfatophilum	4	0.000569592
2	A2	Species	Stenotrophomonas retroflexus	4	0.000569592
2	A2	Species	Skermanella aerolata	5	0.00071199
2	A2	Species	Vogesella indigofera	1	0.000142398
2	A2	Species	Luteimonas terricola	2	0.000284796
2	A2	Species	Giesbergeria sinuosa	3	0.000427194
2	A2	Species	Pseudomonas putida	6	0.000854388
2	A2	Species	Elizabethkingia anophelis	5	0.00071199
2	A2	Species	Bellilinea caldifistulae	2	0.000284796
2	A2	Species	Rhodoferax fermentans	3	0.000427194
2	A2	Species	Mycoplasma timone	2	0.000284796
2	A2	Species	Herbaspirillum magnetovibrio	2	0.000284796
2	A2	Species	Pseudomonas teessidea	6	0.000854388
2	A2	Species	Thermodesulfovibrio thiophilus	2	0.000284796
2	A2	Species	Dokdonella fugitiva	1	0.000142398
2	A2	Species	Collimonas pratensis	4	0.000569592
2	A2	Species	Dysgonomonas wimpennyi	1	0.000142398
2	A2	Species	Thauera terpenica	1	0.000142398
2	A2	Species	Myroides injenensis	2	0.000284796
2	A2	Species	Shewanella pneumatophori	1	0.000142398
2	A2	Species	Pedobacter koreensis	6	0.000854388
2	A2	Species	Variovorax soli	2	0.000284796
2	A2	Species	Microcoleus antarcticus	1	0.000142398
2	A2	Species	Alkaliphilus crotonatoxidans	1	0.000142398
2	A2	Species	Enterobacter nickellidurans	1	0.000142398
2	A2	Species	Planctomyces limnophilus	3	0.000427194
2	A2	Species	Hydrogenophilus denitrificans	3	0.000427194
2	A2	Species	Ramlibacter tataouinensis	4	0.000569592
2	A2	Species	Comamonas koreensis	4	0.000569592
2	A2	Species	Burkholderia seminalis	3	0.000427194
2	A2	Species	Pseudidiomarina donghaiensis	1	0.000142398
2	A2	Species	Candidatus Blochmannia vafer	1	0.000142398
2	A2	Species	Deefgea rivuli	2	0.000284796
2	A2	Species	Tolumonas auensis	3	0.000427194
2	A2	Species	Candidatus Scalindua brodae	4	0.000569592
2	A2	Species	Nitrobacter alkalicus	1	0.000142398
2	A2	Species	Neorickettsia helminthoeca	5	0.00071199
2	A2	Species	Azohydromonas australica	2	0.000284796
2	A2	Species	Pedobacter himalayensis	2	0.000284796
2	A2	Species	Paracoccus carotinifaciens	2	0.000284796
2	A2	Species	Polaribacter butkevichii	1	0.000142398
2	A2	Species	Desulfomonile tiedjei	5	0.00071199
2	A2	Species	Pedobacter africanus	3	0.000427194
2	A2	Species	Fervidobacterium islandicum	1	0.000142398
2	A2	Species	Paracoccus sulfuroxidans	1	0.000142398
2	A2	Species	Propionibacterium acnes	5	0.00071199
2	A2	Species	Mesorhizobium camelthorni	4	0.000569592
2	A2	Species	Salinicoccus iranensis	2	0.000284796
2	A2	Species	Methylophaga lonarensis	1	0.000142398
2	A2	Species	Beijerinckia derxii	1	0.000142398
2	A2	Species	Novosphingobium yangbajingensis	1	0.000142398
2	A2	Species	Trabulsiella odontotermitis	6	0.000854388
2	A2	Species	Edaphobacter modestus	1	0.000142398
2	A2	Species	Rhodococcus baikonurensis	1	0.000142398
2	A2	Species	Delftia acidovorans	1	0.000142398
2	A2	Species	Burkholderia phenoliruptrix	4	0.000569592
2	A2	Species	Pedobacter daejeonensis	1	0.000142398
2	A2	Species	Denitratisoma oestradiolicum	4	0.000569592
2	A2	Species	Methylobacterium goesingense	1	0.000142398
2	A2	Species	Tepidimonas thermarum	2	0.000284796
2	A2	Species	Rhodobacter apigmentum	2	0.000284796
2	A2	Species	Ehrlichia ovina	4	0.000569592
2	A2	Species	Rickettsia monacensis	1	0.000142398
2	A2	Species	Paracoccus homiensis	1	0.000142398
2	A2	Species	Polaromonas vacuolata	6	0.000854388
2	A2	Species	Flavobacterium terrigena	1	0.000142398
2	A2	Species	Desulfurispirillum alkaliphilum	5	0.00071199
2	A2	Species	Tepidimonas ignava	1	0.000142398
2	A2	Species	Helicobacter suncus	1	0.000142398
2	A2	Species	Enterobacter soli	1	0.000142398
2	A2	Species	Helicobacter mastomyrinus	1	0.000142398
2	A2	Species	Leptospira licerasiae	1	0.000142398
2	A2	Species	Pseudomonas migulae	2	0.000284796
2	A2	Species	Acinetobacter marinus	1	0.000142398
2	A2	Species	Kushneria indalinina	1	0.000142398
2	A2	Species	Chromobacterium piscinae	2	0.000284796
2	A2	Species	Pedobacter agri	1	0.000142398
2	A2	Species	Actinokineospora inagensis	1	0.000142398
2	A2	Species	Chryseobacterium taichungense	1	0.000142398
2	A2	Species	Leucothrix mucor	1	0.000142398
2	A2	Species	Flavobacterium suncheonense	3	0.000427194
2	A2	Species	Sphingomonas insulae	1	0.000142398
2	A2	Species	Roseomonas massiliensis	1	0.000142398
2	A2	Species	Klebsiella granulomatis	1	0.000142398
2	A2	Species	Marinobacter squalenivorans	1	0.000142398
2	A2	Species	Niabella aurantiaca	1	0.000142398
2	A2	Species	Moritella japonica	1	0.000142398
2	A2	Species	Legionella taurinensis	3	0.000427194
2	A2	Species	Pedobacter insulae	1	0.000142398
2	A2	Species	Rhodothermus clarus	1	0.000142398
2	A2	Species	Streptomyces lazureus	1	0.000142398
2	A2	Species	Methylobacillus glycogenes	1	0.000142398
2	A2	Species	Chryseobacterium joostei	1	0.000142398
2	A2	Species	Rhizobium alamii	1	0.000142398
2	A2	Species	Thiobacillus thiophilus	1	0.000142398
2	A2	Species	Stenotrophomonas koreensis	1	0.000142398
3	A3	Kingdom	Unclassified	14499	1.95782
3	A3	Kingdom	Bacteria	726044	98.0385
3	A3	Kingdom	Viruses	26	0.00351081
3	A3	Kingdom	Archaea	1	0.000135031
3	A3	Phylum	Unclassified	16066	2.16941
3	A3	Phylum	Bacteroidetes	596318	80.5215
3	A3	Phylum	Proteobacteria	76006	10.2632
3	A3	Phylum	Firmicutes	3968	0.535803
3	A3	Phylum	Planctomycetes	44407	5.99633
3	A3	Phylum	Chloroflexi	485	0.0654901
3	A3	Phylum	Nitrospirae	9	0.00121528
3	A3	Phylum	Chlamydiae	2639	0.356347
3	A3	Phylum	Cyanobacteria	476	0.0642748
3	A3	Phylum	Tenericutes	46	0.00621143
3	A3	Phylum	Actinobacteria	61	0.0082369
3	A3	Phylum	Chlorobi	7	0.000945218
3	A3	Phylum	Acidobacteria	2	0.000270062
3	A3	Phylum	Thermi	8	0.00108025
3	A3	Phylum	Chrysiogenetes	6	0.000810187
3	A3	Phylum	Verrucomicrobia	36	0.00486112
3	A3	Phylum	DNA	26	0.00351081
3	A3	Phylum	Crenarchaeota	1	0.000135031
3	A3	Phylum	Spirochaetes	1	0.000135031
3	A3	Phylum	Thermotogae	2	0.000270062
3	A3	Class	Unclassified	17268	2.33172
3	A3	Class	Sphingobacteriia	593786	80.1796
3	A3	Class	Gammaproteobacteria	16077	2.17089
3	A3	Class	Clostridia	3069	0.414411
3	A3	Class	Planctomycetia	44392	5.9943
3	A3	Class	Betaproteobacteria	53726	7.25468
3	A3	Class	Alphaproteobacteria	5056	0.682717
3	A3	Class	Ktedonobacteria	465	0.0627895
3	A3	Class	Bacilli	894	0.120718
3	A3	Class	Nitrospira	9	0.00121528
3	A3	Class	Chlamydiia	2639	0.356347
3	A3	Class	Synechococcophycideae	464	0.0626544
3	A3	Class	Flavobacteriia	2447	0.330421
3	A3	Class	Mollicutes	46	0.00621143
3	A3	Class	Actinobacteria	60	0.00810187
3	A3	Class	Chlorobia	7	0.000945218
3	A3	Class	Deltaproteobacteria	25	0.00337578
3	A3	Class	Acidobacteria	2	0.000270062
3	A3	Class	Deinococci	8	0.00108025
3	A3	Class	Epsilonproteobacteria	20	0.00270062
3	A3	Class	Chrysiogenetes	6	0.000810187
3	A3	Class	Pedosphaerae	33	0.00445603
3	A3	Class	Bacteroidia	4	0.000540124
3	A3	Class	Anaerolineae	20	0.00270062
3	A3	Class	Group II	26	0.00351081
3	A3	Class	Nostocophycideae	2	0.000270062
3	A3	Class	Nitriliruptoria	1	0.000135031
3	A3	Class	Thermoprotei	1	0.000135031
3	A3	Class	Spirochaetes	1	0.000135031
3	A3	Class	Brocadiae	10	0.00135031
3	A3	Class	Thermotogae	2	0.000270062
3	A3	Class	Oscillatoriophycideae	1	0.000135031
3	A3	Class	Opitutae	2	0.000270062
3	A3	Class	Methylacidiphilae	1	0.000135031
3	A3	Order	Unclassified	18225	2.46094
3	A3	Order	Sphingobacteriales	593786	80.1796
3	A3	Order	Enterobacteriales	4045	0.546201
3	A3	Order	Alteromonadales	2033	0.274518
3	A3	Order	Clostridiales	3033	0.409549
3	A3	Order	Gemmatales	40862	5.51764
3	A3	Order	Burkholderiales	51057	6.89428
3	A3	Order	Rhizobiales	1226	0.165548
3	A3	Order	Pseudomonadales	8501	1.1479
3	A3	Order	Thermogemmatisporales	465	0.0627895
3	A3	Order	Caulobacterales	2741	0.37012
3	A3	Order	Rickettsiales	162	0.021875
3	A3	Order	Rhodobacterales	825	0.111401
3	A3	Order	Bacillales	886	0.119638
3	A3	Order	Nitrospirales	9	0.00121528
3	A3	Order	Chlamydiales	2639	0.356347
3	A3	Order	Pirellulales	3267	0.441147
3	A3	Order	Xanthomonadales	966	0.13044
3	A3	Order	Pseudanabaenales	464	0.0626544
3	A3	Order	Flavobacteriales	2447	0.330421
3	A3	Order	Acholeplasmatales	43	0.00580634
3	A3	Order	Neisseriales	2033	0.274518
3	A3	Order	Bifidobacteriales	24	0.00324075
3	A3	Order	Thiotrichales	279	0.0376737
3	A3	Order	Rhodospirillales	37	0.00499615
3	A3	Order	Chlorobiales	7	0.000945218
3	A3	Order	Oceanospirillales	75	0.0101273
3	A3	Order	Actinomycetales	36	0.00486112
3	A3	Order	Syntrophobacterales	13	0.00175541
3	A3	Order	Legionellales	16	0.0021605
3	A3	Order	Rhodocyclales	16	0.0021605
3	A3	Order	Acidobacteriales	2	0.000270062
3	A3	Order	Deinococcales	7	0.000945218
3	A3	Order	Planctomycetales	98	0.013233
3	A3	Order	Campylobacterales	20	0.00270062
3	A3	Order	Sphingomonadales	40	0.00540124
3	A3	Order	Chrysiogenales	6	0.000810187
3	A3	Order	Pedosphaerales	33	0.00445603
3	A3	Order	Chromatiales	15	0.00202547
3	A3	Order	Bacteroidales	4	0.000540124
3	A3	Order	Anaerolineales	18	0.00243056
3	A3	Order	Lactobacillales	7	0.000945218
3	A3	Order	Gallionellales	2	0.000270062
3	A3	Order	(Microviridae)	26	0.00351081
3	A3	Order	Nostocales	2	0.000270062
3	A3	Order	Thiohalorhabdales	8	0.00108025
3	A3	Order	Thermales	1	0.000135031
3	A3	Order	Thermoanaerobacterales	3	0.000405093
3	A3	Order	Aeromonadales	13	0.00175541
3	A3	Order	Desulfovibrionales	8	0.00108025
3	A3	Order	Euzebyales	1	0.000135031
3	A3	Order	Methylophilales	2	0.000270062
3	A3	Order	Thermicanales	1	0.000135031
3	A3	Order	Thermoproteales	1	0.000135031
3	A3	Order	Vibrionales	8	0.00108025
3	A3	Order	Myxococcales	2	0.000270062
3	A3	Order	Spirochaetales	1	0.000135031
3	A3	Order	Brocadiales	10	0.00135031
3	A3	Order	Thermotogales	2	0.000270062
3	A3	Order	Chroococcales	1	0.000135031
3	A3	Order	Pasteurellales	1	0.000135031
3	A3	Order	Mycoplasmatales	3	0.000405093
3	A3	Order	Pelagicoccales	2	0.000270062
3	A3	Order	Methylacidiphilales	1	0.000135031
3	A3	Order	Caldilineales	2	0.000270062
3	A3	Order	Methylococcales	1	0.000135031
3	A3	Family	Unclassified	32332	4.36583
3	A3	Family	Amoebophilaceae	523840	70.7347
3	A3	Family	Enterobacteriaceae	4045	0.546201
3	A3	Family	Alteromonadaceae	1957	0.264256
3	A3	Family	Veillonellaceae	2946	0.397802
3	A3	Family	Chitinophagaceae	52758	7.12397
3	A3	Family	Gemmataceae	40729	5.49968
3	A3	Family	Comamonadaceae	49416	6.6727
3	A3	Family	Hyphomicrobiaceae	315	0.0425348
3	A3	Family	Pseudomonadaceae	8496	1.14722
3	A3	Family	Thermogemmatisporaceae	465	0.0627895
3	A3	Family	Caulobacteraceae	2741	0.37012
3	A3	Family	Rickettsiaceae	154	0.0207948
3	A3	Family	Rhodobacteraceae	821	0.110861
3	A3	Family	Sphingobacteriaceae	3292	0.444522
3	A3	Family	Bacillaceae	778	0.105054
3	A3	Family	Thermodesulfovibrionaceae	9	0.00121528
3	A3	Family	Parachlamydiaceae	2604	0.351621
3	A3	Family	Pirellulaceae	3267	0.441147
3	A3	Family	Xanthomonadaceae	962	0.1299
3	A3	Family	Pseudanabaenaceae	464	0.0626544
3	A3	Family	Bradyrhizobiaceae	615	0.0830441
3	A3	Family	Flavobacteriaceae	2447	0.330421
3	A3	Family	Acholeplasmataceae	43	0.00580634
3	A3	Family	Neisseriaceae	2033	0.274518
3	A3	Family	Oxalobacteraceae	1431	0.193229
3	A3	Family	Methylocystaceae	2	0.000270062
3	A3	Family	Rhizobiaceae	125	0.0168789
3	A3	Family	Bifidobacteriaceae	24	0.00324075
3	A3	Family	Piscirickettsiaceae	277	0.0374036
3	A3	Family	Rhodospirillaceae	31	0.00418596
3	A3	Family	Phyllobacteriaceae	56	0.00756174
3	A3	Family	Peptococcaceae	38	0.00513118
3	A3	Family	Saprospiraceae	13	0.00175541
3	A3	Family	Alcaligenaceae	103	0.0139082
3	A3	Family	Chlorobiaceae	7	0.000945218
3	A3	Family	Halomonadaceae	13	0.00175541
3	A3	Family	Isosphaeraceae	113	0.0152585
3	A3	Family	Streptosporangiaceae	5	0.000675156
3	A3	Family	Beijerinckiaceae	8	0.00108025
3	A3	Family	Shewanellaceae	55	0.00742671
3	A3	Family	Streptomycetaceae	2	0.000270062
3	A3	Family	Staphylococcaceae	106	0.0143133
3	A3	Family	Thiotrichaceae	2	0.000270062
3	A3	Family	Oceanospirillaceae	32	0.004321
3	A3	Family	Desulfobacteraceae	4	0.000540124
3	A3	Family	Francisellaceae	4	0.000540124
3	A3	Family	Rhodocyclaceae	16	0.0021605
3	A3	Family	Acidobacteriaceae	2	0.000270062
3	A3	Family	Deinococcaceae	7	0.000945218
3	A3	Family	Planctomycetaceae	98	0.013233
3	A3	Family	Helicobacteraceae	10	0.00135031
3	A3	Family	Sphingomonadaceae	40	0.00540124
3	A3	Family	Chrysiogenaceae	6	0.000810187
3	A3	Family	Chromatiaceae	15	0.00202547
3	A3	Family	Clostridiaceae	7	0.000945218
3	A3	Family	Rhabdochlamydiaceae	4	0.000540124
3	A3	Family	Legionellaceae	11	0.00148534
3	A3	Family	Pedosphaeraceae	33	0.00445603
3	A3	Family	Syntrophobacteraceae	2	0.000270062
3	A3	Family	Litoricolaceae	24	0.00324075
3	A3	Family	Porphyromonadaceae	4	0.000540124
3	A3	Family	Burkholderiaceae	28	0.00378087
3	A3	Family	Anaerolinaceae	18	0.00243056
3	A3	Family	Propionibacteriaceae	7	0.000945218
3	A3	Family	Gallionellaceae	2	0.000270062
3	A3	Family	Ectothiorhodospiraceae	5	0.000675156
3	A3	Family	Saccharospirillaceae	1	0.000135031
3	A3	Family	Microviridae	26	0.00351081
3	A3	Family	Nostocaceae	2	0.000270062
3	A3	Family	Lachnospiraceae	3	0.000405093
3	A3	Family	Anaplasmataceae	8	0.00108025
3	A3	Family	Hyphomonadaceae	3	0.000405093
3	A3	Family	Flexibacteraceae	25	0.00337578
3	A3	Family	Thiohalorhabdaceae	8	0.00108025
3	A3	Family	Thermaceae	1	0.000135031
3	A3	Family	Thermoanaerobacteraceae	1	0.000135031
3	A3	Family	Aeromonadaceae	13	0.00175541
3	A3	Family	Campylobacteraceae	9	0.00121528
3	A3	Family	Moraxellaceae	4	0.000540124
3	A3	Family	Pseudoalteromonadaceae	8	0.00108025
3	A3	Family	Xanthobacteraceae	48	0.00648149
3	A3	Family	Sinobacteraceae	4	0.000540124
3	A3	Family	Syntrophaceae	7	0.000945218
3	A3	Family	Desulfonatronumaceae	4	0.000540124
3	A3	Family	Idiomarinaceae	3	0.000405093
3	A3	Family	Acetobacteraceae	5	0.000675156
3	A3	Family	Euzebyaceae	1	0.000135031
3	A3	Family	Desulfovibrionaceae	4	0.000540124
3	A3	Family	Methylophilaceae	2	0.000270062
3	A3	Family	Thermicanaceae	1	0.000135031
3	A3	Family	Thermoproteaceae	1	0.000135031
3	A3	Family	Vibrionaceae	8	0.00108025
3	A3	Family	Nannocystaceae	2	0.000270062
3	A3	Family	Leuconostocaceae	1	0.000135031
3	A3	Family	Spirochaetaceae	1	0.000135031
3	A3	Family	Brocadiaceae	10	0.00135031
3	A3	Family	Coxiellaceae	1	0.000135031
3	A3	Family	Thermotogaceae	2	0.000270062
3	A3	Family	Waddliaceae	7	0.000945218
3	A3	Family	Phormidiaceae	1	0.000135031
3	A3	Family	Pasteurellaceae	1	0.000135031
3	A3	Family	Caldicellulosiruptoraceae	2	0.000270062
3	A3	Family	Alcanivoracaceae	2	0.000270062
3	A3	Family	Mycoplasmataceae	3	0.000405093
3	A3	Family	Aurantimonadaceae	1	0.000135031
3	A3	Family	Glycomycetaceae	2	0.000270062
3	A3	Family	Lactobacillaceae	1	0.000135031
3	A3	Family	Pelagicoccaceae	2	0.000270062
3	A3	Family	Methylobacteriaceae	3	0.000405093
3	A3	Family	Methylacidiphilaceae	1	0.000135031
3	A3	Family	Eubacteriaceae	1	0.000135031
3	A3	Family	Moritellaceae	2	0.000270062
3	A3	Family	Rhodothermaceae	1	0.000135031
3	A3	Family	Caldilineaceae	2	0.000270062
3	A3	Family	Crenotrichaceae	1	0.000135031
3	A3	Family	Planococcaceae	1	0.000135031
3	A3	Genus	Unclassified	76177	10.2863
3	A3	Genus	Candidatus Amoebophilus	523840	70.7347
3	A3	Genus	Escherichia	2327	0.314217
3	A3	Genus	Marinobacter	295	0.0398342
3	A3	Genus	Pectinatus	1808	0.244136
3	A3	Genus	Chitinophaga	9812	1.32492
3	A3	Genus	Gemmata	40729	5.49968
3	A3	Genus	Segetibacter	38228	5.16197
3	A3	Genus	Devosia	86	0.0116127
3	A3	Genus	Flavisolibacter	978	0.13206
3	A3	Genus	Hydrogenophaga	527	0.0711614
3	A3	Genus	Cellvibrio	1649	0.222666
3	A3	Genus	Pseudomonas	8495	1.14709
3	A3	Genus	Thermogemmatispora	465	0.0627895
3	A3	Genus	Arthrospira	1984	0.267902
3	A3	Genus	Limnohabitans	165	0.0222801
3	A3	Genus	Rhodoferax	1989	0.268577
3	A3	Genus	Rickettsia	154	0.0207948
3	A3	Genus	Rhodobacter	794	0.107215
3	A3	Genus	Pedobacter	2861	0.386324
3	A3	Genus	Delftia	3119	0.421162
3	A3	Genus	Geobacillus	777	0.104919
3	A3	Genus	Thermodesulfovibrio	9	0.00121528
3	A3	Genus	Megasphaera	1136	0.153395
3	A3	Genus	Candidatus Protochlamydia	2604	0.351621
3	A3	Genus	Pirellula	3267	0.441147
3	A3	Genus	Stenotrophomonas	946	0.127739
3	A3	Genus	Giesbergeria	2706	0.365394
3	A3	Genus	Acidovorax	1027	0.138677
3	A3	Genus	Thiomonas	16	0.0021605
3	A3	Genus	Comamonas	199	0.0268712
3	A3	Genus	Leptolyngbya	455	0.0614392
3	A3	Genus	Brevundimonas	228	0.0307871
3	A3	Genus	Nitrobacter	220	0.0297068
3	A3	Genus	Chryseobacterium	485	0.0654901
3	A3	Genus	Candidatus Phytoplasma	43	0.00580634
3	A3	Genus	Elizabethkingia	1187	0.160282
3	A3	Genus	Bradyrhizobium	169	0.0228203
3	A3	Genus	Aquitalea	241	0.0325425
3	A3	Genus	Oxalobacter	1351	0.182427
3	A3	Genus	Methylosinus	2	0.000270062
3	A3	Genus	Sphingobacterium	374	0.0505016
3	A3	Genus	Agrobacterium	110	0.0148534
3	A3	Genus	Bifidobacterium	23	0.00310572
3	A3	Genus	Enterobacter	1213	0.163793
3	A3	Genus	Methylophaga	161	0.02174
3	A3	Genus	Serratia	222	0.0299769
3	A3	Genus	Chromobacterium	1748	0.236034
3	A3	Genus	Limnobacter	52	0.00702162
3	A3	Genus	Cycloclasticus	116	0.0156636
3	A3	Genus	Azospirillum	4	0.000540124
3	A3	Genus	Mesorhizobium	56	0.00756174
3	A3	Genus	Phaeobacter	3	0.000405093
3	A3	Genus	Glaciecola	3	0.000405093
3	A3	Genus	Desulfosporosinus	3	0.000405093
3	A3	Genus	Flavobacterium	489	0.0660302
3	A3	Genus	Myroides	131	0.0176891
3	A3	Genus	Candidatus Blochmannia	15	0.00202547
3	A3	Genus	Lewinella	13	0.00175541
3	A3	Genus	Xenophilus	97	0.013098
3	A3	Genus	Achromobacter	92	0.0124229
3	A3	Genus	Hyphomicrobium	220	0.0297068
3	A3	Genus	Mitsuaria	35	0.00472609
3	A3	Genus	Chlorobaculum	7	0.000945218
3	A3	Genus	Bosea	159	0.02147
3	A3	Genus	Rubrivivax	40	0.00540124
3	A3	Genus	Singulisphaera	107	0.0144483
3	A3	Genus	Rhodospirillum	18	0.00243056
3	A3	Genus	Streptosporangium	5	0.000675156
3	A3	Genus	Tepidimonas	2	0.000270062
3	A3	Genus	Chelatococcus	5	0.000675156
3	A3	Genus	Paucibacter	68	0.00918212
3	A3	Genus	Shewanella	55	0.00742671
3	A3	Genus	Streptomyces	2	0.000270062
3	A3	Genus	Macrococcus	91	0.0122878
3	A3	Genus	Thiothrix	2	0.000270062
3	A3	Genus	Curvibacter	117	0.0157986
3	A3	Genus	Nitrincola	21	0.00283565
3	A3	Genus	Desulfosarcina	3	0.000405093
3	A3	Genus	Francisella	4	0.000540124
3	A3	Genus	Methylibium	26	0.00351081
3	A3	Genus	Pelomonas	5	0.000675156
3	A3	Genus	Rhodocyclus	1	0.000135031
3	A3	Genus	Edaphobacter	2	0.000270062
3	A3	Genus	Pelotomaculum	30	0.00405093
3	A3	Genus	Deinococcus	7	0.000945218
3	A3	Genus	Planctomyces	98	0.013233
3	A3	Genus	Leptothrix	56	0.00756174
3	A3	Genus	Candidatus Liberibacter	6	0.000810187
3	A3	Genus	Helicobacter	10	0.00135031
3	A3	Genus	Olivibacter	26	0.00351081
3	A3	Genus	Vogesella	8	0.00108025
3	A3	Genus	Desulfurispirillum	6	0.000810187
3	A3	Genus	Alishewanella	6	0.000810187
3	A3	Genus	Clostridium	5	0.000675156
3	A3	Genus	Candidatus Rhabdochlamydia	4	0.000540124
3	A3	Genus	Rhizobium	1	0.000135031
3	A3	Genus	Legionella	11	0.00148534
3	A3	Genus	Pedosphaera	33	0.00445603
3	A3	Genus	Azohydromonas	90	0.0121528
3	A3	Genus	Marichromatium	1	0.000135031
3	A3	Genus	Janthinobacterium	52	0.00702162
3	A3	Genus	Litoricola	24	0.00324075
3	A3	Genus	Variovorax	47	0.00634646
3	A3	Genus	Porphyromonas	4	0.000540124
3	A3	Genus	Polaromonas	15	0.00202547
3	A3	Genus	Shinella	6	0.000810187
3	A3	Genus	Halomonas	8	0.00108025
3	A3	Genus	Niabella	12	0.00162037
3	A3	Genus	Burkholderia	22	0.00297068
3	A3	Genus	Stenoxybacter	3	0.000405093
3	A3	Genus	Bellilinea	17	0.00229553
3	A3	Genus	Tenacibaculum	5	0.000675156
3	A3	Genus	Propionibacterium	6	0.000810187
3	A3	Genus	Gallionella	2	0.000270062
3	A3	Genus	Luteimonas	3	0.000405093
3	A3	Genus	Ectothiorhodospira	2	0.000270062
3	A3	Genus	Saccharospirillum	1	0.000135031
3	A3	Genus	Sphingobium	9	0.00121528
3	A3	Genus	Methylonatrum	1	0.000135031
3	A3	Genus	Microvirus	26	0.00351081
3	A3	Genus	Xanthomonas	4	0.000540124
3	A3	Genus	Blautia	1	0.000135031
3	A3	Genus	Roseospira	7	0.000945218
3	A3	Genus	Niastella	30	0.00405093
3	A3	Genus	Sphingomonas	22	0.00297068
3	A3	Genus	Neorickettsia	6	0.000810187
3	A3	Genus	Asticcacaulis	2	0.000270062
3	A3	Genus	Marinospirillum	3	0.000405093
3	A3	Genus	Propionivibrio	1	0.000135031
3	A3	Genus	Hymenobacter	18	0.00243056
3	A3	Genus	Thiohalorhabdus	8	0.00108025
3	A3	Genus	Thermus	1	0.000135031
3	A3	Genus	Tolumonas	13	0.00175541
3	A3	Genus	Afipia	11	0.00148534
3	A3	Genus	Campylobacter	9	0.00121528
3	A3	Genus	Erwinia	7	0.000945218
3	A3	Genus	Caulobacter	5	0.000675156
3	A3	Genus	Marinomonas	4	0.000540124
3	A3	Genus	Acinetobacter	1	0.000135031
3	A3	Genus	Pseudoalteromonas	8	0.00108025
3	A3	Genus	Runella	7	0.000945218
3	A3	Genus	Polynucleobacter	5	0.000675156
3	A3	Genus	Isosphaera	3	0.000405093
3	A3	Genus	Azorhizobium	17	0.00229553
3	A3	Genus	Luteibacter	3	0.000405093
3	A3	Genus	Paracoccus	6	0.000810187
3	A3	Genus	Hydrocarboniphaga	3	0.000405093
3	A3	Genus	Schlegelella	5	0.000675156
3	A3	Genus	Ancylobacter	29	0.0039159
3	A3	Genus	Gelidibacter	8	0.00108025
3	A3	Genus	Rheinheimera	1	0.000135031
3	A3	Genus	Hydrogenophilus	4	0.000540124
3	A3	Genus	Longilinea	1	0.000135031
3	A3	Genus	Phenylobacterium	6	0.000810187
3	A3	Genus	Desulfomonile	7	0.000945218
3	A3	Genus	Brenneria	16	0.0021605
3	A3	Genus	Desulfonatronum	4	0.000540124
3	A3	Genus	Pseudidiomarina	3	0.000405093
3	A3	Genus	Gluconobacter	3	0.000405093
3	A3	Genus	Herbaspirillum	2	0.000270062
3	A3	Genus	Euzebya	1	0.000135031
3	A3	Genus	Desulfovibrio	4	0.000540124
3	A3	Genus	Methylobacillus	2	0.000270062
3	A3	Genus	Thermicanus	1	0.000135031
3	A3	Genus	Psychrobacter	3	0.000405093
3	A3	Genus	Polaribacter	2	0.000270062
3	A3	Genus	Desulfotomaculum	1	0.000135031
3	A3	Genus	Amaricoccus	1	0.000135031
3	A3	Genus	Microbulbifer	8	0.00108025
3	A3	Genus	Vibrio	8	0.00108025
3	A3	Genus	Nannocystis	2	0.000270062
3	A3	Genus	Leuconostoc	1	0.000135031
3	A3	Genus	Treponema	1	0.000135031
3	A3	Genus	Lautropia	4	0.000540124
3	A3	Genus	Providencia	4	0.000540124
3	A3	Genus	Steroidobacter	1	0.000135031
3	A3	Genus	Caloramator	1	0.000135031
3	A3	Genus	Salinicoccus	4	0.000540124
3	A3	Genus	Candidatus Scalindua	10	0.00135031
3	A3	Genus	Negativicoccus	1	0.000135031
3	A3	Genus	Rickettsiella	1	0.000135031
3	A3	Genus	Thauera	1	0.000135031
3	A3	Genus	Kosmotoga	1	0.000135031
3	A3	Genus	Denitratisoma	6	0.000810187
3	A3	Genus	Waddlia	7	0.000945218
3	A3	Genus	Chromatium	1	0.000135031
3	A3	Genus	Pasteurella	1	0.000135031
3	A3	Genus	Gillisia	1	0.000135031
3	A3	Genus	Methylocella	3	0.000405093
3	A3	Genus	Alicycliphilus	2	0.000270062
3	A3	Genus	Caldicellulosiruptor	2	0.000270062
3	A3	Genus	Ehrlichia	2	0.000270062
3	A3	Genus	Dokdonella	1	0.000135031
3	A3	Genus	Arsenophonus	1	0.000135031
3	A3	Genus	Thiorhodococcus	1	0.000135031
3	A3	Genus	Alcanivorax	2	0.000270062
3	A3	Genus	Mycoplasma	3	0.000405093
3	A3	Genus	Dechloromonas	2	0.000270062
3	A3	Genus	Aurantimonas	1	0.000135031
3	A3	Genus	Candidatus Glomeribacter	1	0.000135031
3	A3	Genus	Ralstonia	3	0.000405093
3	A3	Genus	Glycomyces	2	0.000270062
3	A3	Genus	Lactobacillus	1	0.000135031
3	A3	Genus	Pelagicoccus	2	0.000270062
3	A3	Genus	Methylobacterium	3	0.000405093
3	A3	Genus	Maricaulis	2	0.000270062
3	A3	Genus	Candidatus Methylacidiphilum	1	0.000135031
3	A3	Genus	Halochromatium	1	0.000135031
3	A3	Genus	Thiocapsa	1	0.000135031
3	A3	Genus	Nitrosococcus	1	0.000135031
3	A3	Genus	Klebsiella	1	0.000135031
3	A3	Genus	Ramlibacter	3	0.000405093
3	A3	Genus	Thiorhodospira	1	0.000135031
3	A3	Genus	Morganella	1	0.000135031
3	A3	Genus	Trabulsiella	3	0.000405093
3	A3	Genus	Kushneria	1	0.000135031
3	A3	Genus	Acetobacterium	1	0.000135031
3	A3	Genus	Rhodoplanes	2	0.000270062
3	A3	Genus	Moritella	2	0.000270062
3	A3	Genus	Peptoniphilus	1	0.000135031
3	A3	Genus	Thermosipho	1	0.000135031
3	A3	Genus	Sporotomaculum	1	0.000135031
3	A3	Genus	Rhodothermus	1	0.000135031
3	A3	Genus	Caldilinea	2	0.000270062
3	A3	Genus	Crenothrix	1	0.000135031
3	A3	Genus	Bacillus	1	0.000135031
3	A3	Genus	Sporosarcina	1	0.000135031
3	A3	Genus	Xanthobacter	1	0.000135031
3	A3	Genus	Peptococcus	1	0.000135031
3	A3	Species	Unclassified	132749	17.9252
3	A3	Species	Candidatus Amoebophilus asiaticus	523840	70.7347
3	A3	Species	Escherichia albertii	1158	0.156366
3	A3	Species	Marinobacter arcticus	290	0.039159
3	A3	Species	Pectinatus cerevisiiphilus	1808	0.244136
3	A3	Species	Chitinophaga soli	9811	1.32479
3	A3	Species	Segetibacter aerophilus	38228	5.16197
3	A3	Species	Flavisolibacter ginsengisoli	978	0.13206
3	A3	Species	Hydrogenophaga defluvii	527	0.0711614
3	A3	Species	Pseudomonas brenneri	7187	0.970469
3	A3	Species	Arthrospira fusiformis	1585	0.214024
3	A3	Species	Rhodoferax ferrireducens	57	0.00769677
3	A3	Species	Rhodoferax antarcticus	1820	0.245757
3	A3	Species	Rickettsia limoniae	32	0.004321
3	A3	Species	Delftia lacustris	2394	0.323265
3	A3	Species	Megasphaera hominis	1136	0.153395
3	A3	Species	Candidatus Protochlamydia amoebophila	2575	0.347705
3	A3	Species	Pirellula staleyi	3239	0.437366
3	A3	Species	Stenotrophomonas geniculata	670	0.0904709
3	A3	Species	Stenotrophomonas pavanii	118	0.0159337
3	A3	Species	Rickettsia aeschlimannii	1	0.000135031
3	A3	Species	Acidovorax wohlfahrtii	950	0.12828
3	A3	Species	Pseudomonas moraviensis	311	0.0419947
3	A3	Species	Thiomonas perometabolis	13	0.00175541
3	A3	Species	Pseudomonas collierea	244	0.0329476
3	A3	Species	Comamonas kerstersii	68	0.00918212
3	A3	Species	Leptolyngbya laminosa	455	0.0614392
3	A3	Species	Pseudomonas corrugata	164	0.0221451
3	A3	Species	Brevundimonas staleyi	178	0.0240355
3	A3	Species	Nitrobacter hamburgensis	175	0.0236305
3	A3	Species	Elizabethkingia meningoseptica	1183	0.159742
3	A3	Species	Aquitalea denitrificans	241	0.0325425
3	A3	Species	Oxalobacter vibrioformis	1351	0.182427
3	A3	Species	Sphingobacterium shayense	374	0.0505016
3	A3	Species	Agrobacterium tumefaciens	71	0.00958721
3	A3	Species	Bifidobacterium bombi	22	0.00297068
3	A3	Species	Enterobacter hormaechei	522	0.0704863
3	A3	Species	Enterobacter amnigenus	564	0.0761576
3	A3	Species	Serratia entomophila	217	0.0293018
3	A3	Species	Cycloclasticus oligotrophus	116	0.0156636
3	A3	Species	Brevundimonas olei	20	0.00270062
3	A3	Species	Comamonas nitrativorans	83	0.0112076
3	A3	Species	Delftia tsuruhatensis	533	0.0719716
3	A3	Species	Thiomonas thermosulfata	2	0.000270062
3	A3	Species	Mesorhizobium septentrionale	12	0.00162037
3	A3	Species	Mesorhizobium huakuii	29	0.0039159
3	A3	Species	Pedobacter africanus	63	0.00850696
3	A3	Species	Acidovorax anthurii	31	0.00418596
3	A3	Species	Glaciecola nitratireducens	3	0.000405093
3	A3	Species	Desulfosporosinus hippei	3	0.000405093
3	A3	Species	Delftia acidovorans	21	0.00283565
3	A3	Species	Flavobacterium swingsii	326	0.0440202
3	A3	Species	Myroides odoratus	118	0.0159337
3	A3	Species	Chromobacterium subtsugae	4	0.000540124
3	A3	Species	Candidatus Blochmannia herculeanus	2	0.000270062
3	A3	Species	Mitsuaria chitosanitabida	35	0.00472609
3	A3	Species	Chlorobaculum limnaeum	1	0.000135031
3	A3	Species	Chryseobacterium indologenes	385	0.051987
3	A3	Species	Pedobacter koreensis	2	0.000270062
3	A3	Species	Chelatococcus daeguensis	5	0.000675156
3	A3	Species	Flavobacterium gelidilacus	127	0.0171489
3	A3	Species	Bradyrhizobium pachyrhizi	63	0.00850696
3	A3	Species	Bradyrhizobium jicamae	14	0.00189044
3	A3	Species	Streptomyces lazureus	2	0.000270062
3	A3	Species	Curvibacter gracilis	117	0.0157986
3	A3	Species	Pseudomonas teessidea	24	0.00324075
3	A3	Species	Nitrincola lacisaponensis	21	0.00283565
3	A3	Species	Francisella hispaniensis	4	0.000540124
3	A3	Species	Pelomonas puraquae	4	0.000540124
3	A3	Species	Rhodocyclus purpureus	1	0.000135031
3	A3	Species	Edaphobacter modestus	2	0.000270062
3	A3	Species	Pelotomaculum isophthalicicum	30	0.00405093
3	A3	Species	Planctomyces limnophilus	98	0.013233
3	A3	Species	Leptothrix discophora	48	0.00648149
3	A3	Species	Helicobacter mastomyrinus	1	0.000135031
3	A3	Species	Rhodobacter ovatus	38	0.00513118
3	A3	Species	Desulfurispirillum alkaliphilum	6	0.000810187
3	A3	Species	Clostridium frigoris	1	0.000135031
3	A3	Species	Thermodesulfovibrio thiophilus	3	0.000405093
3	A3	Species	Candidatus Rhabdochlamydia crassificans	4	0.000540124
3	A3	Species	Pseudomonas veronii	5	0.000675156
3	A3	Species	Stenotrophomonas maltophilia	7	0.000945218
3	A3	Species	Rhizobium alamii	1	0.000135031
3	A3	Species	Pseudomonas migulae	17	0.00229553
3	A3	Species	Azospirillum rugosum	2	0.000270062
3	A3	Species	Marichromatium gracile	1	0.000135031
3	A3	Species	Janthinobacterium agaricidamnosum	52	0.00702162
3	A3	Species	Gemmata obscuriglobus	4	0.000540124
3	A3	Species	Variovorax soli	6	0.000810187
3	A3	Species	Porphyromonas canis	4	0.000540124
3	A3	Species	Variovorax boronicumulans	29	0.0039159
3	A3	Species	Shinella yambaruensis	3	0.000405093
3	A3	Species	Rhodobacter apigmentum	19	0.00256559
3	A3	Species	Niabella soli	11	0.00148534
3	A3	Species	Bellilinea caldifistulae	17	0.00229553
3	A3	Species	Enterobacter aceae	11	0.00148534
3	A3	Species	Propionibacterium acnes	6	0.000810187
3	A3	Species	Enterobacter soli	15	0.00202547
3	A3	Species	Chromobacterium haemolyticum	2	0.000270062
3	A3	Species	Limnobacter thiooxidans	14	0.00189044
3	A3	Species	Enterobacter nickellidurans	5	0.000675156
3	A3	Species	Flavobacterium weaverense	2	0.000270062
3	A3	Species	Gallionella ferruginea	2	0.000270062
3	A3	Species	Luteimonas terricola	1	0.000135031
3	A3	Species	Achromobacter insolitus	5	0.000675156
3	A3	Species	Myroides injenensis	9	0.00121528
3	A3	Species	Ectothiorhodospira haloalkaliphila	2	0.000270062
3	A3	Species	Elizabethkingia anophelis	4	0.000540124
3	A3	Species	Pseudomonas fluorescens	3	0.000405093
3	A3	Species	Pseudomonas vancouverensis	3	0.000405093
3	A3	Species	Hyphomicrobium aestuarii	17	0.00229553
3	A3	Species	Chryseobacterium oranimense	1	0.000135031
3	A3	Species	Methylonatrum kenyense	1	0.000135031
3	A3	Species	Microvirus Enterobacteria phage PhiX174	26	0.00351081
3	A3	Species	Niastella koreensis	29	0.0039159
3	A3	Species	Flavobacterium suncheonense	2	0.000270062
3	A3	Species	Neorickettsia helminthoeca	6	0.000810187
3	A3	Species	Pseudomonas borealis	10	0.00135031
3	A3	Species	Stenotrophomonas retroflexus	18	0.00243056
3	A3	Species	Propionivibrio dicarboxylicus	1	0.000135031
3	A3	Species	Achromobacter arsenitoxydans	3	0.000405093
3	A3	Species	Thiohalorhabdus denitrificans	8	0.00108025
3	A3	Species	Comamonas composti	8	0.00108025
3	A3	Species	Niabella aurantiaca	1	0.000135031
3	A3	Species	Pseudomonas lini	1	0.000135031
3	A3	Species	Nitrobacter alkalicus	8	0.00108025
3	A3	Species	Tolumonas auensis	13	0.00175541
3	A3	Species	Campylobacter faecalis	6	0.000810187
3	A3	Species	Erwinia billingiae	4	0.000540124
3	A3	Species	Caulobacter crescentus	4	0.000540124
3	A3	Species	Devosia limi	8	0.00108025
3	A3	Species	Polaromonas vacuolata	5	0.000675156
3	A3	Species	Acidovorax temperans	2	0.000270062
3	A3	Species	Bradyrhizobium liaoningense	2	0.000270062
3	A3	Species	Azohydromonas australica	20	0.00270062
3	A3	Species	Sphingomonas roseiflava	1	0.000135031
3	A3	Species	Runella limosa	7	0.000945218
3	A3	Species	Achromobacter xylosoxidans	5	0.000675156
3	A3	Species	Isosphaera pallida	3	0.000405093
3	A3	Species	Hyphomicrobium sulfonivorans	6	0.000810187
3	A3	Species	Vogesella perlucida	5	0.000675156
3	A3	Species	Nitrobacter vulgaris	28	0.00378087
3	A3	Species	Variovorax dokdonensis	12	0.00162037
3	A3	Species	Helicobacter suncus	3	0.000405093
3	A3	Species	Halomonas almeriensis	3	0.000405093
3	A3	Species	Pedobacter cryoconitis	6	0.000810187
3	A3	Species	Luteibacter anthropi	3	0.000405093
3	A3	Species	Sphingobium abikonense	5	0.000675156
3	A3	Species	Escherichia coli	7	0.000945218
3	A3	Species	Paracoccus sulfuroxidans	5	0.000675156
3	A3	Species	Legionella cherrii	1	0.000135031
3	A3	Species	Cellvibrio japonicus	2	0.000270062
3	A3	Species	Schlegelella aquatica	5	0.000675156
3	A3	Species	Deinococcus soli	5	0.000675156
3	A3	Species	Rhodobacter gluconicum	2	0.000270062
3	A3	Species	Stenotrophomonas koreensis	3	0.000405093
3	A3	Species	Agrobacterium viscosum	13	0.00175541
3	A3	Species	Erwinia papayae	2	0.000270062
3	A3	Species	Pseudomonas cinnamophila	3	0.000405093
3	A3	Species	Shewanella pneumatophori	2	0.000270062
3	A3	Species	Pseudomonas coronafaciens	2	0.000270062
3	A3	Species	Rheinheimera texasensis	1	0.000135031
3	A3	Species	Longilinea arvoryzae	1	0.000135031
3	A3	Species	Pseudomonas lundensis	3	0.000405093
3	A3	Species	Desulfomonile tiedjei	7	0.000945218
3	A3	Species	Limnobacter litoralis	5	0.000675156
3	A3	Species	Pseudomonas proteolytica	2	0.000270062
3	A3	Species	Pseudomonas mucidolens	1	0.000135031
3	A3	Species	Desulfonatronum thiosulfatophilum	4	0.000540124
3	A3	Species	Herbaspirillum chlorophenolicum	1	0.000135031
3	A3	Species	Achromobacter piechaudii	6	0.000810187
3	A3	Species	Euzebya tangerina	1	0.000135031
3	A3	Species	Desulfovibrio psychrotolerans	4	0.000540124
3	A3	Species	Methylobacillus glycogenes	2	0.000270062
3	A3	Species	Chryseobacterium taichungense	2	0.000270062
3	A3	Species	Roseospira thiosulfatophila	1	0.000135031
3	A3	Species	Polaribacter butkevichii	2	0.000270062
3	A3	Species	Xanthomonas oryzae	3	0.000405093
3	A3	Species	Desulfotomaculum indicum	1	0.000135031
3	A3	Species	Herbaspirillum magnetovibrio	1	0.000135031
3	A3	Species	Amaricoccus kaplicensis	1	0.000135031
3	A3	Species	Sphingomonas oligophenolica	2	0.000270062
3	A3	Species	Sphingomonas melonis	3	0.000405093
3	A3	Species	Rickettsia monacensis	2	0.000270062
3	A3	Species	Gluconobacter krungthepensis	1	0.000135031
3	A3	Species	Pseudomonas pavonaceae	1	0.000135031
3	A3	Species	Microbulbifer okinawensis	7	0.000945218
3	A3	Species	Pseudomonas entomophila	1	0.000135031
3	A3	Species	Vibrio litoralis	8	0.00108025
3	A3	Species	Phenylobacterium lituiforme	2	0.000270062
3	A3	Species	Lautropia mirabilis	4	0.000540124
3	A3	Species	Legionella shakespearei	1	0.000135031
3	A3	Species	Steroidobacter denitrificans	1	0.000135031
3	A3	Species	Caloramator uzoniensis	1	0.000135031
3	A3	Species	Salinicoccus iranensis	4	0.000540124
3	A3	Species	Candidatus Scalindua brodae	10	0.00135031
3	A3	Species	Burkholderia ubonensis	6	0.000810187
3	A3	Species	Negativicoccus succinicivorans	1	0.000135031
3	A3	Species	Chryseobacterium isbiliense	2	0.000270062
3	A3	Species	Thauera terpenica	1	0.000135031
3	A3	Species	Pseudomonas umsongensis	2	0.000270062
[truncated: 8,278 more rows]

## Sheet: Figure 1-source data 1C
SampleNumber	SampleName	Level	Group	Reads	Percentage
1	X1	Kingdom	Unclassified	24095	2.77815
1	X1	Kingdom	Bacteria	843147	97.2148
1	X1	Kingdom	Viruses	61	0.0070333
1	X1	Phylum	Unclassified	25985	2.99607
1	X1	Phylum	Planctomycetes	79231	9.13533
1	X1	Phylum	Bacteroidetes	678551	78.2369
1	X1	Phylum	Proteobacteria	72071	8.30978
1	X1	Phylum	Firmicutes	4239	0.488756
1	X1	Phylum	Chlamydiae	4192	0.483337
1	X1	Phylum	Chloroflexi	418	0.0481954
1	X1	Phylum	Tenericutes	93	0.0107229
1	X1	Phylum	Actinobacteria	1261	0.145393
1	X1	Phylum	Nitrospirae	1150	0.132595
1	X1	Phylum	Cyanobacteria	19	0.0021907
1	X1	Phylum	DNA	61	0.0070333
1	X1	Phylum	Thermi	8	0.0009224
1	X1	Phylum	Verrucomicrobia	14	0.0016142
1	X1	Phylum	Thermotogae	2	0.0002306
1	X1	Phylum	Chrysiogenetes	4	0.0004612
1	X1	Phylum	Spirochaetes	2	0.0002306
1	X1	Phylum	Acidobacteria	1	0.0001153
1	X1	Phylum	Chlorobi	1	0.0001153
1	X1	Class	Unclassified	27762	3.20096
1	X1	Class	Planctomycetia	79175	9.12887
1	X1	Class	Sphingobacteriia	671441	77.4171
1	X1	Class	Betaproteobacteria	44073	5.08162
1	X1	Class	Gammaproteobacteria	19312	2.22667
1	X1	Class	Alphaproteobacteria	6637	0.765246
1	X1	Class	Flavobacteriia	6966	0.80318
1	X1	Class	Clostridia	4058	0.467887
1	X1	Class	Chlamydiia	4192	0.483337
1	X1	Class	Ktedonobacteria	407	0.0469271
1	X1	Class	Mollicutes	93	0.0107229
1	X1	Class	Actinobacteria	1259	0.145163
1	X1	Class	Deltaproteobacteria	406	0.0468118
1	X1	Class	Bacilli	175	0.0201775
1	X1	Class	Brocadiae	46	0.0053038
1	X1	Class	Nitrospira	1150	0.132595
1	X1	Class	Bacteroidia	12	0.0013836
1	X1	Class	Synechococcophycideae	8	0.0009224
1	X1	Class	Nitriliruptoria	1	0.0001153
1	X1	Class	Group II	61	0.0070333
1	X1	Class	Anaerolineae	11	0.0012683
1	X1	Class	Deinococci	8	0.0009224
1	X1	Class	Epsilonproteobacteria	19	0.0021907
1	X1	Class	Opitutae	10	0.001153
1	X1	Class	Nostocophycideae	3	0.0003459
1	X1	Class	Methylacidiphilae	4	0.0004612
1	X1	Class	Thermotogae	2	0.0002306
1	X1	Class	Chrysiogenetes	4	0.0004612
1	X1	Class	Spirochaetes	2	0.0002306
1	X1	Class	Oscillatoriophycideae	4	0.0004612
1	X1	Class	Acidobacteria	1	0.0001153
1	X1	Class	Chlorobia	1	0.0001153
1	X1	Order	Unclassified	29124	3.358
1	X1	Order	Gemmatales	66730	7.69397
1	X1	Order	Sphingobacteriales	671441	77.4171
1	X1	Order	Burkholderiales	42286	4.87557
1	X1	Order	Pirellulales	12316	1.42003
1	X1	Order	Pseudomonadales	14052	1.6202
1	X1	Order	Rhizobiales	1423	0.164072
1	X1	Order	Flavobacteriales	6966	0.80318
1	X1	Order	Alteromonadales	456	0.0525768
1	X1	Order	Clostridiales	3509	0.404588
1	X1	Order	Thiotrichales	1237	0.142626
1	X1	Order	Chlamydiales	4192	0.483337
1	X1	Order	Thermogemmatisporales	407	0.0469271
1	X1	Order	Rickettsiales	1510	0.174103
1	X1	Order	Caulobacterales	3205	0.369536
1	X1	Order	Acholeplasmatales	85	0.0098005
1	X1	Order	Sphingomonadales	67	0.0077251
1	X1	Order	Actinomycetales	1118	0.128905
1	X1	Order	Enterobacteriales	2369	0.273146
1	X1	Order	Bdellovibrionales	368	0.0424304
1	X1	Order	Neisseriales	1104	0.127291
1	X1	Order	Bacillales	154	0.0177562
1	X1	Order	Brocadiales	46	0.0053038
1	X1	Order	Rhodobacterales	44	0.0050732
1	X1	Order	Nitrospirales	1150	0.132595
1	X1	Order	Rhodospirillales	355	0.0409315
1	X1	Order	Bifidobacteriales	139	0.0160267
1	X1	Order	Bacteroidales	12	0.0013836
1	X1	Order	Xanthomonadales	893	0.102963
1	X1	Order	Pseudanabaenales	8	0.0009224
1	X1	Order	Euzebyales	1	0.0001153
1	X1	Order	(Microviridae)	61	0.0070333
1	X1	Order	Legionellales	33	0.0038049
1	X1	Order	Aeromonadales	15	0.0017295
1	X1	Order	Oceanospirillales	80	0.009224
1	X1	Order	Rhodocyclales	18	0.0020754
1	X1	Order	Desulfovibrionales	14	0.0016142
1	X1	Order	Thermoanaerobacterales	64	0.0073792
1	X1	Order	Caldilineales	1	0.0001153
1	X1	Order	Planctomycetales	86	0.0099158
1	X1	Order	Vibrionales	10	0.001153
1	X1	Order	Anaerolineales	10	0.001153
1	X1	Order	Thermales	3	0.0003459
1	X1	Order	Syntrophobacterales	17	0.0019601
1	X1	Order	Lactobacillales	17	0.0019601
1	X1	Order	Campylobacterales	19	0.0021907
1	X1	Order	Myxococcales	1	0.0001153
1	X1	Order	Gallionellales	1	0.0001153
1	X1	Order	Pelagicoccales	10	0.001153
1	X1	Order	Nostocales	3	0.0003459
1	X1	Order	Methylacidiphilales	4	0.0004612
1	X1	Order	Thermotogales	2	0.0002306
1	X1	Order	Chromatiales	34	0.0039202
1	X1	Order	Mycoplasmatales	7	0.0008071
1	X1	Order	Chrysiogenales	4	0.0004612
1	X1	Order	Borreliales	2	0.0002306
1	X1	Order	Methylophilales	2	0.0002306
1	X1	Order	Deinococcales	5	0.0005765
1	X1	Order	Entomoplasmatales	1	0.0001153
1	X1	Order	Chroococcales	4	0.0004612
1	X1	Order	Thiohalorhabdales	3	0.0003459
1	X1	Order	Thermicanales	3	0.0003459
1	X1	Order	Acidobacteriales	1	0.0001153
1	X1	Order	Chlorobiales	1	0.0001153
1	X1	Family	Unclassified	46555	5.36779
1	X1	Family	Gemmataceae	66071	7.61798
1	X1	Family	Amoebophilaceae	572776	66.041
1	X1	Family	Comamonadaceae	36251	4.17974
1	X1	Family	Pirellulaceae	12316	1.42003
1	X1	Family	Chitinophagaceae	77245	8.90634
1	X1	Family	Pseudomonadaceae	14040	1.61881
1	X1	Family	Rhizobiaceae	710	0.081863
1	X1	Family	Sphingobacteriaceae	4250	0.490025
1	X1	Family	Oxalobacteraceae	5732	0.660899
1	X1	Family	Flavobacteriaceae	6966	0.80318
1	X1	Family	Alteromonadaceae	373	0.0430069
1	X1	Family	Veillonellaceae	3388	0.390636
1	X1	Family	Piscirickettsiaceae	1236	0.142511
1	X1	Family	Parachlamydiaceae	4081	0.470539
1	X1	Family	Thermogemmatisporaceae	407	0.0469271
1	X1	Family	Alcaligenaceae	142	0.0163726
1	X1	Family	Rickettsiaceae	1483	0.17099
1	X1	Family	Caulobacteraceae	3205	0.369536
1	X1	Family	Acholeplasmataceae	85	0.0098005
1	X1	Family	Sphingomonadaceae	66	0.0076098
1	X1	Family	Isosphaeraceae	633	0.0729849
1	X1	Family	Propionibacteriaceae	135	0.0155655
1	X1	Family	Enterobacteriaceae	2369	0.273146
1	X1	Family	Corynebacteriaceae	488	0.0562664
1	X1	Family	Bdellovibrionaceae	368	0.0424304
1	X1	Family	Neisseriaceae	1104	0.127291
1	X1	Family	Staphylococcaceae	146	0.0168338
1	X1	Family	Hyphomicrobiaceae	526	0.0606478
1	X1	Family	Brocadiaceae	46	0.0053038
1	X1	Family	Rhodobacteraceae	37	0.0042661
1	X1	Family	Nitrospiraceae	1137	0.131096
1	X1	Family	Rhodospirillaceae	334	0.0385102
1	X1	Family	Bifidobacteriaceae	139	0.0160267
1	X1	Family	Porphyromonadaceae	11	0.0012683
1	X1	Family	Phyllobacteriaceae	96	0.0110688
1	X1	Family	Bacteroidaceae	1	0.0001153
1	X1	Family	Microbacteriaceae	448	0.0516544
1	X1	Family	Xanthomonadaceae	874	0.100772
1	X1	Family	Pseudanabaenaceae	8	0.0009224
1	X1	Family	Thermodesulfovibrionaceae	13	0.0014989
1	X1	Family	Peptococcaceae	45	0.0051885
1	X1	Family	Euzebyaceae	1	0.0001153
1	X1	Family	Microviridae	61	0.0070333
1	X1	Family	Francisellaceae	11	0.0012683
1	X1	Family	Burkholderiaceae	51	0.0058803
1	X1	Family	Sinobacteraceae	17	0.0019601
1	X1	Family	Shewanellaceae	64	0.0073792
1	X1	Family	Aeromonadaceae	15	0.0017295
1	X1	Family	Halomonadaceae	26	0.0029978
1	X1	Family	Rhodocyclaceae	18	0.0020754
1	X1	Family	Desulfonatronumaceae	9	0.0010377
1	X1	Family	Flexibacteraceae	34	0.0039202
1	X1	Family	Anaplasmataceae	26	0.0029978
1	X1	Family	Acetobacteraceae	20	0.002306
1	X1	Family	Caldilineaceae	1	0.0001153
1	X1	Family	Xanthobacteraceae	35	0.0040355
1	X1	Family	Planctomycetaceae	86	0.0099158
1	X1	Family	Vibrionaceae	10	0.001153
1	X1	Family	Anaerolinaceae	10	0.001153
1	X1	Family	Thermaceae	3	0.0003459
1	X1	Family	Syntrophaceae	13	0.0014989
1	X1	Family	Legionellaceae	16	0.0018448
1	X1	Family	Oceanospirillaceae	25	0.0028825
1	X1	Family	Streptomycetaceae	7	0.0008071
1	X1	Family	Desulfovibrionaceae	5	0.0005765
1	X1	Family	Bacillaceae	7	0.0008071
1	X1	Family	Saprospiraceae	32	0.0036896
1	X1	Family	Nannocystaceae	1	0.0001153
1	X1	Family	Campylobacteraceae	9	0.0010377
1	X1	Family	Thermoanaerobacteraceae	58	0.0066874
1	X1	Family	Gallionellaceae	1	0.0001153
1	X1	Family	Methylobacteriaceae	10	0.001153
1	X1	Family	Clostridiaceae	9	0.0010377
1	X1	Family	Litoricolaceae	23	0.0026519
1	X1	Family	Pelagicoccaceae	10	0.001153
1	X1	Family	Rhabdochlamydiaceae	56	0.0064568
1	X1	Family	Waddliaceae	19	0.0021907
1	X1	Family	Cellulomonadaceae	2	0.0002306
1	X1	Family	Pseudoalteromonadaceae	15	0.0017295
1	X1	Family	Desulfobacteraceae	3	0.0003459
1	X1	Family	Chromatiaceae	4	0.0004612
1	X1	Family	Lachnospiraceae	13	0.0014989
1	X1	Family	Coxiellaceae	6	0.0006918
1	X1	Family	Pseudonocardiaceae	1	0.0001153
1	X1	Family	Syntrophobacteraceae	1	0.0001153
1	X1	Family	Nostocaceae	3	0.0003459
1	X1	Family	Helicobacteraceae	8	0.0009224
1	X1	Family	Alcanivoracaceae	1	0.0001153
1	X1	Family	Nocardioidaceae	2	0.0002306
1	X1	Family	Methylacidiphilaceae	4	0.0004612
1	X1	Family	Moraxellaceae	9	0.0010377
1	X1	Family	Thermotogaceae	2	0.0002306
1	X1	Family	Ectothiorhodospiraceae	30	0.003459
1	X1	Family	Mycoplasmataceae	7	0.0008071
1	X1	Family	Chrysiogenaceae	4	0.0004612
1	X1	Family	Bradyrhizobiaceae	6	0.0006918
1	X1	Family	Borreliaceae	2	0.0002306
1	X1	Family	Caldicellulosiruptoraceae	3	0.0003459
1	X1	Family	Methylophilaceae	2	0.0002306
1	X1	Family	Deinococcaceae	5	0.0005765
1	X1	Family	Entomoplasmataceae	1	0.0001153
1	X1	Family	Bartonellaceae	2	0.0002306
1	X1	Family	Methylocystaceae	7	0.0008071
1	X1	Family	Erythrobacteraceae	1	0.0001153
1	X1	Family	Chroococcaceae	2	0.0002306
1	X1	Family	Idiomarinaceae	2	0.0002306
1	X1	Family	Saccharospirillaceae	3	0.0003459
1	X1	Family	Thiotrichaceae	1	0.0001153
1	X1	Family	Planococcaceae	1	0.0001153
1	X1	Family	Thiohalorhabdaceae	3	0.0003459
1	X1	Family	Phormidiaceae	1	0.0001153
1	X1	Family	Hyphomonadaceae	3	0.0003459
1	X1	Family	Thermicanaceae	3	0.0003459
1	X1	Family	Acidobacteriaceae	1	0.0001153
1	X1	Family	Peptostreptococcaceae	1	0.0001153
1	X1	Family	Brucellaceae	1	0.0001153
1	X1	Family	Eubacteriaceae	1	0.0001153
1	X1	Family	Chlorobiaceae	1	0.0001153
1	X1	Genus	Unclassified	77509	8.93679
1	X1	Genus	Gemmata	66071	7.61798
1	X1	Genus	Candidatus Amoebophilus	572776	66.041
1	X1	Genus	Pirellula	12316	1.42003
1	X1	Genus	Chitinophaga	15453	1.78173
1	X1	Genus	Pseudomonas	14040	1.61881
1	X1	Genus	Segetibacter	55952	6.45126
1	X1	Genus	Agrobacterium	663	0.0764439
1	X1	Genus	Pedobacter	3688	0.425226
1	X1	Genus	Shinella	16	0.0018448
1	X1	Genus	Acidovorax	943	0.108728
1	X1	Genus	Rhodoferax	1984	0.228755
1	X1	Genus	Giesbergeria	2119	0.244321
1	X1	Genus	Oxalobacter	5429	0.625963
1	X1	Genus	Janthinobacterium	200	0.02306
1	X1	Genus	Elizabethkingia	5123	0.590682
1	X1	Genus	Chryseobacterium	504	0.0581112
1	X1	Genus	Marinobacter	369	0.0425457
1	X1	Genus	Delftia	4859	0.560242
1	X1	Genus	Megasphaera	1749	0.20166
1	X1	Genus	Methylophaga	1236	0.142511
1	X1	Genus	Candidatus Protochlamydia	4081	0.470539
1	X1	Genus	Thermogemmatispora	407	0.0469271
1	X1	Genus	Olivibacter	38	0.0043814
1	X1	Genus	Achromobacter	129	0.0148737
1	X1	Genus	Rickettsia	1483	0.17099
1	X1	Genus	Arthrospira	2447	0.282139
1	X1	Genus	Pectinatus	1638	0.188861
1	X1	Genus	Candidatus Phytoplasma	85	0.0098005
1	X1	Genus	Sphingobacterium	489	0.0563817
1	X1	Genus	Flavisolibacter	973	0.112187
1	X1	Genus	Brevundimonas	217	0.0250201
1	X1	Genus	Hydrogenophaga	549	0.0632997
1	X1	Genus	Sphingobium	12	0.0013836
1	X1	Genus	Singulisphaera	627	0.0722931
1	X1	Genus	Propionibacterium	134	0.0154502
1	X1	Genus	Enterobacter	2143	0.247088
1	X1	Genus	Bizionia	1	0.0001153
1	X1	Genus	Corynebacterium	488	0.0562664
1	X1	Genus	Curvibacter	634	0.0731002
1	X1	Genus	Myroides	296	0.0341288
1	X1	Genus	Flavobacterium	583	0.0672199
1	X1	Genus	Bdellovibrio	368	0.0424304
1	X1	Genus	Aquitalea	271	0.0312463
1	X1	Genus	Macrococcus	126	0.0145278
1	X1	Genus	Limnohabitans	73	0.0084169
1	X1	Genus	Hyphomicrobium	475	0.0547675
1	X1	Genus	Comamonas	142	0.0163726
1	X1	Genus	Candidatus Scalindua	46	0.0053038
1	X1	Genus	Paucibacter	110	0.012683
1	X1	Genus	Amaricoccus	2	0.0002306
1	X1	Genus	Nitrospira	1137	0.131096
1	X1	Genus	Chromobacterium	746	0.0860138
1	X1	Genus	Roseospira	261	0.0300933
1	X1	Genus	Bifidobacterium	139	0.0160267
1	X1	Genus	Porphyromonas	10	0.001153
1	X1	Genus	Chelativorans	88	0.0101464
1	X1	Genus	Polaromonas	13	0.0014989
1	X1	Genus	Bacteroides	1	0.0001153
1	X1	Genus	Microbacterium	14	0.0016142
1	X1	Genus	Agromyces	154	0.0177562
1	X1	Genus	Cryocola	241	0.0277873
1	X1	Genus	Stenotrophomonas	830	0.095699
1	X1	Genus	Leptolyngbya	6	0.0006918
1	X1	Genus	Thermodesulfovibrio	13	0.0014989
1	X1	Genus	Pelotomaculum	40	0.004612
1	X1	Genus	Euzebya	1	0.0001153
1	X1	Genus	Microvirus	61	0.0070333
1	X1	Genus	Luteibacter	23	0.0026519
1	X1	Genus	Francisella	11	0.0012683
1	X1	Genus	Burkholderia	37	0.0042661
1	X1	Genus	Hydrocarboniphaga	17	0.0019601
1	X1	Genus	Variovorax	40	0.004612
1	X1	Genus	Brenneria	16	0.0018448
1	X1	Genus	Shewanella	64	0.0073792
1	X1	Genus	Klebsiella	4	0.0004612
1	X1	Genus	Tolumonas	15	0.0017295
1	X1	Genus	Denitratisoma	6	0.0006918
1	X1	Genus	Desulfonatronum	9	0.0010377
1	X1	Genus	Hymenobacter	15	0.0017295
1	X1	Genus	Neorickettsia	20	0.002306
1	X1	Genus	Acidiphilium	13	0.0014989
1	X1	Genus	Thiomonas	16	0.0018448
1	X1	Genus	Rhodobacter	24	0.0027672
1	X1	Genus	Isosphaera	2	0.0002306
1	X1	Genus	Runella	15	0.0017295
1	X1	Genus	Caldilinea	1	0.0001153
1	X1	Genus	Kushneria	9	0.0010377
1	X1	Genus	Azospirillum	23	0.0026519
1	X1	Genus	Labrys	1	0.0001153
1	X1	Genus	Planctomyces	86	0.0099158
1	X1	Genus	Vibrio	9	0.0010377
1	X1	Genus	Haloanella	1	0.0001153
1	X1	Genus	Mesorhizobium	3	0.0003459
1	X1	Genus	Bellilinea	9	0.0010377
1	X1	Genus	Sphingomonas	35	0.0040355
1	X1	Genus	Ralstonia	20	0.002306
1	X1	Genus	Thermus	3	0.0003459
1	X1	Genus	Desulfomonile	13	0.0014989
1	X1	Genus	Candidatus Blochmannia	19	0.0021907
1	X1	Genus	Legionella	16	0.0018448
1	X1	Genus	Marinospirillum	7	0.0008071
1	X1	Genus	Salinivibrio	1	0.0001153
1	X1	Genus	Niabella	42	0.0048426
1	X1	Genus	Oligella	2	0.0002306
1	X1	Genus	Streptomyces	7	0.0008071
1	X1	Genus	Marinomonas	14	0.0016142
1	X1	Genus	Halomonas	10	0.001153
1	X1	Genus	Desulfovibrio	5	0.0005765
1	X1	Genus	Bacillus	6	0.0006918
1	X1	Genus	Candidatus Liberibacter	14	0.0016142
1	X1	Genus	Limnobacter	14	0.0016142
1	X1	Genus	Lewinella	32	0.0036896
1	X1	Genus	Gillisia	3	0.0003459
1	X1	Genus	Nannocystis	1	0.0001153
1	X1	Genus	Campylobacter	9	0.0010377
1	X1	Genus	Thermoanaerobacter	53	0.0061109
1	X1	Genus	Gallionella	1	0.0001153
1	X1	Genus	Methylobacterium	10	0.001153
1	X1	Genus	Lautropia	10	0.001153
1	X1	Genus	Rhodospirillum	31	0.0035743
1	X1	Genus	Stenoxybacter	3	0.0003459
1	X1	Genus	Arsenophonus	2	0.0002306
1	X1	Genus	Alkaliphilus	3	0.0003459
1	X1	Genus	Polynucleobacter	16	0.0018448
1	X1	Genus	Litoricola	23	0.0026519
1	X1	Genus	Ehrlichia	6	0.0006918
1	X1	Genus	Dokdonella	3	0.0003459
1	X1	Genus	Pelagicoccus	10	0.001153
1	X1	Genus	Candidatus Rhabdochlamydia	56	0.0064568
1	X1	Genus	Vogesella	36	0.0041508
1	X1	Genus	Clostridium	7	0.0008071
1	X1	Genus	Waddlia	19	0.0021907
1	X1	Genus	Demequina	2	0.0002306
1	X1	Genus	Pseudoalteromonas	15	0.0017295
1	X1	Genus	Pseudaminobacter	2	0.0002306
1	X1	Genus	Rhodoplanes	48	0.0055344
1	X1	Genus	Niastella	17	0.0019601
1	X1	Genus	Xanthomonas	7	0.0008071
1	X1	Genus	Gramella	2	0.0002306
1	X1	Genus	Ancylobacter	34	0.0039202
1	X1	Genus	Desulfosarcina	3	0.0003459
1	X1	Genus	Alishewanella	1	0.0001153
1	X1	Genus	Staphylococcus	1	0.0001153
1	X1	Genus	Desulfurispora	1	0.0001153
1	X1	Genus	Leptothrix	19	0.0021907
1	X1	Genus	Lachnospira	11	0.0012683
1	X1	Genus	Propionivibrio	1	0.0001153
1	X1	Genus	Tepidimonas	4	0.0004612
1	X1	Genus	Caulobacter	5	0.0005765
1	X1	Genus	Coxiella	1	0.0001153
1	X1	Genus	Uliginosibacterium	1	0.0001153
1	X1	Genus	Desulfosporosinus	2	0.0002306
1	X1	Genus	Saccharomonospora	1	0.0001153
1	X1	Genus	Helicobacter	8	0.0009224
1	X1	Genus	Alcanivorax	1	0.0001153
1	X1	Genus	Polaribacter	6	0.0006918
1	X1	Genus	Asticcacaulis	4	0.0004612
1	X1	Genus	Kribbella	2	0.0002306
1	X1	Genus	Candidatus Methylacidiphilum	4	0.0004612
1	X1	Genus	Acinetobacter	1	0.0001153
1	X1	Genus	Fervidobacterium	1	0.0001153
1	X1	Genus	Phaeobacter	2	0.0002306
1	X1	Genus	Ectothiorhodospira	21	0.0024213
1	X1	Genus	Psychrobacter	8	0.0009224
1	X1	Genus	Mycoplasma	7	0.0008071
1	X1	Genus	Salinicoccus	13	0.0014989
1	X1	Genus	Desulfurispirillum	4	0.0004612
1	X1	Genus	Nitrobacter	1	0.0001153
1	X1	Genus	Borrelia	2	0.0002306
1	X1	Genus	Rhizobium	7	0.0008071
1	X1	Genus	Bradyrhizobium	5	0.0005765
1	X1	Genus	Trabulsiella	10	0.001153
1	X1	Genus	Phenylobacterium	3	0.0003459
1	X1	Genus	Dickeya	1	0.0001153
1	X1	Genus	Denitrobacter	1	0.0001153
1	X1	Genus	Methylonatrum	2	0.0002306
1	X1	Genus	Caldicellulosiruptor	3	0.0003459
1	X1	Genus	Methylobacillus	2	0.0002306
1	X1	Genus	Deinococcus	5	0.0005765
1	X1	Genus	Deefgea	2	0.0002306
1	X1	Genus	Mesoplasma	1	0.0001153
1	X1	Genus	Bartonella	2	0.0002306
1	X1	Genus	Leucobacter	6	0.0006918
1	X1	Genus	Methylibium	7	0.0008071
1	X1	Genus	Methylosinus	4	0.0004612
1	X1	Genus	Agrococcus	1	0.0001153
1	X1	Genus	Paracoccus	3	0.0003459
1	X1	Genus	Sporotomaculum	1	0.0001153
1	X1	Genus	Tenacibaculum	8	0.0009224
1	X1	Genus	Thiocapsa	3	0.0003459
1	X1	Genus	Erythrobacter	1	0.0001153
1	X1	Genus	Azohydromonas	2	0.0002306
1	X1	Genus	Gluconobacter	5	0.0005765
1	X1	Genus	Chroococcus	2	0.0002306
1	X1	Genus	Thiorhodospira	4	0.0004612
1	X1	Genus	Pseudidiomarina	2	0.0002306
1	X1	Genus	Negativicoccus	1	0.0001153
1	X1	Genus	Saccharospirillum	3	0.0003459
1	X1	Genus	Hydrogenophilus	4	0.0004612
1	X1	Genus	Thiothrix	1	0.0001153
1	X1	Genus	Erwinia	5	0.0005765
1	X1	Genus	Dechloromonas	4	0.0004612
1	X1	Genus	Sporosarcina	1	0.0001153
1	X1	Genus	Tepidanaerobacter	2	0.0002306
1	X1	Genus	Thiohalorhabdus	3	0.0003459
1	X1	Genus	Luteimonas	3	0.0003459
1	X1	Genus	Longilinea	1	0.0001153
1	X1	Genus	Microcoleus	1	0.0001153
1	X1	Genus	Candidatus Endobugula	2	0.0002306
1	X1	Genus	Bergeyella	1	0.0001153
1	X1	Genus	Herbaspirillum	2	0.0002306
1	X1	Genus	Pandoraea	1	0.0001153
1	X1	Genus	Methylopila	2	0.0002306
1	X1	Genus	Rhodovibrio	3	0.0003459
1	X1	Genus	Thauera	1	0.0001153
1	X1	Genus	Maricaulis	1	0.0001153
1	X1	Genus	Zhouia	1	0.0001153
1	X1	Genus	Virgibacillus	1	0.0001153
1	X1	Genus	Sutterella	1	0.0001153
1	X1	Genus	Petrotoga	1	0.0001153
1	X1	Genus	Dyadobacter	1	0.0001153
1	X1	Genus	Serratia	1	0.0001153
1	X1	Genus	Thermicanus	3	0.0003459
1	X1	Genus	Hyphomonas	2	0.0002306
1	X1	Genus	Magnetospirillum	1	0.0001153
1	X1	Genus	Microbulbifer	2	0.0002306
1	X1	Genus	Edaphobacter	1	0.0001153
1	X1	Genus	Rickettsiella	5	0.0005765
1	X1	Genus	Ochrobactrum	1	0.0001153
1	X1	Genus	Pedomicrobium	1	0.0001153
1	X1	Genus	Providencia	1	0.0001153
1	X1	Genus	Sphingopyxis	1	0.0001153
1	X1	Genus	Emticicia	2	0.0002306
1	X1	Genus	Curtobacterium	1	0.0001153
1	X1	Genus	Candidatus Glomeribacter	1	0.0001153
1	X1	Genus	Dysgonomonas	1	0.0001153
1	X1	Genus	Acetobacterium	1	0.0001153
1	X1	Genus	Skermanella	1	0.0001153
1	X1	Genus	Blautia	1	0.0001153
1	X1	Genus	Chlorobaculum	1	0.0001153
1	X1	Species	Unclassified	159850	18.4307
1	X1	Species	Candidatus Amoebophilus asiaticus	572776	66.041
1	X1	Species	Pirellula staleyi	12165	1.40262
1	X1	Species	Chitinophaga soli	15451	1.7815
1	X1	Species	Pseudomonas brenneri	12093	1.39432
1	X1	Species	Segetibacter aerophilus	55952	6.45126
1	X1	Species	Agrobacterium tumefaciens	395	0.0455435
1	X1	Species	Shinella fusca	2	0.0002306
1	X1	Species	Acidovorax wohlfahrtii	583	0.0672199
1	X1	Species	Oxalobacter vibrioformis	5429	0.625963
1	X1	Species	Janthinobacterium agaricidamnosum	200	0.02306
1	X1	Species	Elizabethkingia meningoseptica	5106	0.588722
1	X1	Species	Pseudomonas collierea	351	0.0404703
1	X1	Species	Chryseobacterium indologenes	252	0.0290556
1	X1	Species	Marinobacter arcticus	359	0.0413927
1	X1	Species	Delftia lacustris	4042	0.466042
1	X1	Species	Megasphaera hominis	1749	0.20166
1	X1	Species	Candidatus Protochlamydia amoebophila	4042	0.466042
1	X1	Species	Pseudomonas moraviensis	472	0.0544216
1	X1	Species	Achromobacter piechaudii	19	0.0021907
1	X1	Species	Rickettsia limoniae	1035	0.119335
1	X1	Species	Arthrospira fusiformis	1943	0.224028
1	X1	Species	Pectinatus cerevisiiphilus	1638	0.188861
1	X1	Species	Sphingobacterium shayense	489	0.0563817
1	X1	Species	Flavisolibacter ginsengisoli	973	0.112187
1	X1	Species	Brevundimonas staleyi	148	0.0170644
1	X1	Species	Hydrogenophaga defluvii	548	0.0631844
1	X1	Species	Rhodoferax antarcticus	1353	0.156001
1	X1	Species	Propionibacterium humerusii	83	0.0095699
1	X1	Species	Enterobacter amnigenus	484	0.0558052
1	X1	Species	Enterobacter hormaechei	1534	0.17687
1	X1	Species	Pseudomonas borealis	10	0.001153
1	X1	Species	Rickettsia aeschlimannii	66	0.0076098
1	X1	Species	Bizionia saleffrena	1	0.0001153
1	X1	Species	Corynebacterium tuberculostearicum	190	0.021907
1	X1	Species	Curvibacter lanceolatus	477	0.0549981
1	X1	Species	Myroides odoratus	282	0.0325146
1	X1	Species	Flavobacterium swingsii	531	0.0612243
1	X1	Species	Aquitalea denitrificans	271	0.0312463
1	X1	Species	Hyphomicrobium aestuarii	38	0.0043814
1	X1	Species	Agrobacterium viscosum	35	0.0040355
1	X1	Species	Candidatus Scalindua brodae	46	0.0053038
1	X1	Species	Amaricoccus kaplicensis	1	0.0001153
1	X1	Species	Rhodoferax ferrireducens	78	0.0089934
1	X1	Species	Nitrospira moscoviensis	77	0.0088781
1	X1	Species	Pseudomonas teessidea	49	0.0056497
1	X1	Species	Corynebacterium fastidiosum	4	0.0004612
1	X1	Species	Bifidobacterium bombi	134	0.0154502
1	X1	Species	Porphyromonas canis	10	0.001153
1	X1	Species	Acidovorax delafieldii	229	0.0264037
1	X1	Species	Curvibacter gracilis	134	0.0154502
1	X1	Species	Comamonas kerstersii	58	0.0066874
1	X1	Species	Microbacterium aquimaris	6	0.0006918
1	X1	Species	Agromyces salentinus	80	0.009224
1	X1	Species	Agromyces subbeticus	14	0.0016142
1	X1	Species	Stenotrophomonas geniculata	592	0.0682576
1	X1	Species	Stenotrophomonas pavanii	88	0.0101464
1	X1	Species	Comamonas nitrativorans	32	0.0036896
1	X1	Species	Leptolyngbya laminosa	6	0.0006918
1	X1	Species	Pelotomaculum isophthalicicum	40	0.004612
1	X1	Species	Delftia acidovorans	26	0.0029978
1	X1	Species	Delftia tsuruhatensis	516	0.0594948
1	X1	Species	Chryseobacterium oranimense	3	0.0003459
1	X1	Species	Stenotrophomonas maltophilia	2	0.0002306
1	X1	Species	Euzebya tangerina	1	0.0001153
1	X1	Species	Microvirus Enterobacteria phage PhiX174	61	0.0070333
1	X1	Species	Luteibacter anthropi	23	0.0026519
1	X1	Species	Francisella hispaniensis	11	0.0012683
1	X1	Species	Achromobacter insolitus	6	0.0006918
1	X1	Species	Agromyces ramosus	28	0.0032284
1	X1	Species	Variovorax boronicumulans	35	0.0040355
1	X1	Species	Brevundimonas olei	28	0.0032284
1	X1	Species	Shewanella pneumatophori	2	0.0002306
1	X1	Species	Klebsiella granulomatis	3	0.0003459
1	X1	Species	Tolumonas auensis	15	0.0017295
1	X1	Species	Pseudomonas parafulva	150	0.017295
1	X1	Species	Pseudomonas marginalis	24	0.0027672
1	X1	Species	Pseudomonas veronii	6	0.0006918
1	X1	Species	Denitratisoma oestradiolicum	6	0.0006918
1	X1	Species	Pseudomonas umsongensis	3	0.0003459
1	X1	Species	Shinella yambaruensis	12	0.0013836
1	X1	Species	Pedobacter africanus	52	0.0059956
1	X1	Species	Desulfonatronum thiosulfatophilum	9	0.0010377
1	X1	Species	Pseudomonas lini	3	0.0003459
1	X1	Species	Neorickettsia helminthoeca	20	0.002306
1	X1	Species	Acidiphilium angustum	5	0.0005765
1	X1	Species	Rhodobacter apigmentum	8	0.0009224
1	X1	Species	Corynebacterium accolens	9	0.0010377
1	X1	Species	Isosphaera pallida	2	0.0002306
1	X1	Species	Enterobacter soli	18	0.0020754
1	X1	Species	Runella limosa	15	0.0017295
1	X1	Species	Caldilinea tarbellica	1	0.0001153
1	X1	Species	Chryseobacterium isbiliense	13	0.0014989
1	X1	Species	Kushneria aurantia	9	0.0010377
1	X1	Species	Azospirillum rugosum	4	0.0004612
1	X1	Species	Planctomyces limnophilus	86	0.0099158
1	X1	Species	Vibrio litoralis	7	0.0008071
1	X1	Species	Haloanella gallinarum	1	0.0001153
1	X1	Species	Mesorhizobium camelthorni	3	0.0003459
1	X1	Species	Bellilinea caldifistulae	9	0.0010377
1	X1	Species	Ralstonia insidiosa	18	0.0020754
1	X1	Species	Corynebacterium pseudogenitalium	4	0.0004612
1	X1	Species	Pseudomonas tremae	6	0.0006918
1	X1	Species	Desulfomonile tiedjei	13	0.0014989
1	X1	Species	Candidatus Blochmannia castaneus	13	0.0014989
1	X1	Species	Legionella shakespearei	2	0.0002306
1	X1	Species	Burkholderia ubonensis	13	0.0014989
1	X1	Species	Salinivibrio budaii	1	0.0001153
1	X1	Species	Niabella soli	30	0.003459
1	X1	Species	Flavobacterium branchiophilum	1	0.0001153
1	X1	Species	Oligella ureolytica	2	0.0002306
1	X1	Species	Acidovorax valerianellae	1	0.0001153
1	X1	Species	Hyphomicrobium sulfonivorans	10	0.001153
1	X1	Species	Pseudomonas migulae	23	0.0026519
1	X1	Species	Streptomyces lazureus	7	0.0008071
1	X1	Species	Methylophaga lonarensis	3	0.0003459
1	X1	Species	Acidovorax temperans	26	0.0029978
1	X1	Species	Bacillus mucilaginosus	3	0.0003459
1	X1	Species	Sphingomonas leidyia	16	0.0018448
1	X1	Species	Comamonas odontotermitis	4	0.0004612
1	X1	Species	Limnobacter litoralis	10	0.001153
1	X1	Species	Lewinella marina	17	0.0019601
1	X1	Species	Elizabethkingia anophelis	15	0.0017295
1	X1	Species	Variovorax dokdonensis	5	0.0005765
1	X1	Species	Burkholderia phenoliruptrix	6	0.0006918
1	X1	Species	Thermoanaerobacter inferii	48	0.0055344
1	X1	Species	Gallionella ferruginea	1	0.0001153
1	X1	Species	Lautropia mirabilis	10	0.001153
1	X1	Species	Corynebacterium nuruki	8	0.0009224
1	X1	Species	Propionibacterium acnes	34	0.0039202
1	X1	Species	Pseudomonas fuscovaginae	1	0.0001153
1	X1	Species	Acidovorax anthurii	14	0.0016142
1	X1	Species	Alkaliphilus crotonatoxidans	2	0.0002306
1	X1	Species	Bdellovibrio exovorus	10	0.001153
1	X1	Species	Pseudomonas lundensis	9	0.0010377
1	X1	Species	Ehrlichia ovina	6	0.0006918
1	X1	Species	Dokdonella fugitiva	2	0.0002306
1	X1	Species	Stenotrophomonas retroflexus	29	0.0033437
1	X1	Species	Desulfovibrio carbinolicus	1	0.0001153
1	X1	Species	Gemmata obscuriglobus	18	0.0020754
1	X1	Species	Candidatus Rhabdochlamydia crassificans	56	0.0064568
1	X1	Species	Vogesella perlucida	28	0.0032284
1	X1	Species	Clostridium taeniosporum	1	0.0001153
1	X1	Species	Microbacterium paludicola	6	0.0006918
1	X1	Species	Rhodobacter gluconicum	6	0.0006918
1	X1	Species	Pseudaminobacter defluvii	2	0.0002306
1	X1	Species	Propionibacterium microaerophilum	1	0.0001153
1	X1	Species	Acidovorax facilis	22	0.0025366
1	X1	Species	Niastella koreensis	17	0.0019601
1	X1	Species	Roseospira visakhapatnamensis	1	0.0001153
1	X1	Species	Xanthomonas oryzae	7	0.0008071
1	X1	Species	Agromyces terreus	1	0.0001153
1	X1	Species	Enterobacter nickellidurans	2	0.0002306
1	X1	Species	Limnobacter thiooxidans	3	0.0003459
1	X1	Species	Desulfurispora thermophila	1	0.0001153
1	X1	Species	Pseudomonas plecoglossicida	1	0.0001153
1	X1	Species	Candidatus Liberibacter solanacearum	6	0.0006918
1	X1	Species	Brevundimonas terrae	5	0.0005765
1	X1	Species	Lachnospira pectinoschiza	11	0.0012683
1	X1	Species	Propionivibrio dicarboxylicus	1	0.0001153
1	X1	Species	Agrobacterium undicola	5	0.0005765
1	X1	Species	Pelagicoccus croceus	1	0.0001153
1	X1	Species	Tepidimonas thermarum	4	0.0004612
1	X1	Species	Caulobacter tundrae	1	0.0001153
1	X1	Species	Comamonas composti	12	0.0013836
1	X1	Species	Chryseobacterium caeni	4	0.0004612
1	X1	Species	Uliginosibacterium gangwonense	1	0.0001153
1	X1	Species	Chromobacterium haemolyticum	6	0.0006918
1	X1	Species	Desulfosporosinus hippei	2	0.0002306
1	X1	Species	Thiomonas perometabolis	14	0.0016142
1	X1	Species	Sphingomonas oligophenolica	3	0.0003459
1	X1	Species	Rhodobacter ovatus	1	0.0001153
1	X1	Species	Alcanivorax indicus	1	0.0001153
1	X1	Species	Pseudomonas gessardii	2	0.0002306
1	X1	Species	Kribbella ginsengisoli	2	0.0002306
1	X1	Species	Achromobacter xylosoxidans	7	0.0008071
1	X1	Species	Achromobacter arsenitoxydans	9	0.0010377
1	X1	Species	Corynebacterium acetoacidophilum	1	0.0001153
1	X1	Species	Agrobacterium larrymoorei	3	0.0003459
1	X1	Species	Acinetobacter xiamenensis	1	0.0001153
1	X1	Species	Candidatus Blochmannia herculeanus	1	0.0001153
1	X1	Species	Burkholderia seminalis	1	0.0001153
1	X1	Species	Pseudomonas mosselii	2	0.0002306
1	X1	Species	Myroides injenensis	10	0.001153
1	X1	Species	Fervidobacterium pennivorans	1	0.0001153
1	X1	Species	Ectothiorhodospira haloalkaliphila	21	0.0024213
1	X1	Species	Marinobacter squalenivorans	3	0.0003459
1	X1	Species	Thermodesulfovibrio aggregans	4	0.0004612
1	X1	Species	Mycoplasma timone	5	0.0005765
1	X1	Species	Giesbergeria voronezhensis	1	0.0001153
1	X1	Species	Salinicoccus iranensis	13	0.0014989
1	X1	Species	Desulfurispirillum alkaliphilum	4	0.0004612
1	X1	Species	Nitrobacter hamburgensis	1	0.0001153
1	X1	Species	Leptothrix discophora	14	0.0016142
1	X1	Species	Sphingobium abikonense	3	0.0003459
1	X1	Species	Comamonas koreensis	3	0.0003459
1	X1	Species	Rickettsia monacensis	3	0.0003459
1	X1	Species	Limnohabitans parvus	1	0.0001153
1	X1	Species	Pelagicoccus mobilis	1	0.0001153
1	X1	Species	Pseudomonas proteolytica	3	0.0003459
1	X1	Species	Niabella aurantiaca	12	0.0013836
1	X1	Species	Flavobacterium glycines	2	0.0002306
1	X1	Species	Rhizobium alamii	7	0.0008071
1	X1	Species	Helicobacter suncus	2	0.0002306
1	X1	Species	Pseudomonas fluorescens	1	0.0001153
1	X1	Species	Caulobacter crescentus	4	0.0004612
1	X1	Species	Ralstonia pickettii	1	0.0001153
1	X1	Species	Trabulsiella odontotermitis	8	0.0009224
1	X1	Species	Dickeya dianthicola	1	0.0001153
1	X1	Species	Denitrobacter permanens	1	0.0001153
1	X1	Species	Methylonatrum kenyense	2	0.0002306
1	X1	Species	Halomonas neptunia	2	0.0002306
1	X1	Species	Legionella cherrii	2	0.0002306
1	X1	Species	Methylobacillus glycogenes	2	0.0002306
1	X1	Species	Pedobacter cryoconitis	1	0.0001153
1	X1	Species	Deefgea rivuli	2	0.0002306
1	X1	Species	Mesoplasma entomophilum	1	0.0001153
1	X1	Species	Lewinella lutea	4	0.0004612
1	X1	Species	Pseudomonas corrugata	3	0.0003459
1	X1	Species	Sporotomaculum syntrophicum	1	0.0001153
1	X1	Species	Erythrobacter aquimaris	1	0.0001153
1	X1	Species	Flavobacterium suncheonense	3	0.0003459
1	X1	Species	Pedobacter suwonensis	1	0.0001153
1	X1	Species	Azohydromonas australica	1	0.0001153
1	X1	Species	Gluconobacter krungthepensis	2	0.0002306
1	X1	Species	Psychrobacter pulmonis	1	0.0001153
1	X1	Species	Candidatus Phytoplasma prunorum	1	0.0001153
1	X1	Species	Alkaliphilus peptidifermentans	1	0.0001153
1	X1	Species	Rickettsia marmionii	1	0.0001153
1	X1	Species	Halomonas almeriensis	2	0.0002306
1	X1	Species	Rickettsia australis	1	0.0001153
1	X1	Species	Chroococcus minutus	2	0.0002306
1	X1	Species	Negativicoccus succinicivorans	1	0.0001153
1	X1	Species	Brevundimonas bullata	1	0.0001153
1	X1	Species	Chryseobacterium joostei	4	0.0004612
1	X1	Species	Erwinia tasmaniensis	2	0.0002306
1	X1	Species	Dechloromonas hortensis	4	0.0004612
1	X1	Species	Sporosarcina pasteurii	1	0.0001153
1	X1	Species	Clostridium thermosuccinogenes	1	0.0001153
1	X1	Species	Tepidanaerobacter syntrophicus	2	0.0002306
1	X1	Species	Pedobacter daejeonensis	3	0.0003459
1	X1	Species	Thiohalorhabdus denitrificans	3	0.0003459
1	X1	Species	Pseudomonas mendocina	1	0.0001153
1	X1	Species	Luteimonas terricola	2	0.0002306
1	X1	Species	Sphingobium faniae	1	0.0001153
1	X1	Species	Burkholderia brasilensis	1	0.0001153
1	X1	Species	Longilinea arvoryzae	1	0.0001153
1	X1	Species	Erwinia billingiae	3	0.0003459
1	X1	Species	Microcoleus antarcticus	1	0.0001153
1	X1	Species	Thermodesulfovibrio thiophilus	3	0.0003459
1	X1	Species	Hydrogenophilus denitrificans	2	0.0002306
1	X1	Species	Candidatus Endobugula glebosa	2	0.0002306
1	X1	Species	Flavobacterium terrigena	2	0.0002306
1	X1	Species	Bergeyella zoohelcum	1	0.0001153
1	X1	Species	Pseudomonas cinnamophila	1	0.0001153
1	X1	Species	Desulfovibrio psychrotolerans	1	0.0001153
1	X1	Species	Bartonella rochalimae	1	0.0001153
1	X1	Species	Pseudomonas alkylphenolia	1	0.0001153
1	X1	Species	Herbaspirillum aquaticum	1	0.0001153
1	X1	Species	Pandoraea apista	1	0.0001153
1	X1	Species	Rhodovibrio sodomensis	3	0.0003459
1	X1	Species	Stenotrophomonas koreensis	1	0.0001153
1	X1	Species	Halomonas fontilapidosi	1	0.0001153
1	X1	Species	Polaribacter butkevichii	5	0.0005765
1	X1	Species	Thauera terpenica	1	0.0001153
1	X1	Species	Chryseobacterium culicis	1	0.0001153
1	X1	Species	Paracoccus kamogawaensis	1	0.0001153
1	X1	Species	Maricaulis indicus	1	0.0001153
1	X1	Species	Tenacibaculum japonica	1	0.0001153
1	X1	Species	Methylobacterium organophilum	1	0.0001153
1	X1	Species	Zhouia amylolytica	1	0.0001153
1	X1	Species	Virgibacillus salexigens	1	0.0001153
1	X1	Species	Sutterella sanguinus	1	0.0001153
1	X1	Species	Gluconobacter morbifer	1	0.0001153
1	X1	Species	Pedobacter himalayensis	1	0.0001153
1	X1	Species	Serratia entomophila	1	0.0001153
1	X1	Species	Stenotrophomonas chelatiphaga	1	0.0001153
1	X1	Species	Agrobacterium rubi	2	0.0002306
1	X1	Species	Marinobacter szutsaonensis	1	0.0001153
1	X1	Species	Magnetospirillum bellicus	1	0.0001153
1	X1	Species	Pseudomonas benzenivorans	5	0.0005765
1	X1	Species	Edaphobacter modestus	1	0.0001153
1	X1	Species	Pseudidiomarina donghaiensis	1	0.0001153
1	X1	Species	Acidiphilium acidophilum	1	0.0001153
1	X1	Species	Clostridium thermoalcaliphilum	1	0.0001153
1	X1	Species	Pedomicrobium manganicum	1	0.0001153
1	X1	Species	Roseospira thiosulfatophila	1	0.0001153
1	X1	Species	Clostridium malenominatum	1	0.0001153
1	X1	Species	Sphingopyxis taejonensis	1	0.0001153
1	X1	Species	Klebsiella variicola	1	0.0001153
1	X1	Species	Enterobacter aceae	1	0.0001153
1	X1	Species	Propionibacterium avidum	3	0.0003459
1	X1	Species	Bacillus isabeliae	1	0.0001153
1	X1	Species	Emticicia oligotrophica	1	0.0001153
1	X1	Species	Curtobacterium pusillum	1	0.0001153
1	X1	Species	Chryseobacterium soli	1	0.0001153
1	X1	Species	Dysgonomonas wimpennyi	1	0.0001153
1	X1	Species	Herbaspirillum magnetovibrio	1	0.0001153
1	X1	Species	Flavobacterium algicola	1	0.0001153
1	X1	Species	Skermanella aerolata	1	0.0001153
1	X1	Species	Pseudomonas coronafaciens	1	0.0001153
2	X2	Kingdom	Unclassified	10457	1.57657
2	X2	Kingdom	Bacteria	652779	98.4176
2	X2	Kingdom	Viruses	39	0.00587991
2	X2	Phylum	Unclassified	11783	1.77649
2	X2	Phylum	Bacteroidetes	517002	77.9468
2	X2	Phylum	Proteobacteria	123138	18.5651
2	X2	Phylum	Planctomycetes	9785	1.47525
2	X2	Phylum	DNA	39	0.00587991
2	X2	Phylum	Chloroflexi	277	0.0417625
2	X2	Phylum	Firmicutes	730	0.11006
2	X2	Phylum	Tenericutes	56	0.00844295
2	X2	Phylum	Chlorobi	168	0.0253289
2	X2	Phylum	Chlamydiae	224	0.0337718
2	X2	Phylum	Cyanobacteria	9	0.0013569
2	X2	Phylum	Actinobacteria	50	0.00753835
2	X2	Phylum	Thermi	4	0.000603068
2	X2	Phylum	Acidobacteria	1	0.000150767
2	X2	Phylum	Chrysiogenetes	2	0.000301534
2	X2	Phylum	Spirochaetes	2	0.000301534
2	X2	Phylum	Verrucomicrobia	2	0.000301534
2	X2	Phylum	Deferribacteres	2	0.000301534
2	X2	Phylum	Nitrospirae	1	0.000150767
2	X2	Class	Unclassified	12583	1.8971
2	X2	Class	Sphingobacteriia	515445	77.7121
2	X2	Class	Betaproteobacteria	117299	17.6848
2	X2	Class	Gammaproteobacteria	3707	0.558893
2	X2	Class	Planctomycetia	9773	1.47345
2	X2	Class	Flavobacteriia	1458	0.219818
2	X2	Class	Group II	39	0.00587991
2	X2	Class	Alphaproteobacteria	1382	0.20836
2	X2	Class	Ktedonobacteria	274	0.0413102
2	X2	Class	Clostridia	579	0.0872941
2	X2	Class	Mollicutes	56	0.00844295
2	X2	Class	Chlorobia	168	0.0253289
2	X2	Class	Bacilli	148	0.0223135
2	X2	Class	Chlamydiia	224	0.0337718
2	X2	Class	Deltaproteobacteria	32	0.00482455
2	X2	Class	Nostocophycideae	3	0.000452301
2	X2	Class	Anaerolineae	2	0.000301534
2	X2	Class	Actinobacteria	50	0.00753835
2	X2	Class	Bacteroidia	4	0.000603068
2	X2	Class	Deinococci	4	0.000603068
2	X2	Class	Acidobacteria	1	0.000150767
2	X2	Class	Chrysiogenetes	2	0.000301534
2	X2	Class	Epsilonproteobacteria	22	0.00331687
2	X2	Class	Spirochaetes	2	0.000301534
2	X2	Class	Opitutae	2	0.000301534
2	X2	Class	Brocadiae	12	0.0018092
2	X2	Class	Deferribacteres	2	0.000301534
2	X2	Class	Nitrospira	1	0.000150767
2	X2	Class	Synechococcophycideae	1	0.000150767
2	X2	Order	Unclassified	13424	2.0239
2	X2	Order	Sphingobacteriales	515445	77.7121
2	X2	Order	Neisseriales	3416	0.51502
2	X2	Order	Burkholderiales	113046	17.0436
2	X2	Order	Alteromonadales	362	0.0545777
2	X2	Order	Gemmatales	7923	1.19453
2	X2	Order	Pseudomonadales	2346	0.353699
2	X2	Order	Flavobacteriales	1458	0.219818
2	X2	Order	(Microviridae)	39	0.00587991
2	X2	Order	Rickettsiales	199	0.0300026
2	X2	Order	Thermogemmatisporales	274	0.0413102
2	X2	Order	Enterobacteriales	102	0.0153782
2	X2	Order	Rhizobiales	527	0.0794542
2	X2	Order	Chromatiales	305	0.0459839
2	X2	Order	Pirellulales	1827	0.275451
2	X2	Order	Rhodobacterales	108	0.0162828
2	X2	Order	Clostridiales	571	0.086088
2	X2	Order	Oceanospirillales	141	0.0212581
2	X2	Order	Thiotrichales	74	0.0111568
2	X2	Order	Caulobacterales	443	0.0667898
2	X2	Order	Xanthomonadales	291	0.0438732
2	X2	Order	Acholeplasmatales	53	0.00799065
2	X2	Order	Chlorobiales	168	0.0253289
2	X2	Order	Bacillales	117	0.0176397
2	X2	Order	Chlamydiales	224	0.0337718
2	X2	Order	Sphingomonadales	45	0.00678452
2	X2	Order	Planctomycetales	13	0.00195997
2	X2	Order	Syntrophobacterales	18	0.00271381
2	X2	Order	Lactobacillales	31	0.00467378
2	X2	Order	Stigonematales	1	0.000150767
2	X2	Order	Anaerolineales	2	0.000301534
2	X2	Order	Rhodospirillales	44	0.00663375
2	X2	Order	Legionellales	23	0.00346764
2	X2	Order	Rhodocyclales	80	0.0120614
2	X2	Order	Actinomycetales	29	0.00437224
2	X2	Order	Bacteroidales	4	0.000603068
2	X2	Order	Thermales	1	0.000150767
2	X2	Order	Gallionellales	4	0.000603068
2	X2	Order	Acidobacteriales	1	0.000150767
2	X2	Order	Desulfovibrionales	9	0.0013569
2	X2	Order	Mycoplasmatales	3	0.000452301
2	X2	Order	Chrysiogenales	2	0.000301534
2	X2	Order	Campylobacterales	22	0.00331687
2	X2	Order	Bifidobacteriales	19	0.00286457
2	X2	Order	Borreliales	2	0.000301534
2	X2	Order	Deinococcales	3	0.000452301
2	X2	Order	Methylophilales	2	0.000301534
2	X2	Order	Nostocales	2	0.000301534
2	X2	Order	Aeromonadales	4	0.000603068
2	X2	Order	Thermoanaerobacterales	4	0.000603068
2	X2	Order	Bdellovibrionales	1	0.000150767
2	X2	Order	Pelagicoccales	1	0.000150767
2	X2	Order	Myxococcales	2	0.000301534
2	X2	Order	Hydrogenophilales	1	0.000150767
2	X2	Order	Brocadiales	12	0.0018092
2	X2	Order	Deferribacterales	2	0.000301534
2	X2	Order	Kiloniellales	1	0.000150767
2	X2	Order	Nitrospirales	1	0.000150767
2	X2	Order	Pasteurellales	1	0.000150767
2	X2	Order	Vibrionales	1	0.000150767
2	X2	Order	Pseudanabaenales	1	0.000150767
2	X2	Family	Unclassified	26052	3.92778
2	X2	Family	Amoebophilaceae	446217	67.2748
2	X2	Family	Neisseriaceae	3416	0.51502
2	X2	Family	Comamonadaceae	73032	11.0108
2	X2	Family	Chitinophagaceae	54090	8.15499
2	X2	Family	Alteromonadaceae	279	0.042064
2	X2	Family	Oxalobacteraceae	39525	5.95907
2	X2	Family	Sphingobacteriaceae	2747	0.414157
2	X2	Family	Gemmataceae	7896	1.19046
2	X2	Family	Pseudomonadaceae	2270	0.342241
2	X2	Family	Flavobacteriaceae	1458	0.219818
2	X2	Family	Microviridae	39	0.00587991
2	X2	Family	Rickettsiaceae	189	0.028495
2	X2	Family	Thermogemmatisporaceae	274	0.0413102
2	X2	Family	Enterobacteriaceae	102	0.0153782
2	X2	Family	Xanthobacteraceae	15	0.00226151
2	X2	Family	Hyphomicrobiaceae	252	0.0379933
2	X2	Family	Ectothiorhodospiraceae	283	0.0426671
2	X2	Family	Pirellulaceae	1827	0.275451
2	X2	Family	Rhodobacteraceae	106	0.0159813
2	X2	Family	Veillonellaceae	547	0.0824696
2	X2	Family	Oceanospirillaceae	119	0.0179413
2	X2	Family	Piscirickettsiaceae	71	0.0107045
2	X2	Family	Caulobacteraceae	443	0.0667898
2	X2	Family	Xanthomonadaceae	291	0.0438732
2	X2	Family	Acholeplasmataceae	53	0.00799065
2	X2	Family	Burkholderiaceae	109	0.0164336
2	X2	Family	Isosphaeraceae	23	0.00346764
2	X2	Family	Chlorobiaceae	168	0.0253289
2	X2	Family	Staphylococcaceae	112	0.0168859
2	X2	Family	Parachlamydiaceae	212	0.0319626
2	X2	Family	Shewanellaceae	77	0.0116091
2	X2	Family	Rhizobiaceae	173	0.0260827
2	X2	Family	Sphingomonadaceae	45	0.00678452
2	X2	Family	Peptococcaceae	9	0.0013569
2	X2	Family	Flexibacteraceae	93	0.0140213
2	X2	Family	Planctomycetaceae	13	0.00195997
2	X2	Family	Syntrophaceae	12	0.0018092
2	X2	Family	Rivulariaceae	1	0.000150767
2	X2	Family	Anaerolinaceae	2	0.000301534
2	X2	Family	Waddliaceae	2	0.000301534
2	X2	Family	Leuconostocaceae	14	0.00211074
2	X2	Family	Alcaligenaceae	107	0.0161321
2	X2	Family	Moraxellaceae	76	0.0114583
2	X2	Family	Acetobacteraceae	9	0.0013569
2	X2	Family	Coxiellaceae	3	0.000452301
2	X2	Family	Rhodocyclaceae	80	0.0120614
2	X2	Family	Streptomycetaceae	2	0.000301534
2	X2	Family	Phyllobacteriaceae	39	0.00587991
2	X2	Family	Saprospiraceae	10	0.00150767
2	X2	Family	Methylobacteriaceae	30	0.00452301
2	X2	Family	Thermaceae	1	0.000150767
2	X2	Family	Rhodospirillaceae	35	0.00527685
2	X2	Family	Litoricolaceae	13	0.00195997
2	X2	Family	Francisellaceae	9	0.0013569
2	X2	Family	Gallionellaceae	4	0.000603068
2	X2	Family	Acidobacteriaceae	1	0.000150767
2	X2	Family	Propionibacteriaceae	3	0.000452301
2	X2	Family	Desulfonatronumaceae	8	0.00120614
2	X2	Family	Halomonadaceae	9	0.0013569
2	X2	Family	Mycoplasmataceae	3	0.000452301
2	X2	Family	Chrysiogenaceae	2	0.000301534
2	X2	Family	Anaplasmataceae	8	0.00120614
2	X2	Family	Helicobacteraceae	14	0.00211074
2	X2	Family	Syntrophobacteraceae	3	0.000452301
2	X2	Family	Bifidobacteriaceae	19	0.00286457
2	X2	Family	Borreliaceae	2	0.000301534
2	X2	Family	Deinococcaceae	3	0.000452301
2	X2	Family	Legionellaceae	11	0.00165844
2	X2	Family	Microbacteriaceae	16	0.00241227
2	X2	Family	Methylophilaceae	2	0.000301534
2	X2	Family	Flammeovirgaceae	9	0.0013569
2	X2	Family	Nocardiaceae	1	0.000150767
2	X2	Family	Pseudonocardiaceae	1	0.000150767
2	X2	Family	Nostocaceae	2	0.000301534
2	X2	Family	Pseudoalteromonadaceae	5	0.000753835
2	X2	Family	Aeromonadaceae	4	0.000603068
2	X2	Family	Nocardioidaceae	1	0.000150767
2	X2	Family	Caldicellulosiruptoraceae	4	0.000603068
2	X2	Family	Bdellovibrionaceae	1	0.000150767
2	X2	Family	Pelagicoccaceae	1	0.000150767
2	X2	Family	Carboxydocellaceae	1	0.000150767
2	X2	Family	Haliangiaceae	1	0.000150767
2	X2	Family	Hydrogenophilaceae	1	0.000150767
2	X2	Family	Bacillaceae	5	0.000753835
2	X2	Family	Campylobacteraceae	7	0.00105537
2	X2	Family	Thiotrichaceae	2	0.000301534
2	X2	Family	Brocadiaceae	12	0.0018092
2	X2	Family	Rhodothermaceae	2	0.000301534
2	X2	Family	Rhabdochlamydiaceae	2	0.000301534
2	X2	Family	Deferribacteraceae	2	0.000301534
2	X2	Family	Bradyrhizobiaceae	2	0.000301534
2	X2	Family	Kiloniellaceae	1	0.000150767
2	X2	Family	Lachnospiraceae	5	0.000753835
2	X2	Family	Polyangiaceae	1	0.000150767
2	X2	Family	Glycomycetaceae	1	0.000150767
2	X2	Family	Clostridiaceae	3	0.000452301
2	X2	Family	Thermodesulfovibrionaceae	1	0.000150767
2	X2	Family	Pasteurellaceae	1	0.000150767
2	X2	Family	Porphyromonadaceae	3	0.000452301
2	X2	Family	Chromatiaceae	7	0.00105537
2	X2	Family	Desulfobacteraceae	3	0.000452301
2	X2	Family	Vibrionaceae	1	0.000150767
2	X2	Family	Methylocystaceae	1	0.000150767
2	X2	Family	Pseudanabaenaceae	1	0.000150767
2	X2	Genus	Unclassified	70428	10.6182
2	X2	Genus	Candidatus Amoebophilus	446217	67.2748
2	X2	Genus	Chromobacterium	2038	0.307263
2	X2	Genus	Chitinophaga	10231	1.5425
2	X2	Genus	Hydrogenophaga	709	0.106894
2	X2	Genus	Segetibacter	39599	5.97022
2	X2	Genus	Acidovorax	2675	0.403302
2	X2	Genus	Rhodoferax	18506	2.79009
2	X2	Genus	Marinobacter	276	0.0416117
2	X2	Genus	Delftia	2529	0.38129
2	X2	Genus	Oxalobacter	36549	5.51038
2	X2	Genus	Pedobacter	2387	0.359881
2	X2	Genus	Gemmata	7896	1.19046
2	X2	Genus	Paucibacter	1720	0.259319
2	X2	Genus	Pelomonas	591	0.0891033
2	X2	Genus	Pseudomonas	2269	0.34209
2	X2	Genus	Giesbergeria	3167	0.477479
2	X2	Genus	Curvibacter	218	0.0328672
2	X2	Genus	Comamonas	934	0.140816
2	X2	Genus	Sphingobacterium	331	0.0499039
2	X2	Genus	Microvirus	39	0.00587991
2	X2	Genus	Rickettsia	189	0.028495
2	X2	Genus	Thermogemmatispora	274	0.0413102
2	X2	Genus	Vogesella	948	0.142927
2	X2	Genus	Enterobacter	81	0.0122121
2	X2	Genus	Janthinobacterium	2107	0.317666
2	X2	Genus	Limnohabitans	876	0.132072
2	X2	Genus	Leptothrix	155	0.0233689
2	X2	Genus	Rubrivivax	363	0.0547284
2	X2	Genus	Ancylobacter	14	0.00211074
2	X2	Genus	Hyphomicrobium	237	0.0357318
2	X2	Genus	Ectothiorhodospira	67	0.0101014
2	X2	Genus	Elizabethkingia	817	0.123177
2	X2	Genus	Limnobacter	310	0.0467378
2	X2	Genus	Pirellula	1827	0.275451
2	X2	Genus	Thiorhodospira	185	0.0278919
2	X2	Genus	Aquitalea	372	0.0560853
2	X2	Genus	Chryseobacterium	293	0.0441747
2	X2	Genus	Paracoccus	88	0.0132675
2	X2	Genus	Pectinatus	324	0.0488485
2	X2	Genus	Flavisolibacter	792	0.119407
2	X2	Genus	Marinomonas	116	0.017489
2	X2	Genus	Methylophaga	69	0.0104029
2	X2	Genus	Methylibium	97	0.0146244
2	X2	Genus	Variovorax	81	0.0122121
2	X2	Genus	Ralstonia	284	0.0428178
2	X2	Genus	Arthrospira	333	0.0502054
2	X2	Genus	Stenotrophomonas	279	0.042064
2	X2	Genus	Myroides	58	0.00874449
2	X2	Genus	Flavobacterium	123	0.0185443
2	X2	Genus	Candidatus Phytoplasma	52	0.00783989
2	X2	Genus	Brevundimonas	23	0.00346764
2	X2	Genus	Amaricoccus	2	0.000301534
2	X2	Genus	Burkholderia	83	0.0125137
2	X2	Genus	Megasphaera	222	0.0334703
2	X2	Genus	Singulisphaera	23	0.00346764
2	X2	Genus	Chlorobaculum	168	0.0253289
2	X2	Genus	Candidatus Glomeribacter	3	0.000452301
2	X2	Genus	Macrococcus	101	0.0152275
2	X2	Genus	Candidatus Protochlamydia	212	0.0319626
2	X2	Genus	Shewanella	77	0.0116091
2	X2	Genus	Polaromonas	42	0.00633222
2	X2	Genus	Lautropia	19	0.00286457
2	X2	Genus	Agrobacterium	160	0.0241227
2	X2	Genus	Hymenobacter	18	0.00271381
2	X2	Genus	Planctomyces	13	0.00195997
2	X2	Genus	Desulfomonile	12	0.0018092
2	X2	Genus	Polynucleobacter	71	0.0107045
2	X2	Genus	Calothrix	1	0.000150767
2	X2	Genus	Longilinea	1	0.000150767
2	X2	Genus	Waddlia	2	0.000301534
2	X2	Genus	Sphingomonas	14	0.00211074
2	X2	Genus	Leuconostoc	14	0.00211074
2	X2	Genus	Achromobacter	104	0.0156798
2	X2	Genus	Acinetobacter	68	0.0102522
2	X2	Genus	Gluconobacter	8	0.00120614
2	X2	Genus	Rickettsiella	2	0.000301534
2	X2	Genus	Methyloversatilis	53	0.00799065
2	X2	Genus	Thiomonas	11	0.00165844
2	X2	Genus	Spirosoma	63	0.00949832
2	X2	Genus	Mitsuaria	9	0.0013569
2	X2	Genus	Olivibacter	15	0.00226151
2	X2	Genus	Niastella	16	0.00241227
2	X2	Genus	Streptomyces	2	0.000301534
2	X2	Genus	Mesorhizobium	9	0.0013569
2	X2	Genus	Lewinella	10	0.00150767
2	X2	Genus	Stenoxybacter	2	0.000301534
2	X2	Genus	Pelotomaculum	8	0.00120614
2	X2	Genus	Methylobacterium	30	0.00452301
2	X2	Genus	Luteimonas	3	0.000452301
2	X2	Genus	Thermus	1	0.000150767
2	X2	Genus	Tepidimonas	6	0.000904602
2	X2	Genus	Litoricola	13	0.00195997
2	X2	Genus	Herbaspirillum	11	0.00165844
2	X2	Genus	Francisella	9	0.0013569
2	X2	Genus	Gallionella	4	0.000603068
2	X2	Genus	Edaphobacter	1	0.000150767
2	X2	Genus	Propionibacterium	3	0.000452301
2	X2	Genus	Gillisia	4	0.000603068
2	X2	Genus	Desulfonatronum	8	0.00120614
2	X2	Genus	Xanthobacter	1	0.000150767
2	X2	Genus	Rhodospirillum	19	0.00286457
2	X2	Genus	Halomonas	7	0.00105537
2	X2	Genus	Mycoplasma	3	0.000452301
2	X2	Genus	Niabella	16	0.00241227
2	X2	Genus	Denitratisoma	12	0.0018092
2	X2	Genus	Desulfurispirillum	2	0.000301534
2	X2	Genus	Chelativorans	28	0.00422148
2	X2	Genus	Ehrlichia	3	0.000452301
2	X2	Genus	Phenylobacterium	3	0.000452301
2	X2	Genus	Azohydromonas	12	0.0018092
2	X2	Genus	Helicobacter	14	0.00211074
2	X2	Genus	Psychrobacter	8	0.00120614
2	X2	Genus	Bifidobacterium	19	0.00286457
2	X2	Genus	Halorhodospira	8	0.00120614
2	X2	Genus	Salinicoccus	5	0.000753835
2	X2	Genus	Borrelia	2	0.000301534
2	X2	Genus	Runella	7	0.00105537
2	X2	Genus	Deinococcus	3	0.000452301
2	X2	Genus	Legionella	11	0.00165844
2	X2	Genus	Thermomonas	2	0.000301534
2	X2	Genus	Acholeplasma	1	0.000150767
2	X2	Genus	Candidatus Liberibacter	7	0.00105537
2	X2	Genus	Microbacterium	15	0.00226151
2	X2	Genus	Polaribacter	1	0.000150767
2	X2	Genus	Methylobacillus	2	0.000301534
2	X2	Genus	Roseospira	2	0.000301534
2	X2	Genus	Rhodobacter	6	0.000904602
2	X2	Genus	Flammeovirga	9	0.0013569
2	X2	Genus	Candidatus Blochmannia	8	0.00120614
2	X2	Genus	Rhodococcus	1	0.000150767
2	X2	Genus	Sphingobium	12	0.0018092
2	X2	Genus	Saccharopolyspora	1	0.000150767
2	X2	Genus	Pseudoalteromonas	5	0.000753835
2	X2	Genus	Bellilinea	1	0.000150767
2	X2	Genus	Tolumonas	4	0.000603068
2	X2	Genus	Kribbella	1	0.000150767
2	X2	Genus	Microbulbifer	2	0.000301534
2	X2	Genus	Caldicellulosiruptor	4	0.000603068
2	X2	Genus	Bdellovibrio	1	0.000150767
2	X2	Genus	Thioalkalimicrobium	1	0.000150767
2	X2	Genus	Pelagicoccus	1	0.000150767
2	X2	Genus	Thermonema	2	0.000301534
2	X2	Genus	Carboxydocella	1	0.000150767
2	X2	Genus	Rhodoplanes	8	0.00120614
2	X2	Genus	Tenacibaculum	3	0.000452301
2	X2	Genus	Hydrogenophilus	4	0.000603068
2	X2	Genus	Haliangium	1	0.000150767
2	X2	Genus	Dechloromonas	5	0.000753835
2	X2	Genus	Thiobacillus	1	0.000150767
2	X2	Genus	Serratia	2	0.000301534
2	X2	Genus	Bacillus	4	0.000603068
2	X2	Genus	Neorickettsia	5	0.000753835
2	X2	Genus	Thauera	2	0.000301534
2	X2	Genus	Campylobacter	7	0.00105537
2	X2	Genus	Leucothrix	1	0.000150767
2	X2	Genus	Candidatus Scalindua	12	0.0018092
2	X2	Genus	Rhodothermus	2	0.000301534
2	X2	Genus	Candidatus Endobugula	1	0.000150767
2	X2	Genus	Candidatus Rhabdochlamydia	2	0.000301534
2	X2	Genus	Shinella	1	0.000150767
2	X2	Genus	Deferribacter	2	0.000301534
2	X2	Genus	Sphingopyxis	2	0.000301534
2	X2	Genus	Bradyrhizobium	2	0.000301534
2	X2	Genus	Thalassospira	1	0.000150767
2	X2	Genus	Agromyces	1	0.000150767
2	X2	Genus	Blautia	3	0.000452301
2	X2	Genus	Propionivibrio	3	0.000452301
2	X2	Genus	Coxiella	1	0.000150767
2	X2	Genus	Chondromyces	1	0.000150767
2	X2	Genus	Brenneria	3	0.000452301
2	X2	Genus	Glycomyces	1	0.000150767
2	X2	Genus	Clostridium	2	0.000301534
2	X2	Genus	Alkaliphilus	1	0.000150767
2	X2	Genus	Johnsonella	1	0.000150767
2	X2	Genus	Lachnospira	1	0.000150767
2	X2	Genus	Thermodesulfovibrio	1	0.000150767
2	X2	Genus	Pontibacter	1	0.000150767
2	X2	Genus	Pasteurella	1	0.000150767
2	X2	Genus	Azospirillum	1	0.000150767
2	X2	Genus	Aminobacter	1	0.000150767
2	X2	Genus	Bergeyella	1	0.000150767
2	X2	Genus	Novosphingobium	1	0.000150767
2	X2	Genus	Azoarcus	1	0.000150767
2	X2	Genus	Porphyromonas	3	0.000452301
2	X2	Genus	Thiocystis	2	0.000301534
2	X2	Genus	Dyadobacter	1	0.000150767
2	X2	Genus	Marinospirillum	2	0.000301534
2	X2	Genus	Phaeobacter	2	0.000301534
2	X2	Genus	Collimonas	1	0.000150767
2	X2	Genus	Desulfosarcina	2	0.000301534
2	X2	Genus	Devosia	4	0.000603068
2	X2	Genus	Dokdonella	2	0.000301534
2	X2	Genus	Cycloclasticus	1	0.000150767
2	X2	Genus	Luteibacter	1	0.000150767
2	X2	Genus	Vibrio	1	0.000150767
2	X2	Genus	Methylosinus	1	0.000150767
2	X2	Genus	Leptolyngbya	1	0.000150767
2	X2	Genus	Alishewanella	1	0.000150767
2	X2	Genus	Neisseria	1	0.000150767
2	X2	Genus	Sutterella	1	0.000150767
2	X2	Genus	Klebsiella	1	0.000150767
2	X2	Genus	Thiothrix	1	0.000150767
2	X2	Genus	Geobacillus	1	0.000150767
2	X2	Genus	Roseateles	3	0.000452301
2	X2	Genus	Asticcacaulis	1	0.000150767
2	X2	Species	Unclassified	104997	15.8301
2	X2	Species	Candidatus Amoebophilus asiaticus	446217	67.2748
2	X2	Species	Chitinophaga soli	10229	1.5422
2	X2	Species	Hydrogenophaga defluvii	709	0.106894
2	X2	Species	Segetibacter aerophilus	39599	5.97022
2	X2	Species	Acidovorax delafieldii	796	0.120011
2	X2	Species	Rhodoferax ferrireducens	1271	0.191625
2	X2	Species	Marinobacter arcticus	273	0.0411594
2	X2	Species	Delftia lacustris	2156	0.325054
2	X2	Species	Oxalobacter vibrioformis	36549	5.51038
2	X2	Species	Rhodoferax antarcticus	5393	0.813087
2	X2	Species	Pelomonas saccharophila	591	0.0891033
2	X2	Species	Pseudomonas collierea	86	0.012966
2	X2	Species	Curvibacter gracilis	173	0.0260827
2	X2	Species	Acidovorax wohlfahrtii	1422	0.214391
2	X2	Species	Comamonas kerstersii	291	0.0438732
2	X2	Species	Acidovorax facilis	82	0.0123629
2	X2	Species	Sphingobacterium shayense	330	0.0497531
2	X2	Species	Microvirus Enterobacteria phage PhiX174	39	0.00587991
2	X2	Species	Rickettsia limoniae	29	0.00437224
2	X2	Species	Enterobacter hormaechei	40	0.00603068
2	X2	Species	Vogesella perlucida	231	0.0348272
2	X2	Species	Janthinobacterium agaricidamnosum	2107	0.317666
2	X2	Species	Delftia tsuruhatensis	328	0.0494516
2	X2	Species	Pseudomonas brenneri	1371	0.206702
2	X2	Species	Ectothiorhodospira haloalkaliphila	67	0.0101014
2	X2	Species	Acidovorax temperans	164	0.0247258
2	X2	Species	Elizabethkingia meningoseptica	803	0.121066
2	X2	Species	Leptothrix discophora	69	0.0104029
2	X2	Species	Pirellula staleyi	1798	0.271079
2	X2	Species	Pseudomonas plecoglossicida	33	0.00497531
2	X2	Species	Thiorhodospira sibirica	168	0.0253289
2	X2	Species	Aquitalea denitrificans	372	0.0560853
2	X2	Species	Chryseobacterium indologenes	215	0.0324149
2	X2	Species	Pectinatus cerevisiiphilus	324	0.0488485
2	X2	Species	Flavisolibacter ginsengisoli	792	0.119407
2	X2	Species	Paracoccus sulfuroxidans	9	0.0013569
2	X2	Species	Variovorax boronicumulans	71	0.0107045
2	X2	Species	Ralstonia insidiosa	234	0.0352795
2	X2	Species	Arthrospira fusiformis	261	0.0393502
2	X2	Species	Stenotrophomonas geniculata	186	0.0280427
2	X2	Species	Stenotrophomonas pavanii	48	0.00723682
2	X2	Species	Myroides odoratus	58	0.00874449
2	X2	Species	Flavobacterium swingsii	96	0.0144736
2	X2	Species	Brevundimonas staleyi	17	0.00256304
2	X2	Species	Pseudomonas panipatensis	81	0.0122121
2	X2	Species	Amaricoccus kaplicensis	1	0.000150767
2	X2	Species	Pseudomonas pseudoalcaligenes	287	0.0432701
2	X2	Species	Megasphaera hominis	222	0.0334703
2	X2	Species	Pseudomonas mucidolens	2	0.000301534
2	X2	Species	Limnobacter thiooxidans	75	0.0113075
2	X2	Species	Marinomonas basaltis	2	0.000301534
2	X2	Species	Candidatus Protochlamydia amoebophila	207	0.0312088
2	X2	Species	Pseudomonas teessidea	12	0.0018092
2	X2	Species	Lautropia mirabilis	19	0.00286457
2	X2	Species	Comamonas nitrativorans	75	0.0113075
2	X2	Species	Comamonas composti	34	0.00512608
2	X2	Species	Pseudomonas marginalis	37	0.00557838
2	X2	Species	Pseudomonas lini	1	0.000150767
2	X2	Species	Planctomyces limnophilus	13	0.00195997
2	X2	Species	Pseudomonas moraviensis	89	0.0134183
2	X2	Species	Desulfomonile tiedjei	12	0.0018092
2	X2	Species	Stenotrophomonas maltophilia	2	0.000301534
2	X2	Species	Rubrivivax gelatinosus	18	0.00271381
2	X2	Species	Chryseobacterium isbiliense	3	0.000452301
2	X2	Species	Pseudomonas tremae	16	0.00241227
2	X2	Species	Calothrix parietina	1	0.000150767
2	X2	Species	Longilinea arvoryzae	1	0.000150767
2	X2	Species	Acidovorax valerianellae	2	0.000301534
2	X2	Species	Elizabethkingia anophelis	13	0.00195997
2	X2	Species	Acinetobacter schindleri	51	0.00768912
2	X2	Species	Agrobacterium viscosum	20	0.00301534
2	X2	Species	Spirosoma linguale	63	0.00949832
2	X2	Species	Mitsuaria chitosanitabida	9	0.0013569
2	X2	Species	Achromobacter piechaudii	10	0.00150767
2	X2	Species	Acidovorax anthurii	24	0.00361841
2	X2	Species	Niastella koreensis	16	0.00241227
2	X2	Species	Agrobacterium tumefaciens	79	0.0119106
2	X2	Species	Polaromonas vacuolata	3	0.000452301
2	X2	Species	Streptomyces lazureus	2	0.000301534
2	X2	Species	Burkholderia ubonensis	20	0.00301534
2	X2	Species	Pseudomonas jinjuensis	10	0.00150767
2	X2	Species	Lewinella marina	7	0.00105537
2	X2	Species	Pelotomaculum isophthalicicum	8	0.00120614
2	X2	Species	Methylobacterium marchantiae	5	0.000753835
2	X2	Species	Stenotrophomonas retroflexus	6	0.000904602
2	X2	Species	Luteimonas terricola	2	0.000301534
2	X2	Species	Pseudomonas veronii	17	0.00256304
2	X2	Species	Chromobacterium haemolyticum	6	0.000904602
2	X2	Species	Paracoccus aestuarii	1	0.000150767
2	X2	Species	Tepidimonas thermarum	3	0.000452301
2	X2	Species	Herbaspirillum magnetovibrio	2	0.000301534
2	X2	Species	Limnohabitans parvus	4	0.000603068
2	X2	Species	Francisella hispaniensis	9	0.0013569
2	X2	Species	Hyphomicrobium aestuarii	12	0.0018092
2	X2	Species	Gallionella ferruginea	4	0.000603068
2	X2	Species	Achromobacter xylosoxidans	10	0.00150767
2	X2	Species	Ralstonia pickettii	34	0.00512608
2	X2	Species	Edaphobacter modestus	1	0.000150767
2	X2	Species	Propionibacterium acnes	2	0.000301534
2	X2	Species	Acinetobacter haemolyticus	3	0.000452301
2	X2	Species	Chlorobaculum limnaeum	10	0.00150767
2	X2	Species	Pseudomonas proteolytica	1	0.000150767
2	X2	Species	Agrobacterium undicola	3	0.000452301
2	X2	Species	Curvibacter lanceolatus	29	0.00437224
2	X2	Species	Desulfonatronum thiosulfatophilum	8	0.00120614
2	X2	Species	Rickettsia aeschlimannii	4	0.000603068
2	X2	Species	Xanthobacter polyaromaticivorans	1	0.000150767
2	X2	Species	Pedobacter africanus	18	0.00271381
2	X2	Species	Enterobacter amnigenus	35	0.00527685
2	X2	Species	Halomonas almeriensis	5	0.000753835
2	X2	Species	Pseudomonas umsongensis	1	0.000150767
2	X2	Species	Mycoplasma timone	3	0.000452301
2	X2	Species	Niabella soli	12	0.0018092
2	X2	Species	Denitratisoma oestradiolicum	12	0.0018092
2	X2	Species	Agrobacterium larrymoorei	3	0.000452301
2	X2	Species	Desulfurispirillum alkaliphilum	2	0.000301534
2	X2	Species	Ehrlichia ovina	3	0.000452301
2	X2	Species	Achromobacter arsenitoxydans	7	0.00105537
2	X2	Species	Azohydromonas australica	3	0.000452301
2	X2	Species	Psychrobacter urativorans	1	0.000150767
2	X2	Species	Achromobacter insolitus	5	0.000753835
2	X2	Species	Halorhodospira halochloris	8	0.00120614
2	X2	Species	Salinicoccus iranensis	5	0.000753835
2	X2	Species	Comamonas odontotermitis	3	0.000452301
2	X2	Species	Runella limosa	7	0.00105537
2	X2	Species	Rickettsia marmionii	1	0.000150767
2	X2	Species	Thermomonas dokdonensis	2	0.000301534
2	X2	Species	Methylobacterium organophilum	18	0.00271381
2	X2	Species	Paracoccus marinus	11	0.00165844
2	X2	Species	Acholeplasma cavigenitalium	1	0.000150767
2	X2	Species	Flavobacterium suncheonense	1	0.000150767
2	X2	Species	Pedobacter daejeonensis	1	0.000150767
2	X2	Species	Rubrivivax benzoatilyticus	2	0.000301534
2	X2	Species	Microbacterium hominis	1	0.000150767
2	X2	Species	Limnobacter litoralis	7	0.00105537
2	X2	Species	Polaribacter butkevichii	1	0.000150767
2	X2	Species	Delftia acidovorans	4	0.000603068
2	X2	Species	Methylobacillus glycogenes	2	0.000301534
2	X2	Species	Chryseobacterium soli	1	0.000150767
2	X2	Species	Rhodobacter gluconicum	3	0.000452301
2	X2	Species	Flammeovirga pacifica	9	0.0013569
2	X2	Species	Candidatus Blochmannia castaneus	8	0.00120614
2	X2	Species	Rhodococcus imtechensis	1	0.000150767
2	X2	Species	Flavobacterium succinicans	6	0.000904602
2	X2	Species	Bifidobacterium bombi	14	0.00211074
2	X2	Species	Sphingobium abikonense	6	0.000904602
2	X2	Species	Saccharopolyspora shandongensis	1	0.000150767
2	X2	Species	Comamonas koreensis	2	0.000301534
2	X2	Species	Pseudomonas mendocina	1	0.000150767
2	X2	Species	Bellilinea caldifistulae	1	0.000150767
2	X2	Species	Tolumonas auensis	4	0.000603068
2	X2	Species	Kribbella ginsengisoli	1	0.000150767
2	X2	Species	Halomonas neptunia	2	0.000301534
2	X2	Species	Enterobacter soli	2	0.000301534
2	X2	Species	Microbacterium chocolatum	7	0.00105537
2	X2	Species	Bdellovibrio exovorus	1	0.000150767
2	X2	Species	Variovorax dokdonensis	8	0.00120614
2	X2	Species	Thioalkalimicrobium sibiricum	1	0.000150767
2	X2	Species	Burkholderia sediminicola	1	0.000150767
2	X2	Species	Thermonema rossianum	1	0.000150767
2	X2	Species	Carboxydocella ferrireducens	1	0.000150767
2	X2	Species	Niabella aurantiaca	4	0.000603068
2	X2	Species	Flavobacterium chungangense	1	0.000150767
2	X2	Species	Chromobacterium piscinae	1	0.000150767
2	X2	Species	Acinetobacter gerneri	1	0.000150767
2	X2	Species	Acinetobacter tjernbergiae	11	0.00165844
2	X2	Species	Hyphomicrobium sulfonivorans	6	0.000904602
2	X2	Species	Dechloromonas hortensis	5	0.000753835
2	X2	Species	Thiobacillus thiophilus	1	0.000150767
2	X2	Species	Burkholderia phenoliruptrix	8	0.00120614
2	X2	Species	Bacillus mucilaginosus	2	0.000301534
2	X2	Species	Neorickettsia helminthoeca	5	0.000753835
2	X2	Species	Thauera terpenica	1	0.000150767
2	X2	Species	Methyloversatilis universalis	4	0.000603068
2	X2	Species	Campylobacter faecalis	6	0.000904602
2	X2	Species	Leucothrix mucor	1	0.000150767
2	X2	Species	Candidatus Scalindua brodae	12	0.0018092
2	X2	Species	Polaromonas naphthalenivorans	5	0.000753835
2	X2	Species	Rhodothermus clarus	2	0.000301534
2	X2	Species	Candidatus Endobugula glebosa	1	0.000150767
2	X2	Species	Hydrogenophilus denitrificans	2	0.000301534
2	X2	Species	Candidatus Rhabdochlamydia crassificans	2	0.000301534
2	X2	Species	Shinella fusca	1	0.000150767
2	X2	Species	Deferribacter autotrophicus	2	0.000301534
2	X2	Species	Pedobacter himalayensis	1	0.000150767
2	X2	Species	Sphingopyxis taejonensis	2	0.000301534
2	X2	Species	Legionella cherrii	1	0.000150767
2	X2	Species	Stenotrophomonas koreensis	1	0.000150767
2	X2	Species	Methylophaga lonarensis	1	0.000150767
2	X2	Species	Pedobacter suwonensis	2	0.000301534
2	X2	Species	Herbaspirillum chlorophenolicum	3	0.000452301
2	X2	Species	Lewinella lutea	1	0.000150767
2	X2	Species	Propionivibrio dicarboxylicus	2	0.000301534
2	X2	Species	Chondromyces pediculatus	1	0.000150767
2	X2	Species	Thiomonas thermosulfata	3	0.000452301
2	X2	Species	Clostridium thermosuccinogenes	2	0.000301534
2	X2	Species	Alkaliphilus crotonatoxidans	1	0.000150767
2	X2	Species	Johnsonella ignava	1	0.000150767
2	X2	Species	Herbaspirillum frisingense	2	0.000301534
2	X2	Species	Herbaspirillum rubrisubalbicans	1	0.000150767
2	X2	Species	Pedobacter cryoconitis	1	0.000150767
2	X2	Species	Lachnospira pectinoschiza	1	0.000150767
2	X2	Species	Pontibacter niistensis	1	0.000150767
2	X2	Species	Pseudomonas cinnamophila	2	0.000301534
2	X2	Species	Ralstonia detusculanense	5	0.000753835
2	X2	Species	Azospirillum rugosum	1	0.000150767
2	X2	Species	Pseudomonas corrugata	1	0.000150767
2	X2	Species	Pseudomonas migulae	1	0.000150767
2	X2	Species	Aminobacter aganoensis	1	0.000150767
2	X2	Species	Herbaspirillum aquaticum	1	0.000150767
2	X2	Species	Variovorax soli	1	0.000150767
2	X2	Species	Pseudomonas borealis	2	0.000301534
2	X2	Species	Pseudomonas thermotolerans	1	0.000150767
2	X2	Species	Bergeyella zoohelcum	1	0.000150767
2	X2	Species	Pseudomonas lundensis	1	0.000150767
2	X2	Species	Candidatus Liberibacter solanacearum	2	0.000301534
2	X2	Species	Burkholderia seminalis	1	0.000150767
2	X2	Species	Helicobacter suncus	2	0.000301534
2	X2	Species	Porphyromonas canis	3	0.000452301
2	X2	Species	Giesbergeria voronezhensis	1	0.000150767
2	X2	Species	Thiomonas perometabolis	7	0.00105537
2	X2	Species	Phenylobacterium lituiforme	1	0.000150767
2	X2	Species	Legionella shakespearei	3	0.000452301
2	X2	Species	Microbacterium paludicola	1	0.000150767
2	X2	Species	Bacillus isabeliae	1	0.000150767
2	X2	Species	Thermonema lapsum	1	0.000150767
2	X2	Species	Propionivibrio pelophilus	1	0.000150767
2	X2	Species	Devosia limi	1	0.000150767
2	X2	Species	Dokdonella fugitiva	2	0.000301534
2	X2	Species	Microbacterium hydrocarbonoxydans	1	0.000150767
2	X2	Species	Rhodobacter apigmentum	1	0.000150767
2	X2	Species	Brevundimonas olei	2	0.000301534
2	X2	Species	Cycloclasticus oligotrophus	1	0.000150767
2	X2	Species	Rickettsia hulinii	1	0.000150767
2	X2	Species	Propionibacterium avidum	1	0.000150767
2	X2	Species	Luteibacter anthropi	1	0.000150767
2	X2	Species	Pseudomonas syncyanea	1	0.000150767
2	X2	Species	Gemmata obscuriglobus	1	0.000150767
2	X2	Species	Vibrio litoralis	1	0.000150767
2	X2	Species	Polynucleobacter rarus	1	0.000150767
2	X2	Species	Marinomonas foliarum	1	0.000150767
2	X2	Species	Chromobacterium subtsugae	1	0.000150767
2	X2	Species	Flavobacterium terrigena	1	0.000150767
2	X2	Species	Gluconobacter krungthepensis	2	0.000301534
2	X2	Species	Sphingomonas leidyia	1	0.000150767
2	X2	Species	Leptolyngbya laminosa	1	0.000150767
2	X2	Species	Pseudomonas fluorescens	1	0.000150767
2	X2	Species	Chromobacterium violaceum	1	0.000150767
2	X2	Species	Neisseria mucosa	1	0.000150767
2	X2	Species	Pseudomonas coronafaciens	1	0.000150767
2	X2	Species	Pseudomonas alkylphenolia	2	0.000301534
2	X2	Species	Sutterella stercoricanis	1	0.000150767
2	X2	Species	Klebsiella granulomatis	1	0.000150767
2	X2	Species	Geobacillus anatolicus	1	0.000150767
2	X2	Species	Candidatus Phytoplasma prunorum	1	0.000150767
2	X2	Species	Roseateles depolymerans	3	0.000452301
2	X2	Species	Mesorhizobium camelthorni	1	0.000150767
3	X3	Kingdom	Unclassified	22570	2.61323
3	X3	Kingdom	Bacteria	841049	97.3795
3	X3	Kingdom	Viruses	63	0.00729435
3	X3	Phylum	Unclassified	24261	2.80902
3	X3	Phylum	Bacteroidetes	724851	83.9257
3	X3	Phylum	Proteobacteria	70337	8.14385
3	X3	Phylum	Planctomycetes	39759	4.60343
3	X3	Phylum	Firmicutes	2209	0.255765
3	X3	Phylum	Chloroflexi	310	0.0358928
3	X3	Phylum	Chlamydiae	1337	0.154802
3	X3	Phylum	Actinobacteria	422	0.0488606
3	X3	Phylum	DNA	63	0.00729435
3	X3	Phylum	Spirochaetes	2	0.000231567
3	X3	Phylum	Tenericutes	88	0.0101889
3	X3	Phylum	Cyanobacteria	20	0.00231567
3	X3	Phylum	Thermi	5	0.000578917
3	X3	Phylum	Chrysiogenetes	5	0.000578917
3	X3	Phylum	Nitrospirae	6	0.0006947
3	X3	Phylum	Acidobacteria	4	0.000463133
3	X3	Phylum	Chlorobi	1	0.000115783
3	X3	Phylum	Deferribacteres	1	0.000115783
3	X3	Phylum	Verrucomicrobia	1	0.000115783
3	X3	Class	Unclassified	25997	3.01002
3	X3	Class	Sphingobacteriia	718954	83.2429
3	X3	Class	Gammaproteobacteria	18388	2.12902
3	X3	Class	Planctomycetia	39743	4.60158
3	X3	Class	Flavobacteriia	5716	0.661818
3	X3	Class	Betaproteobacteria	41973	4.85977
3	X3	Class	Alphaproteobacteria	8326	0.964012
3	X3	Class	Clostridia	1488	0.172286
3	X3	Class	Ktedonobacteria	305	0.0353139
3	X3	Class	Chlamydiia	1337	0.154802
3	X3	Class	Actinobacteria	422	0.0488606
3	X3	Class	Group II	63	0.00729435
3	X3	Class	Epsilonproteobacteria	27	0.00312615
3	X3	Class	Bacilli	717	0.0830167
3	X3	Class	Spirochaetes	2	0.000231567
3	X3	Class	Deltaproteobacteria	70	0.00810483
3	X3	Class	Mollicutes	88	0.0101889
3	X3	Class	Brocadiae	13	0.00150518
3	X3	Class	Nostocophycideae	10	0.00115783
3	X3	Class	Deinococci	5	0.000578917
3	X3	Class	Bacteroidia	13	0.00150518
3	X3	Class	Synechococcophycideae	2	0.000231567
3	X3	Class	Chrysiogenetes	5	0.000578917
3	X3	Class	Nitrospira	6	0.0006947
3	X3	Class	Anaerolineae	5	0.000578917
3	X3	Class	Acidobacteria	4	0.000463133
3	X3	Class	Chlorobia	1	0.000115783
3	X3	Class	Deferribacteres	1	0.000115783
3	X3	Class	Opitutae	1	0.000115783
3	X3	Order	Unclassified	27082	3.13564
3	X3	Order	Sphingobacteriales	718954	83.2429
3	X3	Order	Pseudomonadales	14206	1.64482
3	X3	Order	Gemmatales	32760	3.79306
3	X3	Order	Flavobacteriales	5716	0.661818
3	X3	Order	Burkholderiales	40167	4.65067
3	X3	Order	Xanthomonadales	2131	0.246734
3	X3	Order	Caulobacterales	2573	0.297911
3	X3	Order	Rhodobacterales	1367	0.158276
3	X3	Order	Rhizobiales	3913	0.45306
3	X3	Order	Clostridiales	1463	0.169391
3	X3	Order	Alteromonadales	523	0.0605547
3	X3	Order	Pirellulales	6321	0.731867
3	X3	Order	Thermogemmatisporales	305	0.0353139
3	X3	Order	Chlamydiales	1337	0.154802
3	X3	Order	Planctomycetales	267	0.0309142
3	X3	Order	Neisseriales	1220	0.141256
3	X3	Order	Actinomycetales	362	0.0419136
3	X3	Order	(Microviridae)	63	0.00729435
3	X3	Order	Campylobacterales	27	0.00312615
3	X3	Order	Bacillales	698	0.0808168
3	X3	Order	Enterobacteriales	1308	0.151445
3	X3	Order	Rickettsiales	188	0.0217673
3	X3	Order	Borreliales	1	0.000115783
3	X3	Order	Sphingomonadales	58	0.00671543
3	X3	Order	Oceanospirillales	61	0.00706279
3	X3	Order	Rhodospirillales	148	0.0171359
3	X3	Order	Syntrophobacterales	26	0.00301037
3	X3	Order	Rhodocyclales	107	0.0123888
3	X3	Order	Acholeplasmatales	77	0.00891532
3	X3	Order	Bifidobacteriales	60	0.006947
3	X3	Order	Brocadiales	13	0.00150518
3	X3	Order	Nostocales	7	0.000810484
3	X3	Order	Deinococcales	2	0.000231567
3	X3	Order	Lactobacillales	18	0.0020841
3	X3	Order	Entomoplasmatales	1	0.000115783
3	X3	Order	Thermoanaerobacterales	4	0.000463133
3	X3	Order	Stigonematales	3	0.00034735
3	X3	Order	Bdellovibrionales	18	0.0020841
3	X3	Order	Kiloniellales	3	0.00034735
3	X3	Order	Chromatiales	8	0.000926267
3	X3	Order	Vibrionales	2	0.000231567
3	X3	Order	Mycoplasmatales	10	0.00115783
3	X3	Order	Hydrogenophilales	6	0.0006947
3	X3	Order	Desulfovibrionales	12	0.0013894
3	X3	Order	Aeromonadales	16	0.00185253
3	X3	Order	Bacteroidales	13	0.00150518
3	X3	Order	Thiotrichales	7	0.000810484
3	X3	Order	Spirochaetales	1	0.000115783
3	X3	Order	Legionellales	13	0.00150518
3	X3	Order	Gallionellales	2	0.000231567
3	X3	Order	Thermales	3	0.00034735
3	X3	Order	Pseudanabaenales	2	0.000231567
3	X3	Order	Thiohalorhabdales	4	0.000463133
3	X3	Order	Chrysiogenales	5	0.000578917
3	X3	Order	Nitrospirales	6	0.0006947
3	X3	Order	Anaerolineales	3	0.00034735
3	X3	Order	Caldilineales	2	0.000231567
3	X3	Order	Acidobacteriales	4	0.000463133
3	X3	Order	Myxococcales	1	0.000115783
3	X3	Order	Chlorobiales	1	0.000115783
3	X3	Order	Thermicanales	1	0.000115783
3	X3	Order	Deferribacterales	1	0.000115783
3	X3	Order	Methylophilales	1	0.000115783
3	X3	Family	Unclassified	45191	5.23237
3	X3	Family	Amoebophilaceae	622224	72.0432
3	X3	Family	Pseudomonadaceae	14199	1.64401
3	X3	Family	Gemmataceae	32600	3.77454
3	X3	Family	Chitinophagaceae	75112	8.69672
3	X3	Family	Flavobacteriaceae	5716	0.661818
3	X3	Family	Comamonadaceae	37696	4.36457
3	X3	Family	Xanthomonadaceae	1970	0.228093
3	X3	Family	Caulobacteraceae	2573	0.297911
3	X3	Family	Hyphomonadaceae	1114	0.128983
3	X3	Family	Rhizobiaceae	276	0.0319562
3	X3	Family	Veillonellaceae	1402	0.162328
3	X3	Family	Sphingobacteriaceae	4077	0.472049
3	X3	Family	Hyphomicrobiaceae	2522	0.292006
3	X3	Family	Alteromonadaceae	426	0.0493237
3	X3	Family	Pirellulaceae	6321	0.731867
3	X3	Family	Oxalobacteraceae	2309	0.267344
3	X3	Family	Xanthobacteraceae	360	0.041682
3	X3	Family	Thermogemmatisporaceae	305	0.0353139
3	X3	Family	Parachlamydiaceae	1291	0.149476
3	X3	Family	Waddliaceae	10	0.00115783
3	X3	Family	Planctomycetaceae	267	0.0309142
3	X3	Family	Neisseriaceae	1220	0.141256
3	X3	Family	Microbacteriaceae	301	0.0348508
3	X3	Family	Bradyrhizobiaceae	357	0.0413347
3	X3	Family	Microviridae	63	0.00729435
3	X3	Family	Lachnospiraceae	5	0.000578917
3	X3	Family	Helicobacteraceae	18	0.0020841
3	X3	Family	Staphylococcaceae	694	0.0803536
3	X3	Family	Enterobacteriaceae	1308	0.151445
3	X3	Family	Rhodobacteraceae	148	0.0171359
3	X3	Family	Flexibacteraceae	62	0.00717857
3	X3	Family	Isosphaeraceae	138	0.0159781
3	X3	Family	Shewanellaceae	79	0.00914689
3	X3	Family	Anaplasmataceae	21	0.00243145
3	X3	Family	Borreliaceae	1	0.000115783
3	X3	Family	Sphingomonadaceae	58	0.00671543
3	X3	Family	Oceanospirillaceae	31	0.00358928
3	X3	Family	Alcaligenaceae	24	0.0027788
3	X3	Family	Methylobacteriaceae	53	0.00613652
3	X3	Family	Rickettsiaceae	165	0.0191042
3	X3	Family	Syntrophaceae	19	0.00219988
3	X3	Family	Rhodocyclaceae	107	0.0123888
3	X3	Family	Acholeplasmataceae	77	0.00891532
3	X3	Family	Bifidobacteriaceae	60	0.006947
3	X3	Family	Halomonadaceae	6	0.0006947
3	X3	Family	Rhodospirillaceae	133	0.0153992
3	X3	Family	Sinobacteraceae	160	0.0185253
3	X3	Family	Brocadiaceae	13	0.00150518
3	X3	Family	Nostocaceae	7	0.000810484
3	X3	Family	Moraxellaceae	6	0.0006947
3	X3	Family	Deinococcaceae	2	0.000231567
3	X3	Family	Enterococcaceae	9	0.00104205
3	X3	Family	Saprospiraceae	15	0.00173675
3	X3	Family	Entomoplasmataceae	1	0.000115783
3	X3	Family	Brucellaceae	1	0.000115783
3	X3	Family	Litoricolaceae	24	0.0027788
3	X3	Family	Propionibacteriaceae	35	0.00405242
3	X3	Family	Nocardioidaceae	1	0.000115783
3	X3	Family	Caldicellulosiruptoraceae	4	0.000463133
3	X3	Family	Desulfobacteraceae	2	0.000231567
3	X3	Family	Pseudoalteromonadaceae	14	0.00162097
3	X3	Family	Clostridiaceae	7	0.000810484
3	X3	Family	Rivulariaceae	3	0.00034735
3	X3	Family	Peptococcaceae	33	0.00382085
3	X3	Family	Bdellovibrionaceae	18	0.0020841
3	X3	Family	Kiloniellaceae	3	0.00034735
3	X3	Family	Ectothiorhodospiraceae	5	0.000578917
3	X3	Family	Vibrionaceae	2	0.000231567
3	X3	Family	Mycoplasmataceae	10	0.00115783
3	X3	Family	Hydrogenophilaceae	6	0.0006947
3	X3	Family	Desulfonatronumaceae	5	0.000578917
3	X3	Family	Aeromonadaceae	16	0.00185253
3	X3	Family	Desulfovibrionaceae	7	0.000810484
3	X3	Family	Porphyromonadaceae	12	0.0013894
3	X3	Family	Thiotrichaceae	6	0.0006947
3	X3	Family	Lactobacillaceae	1	0.000115783
3	X3	Family	Campylobacteraceae	9	0.00104205
3	X3	Family	Spirochaetaceae	1	0.000115783
3	X3	Family	Burkholderiaceae	25	0.00289458
3	X3	Family	Legionellaceae	3	0.00034735
3	X3	Family	Gallionellaceae	2	0.000231567
3	X3	Family	Bartonellaceae	2	0.000231567
3	X3	Family	Thermaceae	3	0.00034735
3	X3	Family	Acetobacteraceae	14	0.00162097
3	X3	Family	Francisellaceae	10	0.00115783
3	X3	Family	Pseudanabaenaceae	2	0.000231567
3	X3	Family	Thiohalorhabdaceae	4	0.000463133
3	X3	Family	Phyllobacteriaceae	4	0.000463133
3	X3	Family	Methylocystaceae	8	0.000926267
3	X3	Family	Bacillaceae	2	0.000231567
3	X3	Family	Rhabdochlamydiaceae	4	0.000463133
3	X3	Family	Chrysiogenaceae	5	0.000578917
3	X3	Family	Brevibacteriaceae	1	0.000115783
3	X3	Family	Bacteroidaceae	1	0.000115783
3	X3	Family	Thermodesulfovibrionaceae	6	0.0006947
3	X3	Family	Planococcaceae	1	0.000115783
3	X3	Family	Pseudonocardiaceae	1	0.000115783
3	X3	Family	Piscirickettsiaceae	1	0.000115783
3	X3	Family	Anaerolinaceae	3	0.00034735
3	X3	Family	Caldilineaceae	2	0.000231567
3	X3	Family	Acidobacteriaceae	4	0.000463133
3	X3	Family	Streptosporangiaceae	1	0.000115783
3	X3	Family	Idiomarinaceae	1	0.000115783
3	X3	Family	Nannocystaceae	1	0.000115783
3	X3	Family	Syntrophobacteraceae	5	0.000578917
3	X3	Family	Streptomycetaceae	3	0.00034735
3	X3	Family	Chlorobiaceae	1	0.000115783
3	X3	Family	Beijerinckiaceae	5	0.000578917
3	X3	Family	Mycobacteriaceae	1	0.000115783
3	X3	Family	Moritellaceae	1	0.000115783
3	X3	Family	Ferrimonadaceae	1	0.000115783
3	X3	Family	Glycomycetaceae	1	0.000115783
3	X3	Family	Thermicanaceae	1	0.000115783
3	X3	Family	Deferribacteraceae	1	0.000115783
3	X3	Family	Sulfobacillaceae	1	0.000115783
3	X3	Family	Paenibacillaceae	1	0.000115783
3	X3	Family	Chromatiaceae	1	0.000115783
3	X3	Family	Methylophilaceae	1	0.000115783
3	X3	Genus	Unclassified	77529	8.97657
3	X3	Genus	Candidatus Amoebophilus	622224	72.0432
3	X3	Genus	Pseudomonas	14199	1.64401
3	X3	Genus	Gemmata	32600	3.77454
3	X3	Genus	Segetibacter	55693	6.44832
3	X3	Genus	Chryseobacterium	744	0.0861428
3	X3	Genus	Giesbergeria	2226	0.257734
3	X3	Genus	Rhodoferax	1200	0.13894
3	X3	Genus	Dokdonella	636	0.0736382
3	X3	Genus	Chitinophaga	13265	1.53587
3	X3	Genus	Hyphomonas	1113	0.128867
3	X3	Genus	Flavobacterium	384	0.0444608
3	X3	Genus	Megasphaera	915	0.105942
3	X3	Genus	Hydrogenophaga	393	0.0455029
3	X3	Genus	Pedobacter	3411	0.394937
3	X3	Genus	Agrobacterium	114	0.0131993
3	X3	Genus	Hyphomicrobium	2201	0.254839
3	X3	Genus	Delftia	5531	0.640398
3	X3	Genus	Marinobacter	423	0.0489764
3	X3	Genus	Pirellula	6321	0.731867
3	X3	Genus	Oxalobacter	2144	0.24824
3	X3	Genus	Ancylobacter	351	0.04064
3	X3	Genus	Elizabethkingia	3843	0.444955
3	X3	Genus	Acidovorax	639	0.0739856
3	X3	Genus	Flavisolibacter	1166	0.135003
3	X3	Genus	Thermogemmatispora	305	0.0353139
3	X3	Genus	Stenotrophomonas	861	0.0996895
3	X3	Genus	Myroides	255	0.0295247
3	X3	Genus	Luteimonas	386	0.0446924
3	X3	Genus	Pelomonas	129	0.014936
3	X3	Genus	Limnobacter	1194	0.138245
3	X3	Genus	Candidatus Protochlamydia	1291	0.149476
3	X3	Genus	Polaromonas	18	0.0020841
3	X3	Genus	Pectinatus	482	0.0558076
3	X3	Genus	Waddlia	10	0.00115783
3	X3	Genus	Brevundimonas	214	0.0247776
3	X3	Genus	Arthrospira	1843	0.213389
3	X3	Genus	Planctomyces	267	0.0309142
3	X3	Genus	Chromobacterium	951	0.11011
3	X3	Genus	Sphingobacterium	602	0.0697016
3	X3	Genus	Xanthomonas	45	0.00521025
3	X3	Genus	Aquitalea	192	0.0222304
3	X3	Genus	Microbacterium	289	0.0334614
3	X3	Genus	Bradyrhizobium	354	0.0409873
3	X3	Genus	Microvirus	63	0.00729435
3	X3	Genus	Aequorivita	1	0.000115783
3	X3	Genus	Lachnospira	1	0.000115783
3	X3	Genus	Helicobacter	18	0.0020841
3	X3	Genus	Enterobacter	1141	0.132109
3	X3	Genus	Vogesella	37	0.00428398
3	X3	Genus	Paracoccus	93	0.0107679
3	X3	Genus	Hymenobacter	37	0.00428398
3	X3	Genus	Pedomicrobium	163	0.0188727
3	X3	Genus	Singulisphaera	137	0.0158623
3	X3	Genus	Macrococcus	171	0.0197989
3	X3	Genus	Shewanella	79	0.00914689
3	X3	Genus	Staphylococcus	489	0.0566181
3	X3	Genus	Janthinobacterium	117	0.0135467
3	X3	Genus	Azohydromonas	11	0.00127362
3	X3	Genus	Comamonas	143	0.016557
3	X3	Genus	Neorickettsia	15	0.00173675
3	X3	Genus	Rhizobium	68	0.00787327
3	X3	Genus	Variovorax	32	0.00370507
3	X3	Genus	Borrelia	1	0.000115783
3	X3	Genus	Sphingomonas	21	0.00243145
3	X3	Genus	Ralstonia	4	0.000463133
3	X3	Genus	Methylobacterium	53	0.00613652
3	X3	Genus	Rickettsia	165	0.0191042
3	X3	Genus	Phaeobacter	28	0.00324193
3	X3	Genus	Desulfomonile	19	0.00219988
3	X3	Genus	Curvibacter	81	0.00937845
3	X3	Genus	Methyloversatilis	96	0.0111152
3	X3	Genus	Brenneria	26	0.00301037
3	X3	Genus	Niabella	30	0.0034735
3	X3	Genus	Candidatus Phytoplasma	76	0.00879954
3	X3	Genus	Bifidobacterium	57	0.00659965
3	X3	Genus	Stenoxybacter	3	0.00034735
3	X3	Genus	Roseospira	90	0.0104205
3	X3	Genus	Rhodospirillum	31	0.00358928
3	X3	Genus	Rubrivivax	18	0.0020841
3	X3	Genus	Devosia	105	0.0121572
3	X3	Genus	Nevskia	157	0.018178
3	X3	Genus	Candidatus Scalindua	13	0.00150518
3	X3	Genus	Hydrocarboniphaga	3	0.00034735
3	X3	Genus	Candidatus Liberibacter	29	0.00335772
3	X3	Genus	Marinomonas	11	0.00127362
3	X3	Genus	Tenacibaculum	6	0.0006947
3	X3	Genus	Acinetobacter	1	0.000115783
3	X3	Genus	Leucobacter	6	0.0006947
3	X3	Genus	Deinococcus	2	0.000231567
3	X3	Genus	Bergeyella	1	0.000115783
3	X3	Genus	Enterococcus	9	0.00104205
3	X3	Genus	Polaribacter	5	0.000578917
3	X3	Genus	Trabulsiella	8	0.000926267
3	X3	Genus	Niastella	30	0.0034735
3	X3	Genus	Lewinella	15	0.00173675
3	X3	Genus	Mesoplasma	1	0.000115783
3	X3	Genus	Paucibacter	85	0.00984159
3	X3	Genus	Ochrobactrum	1	0.000115783
3	X3	Genus	Litoricola	24	0.0027788
3	X3	Genus	Propionibacterium	35	0.00405242
3	X3	Genus	Actinopolymorpha	1	0.000115783
3	X3	Genus	Caldicellulosiruptor	4	0.000463133
3	X3	Genus	Leptothrix	14	0.00162097
3	X3	Genus	Desulfosarcina	2	0.000231567
3	X3	Genus	Pseudoalteromonas	14	0.00162097
3	X3	Genus	Polynucleobacter	9	0.00104205
3	X3	Genus	Azospirillum	8	0.000926267
3	X3	Genus	Calothrix	3	0.00034735
3	X3	Genus	Maricaulis	1	0.000115783
3	X3	Genus	Desulfotomaculum	3	0.00034735
3	X3	Genus	Bdellovibrio	18	0.0020841
3	X3	Genus	Marinospirillum	8	0.000926267
3	X3	Genus	Candidatus Blochmannia	13	0.00150518
3	X3	Genus	Thalassospira	3	0.00034735
3	X3	Genus	Methylonatrum	1	0.000115783
3	X3	Genus	Thiomonas	10	0.00115783
3	X3	Genus	Vibrio	2	0.000231567
3	X3	Genus	Rhodobacter	17	0.00196832
3	X3	Genus	Mycoplasma	10	0.00115783
3	X3	Genus	Thiobacillus	6	0.0006947
3	X3	Genus	Ehrlichia	6	0.0006947
3	X3	Genus	Pelotomaculum	29	0.00335772
3	X3	Genus	Desulfonatronum	5	0.000578917
3	X3	Genus	Tolumonas	16	0.00185253
3	X3	Genus	Desulfovibrio	7	0.000810484
3	X3	Genus	Olivibacter	35	0.00405242
3	X3	Genus	Sphingobium	12	0.0013894
3	X3	Genus	Porphyromonas	10	0.00115783
3	X3	Genus	Phenylobacterium	9	0.00104205
3	X3	Genus	Lysobacter	2	0.000231567
3	X3	Genus	Salinicoccus	13	0.00150518
3	X3	Genus	Thiothrix	6	0.0006947
3	X3	Genus	Achromobacter	12	0.0013894
3	X3	Genus	Pediococcus	1	0.000115783
3	X3	Genus	Campylobacter	9	0.00104205
3	X3	Genus	Serratia	2	0.000231567
3	X3	Genus	Treponema	1	0.000115783
3	X3	Genus	Novosphingobium	2	0.000231567
3	X3	Genus	Herbaspirillum	4	0.000463133
3	X3	Genus	Agrococcus	3	0.00034735
3	X3	Genus	Mitsuaria	6	0.0006947
3	X3	Genus	Candidatus Glomeribacter	6	0.0006947
3	X3	Genus	Legionella	3	0.00034735
3	X3	Genus	Runella	16	0.00185253
3	X3	Genus	Caulobacter	6	0.0006947
3	X3	Genus	Providencia	1	0.000115783
3	X3	Genus	Gallionella	2	0.000231567
3	X3	Genus	Bartonella	2	0.000231567
3	X3	Genus	Thermus	2	0.000231567
3	X3	Genus	Burkholderia	15	0.00173675
3	X3	Genus	Pigmentiphaga	2	0.000231567
3	X3	Genus	Gluconobacter	11	0.00127362
3	X3	Genus	Emticicia	4	0.000463133
3	X3	Genus	Francisella	10	0.00115783
3	X3	Genus	Leptolyngbya	1	0.000115783
3	X3	Genus	Ectothiorhodospira	2	0.000231567
3	X3	Genus	Thiohalorhabdus	4	0.000463133
3	X3	Genus	Tepidimonas	3	0.00034735
3	X3	Genus	Mesorhizobium	3	0.00034735
3	X3	Genus	Methylosinus	8	0.000926267
3	X3	Genus	Aquimonas	2	0.000231567
3	X3	Genus	Deefgea	2	0.000231567
3	X3	Genus	Bacillus	2	0.000231567
3	X3	Genus	Candidatus Endobugula	1	0.000115783
3	X3	Genus	Haloanella	2	0.000231567
3	X3	Genus	Candidatus Rhabdochlamydia	4	0.000463133
3	X3	Genus	Desulfurispirillum	5	0.000578917
3	X3	Genus	Lautropia	3	0.00034735
3	X3	Genus	Denitratisoma	4	0.000463133
3	X3	Genus	Brevibacterium	1	0.000115783
3	X3	Genus	Bacteroides	1	0.000115783
3	X3	Genus	Thermodesulfovibrio	6	0.0006947
3	X3	Genus	Clostridium	2	0.000231567
3	X3	Genus	Dickeya	3	0.00034735
3	X3	Genus	Dechloromonas	3	0.00034735
3	X3	Genus	Sporosarcina	1	0.000115783
3	X3	Genus	Xanthobacter	2	0.000231567
3	X3	Genus	Halomonas	3	0.00034735
3	X3	Genus	Isosphaera	1	0.000115783
3	X3	Genus	Amaricoccus	2	0.000231567
3	X3	Genus	Blastochloris	1	0.000115783
3	X3	Genus	Saccharopolyspora	1	0.000115783
3	X3	Genus	Thioalkalimicrobium	1	0.000115783
3	X3	Genus	Bellilinea	3	0.00034735
3	X3	Genus	Klebsiella	2	0.000231567
3	X3	Genus	Kushneria	1	0.000115783
3	X3	Genus	Meiothermus	1	0.000115783
3	X3	Genus	Dyadobacter	1	0.000115783
3	X3	Genus	Caldilinea	2	0.000231567
3	X3	Genus	Gillisia	2	0.000231567
3	X3	Genus	Agromyces	1	0.000115783
3	X3	Genus	Edaphobacter	4	0.000463133
3	X3	Genus	Propionivibrio	1	0.000115783
3	X3	Genus	Phyllobacterium	1	0.000115783
3	X3	Genus	Halorhodospira	1	0.000115783
3	X3	Genus	Microbulbifer	1	0.000115783
3	X3	Genus	Psychroflexus	1	0.000115783
3	X3	Genus	Blautia	2	0.000231567
3	X3	Genus	Azorhizobium	3	0.00034735
3	X3	Genus	Labrys	1	0.000115783
3	X3	Genus	Pseudidiomarina	1	0.000115783
3	X3	Genus	Skermanella	1	0.000115783
3	X3	Genus	Rhodocyclus	1	0.000115783
3	X3	Genus	Bosea	3	0.00034735
3	X3	Genus	Nannocystis	1	0.000115783
3	X3	Genus	Psychrobacter	5	0.000578917
3	X3	Genus	Streptomyces	3	0.00034735
3	X3	Genus	Pontibacter	1	0.000115783
3	X3	Genus	Chlorobaculum	1	0.000115783
3	X3	Genus	Zhouia	1	0.000115783
3	X3	Genus	Roseomonas	1	0.000115783
3	X3	Genus	Methylibium	1	0.000115783
3	X3	Genus	Candidatus Phlomobacter	1	0.000115783
3	X3	Genus	Methylocella	5	0.000578917
3	X3	Genus	Mycobacterium	1	0.000115783
3	X3	Genus	Dysgonomonas	2	0.000231567
3	X3	Genus	Caloramator	1	0.000115783
3	X3	Genus	Acholeplasma	1	0.000115783
3	X3	Genus	Moritella	1	0.000115783
3	X3	Genus	Ferrimonas	1	0.000115783
3	X3	Genus	Ruegeria	1	0.000115783
3	X3	Genus	Thermoanaerobacterium	1	0.000115783
3	X3	Genus	Glycomyces	1	0.000115783
3	X3	Genus	Thermicanus	1	0.000115783
3	X3	Genus	Deferribacter	1	0.000115783
3	X3	Genus	Sulfobacillus	1	0.000115783
3	X3	Genus	Thiorhodospira	1	0.000115783
3	X3	Genus	Paenibacillus	1	0.000115783
3	X3	Genus	Asticcacaulis	2	0.000231567
3	X3	Genus	Oligella	1	0.000115783
3	X3	Genus	Shinella	1	0.000115783
3	X3	Genus	Alkaliphilus	1	0.000115783
3	X3	Genus	Thiocapsa	1	0.000115783
3	X3	Genus	Methylobacillus	1	0.000115783
3	X3	Species	Unclassified	128595	14.8892
3	X3	Species	Candidatus Amoebophilus asiaticus	622224	72.0432
3	X3	Species	Pseudomonas brenneri	10504	1.21619
3	X3	Species	Pseudomonas migulae	19	0.00219988
3	X3	Species	Segetibacter aerophilus	55693	6.44832
3	X3	Species	Rhodoferax antarcticus	1073	0.124235
3	X3	Species	Dokdonella fugitiva	115	0.0133151
3	X3	Species	Chitinophaga soli	13261	1.5354
3	X3	Species	Flavobacterium swingsii	331	0.0383243
3	X3	Species	Megasphaera hominis	915	0.105942
3	X3	Species	Hydrogenophaga defluvii	393	0.0455029
3	X3	Species	Delftia lacustris	4669	0.540593
3	X3	Species	Marinobacter arcticus	415	0.0480501
3	X3	Species	Pirellula staleyi	6260	0.724804
3	X3	Species	Oxalobacter vibrioformis	2144	0.24824
3	X3	Species	Hyphomicrobium aestuarii	136	0.0157465
3	X3	Species	Elizabethkingia meningoseptica	3825	0.442871
3	X3	Species	Acidovorax anthurii	17	0.00196832
3	X3	Species	Flavisolibacter ginsengisoli	1166	0.135003
3	X3	Species	Stenotrophomonas geniculata	96	0.0111152
3	X3	Species	Myroides odoratus	234	0.0270933
3	X3	Species	Chryseobacterium indologenes	513	0.0593969
3	X3	Species	Pelomonas saccharophila	14	0.00162097
3	X3	Species	Pseudomonas moraviensis	495	0.0573128
3	X3	Species	Candidatus Protochlamydia amoebophila	1279	0.148087
3	X3	Species	Chryseobacterium culicis	1	0.000115783
3	X3	Species	Pectinatus cerevisiiphilus	482	0.0558076
3	X3	Species	Arthrospira fusiformis	1446	0.167423
3	X3	Species	Planctomyces limnophilus	267	0.0309142
3	X3	Species	Delftia tsuruhatensis	495	0.0573128
3	X3	Species	Pseudomonas tremae	164	0.0189885
3	X3	Species	Pseudomonas veronii	290	0.0335772
3	X3	Species	Sphingobacterium shayense	582	0.0673859
3	X3	Species	Xanthomonas oryzae	35	0.00405242
3	X3	Species	Aquitalea denitrificans	192	0.0222304
3	X3	Species	Microbacterium chocolatum	133	0.0153992
3	X3	Species	Microvirus Enterobacteria phage PhiX174	63	0.00729435
3	X3	Species	Aequorivita lipolytica	1	0.000115783
3	X3	Species	Stenotrophomonas maltophilia	87	0.0100731
3	X3	Species	Lachnospira pectinoschiza	1	0.000115783
3	X3	Species	Vogesella perlucida	26	0.00301037
3	X3	Species	Paracoccus kamogawaensis	91	0.0105363
3	X3	Species	Pseudomonas marginalis	662	0.0766486
3	X3	Species	Enterobacter amnigenus	263	0.030451
3	X3	Species	Enterobacter hormaechei	809	0.0936687
3	X3	Species	Acidovorax wohlfahrtii	599	0.0693542
3	X3	Species	Hyphomicrobium vulgare	6	0.0006947
3	X3	Species	Agrobacterium tumefaciens	72	0.0083364
3	X3	Species	Brevundimonas staleyi	165	0.0191042
3	X3	Species	Janthinobacterium agaricidamnosum	117	0.0135467
3	X3	Species	Comamonas kerstersii	48	0.0055576
3	X3	Species	Neorickettsia helminthoeca	15	0.00173675
3	X3	Species	Enterobacter soli	12	0.0013894
3	X3	Species	Limnobacter thiooxidans	147	0.0170202
3	X3	Species	Rhizobium pisi	47	0.00544182
3	X3	Species	Variovorax boronicumulans	31	0.00358928
3	X3	Species	Pseudomonas collierea	298	0.0345034
3	X3	Species	Delftia acidovorans	45	0.00521025
3	X3	Species	Pseudomonas teessidea	50	0.00578917
3	X3	Species	Limnobacter litoralis	15	0.00173675
3	X3	Species	Comamonas nitrativorans	54	0.0062523
3	X3	Species	Pseudomonas proteolytica	19	0.00219988
3	X3	Species	Ralstonia insidiosa	3	0.00034735
3	X3	Species	Pedomicrobium manganicum	60	0.006947
3	X3	Species	Pseudomonas lini	2	0.000231567
3	X3	Species	Pelomonas puraquae	11	0.00127362
3	X3	Species	Brevundimonas terrae	4	0.000463133
3	X3	Species	Flavobacterium terrigena	1	0.000115783
3	X3	Species	Desulfomonile tiedjei	19	0.00219988
3	X3	Species	Curvibacter gracilis	78	0.0090311
[truncated: 11,546 more rows]

## Sheet: Figure 1-source data 1D
SampleNumber	SampleName	Level	Group	Reads	Percentage
1	A1	Kingdom	Unclassified	88110	7.25961
1	A1	Kingdom	Bacteria	1125452	92.7289
1	A1	Kingdom	Viruses	140	0.011535
1	A1	Phylum	Unclassified	92758	7.64257
1	A1	Phylum	Firmicutes	801588	66.0449
1	A1	Phylum	Actinobacteria	24314	2.00329
1	A1	Phylum	Proteobacteria	274832	22.6441
1	A1	Phylum	Bacteroidetes	11389	0.938369
1	A1	Phylum	Planctomycetes	3074	0.253275
1	A1	Phylum	Verrucomicrobia	2310	0.190327
1	A1	Phylum	Cyanobacteria	1591	0.131086
1	A1	Phylum	Spirochaetes	49	0.00403724
1	A1	Phylum	Tenericutes	836	0.0688802
1	A1	Phylum	Thermotogae	162	0.0133476
1	A1	Phylum	Fusobacteria	323	0.0266128
1	A1	Phylum	Chloroflexi	111	0.00914557
1	A1	Phylum	DNA	140	0.011535
1	A1	Phylum	Chlamydiae	83	0.00683858
1	A1	Phylum	Thermi	75	0.00617944
1	A1	Phylum	Deferribacteres	6	0.000494355
1	A1	Phylum	Thermodesulfobacteria	26	0.00214221
1	A1	Phylum	Acidobacteria	13	0.0010711
1	A1	Phylum	Nitrospirae	8	0.00065914
1	A1	Phylum	Chrysiogenetes	5	0.000411963
1	A1	Phylum	Synergistetes	7	0.000576748
1	A1	Phylum	Caldithrix	2	0.000164785
1	A1	Class	Unclassified	100301	8.26406
1	A1	Class	Bacilli	797440	65.7031
1	A1	Class	Actinobacteria	24246	1.99769
1	A1	Class	Betaproteobacteria	197429	16.2667
1	A1	Class	Clostridia	2922	0.240751
1	A1	Class	Gammaproteobacteria	60631	4.99554
1	A1	Class	Alphaproteobacteria	9456	0.779104
1	A1	Class	Flavobacteriia	3470	0.285902
1	A1	Class	Deltaproteobacteria	1218	0.100354
1	A1	Class	Sphingobacteriia	7757	0.639119
1	A1	Class	Planctomycetia	2912	0.239927
1	A1	Class	Spartobacteria	53	0.0043668
1	A1	Class	Nostocophycideae	883	0.0727526
1	A1	Class	Oscillatoriophycideae	426	0.0350992
1	A1	Class	Synechococcophycideae	22	0.00181264
1	A1	Class	Verrucomicrobiae	1464	0.120623
1	A1	Class	Epsilonproteobacteria	226	0.0186207
1	A1	Class	Bacteroidia	27	0.0022246
1	A1	Class	Spirochaetes	32	0.00263656
1	A1	Class	Pedosphaerae	188	0.0154898
1	A1	Class	Mollicutes	836	0.0688802
1	A1	Class	Thermotogae	162	0.0133476
1	A1	Class	Fusobacteria	323	0.0266128
1	A1	Class	Anaerolineae	53	0.0043668
1	A1	Class	Methylacidiphilae	397	0.0327098
1	A1	Class	Group II	140	0.011535
1	A1	Class	Ktedonobacteria	46	0.00379006
1	A1	Class	Chlamydiia	83	0.00683858
1	A1	Class	Chloroflexi	4	0.00032957
1	A1	Class	Opitutae	179	0.0147483
1	A1	Class	Deinococci	75	0.00617944
1	A1	Class	Brocadiae	159	0.0131004
1	A1	Class	Deferribacteres	6	0.000494355
1	A1	Class	Acidimicrobiia	9	0.000741533
1	A1	Class	Thermodesulfobacteria	26	0.00214221
1	A1	Class	Acidobacteria	13	0.0010711
1	A1	Class	Nitrospira	8	0.00065914
1	A1	Class	Nitriliruptoria	35	0.00288374
1	A1	Class	Leptospirae	15	0.00123589
1	A1	Class	Chrysiogenetes	5	0.000411963
1	A1	Class	Erysipelotrichi	12	0.000988711
1	A1	Class	Brachyspirae	2	0.000164785
1	A1	Class	Synergistia	7	0.000576748
1	A1	Class	Caldithrixae	2	0.000164785
1	A1	Class	Thermobacula	2	0.000164785
1	A1	Order	Unclassified	113350	9.3392
1	A1	Order	Lactobacillales	406369	33.4818
1	A1	Order	Bacillales	387891	31.9593
1	A1	Order	Actinomycetales	23580	1.94282
1	A1	Order	Burkholderiales	180536	14.8748
1	A1	Order	Clostridiales	2284	0.188185
1	A1	Order	Thiotrichales	45758	3.77012
1	A1	Order	Rhodospirillales	1752	0.144352
1	A1	Order	Neisseriales	10012	0.824914
1	A1	Order	Flavobacteriales	3470	0.285902
1	A1	Order	Myxococcales	544	0.0448216
1	A1	Order	Sphingobacteriales	7757	0.639119
1	A1	Order	Gemmatales	1316	0.108429
1	A1	Order	Sphingomonadales	3315	0.273131
1	A1	Order	Chthoniobacterales	53	0.0043668
1	A1	Order	Planctomycetales	1464	0.120623
1	A1	Order	Rhodobacterales	1806	0.148801
1	A1	Order	Chroococcales	426	0.0350992
1	A1	Order	Caulobacterales	529	0.0435857
1	A1	Order	Pseudanabaenales	22	0.00181264
1	A1	Order	Rhizobiales	1361	0.112136
1	A1	Order	Pseudomonadales	2674	0.220318
1	A1	Order	Methylococcales	201	0.0165609
1	A1	Order	Rhodocyclales	1049	0.0864298
1	A1	Order	Alteromonadales	1484	0.122271
1	A1	Order	Chromatiales	928	0.0764603
1	A1	Order	Desulfuromonadales	78	0.00642662
1	A1	Order	Enterobacteriales	2080	0.171376
1	A1	Order	Rickettsiales	292	0.0240586
1	A1	Order	Oceanospirillales	850	0.0700337
1	A1	Order	Xanthomonadales	1486	0.122435
1	A1	Order	Methylophilales	409	0.0336986
1	A1	Order	Verrucomicrobiales	1464	0.120623
1	A1	Order	Gallionellales	141	0.0116174
1	A1	Order	Nostocales	677	0.0557798
1	A1	Order	Campylobacterales	226	0.0186207
1	A1	Order	Stigonematales	201	0.0165609
1	A1	Order	Coriobacteriales	44	0.00362527
1	A1	Order	Thermicanales	50	0.00411963
1	A1	Order	Bifidobacteriales	601	0.0495179
1	A1	Order	Bacteroidales	27	0.0022246
1	A1	Order	Borreliales	16	0.00131828
1	A1	Order	Pedosphaerales	188	0.0154898
1	A1	Order	Mycoplasmatales	674	0.0555326
1	A1	Order	Aeromonadales	472	0.0388893
1	A1	Order	Thermotogales	162	0.0133476
1	A1	Order	Desulfovibrionales	226	0.0186207
1	A1	Order	Exiguobacterales	132	0.0108758
1	A1	Order	Kiloniellales	49	0.00403724
1	A1	Order	Legionellales	267	0.0219988
1	A1	Order	Fusobacteriales	323	0.0266128
1	A1	Order	Acholeplasmatales	147	0.0121117
1	A1	Order	Anaerolineales	46	0.00379006
1	A1	Order	Methylacidiphilales	397	0.0327098
1	A1	Order	Vibrionales	425	0.0350168
1	A1	Order	(Microviridae)	140	0.011535
1	A1	Order	Thermogemmatisporales	46	0.00379006
1	A1	Order	Chlamydiales	83	0.00683858
1	A1	Order	Roseiflexales	4	0.00032957
1	A1	Order	Opitutales	108	0.00889839
1	A1	Order	Syntrophobacterales	107	0.008816
1	A1	Order	Puniceicoccales	17	0.00140067
1	A1	Order	Bdellovibrionales	242	0.019939
1	A1	Order	Pelagicoccales	42	0.00346049
1	A1	Order	Pirellulales	86	0.00708576
1	A1	Order	Deinococcales	12	0.000988711
1	A1	Order	Brocadiales	159	0.0131004
1	A1	Order	Deferribacterales	6	0.000494355
1	A1	Order	Acidimicrobiales	9	0.000741533
1	A1	Order	Hydrogenophilales	113	0.00931036
1	A1	Order	Thermoanaerobacterales	125	0.0102991
1	A1	Order	Thermales	63	0.00519073
1	A1	Order	Thiohalorhabdales	15	0.00123589
1	A1	Order	Halanaerobiales	68	0.00560269
1	A1	Order	Thermodesulfobacteriales	26	0.00214221
1	A1	Order	Acidobacteriales	13	0.0010711
1	A1	Order	Nitrospirales	8	0.00065914
1	A1	Order	Euzebyales	35	0.00288374
1	A1	Order	Natranaerobiales	4	0.00032957
1	A1	Order	Leptospirales	15	0.00123589
1	A1	Order	Chrysiogenales	5	0.000411963
1	A1	Order	Spirochaetales	15	0.00123589
1	A1	Order	Erysipelotrichales	12	0.000988711
1	A1	Order	Caldilineales	7	0.000576748
1	A1	Order	Brachyspirales	2	0.000164785
1	A1	Order	Synergistales	7	0.000576748
1	A1	Order	Pasteurellales	7	0.000576748
1	A1	Order	Entomoplasmatales	9	0.000741533
1	A1	Order	Caldithrixales	2	0.000164785
1	A1	Order	Gemellales	3	0.000247178
1	A1	Order	Thermobaculales	2	0.000164785
1	A1	Order	Anaeroplasmatales	4	0.00032957
1	A1	Family	Unclassified	156861	12.9242
1	A1	Family	Streptococcaceae	157968	13.0154
1	A1	Family	Leuconostocaceae	40583	3.34374
1	A1	Family	Listeriaceae	379336	31.2545
1	A1	Family	Staphylococcaceae	538	0.0443272
1	A1	Family	Carnobacteriaceae	100174	8.25359
1	A1	Family	Actinomycetaceae	22236	1.83208
1	A1	Family	Comamonadaceae	171053	14.0935
1	A1	Family	Bacillaceae	3589	0.295707
1	A1	Family	Lactobacillaceae	97133	8.00304
1	A1	Family	Lachnospiraceae	183	0.0150778
1	A1	Family	Acetobacteraceae	974	0.0802503
1	A1	Family	Neisseriaceae	10012	0.824914
1	A1	Family	Thiotrichaceae	10081	0.830599
1	A1	Family	Planococcaceae	266	0.0219164
1	A1	Family	Flavobacteriaceae	3470	0.285902
1	A1	Family	Cystobacteraceae	171	0.0140891
1	A1	Family	Chitinophagaceae	2429	0.200131
1	A1	Family	Alcaligenaceae	965	0.0795088
1	A1	Family	Gemmataceae	1052	0.086677
1	A1	Family	Piscirickettsiaceae	2768	0.228063
1	A1	Family	Erythrobacteraceae	99	0.00815686
1	A1	Family	Chthoniobacteraceae	53	0.0043668
1	A1	Family	Nocardioidaceae	167	0.0137596
1	A1	Family	Planctomycetaceae	1464	0.120623
1	A1	Family	Rhodobacteraceae	1784	0.146988
1	A1	Family	Enterococcaceae	7897	0.650654
1	A1	Family	Phormidiaceae	20	0.00164785
1	A1	Family	Caulobacteraceae	529	0.0435857
1	A1	Family	Pseudanabaenaceae	22	0.00181264
1	A1	Family	Rhodothermaceae	48	0.00395484
1	A1	Family	Clostridiaceae	948	0.0781081
1	A1	Family	Xanthobacteraceae	879	0.0724231
1	A1	Family	Sphingomonadaceae	3211	0.264562
1	A1	Family	Rhodospirillaceae	737	0.0607233
1	A1	Family	Paenibacillaceae	1575	0.129768
1	A1	Family	Streptomycetaceae	140	0.011535
1	A1	Family	Glycomycetaceae	98	0.00807447
1	A1	Family	Flexibacteraceae	569	0.0468814
1	A1	Family	Pseudomonadaceae	1826	0.150449
1	A1	Family	Methylococcaceae	196	0.0161489
1	A1	Family	Rhodocyclaceae	1049	0.0864298
1	A1	Family	Moraxellaceae	847	0.0697865
1	A1	Family	Shewanellaceae	403	0.0332042
1	A1	Family	Oxalobacteraceae	3139	0.25863
1	A1	Family	Alteromonadaceae	463	0.0381478
1	A1	Family	Amoebophilaceae	4047	0.333443
1	A1	Family	Chromatiaceae	1166	0.0960697
1	A1	Family	Aerococcaceae	620	0.0510834
1	A1	Family	Pseudonocardiaceae	156	0.0128532
1	A1	Family	Burkholderiaceae	1256	0.103485
1	A1	Family	Geobacteraceae	24	0.00197742
1	A1	Family	Enterobacteriaceae	2080	0.171376
1	A1	Family	Anaplasmataceae	93	0.00766251
1	A1	Family	Desulfuromonadaceae	27	0.0022246
1	A1	Family	Litoricolaceae	308	0.0253769
1	A1	Family	Xanthomonadaceae	1115	0.0918677
1	A1	Family	Methylophilaceae	409	0.0336986
1	A1	Family	Halomonadaceae	377	0.031062
1	A1	Family	Verrucomicrobiaceae	1464	0.120623
1	A1	Family	Gallionellaceae	141	0.0116174
1	A1	Family	Sphingobacteriaceae	257	0.0211749
1	A1	Family	Nostocaceae	677	0.0557798
1	A1	Family	Sporolactobacillaceae	125	0.0102991
1	A1	Family	Rivulariaceae	201	0.0165609
1	A1	Family	Coriobacteriaceae	44	0.00362527
1	A1	Family	Thermicanaceae	50	0.00411963
1	A1	Family	Bifidobacteriaceae	601	0.0495179
1	A1	Family	Porphyromonadaceae	18	0.00148307
1	A1	Family	Borreliaceae	16	0.00131828
1	A1	Family	Pedosphaeraceae	188	0.0154898
1	A1	Family	Mycoplasmataceae	674	0.0555326
1	A1	Family	Hyphomonadaceae	17	0.00140067
1	A1	Family	Aeromonadaceae	472	0.0388893
1	A1	Family	Thermotogaceae	162	0.0133476
1	A1	Family	Sinobacteraceae	370	0.0304852
1	A1	Family	Desulfohalobiaceae	16	0.00131828
1	A1	Family	Pseudoalteromonadaceae	56	0.00461398
1	A1	Family	Peptococcaceae	242	0.019939
1	A1	Family	Campylobacteraceae	127	0.0104639
1	A1	Family	Exiguobacteraceae	132	0.0108758
1	A1	Family	Kiloniellaceae	49	0.00403724
1	A1	Family	Legionellaceae	205	0.0168905
1	A1	Family	Fusobacteriaceae	307	0.0252945
1	A1	Family	Acholeplasmataceae	147	0.0121117
1	A1	Family	Haliangiaceae	208	0.0171377
1	A1	Family	Microbacteriaceae	174	0.0143363
1	A1	Family	Anaerolinaceae	46	0.00379006
1	A1	Family	Hyphomicrobiaceae	187	0.0154074
1	A1	Family	Methylacidiphilaceae	397	0.0327098
1	A1	Family	Vibrionaceae	425	0.0350168
1	A1	Family	Beijerinckiaceae	28	0.00230699
1	A1	Family	Microviridae	140	0.011535
1	A1	Family	Isosphaeraceae	263	0.0216692
1	A1	Family	Coxiellaceae	29	0.00238938
1	A1	Family	Bradyrhizobiaceae	29	0.00238938
1	A1	Family	Syntrophomonadaceae	24	0.00197742
1	A1	Family	Thermogemmatisporaceae	46	0.00379006
1	A1	Family	Oceanospirillaceae	114	0.00939275
1	A1	Family	Kineosporiaceae	75	0.00617944
1	A1	Family	Thermomonosporaceae	27	0.0022246
1	A1	Family	Propionibacteriaceae	252	0.0207629
1	A1	Family	Ectothiorhodospiraceae	63	0.00519073
1	A1	Family	Kouleothrixaceae	4	0.00032957
1	A1	Family	Opitutaceae	108	0.00889839
1	A1	Family	Syntrophaceae	67	0.0055203
1	A1	Family	Puniceicoccaceae	17	0.00140067
1	A1	Family	Bacteriovoracaceae	239	0.0196918
1	A1	Family	Micrococcaceae	20	0.00164785
1	A1	Family	Carboxydocellaceae	10	0.000823926
1	A1	Family	Pelagicoccaceae	42	0.00346049
1	A1	Family	Helicobacteraceae	66	0.00543791
1	A1	Family	Heliobacteriaceae	53	0.0043668
1	A1	Family	Symbiobacteriaceae	41	0.00337809
1	A1	Family	Desulfobacteraceae	35	0.00288374
1	A1	Family	Pirellulaceae	86	0.00708576
1	A1	Family	Rickettsiaceae	199	0.0163961
1	A1	Family	Deinococcaceae	12	0.000988711
1	A1	Family	Saprospiraceae	9	0.000741533
1	A1	Family	Desulfovibrionaceae	121	0.0099695
1	A1	Family	Brocadiaceae	159	0.0131004
1	A1	Family	Idiomarinaceae	98	0.00807447
1	A1	Family	Veillonellaceae	151	0.0124413
1	A1	Family	Polyangiaceae	143	0.0117821
1	A1	Family	Rhizobiaceae	154	0.0126885
1	A1	Family	Deferribacteraceae	6	0.000494355
1	A1	Family	Acidimicrobiaceae	9	0.000741533
1	A1	Family	Hydrogenophilaceae	113	0.00931036
1	A1	Family	Nannocystaceae	20	0.00164785
1	A1	Family	Thermoanaerobacteraceae	12	0.000988711
1	A1	Family	Ruminococcaceae	47	0.00387245
1	A1	Family	Thermoactinomycetaceae	26	0.00214221
1	A1	Family	Thermaceae	63	0.00519073
1	A1	Family	Thiohalorhabdaceae	15	0.00123589
1	A1	Family	Halanaerobiaceae	67	0.0055203
1	A1	Family	Desulfonatronumaceae	29	0.00238938
1	A1	Family	Psychromonadaceae	8	0.00065914
1	A1	Family	Thermodesulfobacteriaceae	26	0.00214221
1	A1	Family	Eubacteriaceae	15	0.00123589
1	A1	Family	Flammeovirgaceae	7	0.000576748
1	A1	Family	Acidobacteriaceae	13	0.0010711
1	A1	Family	Alcanivoracaceae	10	0.000823926
1	A1	Family	Mycobacteriaceae	11	0.000906318
1	A1	Family	Rhabdochlamydiaceae	14	0.0011535
1	A1	Family	Methylobacteriaceae	10	0.000823926
1	A1	Family	Micromonosporaceae	10	0.000823926
1	A1	Family	Thermodesulfovibrionaceae	8	0.00065914
1	A1	Family	Yaniellaceae	3	0.000247178
1	A1	Family	Euzebyaceae	35	0.00288374
1	A1	Family	Anaerobrancaceae	3	0.000247178
1	A1	Family	Moritellaceae	22	0.00181264
1	A1	Family	Syntrophobacteraceae	5	0.000411963
1	A1	Family	Leptospiraceae	15	0.00123589
1	A1	Family	Waddliaceae	6	0.000494355
1	A1	Family	Cellulomonadaceae	4	0.00032957
1	A1	Family	Caldicellulosiruptoraceae	46	0.00379006
1	A1	Family	Nocardiaceae	15	0.00123589
1	A1	Family	Actinosynnemataceae	4	0.00032957
1	A1	Family	Chrysiogenaceae	5	0.000411963
1	A1	Family	Bacteroidaceae	7	0.000576748
1	A1	Family	Leptotrichiaceae	8	0.00065914
1	A1	Family	Spirochaetaceae	15	0.00123589
1	A1	Family	Erysipelotrichaceae	12	0.000988711
1	A1	Family	Peptostreptococcaceae	20	0.00164785
1	A1	Family	Ferrimonadaceae	1	8.23926e-05
1	A1	Family	Caldilineaceae	7	0.000576748
1	A1	Family	Brevibacteriaceae	8	0.00065914
1	A1	Family	Brachyspiraceae	2	0.000164785
1	A1	Family	Actinopolysporaceae	4	0.00032957
1	A1	Family	Crenotrichaceae	5	0.000411963
1	A1	Family	Intrasporangiaceae	5	0.000411963
1	A1	Family	Dethiosulfovibrionaceae	3	0.000247178
1	A1	Family	Aminiphilaceae	2	0.000164785
1	A1	Family	Pasteurellaceae	7	0.000576748
1	A1	Family	Francisellaceae	33	0.00271895
1	A1	Family	Methylocystaceae	3	0.000247178
1	A1	Family	Streptosporangiaceae	3	0.000247178
1	A1	Family	Halobacteroidaceae	1	8.23926e-05
1	A1	Family	Entomoplasmataceae	9	0.000741533
1	A1	Family	Bdellovibrionaceae	3	0.000247178
1	A1	Family	Synergistaceae	2	0.000164785
1	A1	Family	Aurantimonadaceae	5	0.000411963
1	A1	Family	Phyllobacteriaceae	3	0.000247178
1	A1	Family	Sulfobacillaceae	2	0.000164785
1	A1	Family	Brucellaceae	6	0.000494355
1	A1	Family	Gomphosphaeriaceae	1	8.23926e-05
1	A1	Family	Saccharospirillaceae	1	8.23926e-05
1	A1	Family	Microcystaceae	2	0.000164785
1	A1	Family	Caldithrixaceae	2	0.000164785
1	A1	Family	Corynebacteriaceae	1	8.23926e-05
1	A1	Family	Contubernalisaceae	1	8.23926e-05
1	A1	Family	Gemellaceae	3	0.000247178
1	A1	Family	Bartonellaceae	3	0.000247178
1	A1	Family	Thermobaculaceae	2	0.000164785
1	A1	Family	Anaeroplasmataceae	4	0.00032957
1	A1	Family	Dermabacteraceae	1	8.23926e-05
1	A1	Family	Sanguibacteraceae	1	8.23926e-05
1	A1	Genus	Unclassified	327704	27.0004
1	A1	Genus	Lactococcus	156347	12.8818
1	A1	Genus	Leuconostoc	39487	3.25343
1	A1	Genus	Brochothrix	378454	31.1818
1	A1	Genus	Macrococcus	213	0.0175496
1	A1	Genus	Carnobacterium	99462	8.19493
1	A1	Genus	Giesbergeria	9881	0.814121
1	A1	Genus	Pontibacillus	696	0.0573452
1	A1	Genus	Lactobacillus	94618	7.79582
1	A1	Genus	Blautia	166	0.0136772
1	A1	Genus	Roseococcus	52	0.00428441
1	A1	Genus	Aquitalea	3330	0.274367
1	A1	Genus	Thiothrix	9878	0.813874
1	A1	Genus	Planomicrobium	39	0.00321331
1	A1	Genus	Listeria	806	0.0664084
1	A1	Genus	Flavobacterium	1772	0.146
1	A1	Genus	Rhodoferax	12321	1.01516
1	A1	Genus	Curvibacter	787	0.0648429
1	A1	Genus	Cystobacter	171	0.0140891
1	A1	Genus	Segetibacter	1375	0.11329
1	A1	Genus	Gemmata	1052	0.086677
1	A1	Genus	Hydrogenophaga	3633	0.299332
1	A1	Genus	Acidovorax	3760	0.309796
1	A1	Genus	Cycloclasticus	2721	0.22419
1	A1	Genus	Salinicoccus	33	0.00271895
1	A1	Genus	Erythrobacter	62	0.00510834
1	A1	Genus	Chthoniobacter	53	0.0043668
1	A1	Genus	Nocardioides	119	0.00980471
1	A1	Genus	Planctomyces	1464	0.120623
1	A1	Genus	Chromobacterium	4525	0.372826
1	A1	Genus	Vogesella	481	0.0396308
1	A1	Genus	Rhodobacter	1276	0.105133
1	A1	Genus	Vagococcus	868	0.0715167
1	A1	Genus	Enterococcus	2507	0.206558
1	A1	Genus	Deefgea	698	0.05751
1	A1	Genus	Asticcacaulis	54	0.0044492
1	A1	Genus	Arthronema	20	0.00164785
1	A1	Genus	Rhodothermus	48	0.00395484
1	A1	Genus	Trichococcus	640	0.0527312
1	A1	Genus	Clostridium	478	0.0393836
1	A1	Genus	Azorhizobium	576	0.0474581
1	A1	Genus	Myroides	132	0.0108758
1	A1	Genus	Novosphingobium	176	0.0145011
1	A1	Genus	Paenibacillus	1039	0.0856059
1	A1	Genus	Winogradskyella	65	0.00535552
1	A1	Genus	Anaerobacillus	90	0.00741533
1	A1	Genus	Alkaliphilus	188	0.0154898
1	A1	Genus	Streptomyces	134	0.0110406
1	A1	Genus	Elizabethkingia	1116	0.0919501
1	A1	Genus	Glycomyces	98	0.00807447
1	A1	Genus	Runella	55	0.00453159
1	A1	Genus	Chitinophaga	761	0.0627007
1	A1	Genus	Pseudomonas	1722	0.14188
1	A1	Genus	Comamonas	774	0.0637718
1	A1	Genus	Methylocaldum	196	0.0161489
1	A1	Genus	Sphingobium	1069	0.0880776
1	A1	Genus	Hymenobacter	424	0.0349344
1	A1	Genus	Streptococcus	1118	0.0921149
1	A1	Genus	Hydrogenophilus	18	0.00148307
1	A1	Genus	Psychrobacter	788	0.0649253
1	A1	Genus	Shewanella	403	0.0332042
1	A1	Genus	Cellvibrio	144	0.0118645
1	A1	Genus	Candidatus Amoebophilus	4047	0.333443
1	A1	Genus	Oxalobacter	1448	0.119304
1	A1	Genus	Staphylococcus	9	0.000741533
1	A1	Genus	Dechloromonas	232	0.0191151
1	A1	Genus	Azoarcus	299	0.0246354
1	A1	Genus	Alkalibacterium	620	0.0510834
1	A1	Genus	Skermanella	288	0.0237291
1	A1	Genus	Thiomonas	305	0.0251297
1	A1	Genus	Weissella	265	0.021834
1	A1	Genus	Anoxybacillus	138	0.0113702
1	A1	Genus	Saccharopolyspora	152	0.0125237
1	A1	Genus	Tetragenococcus	2443	0.201285
1	A1	Genus	Candidatus Endobugula	87	0.00716815
1	A1	Genus	Marinobacter	123	0.0101343
1	A1	Genus	Thiorhodococcus	260	0.0214221
1	A1	Genus	Burkholderia	439	0.0361703
1	A1	Genus	Geobacter	24	0.00197742
1	A1	Genus	Enterobacter	276	0.0227403
1	A1	Genus	Ehrlichia	89	0.00733294
1	A1	Genus	Lautropia	557	0.0458927
1	A1	Genus	Polynucleobacter	228	0.0187855
1	A1	Genus	Polaromonas	715	0.0589107
1	A1	Genus	Bacillus	1518	0.125072
1	A1	Genus	Desulfuromusa	25	0.00205981
1	A1	Genus	Litoricola	308	0.0253769
1	A1	Genus	Arenimonas	183	0.0150778
1	A1	Genus	Methylobacillus	406	0.0334514
1	A1	Genus	Stenotrophomonas	240	0.0197742
1	A1	Genus	Methylibium	405	0.033369
1	A1	Genus	Actinomyces	109	0.00898079
1	A1	Genus	Paucibacter	289	0.0238115
1	A1	Genus	Planococcus	48	0.00395484
1	A1	Genus	Zymomonas	1154	0.095081
1	A1	Genus	Natronincola	23	0.00189503
1	A1	Genus	Kushneria	161	0.0132652
1	A1	Genus	Methyloversatilis	91	0.00749772
1	A1	Genus	Luteolibacter	641	0.0528136
1	A1	Genus	Gallionella	141	0.0116174
1	A1	Genus	Pedobacter	248	0.0204333
1	A1	Genus	Azohydromonas	205	0.0168905
1	A1	Genus	Fructobacillus	381	0.0313916
1	A1	Genus	Nostoc	52	0.00428441
1	A1	Genus	Geobacillus	141	0.0116174
1	A1	Genus	Chromatium	224	0.0184559
1	A1	Genus	Stenoxybacter	48	0.00395484
1	A1	Genus	Prosthecobacter	751	0.0618768
1	A1	Genus	Sporolactobacillus	111	0.00914557
1	A1	Genus	Anaerospora	248	0.0204333
1	A1	Genus	Tepidimonas	97	0.00799208
1	A1	Genus	Rubrivivax	530	0.043668
1	A1	Genus	Pediococcus	512	0.042185
1	A1	Genus	Azomonas	94	0.0077449
1	A1	Genus	Calothrix	201	0.0165609
1	A1	Genus	Slackia	42	0.00346049
1	A1	Genus	Janthinobacterium	247	0.020351
1	A1	Genus	Thermicanus	50	0.00411963
1	A1	Genus	Bifidobacterium	600	0.0494355
1	A1	Genus	Porphyromonas	18	0.00148307
1	A1	Genus	Borrelia	16	0.00131828
1	A1	Genus	Pedosphaera	188	0.0154898
1	A1	Genus	Acinetobacter	21	0.00173024
1	A1	Genus	Candidatus Blochmannia	364	0.0299909
1	A1	Genus	Mycoplasma	674	0.0555326
1	A1	Genus	Maricaulis	13	0.0010711
1	A1	Genus	Tolumonas	467	0.0384773
1	A1	Genus	Marinitoga	93	0.00766251
1	A1	Genus	Labrys	266	0.0219164
1	A1	Genus	Hydrocarboniphaga	370	0.0304852
1	A1	Genus	Microbulbifer	95	0.00782729
1	A1	Genus	Desulfonauticus	15	0.00123589
1	A1	Genus	Acidiphilium	77	0.00634423
1	A1	Genus	Acidisoma	145	0.0119469
1	A1	Genus	Delftia	233	0.0191975
1	A1	Genus	Sporosarcina	141	0.0116174
1	A1	Genus	Pseudoalteromonas	56	0.00461398
1	A1	Genus	Acidisphaera	111	0.00914557
1	A1	Genus	Desulfotomaculum	72	0.00593226
1	A1	Genus	Sulfurospirillum	38	0.00313092
1	A1	Genus	Exiguobacterium	132	0.0108758
1	A1	Genus	Amaricoccus	60	0.00494355
1	A1	Genus	Thalassospira	49	0.00403724
1	A1	Genus	Marichromatium	30	0.00247178
1	A1	Genus	Arthrospira	318	0.0262008
1	A1	Genus	Legionella	205	0.0168905
1	A1	Genus	Fusobacterium	28	0.00230699
1	A1	Genus	Limnohabitans	54	0.0044492
1	A1	Genus	Candidatus Phytoplasma	127	0.0104639
1	A1	Genus	Haliangium	208	0.0171377
1	A1	Genus	Curtobacterium	16	0.00131828
1	A1	Genus	Plesiomonas	461	0.037983
1	A1	Genus	Dyadobacter	36	0.00296613
1	A1	Genus	Anaerolinea	30	0.00247178
1	A1	Genus	Devosia	136	0.0112054
1	A1	Genus	Thiocapsa	38	0.00313092
1	A1	Genus	Candidatus Methylacidiphilum	397	0.0327098
1	A1	Genus	Ancylobacter	11	0.000906318
1	A1	Genus	Brenneria	26	0.00214221
1	A1	Genus	Photobacterium	403	0.0332042
1	A1	Genus	Beijerinckia	21	0.00173024
1	A1	Genus	Uliginosibacterium	69	0.00568509
1	A1	Genus	Microvirus	140	0.011535
1	A1	Genus	Brevibacillus	54	0.0044492
1	A1	Genus	Pelomonas	170	0.0140067
1	A1	Genus	Marivita	20	0.00164785
1	A1	Genus	Singulisphaera	182	0.0149954
1	A1	Genus	Rickettsiella	29	0.00238938
1	A1	Genus	Bradyrhizobium	23	0.00189503
1	A1	Genus	Syntrophomonas	24	0.00197742
1	A1	Genus	Halomonas	156	0.0128532
1	A1	Genus	Variovorax	46	0.00379006
1	A1	Genus	Caloramator	75	0.00617944
1	A1	Genus	Rheinheimera	232	0.0191151
1	A1	Genus	Denitratisoma	135	0.011123
1	A1	Genus	Thermogemmatispora	46	0.00379006
1	A1	Genus	Marinospirillum	18	0.00148307
1	A1	Genus	Kineosporia	75	0.00617944
1	A1	Genus	Campylobacter	73	0.00601466
1	A1	Genus	Phaeobacter	70	0.00576748
1	A1	Genus	Alkalibacillus	403	0.0332042
1	A1	Genus	Agromyces	12	0.000988711
1	A1	Genus	Rhodanobacter	405	0.033369
1	A1	Genus	Pelotomaculum	17	0.00140067
1	A1	Genus	Marinococcus	148	0.0121941
1	A1	Genus	Leptothrix	172	0.0141715
1	A1	Genus	Acidocella	30	0.00247178
1	A1	Genus	Azospirillum	51	0.00420202
1	A1	Genus	Actinomadura	5	0.000411963
1	A1	Genus	Alishewanella	133	0.0109582
1	A1	Genus	Sedimentibacter	34	0.00280135
1	A1	Genus	Candidatus Glomeribacter	238	0.0196094
1	A1	Genus	Sterolibacterium	118	0.00972232
1	A1	Genus	Lentibacillus	14	0.0011535
1	A1	Genus	Propionibacterium	244	0.0201038
1	A1	Genus	Thioalkalivibrio	4	0.00032957
1	A1	Genus	Vibrio	17	0.00140067
1	A1	Genus	Kouleothrix	4	0.00032957
1	A1	Genus	Actinopolymorpha	22	0.00181264
1	A1	Genus	Erythromicrobium	37	0.00304852
1	A1	Genus	Yersinia	58	0.00477877
1	A1	Genus	Opitutus	108	0.00889839
1	A1	Genus	Desulfomonile	67	0.0055203
1	A1	Genus	Longilinea	7	0.000576748
1	A1	Genus	Coraliomargarita	16	0.00131828
1	A1	Genus	Marinomonas	46	0.00379006
1	A1	Genus	Isosphaera	79	0.00650901
1	A1	Genus	Viridibacillus	17	0.00140067
1	A1	Genus	Xanthomonas	24	0.00197742
1	A1	Genus	Bacteriovorax	239	0.0196918
1	A1	Genus	Propionigenium	117	0.00963993
1	A1	Genus	Arthrobacter	8	0.00065914
1	A1	Genus	Roseomonas	354	0.029167
1	A1	Genus	Emticicia	43	0.00354288
1	A1	Genus	Tenacibaculum	27	0.0022246
1	A1	Genus	Carboxydocella	10	0.000823926
1	A1	Genus	Gluconacetobacter	276	0.0227403
1	A1	Genus	Neisseria	9	0.000741533
1	A1	Genus	Pelagicoccus	42	0.00346049
1	A1	Genus	Chryseobacterium	152	0.0125237
1	A1	Genus	Helicobacter	66	0.00543791
1	A1	Genus	Providencia	79	0.00650901
1	A1	Genus	Cetobacterium	119	0.00980471
1	A1	Genus	Heliorestis	53	0.0043668
1	A1	Genus	Symbiobacterium	41	0.00337809
1	A1	Genus	Arsenophonus	8	0.00065914
1	A1	Genus	Roseospira	189	0.0155722
1	A1	Genus	Cohnella	363	0.0299085
1	A1	Genus	Desulfofrigus	18	0.00148307
1	A1	Genus	Sphingomonas	188	0.0154898
1	A1	Genus	Ralstonia	130	0.010711
1	A1	Genus	Pirellula	86	0.00708576
1	A1	Genus	Rhodospirillum	102	0.00840404
1	A1	Genus	Rickettsia	192	0.0158194
1	A1	Genus	Moraxella	38	0.00313092
1	A1	Genus	Deinococcus	12	0.000988711
1	A1	Genus	Lewinella	7	0.000576748
1	A1	Genus	Propionivibrio	11	0.000906318
1	A1	Genus	Clavibacter	51	0.00420202
1	A1	Genus	Leucobacter	2	0.000164785
1	A1	Genus	Virgibacillus	17	0.00140067
1	A1	Genus	Nitrincola	9	0.000741533
1	A1	Genus	Desulfovibrio	121	0.0099695
1	A1	Genus	Candidatus Scalindua	159	0.0131004
1	A1	Genus	Brevundimonas	38	0.00313092
1	A1	Genus	Pseudidiomarina	98	0.00807447
1	A1	Genus	Megasphaera	51	0.00420202
1	A1	Genus	Melissococcus	20	0.00164785
1	A1	Genus	Jeotgalicoccus	265	0.021834
1	A1	Genus	Chondromyces	143	0.0117821
1	A1	Genus	Candidatus Liberibacter	66	0.00543791
1	A1	Genus	Thermomonas	18	0.00148307
1	A1	Genus	Sporotomaculum	65	0.00535552
1	A1	Genus	Deferribacter	6	0.000494355
1	A1	Genus	Acidimicrobium	6	0.000494355
1	A1	Genus	Paracoccus	26	0.00214221
1	A1	Genus	Rubritalea	48	0.00395484
1	A1	Genus	Thiobacillus	113	0.00931036
1	A1	Genus	Nannocystis	20	0.00164785
1	A1	Genus	Thermoanaerobacter	4	0.00032957
1	A1	Genus	Oscillospira	42	0.00346049
1	A1	Genus	Planifilum	5	0.000411963
1	A1	Genus	Desulfosporosinus	61	0.00502595
1	A1	Genus	Propionispora	20	0.00164785
1	A1	Genus	Serratia	69	0.00568509
1	A1	Genus	Thermus	63	0.00519073
1	A1	Genus	Oenococcus	21	0.00173024
1	A1	Genus	Thermosipho	5	0.000411963
1	A1	Genus	Fervidobacterium	24	0.00197742
1	A1	Genus	Acholeplasma	14	0.0011535
1	A1	Genus	Thiohalorhabdus	15	0.00123589
1	A1	Genus	Microbacterium	66	0.00543791
1	A1	Genus	Leucothrix	43	0.00354288
1	A1	Genus	Limnobacter	45	0.00370767
1	A1	Genus	Halanaerobium	67	0.0055203
1	A1	Genus	Wolbachia	7	0.000576748
1	A1	Genus	Desulfonatronum	29	0.00238938
1	A1	Genus	Rhodoplanes	42	0.00346049
1	A1	Genus	Pelagibaca	6	0.000494355
1	A1	Genus	Psychromonas	8	0.00065914
1	A1	Genus	Hylemonella	57	0.00469638
1	A1	Genus	Amphritea	11	0.000906318
1	A1	Genus	Thermodesulfatator	26	0.00214221
1	A1	Genus	Sutterella	38	0.00313092
1	A1	Genus	Acetobacterium	15	0.00123589
1	A1	Genus	Erwinia	100	0.00823925
1	A1	Genus	Agrobacterium	75	0.00617944
1	A1	Genus	Lachnospira	7	0.000576748
1	A1	Genus	Gluconobacter	34	0.00280135
1	A1	Genus	Flammeovirga	7	0.000576748
1	A1	Genus	Rhizobium	5	0.000411963
1	A1	Genus	Ectothiorhodospira	42	0.00346049
1	A1	Genus	Luteimonas	33	0.00271895
1	A1	Genus	Klebsiella	11	0.000906318
1	A1	Genus	Lysobacter	13	0.0010711
1	A1	Genus	Alcanivorax	10	0.000823926
1	A1	Genus	Mycobacterium	11	0.000906318
1	A1	Genus	Edaphobacter	6	0.000494355
1	A1	Genus	Dickeya	6	0.000494355
1	A1	Genus	Laceyella	21	0.00173024
1	A1	Genus	Aquimonas	14	0.0011535
1	A1	Genus	Granulicella	3	0.000247178
1	A1	Genus	Herbaspirillum	20	0.00164785
1	A1	Genus	Trabulsiella	2	0.000164785
1	A1	Genus	Nesterenkonia	12	0.000988711
1	A1	Genus	Actinoallomurus	20	0.00164785
1	A1	Genus	Candidatus Rhabdochlamydia	14	0.0011535
1	A1	Genus	Luteibacter	31	0.00255417
1	A1	Genus	Peptoniphilus	32	0.00263656
1	A1	Genus	Methylobacterium	10	0.000823926
1	A1	Genus	Sediminibacillus	4	0.00032957
1	A1	Genus	Micromonospora	5	0.000411963
1	A1	Genus	Pullulanibacillus	14	0.0011535
1	A1	Genus	Thermodesulfovibrio	8	0.00065914
1	A1	Genus	Yaniella	3	0.000247178
1	A1	Genus	Jannaschia	1	8.23926e-05
1	A1	Genus	Loktanella	5	0.000411963
1	A1	Genus	Paenisporosarcina	5	0.000411963
1	A1	Genus	Euzebya	35	0.00288374
1	A1	Genus	Hyphomicrobium	8	0.00065914
1	A1	Genus	Anaerobranca	3	0.000247178
1	A1	Genus	Moritella	22	0.00181264
1	A1	Genus	Syntrophobacter	3	0.000247178
1	A1	Genus	Achromobacter	27	0.0022246
1	A1	Genus	Niastella	14	0.0011535
1	A1	Genus	Leptospira	15	0.00123589
1	A1	Genus	Waddlia	6	0.000494355
1	A1	Genus	Arcobacter	16	0.00131828
1	A1	Genus	Cellulomonas	1	8.23926e-05
1	A1	Genus	Caldicellulosiruptor	46	0.00379006
1	A1	Genus	Ruegeria	11	0.000906318
1	A1	Genus	Rhodococcus	13	0.0010711
1	A1	Genus	Dolichospermum	2	0.000164785
1	A1	Genus	Johnsonella	10	0.000823926
1	A1	Genus	Dokdonella	4	0.00032957
1	A1	Genus	Kutzneria	1	8.23926e-05
1	A1	Genus	Lysinibacillus	9	0.000741533
1	A1	Genus	Kribbella	6	0.000494355
1	A1	Genus	Desulfurispirillum	5	0.000411963
1	A1	Genus	Methylophaga	43	0.00354288
1	A1	Genus	Bellilinea	8	0.00065914
1	A1	Genus	Bacteroides	7	0.000576748
1	A1	Genus	Rhodocyclus	17	0.00140067
1	A1	Genus	Sebaldella	8	0.00065914
1	A1	Genus	Methylocella	4	0.00032957
1	A1	Genus	Negativicoccus	20	0.00164785
1	A1	Genus	Candidatus Regiella	8	0.00065914
1	A1	Genus	Peptococcus	10	0.000823926
1	A1	Genus	Aeromicrobium	20	0.00164785
1	A1	Genus	Kitasatospora	6	0.000494355
1	A1	Genus	Treponema	15	0.00123589
1	A1	Genus	Flavisolibacter	14	0.0011535
1	A1	Genus	Erysipelothrix	11	0.000906318
1	A1	Genus	Ferrimonas	1	8.23926e-05
1	A1	Genus	Caldilinea	7	0.000576748
1	A1	Genus	Brevibacterium	8	0.00065914
1	A1	Genus	Marinobacterium	15	0.00123589
1	A1	Genus	Nitrosococcus	6	0.000494355
1	A1	Genus	Polaribacter	4	0.00032957
1	A1	Genus	Xanthobacter	13	0.0010711
1	A1	Genus	Halorhodospira	4	0.00032957
1	A1	Genus	Sinorhizobium	1	8.23926e-05
1	A1	Genus	Rhodovibrio	6	0.000494355
1	A1	Genus	Nocardia	2	0.000164785
1	A1	Genus	Telmatospirillum	3	0.000247178
1	A1	Genus	Brachyspira	2	0.000164785
1	A1	Genus	Methylonatrum	2	0.000164785
1	A1	Genus	Sphingobacterium	6	0.000494355
1	A1	Genus	Afipia	5	0.000411963
1	A1	Genus	Desulfurispora	9	0.000741533
1	A1	Genus	Halochromatium	12	0.000988711
1	A1	Genus	Phenylobacterium	11	0.000906318
1	A1	Genus	Actinopolyspora	4	0.00032957
1	A1	Genus	Oceanisphaera	4	0.00032957
1	A1	Genus	Desulfosarcina	3	0.000247178
1	A1	Genus	Desulfobacter	12	0.000988711
1	A1	Genus	Mycetocola	3	0.000247178
1	A1	Genus	Veillonella	5	0.000411963
1	A1	Genus	Crenothrix	5	0.000411963
1	A1	Genus	Knoellia	5	0.000411963
1	A1	Genus	Rubellimicrobium	1	8.23926e-05
1	A1	Genus	Atopobium	2	0.000164785
1	A1	Genus	Amycolatopsis	4	0.00032957
1	A1	Genus	Oleomonas	7	0.000576748
1	A1	Genus	Glaciecola	11	0.000906318
1	A1	Genus	Agrococcus	2	0.000164785
1	A1	Genus	Thermoanaerobacterium	8	0.00065914
1	A1	Genus	Pigmentiphaga	4	0.00032957
1	A1	Genus	Azovibrio	1	8.23926e-05
1	A1	Genus	Moorella	1	8.23926e-05
1	A1	Genus	Dethiosulfovibrio	3	0.000247178
1	A1	Genus	Aminiphilus	2	0.000164785
1	A1	Genus	Ferrimicrobium	1	8.23926e-05
1	A1	Genus	Francisella	33	0.00271895
1	A1	Genus	Pedomicrobium	1	8.23926e-05
1	A1	Genus	Mitsuaria	5	0.000411963
1	A1	Genus	Terribacillus	1	8.23926e-05
1	A1	Genus	Methylotenera	2	0.000164785
1	A1	Genus	Methylosinus	3	0.000247178
1	A1	Genus	Actinokineospora	1	8.23926e-05
1	A1	Genus	Gillisia	3	0.000247178
1	A1	Genus	Streptosporangium	2	0.000164785
1	A1	Genus	Kosmotoga	1	8.23926e-05
1	A1	Genus	Halanaerobacter	1	8.23926e-05
1	A1	Genus	Muricauda	3	0.000247178
1	A1	Genus	Mesoplasma	9	0.000741533
1	A1	Genus	Gramella	6	0.000494355
1	A1	Genus	Hyphomonas	4	0.00032957
1	A1	Genus	Denitrobacter	1	8.23926e-05
1	A1	Genus	Faecalibacterium	3	0.000247178
1	A1	Genus	Pseudoxanthomonas	8	0.00065914
1	A1	Genus	Bdellovibrio	3	0.000247178
1	A1	Genus	Octadecabacter	3	0.000247178
1	A1	Genus	Blastochloris	1	8.23926e-05
1	A1	Genus	Trichodesmium	3	0.000247178
1	A1	Genus	Thiorhodospira	6	0.000494355
1	A1	Genus	Mogibacterium	3	0.000247178
1	A1	Genus	Thauera	2	0.000164785
1	A1	Genus	Pseudoclavibacter	3	0.000247178
1	A1	Genus	Candidatus Tammella	2	0.000164785
1	A1	Genus	Thioalkalimicrobium	3	0.000247178
1	A1	Genus	Puniceicoccus	1	8.23926e-05
1	A1	Genus	Aurantimonas	5	0.000411963
1	A1	Genus	Phyllobacterium	1	8.23926e-05
1	A1	Genus	Anaeromusa	1	8.23926e-05
1	A1	Genus	Actinocatenispora	3	0.000247178
1	A1	Genus	Granulicatella	2	0.000164785
1	A1	Genus	Arcanobacterium	3	0.000247178
1	A1	Genus	Ignatzschineria	1	8.23926e-05
1	A1	Genus	Petrotoga	3	0.000247178
1	A1	Genus	Sulfobacillus	2	0.000164785
1	A1	Genus	Selenomonas	3	0.000247178
1	A1	Genus	Ochrobactrum	6	0.000494355
1	A1	Genus	Thermobacillus	1	8.23926e-05
1	A1	Genus	Snowella	1	8.23926e-05
1	A1	Genus	Rummeliibacillus	1	8.23926e-05
1	A1	Genus	Reinekea	1	8.23926e-05
1	A1	Genus	Anaerofilum	1	8.23926e-05
1	A1	Genus	Microcystis	2	0.000164785
1	A1	Genus	Kaistobacter	1	8.23926e-05
1	A1	Genus	Holdemania	1	8.23926e-05
1	A1	Genus	Oceanospirillum	2	0.000164785
1	A1	Genus	Xenophilus	1	8.23926e-05
1	A1	Genus	Caldithrix	2	0.000164785
1	A1	Genus	Actinobaculum	1	8.23926e-05
1	A1	Genus	Corynebacterium	1	8.23926e-05
1	A1	Genus	Sulfuritalea	1	8.23926e-05
1	A1	Genus	Schlegelella	1	8.23926e-05
1	A1	Genus	Desulfonatronovibrio	1	8.23926e-05
1	A1	Genus	Tepidanaerobacter	1	8.23926e-05
1	A1	Genus	Pectinatus	7	0.000576748
1	A1	Genus	Desulfuromonas	2	0.000164785
1	A1	Genus	Olivibacter	1	8.23926e-05
1	A1	Genus	Caldanaerobacter	1	8.23926e-05
1	A1	Genus	Neorickettsia	2	0.000164785
1	A1	Genus	Candidatus Contubernalis	1	8.23926e-05
1	A1	Genus	Actinoplanes	1	8.23926e-05
1	A1	Genus	Zobellia	1	8.23926e-05
1	A1	Genus	Gemella	3	0.000247178
1	A1	Genus	Bartonella	3	0.000247178
1	A1	Genus	Salinivibrio	3	0.000247178
1	A1	Genus	Mesorhizobium	2	0.000164785
1	A1	Genus	Salinibacterium	1	8.23926e-05
1	A1	Genus	Thermobaculum	2	0.000164785
1	A1	Genus	Anaeroplasma	4	0.00032957
1	A1	Genus	Pasteurella	1	8.23926e-05
1	A1	Genus	Brachybacterium	1	8.23926e-05
1	A1	Genus	Haliscomenobacter	2	0.000164785
1	A1	Genus	Ureibacillus	1	8.23926e-05
1	A1	Genus	Kurthia	1	8.23926e-05
1	A1	Genus	Actinocorallia	1	8.23926e-05
1	A1	Genus	Sanguibacter	1	8.23926e-05
1	A1	Genus	Ammonifex	1	8.23926e-05
1	A1	Species	Unclassified	870494	71.7222
1	A1	Species	Leuconostoc gasicomitatum	4554	0.375216
1	A1	Species	Carnobacterium gallinarum	5608	0.462057
1	A1	Species	Carnobacterium maltaromaticum	75288	6.20317
1	A1	Species	Brochothrix thermosphacta	75793	6.24478
1	A1	Species	Carnobacterium funditum	856	0.070528
1	A1	Species	Carnobacterium inhibens	5742	0.473098
1	A1	Species	Pontibacillus halophilus	682	0.0561917
1	A1	Species	Leuconostoc gelidum	20930	1.72448
1	A1	Species	Lactobacillus brantae	48654	4.00873
1	A1	Species	Aquitalea denitrificans	3330	0.274367
1	A1	Species	Planomicrobium chinense	18	0.00148307
1	A1	Species	Lactobacillus manihotivorans	13165	1.0847
1	A1	Species	Rhodoferax antarcticus	11396	0.938945
1	A1	Species	Curvibacter gracilis	763	0.0628655
1	A1	Species	Lactobacillus equi	1829	0.150696
1	A1	Species	Segetibacter aerophilus	1303	0.107357
1	A1	Species	Lactobacillus gigeriorum	2918	0.240422
1	A1	Species	Lactobacillus japonicus	13178	1.08577
1	A1	Species	Hydrogenophaga defluvii	3423	0.28203
1	A1	Species	Flavobacterium glycines	60	0.00494355
1	A1	Species	Flavobacterium succinicans	365	0.0300733
1	A1	Species	Acidovorax wohlfahrtii	3465	0.28549
1	A1	Species	Cycloclasticus oligotrophus	2721	0.22419
1	A1	Species	Salinicoccus carnicancri	3	0.000247178
1	A1	Species	Erythrobacter aquimaris	62	0.00510834
1	A1	Species	Chthoniobacter flavus	53	0.0043668
1	A1	Species	Nocardioides islandensis	43	0.00354288
1	A1	Species	Vogesella perlucida	188	0.0154898
1	A1	Species	Lactococcus raffinolactis	2140	0.17632
1	A1	Species	Rhodobacter apigmentum	9	0.000741533
1	A1	Species	Vagococcus teuberi	704	0.0580044
1	A1	Species	Deefgea chitinilytica	419	0.0345225
1	A1	Species	Arthronema africanum	20	0.00164785
1	A1	Species	Deefgea rivuli	104	0.00856883
1	A1	Species	Rhodothermus clarus	48	0.00395484
1	A1	Species	Leuconostoc mesenteroides	5873	0.483891
1	A1	Species	Leuconostoc palmae	551	0.0453983
1	A1	Species	Myroides odoratus	117	0.00963993
1	A1	Species	Novosphingobium yangbajingensis	29	0.00238938
1	A1	Species	Paenibacillus pini	62	0.00510834
1	A1	Species	Anaerobacillus alkalilacustre	90	0.00741533
1	A1	Species	Alkaliphilus crotonatoxidans	106	0.00873361
1	A1	Species	Elizabethkingia meningoseptica	1116	0.0919501
1	A1	Species	Runella limosa	55	0.00453159
1	A1	Species	Chitinophaga soli	761	0.0627007
1	A1	Species	Pseudomonas brenneri	1061	0.0874185
1	A1	Species	Lactobacillus tucceti	160	0.0131828
1	A1	Species	Pseudomonas moraviensis	64	0.00527312
1	A1	Species	Comamonas kerstersii	114	0.00939275
1	A1	Species	Methylocaldum gracile	181	0.0149131
1	A1	Species	Streptococcus dentirousetti	258	0.0212573
1	A1	Species	Shewanella pneumatophori	135	0.011123
1	A1	Species	Comamonas nitrativorans	289	0.0238115
1	A1	Species	Lactobacillus oligofermentans	394	0.0324627
1	A1	Species	Lactobacillus intermedius	188	0.0154898
1	A1	Species	Candidatus Amoebophilus asiaticus	4047	0.333443
1	A1	Species	Oxalobacter vibrioformis	1447	0.119222
1	A1	Species	Leuconostoc carnosum	1666	0.137266
1	A1	Species	Lactobacillus letivazi	94	0.0077449
1	A1	Species	Skermanella aerolata	288	0.0237291
1	A1	Species	Thiomonas thermosulfata	202	0.0166433
1	A1	Species	Saccharopolyspora cebuensis	44	0.00362527
1	A1	Species	Tetragenococcus doogicus	2406	0.198237
1	A1	Species	Lactobacillus camelliae	340	0.0280135
1	A1	Species	Thiorhodococcus pfennigii	260	0.0214221
1	A1	Species	Geobacter toluenoxydans	14	0.0011535
1	A1	Species	Acidovorax temperans	51	0.00420202
1	A1	Species	Enterobacter hormaechei	157	0.0129356
1	A1	Species	Enterobacter amnigenus	81	0.0066738
1	A1	Species	Ehrlichia ovina	89	0.00733294
1	A1	Species	Lautropia mirabilis	352	0.0290022
1	A1	Species	Weissella minor	199	0.0163961
1	A1	Species	Arenimonas malthae	183	0.0150778
1	A1	Species	Methylobacillus glycogenes	398	0.0327922
1	A1	Species	Brochothrix campestris	566	0.0466342
1	A1	Species	Stenotrophomonas geniculata	50	0.00411963
1	A1	Species	Actinomyces naturae	109	0.00898079
1	A1	Species	Planococcus maritimus	31	0.00255417
1	A1	Species	Acidovorax anthurii	155	0.0127708
1	A1	Species	Methyloversatilis universalis	38	0.00313092
1	A1	Species	Leuconostoc inhae	36	0.00296613
1	A1	Species	Gallionella ferruginea	141	0.0116174
1	A1	Species	Carnobacterium divergens	369	0.0304028
1	A1	Species	Fructobacillus fructosus	88	0.00725054
1	A1	Species	Fructobacillus pseudoficulneus	256	0.0210925
1	A1	Species	Geobacillus kaue	3	0.000247178
1	A1	Species	Chromatium weissei	224	0.0184559
1	A1	Species	Listeria innocua	663	0.0546263
1	A1	Species	Prosthecobacter dejongeii	431	0.0355112
1	A1	Species	Marinobacter arcticus	101	0.00832165
1	A1	Species	Lactobacillus senmaizukei	403	0.0332042
1	A1	Species	Dechloromonas hortensis	173	0.0142539
1	A1	Species	Sporolactobacillus putidus	106	0.00873361
1	A1	Species	Anaerospora hongkongensis	247	0.020351
1	A1	Species	Tepidimonas arfidensis	8	0.00065914
1	A1	Species	Calothrix parietina	192	0.0158194
1	A1	Species	Janthinobacterium agaricidamnosum	59	0.00486116
1	A1	Species	Bifidobacterium bombi	502	0.0413611
1	A1	Species	Porphyromonas canis	18	0.00148307
1	A1	Species	Flavobacterium swingsii	298	0.024553
1	A1	Species	Vagococcus penaei	92	0.00758012
1	A1	Species	Psychrobacter glacialis	41	0.00337809
1	A1	Species	Candidatus Blochmannia rufipes	260	0.0214221
1	A1	Species	Mycoplasma insons	595	0.0490236
1	A1	Species	Maricaulis indicus	13	0.0010711
1	A1	Species	Candidatus Endobugula sertula	66	0.00543791
1	A1	Species	Pseudomonas corrugata	20	0.00164785
1	A1	Species	Tolumonas auensis	467	0.0384773
1	A1	Species	Marinitoga okinawensis	89	0.00733294
1	A1	Species	Pseudomonas azotoformans	54	0.0044492
1	A1	Species	Microbulbifer okinawensis	79	0.00650901
1	A1	Species	Desulfonauticus autotrophicus	15	0.00123589
1	A1	Species	Shewanella putrefaciens	45	0.00370767
1	A1	Species	Acidiphilium symbioticum	57	0.00469638
1	A1	Species	Acidisoma tundrae	67	0.0055203
1	A1	Species	Sporosarcina pasteurii	46	0.00379006
1	A1	Species	Enterobacter soli	24	0.00197742
1	A1	Species	Desulfotomaculum indicum	64	0.00527312
1	A1	Species	Exiguobacterium soli	29	0.00238938
1	A1	Species	Amaricoccus kaplicensis	41	0.00337809
1	A1	Species	Marichromatium gracile	30	0.00247178
1	A1	Species	Arthrospira fusiformis	206	0.0169729
1	A1	Species	Cellvibrio ostraviensis	17	0.00140067
1	A1	Species	Fusobacterium naviforme	26	0.00214221
1	A1	Species	Rhodoferax ferrireducens	330	0.0271895
1	A1	Species	Winogradskyella eximia	51	0.00420202
1	A1	Species	Curtobacterium flaccumfaciens	7	0.000576748
1	A1	Species	Pseudomonas collierea	63	0.00519073
1	A1	Species	Anaerolinea thermolimosa	30	0.00247178
1	A1	Species	Devosia insulae	9	0.000741533
1	A1	Species	Bacillus shandongensis	167	0.0137596
1	A1	Species	Luteolibacter algae	48	0.00395484
1	A1	Species	Anoxybacillus ayderensis	37	0.00304852
1	A1	Species	Photobacterium kishitanii	153	0.0126061
1	A1	Species	Beijerinckia derxii	21	0.00173024
1	A1	Species	Uliginosibacterium gangwonense	69	0.00568509
1	A1	Species	Paenibacillus contaminans	188	0.0154898
1	A1	Species	Enterococcus sulfureus	158	0.013018
1	A1	Species	Microvirus Enterobacteria phage PhiX174	140	0.011535
1	A1	Species	Lactobacillus siliginis	79	0.00650901
1	A1	Species	Brevibacillus ginsengisoli	54	0.0044492
1	A1	Species	Pelomonas saccharophila	162	0.0133476
1	A1	Species	Candidatus Blochmannia vafer	11	0.000906318
1	A1	Species	Syntrophomonas sapovorans	13	0.0010711
1	A1	Species	Variovorax boronicumulans	26	0.00214221
1	A1	Species	Rheinheimera soli	229	0.0188679
1	A1	Species	Denitratisoma oestradiolicum	101	0.00832165
1	A1	Species	Bacillus methanolicus	6	0.000494355
1	A1	Species	Rhodobacter gluconicum	72	0.00593226
1	A1	Species	Pseudomonas rhodesiae	74	0.00609705
1	A1	Species	Delftia lacustris	119	0.00980471
1	A1	Species	Kineosporia mikuniensis	74	0.00609705
1	A1	Species	Shewanella upenei	24	0.00197742
1	A1	Species	Streptococcus infantis	14	0.0011535
1	A1	Species	Sporosarcina contaminans	7	0.000576748
1	A1	Species	Alkalibacillus salilacus	126	0.0103815
1	A1	Species	Bacillus okhensis	153	0.0126061
1	A1	Species	Leuconostoc kimchii	114	0.00939275
1	A1	Species	Rhodanobacter thiooxydans	404	0.0332866
1	A1	Species	Pelotomaculum isophthalicicum	17	0.00140067
1	A1	Species	Photobacterium phosphoreum	196	0.0161489
1	A1	Species	Leptothrix discophora	146	0.0120293
1	A1	Species	Acidocella aminolytica	30	0.00247178
1	A1	Species	Azospirillum rugosum	38	0.00313092
1	A1	Species	Actinomadura latina	5	0.000411963
1	A1	Species	Alkalibacillus haloalkaliphilus	25	0.00205981
1	A1	Species	Hydrogenophaga palleronii	1	8.23926e-05
1	A1	Species	Burkholderia ubonensis	66	0.00543791
1	A1	Species	Legionella cherrii	12	0.000988711
1	A1	Species	Lactobacillus faeni	18	0.00148307
1	A1	Species	Sedimentibacter hydroxybenzoicus	34	0.00280135
1	A1	Species	Lentibacillus salinarum	7	0.000576748
1	A1	Species	Propionibacterium acnes	171	0.0140891
1	A1	Species	Streptomyces danangensis	30	0.00247178
1	A1	Species	Thioalkalivibrio jannaschii	4	0.00032957
1	A1	Species	Vibrio pommerensis	4	0.00032957
1	A1	Species	Planctomyces limnophilus	53	0.0043668
1	A1	Species	Erythromicrobium ramosum	35	0.00288374
1	A1	Species	Novosphingobium acidiphilum	88	0.00725054
1	A1	Species	Pediococcus cellicola	173	0.0142539
1	A1	Species	Enterococcus hawaiiensis	61	0.00502595
1	A1	Species	Lactococcus fujiensis	114	0.00939275
1	A1	Species	Desulfomonile tiedjei	67	0.0055203
1	A1	Species	Longilinea arvoryzae	7	0.000576748
1	A1	Species	Coraliomargarita akajimensis	16	0.00131828
1	A1	Species	Bacillus ginsenggisoli	7	0.000576748
1	A1	Species	Isosphaera pallida	79	0.00650901
1	A1	Species	Viridibacillus neidei	17	0.00140067
1	A1	Species	Rheinheimera texasensis	1	8.23926e-05
1	A1	Species	Bacteriovorax litoralis	148	0.0121941
1	A1	Species	Propionigenium modestum	117	0.00963993
1	A1	Species	Paenibacillus donghaensis	9	0.000741533
1	A1	Species	Arthrobacter soli	6	0.000494355
1	A1	Species	Chromobacterium subtsugae	16	0.00131828
1	A1	Species	Pediococcus argentinicus	159	0.0131004
1	A1	Species	Stenotrophomonas retroflexus	63	0.00519073
1	A1	Species	Roseomonas lacus	166	0.0136772
1	A1	Species	Emticicia ginsengisoli	19	0.00156546
1	A1	Species	Bacillus ferrariarum	17	0.00140067
1	A1	Species	Carboxydocella ferrireducens	10	0.000823926
1	A1	Species	Neisseria mucosa	9	0.000741533
1	A1	Species	Syntrophomonas bryantii	5	0.000411963
1	A1	Species	Novosphingobium hassiacum	1	8.23926e-05
1	A1	Species	Chryseobacterium caeni	2	0.000164785
1	A1	Species	Helicobacter suncus	50	0.00411963
1	A1	Species	Enterococcus italicus	1	8.23926e-05
1	A1	Species	Clostridium thermosuccinogenes	8	0.00065914
1	A1	Species	Clostridium proteolyticus	17	0.00140067
1	A1	Species	Geobacter pickeringii	1	8.23926e-05
1	A1	Species	Cetobacterium somerae	119	0.00980471
1	A1	Species	Symbiobacterium toebii	41	0.00337809
1	A1	Species	Cohnella thermotolerans	1	8.23926e-05
1	A1	Species	Desulfofrigus oceanense	18	0.00148307
1	A1	Species	Ralstonia insidiosa	101	0.00832165
1	A1	Species	Pirellula staleyi	70	0.00576748
1	A1	Species	Cellvibrio gandavensis	10	0.000823926
1	A1	Species	Flavobacterium micromati	26	0.00214221
1	A1	Species	Paenibacillus cellulositrophicus	2	0.000164785
1	A1	Species	Burkholderia seminalis	19	0.00156546
1	A1	Species	Burkholderia phenoliruptrix	11	0.000906318
1	A1	Species	Flavobacterium psychrophilum	33	0.00271895
1	A1	Species	Moraxella caviae	38	0.00313092
1	A1	Species	Clostridium alkalicellulosi	12	0.000988711
1	A1	Species	Tepidimonas ignava	6	0.000494355
1	A1	Species	Lewinella marina	3	0.000247178
1	A1	Species	Polaromonas vacuolata	19	0.00156546
1	A1	Species	Propionivibrio dicarboxylicus	9	0.000741533
1	A1	Species	Methylocaldum tepidum	13	0.0010711
1	A1	Species	Propionibacterium avidum	20	0.00164785
1	A1	Species	Chromobacterium haemolyticum	43	0.00354288
1	A1	Species	Streptococcus pseudopneumoniae	20	0.00164785
1	A1	Species	Stenotrophomonas pavanii	23	0.00189503
1	A1	Species	Cohnella soli	149	0.0122765
1	A1	Species	Devosia ginsengisoli	11	0.000906318
1	A1	Species	Clavibacter michiganensis	51	0.00420202
1	A1	Species	Leucobacter chromiiresistens	1	8.23926e-05
1	A1	Species	Agromyces fucosus	1	8.23926e-05
1	A1	Species	Pelomonas puraquae	7	0.000576748
1	A1	Species	Saccharopolyspora shandongensis	15	0.00123589
1	A1	Species	Legionella shakespearei	23	0.00189503
1	A1	Species	Hydrogenophaga pseudoflava	15	0.00123589
1	A1	Species	Nitrincola lacisaponensis	9	0.000741533
1	A1	Species	Limnohabitans parvus	1	8.23926e-05
1	A1	Species	Burkholderia lata	1	8.23926e-05
1	A1	Species	Desulfovibrio psychrotolerans	19	0.00156546
1	A1	Species	Tetragenococcus muriaticus	29	0.00238938
1	A1	Species	Sphingobium abikonense	19	0.00156546
1	A1	Species	Burkholderia brasilensis	150	0.0123589
1	A1	Species	Flavobacterium reichenbachii	9	0.000741533
1	A1	Species	Candidatus Scalindua brodae	159	0.0131004
1	A1	Species	Lactobacillus parakefiri	60	0.00494355
1	A1	Species	Rickettsia monacensis	35	0.00288374
1	A1	Species	Delftia tsuruhatensis	102	0.00840404
1	A1	Species	Myroides injenensis	6	0.000494355
1	A1	Species	Brevundimonas staleyi	31	0.00255417
1	A1	Species	Megasphaera hominis	51	0.00420202
1	A1	Species	Jeotgalicoccus coquinae	257	0.0211749
1	A1	Species	Propionibacterium microaerophilum	21	0.00173024
1	A1	Species	Desulfuromusa succinoxidans	4	0.00032957
1	A1	Species	Fructobacillus tropaeoli	13	0.0010711
1	A1	Species	Chondromyces pediculatus	143	0.0117821
1	A1	Species	Desulfotomaculum thermoacetoxidans	2	0.000164785
1	A1	Species	Sporotomaculum syntrophicum	65	0.00535552
1	A1	Species	Paenibacillus darangshiensis	32	0.00263656
1	A1	Species	Yersinia frederiksenii	19	0.00156546
1	A1	Species	Lactobacillus apis	200	0.0164785
1	A1	Species	Bacteriovorax marinus	89	0.00733294
1	A1	Species	Brevundimonas bullata	1	8.23926e-05
1	A1	Species	Deferribacter autotrophicus	6	0.000494355
1	A1	Species	Salinicoccus luteus	16	0.00131828
1	A1	Species	Tepidimonas thermarum	11	0.000906318
1	A1	Species	Paracoccus sulfuroxidans	22	0.00181264
1	A1	Species	Streptococcus orisratti	9	0.000741533
1	A1	Species	Stenotrophomonas chelatiphaga	21	0.00173024
1	A1	Species	Nannocystis pusilla	14	0.0011535
1	A1	Species	Planifilum fimeticola	5	0.000411963
1	A1	Species	Lactobacillus thailandensis	31	0.00255417
1	A1	Species	Roseospira visakhapatnamensis	40	0.0032957
1	A1	Species	Propionispora hippei	20	0.00164785
1	A1	Species	Macrococcus bovicus	11	0.000906318
1	A1	Species	Streptococcus tigurinus	12	0.000988711
1	A1	Species	Serratia entomophila	59	0.00486116
1	A1	Species	Oscillospira eae	8	0.00065914
1	A1	Species	Devosia hwasunensis	1	8.23926e-05
1	A1	Species	Chryseobacterium indologenes	57	0.00469638
1	A1	Species	Leuconostoc argentinum	14	0.0011535
1	A1	Species	Bacillus isabeliae	30	0.00247178
1	A1	Species	Thermosipho ferriphilus	5	0.000411963
1	A1	Species	Thiomonas perometabolis	44	0.00362527
1	A1	Species	Lactobacillus nodensis	10	0.000823926
1	A1	Species	Halomonas neptunia	66	0.00543791
1	A1	Species	Thiohalorhabdus denitrificans	15	0.00123589
1	A1	Species	Leucothrix mucor	43	0.00354288
1	A1	Species	Limnobacter litoralis	45	0.00370767
1	A1	Species	Azohydromonas australica	30	0.00247178
1	A1	Species	Desulfosporosinus hippei	29	0.00238938
1	A1	Species	Comamonas koreensis	1	8.23926e-05
1	A1	Species	Bacillus horneckiae	42	0.00346049
1	A1	Species	Wolbachia pipientis	3	0.000247178
1	A1	Species	Rhodobacter ovatus	64	0.00527312
1	A1	Species	Desulfonatronum thiosulfatophilum	29	0.00238938
1	A1	Species	Streptococcus halichoeri	10	0.000823926
1	A1	Species	Kushneria indalinina	51	0.00420202
1	A1	Species	Clostridium taeniosporum	2	0.000164785
1	A1	Species	Psychromonas aquimarina	5	0.000411963
1	A1	Species	Amphritea atlantica	11	0.000906318
1	A1	Species	Fructobacillus ficulneus	5	0.000411963
1	A1	Species	Virgibacillus salexigens	3	0.000247178
1	A1	Species	Thermogemmatispora onikobensis	3	0.000247178
1	A1	Species	Pseudomonas marginalis	24	0.00197742
1	A1	Species	Sphingomonas fennica	9	0.000741533
1	A1	Species	Thermodesulfatator atlanticus	26	0.00214221
1	A1	Species	Syntrophomonas cellicola	6	0.000494355
1	A1	Species	Sutterella sanguinus	38	0.00313092
1	A1	Species	Bacillus deserti	2	0.000164785
1	A1	Species	Comamonas composti	9	0.000741533
1	A1	Species	Lachnospira pectinoschiza	7	0.000576748
1	A1	Species	Gluconobacter krungthepensis	7	0.000576748
1	A1	Species	Acidiphilium organovorum	4	0.00032957
1	A1	Species	Lactobacillus similis	12	0.000988711
1	A1	Species	Flammeovirga pacifica	7	0.000576748
1	A1	Species	Rhizobium alamii	5	0.000411963
1	A1	Species	Lactobacillus homohiochii	1	8.23926e-05
1	A1	Species	Photobacterium lutimaris	12	0.000988711
1	A1	Species	Ectothiorhodospira haloalkaliphila	40	0.0032957
1	A1	Species	Vibrio porteresiae	6	0.000494355
1	A1	Species	Desulfovibrio carbinolicus	7	0.000576748
1	A1	Species	Desulfotomaculum putei	3	0.000247178
1	A1	Species	Luteimonas lutimaris	2	0.000164785
1	A1	Species	Halomonas sinaiensis	2	0.000164785
1	A1	Species	Erwinia billingiae	88	0.00725054
1	A1	Species	Klebsiella granulomatis	11	0.000906318
1	A1	Species	Alcanivorax indicus	10	0.000823926
1	A1	Species	Sphingomonas oligophenolica	6	0.000494355
1	A1	Species	Candidatus Blochmannia castaneus	14	0.0011535
1	A1	Species	Mycoplasma timone	32	0.00263656
1	A1	Species	Mycobacterium simulans	10	0.000823926
1	A1	Species	Edaphobacter modestus	6	0.000494355
1	A1	Species	Dickeya dianthicola	4	0.00032957
1	A1	Species	Pseudomonas benzenivorans	4	0.00032957
1	A1	Species	Desulfosporosinus lacus	5	0.000411963
1	A1	Species	Streptococcus ursoris	6	0.000494355
1	A1	Species	Laceyella putida	21	0.00173024
1	A1	Species	Aquimonas voraii	14	0.0011535
1	A1	Species	Granulicella tundricola	3	0.000247178
1	A1	Species	Lentibacillus kapialis	3	0.000247178
1	A1	Species	Herbaspirillum rubrisubalbicans	2	0.000164785
1	A1	Species	Gluconobacter morbifer	17	0.00140067
1	A1	Species	Trabulsiella odontotermitis	2	0.000164785
1	A1	Species	Virgibacillus byunsanensis	3	0.000247178
1	A1	Species	Lactobacillus parabrevis	1	8.23926e-05
1	A1	Species	Hydrocarboniphaga daqingensis	9	0.000741533
1	A1	Species	Roseococcus thiosulfatophilus	3	0.000247178
1	A1	Species	Stenotrophomonas koreensis	6	0.000494355
1	A1	Species	Actinoallomurus luridus	20	0.00164785
1	A1	Species	Candidatus Rhabdochlamydia crassificans	14	0.0011535
1	A1	Species	Luteibacter anthropi	28	0.00230699
1	A1	Species	Peptoniphilus coxii	11	0.000906318
1	A1	Species	Sphingomonas hunanensis	38	0.00313092
1	A1	Species	Chryseobacterium isbiliense	4	0.00032957
1	A1	Species	Thiobacillus thiophilus	26	0.00214221
1	A1	Species	Deinococcus soli	1	8.23926e-05
1	A1	Species	Sediminibacillus halophilus	4	0.00032957
1	A1	Species	Burkholderia andropogonis	1	8.23926e-05
1	A1	Species	Acinetobacter antiviralis	2	0.000164785
1	A1	Species	Halanaerobium alcaliphilum	18	0.00148307
1	A1	Species	Weissella salipiscis	23	0.00189503
1	A1	Species	Chryseobacterium hagamense	2	0.000164785
1	A1	Species	Pullulanibacillus mentitum	8	0.00065914
1	A1	Species	Chryseobacterium soldanellicola	1	8.23926e-05
1	A1	Species	Erwinia rhapontici	3	0.000247178
1	A1	Species	Thermodesulfovibrio thiophilus	3	0.000247178
1	A1	Species	Geobacillus thermoglucosidans	40	0.0032957
1	A1	Species	Loktanella atrilutea	2	0.000164785
1	A1	Species	Paenisporosarcina quisquiliarum	5	0.000411963
1	A1	Species	Roseococcus suduntuyensis	5	0.000411963
1	A1	Species	Alkalibacterium subtropicum	37	0.00304852
1	A1	Species	Pullulanibacillus naganoensis	5	0.000411963
1	A1	Species	Yersinia kristensenii	2	0.000164785
1	A1	Species	Caloramator mitchellensis	51	0.00420202
1	A1	Species	Euzebya tangerina	35	0.00288374
1	A1	Species	Gemmata obscuriglobus	8	0.00065914
1	A1	Species	Clostridium caenicola	16	0.00131828
1	A1	Species	Propionivibrio limicola	2	0.000164785
1	A1	Species	Flavobacterium terrigena	16	0.00131828
1	A1	Species	Anaerobranca zavarzinii	3	0.000247178
1	A1	Species	Sphingobium faniae	2	0.000164785
1	A1	Species	Yersinia massiliensis	10	0.000823926
1	A1	Species	Moritella japonica	20	0.00164785
1	A1	Species	Trichococcus pasteurii	5	0.000411963
1	A1	Species	Leuconostoc pseudomesenteroides	14	0.0011535
1	A1	Species	Syntrophobacter wolinii	3	0.000247178
1	A1	Species	Achromobacter arsenitoxydans	20	0.00164785
1	A1	Species	Macrococcus equipercicus	6	0.000494355
1	A1	Species	Niastella koreensis	12	0.000988711
1	A1	Species	Leptospira licerasiae	15	0.00123589
1	A1	Species	Ralstonia detusculanense	27	0.0022246
1	A1	Species	Flavobacterium chungangense	6	0.000494355
1	A1	Species	Arcobacter defluvii	8	0.00065914
1	A1	Species	Arcobacter skirrowii	4	0.00032957
1	A1	Species	Ruegeria lacuscaerulensis	11	0.000906318
1	A1	Species	Salinicoccus iranensis	2	0.000164785
1	A1	Species	Geobacillus gargensis	1	8.23926e-05
1	A1	Species	Variovorax dokdonensis	19	0.00156546
1	A1	Species	Rhodococcus percolatus	7	0.000576748
1	A1	Species	Campylobacter faecalis	1	8.23926e-05
1	A1	Species	Johnsonella ignava	10	0.000823926
1	A1	Species	Paenibacillus gansuensis	40	0.0032957
1	A1	Species	Dokdonella fugitiva	4	0.00032957
1	A1	Species	Rubrivivax benzoatilyticus	7	0.000576748
1	A1	Species	Candidatus Blochmannia herculeanus	25	0.00205981
1	A1	Species	Rhodococcus imtechensis	6	0.000494355
1	A1	Species	Lysinibacillus parviboronicapiens	9	0.000741533
1	A1	Species	Desulfurispirillum alkaliphilum	5	0.000411963
1	A1	Species	Bellilinea caldifistulae	8	0.00065914
1	A1	Species	Rhodocyclus purpureus	17	0.00140067
1	A1	Species	Enterococcus camelliae	33	0.00271895
1	A1	Species	Sphingobium ummariense	4	0.00032957
1	A1	Species	Staphylococcus massiliensis	1	8.23926e-05
1	A1	Species	Clostridium sulfidigenes	4	0.00032957
1	A1	Species	Agrobacterium albertimagni	11	0.000906318
1	A1	Species	Negativicoccus succinicivorans	20	0.00164785
1	A1	Species	Peptococcus niger	10	0.000823926
1	A1	Species	Aeromicrobium ponti	20	0.00164785
1	A1	Species	Kitasatospora melanogena	5	0.000411963
1	A1	Species	Pseudomonas metavorans	1	8.23926e-05
1	A1	Species	Planomicrobium flavidum	2	0.000164785
1	A1	Species	Streptococcus castoreus	1	8.23926e-05
1	A1	Species	Roseomonas massiliensis	3	0.000247178
1	A1	Species	Treponema porcinum	2	0.000164785
1	A1	Species	Candidatus Liberibacter africanus	2	0.000164785
1	A1	Species	Asticcacaulis benevestitus	7	0.000576748
1	A1	Species	Flavisolibacter ginsengisoli	14	0.0011535
1	A1	Species	Exiguobacterium antarcticum	14	0.0011535
1	A1	Species	Erysipelothrix muris	11	0.000906318
1	A1	Species	Clostridium thermoalcaliphilum	20	0.00164785
1	A1	Species	Kribbella ginsengisoli	5	0.000411963
1	A1	Species	Sphingobium amiense	22	0.00181264
1	A1	Species	Flavobacterium branchiophilum	8	0.00065914
1	A1	Species	Caldilinea tarbellica	7	0.000576748
1	A1	Species	Marinomonas basaltis	3	0.000247178
1	A1	Species	Brevibacterium samyangense	1	8.23926e-05
1	A1	Species	Halanaerobium fermentans	6	0.000494355
1	A1	Species	Marinobacterium sediminicola	15	0.00123589
1	A1	Species	Nitrosococcus watsoni	6	0.000494355
1	A1	Species	Polaribacter butkevichii	4	0.00032957
1	A1	Species	Peptoniphilus methioninivorax	10	0.000823926
1	A1	Species	Azohydromonas lata	7	0.000576748
1	A1	Species	Asticcacaulis biprosthecium	33	0.00271895
1	A1	Species	Xanthobacter polyaromaticivorans	13	0.0010711
1	A1	Species	Halorhodospira halochloris	4	0.00032957
1	A1	Species	Rhodovibrio sodomensis	6	0.000494355
1	A1	Species	Loktanella agnita	3	0.000247178
1	A1	Species	Thermoanaerobacter kivui	2	0.000164785
1	A1	Species	Telmatospirillum siberiense	3	0.000247178
1	A1	Species	Methylophaga thiooxydans	9	0.000741533
1	A1	Species	Pelagicoccus croceus	17	0.00140067
1	A1	Species	Agromyces salentinus	2	0.000164785
1	A1	Species	Litoricola marina	8	0.00065914
1	A1	Species	Mycoplasma lipophilum	6	0.000494355
1	A1	Species	Desulfovibrio butyratiphilus	14	0.0011535
1	A1	Species	Brachyspira ibaraki	2	0.000164785
1	A1	Species	Clostridium tepidiprofundi	2	0.000164785
1	A1	Species	Bacillus bogoriensis	8	0.00065914
1	A1	Species	Thermogemmatispora foliorum	5	0.000411963
1	A1	Species	Methylonatrum kenyense	2	0.000164785
1	A1	Species	Pseudomonas migulae	7	0.000576748
1	A1	Species	Sphingobacterium shayense	5	0.000411963
1	A1	Species	Pseudomonas cedrina	2	0.000164785
1	A1	Species	Amaricoccus macauensis	8	0.00065914
1	A1	Species	Erwinia papayae	2	0.000164785
1	A1	Species	Bacillus subterraneus	2	0.000164785
1	A1	Species	Sphingomonas sanxanigenens	3	0.000247178
1	A1	Species	Paenibacillus panacisoli	3	0.000247178
1	A1	Species	Halomonas sabkhae	13	0.0010711
1	A1	Species	Photobacterium aquimaris	23	0.00189503
1	A1	Species	Desulfovibrio salexigens	2	0.000164785
1	A1	Species	Pediococcus stilesii	7	0.000576748
1	A1	Species	Salinicoccus salsiraiae	5	0.000411963
1	A1	Species	Pseudomonas teessidea	10	0.000823926
1	A1	Species	Pseudomonas parafulva	8	0.00065914
1	A1	Species	Luteimonas terricola	7	0.000576748
1	A1	Species	Hyphomicrobium aestuarii	5	0.000411963
1	A1	Species	Caloramator uzoniensis	15	0.00123589
1	A1	Species	Desulfurispora thermophila	9	0.000741533
1	A1	Species	Halochromatium salexigens	12	0.000988711
1	A1	Species	Acidovorax facilis	14	0.0011535
1	A1	Species	Hydrogenophaga taeniospiralis	33	0.00271895
1	A1	Species	Desulfovibrio aceae	3	0.000247178
1	A1	Species	Actinopolymorpha rutila	1	8.23926e-05
1	A1	Species	Enterobacter nickellidurans	1	8.23926e-05
1	A1	Species	Comamonas odontotermitis	17	0.00140067
1	A1	Species	Giesbergeria sinuosa	1	8.23926e-05
1	A1	Species	Yersinia ruckeri	5	0.000411963
1	A1	Species	Oceanisphaera laurenciae	4	0.00032957
1	A1	Species	Luteimonas aquatica	23	0.00189503
1	A1	Species	Mycetocola lacteus	3	0.000247178
1	A1	Species	Veillonella montpellierensis	5	0.000411963
1	A1	Species	Giesbergeria voronezhensis	11	0.000906318
1	A1	Species	Thermomonas dokdonensis	2	0.000164785
1	A1	Species	Devosia limi	2	0.000164785
1	A1	Species	Crenothrix polyspora	5	0.000411963
1	A1	Species	Brevundimonas terrae	2	0.000164785
1	A1	Species	Pseudomonas coronafaciens	2	0.000164785
1	A1	Species	Weissella hanii	3	0.000247178
1	A1	Species	Shewanella profunda	10	0.000823926
1	A1	Species	Pseudomonas tremae	6	0.000494355
1	A1	Species	Thiobacillus sajanensis	2	0.000164785
1	A1	Species	Knoellia aerolata	5	0.000411963
1	A1	Species	Rubellimicrobium aerolatum	1	8.23926e-05
1	A1	Species	Micromonospora brunnescens	1	8.23926e-05
1	A1	Species	Agrobacterium viscosum	3	0.000247178
1	A1	Species	Enterococcus rottae	14	0.0011535
1	A1	Species	Rhodobacter blasticus	11	0.000906318
1	A1	Species	Polynucleobacter rarus	6	0.000494355
1	A1	Species	Psychromonas ossibalaenae	2	0.000164785
1	A1	Species	Candidatus Endobugula glebosa	2	0.000164785
1	A1	Species	Atopobium fossor	2	0.000164785
1	A1	Species	Legionella rowbothamii	1	8.23926e-05
1	A1	Species	Amycolatopsis pigmentata	4	0.00032957
1	A1	Species	Pseudomonas clemancea	5	0.000411963
1	A1	Species	Rickettsia limoniae	4	0.00032957
1	A1	Species	Mycoplasma iguanae	8	0.00065914
1	A1	Species	Sphingobium rhizovicinum	5	0.000411963
1	A1	Species	Pseudomonas abietaniphila	1	8.23926e-05
1	A1	Species	Agromyces succinolyticus	6	0.000494355
1	A1	Species	Photobacterium lipolyticum	3	0.000247178
1	A1	Species	Oleomonas sagaranensis	7	0.000576748
1	A1	Species	Chromobacterium piscinae	20	0.00164785
1	A1	Species	Glaciecola nitratireducens	11	0.000906318
1	A1	Species	Agrococcus versicolor	2	0.000164785
1	A1	Species	Pedobacter africanus	4	0.00032957
1	A1	Species	Thermoanaerobacterium islandicum	8	0.00065914
1	A1	Species	Planomicrobium stackebrandtii	1	8.23926e-05
1	A1	Species	Treponema succinifaciens	11	0.000906318
1	A1	Species	Pelagicoccus albus	2	0.000164785
1	A1	Species	Roseospira thiosulfatophila	7	0.000576748
1	A1	Species	Yersinia nurmii	10	0.000823926
1	A1	Species	Jeotgalicoccus nanhaiensis	1	8.23926e-05
1	A1	Species	Propionibacterium propionicum	2	0.000164785
1	A1	Species	Achromobacter ruhlandii	4	0.00032957
1	A1	Species	Curtobacterium pusillum	7	0.000576748
1	A1	Species	Pontibacillus marinus	11	0.000906318
1	A1	Species	Lysobacter deserti	4	0.00032957
1	A1	Species	Bacillus butanolivorans	1	8.23926e-05
1	A1	Species	Rickettsia marmionii	1	8.23926e-05
1	A1	Species	Emticicia oligotrophica	6	0.000494355
1	A1	Species	Planococcus columbae	1	8.23926e-05
1	A1	Species	Bacillus pocheonensis	10	0.000823926
1	A1	Species	Serratia ureilytica	5	0.000411963
1	A1	Species	Aminiphilus circumscriptus	2	0.000164785
1	A1	Species	Melissococcus plutonius	2	0.000164785
1	A1	Species	Desulfovibrio longreachensis	2	0.000164785
1	A1	Species	Ferrimicrobium acidiphilum	1	8.23926e-05
1	A1	Species	Photobacterium jeanii	3	0.000247178
1	A1	Species	Bacillus mucilaginosus	2	0.000164785
1	A1	Species	Desulfovibrio litoralis	2	0.000164785
1	A1	Species	Francisella hispaniensis	33	0.00271895
1	A1	Species	Pseudomonas gessardii	4	0.00032957
1	A1	Species	Thiocapsa pendens	1	8.23926e-05
1	A1	Species	Staphylococcus pseudolugdunensis	1	8.23926e-05
1	A1	Species	Mitsuaria chitosanitabida	5	0.000411963
1	A1	Species	Herbaspirillum magnetovibrio	13	0.0010711
1	A1	Species	Clostridium cavendishii	2	0.000164785
1	A1	Species	Enterococcus silesiacus	3	0.000247178
1	A1	Species	Paenibacillus ginsengagri	4	0.00032957
1	A1	Species	Streptomyces lazureus	2	0.000164785
1	A1	Species	Fusobacterium gonidiaformans	1	8.23926e-05
1	A1	Species	Carnobacterium viridans	8	0.00065914
1	A1	Species	Methylotenera versatilis	1	8.23926e-05
1	A1	Species	Bacillus herbersteinensis	2	0.000164785
1	A1	Species	Streptococcus fryi	2	0.000164785
1	A1	Species	Devosia yakushimensis	6	0.000494355
1	A1	Species	Pseudomonas caricapapayae	3	0.000247178
1	A1	Species	Bacillus alcaliinulinus	1	8.23926e-05
1	A1	Species	Luteibacter yeojuensis	2	0.000164785
1	A1	Species	Chryseobacterium greenlandense	4	0.00032957
1	A1	Species	Actinokineospora inagensis	1	8.23926e-05
1	A1	Species	Gillisia sandarakina	2	0.000164785
1	A1	Species	Streptococcus marimammalium	2	0.000164785
1	A1	Species	Lactobacillus hayakitensis	10	0.000823926
1	A1	Species	Kosmotoga arenicorallina	1	8.23926e-05
1	A1	Species	Pontibacillus chungwhensis	1	8.23926e-05
1	A1	Species	Litoricola lipolytica	1	8.23926e-05
1	A1	Species	Halanaerobacter chitinivorans	1	8.23926e-05
1	A1	Species	Lactobacillus guizhouensis	7	0.000576748
1	A1	Species	Bifidobacterium indicum	2	0.000164785
1	A1	Species	Muricauda lutimaris	3	0.000247178
1	A1	Species	Bacillus olivae	9	0.000741533
1	A1	Species	Mesoplasma entomophilum	9	0.000741533
1	A1	Species	Winogradskyella exilis	1	8.23926e-05
1	A1	Species	Treponema calligyrum	1	8.23926e-05
1	A1	Species	Glycomyces tenuis	1	8.23926e-05
1	A1	Species	Cohnella damuensis	11	0.000906318
1	A1	Species	Denitrobacter permanens	1	8.23926e-05
1	A1	Species	Herbaspirillum aquaticum	3	0.000247178
1	A1	Species	Clostridium bovipellis	1	8.23926e-05
1	A1	Species	Pseudoxanthomonas sacheonensis	8	0.00065914
1	A1	Species	Flavobacterium denitrificans	1	8.23926e-05
1	A1	Species	Cohnella hongkongensis	1	8.23926e-05
1	A1	Species	Bdellovibrio exovorus	3	0.000247178
1	A1	Species	Sporolactobacillus laevus	5	0.000411963
1	A1	Species	Cellvibrio fulvus	3	0.000247178
1	A1	Species	Novosphingobium lentum	1	8.23926e-05
1	A1	Species	Octadecabacter arcticus	3	0.000247178
1	A1	Species	Blastochloris gulmargensis	1	8.23926e-05
1	A1	Species	Trichodesmium tenue	2	0.000164785
1	A1	Species	Tetragenococcus koreensis	2	0.000164785
1	A1	Species	Lewinella lutea	4	0.00032957
1	A1	Species	Rubrivivax gelatinosus	3	0.000247178
1	A1	Species	Kushneria aurantia	3	0.000247178
1	A1	Species	Planctomyces maris	2	0.000164785
1	A1	Species	Bacillus alkalogaya	1	8.23926e-05
1	A1	Species	Marinomonas foliarum	2	0.000164785
1	A1	Species	Prosthecobacter fusiformis	1	8.23926e-05
1	A1	Species	Enterococcus asini	2	0.000164785
1	A1	Species	Candidatus Tammella caduceiae	2	0.000164785
1	A1	Species	Clostridium termitidis	1	8.23926e-05
1	A1	Species	Pseudomonas borealis	3	0.000247178
1	A1	Species	Curvibacter lanceolatus	7	0.000576748
1	A1	Species	Enterobacter gergoviae	1	8.23926e-05
1	A1	Species	Pelagicoccus mobilis	1	8.23926e-05
1	A1	Species	Devosia terrae	3	0.000247178
1	A1	Species	Paenibacillus taiwanensis	3	0.000247178
1	A1	Species	Thioalkalimicrobium sibiricum	3	0.000247178
1	A1	Species	Puniceicoccus vermicola	1	8.23926e-05
1	A1	Species	Aurantimonas litoralis	5	0.000411963
1	A1	Species	Streptococcus plurextorum	1	8.23926e-05
1	A1	Species	Burkholderia sartisoli	2	0.000164785
1	A1	Species	Dickeya paradisiaca	1	8.23926e-05
1	A1	Species	Novosphingobium indicum	2	0.000164785
1	A1	Species	Phyllobacterium catacumbae	1	8.23926e-05
1	A1	Species	Bacteroides denticanum	1	8.23926e-05
1	A1	Species	Enterococcus lactis	2	0.000164785
1	A1	Species	Flavobacterium antarcticum	1	8.23926e-05
1	A1	Species	Streptococcus oralis	2	0.000164785
1	A1	Species	Desulfovibrio caledoniensis	1	8.23926e-05
1	A1	Species	Anaeromusa acidaminophila	1	8.23926e-05
1	A1	Species	Dechloromonas aromatica	1	8.23926e-05
1	A1	Species	Thalassospira tepidiphila	1	8.23926e-05
1	A1	Species	Micromonospora rifamycinica	3	0.000247178
1	A1	Species	Methylotenera mobilis	1	8.23926e-05
1	A1	Species	Granulicatella adiacens	2	0.000164785
1	A1	Species	Roseomonas terpenica	2	0.000164785
1	A1	Species	Arcanobacterium bernardiae	3	0.000247178
1	A1	Species	Halomonas halocynthiae	1	8.23926e-05
1	A1	Species	Ignatzschineria ureiclastica	1	8.23926e-05
1	A1	Species	Sulfobacillus yellowstonensis	2	0.000164785
1	A1	Species	Rhodoplanes cryptolactis	3	0.000247178
1	A1	Species	Sphingobacterium bambusae	1	8.23926e-05
1	A1	Species	Selenomonas infelix	3	0.000247178
1	A1	Species	Alkaliphilus peptidifermentans	1	8.23926e-05
1	A1	Species	Anoxybacillus amylolyticus	3	0.000247178
1	A1	Species	Erwinia mallotivora	1	8.23926e-05
1	A1	Species	Flavobacterium kamogawaensis	3	0.000247178
1	A1	Species	Brevibacterium album	2	0.000164785
1	A1	Species	Phaeobacter inhibens	2	0.000164785
1	A1	Species	Flavobacterium saliperosum	1	8.23926e-05
1	A1	Species	Legionella taurinensis	1	8.23926e-05
1	A1	Species	Ochrobactrum rhizosphaerae	1	8.23926e-05
1	A1	Species	Bacillus beringensis	2	0.000164785
1	A1	Species	Geobacter hydrogenophilus	2	0.000164785
1	A1	Species	Lysobacter niabensis	1	8.23926e-05
1	A1	Species	Pseudomonas syncyanea	5	0.000411963
1	A1	Species	Mycoplasma edwardii	1	8.23926e-05
1	A1	Species	Xanthomonas oryzae	4	0.00032957
1	A1	Species	Methylophaga lonarensis	2	0.000164785
1	A1	Species	Desulfovibrio piger	2	0.000164785
1	A1	Species	Paenibacillus ruminocola	1	8.23926e-05
1	A1	Species	Streptosporangium purpuratum	1	8.23926e-05
1	A1	Species	Devosia geojensis	4	0.00032957
1	A1	Species	Lactobacillus versmoldensis	2	0.000164785
1	A1	Species	Rheinheimera chironomi	1	8.23926e-05
1	A1	Species	Thermobacillus xylanilyticus	1	8.23926e-05
1	A1	Species	Snowella rosea	1	8.23926e-05
1	A1	Species	Clostridium malenominatum	2	0.000164785
1	A1	Species	Ectothiorhodospira imhoffii	2	0.000164785
1	A1	Species	Weissella viridescens	1	8.23926e-05
1	A1	Species	Lactobacillus acidifarinae	1	8.23926e-05
1	A1	Species	Flavobacterium resistens	2	0.000164785
1	A1	Species	Lactobacillus hammesii	1	8.23926e-05
1	A1	Species	Rummeliibacillus pycnus	1	8.23926e-05
1	A1	Species	Paenibacillus pinihumi	2	0.000164785
1	A1	Species	Reinekea aestuarii	1	8.23926e-05
1	A1	Species	Methylobacillus flagellatus	1	8.23926e-05
1	A1	Species	Planomicrobium psychrophilum	1	8.23926e-05
1	A1	Species	Marinitoga hydrogenitolerans	1	8.23926e-05
1	A1	Species	Anaerofilum pentosovorans	1	8.23926e-05
1	A1	Species	Microcystis panniformis	2	0.000164785
1	A1	Species	Kaistobacter terrae	1	8.23926e-05
1	A1	Species	Streptococcus bovis	7	0.000576748
1	A1	Species	Psychrobacter phenylpyruvicus	1	8.23926e-05
1	A1	Species	Microbacterium halophilum	1	8.23926e-05
1	A1	Species	Pseudomonas taiwanensis	1	8.23926e-05
1	A1	Species	Oceanospirillum linum	2	0.000164785
1	A1	Species	Thermodesulfovibrio aggregans	1	8.23926e-05
1	A1	Species	Sphingomonas elodea	1	8.23926e-05
1	A1	Species	Alishewanella fetalis	1	8.23926e-05
1	A1	Species	Xenophilus azovorans	1	8.23926e-05
1	A1	Species	Actinobaculum suis	1	8.23926e-05
1	A1	Species	Shewanella vesiculosa	1	8.23926e-05
1	A1	Species	Pediococcus inopinatus	1	8.23926e-05
1	A1	Species	Halomonas almeriensis	5	0.000411963
1	A1	Species	Paenibacillus caespitis	4	0.00032957
1	A1	Species	Rhodoferax fermentans	1	8.23926e-05
1	A1	Species	Acinetobacter marinus	1	8.23926e-05
1	A1	Species	Acinetobacter xiamenensis	1	8.23926e-05
1	A1	Species	Clostridium histolyticum	1	8.23926e-05
1	A1	Species	Actinocatenispora thailandica	1	8.23926e-05
1	A1	Species	Ochrobactrum pecoris	1	8.23926e-05
1	A1	Species	Devosia chinhatensis	2	0.000164785
1	A1	Species	Schlegelella aquatica	1	8.23926e-05
1	A1	Species	Pseudomonas pavonaceae	1	8.23926e-05
1	A1	Species	Pseudomonas lundensis	4	0.00032957
1	A1	Species	Tepidanaerobacter syntrophicus	1	8.23926e-05
1	A1	Species	Pectinatus cerevisiiphilus	7	0.000576748
1	A1	Species	Desulfuromonas svalbardensis	2	0.000164785
1	A1	Species	Methylobacterium goesingense	1	8.23926e-05
1	A1	Species	Propionibacterium humerusii	1	8.23926e-05
1	A1	Species	Carnobacterium mobile	1	8.23926e-05
1	A1	Species	Caldanaerobacter hydrothermalis	1	8.23926e-05
1	A1	Species	Neorickettsia helminthoeca	2	0.000164785
1	A1	Species	Sphingobium aromaticiconvertens	1	8.23926e-05
1	A1	Species	Candidatus Contubernalis alkalaceticum	1	8.23926e-05
1	A1	Species	Sphingomonas japonica	1	8.23926e-05
1	A1	Species	Campylobacter canadensis	1	8.23926e-05
1	A1	Species	Actinoplanes pallidoaurantiacus	1	8.23926e-05
1	A1	Species	Zobellia laminariae	1	8.23926e-05
1	A1	Species	Treponema zioleckii	1	8.23926e-05
1	A1	Species	Legionella waltersii	1	8.23926e-05
1	A1	Species	Gemella cunicula	3	0.000247178
1	A1	Species	Bartonella weissi	1	8.23926e-05
1	A1	Species	Salinivibrio budaii	3	0.000247178
1	A1	Species	Thermomonas brevis	1	8.23926e-05
1	A1	Species	Microbacterium marinilacus	1	8.23926e-05
1	A1	Species	Vagococcus salmoninarum	1	8.23926e-05
1	A1	Species	Psychrobacter vallis	1	8.23926e-05
1	A1	Species	Moritella yayanosii	2	0.000164785
1	A1	Species	Mesorhizobium camelthorni	1	8.23926e-05
1	A1	Species	Salinibacterium xinjiangense	1	8.23926e-05
1	A1	Species	Arcobacter marinus	1	8.23926e-05
1	A1	Species	Flavobacterium frigidimaris	1	8.23926e-05
1	A1	Species	Thermobaculum terrenum	2	0.000164785
1	A1	Species	Marinomonas arenicola	1	8.23926e-05
1	A1	Species	Actinopolyspora indiensis	1	8.23926e-05
1	A1	Species	Tetragenococcus solitarius	1	8.23926e-05
1	A1	Species	Vibrio litoralis	1	8.23926e-05
1	A1	Species	Hyphomicrobium sulfonivorans	1	8.23926e-05
1	A1	Species	Thiothrix fructosivorans	1	8.23926e-05
1	A1	Species	Bacillus anthracis	2	0.000164785
1	A1	Species	Bartonella rochalimae	2	0.000164785
1	A1	Species	Shewanella irciniae	1	8.23926e-05
1	A1	Species	Enterococcus hermanniensis	1	8.23926e-05
1	A1	Species	Chryseobacterium joostei	1	8.23926e-05
1	A1	Species	Pasteurella pneumotropica	1	8.23926e-05
1	A1	Species	Bacillus azotoformans	2	0.000164785
1	A1	Species	Exiguobacterium taiwanense	1	8.23926e-05
1	A1	Species	Mesorhizobium huakuii	1	8.23926e-05
1	A1	Species	Heliorestis baculata	2	0.000164785
1	A1	Species	Paracoccus kamogawaensis	1	8.23926e-05
1	A1	Species	Amaricoccus tamworthensis	1	8.23926e-05
1	A1	Species	Flavobacterium weaverense	2	0.000164785
1	A1	Species	Ureibacillus thermophilus	1	8.23926e-05
1	A1	Species	Caldithrix palaeochoryensis	1	8.23926e-05
1	A1	Species	Geobacter grbiciae	1	8.23926e-05
1	A1	Species	Kurthia sibirica	1	8.23926e-05
1	A1	Species	Actinocorallia herbida	1	8.23926e-05
1	A1	Species	Bacillus carboniphilus	1	8.23926e-05
1	A1	Species	Bifidobacterium subtile	1	8.23926e-05
1	A1	Species	Anaeroplasma abactoclasticum	3	0.000247178
1	A1	Species	Hydrogenophilus denitrificans	1	8.23926e-05
1	A1	Species	Pseudomonas lini	1	8.23926e-05
1	A1	Species	Brevundimonas olei	1	8.23926e-05
1	A1	Species	Weissella soli	1	8.23926e-05
1	A1	Species	Vagococcus carniphilus	1	8.23926e-05
1	A1	Species	Sanguibacter suarezii	1	8.23926e-05
1	A1	Species	Opitutus terrae	1	8.23926e-05
1	A1	Species	Ammonifex thiophilus	1	8.23926e-05
1	A1	Species	Nostoc piscinale	1	8.23926e-05
1	A1	Species	Pseudomonas fluorescens	1	8.23926e-05
1	A1	Species	Pseudomonas veronii	2	0.000164785
1	A1	Species	Pseudomonas panacis	1	8.23926e-05
1	A1	Species	Bacillus plakortidis	1	8.23926e-05
2	A2	Kingdom	Unclassified	958	0.294685
2	A2	Kingdom	Bacteria	324134	99.705
2	A2	Kingdom	Viruses	1	0.000307604
2	A2	Phylum	Unclassified	2308	0.709951
2	A2	Phylum	Proteobacteria	283992	87.3572
2	A2	Phylum	Firmicutes	17611	5.41722
2	A2	Phylum	Actinobacteria	6662	2.04926
2	A2	Phylum	Verrucomicrobia	1436	0.44172
2	A2	Phylum	Bacteroidetes	7767	2.38916
2	A2	Phylum	Fusobacteria	3599	1.10707
2	A2	Phylum	Tenericutes	221	0.0679806
2	A2	Phylum	Chlamydiae	497	0.152879
2	A2	Phylum	Planctomycetes	848	0.260848
2	A2	Phylum	Thermotogae	25	0.00769011
2	A2	Phylum	Caldithrix	6	0.00184563
2	A2	Phylum	Thermi	14	0.00430646
2	A2	Phylum	Cyanobacteria	64	0.0196867
2	A2	Phylum	Spirochaetes	11	0.00338365
2	A2	Phylum	Chloroflexi	23	0.0070749
2	A2	Phylum	Nitrospirae	3	0.000922813
2	A2	Phylum	DNA	1	0.000307604
2	A2	Phylum	Acidobacteria	2	0.000615209
2	A2	Phylum	Fibrobacteres	2	0.000615209
2	A2	Phylum	Deferribacteres	1	0.000307604
2	A2	Class	Unclassified	3231	0.993869
2	A2	Class	Betaproteobacteria	231442	71.1925
2	A2	Class	Bacilli	16688	5.1333
2	A2	Class	Gammaproteobacteria	27669	8.5111
2	A2	Class	Alphaproteobacteria	21255	6.53813
2	A2	Class	Actinobacteria	6613	2.03419
2	A2	Class	Deltaproteobacteria	2490	0.765935
2	A2	Class	Verrucomicrobiae	1265	0.389119
2	A2	Class	Sphingobacteriia	1940	0.596752
2	A2	Class	Fusobacteria	3599	1.10707
2	A2	Class	Flavobacteriia	3533	1.08677
2	A2	Class	Clostridia	616	0.189484
2	A2	Class	Erysipelotrichi	247	0.0759783
2	A2	Class	Bacteroidia	2270	0.698262
2	A2	Class	Mollicutes	221	0.0679806
2	A2	Class	Chlamydiia	497	0.152879
2	A2	Class	Planctomycetia	845	0.259926
2	A2	Class	Epsilonproteobacteria	345	0.106123
2	A2	Class	Thermotogae	25	0.00769011
2	A2	Class	Caldithrixae	6	0.00184563
2	A2	Class	Deinococci	14	0.00430646
2	A2	Class	Acidimicrobiia	22	0.00676729
2	A2	Class	Opitutae	125	0.0384505
2	A2	Class	Nostocophycideae	18	0.00553688
2	A2	Class	Spirochaetes	11	0.00338365
2	A2	Class	Oscillatoriophycideae	20	0.00615208
2	A2	Class	Ktedonobacteria	13	0.00399886
2	A2	Class	Anaerolineae	10	0.00307604
2	A2	Class	Spartobacteria	42	0.0129194
2	A2	Class	Nitriliruptoria	5	0.00153802
2	A2	Class	Nitrospira	3	0.000922813
2	A2	Class	Synechococcophycideae	2	0.000615209
2	A2	Class	Group II	1	0.000307604
2	A2	Class	Acidobacteria	2	0.000615209
2	A2	Class	Fibrobacteria	2	0.000615209
2	A2	Class	Brocadiae	3	0.000922813
2	A2	Class	Methylacidiphilae	2	0.000615209
2	A2	Class	Deferribacteres	1	0.000307604
2	A2	Order	Unclassified	6226	1.91514
2	A2	Order	Burkholderiales	218753	67.2894
2	A2	Order	Bacillales	15012	4.61775
2	A2	Order	Neisseriales	9155	2.81612
2	A2	Order	Thiotrichales	5955	1.83178
2	A2	Order	Rickettsiales	8409	2.58664
2	A2	Order	Actinomycetales	6058	1.86347
2	A2	Order	Sphingomonadales	8701	2.67646
2	A2	Order	Rhodocyclales	1842	0.566607
2	A2	Order	Enterobacteriales	14358	4.41658
2	A2	Order	Desulfovibrionales	2395	0.736712
2	A2	Order	Aeromonadales	594	0.182717
2	A2	Order	Verrucomicrobiales	1265	0.389119
2	A2	Order	Sphingobacteriales	1940	0.596752
2	A2	Order	Rhizobiales	1281	0.394041
2	A2	Order	Rhodobacterales	1994	0.613363
2	A2	Order	Pseudomonadales	3220	0.990486
2	A2	Order	Oceanospirillales	378	0.116274
2	A2	Order	Fusobacteriales	3599	1.10707
2	A2	Order	Flavobacteriales	3533	1.08677
2	A2	Order	Rhodospirillales	773	0.237778
2	A2	Order	Alteromonadales	864	0.26577
2	A2	Order	Lactobacillales	1295	0.398348
2	A2	Order	Xanthomonadales	640	0.196867
2	A2	Order	Methylococcales	253	0.0778239
2	A2	Order	Clostridiales	564	0.173489
2	A2	Order	Erysipelotrichales	247	0.0759783
2	A2	Order	Bacteroidales	2270	0.698262
2	A2	Order	Mycoplasmatales	160	0.0492167
2	A2	Order	Gallionellales	38	0.011689
2	A2	Order	Desulfuromonadales	72	0.0221475
2	A2	Order	Chlamydiales	497	0.152879
2	A2	Order	Bifidobacteriales	549	0.168875
2	A2	Order	Planctomycetales	479	0.147342
2	A2	Order	Chromatiales	206	0.0633665
2	A2	Order	Methylophilales	136	0.0418342
2	A2	Order	Acholeplasmatales	60	0.0184563
2	A2	Order	Thermicanales	12	0.00369125
2	A2	Order	Vibrionales	45	0.0138422
2	A2	Order	Legionellales	121	0.0372201
2	A2	Order	Campylobacterales	345	0.106123
2	A2	Order	Thermotogales	25	0.00769011
2	A2	Order	Caldithrixales	6	0.00184563
2	A2	Order	Exiguobacterales	49	0.0150726
2	A2	Order	Thermales	12	0.00369125
2	A2	Order	Pirellulales	248	0.0762859
2	A2	Order	Gemmatales	84	0.0258388
2	A2	Order	Coriobacteriales	19	0.00584448
2	A2	Order	Caulobacterales	7	0.00215323
2	A2	Order	Acidimicrobiales	22	0.00676729
2	A2	Order	Opitutales	115	0.0353745
2	A2	Order	Syntrophobacterales	11	0.00338365
2	A2	Order	Stigonematales	14	0.00430646
2	A2	Order	Spirochaetales	6	0.00184563
2	A2	Order	Turicibacterales	1	0.000307604
2	A2	Order	Thermoanaerobacterales	13	0.00399886
2	A2	Order	Chroococcales	20	0.00615208
2	A2	Order	Gemellales	2	0.000615209
2	A2	Order	Thermogemmatisporales	13	0.00399886
2	A2	Order	Caldilineales	6	0.00184563
2	A2	Order	Pelagicoccales	9	0.00276844
2	A2	Order	Chthoniobacterales	42	0.0129194
2	A2	Order	Borreliales	5	0.00153802
2	A2	Order	Halanaerobiales	6	0.00184563
2	A2	Order	Euzebyales	5	0.00153802
2	A2	Order	Pasteurellales	5	0.00153802
2	A2	Order	Nitrospirales	3	0.000922813
2	A2	Order	Nostocales	4	0.00123042
2	A2	Order	Nitrosomonadales	1	0.000307604
2	A2	Order	Puniceicoccales	1	0.000307604
2	A2	Order	Pseudanabaenales	2	0.000615209
2	A2	Order	Kiloniellales	3	0.000922813
2	A2	Order	(Microviridae)	1	0.000307604
2	A2	Order	Hydrogenophilales	16	0.00492167
2	A2	Order	Acidobacteriales	2	0.000615209
2	A2	Order	Fibrobacterales	2	0.000615209
2	A2	Order	Deinococcales	2	0.000615209
2	A2	Order	Brocadiales	3	0.000922813
2	A2	Order	Thiohalorhabdales	1	0.000307604
2	A2	Order	Methylacidiphilales	2	0.000615209
2	A2	Order	Anaerolineales	4	0.00123042
2	A2	Order	Deferribacterales	1	0.000307604
2	A2	Order	Myxococcales	1	0.000307604
2	A2	Order	Natranaerobiales	3	0.000922813
2	A2	Order	Entomoplasmatales	1	0.000307604
2	A2	Order	Bdellovibrionales	1	0.000307604
2	A2	Family	Unclassified	16579	5.09977
2	A2	Family	Comamonadaceae	216046	66.4567
2	A2	Family	Paenibacillaceae	1312	0.403577
2	A2	Family	Neisseriaceae	9155	2.81612
2	A2	Family	Bacillaceae	8755	2.69307
2	A2	Family	Piscirickettsiaceae	543	0.167029
2	A2	Family	Rickettsiaceae	8391	2.58111
2	A2	Family	Actinomycetaceae	4375	1.34577
2	A2	Family	Sphingomonadaceae	8623	2.65247
2	A2	Family	Rhodocyclaceae	1842	0.566607
2	A2	Family	Enterobacteriaceae	14358	4.41658
2	A2	Family	Desulfovibrionaceae	2389	0.734867
2	A2	Family	Aeromonadaceae	594	0.182717
2	A2	Family	Verrucomicrobiaceae	1265	0.389119
2	A2	Family	Sphingobacteriaceae	443	0.136269
2	A2	Family	Xanthobacteraceae	397	0.122119
2	A2	Family	Listeriaceae	154	0.0473711
2	A2	Family	Rhodobacteraceae	1990	0.612132
2	A2	Family	Pseudomonadaceae	2888	0.888361
2	A2	Family	Oceanospirillaceae	212	0.0652121
2	A2	Family	Fusobacteriaceae	3594	1.10553
2	A2	Family	Oxalobacteraceae	1516	0.466328
2	A2	Family	Flavobacteriaceae	3533	1.08677
2	A2	Family	Amoebophilaceae	980	0.301452
2	A2	Family	Acetobacteraceae	623	0.191637
2	A2	Family	Alteromonadaceae	529	0.162723
2	A2	Family	Enterococcaceae	276	0.0848988
2	A2	Family	Xanthomonadaceae	589	0.181179
2	A2	Family	Rhodospirillaceae	123	0.0378353
2	A2	Family	Methylococcaceae	253	0.0778239
2	A2	Family	Chitinophagaceae	412	0.126733
2	A2	Family	Clostridiaceae	373	0.114736
2	A2	Family	Erysipelotrichaceae	247	0.0759783
2	A2	Family	Corynebacteriaceae	138	0.0424494
2	A2	Family	Cellulomonadaceae	53	0.016303
2	A2	Family	Porphyromonadaceae	2234	0.687188
2	A2	Family	Glycomycetaceae	73	0.0224551
2	A2	Family	Thiotrichaceae	1077	0.33129
2	A2	Family	Moraxellaceae	331	0.101817
2	A2	Family	Streptococcaceae	242	0.0744402
2	A2	Family	Microbacteriaceae	482	0.148265
2	A2	Family	Mycoplasmataceae	160	0.0492167
2	A2	Family	Sanguibacteraceae	25	0.00769011
2	A2	Family	Promicromonosporaceae	310	0.0953573
2	A2	Family	Burkholderiaceae	214	0.0658273
2	A2	Family	Gallionellaceae	38	0.011689
2	A2	Family	Shewanellaceae	128	0.0393734
2	A2	Family	Parachlamydiaceae	242	0.0744402
2	A2	Family	Bifidobacteriaceae	549	0.168875
2	A2	Family	Planctomycetaceae	479	0.147342
2	A2	Family	Lactobacillaceae	563	0.173181
2	A2	Family	Methylophilaceae	136	0.0418342
2	A2	Family	Halomonadaceae	143	0.0439874
2	A2	Family	Propionibacteriaceae	31	0.00953573
2	A2	Family	Desulfuromonadaceae	10	0.00307604
2	A2	Family	Acholeplasmataceae	60	0.0184563
2	A2	Family	Waddliaceae	160	0.0492167
2	A2	Family	Thermicanaceae	12	0.00369125
2	A2	Family	Pseudoalteromonadaceae	83	0.0255312
2	A2	Family	Vibrionaceae	45	0.0138422
2	A2	Family	Legionellaceae	116	0.0356821
2	A2	Family	Bradyrhizobiaceae	156	0.0479863
2	A2	Family	Hyphomicrobiaceae	78	0.0239931
2	A2	Family	Methylocystaceae	1	0.000307604
2	A2	Family	Campylobacteraceae	265	0.0815151
2	A2	Family	Rhizobiaceae	595	0.183025
2	A2	Family	Thermotogaceae	25	0.00769011
2	A2	Family	Chromatiaceae	140	0.0430646
2	A2	Family	Alcaligenaceae	94	0.0289148
2	A2	Family	Planococcaceae	236	0.0725946
2	A2	Family	Caldithrixaceae	6	0.00184563
2	A2	Family	Ectothiorhodospiraceae	128	0.0393734
2	A2	Family	Flexibacteraceae	14	0.00430646
2	A2	Family	Anaplasmataceae	15	0.00461406
2	A2	Family	Exiguobacteraceae	49	0.0150726
2	A2	Family	Sinobacteraceae	51	0.0156878
2	A2	Family	Sporolactobacillaceae	17	0.00522927
2	A2	Family	Francisellaceae	2	0.000615209
2	A2	Family	Thermaceae	12	0.00369125
2	A2	Family	Pseudonocardiaceae	87	0.0267616
2	A2	Family	Nocardioidaceae	101	0.031068
2	A2	Family	Pirellulaceae	248	0.0762859
2	A2	Family	Eubacteriaceae	14	0.00430646
2	A2	Family	Lachnospiraceae	92	0.0282996
2	A2	Family	Isosphaeraceae	84	0.0258388
2	A2	Family	Erythrobacteraceae	66	0.0203019
2	A2	Family	Streptosporangiaceae	76	0.0233779
2	A2	Family	Geobacteraceae	54	0.0166106
2	A2	Family	Helicobacteraceae	77	0.0236855
2	A2	Family	Streptomycetaceae	45	0.0138422
2	A2	Family	Staphylococcaceae	27	0.00830532
2	A2	Family	Bogoriellaceae	24	0.0073825
2	A2	Family	Coriobacteriaceae	19	0.00584448
2	A2	Family	Peptococcaceae	28	0.00861292
2	A2	Family	Caulobacteraceae	7	0.00215323
2	A2	Family	Acidimicrobiaceae	22	0.00676729
2	A2	Family	Opitutaceae	115	0.0353745
2	A2	Family	Desulfobacteraceae	8	0.00246083
2	A2	Family	Leuconostocaceae	17	0.00522927
2	A2	Family	Rivulariaceae	14	0.00430646
2	A2	Family	Spirochaetaceae	6	0.00184563
2	A2	Family	Carnobacteriaceae	24	0.0073825
2	A2	Family	Rhabdochlamydiaceae	50	0.0153802
2	A2	Family	Litoricolaceae	8	0.00246083
2	A2	Family	Turicibacteraceae	1	0.000307604
2	A2	Family	Caldicellulosiruptoraceae	8	0.00246083
2	A2	Family	Dermabacteraceae	3	0.000922813
2	A2	Family	Phormidiaceae	17	0.00522927
2	A2	Family	Gemellaceae	2	0.000615209
2	A2	Family	Thermogemmatisporaceae	13	0.00399886
2	A2	Family	Desulfonatronumaceae	2	0.000615209
2	A2	Family	Caldilineaceae	6	0.00184563
2	A2	Family	Pelagicoccaceae	9	0.00276844
2	A2	Family	Idiomarinaceae	38	0.011689
2	A2	Family	Leptotrichiaceae	5	0.00153802
2	A2	Family	Veillonellaceae	24	0.0073825
2	A2	Family	Chthoniobacteraceae	42	0.0129194
2	A2	Family	Borreliaceae	5	0.00153802
2	A2	Family	Nocardiaceae	9	0.00276844
2	A2	Family	Methylobacteriaceae	5	0.00153802
2	A2	Family	Halanaerobiaceae	6	0.00184563
2	A2	Family	Euzebyaceae	5	0.00153802
2	A2	Family	Bartonellaceae	7	0.00215323
2	A2	Family	Bacteroidaceae	12	0.00369125
2	A2	Family	Heliobacteriaceae	4	0.00123042
2	A2	Family	Pasteurellaceae	5	0.00153802
2	A2	Family	Thermodesulfovibrionaceae	3	0.000922813
2	A2	Family	Nostocaceae	4	0.00123042
2	A2	Family	Thermomonosporaceae	6	0.00184563
2	A2	Family	Micrococcaceae	20	0.00615208
2	A2	Family	Syntrophobacteraceae	1	0.000307604
2	A2	Family	Nitrosomonadaceae	1	0.000307604
2	A2	Family	Phyllobacteriaceae	16	0.00492167
2	A2	Family	Aurantimonadaceae	1	0.000307604
2	A2	Family	Thermoanaerobacteraceae	5	0.00153802
2	A2	Family	Puniceicoccaceae	1	0.000307604
2	A2	Family	Pseudanabaenaceae	2	0.000615209
2	A2	Family	Intrasporangiaceae	1	0.000307604
2	A2	Family	Alcanivoracaceae	5	0.00153802
2	A2	Family	Kiloniellaceae	3	0.000922813
2	A2	Family	Microviridae	1	0.000307604
2	A2	Family	Aerococcaceae	13	0.00399886
2	A2	Family	Micromonosporaceae	3	0.000922813
2	A2	Family	Hydrogenophilaceae	16	0.00492167
2	A2	Family	Rhodothermaceae	16	0.00492167
2	A2	Family	Psychromonadaceae	1	0.000307604
2	A2	Family	Coxiellaceae	3	0.000922813
2	A2	Family	Thermoactinomycetaceae	1	0.000307604
2	A2	Family	Acidobacteriaceae	2	0.000615209
2	A2	Family	Ruminococcaceae	8	0.00246083
2	A2	Family	Fibrobacteraceae	2	0.000615209
2	A2	Family	Microcystaceae	1	0.000307604
2	A2	Family	Desulfohalobiaceae	1	0.000307604
2	A2	Family	Deinococcaceae	2	0.000615209
2	A2	Family	Hyphomonadaceae	3	0.000922813
2	A2	Family	Flammeovirgaceae	1	0.000307604
2	A2	Family	Brocadiaceae	3	0.000922813
2	A2	Family	Moritellaceae	2	0.000615209
2	A2	Family	Brevibacteriaceae	1	0.000307604
2	A2	Family	Pelobacteraceae	1	0.000307604
2	A2	Family	Saccharospirillaceae	1	0.000307604
2	A2	Family	Thiohalorhabdaceae	1	0.000307604
2	A2	Family	Methylacidiphilaceae	2	0.000615209
2	A2	Family	Gomphosphaeriaceae	1	0.000307604
2	A2	Family	Anaerolinaceae	4	0.00123042
2	A2	Family	Deferribacteraceae	1	0.000307604
2	A2	Family	Actinosynnemataceae	2	0.000615209
2	A2	Family	Cystobacteraceae	1	0.000307604
2	A2	Family	Actinopolysporaceae	1	0.000307604
2	A2	Family	Brucellaceae	2	0.000615209
2	A2	Family	Anaerobrancaceae	3	0.000922813
2	A2	Family	Mycobacteriaceae	1	0.000307604
2	A2	Family	Entomoplasmataceae	1	0.000307604
2	A2	Family	Syntrophomonadaceae	1	0.000307604
2	A2	Family	Bacteriovoracaceae	1	0.000307604
2	A2	Family	Syntrophaceae	1	0.000307604
2	A2	Family	Tsukamurellaceae	1	0.000307604
2	A2	Genus	Unclassified	99349	30.5602
2	A2	Genus	Rhodoferax	117101	36.0208
2	A2	Genus	Polaromonas	379	0.116582
2	A2	Genus	Comamonas	1763	0.542306
2	A2	Genus	Paenibacillus	1029	0.316525
2	A2	Genus	Giesbergeria	7168	2.20491
2	A2	Genus	Curvibacter	4621	1.42144
2	A2	Genus	Tepidimonas	898	0.276229
2	A2	Genus	Deefgea	7031	2.16277
2	A2	Genus	Virgibacillus	7331	2.25505
2	A2	Genus	Cycloclasticus	535	0.164568
2	A2	Genus	Rickettsia	8391	2.58111
2	A2	Genus	Sphingomonas	7399	2.27596
2	A2	Genus	Dechloromonas	1525	0.469097
2	A2	Genus	Plesiomonas	1594	0.490321
2	A2	Genus	Vogesella	523	0.160877
2	A2	Genus	Bacillus	1066	0.327906
2	A2	Genus	Desulfovibrio	2389	0.734867
2	A2	Genus	Hydrogenophaga	2321	0.71395
2	A2	Genus	Providencia	50	0.0153802
2	A2	Genus	Yersinia	11052	3.39964
2	A2	Genus	Tolumonas	594	0.182717
2	A2	Genus	Aquitalea	837	0.257465
2	A2	Genus	Luteolibacter	1249	0.384198
2	A2	Genus	Pedobacter	441	0.135654
2	A2	Genus	Labrys	180	0.0553688
2	A2	Genus	Brochothrix	77	0.0236855
2	A2	Genus	Paucibacter	823	0.253158
2	A2	Genus	Rhodobacter	1590	0.489091
2	A2	Genus	Pseudomonas	2399	0.737943
2	A2	Genus	Enterobacter	12	0.00369125
2	A2	Genus	Oceanospirillum	134	0.041219
2	A2	Genus	Propionigenium	1435	0.441412
2	A2	Genus	Cetobacterium	1895	0.58291
2	A2	Genus	Polynucleobacter	86	0.026454
2	A2	Genus	Flavobacterium	3312	1.01879
2	A2	Genus	Candidatus Amoebophilus	979	0.301145
2	A2	Genus	Arsenophonus	51	0.0156878
2	A2	Genus	Serratia	315	0.0968954
2	A2	Genus	Delftia	2193	0.674576
2	A2	Genus	Acidisoma	185	0.0569068
2	A2	Genus	Cellvibrio	469	0.144266
2	A2	Genus	Tetragenococcus	151	0.0464483
2	A2	Genus	Thiomonas	145	0.0446026
2	A2	Genus	Pseudoxanthomonas	271	0.0833608
2	A2	Genus	Rhodospirillum	12	0.00369125
2	A2	Genus	Methylocaldum	253	0.0778239
2	A2	Genus	Clostridium	349	0.107354
2	A2	Genus	Oxalobacter	312	0.0959725
2	A2	Genus	Brevibacillus	233	0.0716718
2	A2	Genus	Erysipelothrix	217	0.0667501
2	A2	Genus	Corynebacterium	138	0.0424494
2	A2	Genus	Novosphingobium	176	0.0541384
2	A2	Genus	Chromobacterium	567	0.174412
2	A2	Genus	Demequina	30	0.00922813
2	A2	Genus	Acidovorax	1567	0.482016
2	A2	Genus	Leptothrix	291	0.0895129
[truncated: 21,491 more rows]

## Sheet: Figure 1-source data 1E
SampleNumber	SampleName	Level	Group	Reads	Percentage
1	A1	Kingdom	Unclassified	23193	2.68649
1	A1	Kingdom	Bacteria	840103	97.3108
1	A1	Kingdom	Viruses	23	0.00266414
1	A1	Phylum	Unclassified	24416	2.82816
1	A1	Phylum	Bacteroidetes	696479	80.6746
1	A1	Phylum	Proteobacteria	142101	16.4598
1	A1	Phylum	Firmicutes	79	0.00915073
1	A1	Phylum	Tenericutes	100	0.0115832
1	A1	Phylum	Actinobacteria	8	0.000926656
1	A1	Phylum	DNA	23	0.00266414
1	A1	Phylum	Chrysiogenetes	4	0.000463328
1	A1	Phylum	Chlamydiae	57	0.00660243
1	A1	Phylum	Planctomycetes	41	0.00474911
1	A1	Phylum	Cyanobacteria	6	0.000694992
1	A1	Phylum	Verrucomicrobia	3	0.000347496
1	A1	Phylum	Thermi	1	0.000115832
1	A1	Phylum	Spirochaetes	1	0.000115832
1	A1	Class	Unclassified	24950	2.89001
1	A1	Class	Sphingobacteriia	696146	80.636
1	A1	Class	Betaproteobacteria	139920	16.2072
1	A1	Class	Bacteroidia	35	0.00405412
1	A1	Class	Flavobacteriia	200	0.0231664
1	A1	Class	Gammaproteobacteria	678	0.0785341
1	A1	Class	Alphaproteobacteria	1029	0.119191
1	A1	Class	Clostridia	18	0.00208498
1	A1	Class	Mollicutes	100	0.0115832
1	A1	Class	Actinobacteria	8	0.000926656
1	A1	Class	Bacilli	60	0.00694992
1	A1	Class	Group II	23	0.00266414
1	A1	Class	Epsilonproteobacteria	19	0.00220081
1	A1	Class	Chrysiogenetes	4	0.000463328
1	A1	Class	Chlamydiia	57	0.00660243
1	A1	Class	Deltaproteobacteria	20	0.00231664
1	A1	Class	Planctomycetia	41	0.00474911
1	A1	Class	Nostocophycideae	4	0.000463328
1	A1	Class	Oscillatoriophycideae	2	0.000231664
1	A1	Class	Opitutae	2	0.000231664
1	A1	Class	Deinococci	1	0.000115832
1	A1	Class	Verrucomicrobiae	1	0.000115832
1	A1	Class	Spirochaetes	1	0.000115832
1	A1	Order	Unclassified	26407	3.05878
1	A1	Order	Sphingobacteriales	696146	80.636
1	A1	Order	Burkholderiales	132435	15.3402
1	A1	Order	Neisseriales	6062	0.702174
1	A1	Order	Bacteroidales	35	0.00405412
1	A1	Order	Flavobacteriales	200	0.0231664
1	A1	Order	Enterobacteriales	40	0.00463328
1	A1	Order	Sphingomonadales	36	0.00416995
1	A1	Order	Thiotrichales	20	0.00231664
1	A1	Order	Oceanospirillales	21	0.00243247
1	A1	Order	Clostridiales	9	0.00104249
1	A1	Order	Pseudomonadales	275	0.0318538
1	A1	Order	Rickettsiales	303	0.0350971
1	A1	Order	Acholeplasmatales	98	0.0113515
1	A1	Order	Rhizobiales	626	0.0725109
1	A1	Order	Bifidobacteriales	3	0.000347496
1	A1	Order	Alteromonadales	216	0.0250197
1	A1	Order	Lactobacillales	4	0.000463328
1	A1	Order	Legionellales	29	0.00335913
1	A1	Order	Rhodocyclales	33	0.00382246
1	A1	Order	Bacillales	56	0.00648659
1	A1	Order	Chromatiales	2	0.000231664
1	A1	Order	(Microviridae)	23	0.00266414
1	A1	Order	Campylobacterales	19	0.00220081
1	A1	Order	Chrysiogenales	4	0.000463328
1	A1	Order	Chlamydiales	57	0.00660243
1	A1	Order	Rhodobacterales	12	0.00138999
1	A1	Order	Syntrophobacterales	14	0.00162165
1	A1	Order	Aeromonadales	1	0.000115832
1	A1	Order	Xanthomonadales	18	0.00208498
1	A1	Order	Pirellulales	40	0.00463328
1	A1	Order	Rhodospirillales	30	0.00347496
1	A1	Order	Nostocales	3	0.000347496
1	A1	Order	Gallionellales	5	0.00057916
1	A1	Order	Desulfovibrionales	5	0.00057916
1	A1	Order	Thermoanaerobacterales	6	0.000694992
1	A1	Order	Bdellovibrionales	1	0.000115832
1	A1	Order	Methylophilales	3	0.000347496
1	A1	Order	Actinomycetales	5	0.00057916
1	A1	Order	Caulobacterales	1	0.000115832
1	A1	Order	Mycoplasmatales	2	0.000231664
1	A1	Order	Chroococcales	2	0.000231664
1	A1	Order	Pasteurellales	4	0.000463328
1	A1	Order	Halanaerobiales	1	0.000115832
1	A1	Order	Puniceicoccales	1	0.000115832
1	A1	Order	Deinococcales	1	0.000115832
1	A1	Order	Planctomycetales	1	0.000115832
1	A1	Order	Stigonematales	1	0.000115832
1	A1	Order	Verrucomicrobiales	1	0.000115832
1	A1	Order	Natranaerobiales	1	0.000115832
1	A1	Order	Borreliales	1	0.000115832
1	A1	Family	Unclassified	41964	4.86078
1	A1	Family	Amoebophilaceae	619080	71.7093
1	A1	Family	Oxalobacteraceae	37002	4.28602
1	A1	Family	Chitinophagaceae	57888	6.70528
1	A1	Family	Comamonadaceae	95078	11.0131
1	A1	Family	Sphingobacteriaceae	3886	0.450123
1	A1	Family	Neisseriaceae	6062	0.702174
1	A1	Family	Porphyromonadaceae	35	0.00405412
1	A1	Family	Flavobacteriaceae	200	0.0231664
1	A1	Family	Enterobacteriaceae	40	0.00463328
1	A1	Family	Sphingomonadaceae	36	0.00416995
1	A1	Family	Thiotrichaceae	14	0.00162165
1	A1	Family	Oceanospirillaceae	8	0.000926656
1	A1	Family	Eubacteriaceae	1	0.000115832
1	A1	Family	Pseudomonadaceae	252	0.0291897
1	A1	Family	Rickettsiaceae	285	0.0330121
1	A1	Family	Acholeplasmataceae	98	0.0113515
1	A1	Family	Burkholderiaceae	97	0.0112357
1	A1	Family	Bradyrhizobiaceae	24	0.00277997
1	A1	Family	Bifidobacteriaceae	3	0.000347496
1	A1	Family	Shewanellaceae	132	0.0152898
1	A1	Family	Enterococcaceae	3	0.000347496
1	A1	Family	Anaplasmataceae	18	0.00208498
1	A1	Family	Legionellaceae	23	0.00266414
1	A1	Family	Rhodocyclaceae	33	0.00382246
1	A1	Family	Staphylococcaceae	51	0.00590743
1	A1	Family	Chromatiaceae	1	0.000115832
1	A1	Family	Methylobacteriaceae	239	0.0276839
1	A1	Family	Microviridae	23	0.00266414
1	A1	Family	Helicobacteraceae	16	0.00185331
1	A1	Family	Litoricolaceae	11	0.00127415
1	A1	Family	Chrysiogenaceae	4	0.000463328
1	A1	Family	Rhabdochlamydiaceae	38	0.00440162
1	A1	Family	Alteromonadaceae	75	0.0086874
1	A1	Family	Rhizobiaceae	57	0.00660243
1	A1	Family	Phyllobacteriaceae	160	0.0185331
1	A1	Family	Parachlamydiaceae	8	0.000926656
1	A1	Family	Rhodobacteraceae	8	0.000926656
1	A1	Family	Syntrophaceae	6	0.000694992
1	A1	Family	Flammeovirgaceae	5	0.00057916
1	A1	Family	Aeromonadaceae	1	0.000115832
1	A1	Family	Xanthomonadaceae	18	0.00208498
1	A1	Family	Moraxellaceae	23	0.00266414
1	A1	Family	Pirellulaceae	40	0.00463328
1	A1	Family	Xanthobacteraceae	6	0.000694992
1	A1	Family	Flexibacteraceae	25	0.0028958
1	A1	Family	Rhodospirillaceae	24	0.00277997
1	A1	Family	Hyphomicrobiaceae	109	0.0126257
1	A1	Family	Rhodothermaceae	1	0.000115832
1	A1	Family	Francisellaceae	5	0.00057916
1	A1	Family	Nostocaceae	3	0.000347496
1	A1	Family	Saprospiraceae	9	0.00104249
1	A1	Family	Gallionellaceae	5	0.00057916
1	A1	Family	Desulfonatronumaceae	3	0.000347496
1	A1	Family	Desulfobacteraceae	7	0.000810824
1	A1	Family	Ruminococcaceae	1	0.000115832
1	A1	Family	Syntrophobacteraceae	1	0.000115832
1	A1	Family	Caldicellulosiruptoraceae	6	0.000694992
1	A1	Family	Bdellovibrionaceae	1	0.000115832
1	A1	Family	Halomonadaceae	2	0.000231664
1	A1	Family	Idiomarinaceae	6	0.000694992
1	A1	Family	Methylophilaceae	3	0.000347496
1	A1	Family	Piscirickettsiaceae	6	0.000694992
1	A1	Family	Glycomycetaceae	3	0.000347496
1	A1	Family	Bacillaceae	4	0.000463328
1	A1	Family	Acetobacteraceae	5	0.00057916
1	A1	Family	Campylobacteraceae	3	0.000347496
1	A1	Family	Caulobacteraceae	1	0.000115832
1	A1	Family	Mycoplasmataceae	2	0.000231664
1	A1	Family	Desulfovibrionaceae	2	0.000231664
1	A1	Family	Chroococcaceae	1	0.000115832
1	A1	Family	Pasteurellaceae	4	0.000463328
1	A1	Family	Clostridiaceae	5	0.00057916
1	A1	Family	Waddliaceae	2	0.000231664
1	A1	Family	Halanaerobiaceae	1	0.000115832
1	A1	Family	Pseudoalteromonadaceae	2	0.000231664
1	A1	Family	Phormidiaceae	1	0.000115832
1	A1	Family	Streptomycetaceae	1	0.000115832
1	A1	Family	Puniceicoccaceae	1	0.000115832
1	A1	Family	Lachnospiraceae	1	0.000115832
1	A1	Family	Ectothiorhodospiraceae	1	0.000115832
1	A1	Family	Moritellaceae	1	0.000115832
1	A1	Family	Deinococcaceae	1	0.000115832
1	A1	Family	Planctomycetaceae	1	0.000115832
1	A1	Family	Rivulariaceae	1	0.000115832
1	A1	Family	Verrucomicrobiaceae	1	0.000115832
1	A1	Family	Listeriaceae	1	0.000115832
1	A1	Family	Anaerobrancaceae	1	0.000115832
1	A1	Family	Actinomycetaceae	1	0.000115832
1	A1	Family	Borreliaceae	1	0.000115832
1	A1	Family	Hyphomonadaceae	1	0.000115832
1	A1	Genus	Unclassified	125019	14.4812
1	A1	Genus	Candidatus Amoebophilus	619080	71.7093
1	A1	Genus	Oxalobacter	35429	4.10381
1	A1	Genus	Chitinophaga	14206	1.64551
1	A1	Genus	Segetibacter	38890	4.50471
1	A1	Genus	Hydrogenophaga	1589	0.184057
1	A1	Genus	Acidovorax	3135	0.363133
1	A1	Genus	Rhodoferax	7321	0.848006
1	A1	Genus	Flavisolibacter	615	0.0712367
1	A1	Genus	Pedobacter	3232	0.374369
1	A1	Genus	Variovorax	65	0.00752908
1	A1	Genus	Vogesella	2726	0.315758
1	A1	Genus	Aquitalea	625	0.072395
1	A1	Genus	Curvibacter	137	0.015869
1	A1	Genus	Porphyromonas	33	0.00382246
1	A1	Genus	Chryseobacterium	133	0.0154057
1	A1	Genus	Brenneria	28	0.0032433
1	A1	Genus	Giesbergeria	2290	0.265255
1	A1	Genus	Chromobacterium	2577	0.298499
1	A1	Genus	Paucibacter	223	0.0258305
1	A1	Genus	Limnohabitans	662	0.0766808
1	A1	Genus	Sphingomonas	16	0.00185331
1	A1	Genus	Thiothrix	14	0.00162165
1	A1	Genus	Comamonas	327	0.0378771
1	A1	Genus	Limnobacter	677	0.0784183
1	A1	Genus	Marinospirillum	6	0.000694992
1	A1	Genus	Acetobacterium	1	0.000115832
1	A1	Genus	Niabella	38	0.00440162
1	A1	Genus	Sphingobacterium	622	0.0720475
1	A1	Genus	Sphingobium	10	0.00115832
1	A1	Genus	Pseudomonas	251	0.0290738
1	A1	Genus	Rickettsia	285	0.0330121
1	A1	Genus	Candidatus Phytoplasma	97	0.0112357
1	A1	Genus	Burkholderia	66	0.00764492
1	A1	Genus	Janthinobacterium	1064	0.123245
1	A1	Genus	Bradyrhizobium	24	0.00277997
1	A1	Genus	Lautropia	12	0.00138999
1	A1	Genus	Bifidobacterium	3	0.000347496
1	A1	Genus	Shewanella	132	0.0152898
1	A1	Genus	Tetragenococcus	3	0.000347496
1	A1	Genus	Neorickettsia	11	0.00127415
1	A1	Genus	Delftia	184	0.0213131
1	A1	Genus	Polaromonas	30	0.00347496
1	A1	Genus	Legionella	23	0.00266414
1	A1	Genus	Dechloromonas	8	0.000926656
1	A1	Genus	Macrococcus	46	0.00532827
1	A1	Genus	Methylobacterium	239	0.0276839
1	A1	Genus	Microvirus	23	0.00266414
1	A1	Genus	Helicobacter	16	0.00185331
1	A1	Genus	Pelomonas	94	0.0108882
1	A1	Genus	Litoricola	11	0.00127415
1	A1	Genus	Desulfurispirillum	4	0.000463328
1	A1	Genus	Candidatus Rhabdochlamydia	38	0.00440162
1	A1	Genus	Polynucleobacter	38	0.00440162
1	A1	Genus	Marinobacter	75	0.0086874
1	A1	Genus	Shinella	19	0.00220081
1	A1	Genus	Aminobacter	158	0.0183015
1	A1	Genus	Candidatus Protochlamydia	8	0.000926656
1	A1	Genus	Rhodobacter	5	0.00057916
1	A1	Genus	Desulfomonile	6	0.000694992
1	A1	Genus	Flammeovirga	5	0.00057916
1	A1	Genus	Tolumonas	1	0.000115832
1	A1	Genus	Olivibacter	25	0.0028958
1	A1	Genus	Salinicoccus	4	0.000463328
1	A1	Genus	Acinetobacter	16	0.00185331
1	A1	Genus	Hydrogenophilus	3	0.000347496
1	A1	Genus	Aquabacterium	33	0.00382246
1	A1	Genus	Pirellula	40	0.00463328
1	A1	Genus	Azoarcus	3	0.000347496
1	A1	Genus	Xanthobacter	1	0.000115832
1	A1	Genus	Runella	11	0.00127415
1	A1	Genus	Flavobacterium	12	0.00138999
1	A1	Genus	Roseospira	13	0.00150582
1	A1	Genus	Tepidimonas	9	0.00104249
1	A1	Genus	Candidatus Glomeribacter	7	0.000810824
1	A1	Genus	Hymenobacter	8	0.000926656
1	A1	Genus	Providencia	5	0.00057916
1	A1	Genus	Hyphomicrobium	108	0.0125099
1	A1	Genus	Agrobacterium	31	0.00359079
1	A1	Genus	Xenophilus	9	0.00104249
1	A1	Genus	Rhodothermus	1	0.000115832
1	A1	Genus	Francisella	5	0.00057916
1	A1	Genus	Leptothrix	15	0.00173748
1	A1	Genus	Ehrlichia	7	0.000810824
1	A1	Genus	Niastella	41	0.00474911
1	A1	Genus	Lewinella	9	0.00104249
1	A1	Genus	Gallionella	5	0.00057916
1	A1	Genus	Desulfonatronum	3	0.000347496
1	A1	Genus	Stenotrophomonas	2	0.000231664
1	A1	Genus	Psychrobacter	7	0.000810824
1	A1	Genus	Dyadobacter	4	0.000463328
1	A1	Genus	Desulfosarcina	5	0.00057916
1	A1	Genus	Oscillospira	1	0.000115832
1	A1	Genus	Gramella	1	0.000115832
1	A1	Genus	Caldicellulosiruptor	6	0.000694992
1	A1	Genus	Candidatus Blochmannia	3	0.000347496
1	A1	Genus	Denitratisoma	5	0.00057916
1	A1	Genus	Bdellovibrio	1	0.000115832
1	A1	Genus	Halomonas	1	0.000115832
1	A1	Genus	Mesorhizobium	1	0.000115832
1	A1	Genus	Pseudidiomarina	6	0.000694992
1	A1	Genus	Novosphingobium	2	0.000231664
1	A1	Genus	Herbaspirillum	18	0.00208498
1	A1	Genus	Luteibacter	7	0.000810824
1	A1	Genus	Methylotenera	2	0.000231664
1	A1	Genus	Ancylobacter	4	0.000463328
1	A1	Genus	Thiomonas	8	0.000926656
1	A1	Genus	Dokdonella	4	0.000463328
1	A1	Genus	Polaribacter	3	0.000347496
1	A1	Genus	Rhodospirillum	7	0.000810824
1	A1	Genus	Methylophaga	5	0.00057916
1	A1	Genus	Uliginosibacterium	1	0.000115832
1	A1	Genus	Glycomyces	3	0.000347496
1	A1	Genus	Virgibacillus	1	0.000115832
1	A1	Genus	Gluconobacter	4	0.000463328
1	A1	Genus	Aquimonas	1	0.000115832
1	A1	Genus	Campylobacter	2	0.000231664
1	A1	Genus	Asticcacaulis	1	0.000115832
1	A1	Genus	Bacillus	2	0.000231664
1	A1	Genus	Mycoplasma	2	0.000231664
1	A1	Genus	Desulfovibrio	2	0.000231664
1	A1	Genus	Chroococcus	1	0.000115832
1	A1	Genus	Candidatus Liberibacter	1	0.000115832
1	A1	Genus	Tenacibaculum	2	0.000231664
1	A1	Genus	Pasteurella	3	0.000347496
1	A1	Genus	Propionivibrio	11	0.00127415
1	A1	Genus	Waddlia	2	0.000231664
1	A1	Genus	Sulfurospirillum	1	0.000115832
1	A1	Genus	Deefgea	1	0.000115832
1	A1	Genus	Azospirillum	1	0.000115832
1	A1	Genus	Sinorhizobium	1	0.000115832
1	A1	Genus	Halanaerobium	1	0.000115832
1	A1	Genus	Ralstonia	1	0.000115832
1	A1	Genus	Clostridium	2	0.000231664
1	A1	Genus	Pseudoalteromonas	2	0.000231664
1	A1	Genus	Methyloversatilis	1	0.000115832
1	A1	Genus	Phormidium	1	0.000115832
1	A1	Genus	Phaeobacter	1	0.000115832
1	A1	Genus	Dysgonomonas	2	0.000231664
1	A1	Genus	Streptomyces	1	0.000115832
1	A1	Genus	Lysobacter	1	0.000115832
1	A1	Genus	Emticicia	1	0.000115832
1	A1	Genus	Coraliomargarita	1	0.000115832
1	A1	Genus	Zobellia	1	0.000115832
1	A1	Genus	Amaricoccus	1	0.000115832
1	A1	Genus	Blautia	1	0.000115832
1	A1	Genus	Ectothiorhodospira	1	0.000115832
1	A1	Genus	Bizionia	1	0.000115832
1	A1	Genus	Moritella	1	0.000115832
1	A1	Genus	Mitsuaria	1	0.000115832
1	A1	Genus	Deinococcus	1	0.000115832
1	A1	Genus	Planctomyces	1	0.000115832
1	A1	Genus	Calothrix	1	0.000115832
1	A1	Genus	Stenoxybacter	2	0.000231664
1	A1	Genus	Cycloclasticus	1	0.000115832
1	A1	Genus	Gillisia	1	0.000115832
1	A1	Genus	Collimonas	5	0.00057916
1	A1	Genus	Luteolibacter	1	0.000115832
1	A1	Genus	Alkaliphilus	1	0.000115832
1	A1	Genus	Methylobacillus	1	0.000115832
1	A1	Genus	Acholeplasma	1	0.000115832
1	A1	Genus	Brochothrix	1	0.000115832
1	A1	Genus	Anaerobranca	1	0.000115832
1	A1	Genus	Roseomonas	1	0.000115832
1	A1	Genus	Borrelia	1	0.000115832
1	A1	Genus	Maricaulis	1	0.000115832
1	A1	Genus	Blastochloris	1	0.000115832
1	A1	Species	Unclassified	142496	16.5056
1	A1	Species	Candidatus Amoebophilus asiaticus	619080	71.7093
1	A1	Species	Oxalobacter vibrioformis	35429	4.10381
1	A1	Species	Chitinophaga soli	14204	1.64528
1	A1	Species	Segetibacter aerophilus	38890	4.50471
1	A1	Species	Hydrogenophaga defluvii	1280	0.148265
1	A1	Species	Acidovorax wohlfahrtii	2651	0.307071
1	A1	Species	Rhodoferax antarcticus	3343	0.387226
1	A1	Species	Flavisolibacter ginsengisoli	615	0.0712367
1	A1	Species	Variovorax boronicumulans	49	0.00567577
1	A1	Species	Aquitalea denitrificans	624	0.0722792
1	A1	Species	Curvibacter gracilis	136	0.0157532
1	A1	Species	Rhodoferax ferrireducens	199	0.0230506
1	A1	Species	Porphyromonas canis	33	0.00382246
1	A1	Species	Chryseobacterium indologenes	101	0.011699
1	A1	Species	Acidovorax anthurii	51	0.00590743
1	A1	Species	Comamonas nitrativorans	61	0.00706575
1	A1	Species	Limnobacter litoralis	14	0.00162165
1	A1	Species	Niabella aurantiaca	7	0.000810824
1	A1	Species	Niabella soli	31	0.00359079
1	A1	Species	Sphingobacterium shayense	622	0.0720475
1	A1	Species	Sphingobium abikonense	7	0.000810824
1	A1	Species	Burkholderia ubonensis	35	0.00405412
1	A1	Species	Limnobacter thiooxidans	95	0.011004
1	A1	Species	Janthinobacterium agaricidamnosum	1064	0.123245
1	A1	Species	Lautropia mirabilis	12	0.00138999
1	A1	Species	Acidovorax facilis	414	0.0479545
1	A1	Species	Tetragenococcus doogicus	3	0.000347496
1	A1	Species	Neorickettsia helminthoeca	11	0.00127415
1	A1	Species	Delftia lacustris	184	0.0213131
1	A1	Species	Legionella shakespearei	4	0.000463328
1	A1	Species	Vogesella perlucida	369	0.042742
1	A1	Species	Dechloromonas hortensis	8	0.000926656
1	A1	Species	Comamonas kerstersii	74	0.00857157
1	A1	Species	Methylobacterium marchantiae	151	0.0174906
1	A1	Species	Pseudomonas moraviensis	22	0.0025483
1	A1	Species	Pseudomonas fluorescens	1	0.000115832
1	A1	Species	Microvirus Enterobacteria phage PhiX174	23	0.00266414
1	A1	Species	Giesbergeria voronezhensis	8	0.000926656
1	A1	Species	Pseudomonas mendocina	20	0.00231664
1	A1	Species	Pelomonas saccharophila	90	0.0104249
1	A1	Species	Desulfurispirillum alkaliphilum	4	0.000463328
1	A1	Species	Methylobacterium goesingense	52	0.00602327
1	A1	Species	Marinobacter arcticus	74	0.00857157
1	A1	Species	Hydrogenophaga pseudoflava	130	0.0150582
1	A1	Species	Rhodobacter apigmentum	5	0.00057916
1	A1	Species	Desulfomonile tiedjei	6	0.000694992
1	A1	Species	Flammeovirga pacifica	5	0.00057916
1	A1	Species	Tolumonas auensis	1	0.000115832
1	A1	Species	Aminobacter aganoensis	3	0.000347496
1	A1	Species	Salinicoccus iranensis	4	0.000463328
1	A1	Species	Acinetobacter tjernbergiae	1	0.000115832
1	A1	Species	Acinetobacter guillouiae	10	0.00115832
1	A1	Species	Pedobacter koreensis	14	0.00162165
1	A1	Species	Pirellula staleyi	38	0.00440162
1	A1	Species	Xanthobacter polyaromaticivorans	1	0.000115832
1	A1	Species	Runella limosa	11	0.00127415
1	A1	Species	Pseudomonas panipatensis	4	0.000463328
1	A1	Species	Burkholderia phenoliruptrix	9	0.00104249
1	A1	Species	Hyphomicrobium aestuarii	6	0.000694992
1	A1	Species	Hyphomicrobium vulgare	52	0.00602327
1	A1	Species	Rhodothermus clarus	1	0.000115832
1	A1	Species	Variovorax dokdonensis	10	0.00115832
1	A1	Species	Comamonas composti	14	0.00162165
1	A1	Species	Francisella hispaniensis	5	0.00057916
1	A1	Species	Leptothrix discophora	15	0.00173748
1	A1	Species	Ehrlichia ovina	7	0.000810824
1	A1	Species	Niastella koreensis	41	0.00474911
1	A1	Species	Acinetobacter gerneri	2	0.000231664
1	A1	Species	Chromobacterium subtsugae	3	0.000347496
1	A1	Species	Pseudomonas teessidea	3	0.000347496
1	A1	Species	Pedobacter himalayensis	2	0.000231664
1	A1	Species	Gallionella ferruginea	5	0.00057916
1	A1	Species	Desulfonatronum thiosulfatophilum	3	0.000347496
1	A1	Species	Lewinella lutea	1	0.000115832
1	A1	Species	Pedobacter cryoconitis	3	0.000347496
1	A1	Species	Candidatus Blochmannia castaneus	3	0.000347496
1	A1	Species	Denitratisoma oestradiolicum	5	0.00057916
1	A1	Species	Pedobacter daejeonensis	7	0.000810824
1	A1	Species	Aminobacter aminovorans	7	0.000810824
1	A1	Species	Bdellovibrio bacteriovorus	1	0.000115832
1	A1	Species	Chromobacterium haemolyticum	17	0.00196914
1	A1	Species	Mesorhizobium camelthorni	1	0.000115832
1	A1	Species	Legionella cherrii	1	0.000115832
1	A1	Species	Novosphingobium acidiphilum	1	0.000115832
1	A1	Species	Herbaspirillum magnetovibrio	6	0.000694992
1	A1	Species	Luteibacter anthropi	7	0.000810824
1	A1	Species	Variovorax soli	3	0.000347496
1	A1	Species	Methylotenera versatilis	2	0.000231664
1	A1	Species	Thiomonas perometabolis	1	0.000115832
1	A1	Species	Dokdonella fugitiva	4	0.000463328
1	A1	Species	Variovorax paradoxus	1	0.000115832
1	A1	Species	Rickettsia monacensis	6	0.000694992
1	A1	Species	Burkholderia seminalis	5	0.00057916
1	A1	Species	Agrobacterium tumefaciens	21	0.00243247
1	A1	Species	Herbaspirillum aquaticum	4	0.000463328
1	A1	Species	Polaribacter butkevichii	3	0.000347496
1	A1	Species	Limnohabitans parvus	12	0.00138999
1	A1	Species	Psychrobacter halophilus	1	0.000115832
1	A1	Species	Hydrogenophaga bisanensis	6	0.000694992
1	A1	Species	Uliginosibacterium gangwonense	1	0.000115832
1	A1	Species	Chitinophaga ginsengisoli	1	0.000115832
1	A1	Species	Herbaspirillum chlorophenolicum	4	0.000463328
1	A1	Species	Shinella granuli	4	0.000463328
1	A1	Species	Virgibacillus salexigens	1	0.000115832
1	A1	Species	Aquimonas voraii	1	0.000115832
1	A1	Species	Campylobacter faecalis	2	0.000231664
1	A1	Species	Pedobacter insulae	5	0.00057916
1	A1	Species	Thiomonas thermosulfata	4	0.000463328
1	A1	Species	Hydrogenophaga palleronii	1	0.000115832
1	A1	Species	Chromobacterium piscinae	3	0.000347496
1	A1	Species	Mycoplasma timone	2	0.000231664
1	A1	Species	Desulfovibrio psychrotolerans	1	0.000115832
1	A1	Species	Chroococcus minutus	1	0.000115832
1	A1	Species	Herbaspirillum frisingense	2	0.000231664
1	A1	Species	Bacillus pseudofirmus	1	0.000115832
1	A1	Species	Propionivibrio dicarboxylicus	10	0.00115832
1	A1	Species	Pseudomonas parafulva	4	0.000463328
1	A1	Species	Polaromonas vacuolata	2	0.000231664
1	A1	Species	Pelomonas puraquae	4	0.000463328
1	A1	Species	Lewinella marina	5	0.00057916
1	A1	Species	Methylobacterium radiotolerans	2	0.000231664
1	A1	Species	Shinella fusca	6	0.000694992
1	A1	Species	Olivibacter terrae	1	0.000115832
1	A1	Species	Deefgea rivuli	1	0.000115832
1	A1	Species	Pedobacter agri	2	0.000231664
1	A1	Species	Sinorhizobium medicae	1	0.000115832
1	A1	Species	Legionella taurinensis	1	0.000115832
1	A1	Species	Candidatus Rhabdochlamydia crassificans	1	0.000115832
1	A1	Species	Pedobacter hartonius	2	0.000231664
1	A1	Species	Ralstonia detusculanense	1	0.000115832
1	A1	Species	Chryseobacterium oranimense	1	0.000115832
1	A1	Species	Methyloversatilis universalis	1	0.000115832
1	A1	Species	Acidovorax delafieldii	2	0.000231664
1	A1	Species	Pedobacter suwonensis	2	0.000231664
1	A1	Species	Dysgonomonas wimpennyi	2	0.000231664
1	A1	Species	Streptomyces lazureus	1	0.000115832
1	A1	Species	Lysobacter deserti	1	0.000115832
1	A1	Species	Emticicia oligotrophica	1	0.000115832
1	A1	Species	Pseudomonas cinnamophila	1	0.000115832
1	A1	Species	Coraliomargarita akajimensis	1	0.000115832
1	A1	Species	Pseudomonas coronafaciens	1	0.000115832
1	A1	Species	Pedobacter kwangyangensis	3	0.000347496
1	A1	Species	Zobellia laminariae	1	0.000115832
1	A1	Species	Amaricoccus kaplicensis	1	0.000115832
1	A1	Species	Agrobacterium larrymoorei	1	0.000115832
1	A1	Species	Novosphingobium hassiacum	1	0.000115832
1	A1	Species	Tepidimonas thermarum	3	0.000347496
1	A1	Species	Rhodoferax fermentans	1	0.000115832
1	A1	Species	Ectothiorhodospira haloalkaliphila	1	0.000115832
1	A1	Species	Pseudomonas brenneri	1	0.000115832
1	A1	Species	Bizionia saleffrena	1	0.000115832
1	A1	Species	Moritella japonica	1	0.000115832
1	A1	Species	Mitsuaria chitosanitabida	1	0.000115832
1	A1	Species	Pedobacter africanus	1	0.000115832
1	A1	Species	Pseudomonas corrugata	1	0.000115832
1	A1	Species	Sphingomonas sanxanigenens	1	0.000115832
1	A1	Species	Planctomyces limnophilus	1	0.000115832
1	A1	Species	Calothrix parietina	1	0.000115832
1	A1	Species	Propionivibrio pelophilus	1	0.000115832
1	A1	Species	Cycloclasticus oligotrophus	1	0.000115832
1	A1	Species	Collimonas pratensis	5	0.00057916
1	A1	Species	Luteolibacter algae	1	0.000115832
1	A1	Species	Alkaliphilus crotonatoxidans	1	0.000115832
1	A1	Species	Shewanella pneumatophori	3	0.000347496
1	A1	Species	Methylobacillus glycogenes	1	0.000115832
1	A1	Species	Gluconobacter kondonii	1	0.000115832
1	A1	Species	Vogesella indigofera	1	0.000115832
1	A1	Species	Comamonas odontotermitis	1	0.000115832
1	A1	Species	Acholeplasma cavigenitalium	1	0.000115832
1	A1	Species	Hyphomicrobium sulfonivorans	1	0.000115832
1	A1	Species	Chryseobacterium joostei	1	0.000115832
1	A1	Species	Anaerobranca zavarzinii	1	0.000115832
1	A1	Species	Chryseobacterium aquifrigidense	1	0.000115832
1	A1	Species	Roseomonas massiliensis	1	0.000115832
1	A1	Species	Pseudomonas pseudoalcaligenes	1	0.000115832
1	A1	Species	Maricaulis indicus	1	0.000115832
1	A1	Species	Pseudomonas composti	1	0.000115832
1	A1	Species	Blastochloris gulmargensis	1	0.000115832
2	A2	Kingdom	Unclassified	33188	4.18753
2	A2	Kingdom	Bacteria	759336	95.81
2	A2	Kingdom	Viruses	20	0.00252352
2	A2	Phylum	Unclassified	34494	4.35231
2	A2	Phylum	Bacteroidetes	596475	75.2608
2	A2	Phylum	Proteobacteria	160770	20.2853
2	A2	Phylum	Firmicutes	271	0.0341937
2	A2	Phylum	Fusobacteria	58	0.00731821
2	A2	Phylum	Tenericutes	115	0.0145102
2	A2	Phylum	Planctomycetes	256	0.032301
2	A2	Phylum	DNA	20	0.00252352
2	A2	Phylum	Chloroflexi	2	0.000252352
2	A2	Phylum	Synergistetes	3	0.000378528
2	A2	Phylum	Verrucomicrobia	10	0.00126176
2	A2	Phylum	Chlamydiae	9	0.00113558
2	A2	Phylum	Actinobacteria	46	0.00580409
2	A2	Phylum	Cyanobacteria	7	0.000883232
2	A2	Phylum	Chlorobi	1	0.000126176
2	A2	Phylum	Chrysiogenetes	3	0.000378528
2	A2	Phylum	Thermi	2	0.000252352
2	A2	Phylum	Spirochaetes	1	0.000126176
2	A2	Phylum	Nitrospirae	1	0.000126176
2	A2	Class	Unclassified	35145	4.43445
2	A2	Class	Sphingobacteriia	595857	75.1828
2	A2	Class	Betaproteobacteria	158435	19.9907
2	A2	Class	Bacilli	158	0.0199358
2	A2	Class	Gammaproteobacteria	920	0.116082
2	A2	Class	Alphaproteobacteria	870	0.109773
2	A2	Class	Flavobacteriia	427	0.0538771
2	A2	Class	Clostridia	88	0.0111035
2	A2	Class	Fusobacteria	58	0.00731821
2	A2	Class	Mollicutes	115	0.0145102
2	A2	Class	Planctomycetia	256	0.032301
2	A2	Class	Group II	20	0.00252352
2	A2	Class	Anaerolineae	2	0.000252352
2	A2	Class	Synergistia	3	0.000378528
2	A2	Class	Bacteroidia	59	0.00744438
2	A2	Class	Epsilonproteobacteria	32	0.00403763
2	A2	Class	Verrucomicrobiae	6	0.000757056
2	A2	Class	Deltaproteobacteria	20	0.00252352
2	A2	Class	Chlamydiia	9	0.00113558
2	A2	Class	Actinobacteria	45	0.00567792
2	A2	Class	Nostocophycideae	5	0.00063088
2	A2	Class	Chlorobia	1	0.000126176
2	A2	Class	Chrysiogenetes	3	0.000378528
2	A2	Class	Deinococci	2	0.000252352
2	A2	Class	Spartobacteria	2	0.000252352
2	A2	Class	Opitutae	2	0.000252352
2	A2	Class	Oscillatoriophycideae	1	0.000126176
2	A2	Class	Erysipelotrichi	1	0.000126176
2	A2	Class	Spirochaetes	1	0.000126176
2	A2	Class	Nitrospira	1	0.000126176
2	A2	Order	Unclassified	37029	4.67217
2	A2	Order	Sphingobacteriales	595857	75.1828
2	A2	Order	Neisseriales	5144	0.649049
2	A2	Order	Burkholderiales	151485	19.1138
2	A2	Order	Bacillales	118	0.0148888
2	A2	Order	Oceanospirillales	38	0.00479469
2	A2	Order	Rickettsiales	356	0.0449186
2	A2	Order	Flavobacteriales	427	0.0538771
2	A2	Order	Rhizobiales	390	0.0492086
2	A2	Order	Clostridiales	78	0.00984173
2	A2	Order	Rhodocyclales	30	0.00378528
2	A2	Order	Alteromonadales	267	0.033689
2	A2	Order	Pseudomonadales	199	0.025109
2	A2	Order	Fusobacteriales	58	0.00731821
2	A2	Order	Thiotrichales	65	0.00820144
2	A2	Order	Methylococcales	2	0.000252352
2	A2	Order	Legionellales	54	0.0068135
2	A2	Order	Acholeplasmatales	103	0.0129961
2	A2	Order	Enterobacteriales	131	0.016529
2	A2	Order	Gemmatales	253	0.0319225
2	A2	Order	Rhodospirillales	52	0.00656115
2	A2	Order	(Microviridae)	20	0.00252352
2	A2	Order	Sphingomonadales	37	0.00466851
2	A2	Order	Anaerolineales	1	0.000126176
2	A2	Order	Xanthomonadales	21	0.0026497
2	A2	Order	Synergistales	3	0.000378528
2	A2	Order	Pasteurellales	2	0.000252352
2	A2	Order	Bacteroidales	59	0.00744438
2	A2	Order	Campylobacterales	32	0.00403763
2	A2	Order	Verrucomicrobiales	6	0.000757056
2	A2	Order	Syntrophobacterales	9	0.00113558
2	A2	Order	Chlamydiales	9	0.00113558
2	A2	Order	Mycoplasmatales	10	0.00126176
2	A2	Order	Actinomycetales	40	0.00504704
2	A2	Order	Stigonematales	3	0.000378528
2	A2	Order	Lactobacillales	39	0.00492086
2	A2	Order	Methylophilales	9	0.00113558
2	A2	Order	Aeromonadales	15	0.00189264
2	A2	Order	Chlorobiales	1	0.000126176
2	A2	Order	Rhodobacterales	15	0.00189264
2	A2	Order	Nostocales	2	0.000252352
2	A2	Order	Pirellulales	1	0.000126176
2	A2	Order	Chrysiogenales	3	0.000378528
2	A2	Order	Gallionellales	13	0.00164029
2	A2	Order	Hydrogenophilales	3	0.000378528
2	A2	Order	Bifidobacteriales	5	0.00063088
2	A2	Order	Chromatiales	14	0.00176646
2	A2	Order	Desulfovibrionales	11	0.00138794
2	A2	Order	Entomoplasmatales	2	0.000252352
2	A2	Order	Thermales	2	0.000252352
2	A2	Order	Chthoniobacterales	2	0.000252352
2	A2	Order	Thermoanaerobacterales	6	0.000757056
2	A2	Order	Planctomycetales	2	0.000252352
2	A2	Order	Pelagicoccales	2	0.000252352
2	A2	Order	Natranaerobiales	1	0.000126176
2	A2	Order	Chroococcales	1	0.000126176
2	A2	Order	Erysipelotrichales	1	0.000126176
2	A2	Order	Borreliales	1	0.000126176
2	A2	Order	Nitrospirales	1	0.000126176
2	A2	Order	Caulobacterales	1	0.000126176
2	A2	Order	Vibrionales	1	0.000126176
2	A2	Order	Thiohalorhabdales	1	0.000126176
2	A2	Order	Caldilineales	1	0.000126176
2	A2	Family	Unclassified	50324	6.34968
2	A2	Family	Amoebophilaceae	531663	67.0831
2	A2	Family	Neisseriaceae	5144	0.649049
2	A2	Family	Comamonadaceae	102668	12.9542
2	A2	Family	Chitinophagaceae	47929	6.04749
2	A2	Family	Oxalobacteraceae	48382	6.10464
2	A2	Family	Staphylococcaceae	107	0.0135008
2	A2	Family	Halomonadaceae	11	0.00138794
2	A2	Family	Rickettsiaceae	335	0.0422689
2	A2	Family	Sphingobacteriaceae	3310	0.417642
2	A2	Family	Flavobacteriaceae	427	0.0538771
2	A2	Family	Rhizobiaceae	139	0.0175385
2	A2	Family	Ruminococcaceae	5	0.00063088
2	A2	Family	Rhodocyclaceae	30	0.00378528
2	A2	Family	Shewanellaceae	190	0.0239734
2	A2	Family	Pseudomonadaceae	190	0.0239734
2	A2	Family	Fusobacteriaceae	58	0.00731821
2	A2	Family	Flexibacteraceae	22	0.00277587
2	A2	Family	Methylococcaceae	2	0.000252352
2	A2	Family	Clostridiaceae	26	0.00328057
2	A2	Family	Legionellaceae	49	0.00618262
2	A2	Family	Alteromonadaceae	58	0.00731821
2	A2	Family	Acholeplasmataceae	103	0.0129961
2	A2	Family	Anaplasmataceae	21	0.0026497
2	A2	Family	Methylobacteriaceae	235	0.0296513
2	A2	Family	Thiotrichaceae	36	0.00454233
2	A2	Family	Enterobacteriaceae	131	0.016529
2	A2	Family	Gemmataceae	252	0.0317963
2	A2	Family	Burkholderiaceae	122	0.0153935
2	A2	Family	Acetobacteraceae	17	0.00214499
2	A2	Family	Microviridae	20	0.00252352
2	A2	Family	Sphingomonadaceae	37	0.00466851
2	A2	Family	Veillonellaceae	3	0.000378528
2	A2	Family	Anaerolinaceae	1	0.000126176
2	A2	Family	Xanthomonadaceae	20	0.00252352
2	A2	Family	Bacillaceae	5	0.00063088
2	A2	Family	Rhodospirillaceae	35	0.00441616
2	A2	Family	Pasteurellaceae	2	0.000252352
2	A2	Family	Porphyromonadaceae	58	0.00731821
2	A2	Family	Helicobacteraceae	24	0.00302822
2	A2	Family	Aminiphilaceae	2	0.000252352
2	A2	Family	Verrucomicrobiaceae	6	0.000757056
2	A2	Family	Desulfobacteraceae	6	0.000757056
2	A2	Family	Piscirickettsiaceae	13	0.00164029
2	A2	Family	Rhabdochlamydiaceae	5	0.00063088
2	A2	Family	Mycoplasmataceae	10	0.00126176
2	A2	Family	Lachnospiraceae	15	0.00189264
2	A2	Family	Actinomycetaceae	18	0.00227117
2	A2	Family	Rivulariaceae	3	0.000378528
2	A2	Family	Pseudoalteromonadaceae	3	0.000378528
2	A2	Family	Litoricolaceae	20	0.00252352
2	A2	Family	Phyllobacteriaceae	8	0.00100941
2	A2	Family	Streptomycetaceae	4	0.000504704
2	A2	Family	Enterococcaceae	26	0.00328057
2	A2	Family	Saprospiraceae	16	0.00201882
2	A2	Family	Methylophilaceae	9	0.00113558
2	A2	Family	Bradyrhizobiaceae	1	0.000126176
2	A2	Family	Eubacteriaceae	2	0.000252352
2	A2	Family	Aeromonadaceae	15	0.00189264
2	A2	Family	Alcaligenaceae	10	0.00126176
2	A2	Family	Psychromonadaceae	1	0.000126176
2	A2	Family	Francisellaceae	5	0.00063088
2	A2	Family	Chlorobiaceae	1	0.000126176
2	A2	Family	Hyphomicrobiaceae	2	0.000252352
2	A2	Family	Brevibacteriaceae	2	0.000252352
2	A2	Family	Rhodobacteraceae	15	0.00189264
2	A2	Family	Nostocaceae	2	0.000252352
2	A2	Family	Pirellulaceae	1	0.000126176
2	A2	Family	Chrysiogenaceae	3	0.000378528
2	A2	Family	Gallionellaceae	13	0.00164029
2	A2	Family	Oceanospirillaceae	7	0.000883232
2	A2	Family	Hydrogenophilaceae	3	0.000378528
2	A2	Family	Rhodothermaceae	3	0.000378528
2	A2	Family	Idiomarinaceae	9	0.00113558
2	A2	Family	Bifidobacteriaceae	5	0.00063088
2	A2	Family	Chromatiaceae	12	0.00151411
2	A2	Family	Moraxellaceae	9	0.00113558
2	A2	Family	Desulfovibrionaceae	6	0.000757056
2	A2	Family	Glycomycetaceae	3	0.000378528
2	A2	Family	Campylobacteraceae	8	0.00100941
2	A2	Family	Entomoplasmataceae	2	0.000252352
2	A2	Family	Thermaceae	2	0.000252352
2	A2	Family	Desulfonatronumaceae	5	0.00063088
2	A2	Family	Chthoniobacteraceae	2	0.000252352
2	A2	Family	Flammeovirgaceae	2	0.000252352
2	A2	Family	Microbacteriaceae	3	0.000378528
2	A2	Family	Kineosporiaceae	1	0.000126176
2	A2	Family	Caldicellulosiruptoraceae	6	0.000757056
2	A2	Family	Ectothiorhodospiraceae	2	0.000252352
2	A2	Family	Planctomycetaceae	2	0.000252352
2	A2	Family	Pelagicoccaceae	2	0.000252352
2	A2	Family	Micromonosporaceae	1	0.000126176
2	A2	Family	Planococcaceae	1	0.000126176
2	A2	Family	Anaerobrancaceae	1	0.000126176
2	A2	Family	Syntrophaceae	3	0.000378528
2	A2	Family	Propionibacteriaceae	1	0.000126176
2	A2	Family	Erysipelotrichaceae	1	0.000126176
2	A2	Family	Bacteroidaceae	1	0.000126176
2	A2	Family	Leuconostocaceae	1	0.000126176
2	A2	Family	Peptococcaceae	1	0.000126176
2	A2	Family	Borreliaceae	1	0.000126176
2	A2	Family	Sinobacteraceae	1	0.000126176
2	A2	Family	Paenibacillaceae	1	0.000126176
2	A2	Family	Thermodesulfovibrionaceae	1	0.000126176
2	A2	Family	Caulobacteraceae	1	0.000126176
2	A2	Family	Vibrionaceae	1	0.000126176
2	A2	Family	Thiohalorhabdaceae	1	0.000126176
2	A2	Family	Micrococcaceae	1	0.000126176
2	A2	Family	Isosphaeraceae	1	0.000126176
2	A2	Family	Parachlamydiaceae	1	0.000126176
2	A2	Family	Caldilineaceae	1	0.000126176
2	A2	Genus	Unclassified	142051	17.9234
2	A2	Genus	Candidatus Amoebophilus	531663	67.0831
2	A2	Genus	Chromobacterium	1927	0.243141
2	A2	Genus	Acidovorax	3424	0.432026
2	A2	Genus	Segetibacter	32252	4.06943
2	A2	Genus	Limnobacter	651	0.0821406
2	A2	Genus	Chitinophaga	11739	1.48118
2	A2	Genus	Janthinobacterium	1124	0.141822
2	A2	Genus	Hydrogenophaga	1749	0.220682
2	A2	Genus	Aquitalea	676	0.0852949
2	A2	Genus	Oxalobacter	46717	5.89456
2	A2	Genus	Vogesella	2398	0.30257
2	A2	Genus	Macrococcus	96	0.0121129
2	A2	Genus	Rickettsia	324	0.040881
2	A2	Genus	Sphingobacterium	524	0.0661162
2	A2	Genus	Rhodoferax	5132	0.647535
2	A2	Genus	Flavisolibacter	443	0.0558959
2	A2	Genus	Pedobacter	2749	0.346858
2	A2	Genus	Giesbergeria	2334	0.294495
2	A2	Genus	Variovorax	137	0.0172861
2	A2	Genus	Limnohabitans	555	0.0700277
2	A2	Genus	Flavobacterium	11	0.00138794
2	A2	Genus	Sinorhizobium	4	0.000504704
2	A2	Genus	Shinella	109	0.0137532
2	A2	Genus	Oscillospira	2	0.000252352
2	A2	Genus	Dechloromonas	10	0.00126176
2	A2	Genus	Shewanella	190	0.0239734
2	A2	Genus	Pseudomonas	190	0.0239734
2	A2	Genus	Chryseobacterium	369	0.0465589
2	A2	Genus	Fusobacterium	2	0.000252352
2	A2	Genus	Curvibacter	176	0.022207
2	A2	Genus	Paucibacter	121	0.0152673
2	A2	Genus	Comamonas	293	0.0369696
2	A2	Genus	Polynucleobacter	63	0.00794909
2	A2	Genus	Dyadobacter	4	0.000504704
2	A2	Genus	Herbaspirillum	18	0.00227117
2	A2	Genus	Methylocaldum	2	0.000252352
2	A2	Genus	Denitratisoma	3	0.000378528
2	A2	Genus	Niastella	35	0.00441616
2	A2	Genus	Niabella	29	0.0036591
2	A2	Genus	Clostridium	12	0.00151411
2	A2	Genus	Legionella	49	0.00618262
2	A2	Genus	Xenophilus	114	0.0143841
2	A2	Genus	Marinobacter	56	0.00706585
2	A2	Genus	Delftia	294	0.0370957
2	A2	Genus	Candidatus Phytoplasma	102	0.0128699
2	A2	Genus	Neorickettsia	14	0.00176646
2	A2	Genus	Methylobacterium	235	0.0296513
2	A2	Genus	Thiothrix	36	0.00454233
2	A2	Genus	Wolbachia	11	0.00138794
2	A2	Genus	Plesiomonas	37	0.00466851
2	A2	Genus	Gemmata	252	0.0317963
2	A2	Genus	Aquabacterium	71	0.00895849
2	A2	Genus	Gluconobacter	11	0.00138794
2	A2	Genus	Microvirus	20	0.00252352
2	A2	Genus	Sphingomonas	21	0.0026497
2	A2	Genus	Polaromonas	39	0.00492086
2	A2	Genus	Megasphaera	3	0.000378528
2	A2	Genus	Agrobacterium	21	0.0026497
2	A2	Genus	Thiomonas	11	0.00138794
2	A2	Genus	Methyloversatilis	1	0.000126176
2	A2	Genus	Hymenobacter	7	0.000883232
2	A2	Genus	Hydrogenophilus	4	0.000504704
2	A2	Genus	Ehrlichia	7	0.000883232
2	A2	Genus	Stenoxybacter	6	0.000757056
2	A2	Genus	Stenotrophomonas	4	0.000504704
2	A2	Genus	Brenneria	36	0.00454233
2	A2	Genus	Propionigenium	40	0.00504704
2	A2	Genus	Bacillus	4	0.000504704
2	A2	Genus	Rhodospirillum	25	0.0031544
2	A2	Genus	Pasteurella	1	0.000126176
2	A2	Genus	Porphyromonas	54	0.0068135
2	A2	Genus	Zymomonas	3	0.000378528
2	A2	Genus	Sphingobium	7	0.000883232
2	A2	Genus	Helicobacter	24	0.00302822
2	A2	Genus	Aminiphilus	2	0.000252352
2	A2	Genus	Rubritalea	2	0.000252352
2	A2	Genus	Deefgea	8	0.00100941
2	A2	Genus	Desulfosarcina	5	0.00063088
2	A2	Genus	Dysgonomonas	4	0.000504704
2	A2	Genus	Cycloclasticus	10	0.00126176
2	A2	Genus	Burkholderia	83	0.0104726
2	A2	Genus	Candidatus Rhabdochlamydia	5	0.00063088
2	A2	Genus	Leptothrix	22	0.00277587
2	A2	Genus	Mycoplasma	10	0.00126176
2	A2	Genus	Candidatus Glomeribacter	12	0.00151411
2	A2	Genus	Tepidimonas	11	0.00138794
2	A2	Genus	Salinicoccus	6	0.000757056
2	A2	Genus	Lautropia	17	0.00214499
2	A2	Genus	Erwinia	2	0.000252352
2	A2	Genus	Polaribacter	2	0.000252352
2	A2	Genus	Blautia	10	0.00126176
2	A2	Genus	Calothrix	3	0.000378528
2	A2	Genus	Pseudoalteromonas	3	0.000378528
2	A2	Genus	Litoricola	20	0.00252352
2	A2	Genus	Alkaliphilus	1	0.000126176
2	A2	Genus	Mesorhizobium	7	0.000883232
2	A2	Genus	Ramlibacter	8	0.00100941
2	A2	Genus	Streptomyces	4	0.000504704
2	A2	Genus	Tetragenococcus	24	0.00302822
2	A2	Genus	Lewinella	16	0.00201882
2	A2	Genus	Methylobacillus	8	0.00100941
2	A2	Genus	Bradyrhizobium	1	0.000126176
2	A2	Genus	Acetobacterium	2	0.000252352
2	A2	Genus	Halomonas	6	0.000757056
2	A2	Genus	Tolumonas	15	0.00189264
2	A2	Genus	Luteibacter	2	0.000252352
2	A2	Genus	Enterobacter	1	0.000126176
2	A2	Genus	Psychromonas	1	0.000126176
2	A2	Genus	Francisella	5	0.00063088
2	A2	Genus	Chlorobaculum	1	0.000126176
2	A2	Genus	Hyphomicrobium	2	0.000252352
2	A2	Genus	Kushneria	1	0.000126176
2	A2	Genus	Brevibacterium	2	0.000252352
2	A2	Genus	Olivibacter	19	0.00239734
2	A2	Genus	Klebsiella	2	0.000252352
2	A2	Genus	Roseomonas	1	0.000126176
2	A2	Genus	Amaricoccus	4	0.000504704
2	A2	Genus	Yersinia	7	0.000883232
2	A2	Genus	Glaciecola	1	0.000126176
2	A2	Genus	Pirellula	1	0.000126176
2	A2	Genus	Desulfurispirillum	3	0.000378528
2	A2	Genus	Gallionella	13	0.00164029
2	A2	Genus	Candidatus Blochmannia	7	0.000883232
2	A2	Genus	Oceanospirillum	1	0.000126176
2	A2	Genus	Providencia	7	0.000883232
2	A2	Genus	Serratia	8	0.00100941
2	A2	Genus	Thiobacillus	3	0.000378528
2	A2	Genus	Rhodothermus	3	0.000378528
2	A2	Genus	Pseudidiomarina	9	0.00113558
2	A2	Genus	Bifidobacterium	5	0.00063088
2	A2	Genus	Cetobacterium	6	0.000757056
2	A2	Genus	Actinomyces	4	0.000504704
2	A2	Genus	Rhodobacter	9	0.00113558
2	A2	Genus	Runella	7	0.000883232
2	A2	Genus	Acinetobacter	2	0.000252352
2	A2	Genus	Desulfovibrio	6	0.000757056
2	A2	Genus	Arcanobacterium	1	0.000126176
2	A2	Genus	Glycomyces	3	0.000378528
2	A2	Genus	Johnsonella	2	0.000252352
2	A2	Genus	Campylobacter	6	0.000757056
2	A2	Genus	Luteolibacter	4	0.000504704
2	A2	Genus	Mesoplasma	2	0.000252352
2	A2	Genus	Thermus	2	0.000252352
2	A2	Genus	Desulfonatronum	5	0.00063088
2	A2	Genus	Chthoniobacter	2	0.000252352
2	A2	Genus	Moraxella	1	0.000126176
2	A2	Genus	Psychrobacter	6	0.000757056
2	A2	Genus	Marinospirillum	3	0.000378528
2	A2	Genus	Flammeovirga	2	0.000252352
2	A2	Genus	Dokdonella	3	0.000378528
2	A2	Genus	Alishewanella	1	0.000126176
2	A2	Genus	Aminobacter	1	0.000126176
2	A2	Genus	Kineosporia	1	0.000126176
2	A2	Genus	Aquimonas	3	0.000378528
2	A2	Genus	Achromobacter	3	0.000378528
2	A2	Genus	Thauera	3	0.000378528
2	A2	Genus	Caldicellulosiruptor	6	0.000757056
2	A2	Genus	Ectothiorhodospira	1	0.000126176
2	A2	Genus	Peptoniphilus	2	0.000252352
2	A2	Genus	Azohydromonas	1	0.000126176
2	A2	Genus	Planctomyces	2	0.000252352
2	A2	Genus	Halochromatium	1	0.000126176
2	A2	Genus	Azospirillum	2	0.000252352
2	A2	Genus	Arenimonas	1	0.000126176
2	A2	Genus	Anaerotruncus	3	0.000378528
2	A2	Genus	Microbulbifer	1	0.000126176
2	A2	Genus	Enterococcus	2	0.000252352
2	A2	Genus	Thermomonas	2	0.000252352
2	A2	Genus	Roseospira	1	0.000126176
2	A2	Genus	Propionivibrio	4	0.000504704
2	A2	Genus	Pelagicoccus	2	0.000252352
2	A2	Genus	Chromatium	2	0.000252352
2	A2	Genus	Micromonospora	1	0.000126176
2	A2	Genus	Viridibacillus	1	0.000126176
2	A2	Genus	Methylophaga	3	0.000378528
2	A2	Genus	Anaerobranca	1	0.000126176
2	A2	Genus	Tenacibaculum	2	0.000252352
2	A2	Genus	Desulfomonile	3	0.000378528
2	A2	Genus	Pseudoxanthomonas	1	0.000126176
2	A2	Genus	Ralstonia	1	0.000126176
2	A2	Genus	Lachnospira	3	0.000378528
2	A2	Genus	Erysipelothrix	1	0.000126176
2	A2	Genus	Sedimentibacter	2	0.000252352
2	A2	Genus	Bacteroides	1	0.000126176
2	A2	Genus	Thiocapsa	2	0.000252352
2	A2	Genus	Oenococcus	1	0.000126176
2	A2	Genus	Desulfotomaculum	1	0.000126176
2	A2	Genus	Bizionia	1	0.000126176
2	A2	Genus	Thiorhodospira	1	0.000126176
2	A2	Genus	Pelomonas	1	0.000126176
2	A2	Genus	Microbacterium	1	0.000126176
2	A2	Genus	Borrelia	1	0.000126176
2	A2	Genus	Desulfofrigus	1	0.000126176
2	A2	Genus	Thiorhodococcus	1	0.000126176
2	A2	Genus	Steroidobacter	1	0.000126176
2	A2	Genus	Arcobacter	2	0.000252352
2	A2	Genus	Morganella	1	0.000126176
2	A2	Genus	Rhizobium	3	0.000378528
2	A2	Genus	Paenibacillus	1	0.000126176
2	A2	Genus	Uliginosibacterium	1	0.000126176
2	A2	Genus	Roseococcus	1	0.000126176
2	A2	Genus	Thermodesulfovibrio	1	0.000126176
2	A2	Genus	Rhodocyclus	1	0.000126176
2	A2	Genus	Spirosoma	1	0.000126176
2	A2	Genus	Asticcacaulis	1	0.000126176
2	A2	Genus	Vibrio	1	0.000126176
2	A2	Genus	Virgibacillus	1	0.000126176
2	A2	Genus	Thiohalorhabdus	1	0.000126176
2	A2	Genus	Pigmentiphaga	1	0.000126176
2	A2	Genus	Arthrobacter	1	0.000126176
2	A2	Genus	Singulisphaera	1	0.000126176
2	A2	Genus	Paracoccus	1	0.000126176
2	A2	Genus	Candidatus Protochlamydia	1	0.000126176
2	A2	Genus	Zobellia	1	0.000126176
2	A2	Genus	Methylotenera	1	0.000126176
2	A2	Genus	Acholeplasma	1	0.000126176
2	A2	Genus	Caldilinea	1	0.000126176
2	A2	Species	Unclassified	156645	19.7648
2	A2	Species	Candidatus Amoebophilus asiaticus	531663	67.0831
2	A2	Species	Chromobacterium haemolyticum	18	0.00227117
2	A2	Species	Acidovorax wohlfahrtii	3065	0.386729
2	A2	Species	Segetibacter aerophilus	32252	4.06943
2	A2	Species	Chitinophaga soli	11739	1.48118
2	A2	Species	Janthinobacterium agaricidamnosum	1124	0.141822
2	A2	Species	Hydrogenophaga defluvii	1381	0.174249
2	A2	Species	Aquitalea denitrificans	675	0.0851688
2	A2	Species	Oxalobacter vibrioformis	46717	5.89456
2	A2	Species	Vogesella perlucida	340	0.0428998
2	A2	Species	Sphingobacterium shayense	524	0.0661162
2	A2	Species	Flavisolibacter ginsengisoli	443	0.0558959
2	A2	Species	Variovorax boronicumulans	64	0.00807526
2	A2	Species	Rhodoferax antarcticus	3164	0.399221
2	A2	Species	Sinorhizobium medicae	4	0.000504704
2	A2	Species	Acidovorax facilis	218	0.0275064
2	A2	Species	Chryseobacterium indologenes	300	0.0378528
2	A2	Species	Fusobacterium gonidiaformans	1	0.000126176
2	A2	Species	Curvibacter gracilis	172	0.0217023
2	A2	Species	Rhodoferax ferrireducens	86	0.0108511
2	A2	Species	Comamonas kerstersii	108	0.013627
2	A2	Species	Variovorax dokdonensis	5	0.00063088
2	A2	Species	Shewanella upenei	10	0.00126176
2	A2	Species	Methylocaldum gracile	2	0.000252352
2	A2	Species	Denitratisoma oestradiolicum	3	0.000378528
2	A2	Species	Niastella koreensis	35	0.00441616
2	A2	Species	Niabella soli	22	0.00277587
2	A2	Species	Acidovorax anthurii	39	0.00492086
2	A2	Species	Legionella cherrii	2	0.000252352
2	A2	Species	Marinobacter arcticus	56	0.00706585
2	A2	Species	Delftia tsuruhatensis	187	0.0235949
2	A2	Species	Neorickettsia helminthoeca	14	0.00176646
2	A2	Species	Methylobacterium marchantiae	147	0.0185479
2	A2	Species	Variovorax ginsengisoli	39	0.00492086
2	A2	Species	Shewanella pneumatophori	7	0.000883232
2	A2	Species	Dechloromonas hortensis	8	0.00100941
2	A2	Species	Delftia lacustris	94	0.0118605
2	A2	Species	Microvirus Enterobacteria phage PhiX174	20	0.00252352
2	A2	Species	Megasphaera hominis	3	0.000378528
2	A2	Species	Agrobacterium tumefaciens	13	0.00164029
2	A2	Species	Hydrogenophaga pseudoflava	111	0.0140055
2	A2	Species	Thiomonas perometabolis	4	0.000504704
2	A2	Species	Pseudomonas moraviensis	119	0.0150149
2	A2	Species	Methyloversatilis universalis	1	0.000126176
2	A2	Species	Chromobacterium piscinae	6	0.000757056
2	A2	Species	Ehrlichia ovina	7	0.000883232
2	A2	Species	Methylobacterium goesingense	59	0.00744438
2	A2	Species	Pseudomonas panipatensis	1	0.000126176
2	A2	Species	Thiomonas thermosulfata	6	0.000757056
2	A2	Species	Propionigenium modestum	40	0.00504704
2	A2	Species	Comamonas nitrativorans	59	0.00744438
2	A2	Species	Shinella fusca	14	0.00176646
2	A2	Species	Porphyromonas canis	54	0.0068135
2	A2	Species	Sphingobium abikonense	6	0.000757056
2	A2	Species	Limnobacter thiooxidans	75	0.0094632
2	A2	Species	Aminiphilus circumscriptus	2	0.000252352
2	A2	Species	Giesbergeria voronezhensis	11	0.00138794
2	A2	Species	Pedobacter daejeonensis	4	0.000504704
2	A2	Species	Deefgea rivuli	3	0.000378528
2	A2	Species	Limnobacter litoralis	13	0.00164029
2	A2	Species	Dysgonomonas wimpennyi	4	0.000504704
2	A2	Species	Cycloclasticus oligotrophus	10	0.00126176
2	A2	Species	Burkholderia andropogonis	1	0.000126176
2	A2	Species	Candidatus Rhabdochlamydia crassificans	4	0.000504704
2	A2	Species	Leptothrix discophora	22	0.00277587
2	A2	Species	Chryseobacterium culicis	2	0.000252352
2	A2	Species	Mycoplasma timone	7	0.000883232
2	A2	Species	Pedobacter suwonensis	2	0.000252352
2	A2	Species	Burkholderia ubonensis	40	0.00504704
2	A2	Species	Tepidimonas thermarum	3	0.000378528
2	A2	Species	Salinicoccus iranensis	6	0.000757056
2	A2	Species	Legionella taurinensis	6	0.000757056
2	A2	Species	Lautropia mirabilis	17	0.00214499
2	A2	Species	Erwinia mallotivora	2	0.000252352
2	A2	Species	Polaribacter butkevichii	1	0.000126176
2	A2	Species	Chryseobacterium formosense	3	0.000378528
2	A2	Species	Calothrix parietina	3	0.000378528
2	A2	Species	Alkaliphilus crotonatoxidans	1	0.000126176
2	A2	Species	Ramlibacter tataouinensis	8	0.00100941
2	A2	Species	Burkholderia phenoliruptrix	7	0.000883232
2	A2	Species	Streptomyces lazureus	4	0.000504704
2	A2	Species	Tepidimonas ignava	2	0.000252352
2	A2	Species	Tetragenococcus doogicus	24	0.00302822
2	A2	Species	Methylobacillus glycogenes	8	0.00100941
2	A2	Species	Burkholderia seminalis	4	0.000504704
2	A2	Species	Legionella fallonii	6	0.000757056
2	A2	Species	Clostridium thermosuccinogenes	1	0.000126176
2	A2	Species	Variovorax soli	3	0.000378528
2	A2	Species	Tolumonas auensis	15	0.00189264
2	A2	Species	Chromobacterium subtsugae	2	0.000252352
2	A2	Species	Luteibacter anthropi	2	0.000252352
2	A2	Species	Enterobacter soli	1	0.000126176
2	A2	Species	Psychromonas aquimarina	1	0.000126176
2	A2	Species	Francisella hispaniensis	5	0.00063088
2	A2	Species	Chryseobacterium gleum	2	0.000252352
2	A2	Species	Chlorobaculum limnaeum	1	0.000126176
2	A2	Species	Hyphomicrobium aestuarii	2	0.000252352
2	A2	Species	Brevibacterium album	2	0.000252352
2	A2	Species	Variovorax paradoxus	2	0.000252352
2	A2	Species	Pedobacter kwangyangensis	2	0.000252352
2	A2	Species	Klebsiella granulomatis	2	0.000252352
2	A2	Species	Roseomonas lacus	1	0.000126176
2	A2	Species	Amaricoccus kaplicensis	4	0.000504704
2	A2	Species	Yersinia nurmii	6	0.000757056
2	A2	Species	Glaciecola nitratireducens	1	0.000126176
2	A2	Species	Niabella aurantiaca	6	0.000757056
2	A2	Species	Herbaspirillum aquaticum	5	0.00063088
2	A2	Species	Desulfurispirillum alkaliphilum	3	0.000378528
2	A2	Species	Gallionella ferruginea	13	0.00164029
2	A2	Species	Candidatus Blochmannia castaneus	4	0.000504704
2	A2	Species	Oceanospirillum linum	1	0.000126176
2	A2	Species	Serratia entomophila	7	0.000883232
2	A2	Species	Pseudomonas lundensis	1	0.000126176
2	A2	Species	Thiobacillus thiophilus	2	0.000252352
2	A2	Species	Rhodothermus clarus	3	0.000378528
2	A2	Species	Oscillospira eae	1	0.000126176
2	A2	Species	Bifidobacterium bombi	2	0.000252352
2	A2	Species	Cetobacterium somerae	5	0.00063088
2	A2	Species	Actinomyces naturae	4	0.000504704
2	A2	Species	Rhodobacter apigmentum	5	0.00063088
2	A2	Species	Herbaspirillum magnetovibrio	7	0.000883232
2	A2	Species	Yersinia ruckeri	1	0.000126176
2	A2	Species	Comamonas composti	8	0.00100941
2	A2	Species	Pedobacter cryoconitis	1	0.000126176
2	A2	Species	Runella limosa	7	0.000883232
2	A2	Species	Comamonas aquatica	1	0.000126176
2	A2	Species	Acinetobacter gerneri	1	0.000126176
2	A2	Species	Pedobacter koreensis	15	0.00189264
2	A2	Species	Lewinella marina	6	0.000757056
2	A2	Species	Desulfovibrio tunisiensis	1	0.000126176
2	A2	Species	Rickettsia monacensis	12	0.00151411
2	A2	Species	Arcanobacterium bernardiae	1	0.000126176
2	A2	Species	Johnsonella ignava	2	0.000252352
2	A2	Species	Acidovorax delafieldii	4	0.000504704
2	A2	Species	Acidovorax temperans	4	0.000504704
2	A2	Species	Mesoplasma entomophilum	2	0.000252352
2	A2	Species	Thiothrix fructosivorans	3	0.000378528
2	A2	Species	Desulfonatronum thiosulfatophilum	5	0.00063088
2	A2	Species	Chthoniobacter flavus	2	0.000252352
2	A2	Species	Moraxella caviae	1	0.000126176
2	A2	Species	Flammeovirga pacifica	2	0.000252352
2	A2	Species	Dokdonella fugitiva	3	0.000378528
2	A2	Species	Polaromonas vacuolata	2	0.000252352
2	A2	Species	Chryseobacterium oranimense	4	0.000504704
2	A2	Species	Kineosporia mikuniensis	1	0.000126176
2	A2	Species	Aquimonas voraii	3	0.000378528
2	A2	Species	Pedobacter insulae	3	0.000378528
2	A2	Species	Ectothiorhodospira haloalkaliphila	1	0.000126176
2	A2	Species	Peptoniphilus methioninivorax	2	0.000252352
2	A2	Species	Campylobacter faecalis	2	0.000252352
2	A2	Species	Azohydromonas australica	1	0.000126176
2	A2	Species	Gluconobacter krungthepensis	1	0.000126176
2	A2	Species	Pseudomonas mendocina	2	0.000252352
2	A2	Species	Planctomyces limnophilus	2	0.000252352
2	A2	Species	Halochromatium salexigens	1	0.000126176
2	A2	Species	Arenimonas malthae	1	0.000126176
2	A2	Species	Aquitalea magnusonii	1	0.000126176
2	A2	Species	Giesbergeria sinuosa	1	0.000126176
2	A2	Species	Anaerotruncus colihominis	3	0.000378528
2	A2	Species	Litoricola lipolytica	1	0.000126176
2	A2	Species	Thermomonas haemolytica	1	0.000126176
2	A2	Species	Propionivibrio dicarboxylicus	3	0.000378528
2	A2	Species	Bacillus isabeliae	1	0.000126176
2	A2	Species	Pseudomonas pseudoalcaligenes	4	0.000504704
2	A2	Species	Chromatium weissei	2	0.000252352
2	A2	Species	Rhodobacter gluconicum	2	0.000252352
2	A2	Species	Micromonospora rifamycinica	1	0.000126176
2	A2	Species	Viridibacillus neidei	1	0.000126176
2	A2	Species	Comamonas odontotermitis	1	0.000126176
2	A2	Species	Pseudomonas teessidea	3	0.000378528
2	A2	Species	Anaerobranca zavarzinii	1	0.000126176
2	A2	Species	Desulfomonile tiedjei	3	0.000378528
2	A2	Species	Halomonas almeriensis	2	0.000252352
2	A2	Species	Pedobacter agri	4	0.000504704
2	A2	Species	Pseudoxanthomonas sacheonensis	1	0.000126176
2	A2	Species	Ralstonia detusculanense	1	0.000126176
2	A2	Species	Helicobacter suncus	3	0.000378528
2	A2	Species	Lachnospira pectinoschiza	3	0.000378528
2	A2	Species	Erysipelothrix muris	1	0.000126176
2	A2	Species	Sedimentibacter hydroxybenzoicus	2	0.000252352
2	A2	Species	Pseudomonas cinnamophila	2	0.000252352
2	A2	Species	Desulfovibrio litoralis	4	0.000504704
2	A2	Species	Wolbachia pipientis	1	0.000126176
2	A2	Species	Serratia ureilytica	1	0.000126176
2	A2	Species	Hydrogenophaga bisanensis	3	0.000378528
2	A2	Species	Pedobacter hartonius	3	0.000378528
2	A2	Species	Halomonas neptunia	1	0.000126176
2	A2	Species	Chryseobacterium joostei	3	0.000378528
2	A2	Species	Desulfotomaculum indicum	1	0.000126176
2	A2	Species	Bizionia saleffrena	1	0.000126176
2	A2	Species	Candidatus Blochmannia herculeanus	1	0.000126176
2	A2	Species	Deefgea chitinilytica	3	0.000378528
2	A2	Species	Pelomonas saccharophila	1	0.000126176
2	A2	Species	Campylobacter canadensis	2	0.000252352
2	A2	Species	Tepidimonas arfidensis	1	0.000126176
2	A2	Species	Achromobacter ruhlandii	1	0.000126176
2	A2	Species	Pedobacter himalayensis	1	0.000126176
2	A2	Species	Pseudomonas anguilliseptica	1	0.000126176
2	A2	Species	Acinetobacter xiamenensis	1	0.000126176
2	A2	Species	Desulfofrigus oceanense	1	0.000126176
2	A2	Species	Thermomonas dokdonensis	1	0.000126176
2	A2	Species	Mycoplasma iguanae	1	0.000126176
2	A2	Species	Thiorhodococcus mannitoliphagus	1	0.000126176
2	A2	Species	Steroidobacter denitrificans	1	0.000126176
2	A2	Species	Luteolibacter algae	2	0.000252352
2	A2	Species	Arcobacter defluvii	1	0.000126176
2	A2	Species	Dyadobacter hamtensis	1	0.000126176
2	A2	Species	Morganella psychrotolerans	1	0.000126176
2	A2	Species	Pseudomonas clemancea	1	0.000126176
2	A2	Species	Candidatus Blochmannia rufipes	1	0.000126176
2	A2	Species	Thauera terpenica	2	0.000252352
2	A2	Species	Herbaspirillum chlorophenolicum	3	0.000378528
2	A2	Species	Uliginosibacterium gangwonense	1	0.000126176
2	A2	Species	Shewanella profunda	1	0.000126176
2	A2	Species	Thermodesulfovibrio thiophilus	1	0.000126176
2	A2	Species	Dechloromonas aromatica	1	0.000126176
2	A2	Species	Rhodocyclus purpureus	1	0.000126176
2	A2	Species	Spirosoma rigui	1	0.000126176
2	A2	Species	Propionivibrio pelophilus	1	0.000126176
2	A2	Species	Virgibacillus salexigens	1	0.000126176
2	A2	Species	Thiohalorhabdus denitrificans	1	0.000126176
2	A2	Species	Arthrobacter soli	1	0.000126176
2	A2	Species	Paracoccus sulfuroxidans	1	0.000126176
2	A2	Species	Arcobacter marinus	1	0.000126176
2	A2	Species	Zobellia laminariae	1	0.000126176
2	A2	Species	Acholeplasma ales	1	0.000126176
2	A2	Species	Cetobacterium ceti	1	0.000126176
2	A2	Species	Caldilinea tarbellica	1	0.000126176
3	A3	Kingdom	Unclassified	13987	3.15791
3	A3	Kingdom	Bacteria	428918	96.8389
3	A3	Kingdom	Viruses	14	0.00316085
3	A3	Phylum	Unclassified	14893	3.36247
3	A3	Phylum	Bacteroidetes	359569	81.1817
3	A3	Phylum	Proteobacteria	68071	15.3687
3	A3	Phylum	Planctomycetes	24	0.0054186
3	A3	Phylum	Firmicutes	207	0.0467354
3	A3	Phylum	DNA	14	0.00316085
3	A3	Phylum	Tenericutes	62	0.013998
3	A3	Phylum	Actinobacteria	51	0.0115145
3	A3	Phylum	Chlamydiae	10	0.00225775
3	A3	Phylum	Cyanobacteria	5	0.00112888
3	A3	Phylum	Verrucomicrobia	4	0.0009031
3	A3	Phylum	Thermi	1	0.000225775
3	A3	Phylum	Fusobacteria	3	0.000677325
3	A3	Phylum	Chlorobi	2	0.00045155
3	A3	Phylum	Nitrospirae	1	0.000225775
3	A3	Phylum	Spirochaetes	1	0.000225775
3	A3	Phylum	Chrysiogenetes	1	0.000225775
3	A3	Class	Unclassified	15586	3.51893
3	A3	Class	Sphingobacteriia	359115	81.0792
3	A3	Class	Betaproteobacteria	66136	14.9319
3	A3	Class	Planctomycetia	24	0.0054186
3	A3	Class	Bacilli	184	0.0415426
3	A3	Class	Gammaproteobacteria	697	0.157365
3	A3	Class	Flavobacteriia	286	0.0645716
3	A3	Class	Epsilonproteobacteria	25	0.00564437
3	A3	Class	Alphaproteobacteria	629	0.142012
3	A3	Class	Group II	14	0.00316085
3	A3	Class	Mollicutes	62	0.013998
3	A3	Class	Actinobacteria	51	0.0115145
3	A3	Class	Deltaproteobacteria	14	0.00316085
3	A3	Class	Bacteroidia	49	0.011063
3	A3	Class	Chlamydiia	10	0.00225775
3	A3	Class	Clostridia	20	0.0045155
3	A3	Class	Nostocophycideae	4	0.0009031
3	A3	Class	Opitutae	4	0.0009031
3	A3	Class	Deinococci	1	0.000225775
3	A3	Class	Fusobacteria	3	0.000677325
3	A3	Class	Chlorobia	2	0.00045155
3	A3	Class	Nitrospira	1	0.000225775
3	A3	Class	Spirochaetes	1	0.000225775
3	A3	Class	Chrysiogenetes	1	0.000225775
3	A3	Order	Unclassified	16370	3.69593
3	A3	Order	Sphingobacteriales	359115	81.0792
3	A3	Order	Burkholderiales	62820	14.1832
3	A3	Order	Neisseriales	2546	0.574823
3	A3	Order	Planctomycetales	3	0.000677325
3	A3	Order	Bacillales	169	0.038156
3	A3	Order	Alteromonadales	167	0.0377044
3	A3	Order	Pseudomonadales	299	0.0675067
3	A3	Order	Flavobacteriales	286	0.0645716
3	A3	Order	Campylobacterales	25	0.00564437
3	A3	Order	Rickettsiales	266	0.0600561
3	A3	Order	(Microviridae)	14	0.00316085
3	A3	Order	Rhizobiales	233	0.0526056
3	A3	Order	Lactobacillales	15	0.00338662
3	A3	Order	Sphingomonadales	41	0.00925677
3	A3	Order	Rhodospirillales	27	0.00609592
3	A3	Order	Acholeplasmatales	54	0.0121919
3	A3	Order	Mycoplasmatales	7	0.00158042
3	A3	Order	Bifidobacteriales	9	0.00203197
3	A3	Order	Rhodocyclales	76	0.0171589
3	A3	Order	Syntrophobacterales	10	0.00225775
3	A3	Order	Thiotrichales	12	0.0027093
3	A3	Order	Legionellales	39	0.00880522
3	A3	Order	Actinomycetales	42	0.00948255
3	A3	Order	Bacteroidales	49	0.011063
3	A3	Order	Desulfovibrionales	4	0.0009031
3	A3	Order	Chlamydiales	10	0.00225775
3	A3	Order	Clostridiales	11	0.00248352
3	A3	Order	Xanthomonadales	15	0.00338662
3	A3	Order	Enterobacteriales	54	0.0121919
3	A3	Order	Rhodobacterales	21	0.00474127
3	A3	Order	Caulobacterales	25	0.00564437
3	A3	Order	Oceanospirillales	33	0.00745057
3	A3	Order	Methylophilales	2	0.00045155
3	A3	Order	Pirellulales	21	0.00474127
3	A3	Order	Thermoanaerobacterales	5	0.00112888
3	A3	Order	Pasteurellales	1	0.000225775
3	A3	Order	Nostocales	4	0.0009031
3	A3	Order	Chromatiales	4	0.0009031
3	A3	Order	Thermales	1	0.000225775
3	A3	Order	Hydrogenophilales	1	0.000225775
3	A3	Order	Fusobacteriales	3	0.000677325
3	A3	Order	Gallionellales	4	0.0009031
3	A3	Order	Chlorobiales	2	0.00045155
3	A3	Order	Nitrospirales	1	0.000225775
3	A3	Order	Borreliales	1	0.000225775
3	A3	Order	Chrysiogenales	1	0.000225775
3	A3	Order	Entomoplasmatales	1	0.000225775
3	A3	Family	Unclassified	24184	5.46014
3	A3	Family	Amoebophilaceae	322798	72.8797
3	A3	Family	Comamonadaceae	50297	11.3558
3	A3	Family	Sphingobacteriaceae	2401	0.542086
3	A3	Family	Chitinophagaceae	26272	5.93156
3	A3	Family	Oxalobacteraceae	12292	2.77522
3	A3	Family	Neisseriaceae	2546	0.574823
3	A3	Family	Planctomycetaceae	3	0.000677325
3	A3	Family	Staphylococcaceae	84	0.0189651
3	A3	Family	Shewanellaceae	107	0.0241579
3	A3	Family	Pseudomonadaceae	287	0.0647974
3	A3	Family	Flavobacteriaceae	286	0.0645716
3	A3	Family	Burkholderiaceae	46	0.0103856
3	A3	Family	Helicobacteraceae	19	0.00428972
3	A3	Family	Rickettsiaceae	234	0.0528313
3	A3	Family	Moraxellaceae	12	0.0027093
3	A3	Family	Microviridae	14	0.00316085
3	A3	Family	Methylobacteriaceae	173	0.0390591
3	A3	Family	Anaplasmataceae	30	0.00677325
3	A3	Family	Sphingomonadaceae	40	0.009031
3	A3	Family	Acetobacteraceae	9	0.00203197
3	A3	Family	Rhizobiaceae	40	0.009031
3	A3	Family	Acholeplasmataceae	54	0.0121919
3	A3	Family	Mycoplasmataceae	7	0.00158042
3	A3	Family	Bifidobacteriaceae	9	0.00203197
3	A3	Family	Enterococcaceae	12	0.0027093
3	A3	Family	Flexibacteraceae	28	0.0063217
3	A3	Family	Rhodocyclaceae	76	0.0171589
3	A3	Family	Desulfobacteraceae	5	0.00112888
3	A3	Family	Thiotrichaceae	10	0.00225775
3	A3	Family	Legionellaceae	30	0.00677325
3	A3	Family	Propionibacteriaceae	6	0.00135465
3	A3	Family	Bacteroidaceae	13	0.00293507
3	A3	Family	Desulfonatronumaceae	2	0.00045155
3	A3	Family	Saprospiraceae	9	0.00203197
3	A3	Family	Clostridiaceae	5	0.00112888
3	A3	Family	Rhodospirillaceae	17	0.00383817
3	A3	Family	Alteromonadaceae	53	0.0119661
3	A3	Family	Xanthomonadaceae	14	0.00316085
3	A3	Family	Actinomycetaceae	26	0.00587015
3	A3	Family	Enterobacteriaceae	54	0.0121919
3	A3	Family	Bacillaceae	84	0.0189651
3	A3	Family	Rhodobacteraceae	17	0.00383817
3	A3	Family	Caulobacteraceae	25	0.00564437
3	A3	Family	Oceanospirillaceae	10	0.00225775
3	A3	Family	Porphyromonadaceae	33	0.00745057
3	A3	Family	Xanthobacteraceae	3	0.000677325
3	A3	Family	Phyllobacteriaceae	9	0.00203197
3	A3	Family	Campylobacteraceae	5	0.00112888
3	A3	Family	Methylophilaceae	2	0.00045155
3	A3	Family	Pirellulaceae	21	0.00474127
3	A3	Family	Erythrobacteraceae	1	0.000225775
3	A3	Family	Lachnospiraceae	3	0.000677325
3	A3	Family	Caldicellulosiruptoraceae	5	0.00112888
3	A3	Family	Paenibacillaceae	1	0.000225775
3	A3	Family	Rhodothermaceae	4	0.0009031
3	A3	Family	Litoricolaceae	17	0.00383817
3	A3	Family	Pasteurellaceae	1	0.000225775
3	A3	Family	Nostocaceae	4	0.0009031
3	A3	Family	Idiomarinaceae	2	0.00045155
3	A3	Family	Nocardioidaceae	2	0.00045155
3	A3	Family	Hyphomicrobiaceae	4	0.0009031
3	A3	Family	Syntrophaceae	5	0.00112888
3	A3	Family	Ectothiorhodospiraceae	2	0.00045155
3	A3	Family	Thermaceae	1	0.000225775
3	A3	Family	Hydrogenophilaceae	1	0.000225775
3	A3	Family	Chromatiaceae	3	0.000677325
3	A3	Family	Alcaligenaceae	4	0.0009031
3	A3	Family	Coxiellaceae	1	0.000225775
3	A3	Family	Halomonadaceae	6	0.00135465
3	A3	Family	Brucellaceae	1	0.000225775
3	A3	Family	Fusobacteriaceae	3	0.000677325
3	A3	Family	Gallionellaceae	4	0.0009031
3	A3	Family	Sinobacteraceae	1	0.000225775
3	A3	Family	Nocardiaceae	1	0.000225775
3	A3	Family	Chlorobiaceae	2	0.00045155
3	A3	Family	Desulfovibrionaceae	2	0.00045155
3	A3	Family	Thermodesulfovibrionaceae	1	0.000225775
3	A3	Family	Francisellaceae	8	0.0018062
3	A3	Family	Moritellaceae	1	0.000225775
3	A3	Family	Ruminococcaceae	3	0.000677325
3	A3	Family	Borreliaceae	1	0.000225775
3	A3	Family	Bartonellaceae	1	0.000225775
3	A3	Family	Piscirickettsiaceae	2	0.00045155
3	A3	Family	Pseudoalteromonadaceae	2	0.00045155
3	A3	Family	Chrysiogenaceae	1	0.000225775
3	A3	Family	Micromonosporaceae	1	0.000225775
3	A3	Family	Streptomycetaceae	2	0.00045155
3	A3	Family	Entomoplasmataceae	1	0.000225775
3	A3	Family	Bradyrhizobiaceae	1	0.000225775
3	A3	Genus	Unclassified	69393	15.6672
3	A3	Genus	Candidatus Amoebophilus	322798	72.8797
3	A3	Genus	Delftia	107	0.0241579
3	A3	Genus	Limnohabitans	356	0.0803759
3	A3	Genus	Pedobacter	1787	0.40346
3	A3	Genus	Segetibacter	19487	4.39968
3	A3	Genus	Oxalobacter	11471	2.58986
3	A3	Genus	Janthinobacterium	447	0.100921
3	A3	Genus	Chitinophaga	4068	0.918452
3	A3	Genus	Vogesella	1403	0.316762
3	A3	Genus	Giesbergeria	1480	0.334147
3	A3	Genus	Rhodoferax	2794	0.630815
3	A3	Genus	Planctomyces	3	0.000677325
3	A3	Genus	Macrococcus	74	0.0167073
3	A3	Genus	Shewanella	107	0.0241579
3	A3	Genus	Hydrogenophaga	1021	0.230516
3	A3	Genus	Pseudomonas	287	0.0647974
3	A3	Genus	Acidovorax	1221	0.275671
3	A3	Genus	Chryseobacterium	198	0.0447034
3	A3	Genus	Burkholderia	36	0.0081279
3	A3	Genus	Helicobacter	19	0.00428972
3	A3	Genus	Rickettsia	234	0.0528313
3	A3	Genus	Comamonas	281	0.0634428
3	A3	Genus	Psychrobacter	8	0.0018062
3	A3	Genus	Flavisolibacter	601	0.135691
3	A3	Genus	Limnobacter	159	0.0358982
3	A3	Genus	Sphingobacterium	581	0.131175
3	A3	Genus	Chromobacterium	780	0.176104
3	A3	Genus	Curvibacter	90	0.0203197
3	A3	Genus	Microvirus	14	0.00316085
3	A3	Genus	Cupriavidus	8	0.0018062
3	A3	Genus	Niastella	39	0.00880522
3	A3	Genus	Methylobacterium	173	0.0390591
3	A3	Genus	Paucibacter	90	0.0203197
3	A3	Genus	Aquitalea	297	0.0670551
3	A3	Genus	Neorickettsia	19	0.00428972
3	A3	Genus	Sphingomonas	26	0.00587015
3	A3	Genus	Gluconobacter	6	0.00135465
3	A3	Genus	Rhizobium	31	0.00699902
3	A3	Genus	Niabella	32	0.0072248
3	A3	Genus	Flavobacterium	15	0.00338662
3	A3	Genus	Candidatus Phytoplasma	53	0.0119661
3	A3	Genus	Mycoplasma	7	0.00158042
3	A3	Genus	Bifidobacterium	9	0.00203197
3	A3	Genus	Enterococcus	2	0.00045155
3	A3	Genus	Hymenobacter	13	0.00293507
3	A3	Genus	Hydrogenophilus	4	0.0009031
3	A3	Genus	Lautropia	6	0.00135465
3	A3	Genus	Thiothrix	10	0.00225775
3	A3	Genus	Roseomonas	2	0.00045155
3	A3	Genus	Polaromonas	23	0.00519282
3	A3	Genus	Legionella	30	0.00677325
3	A3	Genus	Runella	9	0.00203197
3	A3	Genus	Propionibacterium	6	0.00135465
3	A3	Genus	Bacteroides	13	0.00293507
3	A3	Genus	Desulfonatronum	2	0.00045155
3	A3	Genus	Lewinella	9	0.00203197
3	A3	Genus	Peptoniphilus	1	0.000225775
3	A3	Genus	Roseospira	1	0.000225775
3	A3	Genus	Variovorax	29	0.00654747
3	A3	Genus	Ehrlichia	11	0.00248352
3	A3	Genus	Marinobacter	53	0.0119661
3	A3	Genus	Dokdonella	2	0.00045155
3	A3	Genus	Bacillus	77	0.0173847
3	A3	Genus	Alkalibacillus	4	0.0009031
3	A3	Genus	Shinella	5	0.00112888
3	A3	Genus	Rhodobacter	15	0.00338662
3	A3	Genus	Brevundimonas	20	0.0045155
3	A3	Genus	Asticcacaulis	1	0.000225775
3	A3	Genus	Stenotrophomonas	4	0.0009031
3	A3	Genus	Porphyromonas	32	0.0072248
3	A3	Genus	Olivibacter	17	0.00383817
3	A3	Genus	Brenneria	35	0.00790212
3	A3	Genus	Tenacibaculum	2	0.00045155
3	A3	Genus	Thiomonas	6	0.00135465
3	A3	Genus	Polynucleobacter	39	0.00880522
3	A3	Genus	Ancylobacter	1	0.000225775
3	A3	Genus	Herbaspirillum	15	0.00338662
3	A3	Genus	Dechloromonas	64	0.0144496
3	A3	Genus	Phyllobacterium	8	0.0018062
3	A3	Genus	Candidatus Blochmannia	7	0.00158042
3	A3	Genus	Sulfurospirillum	1	0.000225775
3	A3	Genus	Zobellia	3	0.000677325
3	A3	Genus	Methylobacillus	2	0.00045155
3	A3	Genus	Rhodospirillum	11	0.00248352
3	A3	Genus	Serratia	2	0.00045155
3	A3	Genus	Pirellula	21	0.00474127
3	A3	Genus	Erythrobacter	1	0.000225775
3	A3	Genus	Candidatus Liberibacter	1	0.000225775
3	A3	Genus	Rhodocyclus	1	0.000225775
3	A3	Genus	Caldicellulosiruptor	5	0.00112888
3	A3	Genus	Cohnella	1	0.000225775
3	A3	Genus	Rhodothermus	4	0.0009031
3	A3	Genus	Litoricola	17	0.00383817
3	A3	Genus	Collimonas	1	0.000225775
3	A3	Genus	Sphingobium	6	0.00135465
3	A3	Genus	Luteibacter	4	0.0009031
3	A3	Genus	Desulfosarcina	4	0.0009031
3	A3	Genus	Marinospirillum	5	0.00112888
3	A3	Genus	Tepidimonas	2	0.00045155
3	A3	Genus	Actinomyces	1	0.000225775
3	A3	Genus	Pseudidiomarina	2	0.00045155
3	A3	Genus	Campylobacter	4	0.0009031
3	A3	Genus	Nocardioides	2	0.00045155
3	A3	Genus	Dyadobacter	3	0.000677325
3	A3	Genus	Clostridium	4	0.0009031
3	A3	Genus	Tetragenococcus	10	0.00225775
3	A3	Genus	Labrys	2	0.00045155
3	A3	Genus	Ralstonia	1	0.000225775
3	A3	Genus	Sinorhizobium	1	0.000225775
3	A3	Genus	Leptothrix	6	0.00135465
3	A3	Genus	Rhodoplanes	1	0.000225775
3	A3	Genus	Desulfomonile	5	0.00112888
3	A3	Genus	Acinetobacter	4	0.0009031
3	A3	Genus	Xenophilus	4	0.0009031
3	A3	Genus	Thiorhodospira	1	0.000225775
3	A3	Genus	Thermus	1	0.000225775
3	A3	Genus	Arthrospira	2	0.00045155
3	A3	Genus	Thiobacillus	1	0.000225775
3	A3	Genus	Hyphomicrobium	3	0.000677325
3	A3	Genus	Alishewanella	2	0.00045155
3	A3	Genus	Achromobacter	1	0.000225775
3	A3	Genus	Nitrosococcus	1	0.000225775
3	A3	Genus	Staphylococcus	1	0.000225775
3	A3	Genus	Rickettsiella	1	0.000225775
3	A3	Genus	Halomonas	4	0.0009031
3	A3	Genus	Denitratisoma	3	0.000677325
3	A3	Genus	Kushneria	1	0.000225775
3	A3	Genus	Ochrobactrum	1	0.000225775
3	A3	Genus	Deefgea	1	0.000225775
3	A3	Genus	Candidatus Glomeribacter	2	0.00045155
3	A3	Genus	Bizionia	1	0.000225775
3	A3	Genus	Anoxybacillus	1	0.000225775
3	A3	Genus	Gallionella	4	0.0009031
3	A3	Genus	Neisseria	1	0.000225775
3	A3	Genus	Steroidobacter	1	0.000225775
3	A3	Genus	Stenoxybacter	3	0.000677325
3	A3	Genus	Rhodococcus	1	0.000225775
3	A3	Genus	Chlorobaculum	2	0.00045155
3	A3	Genus	Desulfovibrio	2	0.00045155
3	A3	Genus	Thermodesulfovibrio	1	0.000225775
3	A3	Genus	Francisella	8	0.0018062
3	A3	Genus	Lachnospira	1	0.000225775
3	A3	Genus	Moritella	1	0.000225775
3	A3	Genus	Oscillospira	3	0.000677325
3	A3	Genus	Sutterella	1	0.000225775
3	A3	Genus	Acholeplasma	1	0.000225775
3	A3	Genus	Aminobacter	1	0.000225775
3	A3	Genus	Borrelia	1	0.000225775
3	A3	Genus	Denitrobacter	1	0.000225775
3	A3	Genus	Dysgonomonas	1	0.000225775
3	A3	Genus	Pigmentiphaga	1	0.000225775
3	A3	Genus	Bartonella	1	0.000225775
3	A3	Genus	Pontibacter	1	0.000225775
3	A3	Genus	Methylophaga	2	0.00045155
3	A3	Genus	Thioalkalivibrio	1	0.000225775
3	A3	Genus	Pseudoalteromonas	2	0.00045155
3	A3	Genus	Salinicoccus	4	0.0009031
3	A3	Genus	Phenylobacterium	1	0.000225775
3	A3	Genus	Desulfurispirillum	1	0.000225775
3	A3	Genus	Providencia	1	0.000225775
3	A3	Genus	Azospirillum	2	0.00045155
3	A3	Genus	Myroides	2	0.00045155
3	A3	Genus	Micromonospora	1	0.000225775
3	A3	Genus	Streptomyces	1	0.000225775
3	A3	Genus	Mesoplasma	1	0.000225775
3	A3	Genus	Propionivibrio	1	0.000225775
3	A3	Genus	Bradyrhizobium	1	0.000225775
3	A3	Genus	Gillisia	2	0.00045155
3	A3	Genus	Streptacidiphilus	1	0.000225775
3	A3	Species	Unclassified	77957	17.6007
3	A3	Species	Candidatus Amoebophilus asiaticus	322798	72.8797
3	A3	Species	Delftia lacustris	107	0.0241579
3	A3	Species	Segetibacter aerophilus	19487	4.39968
3	A3	Species	Oxalobacter vibrioformis	11470	2.58964
3	A3	Species	Janthinobacterium agaricidamnosum	447	0.100921
3	A3	Species	Chitinophaga soli	4067	0.918227
3	A3	Species	Vogesella perlucida	250	0.0564437
3	A3	Species	Rhodoferax antarcticus	1411	0.318568
3	A3	Species	Planctomyces limnophilus	1	0.000225775
3	A3	Species	Acidovorax wohlfahrtii	1078	0.243385
3	A3	Species	Burkholderia ubonensis	15	0.00338662
3	A3	Species	Comamonas odontotermitis	2	0.00045155
3	A3	Species	Hydrogenophaga defluvii	969	0.218776
3	A3	Species	Flavisolibacter ginsengisoli	601	0.135691
3	A3	Species	Chryseobacterium isbiliense	1	0.000225775
3	A3	Species	Rhodoferax ferrireducens	84	0.0189651
3	A3	Species	Pseudomonas mendocina	24	0.0054186
3	A3	Species	Sphingobacterium shayense	581	0.131175
3	A3	Species	Chryseobacterium indologenes	124	0.0279961
3	A3	Species	Acidovorax facilis	122	0.0275445
3	A3	Species	Curvibacter gracilis	86	0.0194166
3	A3	Species	Microvirus Enterobacteria phage PhiX174	14	0.00316085
3	A3	Species	Cupriavidus metallidurans	8	0.0018062
3	A3	Species	Niastella koreensis	39	0.00880522
3	A3	Species	Methylobacterium jeotgali	56	0.0126434
3	A3	Species	Aquitalea denitrificans	297	0.0670551
3	A3	Species	Neorickettsia helminthoeca	19	0.00428972
3	A3	Species	Comamonas nitrativorans	60	0.0135465
3	A3	Species	Rhizobium leguminosarum	6	0.00135465
3	A3	Species	Niabella soli	23	0.00519282
3	A3	Species	Limnobacter thiooxidans	28	0.0063217
3	A3	Species	Mycoplasma timone	6	0.00135465
3	A3	Species	Bifidobacterium bombi	8	0.0018062
3	A3	Species	Comamonas kerstersii	54	0.0121919
3	A3	Species	Lautropia mirabilis	6	0.00135465
3	A3	Species	Roseomonas massiliensis	2	0.00045155
3	A3	Species	Hydrogenophaga pseudoflava	19	0.00428972
3	A3	Species	Burkholderia phenoliruptrix	3	0.000677325
3	A3	Species	Runella limosa	9	0.00203197
3	A3	Species	Acidovorax anthurii	14	0.00316085
3	A3	Species	Propionibacterium microaerophilum	2	0.00045155
3	A3	Species	Chromobacterium haemolyticum	13	0.00293507
3	A3	Species	Bacteroides xylanisolvens	13	0.00293507
3	A3	Species	Desulfonatronum thiosulfatophilum	2	0.00045155
3	A3	Species	Niabella aurantiaca	7	0.00158042
3	A3	Species	Peptoniphilus methioninivorax	1	0.000225775
3	A3	Species	Variovorax boronicumulans	24	0.0054186
3	A3	Species	Ehrlichia ovina	11	0.00248352
3	A3	Species	Marinobacter arcticus	53	0.0119661
3	A3	Species	Dokdonella fugitiva	2	0.00045155
3	A3	Species	Bacillus alkalogaya	5	0.00112888
3	A3	Species	Alkalibacillus haloalkaliphilus	4	0.0009031
3	A3	Species	Rhodobacter apigmentum	15	0.00338662
3	A3	Species	Pseudomonas parafulva	8	0.0018062
3	A3	Species	Brevundimonas terrae	3	0.000677325
3	A3	Species	Bacillus okhensis	4	0.0009031
3	A3	Species	Porphyromonas canis	32	0.0072248
3	A3	Species	Comamonas composti	6	0.00135465
3	A3	Species	Pedobacter himalayensis	3	0.000677325
3	A3	Species	Vogesella indigofera	2	0.00045155
3	A3	Species	Thiomonas thermosulfata	4	0.0009031
3	A3	Species	Chryseobacterium joostei	5	0.00112888
3	A3	Species	Chryseobacterium greenlandense	1	0.000225775
3	A3	Species	Pseudomonas moraviensis	45	0.0101599
3	A3	Species	Herbaspirillum magnetovibrio	5	0.00112888
3	A3	Species	Flavobacterium branchiophilum	1	0.000225775
3	A3	Species	Candidatus Blochmannia castaneus	4	0.0009031
3	A3	Species	Herbaspirillum aquaticum	4	0.0009031
3	A3	Species	Zobellia laminariae	3	0.000677325
3	A3	Species	Methylobacillus glycogenes	2	0.00045155
3	A3	Species	Giesbergeria voronezhensis	3	0.000677325
3	A3	Species	Rickettsia monacensis	4	0.0009031
3	A3	Species	Acidovorax delafieldii	3	0.000677325
3	A3	Species	Planctomyces maris	1	0.000225775
3	A3	Species	Shewanella pneumatophori	6	0.00135465
3	A3	Species	Pirellula staleyi	19	0.00428972
3	A3	Species	Pedobacter daejeonensis	10	0.00225775
3	A3	Species	Lewinella marina	2	0.00045155
3	A3	Species	Pseudomonas panipatensis	4	0.0009031
3	A3	Species	Rhizobium indigoferae	3	0.000677325
3	A3	Species	Erythrobacter aquimaris	1	0.000225775
3	A3	Species	Acidovorax temperans	2	0.00045155
3	A3	Species	Methylobacterium marchantiae	16	0.0036124
3	A3	Species	Rhodocyclus purpureus	1	0.000225775
3	A3	Species	Rhodothermus clarus	4	0.0009031
3	A3	Species	Pedobacter agri	2	0.00045155
3	A3	Species	Pedobacter koreensis	6	0.00135465
3	A3	Species	Rhizobium lusitanum	7	0.00158042
3	A3	Species	Polynucleobacter rarus	2	0.00045155
3	A3	Species	Legionella taurinensis	5	0.00112888
3	A3	Species	Curvibacter lanceolatus	1	0.000225775
3	A3	Species	Sphingobium abikonense	2	0.00045155
3	A3	Species	Luteibacter anthropi	4	0.0009031
3	A3	Species	Limnobacter litoralis	14	0.00316085
3	A3	Species	Chitinophaga ginsengisoli	1	0.000225775
3	A3	Species	Dechloromonas aromatica	7	0.00158042
3	A3	Species	Actinomyces naturae	1	0.000225775
3	A3	Species	Campylobacter faecalis	4	0.0009031
3	A3	Species	Bacillus pseudofirmus	2	0.00045155
3	A3	Species	Caldicellulosiruptor bescii	1	0.000225775
3	A3	Species	Tetragenococcus doogicus	10	0.00225775
3	A3	Species	Ralstonia detusculanense	1	0.000225775
3	A3	Species	Sinorhizobium fredii	1	0.000225775
3	A3	Species	Leptothrix discophora	6	0.00135465
3	A3	Species	Herbaspirillum frisingense	1	0.000225775
3	A3	Species	Desulfomonile tiedjei	5	0.00112888
3	A3	Species	Acinetobacter gerneri	3	0.000677325
3	A3	Species	Tepidimonas thermarum	1	0.000225775
3	A3	Species	Brevundimonas olei	1	0.000225775
3	A3	Species	Brevundimonas staleyi	3	0.000677325
3	A3	Species	Hyphomicrobium vulgare	1	0.000225775
3	A3	Species	Thiomonas perometabolis	2	0.00045155
3	A3	Species	Desulfosarcina ovata	1	0.000225775
3	A3	Species	Achromobacter arsenitoxydans	1	0.000225775
3	A3	Species	Dechloromonas hortensis	2	0.00045155
3	A3	Species	Pedobacter insulae	1	0.000225775
3	A3	Species	Hyphomicrobium aestuarii	2	0.00045155
3	A3	Species	Nitrosococcus watsoni	1	0.000225775
3	A3	Species	Gluconobacter morbifer	1	0.000225775
3	A3	Species	Pseudomonas pseudoalcaligenes	3	0.000677325
3	A3	Species	Halomonas almeriensis	4	0.0009031
3	A3	Species	Denitratisoma oestradiolicum	3	0.000677325
3	A3	Species	Propionibacterium acnes	4	0.0009031
3	A3	Species	Chryseobacterium oranimense	3	0.000677325
3	A3	Species	Chromobacterium piscinae	4	0.0009031
3	A3	Species	Ochrobactrum thiophenivorans	1	0.000225775
3	A3	Species	Rhizobium pisi	1	0.000225775
3	A3	Species	Hydrogenophaga bisanensis	2	0.00045155
3	A3	Species	Deefgea chitinilytica	1	0.000225775
3	A3	Species	Bizionia saleffrena	1	0.000225775
3	A3	Species	Burkholderia lata	1	0.000225775
3	A3	Species	Dechloromonas agitata	1	0.000225775
3	A3	Species	Variovorax dokdonensis	5	0.00112888
3	A3	Species	Legionella fallonii	3	0.000677325
3	A3	Species	Pseudomonas chloritidismutans	1	0.000225775
3	A3	Species	Anoxybacillus flavithermus	1	0.000225775
3	A3	Species	Gallionella ferruginea	4	0.0009031
3	A3	Species	Neisseria mucosa	1	0.000225775
3	A3	Species	Steroidobacter denitrificans	1	0.000225775
3	A3	Species	Polaromonas vacuolata	1	0.000225775
3	A3	Species	Burkholderia seminalis	4	0.0009031
3	A3	Species	Rhodococcus imtechensis	1	0.000225775
3	A3	Species	Pseudomonas azotoformans	1	0.000225775
3	A3	Species	Comamonas koreensis	2	0.00045155
3	A3	Species	Mycoplasma iguanae	1	0.000225775
3	A3	Species	Desulfovibrio psychrotolerans	1	0.000225775
3	A3	Species	Pseudomonas composti	1	0.000225775
3	A3	Species	Francisella hispaniensis	8	0.0018062
3	A3	Species	Lachnospira pectinoschiza	1	0.000225775
3	A3	Species	Sphingomonas melonis	1	0.000225775
3	A3	Species	Helicobacter mastomyrinus	1	0.000225775
3	A3	Species	Pedobacter cryoconitis	1	0.000225775
3	A3	Species	Moritella japonica	1	0.000225775
3	A3	Species	Pedobacter suwonensis	2	0.00045155
3	A3	Species	Sutterella sanguinus	1	0.000225775
3	A3	Species	Shinella fusca	2	0.00045155
3	A3	Species	Acholeplasma cavigenitalium	1	0.000225775
3	A3	Species	Chryseobacterium formosense	1	0.000225775
3	A3	Species	Denitrobacter permanens	1	0.000225775
3	A3	Species	Herbaspirillum chlorophenolicum	1	0.000225775
3	A3	Species	Dysgonomonas wimpennyi	1	0.000225775
3	A3	Species	Bartonella rochalimae	1	0.000225775
3	A3	Species	Pontibacter niistensis	1	0.000225775
3	A3	Species	Legionella shakespearei	1	0.000225775
3	A3	Species	Thioalkalivibrio jannaschii	1	0.000225775
3	A3	Species	Salinicoccus iranensis	4	0.0009031
3	A3	Species	Desulfurispirillum alkaliphilum	1	0.000225775
3	A3	Species	Giesbergeria sinuosa	1	0.000225775
3	A3	Species	Pseudomonas cinnamophila	1	0.000225775
3	A3	Species	Sphingomonas oligophenolica	1	0.000225775
3	A3	Species	Chryseobacterium caeni	1	0.000225775
3	A3	Species	Myroides odoratus	2	0.00045155
3	A3	Species	Chlorobaculum limnaeum	1	0.000225775
3	A3	Species	Streptomyces lazureus	1	0.000225775
3	A3	Species	Mesoplasma entomophilum	1	0.000225775
3	A3	Species	Bradyrhizobium pachyrhizi	1	0.000225775
3	A3	Species	Pseudomonas corrugata	1	0.000225775
4	A4	Kingdom	Unclassified	18137	4.35407
4	A4	Kingdom	Bacteria	398397	95.6414
4	A4	Kingdom	Viruses	19	0.00456125
4	A4	Phylum	Unclassified	18740	4.49883
4	A4	Phylum	Bacteroidetes	319506	76.7024
4	A4	Phylum	Proteobacteria	78145	18.7599
4	A4	Phylum	Chlamydiae	6	0.00144039
4	A4	Phylum	DNA	19	0.00456125
4	A4	Phylum	Firmicutes	50	0.0120033
4	A4	Phylum	Tenericutes	31	0.00744203
4	A4	Phylum	Actinobacteria	41	0.00984269
4	A4	Phylum	Cyanobacteria	7	0.00168046
4	A4	Phylum	Chrysiogenetes	2	0.000480131
4	A4	Phylum	Verrucomicrobia	2	0.000480131
4	A4	Phylum	Spirochaetes	1	0.000240066
4	A4	Phylum	Fusobacteria	1	0.000240066
4	A4	Phylum	Thermi	1	0.000240066
4	A4	Phylum	Caldithrix	1	0.000240066
4	A4	Class	Unclassified	19239	4.61862
4	A4	Class	Sphingobacteriia	319262	76.6438
4	A4	Class	Betaproteobacteria	76789	18.4344
4	A4	Class	Gammaproteobacteria	607	0.14572
4	A4	Class	Chlamydiia	6	0.00144039
4	A4	Class	Flavobacteriia	152	0.03649
4	A4	Class	Group II	19	0.00456125
4	A4	Class	Alphaproteobacteria	308	0.0739402
4	A4	Class	Bacilli	43	0.0103228
4	A4	Class	Mollicutes	31	0.00744203
4	A4	Class	Bacteroidia	14	0.00336092
4	A4	Class	Actinobacteria	41	0.00984269
4	A4	Class	Oscillatoriophycideae	1	0.000240066
4	A4	Class	Deltaproteobacteria	12	0.00288079
4	A4	Class	Chrysiogenetes	2	0.000480131
4	A4	Class	Epsilonproteobacteria	11	0.00264072
4	A4	Class	Opitutae	2	0.000480131
4	A4	Class	Clostridia	6	0.00144039
4	A4	Class	Nostocophycideae	4	0.000960262
4	A4	Class	Spirochaetes	1	0.000240066
4	A4	Class	Fusobacteria	1	0.000240066
4	A4	Class	Deinococci	1	0.000240066
4	A4	Class	Caldithrixae	1	0.000240066
4	A4	Order	Unclassified	20014	4.80467
4	A4	Order	Sphingobacteriales	319262	76.6438
4	A4	Order	Burkholderiales	73241	17.5826
4	A4	Order	Neisseriales	2819	0.676745
4	A4	Order	Chlamydiales	6	0.00144039
4	A4	Order	Rhodocyclales	14	0.00336092
4	A4	Order	Alteromonadales	127	0.0304883
4	A4	Order	Flavobacteriales	152	0.03649
4	A4	Order	(Microviridae)	19	0.00456125
4	A4	Order	Caulobacterales	28	0.00672183
4	A4	Order	Pseudomonadales	256	0.0614568
4	A4	Order	Lactobacillales	8	0.00192052
4	A4	Order	Bacillales	34	0.00816223
4	A4	Order	Acholeplasmatales	29	0.0069619
4	A4	Order	Rhizobiales	46	0.011043
4	A4	Order	Rhodobacterales	9	0.00216059
4	A4	Order	Rickettsiales	159	0.0381704
4	A4	Order	Bacteroidales	14	0.00336092
4	A4	Order	Oceanospirillales	11	0.00264072
4	A4	Order	Sphingomonadales	28	0.00672183
4	A4	Order	Actinomycetales	36	0.00864236
4	A4	Order	Enterobacteriales	32	0.0076821
4	A4	Order	Chroococcales	1	0.000240066
4	A4	Order	Legionellales	117	0.0280877
4	A4	Order	Thiotrichales	8	0.00192052
4	A4	Order	Rhodospirillales	19	0.00456125
4	A4	Order	Syntrophobacterales	5	0.00120033
4	A4	Order	Methylophilales	3	0.000720197
4	A4	Order	Xanthomonadales	12	0.00288079
4	A4	Order	Chrysiogenales	2	0.000480131
4	A4	Order	Campylobacterales	11	0.00264072
4	A4	Order	Chromatiales	3	0.000720197
4	A4	Order	Pelagicoccales	1	0.000240066
4	A4	Order	Desulfovibrionales	5	0.00120033
4	A4	Order	Clostridiales	4	0.000960262
4	A4	Order	Thermoanaerobacterales	1	0.000240066
4	A4	Order	Hydrogenophilales	1	0.000240066
4	A4	Order	Stigonematales	3	0.000720197
4	A4	Order	Borreliales	1	0.000240066
4	A4	Order	Fusobacteriales	1	0.000240066
4	A4	Order	Thermales	1	0.000240066
4	A4	Order	Bifidobacteriales	3	0.000720197
4	A4	Order	Thermicanales	1	0.000240066
4	A4	Order	Caldithrixales	1	0.000240066
4	A4	Order	Aeromonadales	1	0.000240066
4	A4	Order	Gallionellales	1	0.000240066
4	A4	Order	Nostocales	1	0.000240066
4	A4	Order	Mycoplasmatales	2	0.000480131
4	A4	Family	Unclassified	27255	6.54298
4	A4	Family	Amoebophilaceae	284992	68.4167
4	A4	Family	Comamonadaceae	56787	13.6326
4	A4	Family	Chitinophagaceae	25338	6.08278
4	A4	Family	Oxalobacteraceae	16234	3.89722
4	A4	Family	Neisseriaceae	2819	0.676745
4	A4	Family	Sphingobacteriaceae	1858	0.446042
4	A4	Family	Rhodocyclaceae	14	0.00336092
4	A4	Family	Shewanellaceae	65	0.0156043
4	A4	Family	Flavobacteriaceae	152	0.03649
4	A4	Family	Saprospiraceae	7	0.00168046
4	A4	Family	Alteromonadaceae	60	0.0144039
4	A4	Family	Microviridae	19	0.00456125
4	A4	Family	Caulobacteraceae	28	0.00672183
4	A4	Family	Moraxellaceae	35	0.00840229
4	A4	Family	Flexibacteraceae	13	0.00312085
4	A4	Family	Enterococcaceae	4	0.000960262
4	A4	Family	Burkholderiaceae	55	0.0132036
4	A4	Family	Staphylococcaceae	33	0.00792216
4	A4	Family	Acholeplasmataceae	29	0.0069619
4	A4	Family	Methylobacteriaceae	22	0.00528144
4	A4	Family	Hyphomicrobiaceae	1	0.000240066
4	A4	Family	Rickettsiaceae	150	0.0360098
4	A4	Family	Porphyromonadaceae	14	0.00336092
4	A4	Family	Oceanospirillaceae	4	0.000960262
4	A4	Family	Sphingomonadaceae	27	0.00648177
4	A4	Family	Pseudomonadaceae	221	0.0530545
4	A4	Family	Streptomycetaceae	1	0.000240066
4	A4	Family	Propionibacteriaceae	30	0.00720197
4	A4	Family	Enterobacteriaceae	32	0.0076821
4	A4	Family	Legionellaceae	112	0.0268873
4	A4	Family	Rhodobacteraceae	4	0.000960262
4	A4	Family	Thiotrichaceae	4	0.000960262
4	A4	Family	Coxiellaceae	2	0.000480131
4	A4	Family	Anaplasmataceae	8	0.00192052
4	A4	Family	Waddliaceae	1	0.000240066
4	A4	Family	Rhodospirillaceae	13	0.00312085
4	A4	Family	Syntrophaceae	2	0.000480131
4	A4	Family	Methylophilaceae	3	0.000720197
4	A4	Family	Xanthomonadaceae	11	0.00264072
4	A4	Family	Chrysiogenaceae	2	0.000480131
4	A4	Family	Bradyrhizobiaceae	11	0.00264072
4	A4	Family	Rhizobiaceae	4	0.000960262
4	A4	Family	Piscirickettsiaceae	4	0.000960262
4	A4	Family	Helicobacteraceae	7	0.00168046
4	A4	Family	Pelagicoccaceae	1	0.000240066
4	A4	Family	Francisellaceae	3	0.000720197
4	A4	Family	Phyllobacteriaceae	4	0.000960262
4	A4	Family	Desulfonatronumaceae	5	0.00120033
4	A4	Family	Lachnospiraceae	3	0.000720197
4	A4	Family	Litoricolaceae	3	0.000720197
4	A4	Family	Actinomycetaceae	2	0.000480131
4	A4	Family	Desulfobacteraceae	3	0.000720197
4	A4	Family	Caldicellulosiruptoraceae	1	0.000240066
4	A4	Family	Alcanivoracaceae	1	0.000240066
4	A4	Family	Hydrogenophilaceae	1	0.000240066
4	A4	Family	Rivulariaceae	3	0.000720197
4	A4	Family	Campylobacteraceae	4	0.000960262
4	A4	Family	Borreliaceae	1	0.000240066
4	A4	Family	Acetobacteraceae	6	0.00144039
4	A4	Family	Bartonellaceae	1	0.000240066
4	A4	Family	Glycomycetaceae	1	0.000240066
4	A4	Family	Fusobacteriaceae	1	0.000240066
4	A4	Family	Methylocystaceae	2	0.000480131
4	A4	Family	Thermaceae	1	0.000240066
4	A4	Family	Bifidobacteriaceae	3	0.000720197
4	A4	Family	Halomonadaceae	2	0.000480131
4	A4	Family	Nocardioidaceae	1	0.000240066
4	A4	Family	Chromatiaceae	2	0.000480131
4	A4	Family	Thermicanaceae	1	0.000240066
4	A4	Family	Caldithrixaceae	1	0.000240066
4	A4	Family	Aeromonadaceae	1	0.000240066
4	A4	Family	Sinobacteraceae	1	0.000240066
4	A4	Family	Gallionellaceae	1	0.000240066
4	A4	Family	Planococcaceae	1	0.000240066
4	A4	Family	Micromonosporaceae	1	0.000240066
4	A4	Family	Pseudoalteromonadaceae	1	0.000240066
4	A4	Family	Nostocaceae	1	0.000240066
4	A4	Family	Mycoplasmataceae	2	0.000480131
4	A4	Genus	Unclassified	74981	18.0004
4	A4	Genus	Candidatus Amoebophilus	284992	68.4167
4	A4	Genus	Chitinophaga	4514	1.08366
4	A4	Genus	Segetibacter	18284	4.38936
4	A4	Genus	Rhodoferax	5283	1.26827
4	A4	Genus	Acidovorax	1677	0.40259
4	A4	Genus	Oxalobacter	15356	3.68645
4	A4	Genus	Giesbergeria	1497	0.359378
4	A4	Genus	Chromobacterium	990	0.237665
4	A4	Genus	Flavisolibacter	404	0.0969865
4	A4	Genus	Pedobacter	1513	0.363219
4	A4	Genus	Delftia	232	0.0556952
4	A4	Genus	Aquitalea	278	0.0667382
4	A4	Genus	Hydrogenophaga	845	0.202855
4	A4	Genus	Sphingobacterium	322	0.0773011
4	A4	Genus	Limnohabitans	662	0.158923
4	A4	Genus	Dechloromonas	5	0.00120033
4	A4	Genus	Vogesella	1488	0.357218
4	A4	Genus	Shewanella	65	0.0156043
4	A4	Genus	Paucibacter	165	0.0396108
4	A4	Genus	Comamonas	337	0.0809021
4	A4	Genus	Bergeyella	1	0.000240066
4	A4	Genus	Lewinella	7	0.00168046
4	A4	Genus	Marinobacter	58	0.0139238
4	A4	Genus	Microvirus	19	0.00456125
4	A4	Genus	Brevundimonas	26	0.0062417
4	A4	Genus	Ralstonia	16	0.00384105
4	A4	Genus	Acinetobacter	32	0.0076821
4	A4	Genus	Limnobacter	614	0.1474
4	A4	Genus	Janthinobacterium	510	0.122433
4	A4	Genus	Runella	9	0.00216059
4	A4	Genus	Tetragenococcus	4	0.000960262
4	A4	Genus	Aquabacterium	112	0.0268873
4	A4	Genus	Curvibacter	87	0.0208857
4	A4	Genus	Cupriavidus	18	0.00432118
4	A4	Genus	Burkholderia	37	0.00888242
4	A4	Genus	Salinicoccus	8	0.00192052
4	A4	Genus	Candidatus Phytoplasma	29	0.0069619
4	A4	Genus	Methylobacterium	22	0.00528144
4	A4	Genus	Macrococcus	24	0.00576157
4	A4	Genus	Hyphomicrobium	1	0.000240066
4	A4	Genus	Leptothrix	7	0.00168046
4	A4	Genus	Chryseobacterium	72	0.0172847
4	A4	Genus	Pelomonas	2	0.000480131
4	A4	Genus	Rickettsia	150	0.0360098
4	A4	Genus	Porphyromonas	14	0.00336092
4	A4	Genus	Marinospirillum	3	0.000720197
4	A4	Genus	Sphingomonas	13	0.00312085
4	A4	Genus	Pseudomonas	221	0.0530545
4	A4	Genus	Variovorax	36	0.00864236
4	A4	Genus	Hymenobacter	3	0.000720197
4	A4	Genus	Streptomyces	1	0.000240066
4	A4	Genus	Propionibacterium	30	0.00720197
4	A4	Genus	Herbaspirillum	8	0.00192052
4	A4	Genus	Polaromonas	22	0.00528144
4	A4	Genus	Candidatus Blochmannia	6	0.00144039
4	A4	Genus	Psychrobacter	3	0.000720197
4	A4	Genus	Brenneria	18	0.00432118
4	A4	Genus	Flavobacterium	16	0.00384105
4	A4	Genus	Azoarcus	1	0.000240066
4	A4	Genus	Niastella	28	0.00672183
4	A4	Genus	Legionella	112	0.0268873
4	A4	Genus	Polynucleobacter	22	0.00528144
4	A4	Genus	Rhodobacter	4	0.000960262
4	A4	Genus	Thiothrix	4	0.000960262
4	A4	Genus	Olivibacter	12	0.00288079
4	A4	Genus	Candidatus Glomeribacter	7	0.00168046
4	A4	Genus	Rickettsiella	2	0.000480131
4	A4	Genus	Ehrlichia	4	0.000960262
4	A4	Genus	Waddlia	1	0.000240066
4	A4	Genus	Sphingobium	6	0.00144039
4	A4	Genus	Roseospira	5	0.00120033
4	A4	Genus	Niabella	17	0.00408111
4	A4	Genus	Desulfomonile	2	0.000480131
4	A4	Genus	Methylobacillus	3	0.000720197
4	A4	Genus	Luteibacter	3	0.000720197
4	A4	Genus	Desulfurispirillum	2	0.000480131
4	A4	Genus	Bosea	7	0.00168046
4	A4	Genus	Collimonas	2	0.000480131
4	A4	Genus	Rhizobium	1	0.000240066
4	A4	Genus	Aquimonas	1	0.000240066
4	A4	Genus	Thauera	2	0.000480131
4	A4	Genus	Marinomonas	1	0.000240066
4	A4	Genus	Lautropia	8	0.00192052
4	A4	Genus	Propionivibrio	4	0.000960262
4	A4	Genus	Methylophaga	4	0.000960262
4	A4	Genus	Helicobacter	7	0.00168046
4	A4	Genus	Thiomonas	5	0.00120033
4	A4	Genus	Tepidimonas	3	0.000720197
4	A4	Genus	Neorickettsia	4	0.000960262
4	A4	Genus	Providencia	3	0.000720197
4	A4	Genus	Pelagicoccus	1	0.000240066
4	A4	Genus	Francisella	3	0.000720197
4	A4	Genus	Aminobacter	4	0.000960262
4	A4	Genus	Desulfonatronum	5	0.00120033
4	A4	Genus	Blautia	1	0.000240066
4	A4	Genus	Litoricola	3	0.000720197
4	A4	Genus	Actinomyces	1	0.000240066
4	A4	Genus	Gillisia	1	0.000240066
4	A4	Genus	Xenophilus	16	0.00384105
[truncated: 12,557 more rows]
