# Supplementary material for: Pathogenic shifts in endogenous microbiota impede tissue regeneration via distinct activation of TAK1/MKK/p38
Source: eLife. 2016 Jul 21;5:e16793. doi: 10.7554/eLife.16793 (PMC4993586; doi:10.7554/eLife.16793)
Supplement: Figure 3—source data 1. — DOI: http://dx.doi.org/10.7554/eLife.16793.011 [file elife-16793-fig3-data1.xls]

## Sheet: Figure 3-source data 1A
Header	Description
id	smed_20140614 id
g1	log2(g1/nt0)
g2	log2(g2/nt0)
g3	log2(g3/nt0)
g4	log2(g4/nt0)
nt1	log2(nt1/nt0)
nt2	log2(nt2/nt0)
nt3	log2(nt3/nt0)
nt4	log2(nt4/nt0)
A	average logCPM
clusters	cluster assignment
f1	g1 DE flag, 1 = up, -1 = down
f2	g2 DE flag, 1 = up, -1 = down
f3	g3 DE flag, 1 = up, -1 = down
f4	g4 DE flag, 1 = up, -1 = down
f5	nt1 DE flag, 1 = up, -1 = down
f6	nt2 DE flag, 1 = up, -1 = down
f7	nt3 DE flag, 1 = up, -1 = down
f8	nt4 DE flag, 1 = up, -1 = down
g1.p	p-value
g2.p	p-value
g3.p	p-value
g4.p	p-value
nt1.p	p-value
nt2.p	p-value
nt3.p	p-value
nt4.p	p-value
g1.padj	adjusted p-value
g2.padj	adjusted p-value
g3.padj	adjusted p-value
g4.padj	adjusted p-value
nt1.padj	adjusted p-value
nt2.padj	adjusted p-value
nt3.padj	adjusted p-value
nt4.padj	adjusted p-value
id	smed_20140614 id
oid	orignal ID from origin transcriptome
source	transcriptome of origin
length	transcript length
u033226	matching 033226_uniq ID
e	e-value for 033226_uniq match
num_orfs	number of ORFs in transcript

## Sheet: Figure 3-source data 1B
smed_20140614	g1	g2	g3	g4	nt1	nt2	nt3	nt4	A	clusters	f1	f2	f3	f4	f5	f6	f7	f8	g1.p	g2.p	g3.p	g4.p	nt1.p	nt2.p	nt3.p	nt4.p	g1.padj	g2.padj	g3.padj	g4.padj	nt1.padj	nt2.padj	nt3.padj	nt4.padj	id	oid	source	length	u033226	e	num_orfs	signalp	num_tmhmms	sp_id	sp_evalue	sp_desc	nr_id	nr_evalue	nr_desc
SMED30030523	0.0587633	0.200037	-0.189158	0.174855	0.161844	0.137867	0.0216327	0.275937	0.0587633		0	0	0	0	0	0	0	0	0.701662	0.18555	0.228681	0.25092	0.291344	0.365802	0.889311	0.0649286	0.944807	0.535336	0.540315	0.673066	0.672867	0.752061	0.972889	0.411338	SMED30030523	OX_Smed_1.0.07014	Oxford	1642	NA	NA	.	.	.	.	.	.	.	.	.
SMED30018010	-0.225689	0.248971	-0.044475	0.157957	0.173716	-0.061969	0.0419203	0.232063	-0.225689		0	0	0	0	0	0	0	0	0.230838	0.153359	0.806727	0.375633	0.332698	0.736336	0.818498	0.181862	0.725957	0.491555	0.930441	0.776859	0.712965	0.928297	0.951589	0.61732	SMED30018010	AsxlX1_comp80458_c0_seq1	AsxlX1	2609	sm_688268	0	1	.	0	P39429	1e-05	TNF receptor-associated factor 2	ADF47429.1	4e-17	TNF receptor-associated factor-2-like protein A [Dugesia japonica]
SMED30032462	0.268579	0.44335	0.237432	0.481145	-0.393966	-0.115377	-0.225529	-0.329334	0.268579		0	0	0	0	0	0	0	0	0.520202	0.275021	0.569595	0.236276	0.407824	0.796506	0.624494	0.473595	0.886899	0.633305	0.819231	0.658208	0.763011	0.948421	0.882048	0.830527	SMED30032462	uniq_smed26908	033226_uniq	803	sm_689731	0	.	.	.	.	.	.	.	.	.
SMED30024982	2.0204	1.62965	1.59172	0.590192	0.265761	1.64417	1.5375	1.25283	2.0204		1	0	0	0	0	0	0	0	0.00830968	0.0451036	0.0503241	0.537836	0.793113	0.0432324	0.0652122	0.143329	0.206857	0.271354	0.241964	0.863782	0.941109	0.314045	0.361873	0.563492	SMED30024982	AsxlX1_comp103319_c0_seq1	AsxlX1	603	NA	NA	2	.	0	.	.	.	.	.	.
SMED30017564	0.111462	0.0854171	0.128806	0.0285891	-0.0185699	0.00385348	0.0397525	-0.00848264	0.111462		0	0	0	0	0	0	0	0	0.0417062	0.119948	0.0180535	0.60642	0.740514	0.944585	0.474395	0.878003	0.431079	0.44127	0.127918	0.887882	0.925366	0.987432	0.811291	0.971753	SMED30017564	AsxlWT_comp37188_c0_seq1	AsxlWT	1328	SMEDS2F2_0000234	3	1	.	2	Q99571	1e-107	P2X purinoceptor 4	ESP00966.1	5e-119	hypothetical protein LOTGIDRAFT_207736 [Lottia gigantea]
SMED30034967	-0.102112	-0.244939	-0.287865	-0.133712	-0.0103809	-0.145025	-0.18732	-0.14086	-0.102112		0	0	0	0	0	0	0	0	0.280383	0.00970764	0.00237611	0.157734	0.912622	0.125409	0.0479187	0.136535	0.765039	0.112653	0.032791	0.564385	0.978119	0.502782	0.311028	0.556383	SMED30034967	SxlWT_comp65093_c0_seq22	SxlWT	5512	SMEDS2F2_0002021	0	1	.	0	Q99323	0	Myosin heavy chain, non-muscle	CDJ07417.1	0	myosin heavy chain, non muscle [Hymenolepis microstoma]
SMED30001930	1.7539	1.76222	0.988143	1.05985	0.244125	1.77413	1.37742	2.21099	1.7539		0	0	0	0	0	0	0	0	0.0576908	0.0565368	0.334411	0.301903	0.832429	0.054895	0.162542	0.0102871	0.485408	0.304283	0.645897	0.717839	0.954523	0.353194	0.547049	0.160379	SMED30001930	Sxlregen_comp79916_c0_seq1	Sxlregen	952	SMEDS2F2_0001778	3	1	.	0	.	.	.	EFN67636.1	1e-07	PiggyBac transposable element-derived protein 4 [Camponotus floridanus]
SMED30004208	-0.247279	-0.16508	-0.158825	-0.391382	-0.102397	-0.161721	-0.240983	-0.0596571	-0.247279		0	0	0	0	0	0	0	0	0.00225365	0.0405313	0.0481917	1.80777e-06	0.204846	0.0449329	0.00304172	0.455778	0.101382	0.255801	0.236167	0.000116765	0.587417	0.320576	0.0641661	0.825515	SMED30004208	AsxlWT_comp51597_c0_seq1	AsxlWT	2268	SMEDS2F2_0002823	0	1	.	0	Q80T23	1e-34	Synaptotagmin-like protein 5 [Mus musculus]	ELU00294.1	2e-43	hypothetical protein CAPTEDRAFT_184235 [Capitella teleta]
SMED30026859	-0.0155145	0.00273813	-0.0311714	-0.13233	0.00943023	-0.0420328	-0.069146	-0.120675	-0.0155145		0	0	0	0	0	0	0	0	0.793601	0.963159	0.59872	0.027512	0.874382	0.479922	0.248033	0.0430343	0.968399	0.990783	0.836085	0.238229	0.967708	0.817414	0.649094	0.338391	SMED30026859	AsxlWT_comp18970_c0_seq1	AsxlWT	2426	smed009934	1	1	.	0	.	.	.	ENN70308.1	1e-08	hypothetical protein YQE_12819, partial [Dendroctonus ponderosae]
SMED30000071	0.00358218	0.460552	0.410309	0.517705	-0.0815426	0.0540226	-0.00111649	0.148579	0.00358218		0	0	0	0	0	0	0	0	0.991445	0.155036	0.206013	0.110151	0.81407	0.873018	0.997542	0.655447	0.998955	0.494019	0.514326	0.484173	0.948823	0.969501	0.999233	0.906073	SMED30000071	OX_Smed_1.0.10609	Oxford	444	isotig20223	0	.	.	.	.	.	.	.	.	.
SMED30017890	0.0768711	-0.130015	0.0132422	0.249866	-0.121469	-0.046221	0.0719532	-0.0476325	0.0768711		0	0	0	0	0	0	0	0	0.738003	0.580829	0.954252	0.270873	0.610431	0.843161	0.756522	0.837588	0.956425	0.839249	0.985878	0.693668	0.87411	0.96221	0.930395	0.962433	SMED30017890	AsxlX1_comp74504_c0_seq2	AsxlX1	1970	smed006334	0	1	.	0	.	.	.	.	.	.
SMED30009269	-0.0723782	-0.18479	-0.109769	-0.208307	-0.0732987	-0.0501159	-0.0520034	-0.109423	-0.0723782		0	0	0	0	0	0	0	0	0.437416	0.0477391	0.238931	0.0257676	0.432068	0.590765	0.577095	0.240525	0.852908	0.278774	0.552485	0.229623	0.779121	0.870588	0.860378	0.680402	SMED30009269	AsxlWT_comp42338_c0_seq1	AsxlWT	1462	SMEDS2F2_0002598	1	1	YES	0	A2AX52	2e-29	Collagen alpha-4(VI) chain	EKC20504.1	2e-34	Cartilage matrix protein, partial [Crassostrea gigas]
SMED30031490	-0.0525303	0.0230308	0.133832	-0.0024365	-0.0622844	-0.0232509	0.0180236	-0.0566594	-0.0525303		0	0	0	0	0	0	0	0	0.4651	0.746865	0.0561852	0.972985	0.393164	0.746267	0.802352	0.429663	0.86275	0.917603	0.257387	0.993431	0.752126	0.931175	0.946285	0.811559	SMED30031490	AsxlWT_comp49242_c1_seq1	AsxlWT	1147	SMEDS2F2_0001503	2	1	.	0	Q5U201	3e-36	Protein AMN1 homolog [Rattus norvegicus]	XP_001635812.1	1e-41	predicted protein [Nematostella vectensis]
SMED30013475	-0.0916644	-0.0595723	-0.0863253	-0.0766456	-0.0111892	-0.0817901	-0.0847649	-0.0760272	-0.0916644		0	0	0	0	0	0	0	0	0.0414674	0.184719	0.0543931	0.0889783	0.803763	0.0690649	0.0603733	0.0902681	0.43039	0.53414	0.252698	0.437078	0.94545	0.393434	0.348686	0.471656	SMED30013475	AsxlWT_comp56861_c0_seq1	AsxlWT	3208	SMEDS2F2_0000668	0	1	.	0	Q24368	0	Chromatin-remodeling complex ATPase chain Iswi	CCD79230.1	0	putative helicase [Schistosoma mansoni]
SMED30017130	0.0348741	-0.0629114	0.126405	0.059745	-0.0122265	0.00976423	0.0544046	0.162736	0.0348741		0	0	0	0	0	0	0	0	0.755164	0.577436	0.252948	0.594235	0.914176	0.930727	0.62854	0.140424	0.95921	0.838377	0.565851	0.881859	0.978359	0.985268	0.883647	0.560295	SMED30017130	AsxlWT_comp101060_c0_seq1	AsxlWT	600	smed008335	1	1	.	0	.	.	.	.	.	.
SMED30034676	0.22643	0.0554716	0.125296	0.295644	0.326384	0.324279	0.208933	0.241592	0.22643		0	0	0	0	0	0	0	0	0.0870104	0.680276	0.346766	0.025191	0.0137544	0.0135817	0.117704	0.066867	0.550852	0.88842	0.65685	0.226561	0.156825	0.173073	0.475135	0.416476	SMED30034676	AsxlWT_comp56748_c0_seq1	AsxlWT	1470	SMEDS2F2_0002050	5	1	.	7	Q28596	8e-06	Thyrotropin-releasing hormone receptor	CDJ10455.1	8e-77	Orphan Rhodopsin-like G protein-coupled receptor [Hymenolepis microstoma]
SMED30024623	-0.012338	-0.0305679	0.0335401	-0.0393024	0.0716861	0.108683	0.00653534	0.0680456	-0.012338		0	0	0	0	0	0	0	0	0.862054	0.667536	0.63479	0.582341	0.31357	0.123209	0.92702	0.334351	0.977674	0.883018	0.850342	0.877322	0.695283	0.500581	0.981941	0.753542	SMED30024623	Sxlembryo_comp96086_c1_seq23	Sxlembryo	1846	sm_rc_289749	10	2	.	0	.	.	.	.	.	.
SMED30034408	0.0189354	0.0819317	-0.539934	0.121409	0.20852	0.134911	0.0975968	0.1474	0.0189354		0	0	0	0	0	0	0	0	0.923556	0.675228	0.0123	0.534839	0.283452	0.487383	0.621149	0.443041	0.98791	0.886126	0.0989702	0.862512	0.665452	0.821847	0.88093	0.819302	SMED30034408	uniq_sm_rc_644115	033226_uniq	426	sm_rc_644115	0	.	.	.	.	.	.	.	.	.
SMED30014256	0.162855	-0.468817	-0.509102	-0.570181	0.117744	0.49343	0.439921	0.212536	0.162855		0	0	0	0	0	0	0	0	0.672074	0.267346	0.227975	0.187142	0.764202	0.18077	0.239874	0.57612	0.934372	0.62653	0.539325	0.605093	0.934242	0.579849	0.641454	0.879345	SMED30014256	uniq_sm_260946	033226_uniq	353	sm_260946	0	.	.	.	.	.	.	.	.	.
SMED30007846	-0.0796093	-0.0939174	-0.0544371	-0.0880775	-0.148792	-0.0693914	-0.155333	-0.0465093	-0.0796093		0	0	0	0	0	0	0	0	0.459268	0.383359	0.611634	0.414902	0.171228	0.51923	0.152804	0.664579	0.858886	0.725486	0.840937	0.798907	0.544536	0.83977	0.534343	0.90908	SMED30007846	AsxlWT_comp61287_c0_seq1	AsxlWT	2784	SMEDS2F2_0002772	0	1	.	3	Q9MZS1	0	Potassium/sodium hyperpolarization-activated cyclic nucleotide-gated channel 1	CDJ18473.1	0	hyperpolarization activated cyclic [Echinococcus granulosus]
SMED30016942	-0.125255	-0.109107	-0.250779	-0.0553998	0.0486307	-0.166761	-0.265503	-0.222585	-0.125255		0	0	0	0	0	0	0	0	0.391539	0.455027	0.0907045	0.704032	0.736836	0.258717	0.0793331	0.132039	0.834347	0.767537	0.333784	0.923501	0.924116	0.665753	0.395248	0.548474	SMED30016942	AsxlX1_comp72302_c0_seq1	AsxlX1	1395	JCR.Scratch	6	1	.	0	Q99M85	6e-77	Transcriptional repressor scratch 1	EUB63920.1	3e-100	Transcriptional repressor scratch [Echinococcus granulosus]
SMED30025729	-0.558366	-0.275956	-0.363485	-0.383246	-0.141724	-0.32592	0.114436	-0.0960797	-0.558366		-1	0	0	0	0	0	0	0	0.00637824	0.157223	0.0644855	0.055821	0.46459	0.0986352	0.535133	0.608749	0.183274	0.49778	0.278229	0.34572	0.801164	0.456893	0.839475	0.888758	SMED30025729	AsxlX1_comp52230_c0_seq3	AsxlX1	1213	SMEDS2F2_0001978	0	1	.	0	Q6IND7	3e-76	LRP2-binding protein	ELT91021.1	2e-75	hypothetical protein CAPTEDRAFT_223760 [Capitella teleta]
SMED30034032	-0.0151917	0.0285442	0.166928	0.0415661	0.0169463	-0.0795555	0.0232041	-0.038959	-0.0151917		0	0	0	0	0	0	0	0	0.777738	0.595212	0.00171265	0.439962	0.753973	0.141303	0.667111	0.469201	0.964795	0.846504	0.0261789	0.813556	0.930372	0.528131	0.900785	0.830381	SMED30034032	AsxlWT_comp48419_c0_seq1	AsxlWT	1546	SMEDS2F2_0001822	1	1	.	0	P35615	0	Eukaryotic peptide chain release factor subunit 1	ESO93046.1	0	hypothetical protein LOTGIDRAFT_216289 [Lottia gigantea]
SMED30008107	0.0217511	0.0580895	-0.0332597	-0.0273535	0.0548243	-0.00405487	-0.0178377	-0.00395229	0.0217511		0	0	0	0	0	0	0	0	0.703823	0.309214	0.561675	0.635242	0.340839	0.943701	0.757322	0.944958	0.946041	0.666301	0.813962	0.897462	0.717966	0.987171	0.930526	0.987173	SMED30008107	Sxlembryo_comp96695_c0_seq13	Sxlembryo	1504	SMEDS2F2_0003133	0	1	.	0	P11181	6e-146	Lipoamide acyltransferase component of branched-chain alpha-keto acid dehydrogenase complex, mitochondrial	EFB14675.1	1e-144	hypothetical protein PANDA_009610 [Ailuropoda melanoleuca]
SMED30035995	-0.11092	-0.203802	0.0691338	-0.116506	0.0348014	-0.101138	-0.116625	-0.0910655	-0.11092		0	0	0	0	0	0	0	0	0.299342	0.0607899	0.502938	0.280286	0.743048	0.345066	0.282287	0.390378	0.778192	0.314783	0.771878	0.703416	0.926	0.738318	0.67992	0.788487	SMED30035995	AsxlWT_comp55221_c0_seq2	AsxlWT	975	SMEDS2F2_0003152	0	1	.	4	.	.	.	XP_005094880.1	1e-17	transmembrane protein 47-like, partial [Aplysia californica]
SMED30031888	0.017265	0.0335445	-0.00529642	-0.0255921	0.0866055	0.0444182	-0.0184384	0.0194612	0.017265		0	0	0	0	0	0	0	0	0.71341	0.475411	0.91027	0.587134	0.0657327	0.344655	0.695742	0.678742	0.949194	0.783174	0.969842	0.878375	0.352157	0.738009	0.911949	0.915223	SMED30031888	AsxlWT_comp61240_c1_seq1	AsxlWT	3221	SMEDS2F2_0002937	3	1	.	1	Q659C4	9e-53	La-related protein 1B	XP_004040427.1	3e-56	la-related protein 1B-like [Gorilla gorilla gorilla]
SMED30023356	8.48794e-05	0.402541	0.000191787	0.28624	0.0957036	0.0218579	0.520852	0.365057	8.48794e-05		0	0	0	0	0	0	0	0	0.999775	0.151335	0.999469	0.320413	0.749827	0.941874	0.0613054	0.193151	1	0.488878	0.999767	0.735126	0.928658	0.987015	0.351559	0.630212	SMED30023356	uniq_isotig25680	033226_uniq	503	isotig25680	0	.	.	.	.	.	.	.	.	.
SMED30034817	-0.058001	0.102604	-0.232157	0.259862	-0.0187716	0.141624	0.357329	0.221179	-0.058001		0	0	0	0	0	0	0	0	0.776224	0.606835	0.265447	0.184948	0.927443	0.475931	0.065598	0.25673	0.964333	0.852162	0.578987	0.602354	0.98245	0.815801	0.362833	0.694032	SMED30034817	SRG12_1732_c0s1	SRG12	783	NA	NA	1	.	0	.	.	.	XP_004206864.1	1e-10	uncharacterized protein LOC101240217 [Hydra vulgaris]
SMED30020796	-0.539258	-0.531751	-0.0378121	-0.859724	-0.161077	0.399596	-1.32426	1.39263	-0.539258		0	0	0	0	0	0	0	0	0.504605	0.510747	0.959278	0.317167	0.835234	0.565964	0.155083	0.0172938	0.881621	0.805318	0.987132	0.732177	0.955036	0.8626	0.535949	0.213478	SMED30020796	dd_smedV4_67000_0_1	Dresden	605	NA	NA	1	.	0	.	.	.	.	.	.
SMED30020304	0.683383	-0.000816548	0.348667	-0.49546	0.288745	0.560179	-1.32429	-0.564714	0.683383		0	0	0	0	0	0	0	0	0.301636	0.999119	0.616043	0.540913	0.687896	0.408591	0.155075	0.484025	0.780196	0.999667	0.841107	0.864659	0.906345	0.779827	0.535949	0.835622	SMED30020304	Sxlembryo_comp100573_c0_seq10	Sxlembryo	403	sm_rc_504715	9	.	.	.	.	.	.	.	.	.
SMED30027963	0.341494	0.485041	0.310461	0.373771	-0.197279	0.328419	-0.243032	0.0201032	0.341494		0	0	0	0	0	0	0	0	0.173172	0.0484762	0.215568	0.137226	0.47561	0.192594	0.381244	0.93885	0.675722	0.28135	0.524848	0.535438	0.808968	0.593874	0.752581	0.986212	SMED30027963	OX_Smed_1.0.01496	Oxford	656	NA	NA	1	.	0	.	.	.	.	.	.
SMED30035564	0.773552	0.484692	1.1988	0.680565	0.570959	1.04164	0.97901	0.745514	0.773552		0	0	1	0	0	0	0	0	0.104799	0.334141	0.00656203	0.163756	0.255689	0.0226828	0.0358508	0.117978	0.582273	0.687178	0.0655615	0.574337	0.638872	0.227365	0.270176	0.527525	SMED30035564	Sxlregen_comp75157_c0_seq1	Sxlregen	1419	smed013288	3	1	.	0	Q8GT75	3e-06	NEP1-interacting protein 1	XP_003765716.1	0.0002	E3 ubiquitin-protein ligase RNF149, partial [Sarcophilus harrisii]
SMED30007614	0.0245157	0.0279672	0.098047	0.0275646	-0.0851925	-0.0988805	-0.101369	-0.0196073	0.0245157		0	0	0	0	0	0	0	0	0.71892	0.681582	0.146331	0.68721	0.220089	0.151943	0.144149	0.77389	0.950794	0.889101	0.432382	0.916448	0.604953	0.543717	0.521171	0.945992	SMED30007614	AsxlWT_comp40960_c0_seq1	AsxlWT	1514	isotig24691	0	1	.	0	P30684	1e-148	Guanine nucleotide-binding protein G(s) subunit alpha	XP_005092762.1	3e-149	guanine nucleotide-binding protein G(s) subunit alpha-like isoform X1 [Aplysia californica]
SMED30032092	0.0995099	0.437411	-0.150499	-0.0716216	0.584524	0.652568	0.392439	0.475828	0.0995099		0	0	0	0	0	0	0	0	0.753344	0.147985	0.644903	0.826622	0.0511961	0.0267858	0.201745	0.112408	0.958706	0.484373	0.854223	0.95763	0.31239	0.246731	0.599247	0.517945	SMED30032092	uniq_sm_rc_471479	033226_uniq	456	sm_rc_471479	0	.	.	.	.	.	.	.	.	.
SMED30006483	-0.099725	-0.14351	-0.0436767	-0.161833	-0.221274	-0.173104	-0.0377746	-0.0437209	-0.099725		0	0	0	0	0	0	0	0	0.102128	0.0192656	0.470597	0.00871537	0.000385961	0.0049174	0.536539	0.470515	0.578847	0.170511	0.75288	0.116235	0.0167335	0.0959229	0.840274	0.830527	SMED30006483	AsxlWT_comp62779_c2_seq10	AsxlWT	1732	SMEDS2F2_0002811	0	1	.	0	Q10058	4e-44	Putative oxidoreductase C1F5.03c [Schizosaccharomyces pombe 972h-]	CCD78572.1	2e-83	putative fad oxidoreductase [Schistosoma mansoni]
SMED30019927	-0.358566	-0.237324	-0.132033	-0.00953122	-0.42528	-0.390974	-0.181274	0.228536	-0.358566		0	0	0	0	0	0	0	0	0.250863	0.440912	0.663167	0.974848	0.182578	0.213465	0.557301	0.433815	0.745255	0.758545	0.864141	0.993985	0.559209	0.617642	0.84966	0.814787	SMED30019927	AsxlX1_comp84352_c2_seq1	AsxlX1	993	smed007863	1	1	.	0	P34583	9e-05	Uncharacterized protein T26G10.4 [Caenorhabditis elegans]	ETW96843.1	2e-16	hypothetical protein ETSY2_45675 [Candidatus Entotheonella sp. TSY2]
SMED30025520	0.0787985	0.150378	0.231027	0.13463	0.0720819	0.205471	0.1672	0.0639866	0.0787985		0	0	0	0	0	0	0	0	0.22324	0.0193692	0.000276942	0.0374047	0.270992	0.00133223	0.00970033	0.322059	0.72073	0.171326	0.00677041	0.282355	0.653712	0.0430978	0.13294	0.74299	SMED30025520	AsxlWT_comp37460_c0_seq1	AsxlWT	964	SMEDS2F2_0001139	2	1	.	0	B1AZ99	1e-43	OTU domain-containing protein 3 [Mus musculus]	XP_002129173.1	4e-50	OTU domain-containing protein 3-like [Ciona intestinalis]
SMED30030515	-0.0745679	-0.244391	-0.377131	-0.203812	-0.0408687	-0.399831	-0.040854	-0.213097	-0.0745679		0	0	0	0	0	0	0	0	0.624415	0.119976	0.0181748	0.195013	0.790987	0.0135709	0.790339	0.169806	0.916809	0.44127	0.128413	0.614903	0.940221	0.173073	0.941794	0.602513	SMED30030515	OX_Smed_1.0.12681	Oxford	1160	NA	NA	1	.	0	.	.	.	.	.	.
SMED30016119	-0.0715726	-0.0144257	-0.38743	-0.719085	-0.213935	-0.136987	-0.366845	-0.239609	-0.0715726	1	0	0	0	-1	0	0	0	0	0.622457	0.920606	0.00947601	4.17162e-06	0.150821	0.349963	0.0150071	0.103984	0.916809	0.976349	0.0833272	0.000240377	0.513034	0.741227	0.172221	0.503013	SMED30016119	berlin_CUFF.309467.1	Berlin	534	isotig01918	9	.	.	.	.	.	.	.	.	.
SMED30002517	0.062064	0.0384135	0.146119	0.164515	-0.0112691	0.175731	0.131293	0.106418	0.062064		0	0	0	0	0	0	0	0	0.448219	0.639636	0.0713054	0.043496	0.892248	0.030418	0.10891	0.190927	0.854479	0.86846	0.293321	0.305735	0.97341	0.262575	0.458374	0.627073	SMED30002517	AsxlWT_comp38124_c0_seq1	AsxlWT	846	sm_145677	1	1	.	2	.	.	.	CCD79365.1	2e-21	hypothetical protein Smp_145460 [Schistosoma mansoni]
SMED30015218	0.116637	0.0854504	-0.0704323	-0.0053827	0.1919	0.0883733	0.0813302	0.0991266	0.116637		0	0	0	0	0	0	0	0	0.0358704	0.124785	0.207675	0.92337	0.00056767	0.112502	0.145131	0.0745218	0.406289	0.44918	0.516105	0.981778	0.0214655	0.481762	0.522755	0.437833	SMED30015218	Sxlembryo_comp94027_c0_seq1	Sxlembryo	2917	SMEDS2F2_0003237	3	1	YES	0	Q865F1	2e-10	Microsomal triglyceride transfer protein large subunit	EKC23979.1	1e-22	Microsomal triglyceride transfer protein large subunit [Crassostrea gigas]
SMED30022739	0.210956	0.198951	0.2121	0.188839	-0.152446	-0.0414457	0.0825578	0.116802	0.210956		0	0	0	0	0	0	0	0	0.208225	0.23665	0.20368	0.264765	0.393001	0.811539	0.63182	0.489772	0.706168	0.593572	0.511802	0.686346	0.752034	0.953077	0.885232	0.83911	SMED30022739	uniq_SMEDS2F2_00023840-RA_1_469	033226_uniq	469	SMEDS2F2_0002384	0	1	.	0	.	.	.	.	.	.
SMED30024912	0.0233192	0.0779211	0.0506949	-0.0263956	0.0444528	0.139261	0.0572153	0.0157065	0.0233192		0	0	0	0	0	0	0	0	0.675574	0.159722	0.359545	0.639888	0.429566	0.0115132	0.307173	0.777581	0.935317	0.500975	0.668166	0.899011	0.777953	0.15863	0.701549	0.947452	SMED30024912	AsxlWT_comp57017_c0_seq4	AsxlWT	2137	smed015398	6	1	.	0	Q15542	6e-98	Transcription initiation factor TFIID subunit 5	CDJ08852.1	2e-105	transcription initiation factor tfiid subunit 5 [Hymenolepis microstoma]
SMED30019095	0.117604	0.172281	0.0259021	0.0818266	0.232453	0.287187	0.036215	-0.112837	0.117604		0	0	0	0	0	0	0	0	0.511141	0.332805	0.88566	0.650724	0.193844	0.102913	0.842521	0.538163	0.883368	0.686251	0.959351	0.90377	0.574414	0.465363	0.958856	0.863644	SMED30019095	AsxlWT_comp49114_c0_seq3	AsxlWT	909	smed26887	1	1	.	0	Q9P2P6	7e-32	StAR-related lipid transfer protein 9	XP_004077596.1	4e-36	uncharacterized protein LOC101165914 [Oryzias latipes]
SMED30004103	-0.0393103	0.0465761	0.0229075	-0.0465092	-0.00631567	-0.0910928	-0.0985389	-0.0737203	-0.0393103		0	0	0	0	0	0	0	0	0.541544	0.465064	0.718724	0.473669	0.922621	0.161176	0.13302	0.252757	0.894929	0.774917	0.893187	0.833092	0.981268	0.556681	0.501231	0.691202	SMED30004103	SxlWT_comp59364_c0_seq1	SxlWT	1273	SMEDS2F2_0001454	0	1	.	0	Q8TDN4	7e-51	CDK5 and ABL1 enzyme substrate 1	ELU05908.1	3e-59	hypothetical protein CAPTEDRAFT_221978 [Capitella teleta]
SMED30035732	0.211912	0.24924	0.194968	0.0733318	0.21788	0.0299502	-0.132233	-0.0549442	0.211912		0	0	0	0	0	0	0	0	0.302388	0.222791	0.341369	0.729993	0.297095	0.888198	0.550691	0.797566	0.780367	0.579593	0.652197	0.930539	0.67893	0.97348	0.84724	0.953403	SMED30035732	OX_Smed_1.0.10945	Oxford	306	NA	NA	1	YES	0	.	.	.	AHD24753.1	4e-07	X1.C.A4.1, partial [Schmidtea mediterranea]
SMED30022831	-0.122817	-0.144912	0.465669	-0.441475	0.0628872	0.219697	-0.12652	-0.332596	-0.122817		0	0	0	0	0	0	0	0	0.659379	0.603104	0.0945158	0.114404	0.821366	0.429958	0.649928	0.233462	0.928507	0.850877	0.341627	0.49142	0.952349	0.789998	0.894161	0.675647	SMED30022831	uniq_sm_696213	033226_uniq	626	sm_696213	0	.	.	.	.	.	.	.	.	.
SMED30018177	0.112752	0.173304	0.0975743	0.210772	0.234695	0.175778	0.156969	0.219897	0.112752		0	0	0	0	0	0	0	0	0.0232745	0.000476532	0.0494515	2.16741e-05	2.3254e-06	0.000396817	0.00160873	8.84636e-06	0.336471	0.0137955	0.23941	0.000991885	0.000383346	0.0192143	0.0430442	0.00092859	SMED30018177	AsxlWT_comp60716_c0_seq1	AsxlWT	4739	JCR.InsRB.f	0	2	.	1	Q25410	2e-109	Putative molluscan insulin-related peptide(s) receptor	AEM45794.1	0	insulin receptor-like 1 protein [Schmidtea mediterranea]
SMED30021272	-0.103574	0.118353	-0.335663	-0.390259	0.285191	-0.0351692	0.380294	0.356637	-0.103574		0	0	0	0	0	0	0	0	0.710175	0.661752	0.241471	0.182695	0.287231	0.898961	0.149563	0.171783	0.948069	0.880531	0.554814	0.600075	0.670094	0.97726	0.529672	0.605507	SMED30021272	OX_Smed_1.0.09099	Oxford	542	sm_712148	0	.	.	.	.	.	.	.	.	.
SMED30019599	-0.0479123	-0.121595	-0.087369	0.097047	0.179464	0.0265466	0.0146409	0.15422	-0.0479123		0	0	0	0	0	0	0	0	0.609654	0.200566	0.352317	0.294571	0.051459	0.775645	0.876392	0.0892876	0.913374	0.553651	0.661595	0.713474	0.313149	0.942236	0.969115	0.470017	SMED30019599	SxlWT_comp65830_c0_seq2	SxlWT	3154	rc_smed015850	2	1	.	0	.	.	.	.	.	.
SMED30033410	0.867198	-0.179692	0.605562	0.682926	0.29133	0.777645	0.943157	-0.00762607	0.867198		0	0	0	0	0	0	0	0	0.151905	0.803301	0.335594	0.278009	0.667531	0.207341	0.119349	0.991258	0.65016	0.937043	0.646095	0.701148	0.899909	0.610101	0.477757	0.998155	SMED30033410	SxlWT_comp17704_c0_seq2	SxlWT	2382	smed021627	0	2	.	0	P18258	5e-112	Tubulin alpha-1 chain	GAA37663.2	5e-119	tubulin alpha, partial [Clonorchis sinensis]
SMED30032014	0.0383415	0.00451544	0.179258	0.185352	0.0010294	0.215716	0.0892873	0.265532	0.0383415		0	0	0	0	0	0	0	0	0.729268	0.967729	0.0966243	0.08959	0.992761	0.0461733	0.422469	0.0127152	0.954103	0.992219	0.345369	0.438337	0.9973	0.324854	0.779688	0.181084	SMED30032014	AsxlWT_comp55492_c0_seq1	AsxlWT	1261	SMEDS2F2_0001274	1	1	.	7	P28646	6e-50	Somatostatin receptor type 1	EKC28440.1	9e-61	Somatostatin receptor type 1 [Crassostrea gigas]
SMED30009031	-0.188663	-0.0919165	-0.0626385	-0.0170673	-0.239141	-0.193885	-0.187322	-0.0327187	-0.188663		0	0	0	0	0	0	0	0	0.00962237	0.205979	0.387896	0.814222	0.00108816	0.0078429	0.0103181	0.651898	0.224361	0.560118	0.691268	0.953544	0.033098	0.127409	0.137671	0.904732	SMED30009031	AsxlWT_comp62028_c0_seq4	AsxlWT	4191	SMEDS2F2_0001841	0	2	YES	0	Q9ET66	8e-13	Peptidase inhibitor 16	XP_006820741.1	1e-17	cysteine-rich secretory protein 2-like [Saccoglossus kowalevskii]
SMED30034028	-0.664302	-0.490715	-0.0250423	-0.997781	-0.577947	-0.63943	0.18703	-0.870666	-0.664302		0	0	0	0	0	0	0	0	0.287831	0.421066	0.964674	0.133459	0.357119	0.306561	0.737265	0.174969	0.769692	0.750688	0.98796	0.529737	0.728284	0.707551	0.926595	0.610488	SMED30034028	dd_smedV4_22412_0_1	Dresden	545	NA	NA	1	.	0	.	.	.	.	.	.
SMED30034856	0.0441361	0.0139715	0.0155399	-0.126885	0.054225	-0.0336866	-0.0512977	-0.0399582	0.0441361		0	0	0	0	0	0	0	0	0.514031	0.837094	0.818186	0.0678305	0.428041	0.622528	0.457637	0.557382	0.884481	0.948917	0.93477	0.382092	0.776824	0.885185	0.803595	0.871746	SMED30034856	AsxlX1_comp82791_c1_seq6	AsxlX1	1192	SMEDS2F2_0002500	3	1	.	0	A5PJG7	4e-74	Cytochrome c-type heme lyase	CAX72900.1	2e-80	putative Cytochrome c-type heme lyase (CCHL) [Schistosoma japonicum]
SMED30013077	-0.127084	-0.113062	-0.1323	0.0340522	-0.176532	-0.0874454	-0.137607	-0.0200752	-0.127084		0	0	0	0	0	0	0	0	0.0353863	0.0611248	0.0279599	0.567928	0.00416349	0.146867	0.0243387	0.735592	0.403315	0.315652	0.168788	0.872597	0.076673	0.53681	0.221081	0.935285	SMED30013077	AsxlX1_comp84193_c0_seq12	AsxlX1	3259	SMEDS2F2_0001632	0	1	.	0	P16157	1e-50	Ankyrin-1	XP_001649474.1	7e-92	ankyrin 2,3/unc44 [Aedes aegypti]
SMED30018602	1.42968	0.658026	0.956739	0.584741	1.12608	0.725168	0.727113	0.448347	1.42968	3	1	0	0	0	1	0	0	0	0.000105589	0.119066	0.0162786	0.174495	0.00436311	0.0829751	0.0850831	0.302584	0.0124309	0.439824	0.119915	0.589291	0.0793847	0.425871	0.408358	0.72966	SMED30018602	Sxlembryo_comp100461_c0_seq39	Sxlembryo	607	SMEDS2F2_0003602	1	1	.	0	P46942	8e-45	ATP-dependent RNA helicase-like protein DB10	GAA50893.1	3e-50	ATP-dependent RNA helicase DDX5/DBP2 [Clonorchis sinensis]
SMED30008947	0.0113734	0.298978	0.284181	0.14986	0.108204	0.261217	0.0898919	0.192732	0.0113734		0	0	0	0	0	0	0	0	0.945561	0.0593882	0.0718321	0.360906	0.51637	0.102647	0.589717	0.229831	0.991917	0.31134	0.294399	0.766287	0.828669	0.464692	0.866019	0.671314	SMED30008947	AsxlWT_comp54440_c0_seq1	AsxlWT	788	SMEDS2F2_0000707	1	1	.	0	O35817	4e-16	A-kinase anchor protein 14	XP_002603479.1	1e-33	hypothetical protein BRAFLDRAFT_280477 [Branchiostoma floridae]
SMED30033677	0.643754	-0.0870273	0.795553	0.690954	1.4684	1.40617	0.719442	0.411729	0.643754		0	0	0	0	0	0	0	0	0.422246	0.922088	0.308545	0.389667	0.042189	0.0516622	0.370669	0.618261	0.848605	0.97692	0.620625	0.784612	0.284811	0.343055	0.745286	0.890089	SMED30033677	AsxlX1_comp83863_c0_seq43	AsxlX1	2456	smed007320	0	3	.	0	.	.	.	EZA49528.1	2e-12	hypothetical protein X777_12229 [Cerapachys biroi]
SMED30024891	0.205165	0.110155	0.270738	0.821572	0.868459	0.726634	0.979017	0.933872	0.205165		0	0	0	0	0	0	0	0	0.696306	0.836888	0.600398	0.084991	0.0686937	0.132169	0.0358545	0.043133	0.942726	0.948917	0.83634	0.42865	0.358138	0.512667	0.270176	0.338645	SMED30024891	uniq_sm_470709	033226_uniq	347	sm_470709	0	.	.	.	.	.	.	.	.	.
SMED30005852	-0.0775724	0.0724088	0.0382274	-0.0496848	-0.0981137	0.0178805	-0.109573	-0.133163	-0.0775724		0	0	0	0	0	0	0	0	0.138702	0.163111	0.461294	0.343975	0.0636284	0.731624	0.037979	0.0112175	0.637373	0.506176	0.74574	0.754308	0.346111	0.926307	0.278497	0.168271	SMED30005852	AsxlWT_comp70837_c0_seq1	AsxlWT	1338	SMEDS2F2_0000410	0	1	.	6	Q2HJ10	1e-79	Zinc transporter 2	ESP02659.1	1e-92	hypothetical protein LOTGIDRAFT_180179 [Lottia gigantea]
SMED30011379	-0.109796	-0.195489	-0.174025	-0.21006	-0.12782	-0.109232	-0.0832215	-0.104596	-0.109796		0	0	0	0	0	0	0	0	0.0354846	0.000185882	0.00086645	6.03167e-05	0.0145767	0.0365012	0.11126	0.0450868	0.403669	0.00666709	0.0158222	0.00234555	0.161893	0.288369	0.462112	0.346433	SMED30011379	SxlWT_comp66414_c1_seq23	SxlWT	2125	SMEDS2F2_0001404	0	1	.	0	O00534	7e-83	von Willebrand factor A domain-containing protein 5A	AFJ24785.1	3e-136	vault protein inter alpha trypsin-1, partial [Schmidtea mediterranea]
SMED30009064	-0.875425	-0.381779	-0.691823	-0.427101	-0.295556	-0.211989	-0.39836	0.0675298	-0.875425		0	0	0	0	0	0	0	0	0.064551	0.38081	0.129213	0.334533	0.498479	0.617187	0.36848	0.866011	0.50591	0.723659	0.405595	0.748697	0.82051	0.88329	0.743528	0.968872	SMED30009064	AsxlX1_comp62352_c0_seq1	AsxlX1	1537	SMEDS2F2_0001894	6	2	.	0	P13360	3e-66	Protein glass [Drosophila melanogaster]	EGI57499.1	6e-69	Protein glass [Acromyrmex echinatior]
SMED30019572	0.307705	-0.635658	-0.492692	-0.255746	0.401587	-0.622616	-0.227645	-0.18532	0.307705		0	0	0	0	0	0	0	0	0.56483	0.311629	0.418101	0.66669	0.453144	0.321944	0.701719	0.748532	0.904863	0.668152	0.715842	0.90964	0.793663	0.717339	0.912078	0.939444	SMED30019572	Sxlembryo_comp102068_c0_seq5	Sxlembryo	2554	NA	NA	1	.	0	.	.	.	.	.	.
SMED30005237	0.38998	0.234002	0.288474	0.606083	0.427439	0.287611	0.263063	0.324166	0.38998	5	0	0	0	1	0	0	0	0	0.000120907	0.0214437	0.00450675	2.17955e-09	2.60999e-05	0.00467156	0.00979927	0.00140762	0.0135945	0.180933	0.050852	2.95787e-07	0.00250333	0.0928159	0.133903	0.0453574	SMED30005237	AsxlWT_comp59403_c0_seq1	AsxlWT	2408	sm_150499	4	1	.	0	Q9BSK1	1e-16	Zinc finger protein 577 [Homo sapiens]	EUB55762.1	8e-41	Zinc finger and BTB domain-containing protein [Echinococcus granulosus]
SMED30029324	-0.928649	-1.041	-0.959739	-0.480451	0.194393	-0.506678	-0.13855	-0.646599	-0.928649		0	0	0	0	0	0	0	0	0.0511282	0.0322159	0.0435816	0.281051	0.62791	0.255225	0.743229	0.152128	0.46524	0.225602	0.222819	0.703744	0.88334	0.663255	0.928617	0.578534	SMED30029324	AsxlX1_comp83436_c1_seq12	AsxlX1	1710	smed017729	15	2	.	0	.	.	.	.	.	.
SMED30011671	0.264023	0.325725	-0.540432	0.312358	0.303846	0.748024	-0.0294308	-0.362512	0.264023		0	0	0	0	0	0	0	0	0.505104	0.40663	0.232419	0.430649	0.448001	0.04075	0.944543	0.409108	0.881621	0.742455	0.545225	0.807253	0.790288	0.304469	0.986495	0.798607	SMED30011671	uniq_sm_654835	033226_uniq	305	sm_654835	0	.	.	.	.	.	.	.	.	.
SMED30027388	-0.0496691	0.0742536	0.100244	0.164453	-0.0719849	0.0961983	0.122396	0.146955	-0.0496691		0	0	0	0	0	0	0	0	0.54023	0.358362	0.214143	0.0417349	0.376648	0.233945	0.13026	0.0683703	0.893818	0.706367	0.523073	0.29905	0.741976	0.640559	0.496826	0.421154	SMED30027388	AsxlWT_comp52015_c0_seq1	AsxlWT	1828	SMEDS2F2_0002194	4	1	.	0	.	.	.	.	.	.
SMED30031796	-0.127513	0.057994	-0.0315989	-0.0205034	0.0427744	-0.0889614	0.0687281	0.0542689	-0.127513		0	0	0	0	0	0	0	0	0.238572	0.58392	0.766701	0.848749	0.690214	0.410075	0.519517	0.607146	0.735261	0.840878	0.913985	0.963553	0.906983	0.780947	0.833108	0.888758	SMED30031796	Sxlembryo_comp101317_c0_seq58	Sxlembryo	3971	SMEDS2F2_0003005	0	2	.	0	.	.	.	.	.	.
SMED30012443	0.476261	0.709867	0.560702	0.62705	-1.15632	-0.860987	0.423033	0.324137	0.476261		0	0	0	0	0	0	0	0	0.491103	0.2909	0.410225	0.357471	0.189021	0.300421	0.548178	0.645116	0.874616	0.649663	0.71007	0.763872	0.56793	0.702428	0.845429	0.901599	SMED30012443	berlin_isotig11963	Berlin	546	isotig11963	0	.	.	.	.	.	.	.	.	.
SMED30017219	-0.108349	-0.0458161	-0.0245045	0.0566901	-0.0756457	-0.0460141	0.052608	0.0988238	-0.108349		0	0	0	0	0	0	0	0	0.0574415	0.419997	0.664875	0.316411	0.187221	0.418421	0.353519	0.0782805	0.484353	0.750401	0.865389	0.731929	0.565396	0.78421	0.740666	0.446101	SMED30017219	AsxlWT_comp58696_c0_seq3	AsxlWT	3521	SMEDS2F2_0001876	0	2	YES	1	P18293	0	Atrial natriuretic peptide receptor 1	CCD75732.1	0	protein kinase [Schistosoma mansoni]
SMED30015500	0.0127219	-0.432665	-0.0864824	-0.239305	-0.540642	-0.125329	-0.340673	-0.0375932	0.0127219		0	0	0	0	0	0	0	0	0.962345	0.127321	0.74968	0.390655	0.0635422	0.647394	0.228912	0.889166	0.994946	0.452975	0.906628	0.784612	0.345893	0.895918	0.628514	0.97511	SMED30015500	uniq_sm_rc_656540	033226_uniq	577	sm_rc_656540	0	.	.	.	.	.	.	.	.	.
SMED30009436	-0.128143	-0.518415	-0.727963	-0.429443	-0.213231	-0.226282	-0.217509	-0.270347	-0.128143	9	0	-1	-1	0	0	0	0	0	0.33102	0.000227975	4.7317e-07	0.00210892	0.116859	0.0923842	0.1087	0.0440467	0.79684	0.00777732	3.73817e-05	0.0421518	0.461	0.445322	0.457813	0.342306	SMED30009436	dd_smedV4_18415_0_1	Dresden	1773	SMEDS2F2_0000676	7	1	.	0	.	.	.	XP_005098734.1	2e-13	myosin heavy chain, non-muscle-like isoform X1 [Aplysia californica]
SMED30021297	0.0267712	0.0711666	0.0789896	0.130468	0.158415	-0.00414806	0.0104117	0.0498908	0.0267712		0	0	0	0	0	0	0	0	0.640481	0.214026	0.167268	0.0227016	0.00570795	0.942401	0.856271	0.383598	0.922305	0.570092	0.464552	0.212578	0.0936896	0.987137	0.964437	0.785459	SMED30021297	AsxlX1_comp71807_c0_seq1	AsxlX1	1364	SMEDS2F2_0001619	2	1	.	0	Q6R005	4e-30	Disks large homolog 4	BAK23256.1	2e-32	discs large 1 [Gryllus bimaculatus]
SMED30030509	-0.0714406	-0.105119	-0.103037	-0.101577	-0.0536604	-0.140835	-0.196078	0.00840707	-0.0714406		0	0	0	0	0	0	0	0	0.567768	0.404053	0.409771	0.423352	0.672538	0.267869	0.130735	0.945354	0.90488	0.740859	0.710033	0.803684	0.902572	0.673929	0.497438	0.987173	SMED30030509	Sxlembryo_comp101906_c0_seq10	Sxlembryo	1067	smed014872	25	1	.	0	.	.	.	.	.	.
SMED30030955	-4.44428	-0.0395827	0.284487	-0.694138	-0.260884	0.105044	-0.117303	-2.87536	-4.44428	8	-1	0	0	0	0	0	0	-1	0.000111992	0.946418	0.607272	0.295229	0.674954	0.855351	0.846231	0.00193186	0.0127837	0.985371	0.839828	0.713474	0.902572	0.965363	0.959683	0.056198	SMED30030955	AsxlX1_comp67102_c0_seq1	AsxlX1	392	NA	NA	1	.	0	.	.	.	.	.	.
SMED30019839	-0.373398	-0.294827	-0.252502	-0.592972	-0.708087	0.0323335	-0.0391733	-0.406639	-0.373398		0	0	0	0	0	0	0	0	0.300452	0.408902	0.474774	0.113193	0.0644824	0.924948	0.910558	0.25952	0.779808	0.744791	0.755299	0.489015	0.348269	0.984678	0.978844	0.69517	SMED30019839	AsxlX1_comp81629_c1_seq15	AsxlX1	1167	NA	NA	1	.	0	.	.	.	.	.	.
SMED30021198	0.604511	0.522503	0.173524	0.130683	0.940288	0.336543	0.84632	0.661616	0.604511		0	0	0	0	0	0	0	0	0.251454	0.329041	0.758308	0.820678	0.0631381	0.543479	0.0987751	0.202785	0.745255	0.683563	0.910712	0.955619	0.344817	0.852438	0.440037	0.642685	SMED30021198	uniq_sm_rc_526230	033226_uniq	329	sm_rc_526230	0	.	.	.	.	.	.	.	.	.
SMED30002057	0.104335	0.267813	0.331987	0.452602	-0.448	0.477534	0.290011	0.799471	0.104335		0	0	0	0	0	0	0	0	0.819849	0.550693	0.454041	0.305013	0.369536	0.276307	0.521128	0.0578627	0.971107	0.826783	0.741125	0.720979	0.737769	0.682321	0.833689	0.390886	SMED30002057	uniq_sm_rc_500209	033226_uniq	512	sm_rc_500209	0	.	.	.	.	.	.	.	.	.
SMED30003581	-0.674956	-0.15979	0.0909165	-0.352254	-0.437802	0.228273	0.439498	-1.48959	-0.674956		0	0	0	0	0	0	0	0	0.226814	0.755067	0.851915	0.509158	0.42325	0.634656	0.347606	0.0193748	0.722997	0.920912	0.946944	0.852224	0.774548	0.890944	0.73625	0.225345	SMED30003581	AsxlX1_comp71517_c0_seq1	AsxlX1	1326	smed019743	2	2	.	8	Q92847	0.0006	Growth hormone secretagogue receptor type 1	ELU18022.1	2e-12	hypothetical protein CAPTEDRAFT_197663 [Capitella teleta]
SMED30032696	-0.00282386	0.0224424	0.0506533	0.0196581	0.0989179	0.0417594	0.0110401	-0.000681509	-0.00282386		0	0	0	0	0	0	0	0	0.957139	0.669253	0.334728	0.708385	0.0598123	0.426667	0.833658	0.98965	0.994271	0.88346	0.645897	0.924397	0.33607	0.787711	0.955639	0.998155	SMED30032696	AsxlWT_comp63940_c0_seq1	AsxlWT	1105	SMEDS2F2_0000094	1	1	.	0	P92177	9e-90	14-3-3 protein epsilon	AEV89773.1	2e-92	14-3-3 protein epsilon [Schistocerca gregaria]
SMED30012215	-0.14702	0.00563408	-0.338566	0.0908062	0.0464207	-0.176601	0.247529	0.366787	-0.14702		0	0	0	0	0	0	0	0	0.680573	0.987093	0.356273	0.792822	0.89497	0.624217	0.464227	0.258831	0.936965	0.996699	0.665299	0.947542	0.973517	0.886078	0.806147	0.694493	SMED30012215	uniq_smed29121	033226_uniq	468	smed29121	0	.	.	.	.	.	.	XP_558399.5	3e-17	Anopheles gambiae str. PEST AGAP012527-PA [Anopheles gambiae str. PEST]
SMED30000684	0.0575141	-0.121367	0.0428881	-0.0740695	0.221066	-0.119882	0.0150867	-0.295918	0.0575141		0	0	0	0	0	0	0	0	0.644114	0.337147	0.730003	0.558058	0.0747154	0.343366	0.904484	0.0208292	0.92376	0.687987	0.89931	0.868724	0.37032	0.737023	0.976464	0.235435	SMED30000684	AsxlWT_comp32709_c0_seq1	AsxlWT	588	smed017954	0	1	.	0	.	.	.	.	.	.
SMED30003506	0.130409	-0.0319628	0.0752922	-0.00649549	0.0125426	-0.00151209	0.0316207	-0.0192182	0.130409		0	0	0	0	0	0	0	0	0.0239343	0.582992	0.192726	0.911257	0.829892	0.979259	0.587149	0.740798	0.33985	0.840286	0.497608	0.978043	0.953721	0.995134	0.865162	0.937372	SMED30003506	Sxlembryo_comp94841_c0_seq1	Sxlembryo	2257	SMEDS2F2_0000433	0	1	.	0	Q9UJX5	7e-19	Anaphase-promoting complex subunit 4	EUB59158.1	4e-32	Anaphase-promoting complex subunit 4 [Echinococcus granulosus]
SMED30032876	-0.0395172	0.108044	0.127723	0.00128747	-0.0385777	-0.0258357	0.0551221	0.0613717	-0.0395172		0	0	0	0	0	0	0	0	0.60478	0.151327	0.0879561	0.98655	0.617393	0.735321	0.469723	0.415684	0.911176	0.488878	0.327976	0.997968	0.877993	0.927897	0.809297	0.802829	SMED30032876	AsxlWT_comp60153_c0_seq1	AsxlWT	2453	SMEDS2F2_0001120	26	1	.	0	Q6DFC6	3e-24	WD repeat-containing protein 75	ESO84533.1	1e-26	hypothetical protein LOTGIDRAFT_236208 [Lottia gigantea]
SMED30022908	-0.0497677	-0.213674	-0.449248	-0.0778372	0.00899522	-0.332392	-0.102031	-0.116351	-0.0497677		0	0	0	0	0	0	0	0	0.784196	0.254072	0.0204293	0.672825	0.960834	0.0831309	0.583653	0.524661	0.965549	0.614306	0.138798	0.911255	0.990563	0.426101	0.863272	0.857787	SMED30022908	OX_Smed_1.0.00350	Oxford	652	rc_smed27129	1	1	.	0	Q9NZT1	8e-05	Calmodulin-like protein 5	XP_002750060.1	2e-06	calmodulin-like protein 5 [Callithrix jacchus]
SMED30023415	0.0291679	-0.0165839	0.0668371	-0.0908021	0.211566	-0.0211743	0.274545	0.151727	0.0291679		0	0	0	0	0	0	0	0	0.893997	0.940186	0.757209	0.687392	0.326919	0.923934	0.196756	0.476503	0.982236	0.984071	0.910489	0.916471	0.708386	0.984678	0.594147	0.831361	SMED30023415	uniq_sm_rc_259993	033226_uniq	473	sm_rc_259993	0	.	.	.	.	.	.	.	.	.
SMED30020628	0.0348598	0.0540511	0.0255557	0.0557364	0.00567261	0.00791852	0.138235	0.0254638	0.0348598		0	0	0	0	0	0	0	0	0.595849	0.410335	0.696624	0.398233	0.932292	0.904611	0.034969	0.697973	0.909783	0.744924	0.882736	0.786445	0.983638	0.978471	0.266851	0.921797	SMED30020628	AsxlX1_comp76335_c0_seq3	AsxlX1	1661	SMEDS2F2_0002665	3	1	.	0	Q6PE18	9e-165	Phosphatidylinositol 4-kinase type 2-alpha	ELU06765.1	1e-172	hypothetical protein CAPTEDRAFT_152761 [Capitella teleta]
SMED30010030	0.442048	-0.027336	0.0370411	-0.0419445	0.0599141	0.256412	-0.0694278	0.206053	0.442048		0	0	0	0	0	0	0	0	0.0749989	0.919203	0.888688	0.877544	0.824273	0.319012	0.800708	0.423145	0.529826	0.975826	0.960862	0.971666	0.952518	0.716288	0.946285	0.807077	SMED30010030	SRG12_14162_c0s1	SRG12	378	smed011250	2	1	.	0	.	.	.	.	.	.
SMED30009494	0.236608	0.0867408	-0.183832	-0.415749	-0.0878924	-0.247246	-0.0749448	0.0593468	0.236608		0	0	0	0	0	0	0	0	0.231889	0.668174	0.379226	0.0578025	0.676024	0.245175	0.720264	0.768925	0.727491	0.883263	0.685208	0.350918	0.902783	0.653384	0.919488	0.943991	SMED30009494	uniq_sm_rc_554039	033226_uniq	956	sm_rc_554039	0	.	.	.	.	.	.	.	.	.
SMED30032782	-0.201513	-0.222903	-0.0726256	-0.167225	0.0225853	0.052172	0.00419366	-0.259913	-0.201513		0	0	0	0	0	0	0	0	0.139644	0.104128	0.583849	0.221812	0.865717	0.690455	0.974945	0.0579687	0.638013	0.411252	0.827834	0.644317	0.965461	0.912808	0.993631	0.391338	SMED30032782	Asxlsort_comp75561_c2_seq2	Asxlsort	973	SMEDS2F2_0002231	4	.	.	.	.	.	.	.	.	.
SMED30005977	0.0897393	0.117087	0.0980994	0.0492497	0.196769	0.122106	0.122523	0.031328	0.0897393		0	0	0	0	0	0	0	0	0.121364	0.0429449	0.0893237	0.398876	0.000687483	0.0348812	0.035101	0.589583	0.607916	0.264299	0.330836	0.787199	0.0244548	0.28218	0.26725	0.883806	SMED30005977	AsxlWT_comp19101_c0_seq1	AsxlWT	652	SMEDS2F2_0000473	0	1	.	1	Q3T0I5	3e-14	Mitochondrial fission 1 protein	XP_007435870.1	1e-14	mitochondrial fission 1 protein isoform X1 [Python bivittatus]
SMED30018670	-0.65276	-0.692583	-0.942147	-0.604337	-0.996564	-0.946874	-0.891586	-0.307975	-0.65276		0	0	-1	0	-1	-1	-1	0	0.039857	0.03063	0.00453452	0.057402	0.00378222	0.00481702	0.00806696	0.300379	0.425055	0.2192	0.0510618	0.349441	0.0725071	0.0947652	0.117906	0.727608	SMED30018670	Asxlsort_comp81159_c1_seq15	Asxlsort	373	NA	NA	1	.	0	.	.	.	.	.	.
SMED30002447	-1.38069	0.412046	-0.87925	-0.804574	-0.760081	-2.21115	-1.31041	-0.0541653	-1.38069		0	0	0	0	0	-1	0	0	0.0519477	0.43332	0.175642	0.217044	0.244659	0.00684056	0.0665047	0.923684	0.467534	0.754204	0.476561	0.638376	0.628092	0.117922	0.364798	0.98271	SMED30002447	Sxlembryo_comp61196_c0_seq1	Sxlembryo	602	NA	NA	1	.	2	.	.	.	CDJ19247.1	6e-15	rhodopsin orphan GPCR [Echinococcus granulosus]
SMED30033691	1.66101	1.27382	-0.202526	1.14975	1.35624	1.12632	0.257775	1.07742	1.66101		0	0	0	0	0	0	0	0	0.0209964	0.0963599	0.831975	0.143491	0.0768464	0.151724	0.776516	0.170043	0.321598	0.39811	0.940708	0.54286	0.376286	0.54335	0.93776	0.602841	SMED30033691	uniq_sm_525018	033226_uniq	375	sm_525018	0	.	.	.	.	.	.	.	.	.
SMED30010356	0.0302211	0.112477	0.285617	-0.214477	-0.373619	-0.558276	-0.343855	-0.0326422	0.0302211		0	0	0	0	0	0	0	0	0.941954	0.784776	0.479075	0.617146	0.395526	0.209433	0.430865	0.937506	0.991256	0.931179	0.756097	0.891295	0.754183	0.612594	0.786263	0.985925	SMED30010356	AsxlX1_comp85926_c0_seq1	AsxlX1	417	SMEDS2F2_0000764	0	1	.	0	.	.	.	.	.	.
SMED30024181	0.0554134	0.0758908	0.03786	-0.0497689	0.242947	0.0844464	0.0968694	0.0597589	0.0554134		0	0	0	0	0	0	0	0	0.438199	0.288236	0.596066	0.489644	0.000655505	0.237312	0.176123	0.402642	0.852908	0.646722	0.834165	0.841742	0.0236241	0.645203	0.567075	0.795309	SMED30024181	AsxlX1_comp39998_c0_seq2	AsxlX1	940	SMEDS2F2_0000995	1	2	.	3	Q8R107	1e-27	PRELI domain-containing protein 1, mitochondrial	CDJ23405.1	5e-30	px19 protein [Echinococcus granulosus]
SMED30027921	-0.197629	0.112356	-0.0401905	-0.290559	-0.575625	-0.175738	-0.689793	-0.225601	-0.197629		0	0	0	0	0	0	0	0	0.626924	0.770921	0.918609	0.48609	0.193471	0.665722	0.12522	0.578776	0.917587	0.926275	0.973189	0.840154	0.573548	0.902876	0.487135	0.880091	SMED30027921	Sxlembryo_comp100419_c0_seq2	Sxlembryo	598	NA	NA	1	.	0	.	.	.	.	.	.
SMED30031596	0.205209	0.110196	0.174629	-0.213712	-0.655193	-0.383726	-0.491142	-0.978977	0.205209		0	0	0	0	0	0	0	0	0.696273	0.836845	0.739618	0.707676	0.29103	0.510889	0.413903	0.12541	0.942726	0.948917	0.902839	0.924397	0.672849	0.835817	0.77465	0.538257	SMED30031596	AsxlX1_comp110542_c0_seq1	AsxlX1	726	NA	NA	1	.	2	P26591	7e-13	Glutamate receptor	ESO92194.1	4e-17	hypothetical protein LOTGIDRAFT_233226 [Lottia gigantea]
SMED30024085	0.0395275	0.0974533	0.095109	0.16205	0.169498	0.0597607	0.0534877	0.0575516	0.0395275		0	0	0	0	0	0	0	0	0.538605	0.128437	0.136994	0.0114005	0.00831082	0.352628	0.40729	0.369429	0.893586	0.454693	0.418	0.139867	0.115189	0.742485	0.771593	0.778569	SMED30024085	Sxlembryo_comp85976_c0_seq5	Sxlembryo	2081	SMEDS2F2_0000374	0	1	.	0	.	.	.	CDJ18673.1	2e-10	zinc finger C2H2 type [Echinococcus granulosus]
SMED30021035	-0.0164872	-0.205526	-0.160892	0.0160212	-0.0116221	0.0196491	0.192874	-0.000195892	-0.0164872		0	0	0	0	0	0	0	0	0.902781	0.136711	0.239291	0.905769	0.932194	0.884081	0.146971	0.99883	0.98402	0.466855	0.552491	0.976201	0.983638	0.97247	0.525515	0.999829	SMED30021035	uniq_sm_542954	033226_uniq	1587	sm_542954	0	.	.	.	.	.	.	.	.	.
SMED30001659	0.0505755	-0.112511	-0.0527166	-0.0294422	0.127892	-0.100259	0.207074	0.334211	0.0505755		0	0	0	0	0	0	0	0	0.805635	0.592716	0.799364	0.888099	0.534791	0.633611	0.308777	0.0901368	0.969397	0.845234	0.92795	0.973593	0.839606	0.890944	0.703649	0.471582	SMED30001659	uniq_sm_215047	033226_uniq	554	sm_215047	0	.	.	.	.	.	.	.	.	.
SMED30027519	0.00605495	0.0146157	0.0239104	-0.0163011	0.0234864	-0.0160977	-0.0247193	-0.027687	0.00605495		0	0	0	0	0	0	0	0	0.91327	0.792619	0.666169	0.770465	0.674613	0.77275	0.658836	0.618752	0.985262	0.93415	0.865839	0.942855	0.902572	0.941429	0.897247	0.890181	SMED30027519	AsxlWT_comp51702_c0_seq2	AsxlWT	1312	SMEDS2F2_0000904	1	1	.	0	Q3ZBF3	1e-52	39S ribosomal protein L38, mitochondrial	GAA27542.2	4e-79	39S ribosomal protein L38 mitochondrial [Clonorchis sinensis]
SMED30001812	-0.347439	-0.435335	-0.0982024	-0.152365	-0.525338	-0.635964	-0.580391	0.203026	-0.347439		0	0	0	0	0	0	0	0	0.206446	0.119511	0.707797	0.570234	0.068984	0.0284211	0.0458237	0.414971	0.703885	0.440713	0.889033	0.873027	0.358241	0.254271	0.304909	0.802282	SMED30001812	uniq_sm_154482	033226_uniq	461	sm_154482	0	.	.	.	.	.	.	.	.	.
SMED30015807	0.0358293	-0.0322703	0.0877847	-0.367823	0.240944	0.17313	0.348237	0.153447	0.0358293		0	0	0	0	0	0	0	0	0.887879	0.899974	0.727108	0.172931	0.336814	0.489688	0.158656	0.538959	0.981429	0.969916	0.897342	0.587214	0.715757	0.823127	0.540865	0.863797	SMED30015807	Sxlembryo_comp100312_c0_seq1	Sxlembryo	2699	NA	NA	1	.	0	.	.	.	XP_002163593.2	5e-14	uncharacterized protein LOC100209012 [Hydra vulgaris]
SMED30028760	0.0121309	0.11794	0.164764	0.0643499	0.173677	0.135252	0.139432	0.0864543	0.0121309		0	0	0	0	0	0	0	0	0.876049	0.12633	0.031435	0.408138	0.0249642	0.0794316	0.0718253	0.262287	0.979172	0.451387	0.181413	0.794187	0.214619	0.417256	0.376839	0.697153	SMED30028760	OX_Smed_1.0.03290	Oxford	492	SMEDS2F2_0000788	1	1	.	0	Q9R1T1	2e-26	Barrier-to-autointegration factor	XP_008480229.1	4e-28	barrier-to-autointegration factor [Diaphorina citri]
SMED30001540	0.168218	0.201273	0.169629	0.113924	0.0756303	0.0415841	0.122835	0.0913717	0.168218		0	0	0	0	0	0	0	0	0.00704849	0.00124763	0.00649517	0.0695246	0.230512	0.508381	0.0505033	0.144441	0.191378	0.0281829	0.0651057	0.387283	0.616829	0.834716	0.318909	0.565074	SMED30001540	AsxlWT_comp27968_c0_seq1	AsxlWT	1700	SMEDS2F2_0000775	0	1	.	0	Q8R0N6	2e-175	Hydroxyacid-oxoacid transhydrogenase, mitochondrial	XP_008335662.1	5e-179	hydroxyacid-oxoacid transhydrogenase, mitochondrial isoform X2 [Cynoglossus semilaevis]
SMED30031458	0.0785519	0.072313	-0.0528283	-0.0425864	0.158772	0.0802434	0.00862271	0.0596105	0.0785519		0	0	0	0	0	0	0	0	0.15561	0.191661	0.342332	0.446193	0.00418083	0.147382	0.877196	0.281148	0.655104	0.544007	0.652724	0.81697	0.0767662	0.537062	0.969563	0.712843	SMED30031458	AsxlX1_comp75963_c0_seq3	AsxlX1	2244	SMEDS2F2_0001360	4	1	.	0	Q96M96	1e-12	FYVE, RhoGEF and PH domain-containing protein 4	XP_001945183.2	7e-14	FYVE, RhoGEF and PH domain-containing protein 6-like [Acyrthosiphon pisum]
SMED30032711	-0.217114	-0.0894336	-0.42734	-0.30045	-0.166316	-0.000607711	-0.170144	-0.18352	-0.217114		0	0	0	0	0	0	0	0	0.346946	0.696172	0.0671322	0.196565	0.472427	0.997868	0.461701	0.425714	0.804001	0.894781	0.283896	0.616582	0.806972	0.999399	0.804942	0.808217	SMED30032711	uniq_sm_rc_387477	033226_uniq	767	sm_rc_387477	0	.	.	.	Q6R2W3	3e-09	SCAN domain-containing protein 3	ABF20551.1	1e-21	transposase [Xenopus (Silurana) tropicalis]
SMED30003053	0.136073	0.166162	0.199024	0.146977	0.126924	0.0368786	0.128895	0.0776444	0.136073		0	0	0	0	0	0	0	0	0.0195	0.0043019	0.000596501	0.0118612	0.03045	0.52939	0.0276442	0.183593	0.312208	0.0664258	0.0120024	0.14318	0.239304	0.845399	0.235971	0.619302	SMED30003053	AsxlWT_comp42530_c0_seq1	AsxlWT	2345	SMEDS2F2_0001019	2	2	.	4	Q9NRZ7	6e-57	1-acyl-sn-glycerol-3-phosphate acyltransferase gamma	XP_005111448.1	3e-76	1-acyl-sn-glycerol-3-phosphate acyltransferase delta-like [Aplysia californica]
SMED30027131	-0.0681459	-1.11303	-0.969085	-1.06375	-0.157917	-1.12318	-1.08328	-1.31011	-0.0681459		0	0	0	0	0	0	0	0	0.911245	0.094564	0.137377	0.110489	0.798946	0.0916419	0.104139	0.0517598	0.985038	0.394073	0.418615	0.484897	0.943321	0.443596	0.449004	0.368881	SMED30027131	berlin_CUFF.134983.1	Berlin	483	smed27953	6	.	.	.	.	.	.	.	.	.
SMED30019419	0.432726	0.397912	0.526195	0.37176	0.158259	0.346961	0.199087	0.146579	0.432726		0	0	0	0	0	0	0	0	0.0377777	0.0575189	0.0103982	0.0781617	0.468146	0.099995	0.357439	0.495035	0.415559	0.306492	0.0885422	0.411665	0.804293	0.459365	0.743336	0.841553	SMED30019419	AsxlWT_comp32840_c0_seq1	AsxlWT	631	smed018082	7	1	.	2	.	.	.	.	.	.
SMED30002427	0.140341	0.171263	0.346282	0.340515	0.167878	0.145055	-0.0226286	-0.0496137	0.140341		0	0	0	0	0	0	0	0	0.165148	0.089819	0.000498162	0.00066984	0.099287	0.151989	0.826182	0.62828	0.667642	0.384659	0.010495	0.0172168	0.427939	0.543717	0.954101	0.89438	SMED30002427	SxlWT_comp38583_c0_seq1	SxlWT	949	JCR.NogginK	0	1	.	0	O93525	4e-12	Noggin	ACO06227.1	0	noggin-like protein 2 [Schmidtea mediterranea]
SMED30019254	-0.616355	-0.934298	-0.881732	-0.563155	-0.0685079	-0.345136	-0.252256	-0.3946	-0.616355		0	-1	-1	0	0	0	0	0	0.0216719	0.000878375	0.00146547	0.0361455	0.786866	0.184153	0.32949	0.128896	0.326089	0.0218601	0.0232654	0.277777	0.938866	0.583186	0.722401	0.543041	SMED30019254	dd_smedV4_30427_0_1	Dresden	512	NA	NA	1	.	0	P04323	2e-14	Retrovirus-related Pol polyprotein from transposon 17.6	XP_785151.3	6e-13	uncharacterized protein LOC579970 [Strongylocentrotus purpuratus]
SMED30024693	-0.173459	0.515476	-0.733797	0.0692699	-2.22608	-0.155695	0.598116	-0.729957	-0.173459		0	0	0	0	0	0	0	0	0.824376	0.471962	0.38421	0.928073	0.0379239	0.842321	0.404953	0.386853	0.971524	0.78061	0.6887	0.982816	0.268234	0.961824	0.770226	0.786947	SMED30024693	Sxlregen_comp10104_c0_seq2	Sxlregen	547	NA	NA	1	.	0	.	.	.	XP_005452420.1	4e-21	uncharacterized protein LOC102076765 isoform X1 [Oreochromis niloticus]
SMED30029252	-0.156642	-0.0708835	-0.0358812	-0.118044	-0.0407051	-0.104934	-0.0682962	-0.185584	-0.156642		0	0	0	0	0	0	0	0	0.343411	0.664076	0.823803	0.4763	0.805148	0.523669	0.679314	0.261558	0.803309	0.881377	0.937521	0.834768	0.946372	0.842976	0.906024	0.697133	SMED30029252	Sxlregen_comp24158_c1_seq2	Sxlregen	1559	SMEDS2F2_0003251	0	3	.	4	Q16478	1e-23	Glutamate receptor ionotropic, kainate 5	XP_002431269.1	1e-23	glutamate receptor, ionotropic kainate 2 precursor, putative [Pediculus humanus corporis]
SMED30018159	0.0563745	-0.0258495	-0.248811	-0.633848	-0.336135	-0.805617	-0.47447	0.329174	0.0563745		0	0	0	0	0	0	0	0	0.909983	0.959104	0.63103	0.256447	0.531707	0.158174	0.386084	0.489186	0.984795	0.990072	0.848259	0.679294	0.837445	0.55267	0.755828	0.838949	SMED30018159	Sxlembryo_comp44752_c0_seq1	Sxlembryo	550	NA	NA	1	.	0	.	.	.	.	.	.
SMED30009080	0.00224411	-0.438801	-0.0797754	-0.481524	-0.28186	-0.28912	-0.385385	-0.0210044	0.00224411		0	0	0	0	0	0	0	0	0.991751	0.0556777	0.713329	0.0383241	0.215394	0.198994	0.0939332	0.92235	0.998955	0.302287	0.890985	0.285645	0.599845	0.601308	0.428632	0.982631	SMED30009080	Sxlembryo_comp101641_c0_seq1	Sxlembryo	1241	SMEDS2F2_0000357	0	2	.	2	.	.	.	.	.	.
SMED30030059	0.0693105	0.084754	0.0894491	0.0194922	-0.0583699	0.00469426	-0.00968679	0.0377093	0.0693105		0	0	0	0	0	0	0	0	0.257074	0.165543	0.141845	0.752155	0.349491	0.939254	0.875807	0.537793	0.748758	0.510471	0.425284	0.939423	0.72354	0.986338	0.968971	0.863644	SMED30030059	AsxlWT_comp61544_c1_seq1	AsxlWT	3145	SMEDS2F2_0000084	3	1	YES	3	P19490	7e-179	Glutamate receptor 1	ESO90630.1	0	hypothetical protein LOTGIDRAFT_122838, partial [Lottia gigantea]
SMED30010860	0.765041	0.212885	0.0656638	0.272409	1.08622	0.359814	0.892014	1.12491	0.765041	1	0	0	0	0	1	0	1	1	0.0191607	0.534586	0.849829	0.426085	0.000743398	0.28799	0.00613163	0.000400704	0.30952	0.81744	0.946318	0.804588	0.0256523	0.692252	0.0992868	0.0194042	SMED30010860	AsxlWT_comp92694_c0_seq1	AsxlWT	496	sm_577898	0	1	YES	0	.	.	.	.	.	.
SMED30021743	0.348919	0.612145	0.338636	0.842632	0.627928	0.627748	0.531608	0.612312	0.348919		0	0	0	1	0	0	0	0	0.190023	0.0165862	0.201803	0.000682102	0.0151889	0.0140107	0.0423416	0.0159729	0.690805	0.15541	0.509552	0.0174722	0.165399	0.175476	0.295133	0.204592	SMED30021743	berlin_isotig26464	Berlin	590	isotig26464	0	.	.	.	.	.	.	.	.	.
SMED30024318	-0.718101	-0.710612	-0.746268	-0.674305	1.06425	0.220729	-0.114523	-0.454527	-0.718101		0	0	0	0	0	0	0	0	0.361312	0.36657	0.341921	0.392661	0.0737249	0.744367	0.874208	0.544139	0.814278	0.711749	0.652489	0.784612	0.36779	0.93037	0.96855	0.865244	SMED30024318	AsxlWT_comp2165271_c0_seq1	AsxlWT	303	NA	NA	1	.	0	.	.	.	.	.	.
SMED30021372	0.148394	0.067321	0.215066	0.0404526	0.0298472	0.0246837	0.0187684	0.134852	0.148394		0	0	0	0	0	0	0	0	0.066586	0.411149	0.00704966	0.624888	0.720565	0.764922	0.82176	0.0948818	0.510314	0.744924	0.0690048	0.893534	0.918342	0.938402	0.952789	0.484365	SMED30021372	AsxlWT_comp49334_c0_seq1	AsxlWT	928	SMEDS2F2_0000284	3	1	.	0	Q10711	2e-23	Endothelin-converting enzyme 2	XP_786072.2	3e-42	endothelin-converting enzyme 2-like [Strongylocentrotus purpuratus]
SMED30011210	0.408296	0.767451	0.275856	0.416738	0.637571	1.02341	0.530683	0.384842	0.408296		0	0	0	0	0	1	0	0	0.303675	0.0488095	0.489275	0.293974	0.106478	0.00807778	0.180123	0.332524	0.780935	0.28217	0.762999	0.713474	0.442291	0.129959	0.572928	0.753083	SMED30011210	uniq_smed008440	033226_uniq	620	smed008440	0	1	.	0	.	.	.	.	.	.
SMED30029648	0.997615	0.605138	0.0107802	-0.542853	1.09194	0.929074	0.275789	0.879605	0.997615		0	0	0	0	0	0	0	0	0.0757841	0.314105	0.986954	0.459507	0.0519907	0.103413	0.668245	0.123051	0.529826	0.669806	0.9961	0.82437	0.314663	0.465581	0.900785	0.53513	SMED30029648	Sxlregen_comp73521_c0_seq2	Sxlregen	313	NA	NA	1	.	0	.	.	.	.	.	.
SMED30025667	-0.021736	0.0647242	-0.0356796	-0.0354515	0.023077	0.0266684	-0.0120351	-0.0255253	-0.021736		0	0	0	0	0	0	0	0	0.634819	0.154508	0.434798	0.441372	0.616029	0.559152	0.793867	0.576339	0.920849	0.493037	0.728286	0.814209	0.87736	0.860329	0.943114	0.879345	SMED30025667	Sxlembryo_comp97286_c0_seq26	Sxlembryo	2003	SMEDS2F2_0001403	0	1	.	0	Q13042	1e-94	Cell division cycle protein 16 homolog	ESO83785.1	4e-113	hypothetical protein LOTGIDRAFT_132783 [Lottia gigantea]
SMED30003407	-0.541256	-0.846294	0.000791406	-0.806769	-0.311914	-0.832746	-0.329849	-0.145629	-0.541256		0	0	0	0	0	0	0	0	0.168687	0.0415836	0.998225	0.0524132	0.417928	0.0450624	0.391445	0.689978	0.670642	0.259431	0.999309	0.334676	0.771697	0.320953	0.759554	0.918991	SMED30003407	Sxlembryo_comp91383_c0_seq1	Sxlembryo	650	NA	NA	1	.	0	.	.	.	.	.	.
SMED30008965	0.0752352	0.0629831	0.0988878	0.016271	0.00721517	0.0286056	-0.0302808	-0.0713445	0.0752352		0	0	0	0	0	0	0	0	0.304605	0.391241	0.17512	0.826103	0.922852	0.698089	0.684652	0.335678	0.781535	0.731389	0.47629	0.957517	0.981268	0.915816	0.907885	0.753542	SMED30008965	AsxlWT_comp35146_c0_seq2	AsxlWT	1429	SMEDS2F2_0000940	0	1	.	0	Q5FVR4	3e-63	3'-5' exoribonuclease 1	CAX73696.1	5e-69	three prime histone mRNA exonuclease 1 [Schistosoma japonicum]
SMED30027186	-0.0592731	-0.191114	-0.152791	-0.118439	0.0101157	-0.0375597	-0.0665465	-0.0787822	-0.0592731		0	0	0	0	0	0	0	0	0.394125	0.00695547	0.0292506	0.0932901	0.884943	0.589278	0.344216	0.257009	0.83482	0.0916639	0.173803	0.447962	0.970897	0.870004	0.733303	0.694161	SMED30027186	AsxlWT_comp59747_c0_seq1	AsxlWT	2232	SMEDS2F2_0000476	3	1	.	0	Q5U2Y9	1e-17	Lebercilin	XP_006822670.1	5e-18	lebercilin-like [Saccoglossus kowalevskii]
SMED30002604	-0.187379	-0.129021	-0.0220726	-0.148351	-0.132587	-0.0876539	0.0478571	-0.0166522	-0.187379		0	0	0	0	0	0	0	0	0.148068	0.316774	0.861979	0.253095	0.308684	0.495241	0.707492	0.895695	0.646394	0.672045	0.951133	0.675688	0.69081	0.826912	0.914839	0.97631	SMED30002604	AsxlWT_comp45638_c0_seq1	AsxlWT	727	SMEDS2F2_0001641	0	1	.	0	P41041	2e-21	Calmodulin	ETE66325.1	6e-21	Calmodulin, partial [Ophiophagus hannah]
SMED30026265	0.0166303	-0.0394366	-0.10423	-0.0592284	-0.0102933	-0.021699	-0.0239883	-0.0652818	0.0166303		0	0	0	0	0	0	0	0	0.819153	0.591	0.156718	0.423607	0.889438	0.767321	0.745609	0.372913	0.971107	0.844189	0.449112	0.803712	0.972638	0.939122	0.929024	0.780729	SMED30026265	Sxlembryo_comp95301_c0_seq1	Sxlembryo	3447	SMEDS2F2_0001580	0	2	.	0	Q9BRR8	5e-18	G patch domain-containing protein 1	XP_002164808.2	1e-21	G patch domain-containing protein 1-like, partial [Hydra vulgaris]
SMED30034295	-0.19735	-0.136463	-0.0887377	-0.0908679	-0.185533	-0.147533	-0.247449	-0.11414	-0.19735		0	0	0	0	0	0	0	0	0.000443562	0.0144249	0.107142	0.103236	0.00112312	0.00839399	1.55763e-05	0.0390854	0.0350425	0.143508	0.365639	0.469866	0.0335493	0.132979	0.00152816	0.323572	SMED30034295	dd_smedV4_8287_0_1	Dresden	1597	SMEDS2F2_0001939	1	1	.	0	Q8R3P7	2e-103	Clusterin-associated protein 1	EKC32057.1	3e-114	Clusterin-associated protein 1 [Crassostrea gigas]
SMED30031675	-0.156347	-0.197416	-0.0544788	0.317024	-0.112466	-0.390986	-0.279337	-0.16232	-0.156347		0	0	0	0	0	0	0	0	0.548653	0.452312	0.830975	0.19474	0.669046	0.149748	0.299691	0.531984	0.898485	0.765609	0.940413	0.614823	0.900694	0.540659	0.694589	0.861604	SMED30031675	dd_smedV4_32935_0_1	Dresden	947	SMEDS2F2_0001403	3	1	.	0	.	.	.	.	.	.
SMED30006338	-0.0379717	-0.495583	-0.158739	0.365748	0.0626552	0.113122	0.168109	-0.110518	-0.0379717		0	0	0	0	0	0	0	0	0.915013	0.196307	0.65972	0.276371	0.860306	0.74523	0.629407	0.757531	0.985564	0.548365	0.862795	0.699462	0.963552	0.930641	0.884162	0.941262	SMED30006338	uniq_sm_507372	033226_uniq	358	sm_507372	0	.	.	.	.	.	.	.	.	.
SMED30018561	0.785095	0.586144	0.535031	0.260612	0.335282	0.533041	0.448654	0.54954	0.785095	3	1	1	1	0	0	1	0	1	4.43052e-07	0.000162947	0.000575359	0.0943133	0.0314058	0.000606856	0.0039393	0.000406536	0.000152884	0.00597294	0.011773	0.449997	0.243457	0.025516	0.0748473	0.0194651	SMED30018561	AsxlWT_comp57605_c1_seq2	AsxlWT	1262	SMEDS2F2_0001937	8	1	.	0	Q8L5Y9	7e-11	Pantothenate kinase 2	XP_002525366.1	2e-12	Pantothenate kinase, putative [Ricinus communis]
SMED30024190	0.0896357	0.0945102	0.0339424	0.0664907	0.162729	0.0826358	0.0596127	0.0443172	0.0896357		0	0	0	0	0	0	0	0	0.0868398	0.0710651	0.517009	0.205217	0.00191091	0.114748	0.256439	0.39761	0.550584	0.34157	0.781527	0.626967	0.0474897	0.485395	0.656592	0.794417	SMED30024190	AsxlWT_comp51264_c0_seq1	AsxlWT	2617	SMEDS2F2_0000113	4	1	.	0	A8X6H1	0	cGMP-dependent protein kinase egl-4	ESO87373.1	0	hypothetical protein LOTGIDRAFT_127769 [Lottia gigantea]
SMED30028148	0.196207	-0.166146	0.165922	0.778362	-0.0592375	1.43338	1.18054	-0.171877	0.196207		0	0	0	0	0	0	0	0	0.844723	0.873197	0.868209	0.408622	0.952239	0.101132	0.190757	0.866391	0.97515	0.961043	0.953361	0.794511	0.988303	0.462187	0.585765	0.968872	SMED30028148	uniq_rc_smed27790	033226_uniq	708	rc_smed27790	0	1	.	0	.	.	.	.	.	.
SMED30015080	-0.233067	-0.612381	-1.17896	-0.816411	-1.06417	-0.0513622	-0.789427	-0.646646	-0.233067		0	0	0	0	0	0	0	0	0.712238	0.363885	0.1086	0.245926	0.150843	0.93349	0.262636	0.336867	0.949194	0.709854	0.368578	0.667333	0.513034	0.985282	0.662734	0.754422	SMED30015080	Sxlregen_comp51238_c0_seq1	Sxlregen	3502	smed007107	15	.	.	.	.	.	.	.	.	.
SMED30028817	0.205075	0.245288	-0.0494292	0.201413	0.309299	0.381787	0.26194	0.376898	0.205075		0	0	0	0	0	0	0	0	0.19918	0.123237	0.761555	0.209402	0.0529788	0.0153985	0.101597	0.0164841	0.695879	0.446607	0.912753	0.632034	0.317177	0.184764	0.444749	0.208542	SMED30028817	AsxlX1_comp80186_c0_seq4	AsxlX1	3021	isotig22180	0	1	.	0	Q00940	0.0007	Peroxisome biogenesis factor 10	.	.	.
SMED30012404	-0.205766	-0.17719	-0.502217	0.0322427	-0.0116109	0.0230204	-0.0876123	-0.0455733	-0.205766		0	0	0	0	0	0	0	0	0.362476	0.431381	0.0336851	0.882844	0.958373	0.915917	0.696541	0.83486	0.814578	0.754204	0.188985	0.972975	0.989629	0.981771	0.911949	0.961982	SMED30012404	AsxlX1_comp78891_c1_seq3	AsxlX1	1737	sm_465931	3	1	.	0	Q7LHG5	2e-08	Transposon Ty3-I Gag-Pol polyprotein	GAA49140.1	6e-19	transposon Ty3-G gap-Pol polyprotein [Clonorchis sinensis]
SMED30008397	-0.169968	-0.0284859	0.112956	0.0883975	0.00381629	0.0410069	0.0677613	0.121989	-0.169968		0	0	0	0	0	0	0	0	0.0685635	0.755738	0.205493	0.329215	0.967051	0.651649	0.457717	0.171292	0.514756	0.921154	0.513886	0.744006	0.992321	0.897936	0.803595	0.60463	SMED30008397	AsxlX1_comp72631_c0_seq4	AsxlX1	2613	SMEDS2F2_0000011	4	1	.	1	Q5XPT3	0	Glycosyltransferase-like protein LARGE2	XP_004708486.1	0	glycosyltransferase-like protein LARGE2 [Echinops telfairi]
SMED30023787	0.204648	-0.294424	-1.40881	0.251984	0.298288	-0.136667	-0.569825	0.376314	0.204648		0	0	0	0	0	0	0	0	0.70676	0.619553	0.046881	0.643491	0.584121	0.813366	0.365822	0.474033	0.947359	0.859139	0.232761	0.900624	0.862907	0.953662	0.743528	0.830527	SMED30023787	berlin_isotig23730	Berlin	424	NA	NA	.	.	.	.	.	.	.	.	.
SMED30027074	0.177198	0.0688387	-0.292674	0.564273	0.0716479	0.407715	0.167928	0.404145	0.177198		0	0	0	0	0	0	0	0	0.443115	0.767558	0.221561	0.012468	0.760442	0.0733776	0.470444	0.0750205	0.853234	0.925555	0.531405	0.147829	0.933101	0.403933	0.809537	0.439109	SMED30027074	berlin_CUFF.56969.1	Berlin	773	NA	NA	1	.	0	.	.	.	.	.	.
SMED30013675	-0.0088804	-0.0175764	-0.0508513	-0.0891921	-0.0352694	-0.0269828	0.0998606	0.0422759	-0.0088804		0	0	0	0	0	0	0	0	0.887545	0.779733	0.41825	0.157563	0.576291	0.667846	0.111485	0.499917	0.981429	0.929038	0.715948	0.564298	0.860652	0.90317	0.462534	0.843952	SMED30013675	SxlWT_comp66377_c0_seq9	SxlWT	2764	SMEDS2F2_0000596	0	1	YES	2	B2RXS4	1e-47	Plexin-B2	XP_005039319.1	3e-51	plexin-B2 isoform X3 [Ficedula albicollis]
SMED30030546	0.149599	0.04096	0.481954	0.244019	-0.0164569	0.419871	0.25927	0.103583	0.149599		0	0	0	0	0	0	0	0	0.488862	0.852594	0.017742	0.255302	0.942039	0.0428005	0.228092	0.632632	0.873864	0.954747	0.126606	0.678332	0.986497	0.312327	0.627698	0.896089	SMED30030546	OX_Smed_1.0.14254	Oxford	1075	NA	NA	.	.	.	.	.	.	.	.	.
SMED30035315	0.012824	-0.126858	-0.15608	-0.0514549	0.0147487	-0.0450844	-0.0898745	-0.0141944	0.012824		0	0	0	0	0	0	0	0	0.825847	0.0305866	0.00776996	0.379816	0.801127	0.440764	0.126098	0.807649	0.971889	0.219083	0.0731458	0.779975	0.943843	0.795825	0.489105	0.955702	SMED30035315	AsxlWT_comp57878_c0_seq2	AsxlWT	2788	SMEDS2F2_0002508	1	1	.	1	O60344	6e-146	Endothelin-converting enzyme 2	XP_002130786.2	3e-153	endothelin-converting enzyme 2 [Ciona intestinalis]
SMED30023421	-0.172211	-0.310364	-0.351707	-0.234258	-0.061688	-0.118255	-0.00369522	0.0999638	-0.172211		0	0	0	0	0	0	0	0	0.464705	0.196213	0.142832	0.327522	0.793338	0.614276	0.987383	0.659814	0.86263	0.548362	0.426535	0.742399	0.941226	0.882028	0.997088	0.907875	SMED30023421	berlin_CUFF.231467.1	Berlin	431	NA	NA	.	.	.	.	.	.	.	.	.
SMED30006057	0.0985955	-0.0577146	-0.110566	-0.256496	-0.0758246	-0.0419306	-0.0747207	-0.181448	0.0985955		0	0	0	0	0	0	0	0	0.469315	0.678113	0.427022	0.0738795	0.591082	0.762852	0.595145	0.196796	0.86464	0.887491	0.72233	0.398838	0.865898	0.937085	0.868968	0.63445	SMED30006057	OX_Smed_1.0.08929	Oxford	2283	SMEDS2F2_0000191	0	.	.	.	.	.	.	.	.	.
SMED30024606	0.331032	-0.42064	0.0465584	-0.014439	-0.170767	0.22573	0.00992472	-0.88406	0.331032		0	0	0	0	0	0	0	0	0.636638	0.581745	0.948587	0.983842	0.820631	0.75047	0.9895	0.272569	0.922144	0.839549	0.983951	0.997073	0.95195	0.932604	0.997407	0.706827	SMED30024606	Sxlembryo_comp114330_c0_seq1	Sxlembryo	545	NA	NA	1	.	1	.	.	.	.	.	.
SMED30015475	-0.0427202	-0.0133155	-0.162777	-0.0367129	0.341891	0.269331	0.0983659	-0.136937	-0.0427202		0	0	0	0	0	0	0	0	0.861706	0.956559	0.512842	0.881914	0.14399	0.24943	0.685486	0.580606	0.977674	0.989163	0.778772	0.972973	0.503932	0.658527	0.907885	0.880953	SMED30015475	AsxlX1_comp84010_c0_seq10	AsxlX1	644	NA	NA	1	.	0	.	.	.	.	.	.
SMED30005781	-0.0245167	-0.0381421	0.0370627	-0.0754968	-0.12279	-0.136097	-0.0172604	-0.121058	-0.0245167		0	0	0	0	0	0	0	0	0.718141	0.574864	0.5838	0.268662	0.0735017	0.0463855	0.800011	0.0757056	0.950754	0.838103	0.827834	0.691185	0.367727	0.325512	0.946285	0.440884	SMED30005781	AsxlWT_comp59380_c1_seq2	AsxlWT	1380	SMEDS2F2_0000675	5	1	.	7	Q9VCY8	3e-106	Adiponectin receptor protein [Drosophila melanogaster]	XP_005097206.1	9e-128	ADIPOR-like receptor CG5315-like [Aplysia californica]
SMED30036006	0.144429	0.244473	0.260281	0.377827	0.388574	0.192454	0.214192	0.157407	0.144429		0	0	0	0	0	0	0	0	0.0905658	0.00390705	0.00202067	7.07669e-06	4.22088e-06	0.0238156	0.0121582	0.0643626	0.558046	0.0621916	0.0293197	0.000374567	0.000618122	0.232964	0.15221	0.409543	SMED30036006	AsxlX1_comp83308_c0_seq9	AsxlX1	1392	SMEDS2F2_0001551	17	1	.	1	Q09324	8e-54	Beta-1,3-galactosyl-O-glycosyl-glycoprotein beta-1,6-N-acetylglucosaminyltransferase	ESO94014.1	1e-87	hypothetical protein LOTGIDRAFT_104647 [Lottia gigantea]
SMED30007545	0.0296576	0.0385273	0.0499524	0.0702759	0.00498583	0.0131408	0.0705834	0.0426726	0.0296576		0	0	0	0	0	0	0	0	0.646155	0.550965	0.437589	0.277185	0.939136	0.839253	0.275984	0.507715	0.924029	0.826984	0.730557	0.700394	0.986175	0.960989	0.673985	0.848528	SMED30007545	Sxlembryo_comp97741_c0_seq18	Sxlembryo	2473	SMEDS2F2_0000577	0	1	.	9	Q91YT8	9e-74	Transmembrane protein 63A [Mus musculus]	KDR13287.1	3e-92	hypothetical protein L798_12217 [Zootermopsis nevadensis]
SMED30024453	-0.589079	-0.472901	-0.185095	-0.59836	-0.809074	-0.217372	0.00591628	-0.733269	-0.589079		0	0	0	0	0	0	0	0	0.106173	0.186861	0.585691	0.10451	0.0356887	0.528155	0.986041	0.04839	0.585456	0.537288	0.828802	0.472585	0.25892	0.844469	0.996633	0.358383	SMED30024453	AsxlX1_comp56516_c0_seq1	AsxlX1	1403	SMEDS2F2_0002850	1	1	.	7	P11483	5e-80	Muscarinic acetylcholine receptor M3	XP_007467644.1	2e-78	muscarinic acetylcholine receptor M3-like [Lipotes vexillifer]
SMED30000255	-0.509403	-0.724066	-0.249348	-0.937829	-0.593167	-0.262448	-0.43144	-0.21168	-0.509403		0	0	0	0	0	0	0	0	0.13572	0.0399079	0.446699	0.010496	0.0909078	0.427766	0.206992	0.516588	0.632977	0.253343	0.737955	0.13227	0.409105	0.788761	0.605663	0.853286	SMED30000255	uniq_sm_549129	033226_uniq	422	sm_549129	0	.	.	.	.	.	.	.	.	.
SMED30009374	-0.678931	-0.396651	-0.357961	-0.687504	-0.349391	-0.36353	-0.398054	-0.19465	-0.678931		0	0	0	0	0	0	0	0	0.0205382	0.164624	0.205992	0.0199475	0.223083	0.201985	0.166218	0.485747	0.318795	0.508872	0.514326	0.197769	0.608231	0.604385	0.553772	0.836678	SMED30009374	Sxlregen_comp44292_c0_seq1	Sxlregen	1347	NA	NA	1	.	0	.	.	.	.	.	.
SMED30025902	-0.117043	-0.193909	-0.249119	-0.149726	-0.149452	-0.0693619	-0.149906	-0.0926518	-0.117043		0	0	0	0	0	0	0	0	0.0670156	0.00249211	0.000103161	0.0195431	0.0199999	0.277288	0.0194958	0.146431	0.51116	0.0457867	0.00317641	0.195764	0.191215	0.682762	0.198223	0.568367	SMED30025902	SxlWT_comp65702_c0_seq2	SxlWT	5948	SMEDS2F2_0001651	0	1	.	0	Q9R095	8e-112	Sperm flagellar protein 2	XP_005100479.1	1e-134	sperm flagellar protein 2-like isoform X4 [Aplysia californica]
SMED30031516	0.346652	-0.33524	0.177952	-0.540482	-1.15112	-0.114085	-0.803053	-0.611693	0.346652		0	0	0	0	0	0	0	0	0.604868	0.651036	0.794983	0.482846	0.177513	0.873703	0.319112	0.425456	0.911184	0.874772	0.926054	0.838522	0.552011	0.969773	0.713555	0.807985	SMED30031516	uniq_sm_rc_562996	033226_uniq	309	sm_rc_562996	0	.	.	.	.	.	.	.	.	.
SMED30020909	0.539005	-0.00083222	-0.929124	0.036873	0.470117	0.704733	0.27158	0.656092	0.539005		0	0	0	0	0	0	0	0	0.426343	0.999103	0.277006	0.960408	0.500224	0.286926	0.705405	0.321163	0.849689	0.999667	0.590623	0.991241	0.82116	0.691069	0.913698	0.741998	SMED30020909	Sxlembryo_comp97869_c0_seq4	Sxlembryo	577	NA	NA	1	.	0	.	.	.	.	.	.
SMED30007670	-0.138819	-0.107292	-0.0608211	0.0438069	-0.175959	-0.0498584	-0.0758439	0.0388599	-0.138819		0	0	0	0	0	0	0	0	0.0712409	0.162347	0.424533	0.564645	0.0242133	0.514417	0.325249	0.606986	0.521902	0.504872	0.720743	0.871646	0.211418	0.837014	0.717522	0.888758	SMED30007670	AsxlX1_comp70717_c0_seq1	AsxlX1	3681	SMEDS2F2_0002270	0	1	.	0	O60941	2e-98	Dystrobrevin beta	ABD93929.1	4e-112	dystrobrevin [Schistosoma mansoni]
SMED30001064	0.0592169	0.062675	0.158971	-0.0746758	-0.0323223	-0.0547987	-0.0619071	0.0789508	0.0592169		0	0	0	0	0	0	0	0	0.473192	0.448163	0.0487596	0.381325	0.705186	0.517016	0.46945	0.33475	0.867833	0.762961	0.237539	0.780584	0.912328	0.838112	0.809297	0.753542	SMED30001064	AsxlX1_comp81063_c0_seq3	AsxlX1	589	smed010078	1	1	.	0	P40798	0.0004	Protein shuttle craft [Drosophila melanogaster]	EIE88124.1	1e-05	hypothetical protein RO3G_12835 [Rhizopus delemar RA 99-880]
SMED30006750	-0.560588	0.0700915	0.0327636	-0.70532	-0.925842	-0.0480003	0.256658	-0.257053	-0.560588		0	0	0	0	0	0	0	0	0.453267	0.918754	0.961564	0.358497	0.244242	0.946421	0.707185	0.720793	0.855933	0.975695	0.98784	0.764704	0.628092	0.987989	0.91463	0.929991	SMED30006750	berlin_isotig13815	Berlin	340	isotig13814	5	1	.	0	.	.	.	.	.	.
SMED30008738	0.116493	0.0377583	0.0653692	0.0259027	0.241478	0.0552768	0.0873009	-0.0330676	0.116493		0	0	0	0	0	0	0	0	0.195274	0.676992	0.468026	0.7763	0.00718921	0.541847	0.336516	0.716116	0.692927	0.887295	0.751409	0.944159	0.106295	0.851438	0.72722	0.928811	SMED30008738	AsxlWT_comp27659_c0_seq1	AsxlWT	573	SMEDS2F2_0002337	1	1	.	0	Q3SZB5	1e-09	Coiled-coil domain-containing protein 115	CCD76143.1	4e-12	hypothetical protein Smp_048420 [Schistosoma mansoni]
SMED30030566	0.101348	0.130289	0.087522	-0.0113836	0.0834356	-0.0395238	0.167113	0.175523	0.101348		0	0	0	0	0	0	0	0	0.12776	0.0498913	0.187785	0.866118	0.214927	0.558105	0.012137	0.00783848	0.615709	0.285479	0.491671	0.968646	0.599825	0.859753	0.152048	0.137775	SMED30030566	AsxlWT_comp53714_c0_seq1	AsxlWT	1572	SMEDS2F2_0000541	0	1	.	0	Q99J78	6e-19	Differentially expressed in FDCP 8	GAA53734.1	2e-25	pleckstrin homology domain-containing family M member 3 [Clonorchis sinensis]
SMED30022334	0.299497	0.393687	0.985969	0.601989	-0.654616	0.122371	0.55099	0.742836	0.299497		0	0	0	0	0	0	0	0	0.580396	0.461178	0.0425811	0.248234	0.307531	0.826686	0.296573	0.140792	0.907128	0.772119	0.219681	0.669706	0.689808	0.957454	0.692234	0.561013	SMED30022334	Sxlembryo_comp91844_c0_seq1	Sxlembryo	857	NA	NA	1	.	0	.	.	.	XP_004205921.1	9e-09	uncharacterized protein LOC101239151 [Hydra vulgaris]
SMED30011053	0.0917779	0.0219863	-0.0120543	-0.0931453	0.0477333	-0.06227	-0.03509	-0.172298	0.0917779		0	0	0	0	0	0	0	0	0.131276	0.718532	0.843286	0.129234	0.435514	0.309147	0.567096	0.00501902	0.623189	0.906579	0.943898	0.521537	0.781084	0.709986	0.85513	0.105074	SMED30011053	Asxlregen_comp60223_c0_seq1	Asxlregen	970	SMEDS2F2_0001582	2	1	.	0	Q94920	2e-13	Voltage-dependent anion-selective channel	XP_001842637.1	2e-15	voltage-dependent anion-selective channel [Culex quinquefasciatus]
SMED30032950	0.0589617	-0.0943741	-0.0638487	-0.045546	-0.0915492	-0.290136	-0.153852	-0.202012	0.0589617		0	0	0	0	0	0	0	0	0.488798	0.275504	0.457344	0.598791	0.294792	0.00102777	0.079273	0.0204815	0.873864	0.633981	0.743182	0.884443	0.676344	0.0367318	0.395128	0.232819	SMED30032950	SxlWT_comp65169_c0_seq1	SxlWT	1434	SMEDS2F2_0002074	20	1	.	0	Q1LXC9	5e-43	Integrator complex subunit 3	CCD60425.1	1e-57	hypothetical protein Smp_169520 [Schistosoma mansoni]
SMED30003890	-0.0480659	-0.0355449	-0.033293	-0.0701376	-0.0495508	0.0134787	-0.0105557	-0.0376896	-0.0480659		0	0	0	0	0	0	0	0	0.530661	0.642866	0.662774	0.363854	0.522543	0.859962	0.890932	0.621875	0.889358	0.870032	0.864042	0.769615	0.831818	0.9661	0.97342	0.891595	SMED30003890	AsxlWT_comp58947_c0_seq2	AsxlWT	1302	SMEDS2F2_0000843	1	1	.	0	Q5BL56	0.0001	HMG box-containing protein 4	CDJ09274.1	5e-14	26S proteasome non ATPase regulatory subunit [Hymenolepis microstoma]
SMED30007675	0.0937018	0.0630374	0.14184	-0.0100959	-0.30332	-0.395537	-0.100384	-0.0815264	0.0937018		0	0	0	0	0	0	0	0	0.41724	0.587441	0.214425	0.931879	0.0145518	0.00145356	0.40321	0.489398	0.846713	0.842188	0.523259	0.982986	0.161878	0.0454083	0.769144	0.839077	SMED30007675	AsxlWT_comp52243_c0_seq1	AsxlWT	809	SMEDS2F2_0000570	4	1	.	0	A4IHY1	5e-06	Proteasome assembly chaperone 1	EKC42394.1	1e-11	Proteasome assembly chaperone 1 [Crassostrea gigas]
SMED30015953	-0.266733	-0.499431	-0.298172	-0.401903	-0.631736	-0.400703	0.101008	-0.222973	-0.266733		0	0	0	0	0	0	0	0	0.277325	0.051247	0.224357	0.113376	0.017954	0.112486	0.665394	0.357523	0.762363	0.288917	0.534601	0.489207	0.180249	0.481762	0.899878	0.770492	SMED30015953	Asxlsort_comp74379_c0_seq1	Asxlsort	959	NA	NA	1	.	0	.	.	.	.	.	.
SMED30013168	-0.0518414	-0.0449504	0.0419665	0.0810311	-0.0416104	-0.160647	-0.181258	-0.0956389	-0.0518414		0	0	0	0	0	0	0	0	0.306287	0.375147	0.405649	0.108967	0.413377	0.00160294	0.00038574	0.0593604	0.782369	0.719865	0.70585	0.481324	0.76796	0.0476384	0.0157341	0.395048	SMED30013168	AsxlWT_comp55655_c0_seq3	AsxlWT	2391	SMEDS2F2_0001720	11	1	.	0	P27730	0	Calpain	CAX73441.1	0	Calpain B [Schistosoma japonicum]
SMED30002355	0.0397367	0.0559004	0.042581	-0.01633	-0.00196572	0.0440005	0.056092	-0.0178908	0.0397367		0	0	0	0	0	0	0	0	0.409126	0.245522	0.376117	0.734969	0.967524	0.36084	0.244456	0.710352	0.841661	0.604165	0.68354	0.932211	0.992368	0.748119	0.645275	0.926228	SMED30002355	AsxlWT_comp56614_c0_seq2	AsxlWT	1730	SMEDS2F2_0000420	3	1	YES	0	Q61166	8e-88	Microtubule-associated protein RP/EB family member 1	XP_005958946.1	8e-87	microtubule-associated protein RP/EB family member 1 isoform X1 [Pantholops hodgsonii]
SMED30027418	-0.0811133	-0.179527	-0.0998078	-0.157604	-0.219284	-0.333389	-0.216478	-0.181304	-0.0811133		0	0	0	0	0	0	0	0	0.509986	0.150537	0.416659	0.208641	0.0846561	0.00908405	0.0878021	0.144617	0.882895	0.4875	0.715345	0.63122	0.395149	0.138688	0.414321	0.565231	SMED30027418	AsxlX1_comp36783_c0_seq1	AsxlX1	489	NA	NA	1	.	0	.	.	.	.	.	.
SMED30027776	-0.173863	0.161186	-0.100835	-0.497301	-0.0214021	0.578171	0.0110109	0.40355	-0.173863		0	0	0	0	0	0	0	0	0.616862	0.62826	0.7685	0.174663	0.950825	0.0677836	0.97437	0.210316	0.915368	0.863717	0.914541	0.589349	0.988048	0.389983	0.993631	0.651103	SMED30027776	Sxlembryo_comp100686_c1_seq3	Sxlembryo	2328	NA	NA	2	.	0	.	.	.	XP_002170700.2	3e-49	uncharacterized protein LOC100197942 [Hydra vulgaris]
SMED30032666	-0.13481	-0.10952	-0.196931	-0.126883	-0.0786534	-0.011174	-0.206225	-0.178863	-0.13481		0	0	0	0	0	0	0	0	0.112286	0.196262	0.0207088	0.136795	0.356788	0.894339	0.0166411	0.03542	0.59662	0.548365	0.139959	0.535044	0.728203	0.975815	0.182446	0.31009	SMED30032666	AsxlX1_comp75957_c0_seq2	AsxlX1	1774	SMEDS2F2_0002082	2	1	.	0	.	.	.	XP_006028267.1	1e-10	spermatogenesis-associated protein 7 homolog [Alligator sinensis]
SMED30034233	0.198167	-0.154089	-0.50443	-0.313652	0.123956	0.116495	-0.261618	0.0931391	0.198167		0	0	0	0	0	0	0	0	0.391563	0.526443	0.0472866	0.210657	0.600987	0.619626	0.294947	0.690211	0.834347	0.813731	0.233781	0.633378	0.869296	0.884538	0.691596	0.918991	SMED30034233	OX_Smed_1.0.12136	Oxford	613	NA	NA	.	.	.	.	.	.	.	.	.
SMED30032165	0.211348	-0.136836	-0.0725865	0.238965	-0.190604	-0.421629	-0.468992	-0.40723	0.211348		0	0	0	0	0	0	0	0	0.39025	0.601368	0.777651	0.333325	0.478532	0.126748	0.0957536	0.135357	0.833179	0.849744	0.918509	0.747443	0.809716	0.504682	0.433055	0.554123	SMED30032165	berlin_CUFF.90356.1	Berlin	416	NA	NA	.	.	.	.	.	.	.	.	.
SMED30029875	-0.103876	-0.153973	-0.259154	-0.208758	-0.298314	-0.231207	-0.218705	-0.194793	-0.103876		0	0	0	0	0	0	0	0	0.455487	0.270642	0.0649569	0.138155	0.0358752	0.100252	0.121336	0.163678	0.85628	0.628693	0.279161	0.537015	0.259508	0.459643	0.480053	0.594833	SMED30029875	AsxlX1_comp82387_c0_seq1	AsxlX1	1009	SMEDS2F2_0000687	2	2	.	1	.	.	.	.	.	.
SMED30014228	-0.0818729	-0.11064	-0.0220163	0.119113	0.0306814	-0.141662	-0.275378	-0.0874558	-0.0818729		0	0	0	0	0	0	0	0	0.40031	0.258305	0.818771	0.211661	0.752455	0.150369	0.00656338	0.367337	0.837604	0.617453	0.935044	0.634011	0.929989	0.54134	0.103674	0.777045	SMED30014228	AsxlWT_comp58849_c0_seq2	AsxlWT	1222	SMEDS2F2_0000788	1	1	.	0	.	.	.	ABA40385.1	1e-08	SJCHGC07397 protein [Schistosoma japonicum]
SMED30021108	-0.0403486	0.21957	-0.0716945	-0.263007	0.0281537	-0.0742101	-0.137467	0.0114757	-0.0403486		0	0	0	0	0	0	0	0	0.880775	0.393661	0.789766	0.351668	0.917165	0.784794	0.620684	0.965482	0.980177	0.733498	0.923927	0.759144	0.979152	0.944398	0.880831	0.99163	SMED30021108	SxlWT_comp17653_c0_seq1	SxlWT	1667	smed007516	0	1	.	0	P31364	2e-62	POU domain, class 3, transcription factor 4-A	BAA02309.1	2e-67	DjPOU2 [Dugesia japonica]
SMED30007172	0.212659	0.299371	0.151714	0.129659	0.200162	0.311302	0.207723	0.247369	0.212659		0	0	0	0	0	0	0	0	0.052948	0.00606309	0.168484	0.24403	0.0717662	0.00433611	0.0607389	0.023643	0.470247	0.0836104	0.46628	0.6667	0.364612	0.0889559	0.349433	0.252122	SMED30007172	Sxlregen_comp10808_c0_seq1	Sxlregen	947	SMEDS2F2_0000971	1	1	.	0	Q810V0	4e-07	U3 small nucleolar ribonucleoprotein protein MPP10	GAA30609.2	2e-12	U3 small nucleolar RNA-associated protein MPP10, partial [Clonorchis sinensis]
SMED30004419	-0.899886	-0.527867	-1.4122	-0.995816	-0.799246	0.15918	-0.00264693	0.0390571	-0.899886		0	0	0	0	0	0	0	0	0.103733	0.313689	0.0175999	0.078837	0.149978	0.737485	0.995857	0.934882	0.581474	0.669806	0.125892	0.413471	0.513034	0.928552	0.998783	0.985084	SMED30004419	uniq_smed013017	033226_uniq	373	smed013017	0	1	.	1	.	.	.	.	.	.
SMED30028538	-0.247587	-0.349914	-0.278306	-0.199834	-1.21246	-0.733347	-0.841051	-1.32917	-0.247587		0	0	0	0	0	0	0	0	0.628274	0.501908	0.585997	0.696324	0.0481381	0.188196	0.14283	0.0291464	0.917798	0.79957	0.828937	0.920744	0.303987	0.588341	0.518714	0.28036	SMED30028538	Sxlregen_comp77202_c0_seq1	Sxlregen	1510	smed020840	1	2	.	0	.	.	.	.	.	.
SMED30004058	-0.220326	0.28753	-1.02075	0.0138239	-1.08067	-0.102423	-0.479297	-0.857565	-0.220326		0	0	0	0	0	0	0	0	0.653339	0.523005	0.0678165	0.976807	0.0624624	0.831979	0.357527	0.11493	0.926344	0.812007	0.285426	0.994733	0.343348	0.959259	0.743336	0.522537	SMED30004058	uniq_SMEDS2F2_00012508-RA	033226_uniq	297	SMEDS2F2_0001250	0	1	.	0	.	.	.	.	.	.
SMED30013865	-0.0967396	-0.286076	-0.376054	-0.19159	-0.139429	-0.12055	-0.257005	-0.264762	-0.0967396		0	0	0	0	0	0	0	0	0.341195	0.00546393	0.000273091	0.0619461	0.174478	0.237014	0.0128092	0.00985269	0.802583	0.0782225	0.00671115	0.363859	0.547924	0.644862	0.157175	0.156336	SMED30013865	AsxlWT_comp60403_c0_seq1	AsxlWT	2784	SMEDS2F2_0002326	3	1	.	0	O75665	2e-31	Oral-facial-digital syndrome 1 protein	AFB74720.1	6e-127	OFD1, partial [Schmidtea mediterranea]
SMED30021767	0.0203661	-0.044146	0.0567895	0.100443	0.0251909	-0.0133221	-0.0070322	-0.0236459	0.0203661		0	0	0	0	0	0	0	0	0.722633	0.443829	0.32034	0.0796035	0.662855	0.817041	0.903131	0.680742	0.951599	0.760426	0.632151	0.415442	0.898563	0.954233	0.976318	0.915493	SMED30021767	AsxlWT_comp58218_c1_seq5	AsxlWT	2635	SMEDS2F2_0000092	0	1	.	0	Q9DBT5	0	AMP deaminase 2	XP_003699535.1	0	AMP deaminase 2 isoform 1 [Megachile rotundata]
SMED30025009	0.121634	-0.27087	-0.198414	0.33456	0.381312	0.384462	0.363398	0.258823	0.121634		0	0	0	0	0	0	0	0	0.802875	0.603846	0.698191	0.480239	0.421379	0.410962	0.443403	0.584616	0.968729	0.850877	0.883638	0.837214	0.774548	0.781665	0.794758	0.881997	SMED30025009	AsxlX1_comp82709_c0_seq20	AsxlX1	374	NA	NA	1	.	0	Q8IY51	4e-17	Tigger transposable element-derived protein 4 [Homo sapiens]	XP_003369532.1	7e-22	tigger transposable element-derived protein 6 [Trichinella spiralis]
SMED30016721	-0.274124	0.0730072	0.113753	-0.0866363	-0.330673	0.0229565	-0.0225295	-0.118391	-0.274124		0	0	0	0	0	0	0	0	0.140059	0.677771	0.51168	0.633506	0.0832726	0.897141	0.90076	0.511063	0.638392	0.887491	0.777995	0.896838	0.391414	0.977146	0.975997	0.850714	SMED30016721	berlin_isotig12751	Berlin	860	smed28430	1	.	.	.	.	.	.	.	.	.
SMED30004611	-0.13831	0.709289	-0.615358	0.246502	-0.2493	1.01941	0.116415	-0.144932	-0.13831		0	0	0	0	0	0	0	0	0.850073	0.27643	0.429952	0.724269	0.741558	0.104503	0.870789	0.841716	0.975648	0.635126	0.724529	0.929637	0.925689	0.467357	0.967922	0.962855	SMED30004611	uniq_sm_591259	033226_uniq	341	sm_591259	0	.	.	.	.	.	.	.	.	.
SMED30001913	-0.158604	0.0906636	-0.41638	-0.219265	-0.891716	-0.632787	-0.134706	-0.353307	-0.158604		0	0	0	0	0	0	0	0	0.661965	0.794382	0.269544	0.55355	0.03393	0.109828	0.713386	0.343835	0.92958	0.934782	0.583185	0.866762	0.252257	0.477311	0.916469	0.759828	SMED30001913	AsxlX1_comp75879_c0_seq2	AsxlX1	1311	NA	NA	1	.	0	Q9NP08	2e-25	Homeobox protein HMX1	AFJ24861.1	3e-96	hmx-1 [Schmidtea mediterranea]
SMED30022405	0.154454	-1.01447	0.447418	-0.498924	0.105434	0.0752642	0.232709	0.164069	0.154454		0	0	0	0	0	0	0	0	0.759288	0.0772865	0.361393	0.358245	0.837392	0.882513	0.644581	0.743516	0.960783	0.356413	0.669715	0.764473	0.95575	0.972086	0.891536	0.938623	SMED30022405	uniq_sm_rc_466745	033226_uniq	455	sm_rc_466745	0	.	.	.	.	.	.	.	.	.
SMED30009302	-0.0159155	0.040127	0.156307	0.0948575	-0.0997327	-0.262507	-0.227708	-0.370813	-0.0159155		0	0	0	0	0	0	0	0	0.851601	0.637084	0.065907	0.264733	0.241801	0.00208324	0.00758614	1.40555e-05	0.97617	0.867326	0.281168	0.686346	0.625195	0.0558277	0.112931	0.00134812	SMED30009302	SxlWT_comp47540_c0_seq1	SxlWT	608	SMEDS2F2_0002230	0	1	YES	0	.	.	.	.	.	.
SMED30034879	0.0184987	0.156584	0.123845	-0.179897	-0.0946999	0.071351	0.109248	0.00113105	0.0184987		0	0	0	0	0	0	0	0	0.893011	0.24788	0.359952	0.204783	0.502414	0.602518	0.426339	0.993467	0.982002	0.607081	0.668612	0.626584	0.822991	0.875543	0.782613	0.998553	SMED30034879	AsxlWT_comp50486_c0_seq1	AsxlWT	1309	smed014655	2	1	YES	1	Q810C0	9e-08	SLIT and NTRK-like protein 2	XP_002667367.2	1e-08	SLIT and NTRK-like family, member 5b [Danio rerio]
SMED30030034	0.0170786	0.120939	0.0741551	0.0269722	0.0382824	-0.035878	-0.0365068	-0.0444215	0.0170786		0	0	0	0	0	0	0	0	0.738717	0.0176464	0.145698	0.599311	0.456902	0.485225	0.47905	0.386704	0.956453	0.161253	0.431361	0.884906	0.796184	0.820463	0.814311	0.786947	SMED30030034	AsxlWT_comp36907_c0_seq1	AsxlWT	1597	SMEDS2F2_0000528	1	1	.	0	Q91YI0	0	Argininosuccinate lyase	ESP01681.1	0	hypothetical protein LOTGIDRAFT_200177 [Lottia gigantea]
SMED30007984	-0.131105	-0.127931	0.882488	-0.0907855	-0.790475	-0.852347	-0.266788	-0.593993	-0.131105		0	0	0	0	0	0	0	0	0.858808	0.862487	0.170703	0.902304	0.338502	0.299744	0.726411	0.449548	0.977674	0.957137	0.470027	0.975318	0.716536	0.702357	0.921863	0.822276	SMED30007984	AsxlX1_comp40605_c0_seq1	AsxlX1	1026	SMEDS2F2_0001743	0	1	.	0	O74856	3e-48	Poly(A) ribonuclease pop2	ADF47417.1	2e-120	CCR4-NOT transcription complex subunit 7 [Dugesia japonica]
SMED30031701	0.142999	0.245306	0.275062	-0.103353	0.125497	-0.101029	0.128611	-0.054505	0.142999		0	0	0	0	0	0	0	0	0.494029	0.235287	0.17897	0.635048	0.555322	0.641139	0.543848	0.798934	0.876436	0.592082	0.480493	0.89742	0.848715	0.894588	0.844289	0.95349	SMED30031701	AsxlX1_comp52456_c0_seq1	AsxlX1	1025	NA	NA	1	.	0	.	.	.	AFJ24787.1	1e-09	hypothetical protein [Schmidtea mediterranea]
SMED30009184	0.000200047	-0.0334078	-0.0779357	-0.192414	-0.079587	-0.184591	-0.129896	-0.182015	0.000200047		0	0	0	0	0	0	0	0	0.998285	0.721244	0.40507	0.0434668	0.401057	0.051803	0.171313	0.0540899	0.999551	0.907257	0.705658	0.305693	0.758337	0.34365	0.560238	0.377811	SMED30009184	AsxlWT_comp60838_c0_seq13	AsxlWT	1160	SMEDS2F2_0000971	0	1	.	0	Q4R6D3	9e-15	Putative ubiquitin carboxyl-terminal hydrolase 50	EFX86965.1	4e-18	hypothetical protein DAPPUDRAFT_307077 [Daphnia pulex]
SMED30025835	-0.0169267	-0.0922063	-0.0466769	0.0133006	0.0210136	-0.052313	-0.0460198	0.0537386	-0.0169267		0	0	0	0	0	0	0	0	0.829888	0.244267	0.553434	0.866138	0.790501	0.508197	0.561863	0.492827	0.972977	0.603254	0.807163	0.968646	0.940015	0.834513	0.852074	0.840719	SMED30025835	Sxlembryo_comp78088_c0_seq1	Sxlembryo	3994	DQ336175	0	1	YES	1	Q9HCK4	3e-60	Roundabout homolog 2	ABC61955.1	0	roboB [Schmidtea mediterranea]
SMED30003458	0.106365	0.0626132	0.117438	-0.0551745	-0.185865	-0.242288	-0.192782	-0.326361	0.106365		0	0	0	0	0	0	0	0	0.365582	0.59616	0.316098	0.645275	0.127604	0.046277	0.113134	0.00744928	0.817149	0.847251	0.62851	0.901552	0.480187	0.325207	0.465706	0.133354	SMED30003458	AsxlWT_comp44679_c0_seq1	AsxlWT	722	SMEDS2F2_0001682	4	1	.	0	Q99P58	1e-76	Ras-related protein Rab-27B [Mus musculus]	AAX27619.2	1e-80	SJCHGC04801 protein [Schistosoma japonicum]
SMED30002943	-0.00860053	0.386368	-0.567414	0.0368345	-0.161082	0.704715	-0.834177	-2.14432	-0.00860053		0	0	0	0	0	0	0	0	0.990743	0.578768	0.48187	0.960447	0.835231	0.286949	0.33275	0.0375281	0.998873	0.838377	0.757662	0.991241	0.955036	0.691069	0.724611	0.317361	SMED30002943	AsxlWT_comp23796_c0_seq1	AsxlWT	302	NA	NA	1	.	0	.	.	.	.	.	.
SMED30013958	-0.0385071	-0.0327879	-0.0477978	-0.105035	0.0709579	0.011083	0.051375	0.247381	-0.0385071		0	0	0	0	0	0	0	0	0.606631	0.661227	0.521777	0.166102	0.342811	0.88185	0.491731	0.000625631	0.912226	0.880294	0.785166	0.577917	0.718633	0.972033	0.818863	0.0258017	SMED30013958	AsxlWT_comp57086_c0_seq4	AsxlWT	1945	SMEDS2F2_0003529	1	1	.	7	Q75Z89	1e-12	5-hydroxytryptamine receptor 2A	NP_001191178.1	1e-13	serotonin receptor [Apis mellifera]
SMED30018148	0.0729981	-0.714751	-0.320286	-0.166758	-0.353183	0.0360316	0.18007	0.0738133	0.0729981		0	0	0	0	0	0	0	0	0.80019	0.0303486	0.295843	0.58212	0.263099	0.901611	0.530709	0.797023	0.968638	0.218803	0.608373	0.877322	0.645671	0.978005	0.837105	0.953403	SMED30018148	uniq_sm_rc_645650	033226_uniq	353	sm_rc_645650	0	.	.	.	.	.	.	.	.	.
SMED30016421	0.0718314	0.171565	-0.0168642	0.0142886	0.180389	0.390141	0.294188	0.345117	0.0718314		0	0	0	0	0	0	0	0	0.767933	0.476439	0.945085	0.953701	0.45846	0.0979185	0.219606	0.142919	0.962883	0.783907	0.982356	0.989501	0.79728	0.456256	0.619194	0.563322	SMED30016421	berlin_CUFF.42428.1	Berlin	448	NA	NA	.	.	.	.	.	.	.	.	.
SMED30033989	-0.144636	-0.356311	-0.530063	-0.101264	0.117792	-0.0784707	0.253182	0.149485	-0.144636		0	0	0	0	0	0	0	0	0.579213	0.186155	0.0538791	0.698169	0.6437	0.762071	0.309177	0.548159	0.907128	0.536123	0.25136	0.921402	0.890449	0.937014	0.704159	0.867734	SMED30033989	berlin_CUFF.178443.1	Berlin	327	NA	NA	.	.	.	.	.	.	.	.	.
SMED30014481	0.28993	-0.0283351	0.151757	0.367753	0.168519	0.121185	0.205759	0.442179	0.28993		0	0	0	0	0	0	0	0	0.28782	0.919621	0.581442	0.176634	0.545244	0.661942	0.456952	0.100344	0.769692	0.975893	0.826491	0.591955	0.84336	0.901558	0.803595	0.495918	SMED30014481	uniq_sm_576747	033226_uniq	546	sm_576747	0	.	.	.	.	.	.	.	.	.
SMED30019223	-0.0876744	-0.257737	-0.251651	-0.303191	-0.00473435	0.0156899	-0.142539	-0.0721704	-0.0876744		0	0	0	0	0	0	0	0	0.234999	0.000595385	0.000755822	6.25502e-05	0.949005	0.830509	0.0565661	0.32657	0.731912	0.0162834	0.0142887	0.00241365	0.987837	0.959024	0.338119	0.747274	SMED30019223	AsxlWT_comp53696_c0_seq1	AsxlWT	1400	SMEDS2F2_0001836	5	1	.	0	Q6ZV65	6e-23	Protein FAM47E [Homo sapiens]	XP_002734990.1	2e-89	protein FAM47E-like [Saccoglossus kowalevskii]
SMED30034063	0.100923	0.0892087	0.0229576	-0.0298266	0.132246	0.0630816	0.027732	0.0517643	0.100923		0	0	0	0	0	0	0	0	0.237916	0.297762	0.789155	0.731507	0.124551	0.463065	0.749046	0.545866	0.735033	0.656256	0.923778	0.931249	0.475183	0.808395	0.929173	0.866419	SMED30034063	AsxlWT_comp60523_c0_seq1	AsxlWT	2027	SMEDS2F2_0001152	2	1	.	0	Q32LB9	3e-39	Nitric oxide-associated protein 1	CDJ14381.1	3e-62	conserved hypothetical protein [Hymenolepis microstoma]
SMED30027819	-0.0572042	-0.0318439	-0.0444697	-0.00842263	-0.0957199	-0.0451502	-0.0248038	0.0398399	-0.0572042		0	0	0	0	0	0	0	0	0.248439	0.520302	0.368823	0.865108	0.054767	0.362468	0.617368	0.41965	0.744434	0.81086	0.677269	0.968323	0.322751	0.749453	0.879973	0.805932	SMED30027819	AsxlWT_comp62580_c2_seq5	AsxlWT	6782	SMEDS2F2_0000247	0	1	.	0	Q4VA53	1e-53	Sister chromatid cohesion protein PDS5 homolog B	GAA57001.1	2e-124	sister chromatid cohesion protein PDS5 [Clonorchis sinensis]
SMED30011657	-0.166352	-0.386754	-0.31386	-0.171429	-0.102872	0.212584	-0.240377	0.00773121	-0.166352		0	0	0	0	0	0	0	0	0.514351	0.139905	0.224736	0.505143	0.68834	0.386365	0.354934	0.975389	0.884552	0.47196	0.535097	0.850367	0.906345	0.76564	0.741925	0.994589	SMED30011657	berlin_CUFF.23432.1	Berlin	359	NA	NA	.	.	.	.	.	.	.	.	.
SMED30004669	-0.0896548	-0.0754656	-0.0797488	-0.140812	0.0362305	-0.0152512	-0.156183	-0.087547	-0.0896548		0	0	0	0	0	0	0	0	0.318246	0.400817	0.373144	0.120154	0.686458	0.864674	0.0857256	0.328964	0.790123	0.738897	0.681314	0.503511	0.905848	0.96674	0.410065	0.749291	SMED30004669	AsxlX1_comp69675_c0_seq1	AsxlX1	1105	SMEDS2F2_0001400	2	1	.	0	Q9NQG5	2e-46	Regulation of nuclear pre-mRNA domain-containing protein 1B	XP_005101801.1	9e-61	regulation of nuclear pre-mRNA domain-containing protein 1B-like [Aplysia californica]
SMED30006485	0.0419424	0.0178135	0.0849867	-0.00115424	0.0426522	-0.0181267	-0.0277838	-0.0118859	0.0419424		0	0	0	0	0	0	0	0	0.476059	0.762548	0.147298	0.984432	0.471127	0.759011	0.639323	0.840246	0.869959	0.922791	0.433874	0.997351	0.805978	0.936204	0.888529	0.962657	SMED30006485	AsxlWT_comp52943_c0_seq1	AsxlWT	1745	SMEDS2F2_0002146	0	1	.	0	Q99L88	3e-124	Beta-1-syntrophin	CCD81367.1	3e-167	putative syntrophin [Schistosoma mansoni]
SMED30015770	-0.0642413	-0.270143	0.719104	-0.351446	-0.305657	-0.994796	-0.202945	0.0941346	-0.0642413		0	0	0	0	0	0	0	0	0.898886	0.606518	0.102494	0.512038	0.5691	0.0943637	0.699374	0.847588	0.983358	0.852156	0.356624	0.854064	0.856302	0.450061	0.912032	0.964792	SMED30015770	berlin_isotig08654	Berlin	406	isotig08654	0	.	.	.	.	.	.	.	.	.
SMED30035662	-0.0907328	-0.129986	-0.128585	-0.108051	-0.154345	-0.0570006	-0.0901965	-0.122898	-0.0907328		0	0	0	0	0	0	0	0	0.214647	0.0757554	0.0787066	0.140106	0.0354862	0.435533	0.218087	0.0929682	0.713197	0.352961	0.307982	0.537915	0.258294	0.792697	0.617718	0.479306	SMED30035662	Sxlembryo_comp92070_c0_seq1	Sxlembryo	3757	SMEDS2F2_0001015	0	1	.	0	Q0V9K5	1e-159	Transcription factor RFX3	CDJ07179.1	0	transcription factor rfx3 [Hymenolepis microstoma]
SMED30020608	-0.154265	-0.0214281	-0.0853671	-0.0825197	0.282657	-0.0446345	0.0716153	0.0507108	-0.154265		0	0	0	0	0	0	0	0	0.520221	0.928091	0.719647	0.730583	0.227402	0.851308	0.762356	0.829052	0.886899	0.979171	0.893576	0.930817	0.612988	0.964354	0.93153	0.961142	SMED30020608	OX_Smed_1.0.16536	Oxford	421	isotig17800	0	.	.	.	.	.	.	.	.	.
SMED30012159	-0.0580606	-0.0404472	-0.117556	-0.0917659	0.0346865	-0.0916362	-0.0484612	-0.0409714	-0.0580606		0	0	0	0	0	0	0	0	0.276034	0.447913	0.0275479	0.0860209	0.515537	0.0860899	0.364224	0.441626	0.761777	0.762961	0.167243	0.429976	0.828437	0.432553	0.743528	0.818596	SMED30012159	AsxlWT_comp61528_c0_seq2	AsxlWT	3319	SMEDS2F2_0000167	4	1	.	0	Q6P4K6	1e-20	Serine/threonine-protein kinase 11-interacting protein	NP_989177.1	1e-18	serine/threonine-protein kinase 11-interacting protein [Xenopus (Silurana) tropicalis]
SMED30016314	-0.0378733	0.0234687	0.0512726	0.0570691	-0.0463017	0.109754	0.119986	0.199151	-0.0378733		0	0	0	0	0	0	0	0	0.450995	0.638825	0.302076	0.254429	0.362448	0.0271173	0.0161642	4.94977e-05	0.855793	0.868065	0.614474	0.677228	0.732364	0.248077	0.179395	0.00392077	SMED30016314	AsxlWT_comp53913_c0_seq1	AsxlWT	2110	SMEDS2F2_0001520	5	1	.	8	Q86B91	0.0003	Protein tincar [Drosophila melanogaster]	ERG80758.1	2e-13	hypothetical protein ASU_11300 [Ascaris suum]
SMED30012889	0.0300016	0.0552993	0.0418113	0.0924906	0.0978773	0.0970388	0.0705662	0.0296396	0.0300016		0	0	0	0	0	0	0	0	0.532463	0.249775	0.383936	0.0543037	0.0418935	0.043314	0.142307	0.537308	0.890087	0.609395	0.688558	0.340843	0.283657	0.314424	0.517654	0.863607	SMED30012889	AsxlWT_comp22366_c0_seq1	AsxlWT	1301	SMEDS2F2_0000797	0	1	.	0	O02485	4e-40	Uncharacterized protein ZK1073.1 [Caenorhabditis elegans]	CAX82984.1	2e-104	hypothetical protein [Schistosoma japonicum]
SMED30018384	-0.0294553	-0.442455	-0.220752	-0.415531	0.400706	-0.173817	-0.00823826	-0.274065	-0.0294553		0	0	0	0	0	0	0	0	0.944008	0.320501	0.606907	0.351548	0.319464	0.685727	0.984493	0.526594	0.99174	0.67489	0.839828	0.759076	0.701834	0.911297	0.996241	0.858728	SMED30018384	Sxlregen_comp60691_c0_seq1	Sxlregen	1317	NA	NA	1	.	0	.	.	.	.	.	.
SMED30009421	-0.0841408	-0.193965	-0.127584	-0.200635	-0.157515	-0.195391	-0.200964	-0.137112	-0.0841408		0	0	0	0	0	0	0	0	0.178381	0.0020531	0.041447	0.00147409	0.0126239	0.00191466	0.00146995	0.0286048	0.679403	0.0402367	0.215422	0.0322548	0.148504	0.0526209	0.0405695	0.279012	SMED30009421	AsxlWT_comp54636_c1_seq1	AsxlWT	2491	smed001515	3	2	.	0	Q8K4P0	8e-174	pre-mRNA 3' end processing protein WDR33	CCD76231.1	0	putative wd-repeat protein [Schistosoma mansoni]
SMED30021728	-0.0819363	0.082985	0.0349272	-0.220187	-0.109836	0.0597482	-0.0333811	0.274304	-0.0819363		0	0	0	0	0	0	0	0	0.68271	0.673378	0.859316	0.283901	0.590061	0.762493	0.86828	0.152961	0.937744	0.885596	0.950185	0.705146	0.865431	0.937085	0.967206	0.579062	SMED30021728	SRG12_27766_c0s2	SRG12	764	NA	NA	1	.	0	.	.	.	ADU04477.1	4e-12	transposase [Aphis gossypii]
SMED30005011	0.612203	-0.040269	-0.389167	-0.000790536	-0.154025	0.44559	-0.679973	-0.506493	0.612203		0	0	0	0	0	0	0	0	0.160237	0.934311	0.449624	0.99871	0.761185	0.322558	0.218881	0.335092	0.66103	0.981911	0.739342	0.99987	0.9333	0.717723	0.618323	0.753542	SMED30005011	AsxlX1_comp83556_c0_seq1	AsxlX1	974	NA	NA	.	.	.	.	.	.	.	.	.
SMED30028631	-0.0849534	0.074499	-0.537634	0.251452	-0.068153	-0.18903	-0.0869334	0.174174	-0.0849534		0	0	0	0	0	0	0	0	0.81107	0.830113	0.15505	0.460493	0.849926	0.601678	0.809177	0.608933	0.970761	0.946842	0.446629	0.824849	0.959667	0.875381	0.948932	0.888758	SMED30028631	uniq_smed017522	033226_uniq	369	smed017522	0	.	.	.	.	.	.	.	.	.
SMED30027749	-0.257811	-0.325805	-0.197654	-0.181472	-0.107221	-0.430619	-0.276504	-0.261185	-0.257811		0	0	0	0	0	0	0	0	0.170648	0.0855914	0.289624	0.334126	0.567401	0.0245065	0.145123	0.164165	0.672643	0.375762	0.601967	0.748233	0.855477	0.236042	0.522755	0.595792	SMED30027749	OX_Smed_1.0.03755	Oxford	862	isotig21014	0	.	.	.	.	.	.	.	.	.
SMED30010670	0.0333925	0.0385777	0.0834339	0.0641414	0.0498597	0.0671109	0.117177	0.0758562	0.0333925		0	0	0	0	0	0	0	0	0.536406	0.475106	0.121778	0.235266	0.356934	0.213914	0.0300374	0.159711	0.892801	0.782958	0.392528	0.657295	0.728221	0.618452	0.246448	0.58845	SMED30010670	AsxlWT_comp56606_c0_seq2	AsxlWT	2403	SMEDS2F2_0000620	2	2	.	9	Q17JQ7	6e-85	CTL-like protein 1 [Aedes aegypti]	EKC37701.1	2e-111	Choline transporter-like protein 1 [Crassostrea gigas]
SMED30034395	-0.277891	-0.90327	-1.06676	-0.678126	0.169342	-0.200398	-0.584126	-0.244055	-0.277891		0	-1	-1	0	0	0	0	0	0.381623	0.00867389	0.00231826	0.0442931	0.579175	0.525359	0.0801519	0.439249	0.828274	0.104994	0.0323253	0.308377	0.861055	0.843732	0.397679	0.81721	SMED30034395	uniq_sm_rc_673762	033226_uniq	317	sm_rc_673762	0	1	.	1	.	.	.	.	.	.
SMED30007190	-0.612214	0.134165	0.845785	-0.0960087	0.511713	0.443394	0.360212	0.0157959	-0.612214		0	0	0	0	0	0	0	0	0.279955	0.790953	0.0622322	0.855661	0.29112	0.359939	0.466737	0.975494	0.764813	0.933233	0.272382	0.965739	0.672849	0.747162	0.807324	0.994591	SMED30007190	AsxlWT_comp3182_c0_seq1	AsxlWT	860	smed018272	8	1	.	0	.	.	.	.	.	.
SMED30015635	0.958952	-0.151862	0.336325	0.203747	0.959267	0.119581	-0.225209	0.185568	0.958952		0	0	0	0	0	0	0	0	0.0198845	0.74857	0.446825	0.654106	0.0213682	0.793982	0.641685	0.680904	0.313154	0.918318	0.738052	0.906054	0.197797	0.947867	0.889744	0.915629	SMED30015635	AsxlX1_comp70078_c0_seq2	AsxlX1	985	smed013021	0	1	.	0	.	.	.	.	.	.
SMED30001445	-0.246847	-0.123239	-0.276044	-0.0830422	-0.40855	-0.0554864	-0.000153659	-0.221258	-0.246847		0	0	0	0	0	0	0	0	0.556155	0.765276	0.510159	0.840712	0.349241	0.892293	0.999764	0.594841	0.902336	0.924038	0.777113	0.962105	0.723349	0.974797	0.999831	0.886016	SMED30001445	dd_smedV4_18941_0_1	Dresden	1244	NA	NA	3	.	1	.	.	.	.	.	.
SMED30013956	-0.292132	-0.416586	-0.144766	-0.561614	-0.437229	-0.474044	-0.382235	-0.945459	-0.292132		0	0	0	0	0	0	0	-1	0.291355	0.141621	0.589354	0.0553507	0.130957	0.0986982	0.180838	0.00218805	0.772889	0.474298	0.83125	0.344451	0.486146	0.456974	0.573633	0.0612185	SMED30013956	Asxlsort_comp55987_c0_seq1	Asxlsort	608	NA	NA	1	.	0	B3NDN0	2e-21	Kelch-like protein diablo	XP_006611513.1	4e-20	kelch-like protein diablo-like [Apis dorsata]
SMED30033492	0.088684	0.0247113	-0.0749644	0.0556601	0.167928	-0.00511088	0.0623546	-0.0578794	0.088684		0	0	0	0	0	0	0	0	0.302132	0.773838	0.383571	0.517517	0.0508472	0.95262	0.4685	0.501101	0.780367	0.927133	0.688131	0.856424	0.311499	0.98991	0.808513	0.844606	SMED30033492	AsxlWT_comp39646_c0_seq1	AsxlWT	1062	SMEDS2F2_0000854	0	1	.	8	.	.	.	XP_003968058.1	4e-23	uncharacterized protein LOC101063288 [Takifugu rubripes]
SMED30035020	-0.245204	-0.0136817	-0.930219	0.243671	-0.44953	-0.226706	0.274727	-0.0389564	-0.245204		0	0	0	0	0	0	0	0	0.774761	0.987637	0.318854	0.764194	0.615546	0.791603	0.735487	0.962867	0.96411	0.996801	0.630838	0.941362	0.877085	0.946477	0.9258	0.990455	SMED30035020	Asxlregen_comp60277_c1_seq2	Asxlregen	520	NA	NA	1	.	0	.	.	.	.	.	.
SMED30004531	0.105117	-0.0402982	-0.069637	-0.0148042	0.147569	0.17086	0.0573283	0.0441143	0.105117		0	0	0	0	0	0	0	0	0.235979	0.654257	0.438338	0.86958	0.0982164	0.0531733	0.523046	0.620205	0.732831	0.876889	0.731237	0.969581	0.425538	0.347267	0.833925	0.890913	SMED30004531	AsxlWT_comp32327_c0_seq1	AsxlWT	1502	SMEDS2F2_0000217	2	1	.	4	Q6H1V1	2e-40	Bestrophin-3	XP_008186792.1	2e-46	bestrophin-1-like [Acyrthosiphon pisum]
SMED30000525	-0.70267	-0.945718	-0.166858	0.378204	-0.211237	-0.279653	0.0161076	-0.166735	-0.70267		0	0	0	0	0	0	0	0	0.162672	0.0714077	0.716194	0.375854	0.655171	0.553412	0.971733	0.716555	0.664612	0.34223	0.892604	0.77694	0.89465	0.857401	0.993562	0.928869	SMED30000525	AsxlX1_comp169962_c0_seq1	AsxlX1	424	NA	NA	1	.	0	.	.	.	.	.	.
SMED30027328	-0.199607	-0.146096	-0.317542	-0.383625	-0.286689	-1.03263	-0.405368	-0.512756	-0.199607		0	0	0	0	0	-1	0	0	0.564943	0.671533	0.366301	0.286916	0.422948	0.00946439	0.264601	0.157348	0.90488	0.884831	0.674438	0.708673	0.774548	0.141865	0.664347	0.584913	SMED30027328	berlin_isotig25808	Berlin	533	isotig25808	0	.	.	.	.	.	.	.	.	.
SMED30024656	-0.163747	-0.051895	-0.108726	0.0854892	0.115186	-0.0892267	0.304159	-0.0571904	-0.163747		0	0	0	0	0	0	0	0	0.455517	0.809863	0.615034	0.687277	0.588682	0.681714	0.139381	0.789738	0.85628	0.939049	0.841107	0.916448	0.864789	0.9095	0.512661	0.95042	SMED30024656	Sxlembryo_comp101539_c0_seq2	Sxlembryo	813	NA	NA	1	.	0	Q9P215	7e-10	Pogo transposable element with KRAB domain [Homo sapiens]	EGZ20337.1	4e-41	hypothetical protein PHYSODRAFT_245876 [Phytophthora sojae]
SMED30015560	-0.244783	-0.405363	-0.247997	-0.298834	-0.0850023	-0.151796	-0.173679	-0.0700064	-0.244783		0	0	0	0	0	0	0	0	0.00274759	9.40135e-07	0.00236925	0.000283385	0.296654	0.0621165	0.0337111	0.38609	0.11393	8.17624e-05	0.0327323	0.0085075	0.678334	0.375211	0.261983	0.786548	SMED30015560	AsxlWT_comp60427_c3_seq2	AsxlWT	1637	SMEDS2F2_0002189	0	2	.	0	P39429	6e-06	TNF receptor-associated factor 2	AFJ24791.1	5e-11	TNF receptor associated factor-3, partial [Schmidtea mediterranea]
SMED30008005	-0.148926	-0.245931	-0.120364	0.14477	-0.138515	-0.066932	0.155853	-0.0239078	-0.148926		0	0	0	0	0	0	0	0	0.526116	0.303787	0.604665	0.52125	0.561647	0.773578	0.49116	0.916856	0.888118	0.661876	0.838189	0.85669	0.853114	0.941854	0.818558	0.981841	SMED30008005	AsxlX1_comp81986_c1_seq2	AsxlX1	1786	NA	NA	2	.	0	Q99NI3	4e-09	General transcription factor II-I repeat domain-containing protein 2	XP_558399.5	9e-21	Anopheles gambiae str. PEST AGAP012527-PA [Anopheles gambiae str. PEST]
SMED30026634	0.273582	-0.10689	-0.564962	-0.846086	0.277475	-0.0442052	-0.747935	-0.0552786	0.273582		0	0	0	0	0	0	0	0	0.578269	0.833657	0.284854	0.12438	0.577264	0.93055	0.170392	0.912972	0.907128	0.948684	0.598346	0.512558	0.860832	0.985268	0.558905	0.980244	SMED30026634	berlin_isotig11349	Berlin	478	isotig11349	0	.	.	.	.	.	.	.	.	.
SMED30029587	0.0567514	0.0332097	0.0443604	-0.00288413	0.0698473	0.000858756	0.0542819	0.0578273	0.0567514		0	0	0	0	0	0	0	0	0.338296	0.575512	0.454019	0.961279	0.239619	0.988456	0.360482	0.329049	0.801439	0.838103	0.741125	0.99148	0.623575	0.996441	0.743528	0.749291	SMED30029587	AsxlWT_comp25370_c0_seq1	AsxlWT	1578	SMEDS2F2_0000941	3	1	.	0	Q619W9	1e-151	Probable V-type proton ATPase subunit H 2	CAX69716.1	0	Vacuolar H+-ATPase SFD subunit [Schistosoma japonicum]
SMED30029064	-0.010937	-0.0425946	-0.0645014	-0.0400507	-0.068094	-0.232224	-0.124553	-0.0794065	-0.010937		0	0	0	0	0	0	0	0	0.889639	0.589897	0.413793	0.613409	0.392869	0.00372907	0.11856	0.315289	0.981429	0.843476	0.712854	0.889338	0.752001	0.0805979	0.476605	0.737291	SMED30029064	AsxlX1_comp72689_c0_seq1	AsxlX1	2397	SMEDS2F2_0000194	2	2	.	12	Q91YT8	5e-102	Transmembrane protein 63A [Mus musculus]	XP_005095546.1	9e-131	transmembrane protein 63B-like isoform X1 [Aplysia californica]
SMED30027060	-0.0455576	-0.327668	0.166276	0.93447	0.492897	-1.90616	0.656899	-0.360612	-0.0455576		0	0	0	0	0	0	0	0	0.954332	0.694273	0.827776	0.171664	0.506338	0.0739901	0.361239	0.66472	0.993552	0.893787	0.938791	0.585545	0.825	0.404853	0.743528	0.90908	SMED30027060	uniq_sm_677589	033226_uniq	316	sm_677589	0	.	.	.	.	.	.	.	.	.
SMED30033863	-0.0684195	-0.0221687	0.0808412	0.409631	0.138488	0.232697	0.223611	0.0495524	-0.0684195		0	0	0	0	0	0	0	0	0.828646	0.943726	0.791759	0.162535	0.655502	0.439641	0.463083	0.872202	0.972744	0.984801	0.924556	0.572742	0.894898	0.795169	0.805598	0.970736	SMED30033863	Sxlregen_comp53298_c0_seq2	Sxlregen	1273	NA	NA	1	.	1	.	.	.	.	.	.
SMED30021335	0.402363	0.424184	0.254194	0.313657	0.29413	0.184136	0.450917	0.513679	0.402363	3	0	0	0	0	0	0	0	1	6.6234e-05	2.52684e-05	0.0129769	0.00224158	0.00450085	0.0763593	8.41139e-06	2.27712e-07	0.00891664	0.00127066	0.10271	0.0441854	0.0808133	0.410601	0.000931794	4.24606e-05	SMED30021335	AsxlWT_comp17569_c0_seq1	AsxlWT	1113	sm_170992	2	1	.	6	P48043	3e-06	Vasopressin V1a receptor	EUB56316.1	2e-53	Neuropeptide S receptor [Echinococcus granulosus]
SMED30015056	-0.214607	-0.282651	-0.583662	-0.107524	0.279702	0.17313	-0.00716453	0.140119	-0.214607		0	0	0	0	0	0	0	0	0.387822	0.260532	0.0250077	0.663143	0.236064	0.464474	0.976637	0.553227	0.832044	0.620009	0.157629	0.908553	0.620891	0.809238	0.994087	0.870553	SMED30015056	uniq_sm_112118	033226_uniq	487	sm_112118	0	.	.	.	.	.	.	.	.	.
SMED30009791	-0.117085	-0.052381	-0.0619835	-0.1118	-0.0354343	0.0130709	0.276532	0.402316	-0.117085	1	0	0	0	0	0	0	0	0	0.0321435	0.336311	0.254369	0.0413808	0.517376	0.809855	2.72238e-07	4.22656e-14	0.385928	0.687987	0.567515	0.297698	0.829225	0.952584	5.37689e-05	3.5246e-11	SMED30009791	AsxlWT_comp61784_c1_seq2	AsxlWT	4394	SMEDS2F2_0000269	22	1	.	7	Q64446	0	Copper-transporting ATPase 2	EKC18325.1	0	Copper-transporting ATPase 1 [Crassostrea gigas]
SMED30014551	-0.0416521	-0.00495554	-0.159552	-0.0444579	0.0552112	-0.0238873	-0.121991	-0.0392913	-0.0416521		0	0	0	0	0	0	0	0	0.551397	0.943434	0.0230528	0.526159	0.430098	0.732704	0.0833604	0.573835	0.899598	0.984801	0.149798	0.858445	0.778269	0.926822	0.405253	0.878431	SMED30014551	SxlWT_comp59639_c0_seq2	SxlWT	2370	SMEDS2F2_0002654	0	1	.	0	.	.	.	.	.	.
SMED30003261	-0.0844076	-0.0494922	-0.0182306	0.0658856	-0.0523033	-0.0656499	-0.0353397	-0.033354	-0.0844076		0	0	0	0	0	0	0	0	0.194945	0.446209	0.777375	0.307154	0.425671	0.313651	0.588651	0.605807	0.692737	0.762069	0.918509	0.722994	0.77524	0.713598	0.865592	0.888758	SMED30003261	Sxlembryo_comp101659_c0_seq23	Sxlembryo	2219	SMEDS2F2_0001932	5	5	YES	1	Q8WZ73	0.0002	E3 ubiquitin-protein ligase rififylin	XP_002164774.2	0.0004	E3 ubiquitin-protein ligase MIB1 [Hydra vulgaris]
SMED30023052	-0.027747	-0.0531094	0.0185095	0.0175447	0.0339403	-0.148501	-0.0607574	-0.0221568	-0.027747		0	0	0	0	0	0	0	0	0.731121	0.512026	0.817491	0.828089	0.675271	0.0694413	0.456418	0.783236	0.954103	0.805985	0.934632	0.958225	0.902572	0.394306	0.803457	0.949068	SMED30023052	Sxlembryo_comp88268_c0_seq3	Sxlembryo	1145	SMEDS2F2_0001798	0	1	.	0	Q96PU8	1e-55	Protein quaking	CDJ22847.1	7e-66	protein quaking [Echinococcus granulosus]
SMED30029460	0.121365	0.0828064	0.0715324	0.169523	-0.011391	0.0617367	0.210228	0.37784	0.121365		0	0	0	0	0	0	0	0	0.34167	0.518963	0.575919	0.184388	0.931027	0.632083	0.099095	0.00218136	0.802583	0.810132	0.823096	0.601358	0.983382	0.890417	0.44051	0.0611949	SMED30029460	uniq_sm_115993	033226_uniq	1134	sm_115993	0	.	.	.	.	.	.	XP_004213115.1	6e-05	uncharacterized protein LOC101241545 [Hydra vulgaris]
SMED30014207	-0.0212762	-0.0276493	0.0661031	-0.0122104	-0.0159462	-0.0153391	0.0388605	0.0712922	-0.0212762		0	0	0	0	0	0	0	0	0.705887	0.624052	0.239354	0.828819	0.778082	0.785674	0.490917	0.204518	0.94723	0.861256	0.552531	0.958584	0.936665	0.944591	0.818405	0.644299	SMED30014207	AsxlWT_comp47373_c0_seq2	AsxlWT	2961	SMEDS2F2_0000052	6	1	.	0	Q9Y2G0	2e-125	Protein EFR3 homolog B [Homo sapiens]	CCD82158.1	0	hypothetical protein Smp_158300 [Schistosoma mansoni]
SMED30014929	0.15145	0.226274	0.265582	0.140722	0.177255	0.167102	0.198889	0.129072	0.15145		0	0	0	0	0	0	0	0	0.171824	0.0394013	0.0144542	0.208414	0.113799	0.132061	0.0741533	0.24388	0.673387	0.25146	0.110709	0.630918	0.455271	0.512621	0.383358	0.683639	SMED30014929	AsxlWT_comp59457_c1_seq1	AsxlWT	1597	SMEDS2F2_0001493	14	2	.	2	Q54EY1	9e-53	D-tyrosyl-tRNA(Tyr) deacylase [Dictyostelium discoideum]	ABG21820.1	7e-62	D-tyrosyl-tRNA deacylase-like protein [Schistosoma mansoni]
SMED30019022	0.253002	0.244062	0.169566	0.0925404	0.225618	0.124188	0.18589	0.0276919	0.253002		0	0	0	0	0	0	0	0	0.000566972	0.000902789	0.0214289	0.215955	0.00239115	0.0948919	0.012398	0.710887	0.0411286	0.0223619	0.143074	0.637938	0.05443	0.450852	0.154608	0.926429	SMED30019022	AsxlWT_comp29040_c0_seq1	AsxlWT	835	SMEDS2F2_0000770	3	1	.	0	Q9UPV0	3e-08	Centrosomal protein of 164 kDa	AAI26790.1	7e-09	CEP164 protein [Bos taurus]
SMED30012502	-0.0745888	-0.174751	-0.272853	-0.196472	-0.304827	-0.200377	-0.401682	-0.15859	-0.0745888		0	0	0	0	0	0	0	0	0.539836	0.156229	0.0278487	0.113811	0.0161365	0.105545	0.00167352	0.195741	0.893802	0.496208	0.168516	0.489993	0.169977	0.468936	0.0439936	0.633458	SMED30012502	uniq_SMEDS2F2_00031640-RA_1_255	033226_uniq	255	SMEDS2F2_0003164	0	.	.	.	.	.	.	.	.	.
SMED30027834	0.0714403	0.203987	0.155403	0.125665	0.219202	-0.0321844	0.037948	0.0138673	0.0714403		0	0	0	0	0	0	0	0	0.428612	0.0237999	0.0850225	0.163863	0.0151887	0.721509	0.67427	0.8779	0.851108	0.190787	0.321874	0.574411	0.165399	0.922366	0.90346	0.971749	SMED30027834	AsxlX1_comp83606_c0_seq1	AsxlX1	5243	SMEDS2F2_0001704	8	4	.	0	P19971	1e-95	Thymidine phosphorylase	CDJ07518.1	2e-101	thymidine phosphorylase [Hymenolepis microstoma]
SMED30011682	0.0829149	0.303361	0.355954	0.37956	0.212311	0.339916	0.34717	0.263752	0.0829149		0	0	0	0	0	0	0	0	0.240793	1.64775e-05	4.11897e-07	6.97e-08	0.00267148	1.37048e-06	8.33644e-07	0.000179721	0.736926	0.00089777	3.31516e-05	6.90582e-06	0.0583277	0.000250873	0.000138446	0.0106418	SMED30011682	OX_Smed_1.0.12890	Oxford	887	sm_193130	0	1	.	0	.	.	.	CDJ23529.1	0.0003	tegumental antigen [Echinococcus granulosus]
SMED30015752	-0.341564	-0.0326726	-0.18412	0.21046	0.0530641	0.136806	0.499798	0.0859176	-0.341564		0	0	0	0	0	0	0	0	0.396826	0.932083	0.637089	0.569976	0.889933	0.714056	0.158812	0.817884	0.836066	0.98076	0.85114	0.87288	0.97286	0.920181	0.540913	0.958118	SMED30015752	uniq_sm_rc_606150	033226_uniq	379	sm_rc_606150	0	.	.	.	.	.	.	.	.	.
SMED30034654	0.118877	0.331593	0.367922	0.046758	0.101488	0.191945	0.396229	0.0707832	0.118877		0	0	0	0	0	0	0	0	0.377448	0.0107125	0.00410527	0.734107	0.460645	0.150521	0.00232217	0.600396	0.824904	0.11994	0.0476462	0.931681	0.798892	0.541487	0.0543789	0.886901	SMED30034654	AsxlWT_comp53378_c0_seq1	AsxlWT	1286	sm_145556	4	1	.	0	Q28DX0	3e-43	Queuine tRNA-ribosyltransferase subunit qtrtd1	CDJ15757.1	2e-63	queuine tRNA ribosyltransferase subunit QTRTD1 [Echinococcus granulosus]
SMED30020274	0.0813	-0.213169	-0.721605	-0.151844	0.0715214	-0.220561	0.01611	0.151775	0.0813		0	0	-1	0	0	0	0	0	0.707807	0.351522	0.00364853	0.505636	0.746516	0.336983	0.942327	0.476395	0.947359	0.700535	0.0438657	0.850912	0.927313	0.731172	0.985766	0.831361	SMED30020274	Sxlregen_comp15859_c0_seq2	Sxlregen	3473	NA	NA	3	.	0	.	.	.	.	.	.
SMED30027429	-0.212024	0.176949	-0.761317	-0.27706	-0.801336	-0.136591	-0.436677	-0.476049	-0.212024		0	0	0	0	0	0	0	0	0.562564	0.605601	0.0572181	0.458654	0.0528223	0.706642	0.258833	0.211818	0.90403	0.851484	0.259871	0.82437	0.316775	0.918241	0.659434	0.651753	SMED30027429	berlin_isotig13704	Berlin	576	smed021512	16	.	.	.	.	.	.	.	.	.
SMED30031703	-0.00390311	0.00749911	-0.0107971	-0.00885029	0.00775492	-0.0134817	-0.0158656	0.0217707	-0.00390311		0	0	0	0	0	0	0	0	0.926576	0.85946	0.798704	0.834655	0.854966	0.750367	0.708372	0.607031	0.988521	0.956547	0.927675	0.960407	0.961619	0.932543	0.914849	0.888758	SMED30031703	Sxlregen_comp2303_c0_seq1	Sxlregen	4771	SMEDS2F2_0000264	1	2	.	0	Q6NZW8	4e-101	ADP-ribosylation factor-like protein 8B-A	AAP06054.1	9e-105	SJCHGC07031 protein [Schistosoma japonicum]
SMED30014344	-0.436031	-0.427818	0.397146	0.517012	-0.0115483	0.0819341	-0.435283	-0.0215351	-0.436031		0	0	0	0	0	0	0	0	0.287545	0.296825	0.260152	0.140057	0.976249	0.827607	0.295793	0.954741	0.769692	0.65493	0.573707	0.537915	0.99543	0.95781	0.691751	0.989887	SMED30014344	uniq_sm_504280	033226_uniq	623	sm_504280	0	.	.	.	.	.	.	.	.	.
SMED30005821	0.168573	0.192099	0.197224	0.0282192	0.169703	0.0761478	0.0825406	0.0549868	0.168573		0	0	0	0	0	0	0	0	0.00278691	0.000647282	0.000441057	0.621791	0.00282588	0.180401	0.148149	0.332585	0.114578	0.0174278	0.0095741	0.892305	0.0604243	0.579523	0.527827	0.753083	SMED30005821	AsxlWT_comp54692_c0_seq1	AsxlWT	627	SMEDS2F2_0001194	5	1	.	0	.	.	.	.	.	.
SMED30034285	-0.234675	-0.336183	-0.808025	-0.270853	-0.32662	-0.862523	-0.190975	0.158081	-0.234675		0	0	0	0	0	0	0	0	0.543435	0.389593	0.0487461	0.486964	0.407951	0.0378922	0.622484	0.668806	0.896029	0.730769	0.237527	0.84023	0.763045	0.294541	0.881646	0.910577	SMED30034285	OX_Smed_1.0.11293	Oxford	732	smed28804	1	.	.	.	.	.	.	.	.	.
SMED30002194	0.120983	0.377598	0.304773	0.346811	0.509006	0.331815	0.456325	0.26938	0.120983		0	0	0	0	1	0	0	0	0.481639	0.0232159	0.0681207	0.0388974	0.00209431	0.0478385	0.00603959	0.108618	0.870936	0.188672	0.285618	0.287762	0.0499623	0.330481	0.0984741	0.512906	SMED30002194	AsxlWT_comp40057_c0_seq1	AsxlWT	514	isotig08083	0	1	.	0	A4FVI0	2e-08	Zinc finger SWIM domain-containing protein 7	XP_003527578.1	2e-12	zinc finger SWIM domain-containing protein 7-like isoform X1 [Glycine max]
SMED30002905	-0.975632	-0.691398	-1.16036	-1.0933	0.476701	-0.449421	-0.512231	-0.281805	-0.975632		0	0	0	0	0	0	0	0	0.110206	0.240248	0.0628134	0.0806793	0.355025	0.431525	0.377657	0.612422	0.593878	0.598299	0.273845	0.417842	0.726586	0.790952	0.749872	0.888758	SMED30002905	AsxlX1_comp83436_c1_seq19	AsxlX1	1941	NA	NA	4	.	2	.	.	.	.	.	.
SMED30033256	0.683374	1.15725	1.6865	-0.204954	1.02832	0.0120233	0.758502	0.351529	0.683374		0	0	1	0	0	0	0	0	0.30162	0.0587025	0.00243951	0.790847	0.105302	0.98707	0.252099	0.613161	0.780196	0.309443	0.0331988	0.946637	0.440658	0.996153	0.652651	0.888758	SMED30033256	SxlWT_comp17419_c0_seq1	SxlWT	858	smed018778	1	1	YES	0	.	.	.	.	.	.
SMED30033404	0.124857	0.150296	0.165352	0.0324473	0.274685	0.115505	0.154511	0.00279342	0.124857		0	0	0	0	0	0	0	0	0.169055	0.097367	0.0665971	0.724565	0.00238508	0.204615	0.0903498	0.975674	0.671589	0.399379	0.282349	0.929779	0.0543678	0.606909	0.420674	0.994591	SMED30033404	AsxlWT_comp42638_c0_seq1	AsxlWT	1058	SMEDS2F2_0000377	5	1	.	0	.	.	.	.	.	.
SMED30029415	0.0494009	0.0289963	0.057259	0.00219833	0.141594	0.0868802	0.0450472	0.0524258	0.0494009		0	0	0	0	0	0	0	0	0.340447	0.576336	0.268386	0.966322	0.00635005	0.0934193	0.38646	0.311209	0.802085	0.838103	0.582153	0.992369	0.0994444	0.44751	0.75617	0.734778	SMED30029415	AsxlWT_comp55097_c0_seq1	AsxlWT	1045	SMEDS2F2_0001471	0	1	.	1	Q9QY76	1e-31	Vesicle-associated membrane protein-associated protein B	XP_002122168.1	5e-31	vesicle-associated membrane protein-associated protein B-like [Ciona intestinalis]
SMED30000566	-0.0760309	-0.101216	0.0329081	0.00108028	-0.1447	-0.146006	-0.114533	-0.169471	-0.0760309		0	0	0	0	0	0	0	0	0.294644	0.163947	0.647394	0.988107	0.0486355	0.0453666	0.117005	0.0200455	0.774902	0.507513	0.855673	0.99806	0.305138	0.32167	0.473462	0.229748	SMED30000566	AsxlWT_comp41903_c0_seq1	AsxlWT	850	SMEDS2F2_0002188	2	1	.	0	Q4V7T8	9e-73	Ropporin-1-like protein	ELU01477.1	4e-95	hypothetical protein CAPTEDRAFT_173464 [Capitella teleta]
SMED30007235	0.0615726	0.182257	0.121213	-0.0444055	0.0872824	0.114426	0.0131619	0.0317536	0.0615726		0	0	0	0	0	0	0	0	0.329653	0.00357894	0.0530518	0.488353	0.170236	0.0692908	0.83681	0.615391	0.796415	0.0587533	0.249582	0.841164	0.542764	0.394121	0.956988	0.889503	SMED30007235	Sxlembryo_comp78024_c1_seq1	Sxlembryo	1850	SMEDS2F2_0001597	0	1	.	0	Q9NP92	9e-07	28S ribosomal protein S30, mitochondrial	GAA47635.1	3e-67	28S ribosomal protein S30 mitochondrial [Clonorchis sinensis]
SMED30030552	-0.754773	-0.473445	-1.33269	-0.707978	-2.11089	-1.07669	-0.679573	-0.379512	-0.754773		0	0	0	0	-1	0	0	0	0.192236	0.393337	0.0344076	0.222194	0.00397223	0.0782348	0.241717	0.485106	0.69245	0.733348	0.191762	0.644491	0.0747661	0.414855	0.643062	0.836398	SMED30030552	AsxlWT_comp1572122_c0_seq1	AsxlWT	511	NA	NA	1	.	0	.	.	.	.	.	.
SMED30015640	-0.714032	-0.278147	-0.648325	-0.238905	-0.956511	-1.15874	-0.852698	-1.07536	-0.714032		0	0	0	0	0	0	0	0	0.120673	0.516089	0.151728	0.577383	0.0503145	0.0199834	0.0746723	0.0269683	0.607326	0.808806	0.441519	0.875834	0.310226	0.213097	0.384584	0.270554	SMED30015640	OX_Smed_1.0.11331	Oxford	762	smed28631	0	.	.	.	.	.	.	.	.	.
SMED30030597	-0.201499	-0.18976	-0.174034	-0.136695	-0.0947272	-0.158563	-0.132479	-0.0782699	-0.201499		0	0	0	0	0	0	0	0	0.0062785	0.0100509	0.0177801	0.0636221	0.198777	0.0312552	0.0725463	0.283664	0.182249	0.115476	0.126728	0.36951	0.5792	0.266263	0.378702	0.715922	SMED30030597	AsxlX1_comp79281_c0_seq3	AsxlX1	2934	SMEDS2F2_0001516	0	1	.	0	Q11179	4e-153	Putative serine/threonine-protein kinase C05D10.2 [Caenorhabditis elegans]	ELU10754.1	8e-172	hypothetical protein CAPTEDRAFT_1572 [Capitella teleta]
SMED30010213	-1.02055	0.0654714	-0.760042	-0.686428	0.294898	0.0786938	-1.31548	-0.129742	-1.02055		0	0	0	0	0	0	0	0	0.175499	0.917289	0.289296	0.340533	0.632587	0.900703	0.101721	0.84106	0.677257	0.975328	0.601702	0.751953	0.88581	0.97762	0.444899	0.962702	SMED30010213	uniq_smed29047	033226_uniq	651	smed29047	0	.	.	.	.	.	.	.	.	.
SMED30001983	0.136966	0.139979	0.133713	0.0301983	0.190977	0.0895145	0.173828	0.112935	0.136966		0	0	0	0	0	0	0	0	0.161703	0.153007	0.170545	0.761754	0.0524192	0.364087	0.0771411	0.24858	0.663409	0.491117	0.469913	0.940694	0.315967	0.750791	0.391059	0.687306	SMED30001983	OX_Smed_1.0.00987	Oxford	506	SMEDS2F2_0002908	1	1	.	0	.	.	.	.	.	.
SMED30028088	0.718518	0.726256	-0.202012	-0.132586	1.19722	0.497802	-0.107071	1.07865	0.718518		0	0	0	0	0	0	0	0	0.385786	0.380787	0.83153	0.889485	0.124787	0.563176	0.910814	0.166046	0.830055	0.723659	0.940663	0.973593	0.475183	0.86194	0.978864	0.59807	SMED30028088	Sxlregen_comp43696_c0_seq1	Sxlregen	860	NA	NA	1	.	0	.	.	.	.	.	.
SMED30007535	-0.105935	-0.129525	-0.113172	0.0280819	-0.128697	-0.0294341	-0.0324648	0.053537	-0.105935		0	0	0	0	0	0	0	0	0.428628	0.333792	0.397335	0.83329	0.338879	0.825537	0.808377	0.687209	0.851108	0.686954	0.699915	0.960315	0.716947	0.957204	0.94861	0.918029	SMED30007535	AsxlWT_comp59276_c1_seq1	AsxlWT	676	SMEDS2F2_0002032	7	1	.	0	.	.	.	.	.	.
SMED30009703	-0.772106	-0.238689	-0.668805	-0.150574	-0.749617	-0.0852305	0.137958	-0.00815756	-0.772106		0	0	0	0	0	0	0	0	0.0413481	0.489564	0.0702201	0.660476	0.0512363	0.800433	0.673721	0.98025	0.43024	0.792354	0.290808	0.907182	0.31252	0.949405	0.90346	0.996241	SMED30009703	uniq_sm_rc_545238	033226_uniq	702	sm_rc_545238	0	.	.	.	A4Z945	1e-12	Protein ZBED8	XP_004917444.1	5e-18	SCAN domain-containing protein 3-like [Xenopus (Silurana) tropicalis]
SMED30000030	0.771051	0.56478	0.0728284	0.614439	0.294736	0.0129397	0.0674376	-0.157404	0.771051		0	0	0	0	0	0	0	0	0.126487	0.278761	0.896368	0.239088	0.592696	0.981882	0.905827	0.7859	0.615415	0.637225	0.962992	0.661383	0.866167	0.995713	0.977107	0.94952	SMED30000030	Sxlembryo_comp100619_c1_seq25	Sxlembryo	1032	NA	NA	1	.	0	Q7JQ07	3e-16	Mariner Mos1 transposase	XP_005195336.1	8e-39	histone-lysine N-methyltransferase SETMAR-like [Bos taurus]
SMED30026563	-1.2703	-0.0395775	0.0533372	-0.694149	0.176723	-0.960337	-0.666731	-1.00671	-1.2703		0	0	0	0	0	0	0	0	0.0788012	0.946425	0.926164	0.295222	0.759482	0.163771	0.315386	0.143247	0.53632	0.985371	0.974893	0.713474	0.932675	0.55947	0.709441	0.563322	SMED30026563	Sxlembryo_comp100160_c0_seq2	Sxlembryo	3057	NA	NA	1	YES	0	P98160	4e-32	Basement membrane-specific heparan sulfate proteoglycan core protein	GAA55405.1	3e-104	basement membrane-specific heparan sulfate proteoglycan core protein, partial [Clonorchis sinensis]
SMED30008750	-0.0211444	0.0493057	0.0280526	-0.00231928	-0.186561	0.0116952	-0.0839455	-0.0786734	-0.0211444		0	0	0	0	0	0	0	0	0.752242	0.4586	0.67251	0.972497	0.00702883	0.861237	0.217923	0.242052	0.958706	0.769988	0.869036	0.993428	0.104986	0.966221	0.617428	0.682022	SMED30008750	AsxlWT_comp60115_c0_seq1	AsxlWT	1688	SMEDS2F2_0001568	11	1	.	0	Q80Z32	2e-83	Origin recognition complex subunit 1 [Rattus norvegicus]	CAX74040.1	9e-95	origin recognition complex protein 1 [Schistosoma japonicum]
SMED30027990	-0.529757	-0.109967	-0.45558	-0.279408	-0.866473	-0.140134	-0.276077	-0.236212	-0.529757		0	0	0	0	-1	0	0	0	0.0119144	0.580387	0.0281174	0.172823	0.000116208	0.483914	0.179624	0.241154	0.250508	0.838987	0.169398	0.587045	0.00714893	0.819794	0.57259	0.680892	SMED30027990	SxlWT_comp66333_c0_seq1	SxlWT	2191	NA	NA	1	.	0	.	.	.	.	.	.
SMED30003730	-0.00811266	0.0346285	0.0499217	0.0646418	-0.0628777	0.0698789	0.0138786	0.0561336	-0.00811266		0	0	0	0	0	0	0	0	0.887636	0.545844	0.382851	0.259917	0.276914	0.222492	0.809445	0.326568	0.981429	0.823785	0.687707	0.681015	0.658839	0.628653	0.948979	0.747274	SMED30003730	AsxlX1_comp84409_c1_seq13	AsxlX1	4514	SMEDS2F2_0001244	0	2	.	0	Q9HCD5	6e-07	Nuclear receptor coactivator 5	AHA14850.1	4e-179	NCOA5 [Schmidtea mediterranea]
SMED30024660	0.437457	0.831229	0.60916	1.17227	0.902705	1.14858	1.06017	0.607906	0.437457		0	0	0	0	0	0	0	0	0.59826	0.290037	0.449181	0.119544	0.25093	0.127063	0.167866	0.449991	0.910172	0.648574	0.739342	0.502567	0.633995	0.504856	0.555732	0.822276	SMED30024660	Sxlregen_comp20508_c0_seq1	Sxlregen	667	NA	NA	1	.	2	.	.	.	.	.	.
SMED30000564	0.351782	0.30272	0.268155	0.372319	0.272264	0.0805295	-0.255138	-0.459264	0.351782	5	0	0	0	0	0	0	0	0	0.00180948	0.00743811	0.017673	0.000981301	0.0168779	0.481742	0.0296029	0.000101544	0.0877582	0.09565	0.126235	0.0236055	0.174061	0.818462	0.245297	0.00707295	SMED30000564	AsxlX1_comp73451_c0_seq1	AsxlX1	1102	isotig02081	7	1	.	0	.	.	.	.	.	.
SMED30024263	-0.106454	-0.163673	-0.200593	-0.0799432	0.272498	0.249869	-0.175284	-0.028392	-0.106454		0	0	0	0	0	0	0	0	0.679051	0.528311	0.439364	0.7569	0.271276	0.309543	0.504871	0.910863	0.936373	0.814562	0.73212	0.940369	0.653991	0.710039	0.825754	0.979652	SMED30024263	uniq_sm_rc_570220	033226_uniq	1269	rc_smed014875	0	.	.	.	.	.	.	CAR82249.1	2e-14	hypothetical protein [Cotesia congregata]
SMED30035140	-0.238416	-0.383815	-0.154157	0.248317	-0.0118597	-0.243023	0.105187	-0.0323365	-0.238416		0	0	0	0	0	0	0	0	0.144916	0.0218995	0.337504	0.105446	0.941149	0.13904	0.503594	0.837767	0.643296	0.183306	0.648309	0.4744	0.986497	0.524078	0.824565	0.962433	SMED30035140	uniq_sm_rc_509254	033226_uniq	480	sm_rc_509254	0	1	.	0	.	.	.	.	.	.
SMED30021982	0.0464749	-0.0571601	-0.261569	-0.0917406	0.17314	-0.061187	-0.140611	-0.169655	0.0464749		0	0	0	0	0	0	0	0	0.67343	0.606538	0.0195251	0.410362	0.116384	0.581662	0.209173	0.127934	0.934719	0.852156	0.134626	0.796038	0.460216	0.868277	0.607121	0.54225	SMED30021982	AsxlX1_comp69034_c0_seq1	AsxlX1	1306	SMEDS2F2_0001981	4	1	.	0	Q7M3Y3	3e-22	Troponin I	CDJ24935.1	7e-39	troponin i [Echinococcus granulosus]
SMED30009857	-0.000359084	0.0201282	-0.00145067	-0.035787	0.0260031	-0.090214	-0.0739027	-0.11971	-0.000359084		0	0	0	0	0	0	0	0	0.995631	0.758787	0.982334	0.586146	0.692462	0.170159	0.261719	0.0687113	0.999393	0.921776	0.994959	0.87822	0.907796	0.567285	0.6627	0.422078	SMED30009857	AsxlWT_comp40444_c0_seq1	AsxlWT	1667	smed009655	1	1	.	0	Q8BGT5	0	Alanine aminotransferase 2	CDJ13255.1	0	alanine aminotransferase 2 [Hymenolepis microstoma]
SMED30004268	-0.557701	-0.272918	-0.341758	-0.443986	-0.331203	-0.569632	-0.260238	-0.588675	-0.557701		0	0	0	0	0	0	0	0	0.0519968	0.320146	0.214938	0.11833	0.239601	0.0485182	0.348113	0.0401758	0.467728	0.674879	0.523903	0.500969	0.623575	0.332332	0.736952	0.327839	SMED30004268	uniq_sm_547201	033226_uniq	685	sm_547201	0	.	.	.	.	.	.	.	.	.
SMED30024091	0.39169	-0.738128	0.0716462	-0.0821968	-1.76218	-0.38368	0.377773	0.177615	0.39169	2	0	0	0	0	0	0	0	0	0.44177	0.232397	0.89341	0.882731	0.0184801	0.510934	0.465587	0.735345	0.852908	0.588928	0.962496	0.972973	0.183281	0.835817	0.806954	0.935285	SMED30024091	uniq_smed013196	033226_uniq	321	smed013196	0	1	.	1	.	.	.	.	.	.
SMED30009518	0.444643	0.0269461	-0.342051	-0.390119	0.293325	0.316045	0.200856	-0.47437	0.444643		0	0	0	0	0	0	0	0	0.417876	0.962886	0.57219	0.527808	0.604618	0.572484	0.726258	0.441994	0.846895	0.990617	0.821238	0.859426	0.871397	0.864721	0.921863	0.818668	SMED30009518	Sxlembryo_comp74586_c0_seq1	Sxlembryo	445	SMEDS2F2_0000003	0	1	.	0	Q28987	4e-10	Cystatin-A8	XP_003379766.1	1e-09	cystatin-B [Trichinella spiralis]
SMED30023276	-0.0395859	-0.222797	-0.293677	-0.133144	-0.0589622	-0.0445623	-0.236658	-0.0629116	-0.0395859		0	0	0	0	0	0	0	0	0.812501	0.191831	0.0864155	0.433179	0.727748	0.790121	0.17038	0.706101	0.970761	0.544287	0.325127	0.808585	0.920985	0.945782	0.558905	0.925397	SMED30023276	Sxlembryo_comp79546_c0_seq1	Sxlembryo	908	SMEDS2F2_0002331	0	1	.	0	Q8N3R3	5e-18	T-cell activation inhibitor, mitochondrial	XP_005278752.1	3e-21	T-cell activation inhibitor, mitochondrial isoform X1 [Chrysemys picta bellii]
SMED30002330	0.176265	0.305791	0.604499	0.346688	0.359137	0.304975	0.442272	0.288082	0.176265		0	0	1	0	0	0	0	0	0.0989041	0.00418797	1.51873e-08	0.00117157	0.000776798	0.00429257	3.47416e-05	0.00697262	0.573569	0.0651098	1.87628e-06	0.0273285	0.0263208	0.0883862	0.00281885	0.128263	SMED30002330	AsxlWT_comp48788_c0_seq1	AsxlWT	797	SMEDS2F2_0002817	2	1	YES	0	Q26551	4e-49	Peptidyl-prolyl cis-trans isomerase B	EKC29243.1	9e-76	Peptidyl-prolyl cis-trans isomerase B [Crassostrea gigas]
SMED30003857	-0.163719	-0.269142	-0.256105	-0.161116	-0.0881254	-0.233452	-0.270311	-0.216758	-0.163719		0	0	0	0	0	0	0	0	0.0369149	0.000658292	0.00114596	0.0406839	0.262249	0.00308572	0.000658607	0.005822	0.41195	0.0176595	0.0193819	0.294377	0.645251	0.0712331	0.022905	0.115292	SMED30003857	Sxlembryo_comp100408_c0_seq1	Sxlembryo	5464	SMEDS2F2_0002692	0	1	.	0	Q5TB80	1e-26	Centrosomal protein of 162 kDa	XP_005108769.1	1e-31	centrosomal protein of 162 kDa-like [Aplysia californica]
SMED30004226	-0.150357	0.116502	-0.118231	-0.263473	-0.0346029	0.0165329	-0.0944206	0.0223871	-0.150357		0	0	0	0	0	0	0	0	0.549643	0.629673	0.634593	0.307025	0.890319	0.946393	0.708348	0.926776	0.898645	0.864332	0.850192	0.722919	0.973034	0.987989	0.914849	0.983515	SMED30004226	OX_Smed_1.0.12373	Oxford	649	NA	NA	.	.	.	.	.	.	.	.	.
SMED30031094	-0.130227	-0.0428781	-0.0540855	-0.0301944	0.21032	-0.086134	-0.0352015	-0.0376346	-0.130227		0	0	0	0	0	0	0	0	0.294431	0.728773	0.661269	0.807519	0.0866308	0.487421	0.776669	0.760286	0.774601	0.910514	0.863766	0.952069	0.39945	0.821847	0.937794	0.942493	SMED30031094	dd_smedV4_3541_0_1	Dresden	433	smed014400	1	1	.	1	.	.	.	.	.	.
SMED30020762	0.668323	0.797003	0.577483	0.396673	0.414858	0.942584	0.563173	0.685055	0.668323	3	1	1	1	0	0	1	1	1	0.000930565	5.61797e-05	0.00461469	0.0625703	0.0526733	1.12068e-06	0.00681678	0.000629993	0.0562102	0.00251352	0.051779	0.365808	0.316451	0.000211597	0.106058	0.0259083	SMED30020762	OX_Smed_1.0.22287	Oxford	584	smed28869	0	.	.	.	.	.	.	.	.	.
SMED30004602	-0.432392	-0.0011861	-0.401242	-0.320997	-0.401786	-0.248662	-0.512327	-0.0380777	-0.432392		0	0	0	0	0	0	0	0	0.0527461	0.995441	0.0690199	0.146367	0.0757991	0.252028	0.0258482	0.854245	0.469096	0.999667	0.288024	0.546894	0.373291	0.660459	0.227989	0.966296	SMED30004602	berlin_CUFF.141019.1	Berlin	735	NA	NA	.	.	.	.	.	.	.	.	.
SMED30021539	0.0495025	-0.0933818	-0.00301555	0.0681736	0.00273854	-0.0995238	-0.112312	-0.0199981	0.0495025		0	0	0	0	0	0	0	0	0.617144	0.356657	0.97577	0.493387	0.978416	0.327391	0.274387	0.840955	0.915371	0.704778	0.992458	0.843424	0.996001	0.722373	0.672328	0.962702	SMED30021539	Sxlembryo_comp97504_c0_seq24	Sxlembryo	2502	SMEDS2F2_0001723	0	2	.	4	Q6WQJ1	3e-37	Sn1-specific diacylglycerol lipase alpha	XP_007891773.1	1e-42	sn1-specific diacylglycerol lipase beta [Callorhinchus milii]
SMED30025097	-0.0919125	-0.0597494	-0.0964837	-0.00183349	-0.0942012	-0.06502	-0.0886919	-0.00980428	-0.0919125		0	0	0	0	0	0	0	0	0.106644	0.293606	0.089844	0.974281	0.100177	0.253544	0.12091	0.862666	0.586795	0.6519	0.332086	0.993813	0.430063	0.661134	0.479566	0.968254	SMED30025097	Sxlembryo_comp98062_c0_seq11	Sxlembryo	6528	SMEDS2F2_0001182	0	3	YES	2	O75077	1e-55	Disintegrin and metalloproteinase domain-containing protein 23	CDJ22960.1	8e-129	adam [Echinococcus granulosus]
SMED30017083	0.38598	0.00677715	0.237652	0.503437	-0.0654508	-0.741046	0.217127	0.0429451	0.38598		0	0	0	0	0	0	0	0	0.411327	0.988981	0.618295	0.280996	0.897386	0.179188	0.654865	0.930059	0.843368	0.997208	0.84215	0.703744	0.974751	0.578343	0.89644	0.984069	SMED30017083	uniq_sm_492273	033226_uniq	362	sm_492273	0	.	.	.	.	.	.	.	.	.
SMED30020423	0.155075	0.165481	0.182632	0.118679	-0.0319937	0.120362	0.150273	0.0751893	0.155075		0	0	0	0	0	0	0	0	0.0903679	0.0707831	0.044942	0.198798	0.734064	0.190974	0.103503	0.413736	0.557643	0.34076	0.226884	0.619934	0.923261	0.591741	0.447666	0.801185	SMED30020423	AsxlX1_comp81244_c0_seq10	AsxlX1	2235	SMEDS2F2_0000931	0	1	.	2	Q9VCR7	1e-26	Cystinosin homolog	NP_001018407.1	5e-29	cystinosin precursor [Danio rerio]
SMED30012137	0.411926	0.655801	0.425046	0.711473	0.616464	0.643808	0.760085	0.595365	0.411926	3	0	1	0	1	1	1	1	1	0.00528696	4.59049e-06	0.0037957	6.45724e-07	2.28687e-05	7.35735e-06	9.51661e-08	3.42383e-05	0.166723	0.000311086	0.0451827	4.78649e-05	0.00229907	0.000956169	2.0407e-05	0.0029284	SMED30012137	uniq_smed003324	033226_uniq	852	smed003324	0	.	.	.	.	.	.	.	.	.
SMED30025136	0.485955	0.579127	0.755416	0.738852	0.38737	0.530708	0.548667	0.42777	0.485955	3	0	1	1	1	0	1	1	0	0.00107595	8.0406e-05	1.20141e-07	3.22422e-07	0.011284	0.000340704	0.000230087	0.00418601	0.0623576	0.00339879	1.12711e-05	2.62315e-05	0.138337	0.0172193	0.0109468	0.0939223	SMED30025136	Asxlsort_comp80463_c0_seq2	Asxlsort	1348	NA	NA	2	.	0	Q49AG3	6e-54	Zinc finger BED domain-containing protein 5	XP_003412050.1	1e-52	zinc finger BED domain-containing protein 5-like [Loxodonta africana]
SMED30020088	-0.519874	-0.227049	-0.660516	-0.472533	-0.17301	-0.396852	-0.865071	-0.221817	-0.519874		0	0	0	0	0	0	0	0	0.170666	0.533186	0.0864609	0.21363	0.637443	0.288722	0.0326485	0.540171	0.672643	0.817346	0.32516	0.635369	0.888555	0.692919	0.257932	0.863818	SMED30020088	SRG12_144811_c0s1	SRG12	389	NA	NA	1	.	1	.	.	.	.	.	.
SMED30015381	-0.0279169	-0.188951	-0.200887	-0.260476	0.0296372	-0.142086	-0.00324367	-0.0520042	-0.0279169		0	0	0	0	0	0	0	0	0.666532	0.00407463	0.00219862	9.05608e-05	0.648968	0.0302721	0.960268	0.42223	0.932574	0.0638104	0.0310443	0.00325596	0.892014	0.261751	0.991705	0.807077	SMED30015381	AsxlX1_comp79150_c0_seq5	AsxlX1	1825	SMEDS2F2_0000896	1	1	.	0	Q23424	1e-05	Transmembrane GTPase fzo-1 [Caenorhabditis elegans]	XP_002591612.1	5e-06	hypothetical protein BRAFLDRAFT_223384 [Branchiostoma floridae]
SMED30025155	-0.459938	0.647824	0.163598	0.237171	-0.0105246	-0.0773089	0.264201	0.613284	-0.459938		0	0	0	0	0	0	0	0	0.614635	0.398738	0.842537	0.774023	0.990318	0.928712	0.749359	0.423992	0.914332	0.73695	0.9437	0.943674	0.997065	0.984678	0.929173	0.807077	SMED30025155	SxlWT_comp20798_c0_seq1	SxlWT	762	smed018526	1	1	.	2	.	.	.	.	.	.
SMED30029372	-0.0450241	-0.047674	-0.00785263	0.00627883	-0.0896388	-0.208059	-0.286632	-0.235795	-0.0450241		0	0	0	0	0	0	0	0	0.733703	0.718812	0.952632	0.962173	0.499958	0.117463	0.0316041	0.0759819	0.95462	0.906579	0.985144	0.991636	0.82116	0.490864	0.253873	0.44138	SMED30029372	AsxlX1_comp79252_c1_seq1	AsxlX1	3601	SMEDS2F2_0001475	0	3	.	0	Q9WU20	5e-149	Methylenetetrahydrofolate reductase [Mus musculus]	ELU06114.1	2e-153	hypothetical protein CAPTEDRAFT_181552 [Capitella teleta]
SMED30032789	-0.0998897	-0.131981	0.207331	0.271473	-0.101098	-0.0796829	0.0567569	0.0404056	-0.0998897		0	0	0	0	0	0	0	0	0.396024	0.262858	0.073931	0.0193614	0.393053	0.498297	0.628321	0.729364	0.835667	0.622586	0.298704	0.194677	0.752034	0.828545	0.883634	0.933019	SMED30032789	AsxlWT_comp62152_c0_seq2	AsxlWT	1816	smed022691	0	3	.	0	P34457	1e-11	Putative uncharacterized transposon-derived protein F54H12.3	ACE75265.1	3e-29	integrase core domain-containing protein [Glyptapanteles flavicoxis]
SMED30003944	0.0898386	0.0818008	0.0471705	0.0165818	0.238357	0.108692	0.0790332	0.0856836	0.0898386		0	0	0	0	0	0	0	0	0.133965	0.172541	0.431415	0.782609	6.99453e-05	0.0698257	0.188131	0.152805	0.629071	0.519596	0.725765	0.945217	0.00515928	0.395442	0.58352	0.578992	SMED30003944	Sxlembryo_comp95161_c0_seq1	Sxlembryo	965	SMEDS2F2_0001250	2	1	.	0	Q9BUP0	8e-47	EF-hand domain-containing protein D1	XP_008277200.1	9e-48	EF-hand domain-containing protein D1 [Stegastes partitus]
SMED30032967	-0.0701164	-0.199434	-0.0893855	-0.00191471	-0.0476036	0.0503213	-0.148836	-0.0380798	-0.0701164		0	0	0	0	0	0	0	0	0.576953	0.117354	0.476545	0.987823	0.70718	0.686172	0.243769	0.760609	0.907128	0.436838	0.755693	0.99806	0.913404	0.911485	0.644433	0.942493	SMED30032967	AsxlWT_comp58941_c0_seq1	AsxlWT	2842	SMEDS2F2_0002826	0	1	.	5	Q9NR82	1e-152	Potassium voltage-gated channel subfamily KQT member 5	ELU11555.1	0	hypothetical protein CAPTEDRAFT_183094 [Capitella teleta]
SMED30026820	-0.00556331	-0.106733	-0.527844	-0.309572	-0.230389	-0.0633351	-0.0356013	-0.139202	-0.00556331		0	0	0	0	0	0	0	0	0.983866	0.703075	0.076303	0.288351	0.427383	0.820258	0.898909	0.618894	0.998873	0.898283	0.303439	0.709654	0.776474	0.954984	0.975438	0.89019	SMED30026820	uniq_sm_521966	033226_uniq	514	sm_521966	0	.	.	.	.	.	.	.	.	.
SMED30015868	-0.617875	-0.866846	-0.648902	-0.206906	0.0921312	-0.0206675	-0.482898	-0.238339	-0.617875		0	0	0	0	0	0	0	0	0.0824404	0.0198549	0.0679317	0.53593	0.773429	0.948804	0.171252	0.471708	0.542013	0.173926	0.28546	0.863098	0.934672	0.98851	0.56016	0.830527	SMED30015868	uniq_sm_rc_93654	033226_uniq	437	sm_rc_93654	0	.	.	.	.	.	.	.	.	.
SMED30006518	-0.075738	-0.0958142	-0.215226	-0.182081	0.0886834	-0.104924	-0.128422	-0.101702	-0.075738		0	0	0	0	0	0	0	0	0.417019	0.305857	0.0223595	0.0545418	0.339524	0.263075	0.173954	0.276242	0.846713	0.663833	0.146979	0.341695	0.717483	0.670382	0.564686	0.708808	SMED30006518	SxlWT_comp47016_c0_seq2	SxlWT	773	SMEDS2F2_0001877	1	1	.	0	Q9ERU9	5e-26	E3 SUMO-protein ligase RanBP2	EFX80323.1	2e-32	hypothetical protein DAPPUDRAFT_304059 [Daphnia pulex]
SMED30025372	0.34733	-0.0781952	-0.439424	-0.0393353	0.450775	-1.04738	-0.275612	0.212864	0.34733		0	0	0	0	0	0	0	0	0.332832	0.837903	0.272421	0.918109	0.20937	0.0182103	0.488429	0.558857	0.798373	0.949033	0.58624	0.980721	0.592927	0.203156	0.816705	0.872417	SMED30025372	uniq_isotig02408	033226_uniq	723	isotig02408	0	.	.	.	.	.	.	.	.	.
SMED30025731	0.249594	0.229391	0.171688	0.178367	0.257178	0.19916	0.14436	-0.00501708	0.249594		0	0	0	0	0	0	0	0	0.00454975	0.00940313	0.0524686	0.046367	0.00392004	0.0250415	0.110126	0.955981	0.153642	0.110399	0.248018	0.315089	0.0742483	0.238151	0.460238	0.989887	SMED30025731	uniq_SMEDS2F2_00002287-RA_1_247	033226_uniq	247	SMEDS2F2_0000228	0	1	.	0	Q9VHI4	4e-40	Probable splicing factor 3B subunit 5	CAX70471.1	3e-40	putative splicing factor 3B subunit 5 [Schistosoma japonicum]
SMED30009134	0.114235	0.0997507	0.124158	-0.0850752	-0.0329911	0.0410876	0.0539455	-0.0420323	0.114235		0	0	0	0	0	0	0	0	0.166097	0.227812	0.130468	0.316482	0.697767	0.622113	0.519827	0.615599	0.668687	0.584233	0.4077	0.732033	0.909122	0.88503	0.833238	0.889503	SMED30009134	Asxlregen_comp48800_c0_seq1	Asxlregen	553	SMEDS2F2_0003273	1	1	.	0	Q9NZE8	0.0001	39S ribosomal protein L35, mitochondrial	CDJ23912.1	4e-12	Ribosomal protein L35 mitochondrial [Echinococcus granulosus]
SMED30030189	0.079989	0.117792	0.177481	0.0609987	-0.134867	-0.0650608	0.0681301	0.051393	0.079989		0	0	0	0	0	0	0	0	0.329333	0.149024	0.0272189	0.461985	0.117942	0.439726	0.412979	0.530867	0.796415	0.485707	0.166187	0.825851	0.462734	0.795169	0.774601	0.861065	SMED30030189	AsxlWT_comp45580_c0_seq1	AsxlWT	1306	SMEDS2F2_0000880	9	1	.	0	A1L112	1e-34	WD repeat-containing protein 55	CDJ22930.1	6e-58	WD repeat containing protein 55 [Echinococcus granulosus]
SMED30022898	-0.204995	-0.267008	-0.0118008	0.125656	-0.0251186	0.387556	-0.0360387	0.528711	-0.204995		0	0	0	0	0	0	0	0	0.580792	0.474893	0.974053	0.727654	0.945692	0.271458	0.921977	0.128482	0.907128	0.782865	0.99176	0.930174	0.987294	0.676921	0.981205	0.542878	SMED30022898	uniq_sm_496430	033226_uniq	344	sm_496430	0	.	.	.	.	.	.	.	.	.
SMED30010596	-0.286607	-0.280002	-0.870373	-0.0435195	0.689065	-0.814874	0.351487	0.0389767	-0.286607		0	0	0	0	0	0	0	0	0.682057	0.689113	0.239418	0.949997	0.290991	0.271349	0.597391	0.955066	0.937528	0.892333	0.552592	0.988419	0.672849	0.676872	0.870388	0.989887	SMED30010596	Sxlembryo_comp44900_c0_seq1	Sxlembryo	485	SMEDS2F2_0003450	2	2	.	3	P22001	4e-39	Potassium voltage-gated channel subfamily A member 3	CCD75136.1	4e-57	putative voltage-gated potassium channel [Schistosoma mansoni]
SMED30028924	0.416383	0.137816	0.336425	0.272652	-0.0712948	0.0968201	0.25656	0.221026	0.416383		0	0	0	0	0	0	0	0	0.0257482	0.473607	0.072915	0.152382	0.720444	0.61681	0.18	0.244804	0.348881	0.781723	0.296333	0.556869	0.918328	0.883267	0.572829	0.68441	SMED30028924	AsxlWT_comp51065_c0_seq3	AsxlWT	757	SMEDS2F2_0001207	1	1	.	0	.	.	.	CDJ07494.1	0.0007	expressed conserved protein [Hymenolepis microstoma]
SMED30033540	0.000267798	0.149335	0.00112052	-0.0727433	-0.0445345	-0.0220823	-0.0534962	-0.2007	0.000267798		0	0	0	0	0	0	0	0	0.998097	0.17827	0.992024	0.524811	0.697892	0.845457	0.640428	0.0813013	0.999551	0.52555	0.99744	0.85838	0.909162	0.962878	0.8892	0.452948	SMED30033540	AsxlX1_comp74404_c0_seq2	AsxlX1	863	SMEDS2F2_0000047	7	1	.	0	A7STV9	3e-54	Structure-specific endonuclease subunit SLX1 homolog [Nematostella vectensis]	KDR08427.1	2e-60	Structure-specific endonuclease subunit slx1, partial [Zootermopsis nevadensis]
SMED30026128	0.334232	-0.194532	-0.0335833	0.164954	-0.190696	-0.0195811	-0.272097	-0.158048	0.334232		0	0	0	0	0	0	0	0	0.344423	0.608281	0.92749	0.650863	0.620281	0.957914	0.482451	0.673745	0.80363	0.85303	0.975347	0.903783	0.879449	0.9907	0.81465	0.912419	SMED30026128	uniq_sm_rc_676188	033226_uniq	635	sm_rc_676188	0	.	.	.	.	.	.	.	.	.
SMED30001724	0.69314	0.653585	0.239246	0.594286	0.303214	1.21357	0.723216	0.91692	0.69314		0	0	0	0	0	1	0	0	0.0828173	0.104573	0.576545	0.146546	0.484429	0.000980817	0.0725422	0.0168116	0.542377	0.412031	0.823624	0.547113	0.814747	0.0355617	0.378702	0.210701	SMED30001724	uniq_smed019137	033226_uniq	309	smed019137	0	.	.	.	.	.	.	.	.	.
SMED30023250	-0.0858348	-0.107703	-0.0523896	-0.150285	-0.199512	0.00189152	-0.198885	-0.0684121	-0.0858348		0	0	0	0	0	0	0	0	0.327618	0.221021	0.547206	0.09091	0.0266291	0.982663	0.0265801	0.433258	0.794846	0.577421	0.802847	0.441334	0.222745	0.99581	0.231498	0.814352	SMED30023250	Sxlregen_comp9669_c0_seq1	Sxlregen	5057	smed022457	16	2	.	0	.	.	.	CCD80739.1	1e-05	hypothetical protein Smp_011010 [Schistosoma mansoni]
SMED30022363	-0.0348123	-0.0914681	-0.120388	-0.130383	-0.0829027	-0.204732	-0.0891778	-0.237606	-0.0348123		0	0	0	0	0	0	0	0	0.771372	0.450338	0.319326	0.288871	0.500367	0.0984737	0.467444	0.054253	0.963391	0.76425	0.631312	0.709848	0.821207	0.456646	0.807959	0.378686	SMED30022363	berlin_isotig19319	Berlin	796	NA	NA	.	.	.	.	.	.	.	.	.
SMED30004239	-0.032819	0.0285942	-0.207367	-0.23997	0.257422	0.215428	0.17305	0.120872	-0.032819		0	0	0	0	0	0	0	0	0.874213	0.889664	0.324763	0.261031	0.206241	0.287496	0.397591	0.552987	0.978865	0.965807	0.636612	0.682137	0.589225	0.691802	0.764144	0.870492	SMED30004239	uniq_sm_rc_344621	033226_uniq	434	sm_rc_344621	0	1	.	0	.	.	.	.	.	.
SMED30026985	-0.280685	-0.231153	0.055211	0.167252	-0.0645368	0.232862	0.0284879	-0.0776313	-0.280685		0	0	0	0	0	0	0	0	0.377339	0.464062	0.853041	0.572868	0.836045	0.424839	0.925748	0.799223	0.824904	0.774028	0.947154	0.873456	0.955389	0.786623	0.981636	0.953514	SMED30026985	uniq_sm_rc_680479	033226_uniq	333	isotig18330	0	.	.	.	.	.	.	.	.	.
SMED30025660	0.148895	0.0382914	0.124023	0.143711	0.0412349	0.115058	0.139229	0.0682546	0.148895		0	0	0	0	0	0	0	0	0.233976	0.761954	0.321135	0.253032	0.74635	0.360045	0.269481	0.587492	0.73062	0.922613	0.633183	0.675644	0.927313	0.747292	0.667988	0.882988	SMED30025660	uniq_sm_rc_116377	033226_uniq	1600	sm_rc_116377	0	.	.	.	.	.	.	.	.	.
SMED30012816	0.110228	0.201654	0.209099	0.125887	0.184287	0.0531873	0.0526655	-0.0488045	0.110228		0	0	0	0	0	0	0	0	0.107031	0.00310569	0.00212152	0.0661953	0.00717625	0.438226	0.443874	0.478048	0.587352	0.0535793	0.0302998	0.377515	0.106232	0.794502	0.79524	0.832247	SMED30012816	AsxlX1_comp80968_c2_seq26	AsxlX1	3107	SMEDS2F2_0001795	2	3	.	0	Q8CFA2	2e-60	Aminomethyltransferase, mitochondrial	CAF93361.1	3e-66	unnamed protein product [Tetraodon nigroviridis]
SMED30033647	-0.0200118	0.198116	-0.00210984	-0.187417	0.562006	0.432841	0.331654	0.0485803	-0.0200118		0	0	0	0	0	0	0	0	0.938184	0.425711	0.993419	0.484747	0.0177275	0.0704325	0.177715	0.848088	0.990034	0.753372	0.998034	0.839733	0.17924	0.397207	0.569629	0.964905	SMED30033647	berlin_isotig24151	Berlin	437	NA	NA	.	.	.	.	.	.	.	.	.
SMED30025147	-0.292104	0.284492	-0.93222	-0.8556	-0.971088	-0.270471	-0.551089	-0.319763	-0.292104		0	0	0	0	0	0	0	0	0.546863	0.51757	0.0829244	0.112732	0.0806177	0.577167	0.284527	0.509258	0.89746	0.809599	0.317394	0.488189	0.385448	0.866497	0.681538	0.849169	SMED30025147	AsxlX1_comp41861_c0_seq1	AsxlX1	622	NA	NA	1	.	1	.	.	.	.	.	.
SMED30002705	-0.03429	-0.257139	-0.338308	-0.213643	-0.101455	-0.290792	-0.388682	-0.362568	-0.03429		0	0	0	0	0	0	0	0	0.729675	0.0104104	0.000767624	0.0333149	0.310738	0.0038413	0.000127614	0.000318499	0.954103	0.118191	0.0144845	0.265925	0.692943	0.0819416	0.00729736	0.0166001	SMED30002705	AsxlWT_comp57162_c0_seq1	AsxlWT	1315	SMEDS2F2_0001353	4	1	YES	0	.	.	.	.	.	.
SMED30004250	-0.0968283	-0.0726474	-0.0895637	-0.0459896	0.0499567	-0.08835	0.0180849	-0.0650096	-0.0968283		0	0	0	0	0	0	0	0	0.187895	0.322507	0.221217	0.531988	0.495283	0.230199	0.805035	0.373768	0.68858	0.677394	0.531122	0.861407	0.819283	0.636472	0.947509	0.780965	SMED30004250	AsxlWT_comp60308_c2_seq2	AsxlWT	1457	SMEDS2F2_0000709	13	1	.	0	B6CJY5	4e-07	TNF receptor-associated factor 6	AFJ24792.1	7e-28	TNF receptor associated factor-2, partial [Schmidtea mediterranea]
SMED30019288	0.0246793	-0.0225456	-0.0139757	-0.109152	0.169655	-0.00116117	0.0129988	-0.0351945	0.0246793		0	0	0	0	0	0	0	0	0.710433	0.734731	0.833492	0.101756	0.0107005	0.986074	0.845196	0.596777	0.948201	0.912314	0.941111	0.466655	0.133906	0.996153	0.959683	0.886049	SMED30019288	dd_smedV4_1417_0_1	Dresden	1292	SMEDS2F2_0000873	1	1	YES	0	Q6XLQ7	4e-84	Calumenin	XP_006771459.1	3e-83	calumenin isoform X1 [Myotis davidii]
SMED30020268	-0.0793346	0.0111656	0.106435	-0.0145908	0.00746176	-0.0428806	-0.079146	0.0861022	-0.0793346		0	0	0	0	0	0	0	0	0.125631	0.82881	0.0383835	0.778131	0.885571	0.407506	0.127714	0.0942892	0.614731	0.946216	0.20533	0.944417	0.971108	0.779827	0.492104	0.482553	SMED30020268	Sxlembryo_comp99673_c0_seq10	Sxlembryo	3959	SMEDS2F2_0002148	0	4	.	1	Q7YU24	1e-28	Transmembrane GTPase Marf	XP_002106302.1	5e-28	GD16797 [Drosophila simulans]
SMED30005084	-0.0849013	-0.107244	-0.381655	-0.10429	-0.107581	-0.0763503	0.0503727	0.119348	-0.0849013		0	0	0	0	0	0	0	0	0.627576	0.54093	0.0329096	0.553279	0.54268	0.662906	0.772398	0.488088	0.917735	0.820911	0.186799	0.866759	0.842981	0.901738	0.936404	0.838651	SMED30005084	AsxlX1_comp83417_c1_seq10	AsxlX1	2455	SMEDS2F2_0002324	0	2	YES	0	O60290	0.0008	Zinc finger protein 862 [Homo sapiens]	XP_002772214.1	9e-08	hypothetical protein Pmar_PMAR015367 [Perkinsus marinus ATCC 50983]
SMED30021420	-0.00870958	0.258217	0.0948985	0.27299	0.189725	0.479058	-0.171901	0.15454	-0.00870958		0	0	0	0	0	0	0	0	0.965753	0.190454	0.634904	0.167619	0.34495	0.0131348	0.410345	0.437109	0.994946	0.541853	0.850385	0.58	0.720072	0.170113	0.773793	0.816954	SMED30021420	dd_smedV4_18626_0_1	Dresden	1478	NA	NA	1	.	0	.	.	.	XP_008178763.1	5e-05	uncharacterized protein LOC103307980 [Acyrthosiphon pisum]
SMED30012107	-0.0845215	-0.0379798	0.0461304	0.000321438	-0.0656563	-0.126696	-0.0498879	-0.0573488	-0.0845215		0	0	0	0	0	0	0	0	0.23471	0.592134	0.510625	0.99638	0.359908	0.0765756	0.484849	0.418115	0.731619	0.844889	0.7772	0.99987	0.730264	0.411181	0.815169	0.804471	SMED30012107	AsxlWT_comp41706_c0_seq1	AsxlWT	1207	SMEDS2F2_0001014	1	1	.	0	Q9H0C1	2e-96	Zinc finger MYND domain-containing protein 12 [Homo sapiens]	EKC24412.1	1e-132	Zinc finger MYND domain-containing protein 12 [Crassostrea gigas]
SMED30035509	0.197836	-0.531851	-0.92917	0.0367573	-0.161138	0.0120218	-0.469049	0.171059	0.197836		0	0	0	0	0	0	0	0	0.78254	0.510677	0.276991	0.960524	0.835179	0.987072	0.563334	0.811221	0.96505	0.805318	0.590623	0.991241	0.955036	0.996153	0.852655	0.956198	SMED30035509	Asxlregen_comp67965_c0_seq3	Asxlregen	396	NA	NA	1	.	0	Q95M72	1e-07	Baculoviral IAP repeat-containing protein 8	XP_005146907.1	9e-07	baculoviral IAP repeat-containing protein 7 [Melopsittacus undulatus]
SMED30020140	-0.255917	-0.30192	-0.233623	-0.48087	-0.214003	-0.0171953	-0.0726896	0.207762	-0.255917		0	0	0	0	0	0	0	0	0.263462	0.190814	0.303324	0.0441604	0.354576	0.938125	0.747174	0.328959	0.752556	0.542567	0.615526	0.308168	0.726305	0.986288	0.929173	0.749291	SMED30020140	uniq_sm_rc_609586	033226_uniq	471	sm_rc_609586	0	.	.	.	.	.	.	.	.	.
SMED30015718	-0.695096	-0.818329	-0.391222	-0.126471	-0.602052	0.475815	-0.751223	-0.491378	-0.695096		0	0	0	0	0	0	0	0	0.171081	0.115253	0.414126	0.785553	0.237467	0.253419	0.149354	0.31361	0.672643	0.433844	0.713111	0.945783	0.622065	0.661134	0.529483	0.736141	SMED30015718	uniq_sm_106477	033226_uniq	489	sm_106477	0	.	.	.	.	.	.	.	.	.
SMED30031060	0.0559375	0.219733	0.288765	0.16654	-0.0344823	-0.633779	-0.739188	-0.669991	0.0559375		0	0	0	0	0	0	0	0	0.928357	0.71667	0.631028	0.785188	0.955354	0.343507	0.279824	0.316055	0.988865	0.90571	0.848259	0.945783	0.989197	0.737023	0.677358	0.737699	SMED30031060	uniq_sm_rc_489263	033226_uniq	305	sm_rc_489263	0	.	.	.	.	.	.	.	.	.
SMED30034194	-0.190956	0.0717324	-0.695023	-0.0365476	-1.08419	-0.559643	-0.467543	-0.186422	-0.190956		0	0	0	0	-1	0	0	0	0.55392	0.81822	0.0433918	0.908674	0.00356128	0.100144	0.167625	0.561802	0.901166	0.941877	0.222253	0.977163	0.0701234	0.459558	0.555314	0.873834	SMED30034194	uniq_sm_565016	033226_uniq	358	sm_565016	0	.	.	.	.	.	.	.	.	.
SMED30000931	0.149629	0.219807	-0.0609983	0.501383	0.203281	0.273482	0.309751	0.242263	0.149629		0	0	0	0	0	0	0	0	0.538777	0.361369	0.808082	0.029859	0.407662	0.252817	0.196997	0.30927	0.893675	0.708361	0.931035	0.250995	0.762898	0.661134	0.594376	0.733323	SMED30000931	uniq_sm_465458	033226_uniq	692	sm_465458	0	.	.	.	.	.	.	.	.	.
SMED30014587	0.0357297	0.0778664	0.124048	-0.0238988	0.0732868	-0.0206689	0.0148258	0.0277111	0.0357297		0	0	0	0	0	0	0	0	0.620398	0.27865	0.081149	0.743758	0.313899	0.776538	0.839113	0.700284	0.916493	0.637117	0.313581	0.936427	0.695387	0.942236	0.957628	0.923407	SMED30014587	AsxlWT_comp42445_c0_seq1	AsxlWT	1111	SMEDS2F2_0000566	1	1	.	0	P59941	5e-104	NAD-dependent protein deacetylase sirtuin-6	XP_005094298.1	7e-112	NAD-dependent protein deacetylase sirtuin-6-like [Aplysia californica]
SMED30022967	-0.0178841	-0.920586	-0.55881	-0.315157	-0.192342	-1.02759	-0.138013	-0.242922	-0.0178841		0	0	0	0	0	0	0	0	0.96443	0.0499841	0.201738	0.45973	0.647892	0.0322131	0.739878	0.55806	0.994946	0.285606	0.509552	0.82437	0.891887	0.271344	0.927141	0.87193	SMED30022967	Sxlregen_comp34169_c0_seq2	Sxlregen	844	NA	NA	2	.	2	.	.	.	.	.	.
SMED30003920	0.00682035	0.00147317	-0.0347886	-0.047455	-0.013678	0.0316022	-0.0354079	-0.0723882	0.00682035		0	0	0	0	0	0	0	0	0.874471	0.972807	0.420605	0.275228	0.753478	0.464076	0.415959	0.0949323	0.978933	0.993929	0.717605	0.698561	0.930223	0.808765	0.776296	0.484365	SMED30003920	AsxlWT_comp55448_c0_seq1	AsxlWT	3131	smed001263	5	1	.	0	Q6GQD0	1e-150	Nuclear cap-binding protein subunit 1-B	BAF57613.1	0	cap binding protein 80 [Dugesia japonica]
SMED30025289	-0.606447	-0.248077	-1.10134	-0.13169	-0.729494	-0.016215	-0.433003	0.0559174	-0.606447		0	0	0	0	0	0	0	0	0.208925	0.587	0.0339551	0.770653	0.145567	0.970719	0.363299	0.896905	0.706915	0.842151	0.189999	0.942855	0.506029	0.994008	0.743528	0.97631	SMED30025289	uniq_sm_538253	033226_uniq	807	sm_538253	0	.	.	.	.	.	.	.	.	.
SMED30021568	-0.10768	0.144554	0.0684657	0.34652	-0.158352	0.141531	0.608481	-0.0611353	-0.10768		0	0	0	0	0	0	0	0	0.737138	0.642347	0.826881	0.257587	0.628464	0.650259	0.041361	0.84752	0.955882	0.869898	0.938791	0.680418	0.883634	0.896959	0.291069	0.964751	SMED30021568	Sxlregen_comp23322_c0_seq1	Sxlregen	352	NA	NA	1	.	0	Q80TC5	0.0003	Pogo transposable element with KRAB domain	XP_003737354.1	1e-07	pogo transposable element with KRAB domain-like [Metaseiulus occidentalis]
SMED30014328	-0.262855	-0.0430703	-0.0976138	-0.04052	0.176883	-0.0986493	-0.00450097	-0.280576	-0.262855	4	0	0	0	0	0	0	0	0	0.0753153	0.764206	0.497177	0.779	0.210388	0.495999	0.975116	0.0571902	0.529826	0.923485	0.767615	0.944417	0.5943	0.826968	0.993631	0.38856	SMED30014328	OX_Smed_1.0.11871	Oxford	355	NA	NA	1	.	0	.	.	.	.	.	.
SMED30007212	0.0867588	0.268899	-0.15131	0.261099	0.670119	0.684693	-0.464333	0.244505	0.0867588		0	0	0	0	0	0	0	0	0.853949	0.558794	0.754756	0.573696	0.130222	0.117639	0.367882	0.595296	0.977267	0.83142	0.909567	0.873456	0.484674	0.491089	0.743528	0.886016	SMED30007212	OX_Smed_1.0.00702	Oxford	1013	smed28328	0	.	.	.	.	.	.	.	.	.
SMED30028658	-0.071211	-0.033448	-0.0310936	-0.142864	-0.0307921	-0.0747042	-0.0553013	-0.118182	-0.071211		0	0	0	0	0	0	0	0	0.291151	0.619389	0.643133	0.035999	0.64989	0.269139	0.41471	0.0803773	0.772849	0.859139	0.853191	0.277109	0.892528	0.675388	0.775169	0.450608	SMED30028658	Sxlregen_comp7410_c0_seq2	Sxlregen	2783	SMEDS2F2_0000009	0	2	.	0	A4II20	4e-28	Early growth response protein 1	AFJ24726.1	0	early growth response-4 [Schmidtea mediterranea]
SMED30018404	-0.0107313	-0.0285078	-0.177086	-0.114664	0.0854898	-0.12925	-0.225588	-0.18269	-0.0107313		0	0	0	0	0	0	0	0	0.896439	0.7297	0.0323318	0.166047	0.300164	0.11828	0.00664359	0.0273099	0.982982	0.910865	0.184616	0.577901	0.681863	0.492355	0.104554	0.27175	SMED30018404	AsxlWT_comp57987_c0_seq1	AsxlWT	1579	SMEDS2F2_0002775	3	1	.	0	.	.	.	.	.	.
SMED30033094	0.0563751	0.0867453	0.131809	0.0960814	-0.0264066	0.0395318	0.0405673	0.0763351	0.0563751		0	0	0	0	0	0	0	0	0.195542	0.0461768	0.00234088	0.0275334	0.548644	0.365039	0.354139	0.0790474	0.692927	0.273958	0.0324899	0.238276	0.845114	0.75145	0.741447	0.447711	SMED30033094	AsxlWT_comp36962_c0_seq1	AsxlWT	2116	rc_smed005657	0	1	.	0	Q96HN2	0	Putative adenosylhomocysteinase 3	CAX82771.1	0	Putative adenosylhomocysteinase 3 [Schistosoma japonicum]
SMED30008445	0.138899	0.151962	0.134731	0.0456073	-0.0974392	0.0584804	0.111324	0.0153103	0.138899		0	0	0	0	0	0	0	0	0.0960074	0.068531	0.105246	0.591199	0.262248	0.488578	0.187669	0.856099	0.567481	0.334423	0.362081	0.880464	0.645251	0.822359	0.583036	0.966577	SMED30008445	AsxlWT_comp42227_c0_seq1	AsxlWT	1303	SMEDS2F2_0000123	6	1	YES	0	O14656	2e-65	Torsin-1A	XP_002595285.1	5e-75	hypothetical protein BRAFLDRAFT_128102 [Branchiostoma floridae]
SMED30030637	0.111078	0.158232	0.123749	0.210819	-0.00101429	-0.0363168	0.0803192	0.049679	0.111078		0	0	0	0	0	0	0	0	0.111484	0.023033	0.0752014	0.002446	0.988606	0.607613	0.253915	0.477907	0.596142	0.188062	0.301283	0.0473445	0.997065	0.87816	0.65426	0.832062	SMED30030637	AsxlWT_comp68554_c0_seq1	AsxlWT	492	sm_rc_105680	0	1	.	2	.	.	.	.	.	.
SMED30005440	0.40143	0.218993	0.0107543	0.32478	0.135547	0.038481	0.219134	-0.206502	0.40143		0	0	0	0	0	0	0	0	0.118779	0.409355	0.968531	0.216289	0.619631	0.8883	0.41462	0.465226	0.604985	0.744924	0.989258	0.638029	0.878985	0.97348	0.775169	0.828925	SMED30005440	uniq_sm_rc_605431	033226_uniq	374	sm_rc_605431	0	.	.	.	.	.	.	.	.	.
SMED30007472	0.0430563	-0.0252861	0.0263831	-0.0343093	0.129932	0.0433457	0.0894267	-0.0136147	0.0430563		0	0	0	0	0	0	0	0	0.588192	0.752599	0.739631	0.67061	0.103064	0.586623	0.26257	0.864544	0.907406	0.919976	0.902839	0.910267	0.436462	0.869464	0.662734	0.968726	SMED30007472	AsxlWT_comp53036_c0_seq1	AsxlWT	1403	SMEDS2F2_0000676	3	1	.	0	Q6ZQ11	7e-10	Chondroitin sulfate synthase 1	ELU06608.1	4e-27	hypothetical protein CAPTEDRAFT_168658 [Capitella teleta]
SMED30011928	0.0913883	0.235282	0.187625	0.203997	0.049042	0.171148	0.12854	-0.0123329	0.0913883		0	0	0	0	0	0	0	0	0.309778	0.00814462	0.0349268	0.0226736	0.590905	0.055843	0.154683	0.89173	0.783942	0.100912	0.193776	0.212515	0.865847	0.355903	0.535949	0.975697	SMED30011928	AsxlWT_comp51439_c0_seq1	AsxlWT	691	sm_rc_39286	4	1	.	4	.	.	.	.	.	.
SMED30022291	-0.0915241	0.0897414	0.0801387	0.257803	0.165141	0.316807	0.327359	0.177625	-0.0915241		0	0	0	0	0	0	0	0	0.522907	0.520596	0.564534	0.0604002	0.238336	0.0194428	0.0164333	0.195592	0.887969	0.81086	0.815979	0.359875	0.622506	0.210399	0.180883	0.633223	SMED30022291	AsxlX1_comp84464_c0_seq2	AsxlX1	2156	AAA.454ESTABI.83	1	2	.	0	Q6P3X8	5e-29	PiggyBac transposable element-derived protein 2 [Homo sapiens]	BAO04164.1	5e-98	transposase [Spodoptera frugiperda]
SMED30022383	0.394148	0.357898	0.315403	0.137282	0.267758	0.259045	0.272709	0.303385	0.394148		0	0	0	0	0	0	0	0	5.53167e-09	1.21604e-07	3.10862e-06	0.0433441	7.96538e-05	0.00013168	5.78879e-05	7.30366e-06	3.45971e-06	1.3521e-05	0.000179594	0.305301	0.0055741	0.00850144	0.00417753	0.000788717	SMED30022383	AsxlWT_comp57465_c0_seq1	AsxlWT	1433	SMEDS2F2_0001807	3	1	.	0	P70191	2e-36	TNF receptor-associated factor 5 [Mus musculus]	XP_005047685.1	1e-48	TNF receptor-associated factor 3 isoform X5 [Ficedula albicollis]
SMED30000963	0.101143	0.16685	0.172211	0.0659648	0.0211463	0.124337	0.127075	0.0361402	0.101143		0	0	0	0	0	0	0	0	0.206572	0.0359941	0.0295143	0.415134	0.796219	0.120428	0.11486	0.653234	0.704033	0.238908	0.174707	0.799048	0.94253	0.495235	0.469463	0.90549	SMED30000963	AsxlX1_comp73321_c1_seq2	AsxlX1	840	SMEDS2F2_0001622	1	1	.	0	Q5HZ92	4e-26	Ceramide-1-phosphate transfer protein	CCD60302.1	4e-26	glycolipid transfer protein (gltp), putative [Schistosoma mansoni]
SMED30026388	0.218226	-0.0935007	-0.207616	-0.455844	-0.0811876	0.292875	-0.0971938	-0.278579	0.218226		0	0	0	0	0	0	0	0	0.621876	0.839669	0.65665	0.353664	0.86231	0.504626	0.835347	0.555347	0.916809	0.949513	0.86103	0.761046	0.9643	0.832588	0.956298	0.871105	SMED30026388	Asxlsort_comp45508_c0_seq1	Asxlsort	422	sm_707609	1	1	.	0	Q53H47	4e-08	Histone-lysine N-methyltransferase SETMAR	XP_003704143.1	3e-11	histone-lysine N-methyltransferase SETMAR-like [Megachile rotundata]
SMED30009102	-0.202588	-0.31385	-0.196329	-0.235148	-0.315639	-0.218408	0.0819431	0.183305	-0.202588		0	0	0	0	0	0	0	0	0.555284	0.368903	0.565397	0.498767	0.372906	0.527143	0.806261	0.57214	0.902053	0.714434	0.816401	0.846862	0.739285	0.844348	0.94786	0.877431	SMED30009102	AsxlWT_comp61801_c0_seq10	AsxlWT	632	NA	NA	1	.	0	.	.	.	.	.	.
SMED30018431	-0.529038	-0.146461	-2.50418	-1.77992	0.0201811	-0.507497	-1.12228	-2.13977	-0.529038	6	0	0	-1	-1	0	0	0	-1	0.273274	0.746342	0.000182001	0.00322022	0.964018	0.293616	0.0389489	0.000691246	0.760529	0.917458	0.00495475	0.0581325	0.991293	0.696976	0.282252	0.0275956	SMED30018431	AsxlX1_comp70559_c0_seq1	AsxlX1	1737	SMEDS2F2_0002545	2	1	.	12	Q8R0M8	5e-34	Monocarboxylate transporter 5	ESO98864.1	2e-59	hypothetical protein LOTGIDRAFT_213657 [Lottia gigantea]
SMED30002966	-0.249927	0.203748	-0.000736828	-0.364309	-0.502488	0.0091424	-0.527246	-0.287255	-0.249927		0	0	0	0	0	0	0	0	0.379244	0.446159	0.997853	0.21113	0.0936399	0.973463	0.0782906	0.312268	0.825862	0.762026	0.999309	0.63378	0.416222	0.994914	0.392774	0.734915	SMED30002966	OX_Smed_1.0.15732	Oxford	540	isotig25619	1	.	.	.	.	.	.	.	.	.
SMED30022541	0.114517	0.121874	-0.165738	-0.10087	-0.231958	0.085088	-0.0867649	-0.0752876	0.114517		0	0	0	0	0	0	0	0	0.553364	0.528185	0.410496	0.61773	0.265986	0.662457	0.668622	0.704412	0.900872	0.814557	0.710084	0.891557	0.647758	0.901738	0.900785	0.924589	SMED30022541	uniq_sm_rc_113812	033226_uniq	745	sm_rc_113812	0	1	.	0	.	.	.	.	.	.
SMED30015107	-0.0419456	0.23143	0.0686458	0.344962	-0.0240217	0.123546	0.160841	0.0626429	-0.0419456		0	0	0	0	0	0	0	0	0.816146	0.18262	0.69765	0.044784	0.895386	0.484529	0.364239	0.723395	0.970761	0.531385	0.883533	0.310212	0.973709	0.820202	0.743528	0.930893	SMED30015107	AsxlX1_comp76933_c0_seq3	AsxlX1	826	SMEDS2F2_0001153	0	1	.	4	.	.	.	CCD79664.1	3e-18	putative peptide (allatostatin/somatostatin)-like receptor [Schistosoma mansoni]
SMED30035956	0.193296	0.0772178	0.132625	0.12165	0.14298	0.14632	0.127251	0.0159136	0.193296		0	0	0	0	0	0	0	0	0.019217	0.355239	0.109108	0.145285	0.0879193	0.0781897	0.128376	0.849224	0.309614	0.703425	0.369368	0.545579	0.402535	0.414723	0.49315	0.965261	SMED30035956	AsxlWT_comp50243_c0_seq1	AsxlWT	838	SMEDS2F2_0002840	5	1	.	0	.	.	.	.	.	.
SMED30010391	-1.38496	0.772942	-0.765559	-1.34422	-0.197832	-0.0864762	-0.664365	0.0340217	-1.38496		0	0	0	0	0	0	0	0	0.0933614	0.195939	0.304697	0.104689	0.777766	0.898958	0.37561	0.959239	0.562963	0.548016	0.616936	0.472806	0.93652	0.97726	0.748404	0.990222	SMED30010391	berlin_isotig17360	Berlin	390	isotig17360	0	1	.	0	.	.	.	.	.	.
SMED30016161	-0.0091859	-0.571394	-0.796575	-0.366601	-0.485316	-0.744369	-0.503093	0.0759571	-0.0091859		0	0	0	0	0	0	0	0	0.981378	0.188536	0.0755189	0.385816	0.265352	0.0973655	0.247972	0.843882	0.998297	0.539977	0.301865	0.783718	0.647706	0.455356	0.649085	0.963797	SMED30016161	Sxlembryo_comp93812_c1_seq2	Sxlembryo	1020	smed27141	7	1	.	0	.	.	.	.	.	.
SMED30023505	-0.19207	-0.344644	-1.66018	-1.59083	0.297318	0.225392	-0.117338	0.287354	-0.19207		0	0	0	0	0	0	0	0	0.750255	0.578391	0.0300348	0.0388382	0.598971	0.689709	0.846185	0.603664	0.958533	0.838377	0.176363	0.287592	0.868272	0.912576	0.959683	0.88871	SMED30023505	Sxlembryo_comp17144_c0_seq1	Sxlembryo	1336	smed020838	0	1	.	0	.	.	.	CDJ11802.1	2e-06	expressed conserved protein [Hymenolepis microstoma]
SMED30005252	-0.106121	-0.49972	-0.225909	-0.245168	-0.412014	0.229677	-0.429952	-0.132619	-0.106121		0	0	0	0	0	0	0	0	0.825131	0.330274	0.642775	0.621052	0.423414	0.614721	0.403191	0.782294	0.971723	0.684843	0.853102	0.892305	0.774548	0.882076	0.769144	0.948586	SMED30005252	Sxlembryo_comp97378_c0_seq3	Sxlembryo	515	NA	NA	1	.	0	.	.	.	XP_004213031.1	8e-34	uncharacterized protein LOC101236014, partial [Hydra vulgaris]
SMED30034342	-0.117101	-0.127986	-0.129652	-0.0271528	-0.0555701	-0.166816	0.00243461	-0.0743056	-0.117101		0	0	0	0	0	0	0	0	0.204673	0.167124	0.158736	0.767227	0.550206	0.0744109	0.97883	0.415102	0.701973	0.51212	0.451825	0.941923	0.845675	0.405719	0.994775	0.802484	SMED30034342	Sxlembryo_comp100640_c3_seq17	Sxlembryo	2368	SMEDS2F2_0000865	0	1	.	0	H3BNL1	7e-12	Uncharacterized protein C3orf84 [Homo sapiens]	XP_005103667.1	3e-16	uncharacterized protein LOC101849946 [Aplysia californica]
SMED30024479	-0.0825731	-0.297318	-0.193829	-0.0861263	-0.302318	-0.121831	-0.148828	-0.172694	-0.0825731		0	0	0	0	0	0	0	0	0.582706	0.0571855	0.203279	0.570418	0.057547	0.422729	0.334924	0.255503	0.907128	0.305858	0.511367	0.873076	0.330395	0.785891	0.72629	0.693264	SMED30024479	uniq_rc_smed27186	033226_uniq	902	rc_smed27186	0	.	.	.	.	.	.	.	.	.
SMED30002920	-0.510305	-0.0420132	-0.23805	-0.137093	-0.124852	-0.444274	-0.157912	-0.345477	-0.510305	7	-1	0	0	0	0	0	0	0	0.000957195	0.770856	0.106699	0.351877	0.399376	0.00380583	0.287203	0.0213576	0.0573572	0.926275	0.364705	0.759487	0.75721	0.0816105	0.683129	0.238444	SMED30002920	OX_Smed_1.0.09827	Oxford	1645	NA	NA	2	.	1	.	.	.	.	.	.
SMED30002939	1.35167	0.455415	0.416311	0.991448	0.113588	0.541161	0.524003	0.915023	1.35167	3	1	0	0	0	0	0	0	0	0.000857611	0.336664	0.379618	0.0226918	0.824114	0.247754	0.269284	0.0355093	0.0532902	0.687987	0.685637	0.212552	0.952518	0.656636	0.667945	0.310108	SMED30002939	berlin_CUFF.16017.1	Berlin	581	sm_rc_618002	6	.	.	.	.	.	.	.	.	.
SMED30017976	-0.192024	-0.287142	-0.395437	-0.268124	-0.232777	-0.27094	-0.35649	0.0542834	-0.192024		0	0	0	0	0	0	0	0	0.307566	0.132363	0.0400289	0.161626	0.225426	0.155624	0.067301	0.764999	0.782388	0.459491	0.210501	0.570927	0.610896	0.549283	0.366882	0.943636	SMED30017976	SxlWT_comp65864_c2_seq1	SxlWT	934	rc_smed005957	6	2	.	0	Q96MW7	1e-66	Tigger transposable element-derived protein 1 [Homo sapiens]	XP_006019753.1	1e-84	tigger transposable element-derived protein 1-like [Alligator sinensis]
SMED30031362	-0.176773	-0.714829	-0.860935	-0.63315	-0.296887	-0.387568	-0.658839	-0.525232	-0.176773	6	0	-1	-1	-1	0	0	-1	-1	0.25939	5.90226e-06	5.29308e-08	5.89704e-05	0.0585677	0.0135962	2.94437e-05	0.000840681	0.750513	0.000382704	5.68665e-06	0.00230959	0.333658	0.173128	0.00253275	0.0316267	SMED30031362	Asxlsort_comp80730_c0_seq1	Asxlsort	1929	SMEDS2F2_0003732	4	2	.	0	.	.	.	.	.	.
SMED30033207	0.136311	0.0412791	0.0746855	0.104366	0.0888334	0.151258	0.165565	0.0477145	0.136311		0	0	0	0	0	0	0	0	0.14569	0.664211	0.427226	0.271028	0.353432	0.1068	0.0793996	0.613495	0.643479	0.881377	0.722496	0.693721	0.7258	0.470843	0.395431	0.888765	SMED30033207	SxlWT_comp38955_c0_seq1	SxlWT	762	SMEDS2F2_0001311	1	1	.	0	Q32LJ2	3e-78	ADP-ribosylation factor-related protein 1	EKC34761.1	7e-89	ADP-ribosylation factor-related protein 1 [Crassostrea gigas]
SMED30014378	0.0229101	0.00455756	-0.0429472	0.0175824	-0.0140666	0.0200885	0.0449143	0.0879496	0.0229101		0	0	0	0	0	0	0	0	0.584873	0.913551	0.306431	0.675805	0.738796	0.632249	0.285249	0.0354194	0.907128	0.975281	0.618944	0.912248	0.924834	0.890417	0.681753	0.31009	SMED30014378	AsxlWT_comp61106_c2_seq3	AsxlWT	5180	SMEDS2F2_0001882	1	1	.	0	Q6GP04	0	Protein MON2 homolog [Xenopus laevis]	XP_003702851.1	0	protein MON2 homolog [Megachile rotundata]
SMED30021962	0.00896172	0.113949	0.0947836	0.0635136	0.0581161	0.109302	0.0584384	0.0599293	0.00896172		0	0	0	0	0	0	0	0	0.855754	0.0200168	0.0526439	0.197735	0.240425	0.0258334	0.236905	0.22191	0.977674	0.17441	0.248436	0.61826	0.623922	0.242282	0.638495	0.661631	SMED30021962	Sxlembryo_comp69800_c0_seq1	Sxlembryo	1365	SMEDS2F2_0001144	0	1	.	0	Q5RCE3	4e-163	Protein pelota homolog [Pongo abelii]	GAA47775.1	7e-176	protein pelota [Clonorchis sinensis]
SMED30028992	-0.0313488	-0.0281662	0.0218657	-0.0540308	-0.134503	-0.0881769	-0.044843	-0.131827	-0.0313488		0	0	0	0	0	0	0	0	0.512822	0.556623	0.64729	0.260435	0.00527736	0.0662421	0.350446	0.00604359	0.884135	0.830618	0.855596	0.681524	0.0891067	0.387217	0.738557	0.117509	SMED30028992	Sxlregen_comp1786_c0_seq1	Sxlregen	3297	SMEDS2F2_0000149	2	2	.	0	Q5GIS3	0	Guanine nucleotide-binding protein subunit beta	GAA51958.1	0	guanine nucleotide binding protein (G protein) beta 1 [Clonorchis sinensis]
SMED30007902	-0.0874917	-0.00356759	0.0278425	-0.163895	-0.0280755	-0.171293	-0.0329634	-0.0153079	-0.0874917		0	0	0	0	0	0	0	0	0.358553	0.969821	0.765542	0.091202	0.769768	0.0765769	0.73043	0.87063	0.812325	0.992749	0.913979	0.442078	0.934536	0.411181	0.9235	0.970365	SMED30007902	Sxlembryo_comp95089_c0_seq33	Sxlembryo	1995	SMEDS2F2_0000491	0	1	.	0	Q6AYJ1	1e-128	ATP-dependent DNA helicase Q1	EFX86121.1	2e-135	RecQ1-like protein [Daphnia pulex]
SMED30034478	-0.0141086	0.0450527	0.0837932	0.116009	-0.0375878	-0.228535	-0.078384	-0.232759	-0.0141086		0	0	0	0	0	0	0	0	0.858814	0.569067	0.287409	0.141995	0.63811	0.00448222	0.326988	0.00369548	0.977674	0.83607	0.600869	0.540694	0.888833	0.0907069	0.719475	0.0872185	SMED30034478	AsxlWT_comp77643_c0_seq1	AsxlWT	973	SMEDS2F2_0000224	3	1	YES	1	.	.	.	.	.	.
SMED30025632	-0.0577427	-0.0881393	0.0897763	-0.108688	0.0222802	0.0106643	-0.079855	-0.00354182	-0.0577427		0	0	0	0	0	0	0	0	0.763079	0.647344	0.630081	0.576601	0.907665	0.955309	0.681651	0.98502	0.962447	0.872161	0.847552	0.875307	0.977194	0.989967	0.906854	0.99699	SMED30025632	OX_Smed_1.0.14666	Oxford	482	NA	NA	.	.	.	.	.	.	.	.	.
SMED30032517	-0.231575	-0.320558	-0.370269	-0.181613	-0.140862	-0.0859706	-0.390458	-0.136802	-0.231575		0	0	0	0	0	0	0	0	0.165595	0.0572737	0.0282292	0.276999	0.400158	0.602594	0.0224816	0.407605	0.668321	0.306	0.169765	0.700154	0.75779	0.875543	0.212373	0.797818	SMED30032517	AsxlWT_comp60841_c0_seq1	AsxlWT	669	SMEDS2F2_0002104	0	1	.	0	.	.	.	.	.	.
SMED30035789	-0.122577	-0.11355	0.00946694	-0.018266	0.0593118	0.00773599	0.033975	-0.00525193	-0.122577		0	0	0	0	0	0	0	0	0.342953	0.379741	0.940396	0.88683	0.643054	0.951638	0.790748	0.96695	0.802942	0.723502	0.980912	0.973593	0.890449	0.989571	0.941951	0.992088	SMED30035789	AsxlWT_comp17883_c0_seq2	AsxlWT	1868	SMEDS2F2_0001589	2	1	YES	6	P25162	2e-131	Acetylcholine receptor subunit beta-like 2	XP_003395580.1	2e-136	acetylcholine receptor subunit beta-like 2-like [Bombus terrestris]
SMED30026442	0.0605556	0.0185966	0.148018	0.00852755	-0.0808717	0.0393863	-0.0176214	0.190865	0.0605556		0	0	0	0	0	0	0	0	0.600669	0.873133	0.193799	0.942019	0.498446	0.734934	0.881375	0.0922847	0.910413	0.961043	0.498633	0.986339	0.82051	0.927897	0.971065	0.477254	SMED30026442	AsxlX1_comp82545_c0_seq17	AsxlX1	3789	SMEDS2F2_0002198	0	2	.	0	.	.	.	ELU05200.1	2e-18	hypothetical protein CAPTEDRAFT_227162 [Capitella teleta]
SMED30021895	0.0116444	0.0249203	0.0850562	0.0797204	-0.0897246	0.0292592	0.0824311	-0.0122154	0.0116444		0	0	0	0	0	0	0	0	0.882578	0.75182	0.274481	0.310941	0.267576	0.710702	0.29637	0.876833	0.980644	0.919839	0.588207	0.726157	0.649772	0.919297	0.692009	0.97147	SMED30021895	AsxlX1_comp62597_c0_seq1	AsxlX1	1819	SMEDS2F2_0001894	2	2	.	1	Q9LDH0	1e-32	Beta-(1,2)-xylosyltransferase [Arabidopsis thaliana]	ELU01420.1	9e-69	hypothetical protein CAPTEDRAFT_225629 [Capitella teleta]
SMED30011367	0.169288	0.451842	0.301345	0.301139	0.109457	0.521282	0.392552	0.619459	0.169288		0	0	0	0	0	1	0	1	0.266203	0.00237419	0.0446858	0.0462293	0.478153	0.000433257	0.00902744	2.3914e-05	0.754329	0.0442706	0.226111	0.314705	0.809716	0.0201344	0.127226	0.00214947	SMED30011367	uniq_sm_630448	033226_uniq	1305	isotig11599	0	.	.	.	.	.	.	.	.	.
SMED30024972	-0.258343	-0.00732847	-0.0471692	0.0996199	-0.0857591	-0.0855753	-0.00616804	-0.260555	-0.258343		0	0	0	0	0	0	0	0	0.318188	0.97646	0.849302	0.685188	0.737474	0.734496	0.980433	0.311723	0.790123	0.994295	0.94623	0.915372	0.924587	0.927632	0.995353	0.734915	SMED30024972	uniq_sm_467081	033226_uniq	598	sm_467081	0	.	.	.	.	.	.	.	.	.
SMED30019501	-0.0124287	0.0796821	-0.065185	0.0521485	-0.0190349	0.0127663	-0.078231	0.00948583	-0.0124287		0	0	0	0	0	0	0	0	0.848018	0.216898	0.315415	0.421083	0.770769	0.843899	0.232059	0.883409	0.975417	0.572037	0.628151	0.802315	0.934617	0.962438	0.632655	0.974029	SMED30019501	AsxlWT_comp57462_c1_seq1	AsxlWT	3167	smed012064	3	1	YES	1	Q7T2Z5	5e-98	Netrin receptor UNC5C	BAJ22068.1	2e-162	uncoordinated 5 [Dugesia japonica]
SMED30003177	-0.149041	-0.218562	-0.0739405	-0.122613	-0.132671	-0.118615	-0.206508	-0.112364	-0.149041		0	0	0	0	0	0	0	0	0.00414951	3.28054e-05	0.148222	0.0188597	0.0118503	0.0223813	0.000101973	0.0290591	0.147773	0.00158847	0.435086	0.191527	0.142703	0.225624	0.00629904	0.280202	SMED30003177	Sxlembryo_comp96099_c0_seq15	Sxlembryo	2326	SMEDS2F2_0000943	0	3	.	0	Q98SP7	2e-161	Bardet-Biedl syndrome 2 protein homolog [Danio rerio]	XP_001631555.1	1e-168	predicted protein [Nematostella vectensis]
SMED30030530	0.319491	0.0863126	0.286964	0.18247	0.29134	0.619433	-0.369569	0.498943	0.319491		0	0	0	0	0	0	0	0	0.401091	0.825106	0.450646	0.639552	0.45022	0.0922787	0.379414	0.178085	0.837604	0.944862	0.739806	0.898878	0.791756	0.444885	0.7508	0.612857	SMED30030530	uniq_sm_643335	033226_uniq	305	sm_643335	0	.	.	.	.	.	.	.	.	.
SMED30033475	-0.108227	0.10002	0.0265886	-0.0290367	0.054445	0.193489	0.146346	0.0969049	-0.108227		0	0	0	0	0	0	0	0	0.443255	0.46698	0.84734	0.83651	0.697568	0.155227	0.288849	0.479118	0.853312	0.77654	0.945736	0.961312	0.909093	0.549173	0.684792	0.832993	SMED30033475	AsxlWT_comp49597_c0_seq1	AsxlWT	884	sm_rc_211262	1	2	.	2	.	.	.	GAA51598.1	2e-25	calcium-activated potassium channel subunit beta-2 [Clonorchis sinensis]
SMED30019441	0.107871	-0.711187	-0.346865	0.0471995	0.149713	-1.25998	-0.55268	0.18098	0.107871		0	0	0	0	0	-1	0	0	0.776013	0.104276	0.395035	0.902852	0.696044	0.00904947	0.20072	0.626986	0.964333	0.411447	0.697621	0.975358	0.908176	0.138592	0.598536	0.893999	SMED30019441	uniq_sm_153729	033226_uniq	406	sm_153729	0	.	.	.	.	.	.	.	.	.
SMED30031763	-1.7588	-1.37804	0.165362	-0.595935	0.025847	-0.450484	-1.02673	-2.26811	-1.7588		0	0	0	0	0	0	0	0	0.0439809	0.0981403	0.811036	0.433848	0.969792	0.545376	0.202404	0.0147002	0.43853	0.401076	0.932057	0.80913	0.993588	0.853793	0.600309	0.195509	SMED30031763	SxlWT_comp1280342_c0_seq1	SxlWT	324	smed019570	0	1	.	3	.	.	.	XP_003725980.1	3e-05	galanin receptor type 2-like [Strongylocentrotus purpuratus]
SMED30017447	-0.0225522	-0.11084	0.431488	0.0260718	-0.416732	-7.44778e-05	-0.0400543	0.080812	-0.0225522		0	0	0	0	0	0	0	0	0.929912	0.670487	0.0685963	0.919054	0.134817	0.999765	0.877907	0.747355	0.988866	0.884233	0.286974	0.980766	0.491422	0.999948	0.969885	0.939444	SMED30017447	Sxlembryo_comp91070_c0_seq3	Sxlembryo	1031	SMEDS2F2_0002971	0	1	.	1	Q99571	7e-31	P2X purinoceptor 4	GAA35338.1	8e-76	P2X purinoceptor 4 [Clonorchis sinensis]
SMED30001675	0.986431	-0.344596	0.284507	0.362458	0.940268	0.336566	0.390957	0.390454	0.986431		0	0	0	0	0	0	0	0	0.0457767	0.578421	0.607218	0.513083	0.0631465	0.543456	0.480729	0.472848	0.446413	0.838377	0.839828	0.854197	0.344817	0.852438	0.814314	0.830527	SMED30001675	uniq_smed28319	033226_uniq	678	smed28319	0	.	.	.	.	.	.	.	.	.
SMED30020213	-0.150404	-0.184445	-0.262076	-0.139531	-0.107585	-0.196429	-0.177744	-0.131269	-0.150404		0	0	0	0	0	0	0	0	0.000816619	4.22363e-05	6.36003e-09	0.00195675	0.0170485	1.32779e-05	8.39787e-05	0.00342237	0.0516363	0.00198121	8.75846e-07	0.0399074	0.175039	0.00152605	0.00557771	0.0835308	SMED30020213	AsxlWT_comp60544_c1_seq7	AsxlWT	3767	SMEDS2F2_0001688	1	1	.	0	Q9GLM4	3e-36	Tensin-1 [Bos taurus]	XP_008108614.1	1e-35	tensin-1 isoform X1 [Anolis carolinensis]
SMED30008586	-0.0232931	-0.000205464	0.0562858	0.00768915	-0.00935366	-0.11384	-0.0184792	-0.0205973	-0.0232931		0	0	0	0	0	0	0	0	0.687358	0.997167	0.330258	0.894352	0.871772	0.0495119	0.749719	0.721882	0.939626	0.999667	0.641809	0.973593	0.967183	0.336261	0.929173	0.930566	SMED30008586	AsxlX1_comp80984_c0_seq9	AsxlX1	2434	SMEDS2F2_0001186	0	1	YES	0	.	.	.	EKC33588.1	7e-145	hypothetical protein CGI_10017740 [Crassostrea gigas]
SMED30023431	-0.507827	0.00960773	0.572948	-0.32169	-0.570982	-0.341757	0.524519	0.648367	-0.507827		0	0	0	0	0	0	0	0	0.415904	0.986595	0.284029	0.599597	0.373281	0.576398	0.336331	0.22155	0.846631	0.996699	0.597536	0.885197	0.739285	0.866477	0.72713	0.661458	SMED30023431	AsxlX1_comp60854_c0_seq1	AsxlX1	392	NA	NA	1	.	0	.	.	.	.	.	.
SMED30000146	0.128456	0.0833323	0.100416	0.0693893	0.0963757	0.015373	-0.106363	0.192112	0.128456		0	0	0	0	0	0	0	0	0.296347	0.500439	0.41412	0.577095	0.439652	0.90194	0.403325	0.114779	0.776186	0.798538	0.713111	0.875618	0.78406	0.97809	0.769215	0.522355	SMED30000146	AsxlX1_comp70014_c0_seq1	AsxlX1	1892	KG_GLI-3	2	1	.	0	Q8NEA6	1e-71	Zinc finger protein GLIS3	ACZ64516.1	0	GLI-3 [Schmidtea mediterranea]
SMED30021631	0.0589179	-0.095369	-0.0977086	-0.0362492	0.12709	0.0666956	-0.0527595	-0.130245	0.0589179		0	0	0	0	0	0	0	0	0.59687	0.395687	0.383206	0.74661	0.254947	0.549664	0.638882	0.246009	0.910054	0.735036	0.687868	0.937195	0.638176	0.855786	0.888303	0.685322	SMED30021631	AsxlWT_comp50624_c0_seq3	AsxlWT	1136	SMEDS2F2_0001132	0	1	.	0	.	.	.	.	.	.
SMED30018872	0.115132	0.204667	0.133373	0.130026	0.132871	0.307431	0.157439	0.228783	0.115132		0	0	0	0	0	0	0	0	0.0861896	0.0021317	0.045879	0.0535451	0.0493221	3.35213e-06	0.0193431	0.000563754	0.549156	0.0413409	0.229709	0.338132	0.306899	0.000526881	0.197583	0.0241089	SMED30018872	AsxlWT_comp50965_c0_seq1	AsxlWT	2067	SMEDS2F2_0000637	5	1	YES	0	P82987	6e-29	ADAMTS-like protein 3	GAA47854.1	1e-125	ADAMTS-like protein 3 [Clonorchis sinensis]
SMED30010384	-0.00677961	0.0823144	0.0659981	0.040471	0.0430794	-0.044664	-0.00782836	-0.0759244	-0.00677961		0	0	0	0	0	0	0	0	0.909921	0.167983	0.268248	0.49978	0.473605	0.45745	0.896496	0.206427	0.984795	0.513807	0.581982	0.847637	0.807744	0.805567	0.974603	0.646952	SMED30010384	Sxlembryo_comp17859_c0_seq1	Sxlembryo	1215	SMEDS2F2_0001128	0	1	.	0	Q7ZWF0	2e-144	mRNA export factor	ESO92352.1	6e-152	hypothetical protein LOTGIDRAFT_216798 [Lottia gigantea]
SMED30005211	-0.136823	-0.183299	-0.140218	-0.0504116	-0.312511	-0.173118	-0.137864	-0.0330364	-0.136823		0	0	0	0	0	0	0	0	0.0831935	0.0204371	0.0756883	0.523031	8.40638e-05	0.0285687	0.0813336	0.675053	0.543537	0.176508	0.30232	0.857888	0.00577694	0.254814	0.400064	0.913027	SMED30005211	Sxlembryo_comp101842_c0_seq1	Sxlembryo	10075	AAA.454ESTABI.12	1	1	.	0	Q6ZTR5	5e-132	Uncharacterized protein CXorf22 [Homo sapiens]	EKC20057.1	0	Uncharacterized protein CXorf22 [Crassostrea gigas]
SMED30011482	0.505834	0.330835	0.366835	-0.166192	0.527823	0.347719	0.62562	0.148824	0.505834		0	0	0	0	0	0	0	0	0.120284	0.318628	0.265231	0.638134	0.107594	0.294517	0.0536695	0.658988	0.607195	0.673555	0.578713	0.898685	0.443447	0.698113	0.328819	0.907624	SMED30011482	uniq_sm_rc_546606	033226_uniq	500	sm_rc_546606	0	.	.	.	.	.	.	.	.	.
SMED30017993	-0.302494	-0.842316	-0.492789	-0.597641	-0.371371	-1.72426	-0.388705	-1.11716	-0.302494		0	0	0	0	0	0	0	0	0.609912	0.195356	0.41803	0.342304	0.543576	0.022463	0.524643	0.0983642	0.913374	0.547639	0.715842	0.753065	0.842981	0.225793	0.833925	0.491593	SMED30017993	berlin_CUFF.221939.1	Berlin	571	NA	NA	.	.	.	.	.	.	.	.	.
SMED30004696	0.000922154	-0.036958	-0.01621	0.00841336	-0.122209	-0.0120982	-0.0495943	-0.00453764	0.000922154		0	0	0	0	0	0	0	0	0.98738	0.527785	0.780736	0.885697	0.0398391	0.836079	0.400133	0.937885	0.998873	0.814534	0.91942	0.973593	0.275642	0.960188	0.766586	0.98607	SMED30004696	AsxlWT_comp61323_c1_seq43	AsxlWT	2622	SMEDS2F2_0000125	2	2	.	0	.	.	.	GAA51527.1	2e-60	hypothetical protein CLF_106339 [Clonorchis sinensis]
SMED30003880	0.0792941	0.23663	0.17689	0.319168	-0.0307297	0.191428	0.159429	0.154517	0.0792941		0	0	0	0	0	0	0	0	0.23074	0.000329232	0.00728757	1.25088e-06	0.644648	0.00372237	0.0159697	0.0191835	0.725918	0.0104151	0.0703699	8.47692e-05	0.890969	0.08059	0.178094	0.223914	SMED30003880	AsxlWT_comp51395_c0_seq1	AsxlWT	1603	SMEDS2F2_0002339	3	1	.	8	P43005	2e-104	Excitatory amino acid transporter 3	GAA42453.2	1e-103	excitatory amino acid transporter [Clonorchis sinensis]
SMED30033742	0.0134417	0.10195	0.0642365	-0.00234249	-0.0065268	0.0539624	0.0464842	-0.062489	0.0134417		0	0	0	0	0	0	0	0	0.789171	0.0407661	0.19708	0.963135	0.89822	0.282085	0.35778	0.216525	0.966408	0.256516	0.503191	0.991752	0.975032	0.687433	0.743368	0.655999	SMED30033742	AsxlWT_comp42237_c0_seq1	AsxlWT	1364	sm_rc_221807	7	1	.	0	.	.	.	.	.	.
SMED30011007	-0.229501	0.0344681	-0.43488	-0.229801	0.0235762	0.442628	0.0864837	-0.231799	-0.229501		0	0	0	0	0	0	0	0	0.362159	0.886546	0.09308	0.365704	0.923656	0.0512402	0.721457	0.355433	0.814556	0.964626	0.338678	0.770982	0.981268	0.341992	0.920063	0.768791	SMED30011007	Asxlsort_comp68936_c0_seq1	Asxlsort	971	rc_smed012496	3	1	.	0	.	.	.	XP_004209177.1	1e-67	uncharacterized protein LOC101241532 [Hydra vulgaris]
SMED30024762	-0.233796	-0.245232	-0.196002	0.00468506	-0.294237	-0.334602	-0.241742	-0.331264	-0.233796		0	0	0	0	0	0	0	0	0.0591085	0.0482899	0.110313	0.969114	0.0201271	0.00788317	0.0538281	0.00804607	0.491641	0.280898	0.37185	0.992863	0.191517	0.127718	0.329387	0.139948	SMED30024762	Asxlregen_comp67706_c7_seq5	Asxlregen	780	isotig17717	1	1	.	1	.	.	.	CCD77599.1	4e-06	putative sno and ski oncogene family [Schistosoma mansoni]
SMED30005776	0.115599	0.0368615	-0.078659	-0.0401466	-0.126939	-0.0427439	-0.0541834	-0.099936	0.115599		0	0	0	0	0	0	0	0	0.362647	0.774762	0.546236	0.759931	0.345003	0.74383	0.682245	0.445163	0.814592	0.927246	0.802003	0.940694	0.72011	0.93037	0.906854	0.820118	SMED30005776	Sxlembryo_comp64874_c0_seq2	Sxlembryo	682	SMEDS2F2_0002566	0	1	.	0	.	.	.	.	.	.
SMED30007706	-0.530546	-0.522534	-0.0953558	-0.120521	-0.437805	-0.509216	-3.28613	-0.195498	-0.530546		0	0	0	0	0	0	-1	0	0.330213	0.337708	0.849584	0.814167	0.423261	0.350395	0.000167194	0.702455	0.796415	0.687987	0.94623	0.953544	0.774548	0.741227	0.00883682	0.923772	SMED30007706	Asxlsort_comp63089_c0_seq1	Asxlsort	813	NA	NA	1	.	0	E1BMP7	2e-42	DNA replication ATP-dependent helicase/nuclease DNA2	XP_007423220.1	6e-43	DNA replication ATP-dependent helicase/nuclease DNA2 [Python bivittatus]
SMED30030755	0.0324944	-0.112958	-0.137363	-0.117098	0.116602	-0.00934765	-0.101515	-0.0885629	0.0324944		0	0	0	0	0	0	0	0	0.594415	0.0657687	0.0251469	0.0570035	0.0563924	0.878548	0.0989886	0.148269	0.9091	0.326786	0.158026	0.348321	0.327275	0.970691	0.440342	0.571542	SMED30030755	Sxlembryo_comp96950_c1_seq4	Sxlembryo	1624	SMEDS2F2_0001676	0	1	YES	0	Q8CH02	1e-64	SURP and G-patch domain-containing protein 1	CDJ09610.1	2e-90	splicing factor 4 [Hymenolepis microstoma]
SMED30035905	-0.0605287	-0.121325	-0.071066	-0.054674	-0.129566	-0.0625533	-0.122025	-0.0540624	-0.0605287		0	0	0	0	0	0	0	0	0.264746	0.0262453	0.189626	0.315806	0.0186664	0.24999	0.0262607	0.318174	0.753217	0.202913	0.494077	0.731278	0.183877	0.659197	0.229884	0.739809	SMED30035905	AsxlWT_comp47614_c0_seq2	AsxlWT	1780	SMEDS2F2_0001595	5	1	.	0	Q6NZT2	5e-08	Cerebellar degeneration-related protein 2-like	XP_005092663.1	9e-11	cerebellar degeneration-related protein 2-like isoform X1 [Aplysia californica]
SMED30017043	0.0307198	-0.230755	-0.0512748	-0.129141	-0.235723	-0.0856201	0.00055591	-0.127934	0.0307198		0	0	0	0	0	0	0	0	0.89368	0.331691	0.824429	0.584251	0.327262	0.714046	0.998146	0.583482	0.982127	0.685617	0.937824	0.877883	0.708498	0.920181	0.999331	0.881997	SMED30017043	uniq_sm_52272	033226_uniq	813	sm_52272	0	.	.	.	.	.	.	XP_008333358.1	3e-05	LOW QUALITY PROTEIN: general transcription factor II-I repeat domain-containing protein 2-like [Cynoglossus semilaevis]
SMED30011401	0.00160384	-0.0865399	0.0528499	0.0421605	-0.572576	-0.161188	-0.141583	-0.377336	0.00160384	2	0	0	0	0	-1	0	0	0	0.992884	0.632929	0.766267	0.814255	0.00309918	0.37783	0.44065	0.0426093	0.998976	0.865453	0.913985	0.953544	0.0641797	0.759064	0.79382	0.33698	SMED30011401	OX_Smed_1.0.15283	Oxford	758	smed27249	1	1	.	1	.	.	.	.	.	.
SMED30012598	0.597052	0.819338	0.010764	1.04538	1.0919	1.26047	0.275803	1.21078	0.597052		0	0	0	0	0	0	0	0	0.320556	0.157623	0.986972	0.0627992	0.0519927	0.0194158	0.668225	0.0247863	0.791157	0.497945	0.9961	0.366399	0.314663	0.210399	0.900785	0.259091	SMED30012598	Asxlsort_comp77872_c1_seq1	Asxlsort	580	NA	NA	2	.	0	.	.	.	XP_005313443.1	2e-14	uncharacterized protein LOC101943458 isoform X2 [Chrysemys picta bellii]
SMED30026012	-0.0315135	-0.0557453	-0.186574	-0.188484	-0.0792294	0.0902689	0.0821354	-0.221267	-0.0315135		0	0	0	0	0	0	0	0	0.848874	0.737109	0.266791	0.267627	0.63851	0.580586	0.618074	0.190403	0.975417	0.913808	0.580467	0.689945	0.88922	0.867923	0.880229	0.626993	SMED30026012	uniq_sm_229137	033226_uniq	984	sm_229137	0	1	.	1	.	.	.	CAN70471.1	1e-05	hypothetical protein VITISV_013478 [Vitis vinifera]
SMED30006434	-0.0535668	0.117547	-0.407805	0.0728399	0.0793939	0.311151	0.153776	0.306857	-0.0535668		0	0	0	0	0	0	0	0	0.825663	0.620184	0.110507	0.762079	0.742899	0.1779	0.519201	0.18114	0.971889	0.859505	0.37211	0.940722	0.925997	0.57694	0.832982	0.616425	SMED30006434	SRG12_28518_c0s1	SRG12	862	smed021290	0	1	.	0	.	.	.	.	.	.
SMED30020502	0.300763	0.394058	0.46021	0.434411	0.275332	-0.116697	0.543939	-0.248248	0.300763		0	0	0	0	0	0	0	0	0.304928	0.172492	0.104536	0.132674	0.358346	0.712542	0.0562181	0.439298	0.781535	0.519502	0.360984	0.52839	0.728921	0.919973	0.337197	0.81721	SMED30020502	uniq_smed013558	033226_uniq	360	SMEDS2F2_0001349	0	.	.	.	.	.	.	.	.	.
SMED30035517	-0.108041	0.0593401	-0.0246577	-0.0679657	-0.0515072	-0.0946121	0.110497	0.132398	-0.108041		0	0	0	0	0	0	0	0	0.616328	0.779836	0.907917	0.753037	0.812211	0.661141	0.603371	0.529044	0.91514	0.929038	0.969398	0.939423	0.948003	0.901247	0.872582	0.859969	SMED30035517	OX_Smed_1.0.03682	Oxford	698	NA	NA	.	.	.	.	.	.	.	.	.
SMED30029235	0.112331	0.243191	0.217065	0.299798	0.180717	0.145895	0.146751	0.18252	0.112331		0	0	0	0	0	0	0	0	0.117772	0.000703785	0.00248776	2.96985e-05	0.0119048	0.042192	0.0410929	0.011003	0.603799	0.0185861	0.0336268	0.00130157	0.143015	0.310023	0.289998	0.166493	SMED30029235	AsxlWT_comp61935_c0_seq18	AsxlWT	4624	SMEDS2F2_0002689	1	1	.	0	P31327	0	Carbamoyl-phosphate synthase [ammonia], mitochondrial	XP_789322.3	0	carbamoyl-phosphate synthase [ammonia], mitochondrial-like [Strongylocentrotus purpuratus]
SMED30017047	0.484811	0.0583959	-0.227461	0.152779	0.544423	0.281818	0.00938465	0.13019	0.484811		0	0	0	0	0	0	0	0	0.194638	0.884368	0.585918	0.701047	0.14841	0.467434	0.981778	0.741173	0.692737	0.96397	0.828888	0.921991	0.510723	0.811053	0.995576	0.937424	SMED30017047	AY068871.1	GenBank	856	NA	NA	.	.	.	.	.	.	.	.	.
SMED30027914	0.391573	-0.000898878	-0.290698	0.348919	-0.312782	-0.383767	0.0667432	0.363765	0.391573		0	0	0	0	0	0	0	0	0.441893	0.998686	0.609143	0.500141	0.592968	0.510836	0.902747	0.474839	0.852908	0.999667	0.840208	0.847637	0.866167	0.835817	0.976318	0.830527	SMED30027914	Sxlregen_comp15328_c0_seq1	Sxlregen	3488	NA	NA	3	.	0	.	.	.	XP_008205584.1	4e-35	LOW QUALITY PROTEIN: uncharacterized protein LOC100121411 [Nasonia vitripennis]
SMED30024367	0.00904484	0.0826233	0.0204066	0.107117	0.136868	0.0970736	0.183174	0.118125	0.00904484		0	0	0	0	0	0	0	0	0.866001	0.122792	0.70317	0.0455218	0.0106745	0.0697887	0.000619805	0.0271804	0.977825	0.445804	0.886522	0.31231	0.133792	0.395381	0.0219166	0.271325	SMED30024367	AsxlWT_comp48273_c0_seq1	AsxlWT	1408	SMEDS2F2_0001948	3	1	.	0	P12812	4e-68	Major egg antigen	CCD76213.1	7e-68	putative major egg antigen [Schistosoma mansoni]
SMED30019351	-0.0746092	-0.0313755	0.0444766	0.0601296	-0.116659	-0.0435013	0.0301889	0.015327	-0.0746092		0	0	0	0	0	0	0	0	0.624189	0.835793	0.764194	0.688683	0.455385	0.774859	0.84228	0.91813	0.916809	0.948917	0.913274	0.917053	0.795145	0.942167	0.9588	0.982259	SMED30019351	AsxlX1_comp81948_c1_seq22	AsxlX1	2065	SMEDS2F2_0001171	3	1	.	0	P58465	1e-72	CTD small phosphatase-like protein	GAA56681.1	3e-75	CTD small phosphatase-like protein [Clonorchis sinensis]
SMED30005429	0.0143544	-0.0160543	-0.0332791	-0.0876292	-0.0159648	-0.219544	-0.176223	-0.262437	0.0143544		0	0	0	0	0	0	0	0	0.865648	0.850126	0.695004	0.304226	0.851449	0.0102966	0.0395427	0.00216538	0.977825	0.953474	0.881856	0.720054	0.960103	0.148714	0.283253	0.0610393	SMED30005429	OX_Smed_1.0.08105	Oxford	913	sm_rc_639006	0	1	YES	0	.	.	.	.	.	.
SMED30012292	0.0967448	-0.0507692	0.00242433	-0.0372445	0.0390639	0.011786	-0.0520052	-0.153551	0.0967448		0	0	0	0	0	0	0	0	0.199759	0.507746	0.974516	0.628073	0.610533	0.87715	0.500596	0.0465583	0.696322	0.804085	0.991963	0.895363	0.87411	0.970249	0.823926	0.352096	SMED30012292	AsxlWT_comp37464_c0_seq1	AsxlWT	746	SMEDS2F2_0002072	4	1	.	0	Q9CRA7	5e-13	ATP synthase subunit s, mitochondrial	XP_003442908.1	7e-19	ATP synthase subunit s, mitochondrial-like [Oreochromis niloticus]
SMED30033494	0.0895991	0.139986	0.168133	0.234355	4.69669e-05	-0.0121419	-0.00997303	0.0035614	0.0895991		0	0	0	0	0	0	0	0	0.124152	0.0162321	0.00384776	5.66771e-05	0.999359	0.83531	0.864562	0.951326	0.612462	0.15353	0.0455561	0.0022271	0.999759	0.960188	0.966235	0.988329	SMED30033494	AsxlWT_comp35559_c0_seq2	AsxlWT	2513	SMEDS2F2_0000550	2	1	YES	0	Q9Y6L7	3e-27	Tolloid-like protein 2	GAA56304.1	4e-110	blastula protease 10, partial [Clonorchis sinensis]
SMED30018800	0.00154864	0.395915	-0.790653	-0.482526	0.166428	-0.132716	-0.350915	-0.184875	0.00154864		0	0	0	0	0	0	0	0	0.997261	0.349471	0.121886	0.32785	0.709149	0.774337	0.469426	0.689436	0.999504	0.698175	0.392654	0.742597	0.914556	0.942131	0.809297	0.918922	SMED30018800	uniq_sm_rc_118785	033226_uniq	693	sm_rc_118785	0	.	.	.	.	.	.	.	.	.
SMED30007420	0.023697	0.139733	0.116061	0.0826932	0.182193	0.136675	0.0680249	0.123588	0.023697		0	0	0	0	0	0	0	0	0.7585	0.0669115	0.127429	0.283116	0.0174443	0.0735399	0.379174	0.104724	0.960663	0.329736	0.402566	0.705055	0.177584	0.404215	0.750671	0.505046	SMED30007420	Sxlembryo_comp99628_c0_seq1	Sxlembryo	1620	SMEDS2F2_0002798	2	1	.	0	.	.	.	AFJ24770.1	0	hypothetical protein [Schmidtea mediterranea]
SMED30029736	0.200358	-0.139097	-0.0696778	0.203815	0.0145954	0.212154	0.0530728	0.213879	0.200358		0	0	0	0	0	0	0	0	0.421905	0.592561	0.7859	0.416537	0.954871	0.395896	0.836002	0.389241	0.848605	0.845137	0.921932	0.800056	0.989129	0.772066	0.956683	0.788157	SMED30029736	uniq_sm_263798	033226_uniq	592	sm_263798	0	.	.	.	.	.	.	.	.	.
SMED30032281	0.514322	0.925932	-0.0777997	0.251153	0.512049	1.00828	0.994607	0.176404	0.514322		0	0	0	0	0	0	0	0	0.336625	0.0638749	0.894799	0.656549	0.347309	0.0411732	0.0465495	0.754436	0.80039	0.322213	0.962788	0.906334	0.722021	0.30641	0.307375	0.940476	SMED30032281	Sxlembryo_comp93347_c0_seq1	Sxlembryo	877	NA	NA	3	.	0	.	.	.	NP_476526.1	2e-19	Rep [Planaria asexual strain-specific virus-like element type 1]
SMED30009937	0.0307349	-0.810153	-1.097	0.0242145	-1.10122	-0.918865	-0.627001	-0.74962	0.0307349		0	0	0	0	0	0	0	0	0.950993	0.145096	0.056211	0.962005	0.061652	0.104052	0.253175	0.171046	0.993506	0.479304	0.257387	0.991636	0.3407	0.467068	0.65353	0.604399	SMED30009937	uniq_isotig23126	033226_uniq	316	isotig23126	0	.	.	.	.	.	.	.	.	.
SMED30010176	-0.124486	-0.0165229	0.014252	0.125006	0.207739	0.0707838	0.0782156	-0.229205	-0.124486		0	0	0	0	0	0	0	0	0.443531	0.918244	0.928947	0.432763	0.191784	0.657707	0.626164	0.161599	0.853365	0.975463	0.976066	0.808423	0.571241	0.900197	0.882828	0.591342	SMED30010176	SRG12_25163_c0s1	SRG12	545	smed013506	2	1	.	1	.	.	.	.	.	.
SMED30031800	-0.0269806	0.0210485	0.0181408	0.000704173	0.0835046	0.0681257	0.0476114	-0.0487594	-0.0269806		0	0	0	0	0	0	0	0	0.692463	0.757222	0.789482	0.991772	0.221105	0.316143	0.485339	0.474886	0.941374	0.921776	0.923927	0.999429	0.60639	0.715348	0.815627	0.830527	SMED30031800	Sxlembryo_comp76788_c0_seq2	Sxlembryo	532	smed011798	2	1	YES	0	Q32PA8	3e-38	Mth938 domain-containing protein [Bos taurus]	XP_001363217.1	1e-38	mth938 domain-containing protein isoform X1 [Monodelphis domestica]
SMED30030893	0.112128	0.068999	0.128063	-0.0224089	0.18748	0.0566612	0.0476061	0.0349846	0.112128		0	0	0	0	0	0	0	0	0.183017	0.415925	0.125914	0.795433	0.0266566	0.505562	0.579476	0.679968	0.683931	0.747722	0.400227	0.948888	0.222802	0.833287	0.861253	0.915397	SMED30030893	AsxlWT_comp41345_c0_seq1	AsxlWT	1106	SMEDS2F2_0000426	1	2	.	1	O57429	2e-25	Ubiquitin carboxyl-terminal hydrolase 2	XP_004930749.1	6e-28	ubiquitin carboxyl-terminal hydrolase 17-like isoform X2 [Bombyx mori]
SMED30004043	0.110615	0.092495	0.0332018	0.0379402	-0.00623707	0.0535389	0.113002	0.129695	0.110615		0	0	0	0	0	0	0	0	0.35408	0.439933	0.781978	0.754288	0.959447	0.656822	0.348294	0.274832	0.809567	0.758077	0.920329	0.939786	0.989801	0.899687	0.737178	0.707726	SMED30004043	AsxlX1_comp83666_c2_seq30	AsxlX1	3929	SMEDS2F2_0003429	1	1	.	0	Q14008	9e-64	Cytoskeleton-associated protein 5	XP_008202004.1	6e-76	cytoskeleton-associated protein 5, partial [Nasonia vitripennis]
SMED30032554	1.18415	0.661877	0.858574	0.701695	0.682974	-0.293378	-0.239337	-0.221975	1.18415		1	0	0	0	0	0	0	0	0.00455752	0.147941	0.0506196	0.125128	0.140125	0.587227	0.658401	0.674597	0.153732	0.484342	0.242571	0.513705	0.4986	0.869464	0.897198	0.912861	SMED30032554	Asxlsort_comp74605_c0_seq1	Asxlsort	548	NA	NA	1	.	0	.	.	.	.	.	.
SMED30001876	0.0051386	0.00936266	0.00404777	0.0768328	0.0992062	0.0133194	0.0477512	0.0132075	0.0051386		0	0	0	0	0	0	0	0	0.944914	0.899894	0.956399	0.300317	0.182912	0.858129	0.522991	0.858382	0.991857	0.969908	0.986707	0.716092	0.559744	0.965736	0.833925	0.966964	SMED30001876	Asxlsort_comp72083_c0_seq1	Asxlsort	1172	SMEDS2F2_0000791	10	1	.	0	O15037	2e-29	Protein KHNYN	CAX82751.1	5e-37	putative zinc finger protein [Schistosoma japonicum]
SMED30024179	-0.325118	-1.02477	-1.42016	-0.673608	-0.798281	-0.406825	-0.200506	-0.362631	-0.325118		0	-1	-1	0	0	0	0	0	0.314654	0.0034154	0.000102024	0.0460154	0.0205051	0.213175	0.533415	0.262243	0.786247	0.0569924	0.00315435	0.314145	0.19358	0.617259	0.838844	0.697153	SMED30024179	AsxlX1_comp51947_c0_seq1	AsxlX1	1040	NA	NA	2	.	0	Q9Y2J2	4e-18	Band 4.1-like protein 3	CCD82557.1	2e-22	Band 4.1-like protein [Schistosoma mansoni]
SMED30016345	0.00602941	0.346691	0.494964	0.402098	-0.0614503	0.0511293	0.139791	0.118326	0.00602941		0	0	0	0	0	0	0	0	0.919265	4.54476e-09	4.80121e-17	1.05115e-11	0.303785	0.389785	0.018634	0.0460724	0.986936	7.57271e-07	1.89654e-14	2.35497e-09	0.685925	0.76778	0.193769	0.350399	SMED30016345	AsxlWT_comp64627_c0_seq1	AsxlWT	729	SMEDS2F2_0000973	5	1	YES	0	P01267	6e-09	Thyroglobulin	ESO99685.1	3e-25	hypothetical protein LOTGIDRAFT_238761 [Lottia gigantea]
SMED30009744	0.0353959	0.371723	0.282608	0.411785	-0.139058	0.43359	-0.313317	0.518725	0.0353959		0	0	0	0	0	0	0	0	0.930274	0.330692	0.463315	0.28139	0.743397	0.252606	0.472763	0.161039	0.988866	0.685237	0.747725	0.703757	0.926	0.66105	0.810633	0.590085	SMED30009744	uniq_sm_709877	033226_uniq	469	sm_709877	0	.	.	.	.	.	.	.	.	.
SMED30032278	0.0541758	0.0972548	0.143521	0.0384338	0.165523	-0.06424	0.073936	-0.0641462	0.0541758		0	0	0	0	0	0	0	0	0.371677	0.107964	0.0169534	0.528584	0.00635751	0.294716	0.224897	0.293726	0.821235	0.419462	0.123323	0.859981	0.0995093	0.698199	0.624801	0.722317	SMED30032278	AsxlWT_comp51667_c0_seq1	AsxlWT	1184	SMEDS2F2_0001405	0	1	.	0	Q295Y7	8e-169	Mannose-1-phosphate guanyltransferase beta	ESN98657.1	2e-170	hypothetical protein HELRODRAFT_106916 [Helobdella robusta]
SMED30025467	-0.0183257	0.0127901	0.0682041	0.0222938	-0.071623	-0.0495363	-0.0472323	-0.0144841	-0.0183257		0	0	0	0	0	0	0	0	0.676567	0.77079	0.119245	0.612011	0.10489	0.260265	0.283945	0.741461	0.935398	0.926275	0.388146	0.888882	0.440055	0.667128	0.680983	0.937593	SMED30025467	Sxlembryo_comp83532_c0_seq1	Sxlembryo	2124	SMEDS2F2_0003140	0	1	.	0	Q5XHZ0	0	Heat shock protein 75 kDa, mitochondrial	EKC29184.1	0	Heat shock protein 75 kDa, mitochondrial, partial [Crassostrea gigas]
SMED30007766	0.415912	0.362945	0.266548	0.167076	-0.0400851	-0.230766	0.244742	0.130644	0.415912		0	0	0	0	0	0	0	0	0.124184	0.183296	0.332528	0.553908	0.891309	0.438758	0.3827	0.640972	0.612462	0.532113	0.643886	0.866899	0.97323	0.794645	0.753428	0.900038	SMED30007766	OX_Smed_1.0.09091	Oxford	544	NA	NA	.	.	.	.	.	.	.	.	.
SMED30029096	-0.042667	0.0317023	-0.0246002	0.0069656	0.0670414	-0.00474942	0.0857871	0.0278935	-0.042667		0	0	0	0	0	0	0	0	0.43633	0.562548	0.65324	0.898893	0.221395	0.930926	0.117214	0.610216	0.852908	0.833206	0.858997	0.974283	0.60671	0.985268	0.474072	0.888758	SMED30029096	AsxlWT_comp57400_c0_seq1	AsxlWT	1981	SMEDS2F2_0003089	2	1	.	11	Q6DEL1	6e-37	Putative sodium-coupled neutral amino acid transporter 7	EKC30221.1	9e-42	Putative sodium-coupled neutral amino acid transporter 7 [Crassostrea gigas]
SMED30032673	0.128954	-0.0861805	0.036439	0.373574	-0.013364	0.525844	0.579084	-0.381465	0.128954		0	0	0	0	0	0	0	0	0.801572	0.870766	0.943973	0.456622	0.980465	0.2846	0.23879	0.486299	0.968638	0.960194	0.98234	0.822834	0.996157	0.68949	0.640122	0.837254	SMED30032673	uniq_sm_484488	033226_uniq	392	sm_484488	0	.	.	.	.	.	.	.	.	.
SMED30006500	-0.025917	-0.0189398	-0.160005	-0.709208	0.0720455	-0.942399	-0.495889	-0.0404305	-0.025917		0	0	0	0	0	0	0	0	0.968541	0.977207	0.806751	0.317728	0.910878	0.195901	0.474468	0.950147	0.995551	0.994295	0.930441	0.732831	0.978119	0.59805	0.811301	0.987925	SMED30006500	AsxlX1_comp51520_c0_seq2	AsxlX1	462	smed013750	0	1	.	0	.	.	.	.	.	.
SMED30031098	0.31404	0.398168	0.325821	0.25064	-0.118816	0.390955	0.240593	0.359558	0.31404		0	0	0	0	0	0	0	0	0.112488	0.0418961	0.0974529	0.213294	0.579936	0.0464076	0.234686	0.0662169	0.59662	0.260245	0.346959	0.635185	0.86134	0.32559	0.635431	0.41501	SMED30031098	uniq_sm_507287	033226_uniq	658	sm_507287	0	.	.	.	.	.	.	.	.	.
SMED30006490	-0.0933211	-0.101293	-0.134759	-0.131491	-0.0925432	-0.0666974	-0.0724265	-0.0592653	-0.0933211		0	0	0	0	0	0	0	0	0.0638737	0.0445572	0.0074986	0.00954073	0.0683675	0.185239	0.152257	0.237465	0.503317	0.269579	0.0716472	0.123725	0.357995	0.584882	0.534071	0.678935	SMED30006490	AsxlX1_comp77728_c0_seq2	AsxlX1	3213	SMEDS2F2_0001170	1	1	.	0	Q9ESQ7	2e-56	PH and SEC7 domain-containing protein 1	ESO89040.1	2e-71	hypothetical protein LOTGIDRAFT_209989 [Lottia gigantea]
SMED30006987	0.101227	0.121112	0.182723	0.164284	0.124825	0.0633998	0.133531	0.0702545	0.101227		0	0	0	0	0	0	0	0	0.192796	0.119094	0.0183768	0.0345599	0.109387	0.415424	0.0862194	0.366254	0.692737	0.439824	0.129186	0.271027	0.447056	0.784122	0.411058	0.777045	SMED30006987	AsxlWT_comp39985_c0_seq1	AsxlWT	1016	SMEDS2F2_0000412	0	1	.	2	O43772	2e-122	Mitochondrial carnitine/acylcarnitine carrier protein	XP_002413523.1	2e-131	carnitine-acylcarnitine carrier protein, putative [Ixodes scapularis]
SMED30033241	0.2086	0.37334	0.172034	0.415273	-2.2396	-0.164082	0.437194	-0.451979	0.2086		0	0	0	0	0	0	0	0	0.779774	0.608768	0.817199	0.569663	0.0366726	0.834264	0.549274	0.576816	0.96505	0.853373	0.934489	0.87288	0.263057	0.959963	0.846106	0.879551	SMED30033241	uniq_sm_rc_436541	033226_uniq	502	sm_rc_436541	0	1	.	1	.	.	.	.	.	.
SMED30003791	0.28287	0.0913164	0.0984657	0.342115	0.165725	0.372699	0.188374	0.306302	0.28287		0	0	0	0	0	0	0	0	0.0633168	0.560217	0.52687	0.0246553	0.291895	0.0135195	0.227704	0.0427892	0.502157	0.831723	0.788375	0.223686	0.673504	0.172976	0.627385	0.337329	SMED30003791	SxlWT_comp63547_c1_seq2	SxlWT	1152	SMEDS2F2_0000849	0	2	.	0	Q6ZNQ3	1e-25	Leucine-rich repeat-containing protein 69 [Homo sapiens]	XP_002739623.1	2e-35	leucine-rich repeat-containing protein 69-like [Saccoglossus kowalevskii]
SMED30011852	-0.164646	-0.169208	-0.0785926	-0.15641	-0.166258	-0.0926626	-0.14236	-0.24833	-0.164646		0	0	0	0	0	0	0	0	0.0163056	0.0136936	0.246022	0.0231598	0.0164596	0.174317	0.0389902	0.000315276	0.289523	0.13926	0.559108	0.215124	0.171553	0.572261	0.282258	0.0164894	SMED30011852	Sxlembryo_comp95939_c0_seq3	Sxlembryo	2717	SMEDS2F2_0003089	6	1	.	0	O45244	0	Probable pre-mRNA-splicing factor ATP-dependent RNA helicase mog-4	GAA55811.1	0	pre-mRNA-splicing factor ATP-dependent RNA helicase DHX16, partial [Clonorchis sinensis]
SMED30032236	0.0132328	0.0103527	0.0174128	-0.00335301	0.0257577	0.0180462	0.0155942	-0.0135994	0.0132328		0	0	0	0	0	0	0	0	0.767346	0.817072	0.696609	0.94044	0.566471	0.686815	0.728226	0.761158	0.962883	0.941403	0.882736	0.985839	0.855011	0.912038	0.92284	0.942493	SMED30032236	AsxlWT_comp36641_c0_seq1	AsxlWT	2684	SMEDS2F2_0000029	11	1	.	0	P51399	5e-44	Arachidonate 5-lipoxygenase	CDJ13706.1	0	arachidonate 12-lipoxygenase [Hymenolepis microstoma]
SMED30021455	0.209629	0.129059	-0.84285	0.0247565	0.0203831	-0.40839	0.00225316	-0.392591	0.209629		0	0	0	0	0	0	0	0	0.549212	0.716575	0.0435825	0.945895	0.955881	0.296857	0.995117	0.309836	0.898485	0.905667	0.222819	0.987143	0.989362	0.699836	0.998688	0.733911	SMED30021455	uniq_sm_rc_621520	033226_uniq	303	sm_rc_621520	0	.	.	.	.	.	.	.	.	.
SMED30006327	0.0992517	0.186894	-0.0121962	0.14816	0.271943	0.183133	0.214677	0.0995553	0.0992517		0	0	0	0	0	0	0	0	0.337333	0.0671016	0.907385	0.152251	0.00779193	0.0736612	0.0368779	0.333415	0.800622	0.330347	0.969072	0.556644	0.111152	0.404441	0.274136	0.753222	SMED30006327	AsxlX1_comp62884_c0_seq1	AsxlX1	1075	SMEDS2F2_0000988	8	1	.	1	Q7Z3D4	6e-10	LysM and putative peptidoglycan-binding domain-containing protein 3 [Homo sapiens]	XP_004703545.1	1e-08	lysM and putative peptidoglycan-binding domain-containing protein 3 [Echinops telfairi]
SMED30029705	-0.0612132	-0.100666	-0.0110962	-0.0395155	-0.204175	-0.0548832	-0.0779173	-0.00135748	-0.0612132		0	0	0	0	0	0	0	0	0.515375	0.287313	0.905299	0.675732	0.0349458	0.560447	0.412828	0.988385	0.884928	0.64547	0.967876	0.912248	0.25626	0.861095	0.774532	0.997691	SMED30029705	AsxlWT_comp60262_c0_seq1	AsxlWT	1574	SMEDS2F2_0001628	4	1	.	4	.	.	.	GAA48212.1	1e-13	hypothetical protein CLF_101321 [Clonorchis sinensis]
SMED30019706	0.0321942	0.00504162	0.0578608	-0.0945034	0.163754	0.09274	0.324051	0.159929	0.0321942		0	0	0	0	0	0	0	0	0.785747	0.966177	0.622994	0.434808	0.166247	0.431688	0.00512286	0.169944	0.965794	0.991644	0.844938	0.809788	0.53706	0.791094	0.0881338	0.602687	SMED30019706	AsxlWT_comp52155_c0_seq2	AsxlWT	817	SMEDS2F2_0000792	1	1	.	0	Q9CQD1	3e-67	Ras-related protein Rab-5A [Mus musculus]	AFJ24874.1	8e-82	RAB like-1 [Schmidtea mediterranea]
SMED30015167	-0.147846	-0.139287	0.225922	0.140509	0.210631	0.0532309	0.174344	0.188629	-0.147846		0	0	0	0	0	0	0	0	0.206607	0.234074	0.0504851	0.226258	0.0696231	0.647214	0.133176	0.103099	0.704033	0.590764	0.242265	0.648812	0.359534	0.895871	0.501568	0.500833	SMED30015167	AsxlX1_comp68359_c0_seq1	AsxlX1	1439	SMEDS2F2_0000921	3	1	.	0	Q5RCR5	3e-62	Sulfatase-modifying factor 2	ESN91641.1	3e-63	hypothetical protein HELRODRAFT_189751 [Helobdella robusta]
SMED30023211	-0.100707	-0.150746	-0.673611	0.300114	0.0368672	0.16229	0.106059	0.244706	-0.100707		0	0	0	0	0	0	0	0	0.852024	0.781225	0.237218	0.5654	0.944522	0.757794	0.841979	0.637122	0.976469	0.929796	0.550731	0.871646	0.986862	0.935874	0.958772	0.898405	SMED30023211	uniq_sm_581779	033226_uniq	321	sm_581779	0	1	.	0	.	.	.	.	.	.
SMED30027524	-0.00630627	-0.0595279	0.0393521	-0.0965962	-0.0208097	-0.149507	-0.0265621	-0.140016	-0.00630627		0	0	0	0	0	0	0	0	0.946114	0.524707	0.67219	0.303653	0.824492	0.111684	0.776828	0.135371	0.991943	0.812866	0.868659	0.719468	0.952518	0.480069	0.937887	0.554123	SMED30027524	AsxlWT_comp61691_c0_seq2	AsxlWT	1655	SMEDS2F2_0000197	4	1	.	3	Q29496	4e-104	Cytochrome P450 3A24	XP_005956273.1	5e-105	cytochrome P450 3A24-like [Pantholops hodgsonii]
SMED30008311	0.151253	0.176244	0.121272	0.0694374	0.243401	0.153675	0.156337	0.25379	0.151253		0	0	0	0	0	0	0	0	0.0335313	0.0132194	0.0882966	0.331765	0.000633542	0.030925	0.0284525	0.000342994	0.392606	0.136848	0.328837	0.746061	0.023054	0.264276	0.240003	0.0173351	SMED30008311	AsxlWT_comp59685_c0_seq1	AsxlWT	2526	SMEDS2F2_0002037	7	1	.	0	.	.	.	.	.	.
SMED30001467	-0.342807	-0.442206	-0.535818	-0.151606	-0.136902	-0.241653	-0.0527157	0.0189241	-0.342807		0	0	-1	0	0	0	0	0	0.00801859	0.000749458	5.00222e-05	0.232607	0.283461	0.0589416	0.675127	0.87765	0.203004	0.0194801	0.00180495	0.654054	0.665452	0.36582	0.903852	0.971746	SMED30001467	AsxlWT_comp61639_c0_seq2	AsxlWT	1310	SMEDS2F2_0002810	3	1	.	0	Q9D5V2	2e-07	Kelch-like protein 10 [Mus musculus]	ELU09172.1	5e-11	hypothetical protein CAPTEDRAFT_224383 [Capitella teleta]
SMED30008926	-0.0412822	0.158161	0.118287	0.223426	0.198551	0.270573	0.21937	0.197392	-0.0412822		0	0	0	0	0	0	0	0	0.559123	0.0229103	0.0888105	0.00129149	0.00449522	8.71239e-05	0.00161573	0.0042833	0.903121	0.187613	0.329772	0.0292617	0.0807606	0.00631775	0.0431546	0.0953448	SMED30008926	AsxlWT_comp41806_c0_seq1	AsxlWT	744	smed005390	0	1	.	0	Q96LR7	8e-19	Uncharacterized protein C2orf50 [Homo sapiens]	XP_005104080.1	6e-26	uncharacterized protein C2orf50-like isoform X7 [Aplysia californica]
SMED30011390	0.0336814	0.125457	0.158791	0.0228905	-0.241987	-0.0392695	0.00644439	-0.0430791	0.0336814		0	0	0	0	0	0	0	0	0.646104	0.0838751	0.0272045	0.756948	0.00172863	0.597056	0.930995	0.559734	0.924029	0.371341	0.166132	0.940369	0.0446218	0.872719	0.981941	0.872696	SMED30011390	AsxlX1_comp72030_c0_seq1	AsxlX1	750	SMEDS2F2_0003519	10	1	.	0	Q9BW27	2e-23	Nuclear pore complex protein Nup85	XP_002748772.1	3e-23	nuclear pore complex protein Nup85 [Callithrix jacchus]
SMED30033150	-0.895361	-0.603933	-0.760403	-0.54419	-0.517782	-0.297863	-0.898093	-0.544157	-0.895361	6	-1	-1	-1	-1	0	0	-1	-1	3.45341e-05	0.00355366	0.000306965	0.00852405	0.0126132	0.133387	4.21742e-05	0.00771371	0.00548543	0.0585535	0.00736669	0.114139	0.148489	0.515037	0.00331443	0.1363	SMED30033150	Sxlregen_comp65786_c0_seq1	Sxlregen	1888	sm_690729	2	1	.	0	.	.	.	.	.	.
SMED30008145	-0.189769	-0.147326	-0.338588	-0.440952	0.24817	-0.329671	-0.727559	-0.100025	-0.189769		0	0	0	0	0	0	0	0	0.573216	0.660202	0.323334	0.211443	0.439105	0.339773	0.049759	0.762592	0.906265	0.879925	0.634996	0.634011	0.783721	0.733413	0.317065	0.943067	SMED30008145	uniq_smed28783	033226_uniq	535	smed28783	0	.	.	.	.	.	.	.	.	.
SMED30028443	-0.211609	-0.194829	-0.0301052	-0.41212	-0.0248604	-0.731392	-0.449377	-0.426358	-0.211609		0	0	0	0	0	-1	0	0	0.416988	0.454899	0.905638	0.126006	0.92331	0.00899724	0.0982238	0.110037	0.846713	0.767537	0.968101	0.515372	0.981268	0.138344	0.439526	0.514169	SMED30028443	OX_Smed_1.0.12977	Oxford	624	NA	NA	.	.	.	.	.	.	.	.	.
SMED30005839	-0.0111566	-0.0834805	-0.25711	-0.628542	-0.0193655	0.127322	0.154824	0.147737	-0.0111566		0	0	0	0	0	0	0	0	0.961103	0.718401	0.275606	0.0127346	0.933606	0.572067	0.493888	0.50826	0.994946	0.906555	0.589822	0.149381	0.984042	0.864721	0.820351	0.84873	SMED30005839	berlin_CUFF.167761.2	Berlin	881	NA	NA	.	.	.	.	.	.	.	.	.
SMED30016035	-0.818027	-0.814847	-0.243583	-0.331233	-0.0504777	-0.464323	-0.409831	-0.0169769	-0.818027		0	0	0	0	0	0	0	0	0.135727	0.137417	0.627909	0.52079	0.91962	0.374416	0.433686	0.972236	0.632977	0.468262	0.846678	0.85669	0.980081	0.75791	0.788198	0.993592	SMED30016035	uniq_sm_rc_504903	033226_uniq	423	sm_rc_504903	0	.	.	.	.	.	.	.	.	.
SMED30033768	-0.0699668	-0.0406846	0.14489	0.176511	-0.00813148	0.115898	0.196869	0.220337	-0.0699668		0	0	0	0	0	0	0	0	0.525653	0.711338	0.174254	0.100293	0.941555	0.28248	0.0670582	0.0369948	0.888082	0.902581	0.475033	0.462501	0.986497	0.687549	0.366269	0.314945	SMED30033768	uniq_smed26545	033226_uniq	628	smed26545	0	1	YES	0	.	.	.	.	.	.
SMED30019739	0.612994	0.61459	0.250746	0.870858	0.219742	0.995812	0.688257	-0.076571	0.612994		0	0	0	0	0	0	0	0	0.193579	0.192371	0.612107	0.0567809	0.664835	0.0261903	0.144485	0.882895	0.692737	0.544862	0.841107	0.347828	0.899909	0.244104	0.521594	0.973819	SMED30019739	OX_Smed_1.0.10773	Oxford	594	smed27969	1	.	.	.	.	.	.	.	.	.
SMED30016607	0.0862798	0.105096	0.191607	0.225608	0.0779991	0.27111	0.161049	0.1912	0.0862798		0	0	0	0	0	0	0	0	0.513515	0.425592	0.139583	0.0841002	0.560998	0.0359725	0.223083	0.141068	0.884434	0.753335	0.421698	0.426801	0.852775	0.285999	0.623458	0.561174	SMED30016607	AsxlX1_comp78559_c0_seq5	AsxlX1	804	SMEDS2F2_0000291	0	1	.	0	.	.	.	.	.	.
SMED30031352	-0.135111	-0.169532	-0.200324	-0.141003	-0.180034	-0.116719	-0.175415	-0.103181	-0.135111		0	0	0	0	0	0	0	0	0.00162126	7.9455e-05	3.07917e-06	0.00104368	3.11096e-05	0.00647617	4.78259e-05	0.0157876	0.0815274	0.00337442	0.0001788	0.0248078	0.00285609	0.114673	0.00365146	0.203155	SMED30031352	AsxlWT_comp59375_c0_seq1	AsxlWT	3576	smed016822	8	1	.	0	.	.	.	.	.	.
SMED30003997	0.00172022	0.0626727	0.120268	0.0267952	-0.0176012	0.0640744	0.067986	0.0141971	0.00172022		0	0	0	0	0	0	0	0	0.977464	0.303162	0.0479816	0.660026	0.772857	0.292521	0.264303	0.815604	0.997643	0.661572	0.235524	0.907058	0.934625	0.696248	0.663996	0.957428	SMED30003997	Asxlregen_comp58196_c0_seq1	Asxlregen	669	NA	NA	1	.	0	Q04832	1e-18	DNA-binding protein HEXBP	EPB84768.1	3e-17	hypothetical protein HMPREF1544_08490 [Mucor circinelloides f. circinelloides 1006PhL]
SMED30022887	-0.291092	-0.261032	-0.0927828	-0.0557792	-0.529264	-0.352941	-0.520983	-0.588738	-0.291092		0	0	0	0	0	0	0	0	0.25566	0.307209	0.710079	0.824306	0.0474534	0.172405	0.0501908	0.0260416	0.748305	0.664342	0.889574	0.956719	0.301845	0.570063	0.317886	0.265465	SMED30022887	uniq_sm_rc_673169	033226_uniq	577	sm_rc_673169	0	1	.	0	.	.	.	.	.	.
SMED30034444	0.201135	0.696767	-0.924151	0.976661	0.289648	0.708585	1.22777	-0.562264	0.201135		0	0	0	0	0	0	0	0	0.785595	0.30998	0.2894	0.13927	0.69582	0.301855	0.0549473	0.495896	0.965751	0.666946	0.601721	0.537085	0.908176	0.703353	0.333474	0.842121	SMED30034444	uniq_sm_rc_682723	033226_uniq	341	sm_rc_682723	0	.	.	.	.	.	.	.	.	.
SMED30010427	0.126226	0.270089	0.270002	0.269824	0.0832743	0.217886	0.356359	0.288541	0.126226		0	0	0	0	0	0	0	0	0.424279	0.0799674	0.0779214	0.0825355	0.607407	0.162717	0.0205628	0.0588844	0.849322	0.36237	0.305993	0.423322	0.872746	0.558671	0.203869	0.394121	SMED30010427	berlin_isotig08266	Berlin	594	sm_rc_164753	0	.	.	.	.	.	.	.	.	.
SMED30020066	-0.519468	-0.583204	-0.315897	0.0104124	0.0626165	0.201071	0.0915089	0.296896	-0.519468		0	0	0	0	0	0	0	0	0.226339	0.178473	0.447113	0.979446	0.876718	0.607788	0.819407	0.440055	0.722997	0.525752	0.738204	0.9959	0.968124	0.878263	0.951976	0.817708	SMED30020066	uniq_sm_rc_468408	033226_uniq	316	sm_rc_468408	0	.	.	.	.	.	.	.	.	.
SMED30011726	0.442076	0.412685	0.426501	0.380891	0.596156	0.329157	0.243273	0.45074	0.442076	4	0	0	0	0	1	0	0	0	0.000612663	0.00145311	0.000929436	0.00355873	3.49536e-06	0.0119593	0.0676252	0.000456983	0.0432033	0.0314293	0.0166583	0.0625141	0.000527308	0.162237	0.367986	0.021237	SMED30011726	AsxlWT_comp50809_c0_seq1	AsxlWT	884	SMEDS2F2_0001992	1	1	.	0	P19363	1e-08	Extracellular globin-E1	ESO86864.1	2e-30	hypothetical protein LOTGIDRAFT_73010, partial [Lottia gigantea]
SMED30012900	0.0632859	0.0751735	0.205642	0.136615	0.112793	0.0689953	0.176004	0.0597873	0.0632859		0	0	0	0	0	0	0	0	0.367985	0.284856	0.00304039	0.051643	0.110259	0.326991	0.0120858	0.394374	0.818802	0.642837	0.038448	0.332214	0.448702	0.72218	0.15172	0.79194	SMED30012900	SxlWT_comp60871_c0_seq2	SxlWT	624	smed017744	1	1	.	0	Q5UR67	5e-32	Uncharacterized protein R617 [Acanthamoeba polyphaga mimivirus]	WP_017812971.1	6e-51	hypothetical protein [Paenibacillus sp. A9]
SMED30011604	-0.084213	-0.158159	-0.113657	-0.0682725	0.0587684	-0.0347185	0.0344198	-0.00584174	-0.084213		0	0	0	0	0	0	0	0	0.105053	0.00236779	0.0287045	0.189116	0.257894	0.50379	0.507394	0.910351	0.582687	0.0442398	0.171569	0.607474	0.640861	0.831781	0.826712	0.979563	SMED30011604	AsxlWT_comp66068_c0_seq1	AsxlWT	2395	SMEDS2F2_0000207	5	1	.	1	Q9QUJ7	0	Long-chain-fatty-acid--CoA ligase 4	CDJ24756.1	0	long chain fatty acid coenzyme A ligase 4 [Echinococcus granulosus]
SMED30021606	0.109281	0.110355	0.112366	0.0502174	-0.0557087	0.0371748	0.0291022	0.0684055	0.109281		0	0	0	0	0	0	0	0	0.14638	0.142707	0.134148	0.508498	0.469361	0.623884	0.702677	0.363813	0.644235	0.47618	0.413391	0.851865	0.804967	0.885937	0.912456	0.774669	SMED30021606	Sxlembryo_comp77666_c0_seq1	Sxlembryo	500	SMEDS2F2_0001029	0	1	.	0	Q9D0B6	3e-39	Protein PBDC1	CDJ13845.1	1e-41	protein of unknown function DUF757 [Hymenolepis microstoma]
SMED30015496	0.2471	0.394566	0.0618295	0.401332	0.0161616	0.305268	0.24991	0.181873	0.2471		0	0	0	0	0	0	0	0	0.446716	0.213185	0.852913	0.208224	0.962565	0.344247	0.447904	0.577821	0.854241	0.569181	0.947154	0.630745	0.99102	0.737663	0.797635	0.88007	SMED30015496	berlin_isotig19642	Berlin	550	isotig19642	0	.	.	.	.	.	.	.	.	.
SMED30016392	-0.269568	-0.14252	-0.468186	-0.0200724	-0.700945	-0.491446	-0.0521592	-0.171345	-0.269568		0	0	0	0	-1	0	0	0	0.137499	0.424232	0.0118508	0.909357	0.000375585	0.00909571	0.769391	0.335911	0.6366	0.752955	0.0965616	0.977163	0.0165329	0.138688	0.934335	0.753599	SMED30016392	AsxlX1_comp78660_c0_seq7	AsxlX1	1085	NA	NA	2	.	0	.	.	.	.	.	.
SMED30028846	0.0279947	0.0362069	0.571052	-0.0582862	0.246076	-0.0157519	0.0393818	-0.0655759	0.0279947		0	0	0	0	0	0	0	0	0.94592	0.930101	0.126313	0.89036	0.543002	0.969911	0.924941	0.875111	0.991943	0.97983	0.40068	0.973593	0.842981	0.993916	0.981547	0.971286	SMED30028846	uniq_sm_rc_549069	033226_uniq	381	sm_rc_549069	0	.	.	.	.	.	.	.	.	.
SMED30012553	-0.192564	-0.257069	0.0299142	-0.0890466	-0.143638	-0.125225	-0.217446	-0.13011	-0.192564		0	0	0	0	0	0	0	0	0.12173	0.0403369	0.805159	0.472073	0.251072	0.31202	0.0840394	0.291128	0.608364	0.255099	0.929539	0.831891	0.634187	0.71233	0.406272	0.720022	SMED30012553	AsxlX1_comp69577_c0_seq1	AsxlX1	1557	sm_169879	0	2	.	0	.	.	.	XP_002482287.1	0.0008	protein kinase activator Bem1, putative [Talaromyces stipitatus ATCC 10500]
SMED30034136	0.903467	0.5637	0.714022	0.379765	0.377167	0.525556	0.575323	1.1922	0.903467	3	1	0	0	0	0	0	0	1	0.00421464	0.0789327	0.0247428	0.24317	0.248592	0.102412	0.0738488	0.000135646	0.148702	0.360481	0.156643	0.665458	0.632188	0.464429	0.382722	0.00862758	SMED30034136	Asxlsort_comp73190_c0_seq1	Asxlsort	1447	sm_355495	0	3	.	0	.	.	.	XP_008190173.1	5e-89	uncharacterized protein LOC103311997 [Acyrthosiphon pisum]
SMED30022344	0.439766	0.555773	0.53998	0.542326	0.297982	0.195469	0.0658964	0.120509	0.439766	2	0	1	1	1	0	0	0	0	1.66615e-05	5.42706e-08	1.26811e-07	1.12625e-07	0.00352333	0.0554879	0.518672	0.237681	0.00318596	6.56959e-06	1.18229e-05	1.06324e-05	0.0698178	0.355106	0.832762	0.679107	SMED30022344	AsxlWT_comp66129_c0_seq1	AsxlWT	1843	SMEDS2F2_0001312	0	1	.	0	Q29GR8	2e-150	Moesin/ezrin/radixin homolog 1 [Drosophila pseudoobscura pseudoobscura]	AFJ24852.1	0	FERM domain containing-1, partial [Schmidtea mediterranea]
SMED30006281	0.0946335	0.158198	0.130216	0.14634	0.00389547	0.142077	0.112325	0.0934011	0.0946335		0	0	0	0	0	0	0	0	0.0901041	0.00459576	0.0196368	0.00877969	0.944471	0.010932	0.0443577	0.0943306	0.557046	0.0693584	0.135295	0.116875	0.986843	0.153719	0.301206	0.482683	SMED30006281	AsxlWT_comp26854_c0_seq1	AsxlWT	1503	SMEDS2F2_0000980	3	1	.	0	O15488	2e-45	Glycogenin-2	XP_005502691.1	6e-61	glycogenin-2 [Columba livia]
SMED30016700	0.0278395	0.149935	0.176039	0.131005	0.121637	0.194715	0.125019	0.155004	0.0278395		0	0	0	0	0	0	0	0	0.692602	0.0324841	0.0118309	0.0623373	0.0843855	0.00542937	0.0756595	0.0268512	0.941374	0.226645	0.0964624	0.365228	0.394497	0.102191	0.386682	0.269869	SMED30016700	AsxlWT_comp70268_c0_seq1	AsxlWT	805	SMEDS2F2_0003382	2	1	.	0	P36609	3e-75	Neuronal calcium sensor 2	GAA30135.1	2e-103	neuronal calcium sensor 2 [Clonorchis sinensis]
SMED30019960	-0.143299	-0.337006	-1.2695	-0.538926	0.294725	0.221005	-0.80708	0.173578	-0.143299		0	0	0	0	0	0	0	0	0.841188	0.647388	0.131646	0.48151	0.665085	0.744839	0.314275	0.79811	0.974086	0.872161	0.40961	0.837408	0.899909	0.930537	0.709281	0.953403	SMED30019960	Sxlembryo_comp97228_c0_seq1	Sxlembryo	1710	NA	NA	2	.	0	Q9Z2Q6	3e-31	Septin-5	XP_005439651.1	2e-31	septin-4-like [Falco cherrug]
SMED30030019	0.295733	0.30385	0.345852	0.0167443	0.391454	0.0420821	0.454815	0.387648	0.295733		0	0	0	0	0	0	0	0	0.398952	0.386163	0.316997	0.964037	0.264612	0.908936	0.188515	0.258838	0.83708	0.72755	0.629112	0.991848	0.647425	0.97975	0.583986	0.694493	SMED30030019	uniq_sm_490178	033226_uniq	313	sm_490178	0	.	.	.	.	.	.	.	.	.
SMED30020468	-0.35252	-0.973038	-0.768869	-2.07922	-0.892142	-1.25038	-2.05529	-0.0748519	-0.35252		0	0	0	0	0	0	0	0	0.569639	0.157961	0.244519	0.0126391	0.197651	0.0840618	0.0139759	0.898778	0.90488	0.497966	0.557645	0.148746	0.578137	0.427685	0.165576	0.97631	SMED30020468	uniq_smed021192	033226_uniq	330	smed021192	0	1	.	0	.	.	.	.	.	.
SMED30002588	0.033922	0.0914245	0.166579	0.133575	0.0441132	-0.0016997	0.037013	-0.0222826	0.033922		0	0	0	0	0	0	0	0	0.584336	0.138921	0.00655315	0.0306531	0.480331	0.978226	0.552843	0.719997	0.907128	0.470502	0.0655119	0.254564	0.811197	0.995134	0.848208	0.929859	SMED30002588	AsxlWT_comp41708_c0_seq1	AsxlWT	1388	SMEDS2F2_0000469	1	2	.	0	Q33DR3	4e-39	Decaprenyl-diphosphate synthase subunit 2	AHY82412.1	0	decaprenyl-diphosphate synthase subunit 2 [Schmidtea mediterranea]
SMED30034471	-0.0687344	-0.146784	-0.0510273	-0.0506265	-0.104186	0.101945	0.119842	0.0412373	-0.0687344		0	0	0	0	0	0	0	0	0.70535	0.425387	0.77728	0.781776	0.574639	0.566656	0.50313	0.81698	0.94695	0.753292	0.918509	0.944763	0.859682	0.8626	0.824338	0.957874	SMED30034471	SRG12_31602_c0s1	SRG12	1226	NA	NA	2	.	1	.	.	.	XP_003378496.1	8e-07	putative integrase core domain protein [Trichinella spiralis]
SMED30025361	0.121462	0.0921284	-0.36587	-0.117161	-0.13951	0.302221	-0.133978	0.28446	0.121462		0	0	0	0	0	0	0	0	0.59411	0.68806	0.138239	0.625316	0.566058	0.17281	0.579842	0.196751	0.9091	0.891864	0.41992	0.893891	0.854939	0.570656	0.861299	0.634375	SMED30025361	uniq_sm_rc_604972	033226_uniq	426	sm_rc_604972	0	.	.	.	.	.	.	.	.	.
SMED30000095	0.0566169	0.105615	0.0969975	0.0226941	-0.086024	-0.0382242	-0.131408	0.060693	0.0566169		0	0	0	0	0	0	0	0	0.729405	0.516755	0.550131	0.890848	0.609554	0.817727	0.436505	0.709947	0.954103	0.809175	0.80477	0.973593	0.874086	0.954283	0.790463	0.926183	SMED30000095	AsxlX1_comp64393_c0_seq2	AsxlX1	1579	sm_347525	0	2	.	7	Q9Y5X5	1e-28	Neuropeptide FF receptor 2	XP_003772891.1	2e-30	neuropeptide FF receptor 2 [Sarcophilus harrisii]
SMED30009177	-0.159065	-0.0389412	-0.137368	-0.0924369	-0.11584	-0.0150425	-0.110668	-0.0155328	-0.159065		0	0	0	0	0	0	0	0	0.0375394	0.606762	0.0709694	0.226273	0.132295	0.84226	0.149222	0.836548	0.414802	0.852162	0.29256	0.648812	0.488716	0.961824	0.529483	0.96241	SMED30009177	Sxlembryo_comp100024_c0_seq7	Sxlembryo	3311	SMEDS2F2_0001863	0	1	YES	1	Q08174	2e-78	Protocadherin-1	GAA42275.1	1e-133	protocadherin-11 X-linked [Clonorchis sinensis]
SMED30031298	0.640033	-0.45267	0.951125	1.42435	0.523466	-0.440667	1.05588	0.793639	0.640033		0	0	0	0	0	0	0	0	0.404344	0.620416	0.190185	0.0363774	0.5106	0.630015	0.146349	0.286823	0.838297	0.859505	0.494339	0.278377	0.826659	0.889177	0.524725	0.717345	SMED30031298	Sxlregen_comp45352_c0_seq8	Sxlregen	430	NA	NA	1	.	0	.	.	.	.	.	.
SMED30020733	-0.00324487	0.47434	0.295548	-0.00160561	0.199438	0.109546	0.121045	-0.0107673	-0.00324487		0	0	0	0	0	0	0	0	0.986985	0.0109386	0.119502	0.993627	0.308113	0.576379	0.539638	0.956663	0.998873	0.121087	0.388266	0.999767	0.69034	0.866477	0.842012	0.99014	SMED30020733	AsxlX1_comp79552_c0_seq67	AsxlX1	1179	SMEDS2F2_0001081	0	2	.	0	.	.	.	.	.	.
SMED30016533	-0.434338	0.585278	-0.170886	-0.308027	0.142113	0.0389682	0.0338457	0.309726	-0.434338		0	0	0	0	0	0	0	0	0.173247	0.0312545	0.574077	0.328475	0.630726	0.895516	0.910121	0.272275	0.675722	0.222133	0.822368	0.743581	0.884903	0.975974	0.978783	0.706827	SMED30016533	OX_Smed_1.0.12255	Oxford	1003	NA	NA	.	.	.	.	.	.	.	.	.
SMED30013972	-0.116708	-0.138292	-0.144877	-0.0142795	-0.0726318	-0.205061	-0.185994	-0.320743	-0.116708		0	0	0	0	0	0	0	0	0.232109	0.158749	0.137729	0.882999	0.461089	0.0388002	0.0624895	0.00136143	0.727897	0.499246	0.419393	0.973075	0.79912	0.29829	0.354607	0.0443292	SMED30013972	AsxlWT_comp62545_c1_seq5	AsxlWT	1703	SMEDS2F2_0001526	0	1	.	0	O15031	3e-17	Plexin-B2	XP_002806617.1	2e-17	LOW QUALITY PROTEIN: plexin-B2 [Callithrix jacchus]
SMED30018330	-0.509646	-0.50153	-0.209295	0.365876	0.0573993	-0.397744	0.0394687	-0.447286	-0.509646		0	0	0	0	0	0	0	0	0.260567	0.268352	0.624424	0.35149	0.890829	0.372773	0.924784	0.315542	0.751383	0.626631	0.845517	0.759076	0.973194	0.757212	0.981547	0.737291	SMED30018330	Sxlembryo_comp62481_c0_seq2	Sxlembryo	407	NA	NA	1	.	0	.	.	.	CDJ11858.1	0.001	Anion:Bicarbonate TranSporter family member [Hymenolepis microstoma]
SMED30008353	0.22199	0.291977	0.301479	0.273855	-0.0727251	0.173405	0.131692	0.196957	0.22199		0	0	0	0	0	0	0	0	0.0651872	0.0143528	0.0108741	0.0228889	0.570049	0.15415	0.286557	0.101671	0.507254	0.143056	0.091417	0.213533	0.856978	0.54736	0.68265	0.498538	SMED30008353	AsxlWT_comp44677_c0_seq2	AsxlWT	1419	SMEDS2F2_0002840	1	1	.	7	Q9GJU1	6e-07	D(2) dopamine receptor	EUB63550.1	2e-36	5-hydroxytryptamine receptor 2B [Echinococcus granulosus]
SMED30001947	-0.460972	-0.56622	-0.117549	0.447046	-0.877206	-0.948039	-0.0107023	-0.995677	-0.460972		0	0	0	0	0	0	0	0	0.355335	0.265193	0.801844	0.302366	0.107373	0.0808301	0.981735	0.0661535	0.811033	0.624673	0.928381	0.718371	0.443093	0.42066	0.995576	0.41501	SMED30001947	uniq_sm_581862	033226_uniq	394	sm_581862	0	.	.	.	.	.	.	.	.	.
SMED30009351	-0.174147	-0.000901211	0.176819	0.114771	0.0855542	0.160868	0.473421	0.481237	-0.174147		0	0	0	0	0	0	0	0	0.707584	0.998407	0.684023	0.796789	0.849892	0.714639	0.260782	0.243327	0.947359	0.999667	0.875516	0.948996	0.959667	0.920181	0.66158	0.68315	SMED30009351	uniq_sm_rc_525486	033226_uniq	327	sm_rc_525486	0	.	.	.	.	.	.	.	.	.
SMED30029672	-0.0555156	-0.0380032	0.0550914	-0.00203328	-0.0253073	-0.0796408	-0.024438	-0.0089203	-0.0555156		0	0	0	0	0	0	0	0	0.44779	0.603078	0.446457	0.977823	0.730825	0.27785	0.73919	0.902435	0.854447	0.850877	0.737861	0.995295	0.921871	0.683045	0.927067	0.977227	SMED30029672	AsxlWT_comp52012_c0_seq2	AsxlWT	1748	SMEDS2F2_0000308	0	1	.	0	P31483	1e-64	Nucleolysin TIA-1 isoform p40	ADF47449.1	0	TIA1-like protein [Dugesia japonica]
SMED30014441	-0.0413914	-0.051087	-0.0862059	0.0244198	0.0381397	-0.0918986	0.0248139	0.139087	-0.0413914		0	0	0	0	0	0	0	0	0.797651	0.752197	0.593876	0.879731	0.81372	0.57213	0.87806	0.379371	0.968583	0.919841	0.832543	0.972464	0.948613	0.864721	0.969982	0.784328	SMED30014441	uniq_sm_114114	033226_uniq	395	sm_114114	0	.	.	.	.	.	.	.	.	.
SMED30017743	-0.0178347	-0.446034	-0.379301	-0.200073	-0.251911	-0.12974	-0.168783	0.0308365	-0.0178347		0	0	0	0	0	0	0	0	0.960686	0.249253	0.318844	0.594067	0.509104	0.725702	0.653011	0.931389	0.994946	0.609103	0.630838	0.881856	0.826063	0.924048	0.895379	0.984092	SMED30017743	uniq_sm_514440	033226_uniq	396	sm_514440	0	.	.	.	.	.	.	.	.	.
SMED30005367	-0.0897369	-0.108806	-0.113293	-0.0356274	-0.107089	-0.0952446	-0.0611892	-0.00702241	-0.0897369		0	0	0	0	0	0	0	0	0.151147	0.082037	0.0698669	0.5688	0.0880703	0.127969	0.328484	0.910256	0.649617	0.367862	0.290027	0.872843	0.402833	0.505489	0.721272	0.979563	SMED30005367	Sxlregen_comp8026_c0_seq1	Sxlregen	3670	SMEDS2F2_0000540	0	2	YES	4	P39087	0	Glutamate receptor ionotropic, kainate 2	GAA56161.1	0	glutamate receptor ionotropic kainate 3 [Clonorchis sinensis]
SMED30032855	-0.0227667	0.0742094	0.0508539	-0.0271085	0.158537	0.0315753	0.0118157	-0.0601153	-0.0227667		0	0	0	0	0	0	0	0	0.835151	0.494004	0.638628	0.805472	0.144716	0.772209	0.914399	0.583223	0.973216	0.794938	0.851268	0.951385	0.504582	0.941114	0.97929	0.881884	SMED30032855	AsxlWT_comp40427_c0_seq1	AsxlWT	527	SMEDS2F2_0002211	2	1	.	0	Q640V3	4e-07	Nucleolar protein 12	EUB61608.1	2e-10	Nucleolar protein [Echinococcus granulosus]
SMED30001218	-0.627071	-0.0140113	0.489984	-0.148485	-0.199686	0.000585121	-0.216724	0.489636	-0.627071		0	0	0	0	0	0	0	0	0.23742	0.976851	0.26766	0.764578	0.692125	0.999015	0.667126	0.268023	0.734196	0.994295	0.581434	0.941397	0.907741	0.999878	0.900785	0.704027	SMED30001218	berlin_CUFF.170961.1	Berlin	322	NA	NA	.	.	.	.	.	.	.	.	.
SMED30006044	0.0233463	0.0464071	-0.0754481	-0.0357945	0.0152478	0.028826	-0.0296122	0.0421156	0.0233463		0	0	0	0	0	0	0	0	0.744964	0.517119	0.297775	0.623706	0.834413	0.6887	0.685825	0.554768	0.957436	0.80945	0.610179	0.892769	0.955036	0.912576	0.907885	0.871085	SMED30006044	AsxlX1_comp83147_c1_seq7	AsxlX1	1941	SMEDS2F2_0000264	14	1	.	0	.	.	.	.	.	.
SMED30028753	-0.31637	0.252233	-0.67546	-0.268032	-0.67783	-0.154639	-0.507112	0.00146043	-0.31637		0	0	0	0	0	0	0	0	0.3541	0.415201	0.0614823	0.432876	0.0675753	0.642676	0.157225	0.996371	0.809567	0.747504	0.270493	0.808426	0.355721	0.894649	0.538811	0.998997	SMED30028753	uniq_smed29019	033226_uniq	405	smed29019	0	.	.	.	.	.	.	.	.	.
SMED30009567	0.161479	-0.362846	-0.182254	-0.287086	-0.0102357	-0.455484	-0.0497385	-0.321674	0.161479		0	0	0	0	0	0	0	0	0.244416	0.0145496	0.206262	0.0521492	0.943186	0.00248696	0.729585	0.0284986	0.740499	0.144354	0.514499	0.333912	0.986532	0.0623215	0.923234	0.278592	SMED30009567	berlin_isotig24242	Berlin	292	isotig24242	0	1	YES	0	.	.	.	.	.	.
SMED30006382	-0.191381	-0.413152	-0.150076	-0.0278385	-0.126203	-0.120889	-0.0399883	0.0303206	-0.191381		0	0	0	0	0	0	0	0	0.20122	0.00716517	0.312585	0.850947	0.401559	0.417257	0.787979	0.835684	0.698038	0.0935648	0.62544	0.964071	0.758547	0.78421	0.941008	0.962239	SMED30006382	Asxlsort_comp80034_c2_seq2	Asxlsort	1008	smed006094	18	2	.	1	.	.	.	CAJ00247.1	2e-12	TPA: reverse transcriptase [Schistosoma mansoni]
SMED30026037	0.110072	-0.0347193	0.196714	-0.301976	-0.32067	-0.301629	-0.0628269	-0.165097	0.110072		0	0	0	0	0	0	0	0	0.565888	0.858759	0.298225	0.136016	0.116359	0.135012	0.750341	0.402979	0.90488	0.956547	0.610578	0.533843	0.460177	0.518075	0.929173	0.795309	SMED30026037	berlin_CUFF.221149.1	Berlin	359	smed29059	0	.	.	.	.	.	.	.	.	.
SMED30012672	0.12995	0.101955	0.0389392	0.101045	0.181684	0.0928283	0.155921	0.105967	0.12995		0	0	0	0	0	0	0	0	0.00975122	0.0429219	0.439752	0.0452458	0.000313613	0.0655153	0.00197552	0.0351232	0.225734	0.264299	0.732247	0.311257	0.0144623	0.385503	0.0486923	0.308749	SMED30012672	AsxlWT_comp55498_c0_seq1	AsxlWT	2043	SMEDS2F2_0000937	1	1	.	2	P55772	7e-80	Ectonucleoside triphosphate diphosphohydrolase 1	XP_005097515.1	2e-83	ectonucleoside triphosphate diphosphohydrolase 2-like [Aplysia californica]
SMED30019918	0.201051	-0.338774	-0.616368	0.0869067	0.293256	-0.567241	0.114875	0.449341	0.201051		0	0	0	0	0	0	0	0	0.754286	0.630293	0.399164	0.895353	0.648768	0.439001	0.86209	0.463629	0.958706	0.864332	0.701244	0.973593	0.891887	0.794645	0.966002	0.828508	SMED30019918	Sxlregen_comp22854_c0_seq1	Sxlregen	1030	NA	NA	1	.	0	A4Z943	6e-48	Zinc finger BED domain-containing protein 5	ABF20545.1	3e-69	transposase [Tribolium castaneum]
SMED30011387	-0.0267301	-0.454951	0.548275	-0.255783	0.673549	0.22617	-0.082845	0.177026	-0.0267301		0	0	0	0	0	0	0	0	0.962317	0.455291	0.28253	0.666638	0.187248	0.677687	0.88638	0.744725	0.994946	0.767537	0.596347	0.90964	0.565396	0.907498	0.972371	0.939106	SMED30011387	SxlWT_comp63632_c0_seq1	SxlWT	2214	SMEDS2F2_0000351	0	2	.	0	.	.	.	.	.	.
SMED30026130	0.16815	0.136515	0.521741	0.445131	0.460887	0.279231	0.475674	0.459221	0.16815		0	0	1	0	0	0	0	0	0.324507	0.426543	0.00116408	0.00685983	0.00535735	0.0970461	0.00385749	0.00466527	0.793069	0.753748	0.0195987	0.0985675	0.0901025	0.455356	0.0741508	0.100183	SMED30026130	OX_Smed_1.0.05345	Oxford	445	NA	NA	.	.	.	.	.	.	.	.	.
SMED30007501	0.101029	0.223528	-0.0409212	0.124759	0.31966	0.0941783	0.267887	0.225092	0.101029		0	0	0	0	0	0	0	0	0.712783	0.415561	0.881461	0.649425	0.244554	0.731477	0.329311	0.412308	0.949194	0.747711	0.957844	0.903322	0.628092	0.926307	0.722401	0.800277	SMED30007501	Sxlembryo_comp85709_c0_seq1	Sxlembryo	874	SMEDS2F2_0002564	7	1	YES	0	P22897	6e-15	Macrophage mannose receptor 1	ADW66116.1	5e-89	lectin-like protein [Schmidtea mediterranea]
SMED30021446	0.12801	0.101449	0.0921297	0.171046	0.0914577	0.133201	0.0998599	0.100334	0.12801		0	0	0	0	0	0	0	0	0.147867	0.252767	0.29777	0.05329	0.30708	0.132636	0.263301	0.256894	0.646348	0.613296	0.610179	0.337383	0.689441	0.513676	0.6633	0.694161	SMED30021446	AsxlX1_comp84784_c0_seq13	AsxlX1	762	SMEDS2F2_0000005	7	1	.	0	Q3ZCC3	2e-08	TNF receptor-associated factor 6	AFJ24792.1	1e-34	TNF receptor associated factor-2, partial [Schmidtea mediterranea]
SMED30013267	-0.0669363	-0.0391032	-0.140804	-0.0106507	0.123517	-0.0254284	-0.0747096	-0.0662027	-0.0669363		0	0	0	0	0	0	0	0	0.26128	0.51143	0.0182958	0.858156	0.0377447	0.669345	0.211284	0.266229	0.751691	0.805593	0.128934	0.966816	0.26771	0.903542	0.609545	0.70197	SMED30013267	AsxlX1_comp80402_c0_seq2	AsxlX1	3056	SMEDS2F2_0000785	6	1	.	0	O08856	3e-11	RNA polymerase II elongation factor ELL	CDJ08330.1	2e-35	RNA polymerase II elongation factor ELL [Hymenolepis microstoma]
SMED30032816	0.0165045	0.0669857	0.247421	0.233475	0.0131555	0.0183339	0.13592	0.0209268	0.0165045		0	0	0	0	0	0	0	0	0.849762	0.440086	0.00348286	0.00640681	0.881527	0.833734	0.117252	0.809597	0.975479	0.758092	0.042415	0.0936868	0.969581	0.959703	0.474141	0.956038	SMED30032816	Sxlembryo_comp100454_c0_seq3	Sxlembryo	893	SMEDS2F2_0002328	0	1	.	4	A1L1P9	1e-16	Multidrug and toxin extrusion protein 1	XP_004686078.1	2e-19	multidrug and toxin extrusion protein 2-like [Condylura cristata]
SMED30027340	0.407188	0.521214	0.326073	0.5041	0.428892	0.148029	0.410664	0.26466	0.407188		0	1	0	1	0	0	0	0	0.0355403	0.0061202	0.0951336	0.00868327	0.0289454	0.467122	0.0364721	0.180454	0.404118	0.084068	0.343022	0.115858	0.232197	0.81092	0.272642	0.615948	SMED30027340	OX_Smed_1.0.10054	Oxford	721	NA	NA	.	.	.	.	.	.	.	.	.
SMED30005585	-0.820512	-0.660842	-1.27913	-0.378615	-0.417139	-0.366005	-0.688642	-0.129688	-0.820512		-1	-1	-1	0	0	0	-1	0	0.00088454	0.00610764	1.27274e-06	0.103081	0.0765694	0.112559	0.00497657	0.556794	0.0545272	0.0839933	8.4909e-05	0.46966	0.375357	0.481762	0.0869119	0.871479	SMED30005585	uniq_sm_rc_465041	033226_uniq	883	sm_rc_465041	0	1	.	0	.	.	.	.	.	.
SMED30010672	-0.0562738	-0.00676708	0.107716	0.0734853	0.197909	0.232351	-0.53309	0.49337	-0.0562738		0	0	0	0	0	0	0	0	0.864615	0.983527	0.735504	0.821436	0.538055	0.460853	0.143442	0.0981417	0.977825	0.995633	0.901285	0.955864	0.841468	0.807205	0.520208	0.491551	SMED30010672	Asxlsort_comp79762_c1_seq6	Asxlsort	558	NA	NA	1	.	0	.	.	.	XP_002157550.2	2e-27	uncharacterized protein LOC100214518 [Hydra vulgaris]
SMED30025487	0.263953	0.228406	0.246388	0.216348	-0.0460659	0.0952593	0.228409	0.0442367	0.263953		0	0	0	0	0	0	0	0	0.0508408	0.0926256	0.0677851	0.113267	0.74478	0.489722	0.0949377	0.748483	0.46524	0.39033	0.285426	0.489053	0.926838	0.823127	0.430597	0.939444	SMED30025487	AsxlWT_comp34584_c0_seq1	AsxlWT	511	SMEDS2F2_0003608	9	1	.	2	Q63ZZ0	8e-08	Transmembrane protein 242	ESO85401.1	3e-17	hypothetical protein LOTGIDRAFT_183804 [Lottia gigantea]
SMED30035121	-0.0830885	0.0391149	-0.00373772	0.325962	0.172106	-0.0722867	0.231934	0.11035	-0.0830885		0	0	0	0	0	0	0	0	0.682735	0.84522	0.985148	0.0934596	0.388304	0.72258	0.2397	0.576335	0.937744	0.951981	0.995829	0.448418	0.749371	0.923104	0.641341	0.879345	SMED30035121	AsxlX1_comp74091_c0_seq5	AsxlX1	1746	SMEDS2F2_0001133	0	1	.	12	Q1JPD8	1e-10	Solute carrier family 43 member 3 [Bos taurus]	CDJ16065.1	3e-27	solute carrier family 43 [Echinococcus granulosus]
SMED30006593	-0.06943	-0.029653	-0.052683	-0.0769008	-0.0293928	-0.0647886	-0.0432588	-0.00543557	-0.06943		0	0	0	0	0	0	0	0	0.145423	0.533704	0.268583	0.107558	0.538589	0.174489	0.365098	0.909037	0.643298	0.817346	0.582386	0.478937	0.841639	0.572622	0.743528	0.978951	SMED30006593	AsxlWT_comp61900_c2_seq1	AsxlWT	4933	SMEDS2F2_0000133	6	1	YES	0	Q6P5E4	0	UDP-glucose:glycoprotein glucosyltransferase 1	ELU12397.1	0	hypothetical protein CAPTEDRAFT_227323 [Capitella teleta]
SMED30031256	0.0542313	0.0702932	0.0905585	0.16491	-0.0870122	0.137172	0.121795	0.132633	0.0542313		0	0	0	0	0	0	0	0	0.402758	0.277864	0.159747	0.0105805	0.189901	0.0333486	0.0605246	0.0389152	0.838297	0.636378	0.453286	0.132894	0.568745	0.275617	0.349048	0.323085	SMED30031256	AsxlWT_comp52126_c0_seq1	AsxlWT	1576	KG_WNT11-5	2	1	.	1	P49337	7e-75	Protein Wnt-4	ABY85208.1	0	wntP-2 [Schmidtea mediterranea]
SMED30000712	0.105481	0.160378	0.300842	0.163112	0.0493444	0.0699214	0.181833	0.0644499	0.105481		0	0	0	0	0	0	0	0	0.157156	0.0306857	3.67071e-05	0.0286304	0.51541	0.35121	0.0147792	0.388155	0.657416	0.219494	0.00141825	0.244788	0.828437	0.741729	0.170648	0.787564	SMED30000712	AsxlWT_comp51707_c0_seq1	AsxlWT	923	SMEDS2F2_0001580	9	1	.	0	Q5AXW5	6e-08	Protein bcp1	XP_003489834.1	7e-07	protein BCCIP homolog [Bombus impatiens]
SMED30028023	-0.304559	-0.187148	-0.134548	-0.123039	-0.0881947	-0.0723443	-0.120715	-0.0281972	-0.304559		0	0	0	0	0	0	0	0	1.30513e-06	0.00266978	0.0294297	0.0479488	0.157028	0.241349	0.0528295	0.645346	0.000359461	0.0481111	0.174469	0.322222	0.522284	0.649183	0.326463	0.901711	SMED30028023	AsxlWT_comp54910_c0_seq1	AsxlWT	2270	SMEDS2F2_0001410	2	1	.	0	Q96M32	1e-139	Adenylate kinase 7	EKC31394.1	2e-180	Putative adenylate kinase 7 [Crassostrea gigas]
SMED30032882	0.0379292	0.0909583	0.021855	0.0589033	0.0516279	-0.0168282	-0.0684707	0.0217801	0.0379292		0	0	0	0	0	0	0	0	0.4893	0.0969096	0.690218	0.283463	0.348012	0.759523	0.214456	0.691346	0.873998	0.398505	0.878866	0.705105	0.722634	0.936333	0.612188	0.919289	SMED30032882	AsxlWT_comp53888_c0_seq3	AsxlWT	4292	smed001540	0	1	.	0	O15550	8e-158	Lysine-specific demethylase 6A	AGA95405.1	0	utx, partial [Schmidtea mediterranea]
SMED30017119	0.0155201	0.035431	0.0476119	-0.0994302	-0.290032	-0.0793878	-0.0378433	-0.176223	0.0155201		0	0	0	0	0	0	0	0	0.878693	0.72744	0.638451	0.332953	0.00541145	0.437823	0.711804	0.0859085	0.980177	0.909823	0.85114	0.74723	0.0906778	0.794336	0.916176	0.463526	SMED30017119	Sxlembryo_comp93230_c0_seq1	Sxlembryo	2730	rc_smed016239	0	1	.	0	.	.	.	XP_004210336.1	2e-12	uncharacterized protein LOC101234473, partial [Hydra vulgaris]
SMED30021481	0.0569158	0.0681666	0.0684879	0.0993003	0.0524861	-0.0124216	0.0162832	-0.0604544	0.0569158		0	0	0	0	0	0	0	0	0.345488	0.258453	0.254743	0.100147	0.38838	0.837906	0.789021	0.31971	0.80363	0.617658	0.567838	0.462396	0.749371	0.960656	0.94147	0.741007	SMED30021481	AsxlWT_comp28476_c0_seq1	AsxlWT	1087	SMEDS2F2_0003116	1	1	.	0	Q27HK4	1e-27	Metaxin-1	CDJ25642.1	1e-42	metaxin 1 [Echinococcus granulosus]
SMED30003338	-0.87721	-0.579959	-0.375788	0.392347	-0.0491439	-0.857297	-0.0663648	0.173893	-0.87721		0	0	0	0	0	0	0	0	0.253269	0.428501	0.592816	0.53189	0.94257	0.264833	0.922454	0.786475	0.746118	0.754204	0.832147	0.861407	0.986497	0.672125	0.981205	0.94952	SMED30003338	berlin_isotig12032	Berlin	443	SMEDS2F2_0000529	0	.	.	.	.	.	.	.	.	.
SMED30031558	0.09512	0.172747	0.251451	0.140367	0.172085	0.123091	0.101306	0.0753707	0.09512		0	0	0	0	0	0	0	0	0.109744	0.00359956	2.09288e-05	0.0183383	0.00387556	0.0384452	0.0893803	0.205101	0.592346	0.0589539	0.000901438	0.188125	0.0737314	0.296852	0.418675	0.645109	SMED30031558	AsxlWT_comp42531_c0_seq1	AsxlWT	1524	SMEDS2F2_0000006	3	1	.	3	A6QLM0	2e-100	Transmembrane protein 189	EKC19452.1	5e-111	hypothetical protein CGI_10008502 [Crassostrea gigas]
SMED30028307	-0.0462514	-0.0274903	-0.00507492	-0.0472324	-0.0409849	-0.16533	0.00590176	-0.0718707	-0.0462514		0	0	0	0	0	0	0	0	0.443862	0.648948	0.93282	0.435552	0.499625	0.00654946	0.922264	0.234303	0.853376	0.873322	0.977697	0.810244	0.82116	0.115024	0.981205	0.676651	SMED30028307	AsxlWT_comp61759_c0_seq1	AsxlWT	1397	SMEDS2F2_0001178	9	1	.	0	Q8IYS1	1e-91	Peptidase M20 domain-containing protein 2	ESO84063.1	4e-114	hypothetical protein LOTGIDRAFT_211007 [Lottia gigantea]
SMED30020159	-0.18357	0.117292	0.0774337	-0.235882	-0.730945	-0.447463	-0.314811	-0.578965	-0.18357		0	0	0	0	0	0	0	0	0.520619	0.665811	0.775457	0.417756	0.0226253	0.136508	0.288939	0.0572286	0.886899	0.881979	0.918236	0.800143	0.203242	0.520395	0.684845	0.38856	SMED30020159	berlin_CUFF.217832.1	Berlin	422	SMEDS2F2_0002208	0	1	.	0	Q6IP91	5e-47	Serine/threonine-protein phosphatase 4 catalytic subunit	EFX84255.1	5e-47	hypothetical protein DAPPUDRAFT_209708 [Daphnia pulex]
SMED30032854	-0.181476	-0.427345	-0.309987	-0.38771	-0.20548	-0.379023	-0.397808	-0.371179	-0.181476		0	0	0	0	0	0	0	0	0.0027577	4.60741e-12	3.81728e-07	3.59299e-10	0.000788032	7.68724e-10	1.38857e-10	1.47777e-09	0.114028	1.25744e-09	3.08061e-05	5.76819e-08	0.0266413	3.44446e-07	6.36439e-08	5.34508e-07	SMED30032854	AsxlWT_comp59478_c0_seq1	AsxlWT	1665	SMEDS2F2_0002901	0	1	.	0	Q99KQ4	1e-167	Nicotinamide phosphoribosyltransferase	XP_002601777.1	0	hypothetical protein BRAFLDRAFT_121174 [Branchiostoma floridae]
SMED30026866	0.0793773	0.11693	0.0990662	0.100031	0.0421046	0.181664	0.0891393	0.0598779	0.0793773		0	0	0	0	0	0	0	0	0.151026	0.0339851	0.0718532	0.0712139	0.452085	0.000938412	0.109007	0.278689	0.649471	0.231314	0.294411	0.391579	0.793361	0.0343311	0.458513	0.710533	SMED30026866	AsxlWT_comp56774_c1_seq1	AsxlWT	1277	SMEDS2F2_0001564	3	1	.	0	.	.	.	.	.	.
SMED30023113	-0.0864239	-0.128611	-0.0352005	-0.170791	-0.0932731	-0.110871	-0.138024	-0.0317707	-0.0864239		0	0	0	0	0	0	0	0	0.38243	0.196891	0.718929	0.0905814	0.353711	0.265725	0.17117	0.74533	0.828532	0.549031	0.893297	0.440879	0.7258	0.672797	0.560093	0.939163	SMED30023113	AsxlWT_comp50874_c0_seq3	AsxlWT	1109	isotig12464	0	1	.	0	.	.	.	AFJ24791.1	1e-09	TNF receptor associated factor-3, partial [Schmidtea mediterranea]
SMED30035429	0.36348	0.388752	0.249524	0.258239	0.245844	0.264361	0.401787	0.301604	0.36348		0	0	0	0	0	0	0	0	0.000428891	0.000158836	0.0170974	0.0148077	0.0217024	0.0120945	0.000110815	0.00366665	0.0342439	0.00585801	0.123742	0.164706	0.199264	0.162932	0.00664029	0.0868797	SMED30035429	berlin_CUFF.177868.1	Berlin	324	SMEDS2F2_0002195	0	1	.	1	.	.	.	.	.	.
SMED30014915	0.0140862	0.158422	0.155388	0.00896492	0.0974885	0.0134638	-0.0117139	0.0530042	0.0140862		0	0	0	0	0	0	0	0	0.847247	0.0282716	0.0308028	0.902954	0.183658	0.854212	0.874	0.4659	0.975417	0.210501	0.179049	0.975358	0.561171	0.965056	0.96855	0.829436	SMED30014915	AsxlX1_comp72874_c0_seq5	AsxlX1	1279	SMEDS2F2_0002421	2	1	.	0	Q5RAS0	8e-171	Short-chain specific acyl-CoA dehydrogenase, mitochondrial	XP_321112.5	5e-180	AGAP001951-PA [Anopheles gambiae str. PEST]
SMED30016561	-0.0129337	0.0514677	-0.0462482	0.0154728	0.126235	0.0997444	-0.0917034	-0.0191113	-0.0129337		0	0	0	0	0	0	0	0	0.910278	0.651925	0.68697	0.893042	0.270056	0.380256	0.432494	0.867431	0.984795	0.875342	0.876948	0.973593	0.652766	0.760584	0.787563	0.969171	SMED30016561	AsxlWT_comp51018_c0_seq1	AsxlWT	887	smed002039	1	2	.	0	Q4KMD3	1e-28	U11/U12 small nuclear ribonucleoprotein 35 kDa protein	ESN93622.1	1e-28	hypothetical protein HELRODRAFT_88458, partial [Helobdella robusta]
SMED30011745	1.22499	0.129508	0.826433	0.6177	0.851708	0.931256	0.578418	0.721575	1.22499		1	0	0	0	0	0	0	0	0.0036161	0.796281	0.0638308	0.18597	0.060591	0.0352356	0.220373	0.111728	0.133201	0.935366	0.276238	0.603657	0.338144	0.284357	0.619982	0.516548	SMED30011745	Sxlregen_comp62105_c0_seq1	Sxlregen	398	smed013183	3	1	.	1	.	.	.	.	.	.
SMED30000004	-0.00132424	-0.0630814	-0.0395993	-0.0459596	0.00578351	-0.23863	0.0430546	-0.159422	-0.00132424		0	0	0	0	0	0	0	0	0.993046	0.682277	0.795492	0.766405	0.970212	0.130844	0.778968	0.304727	0.998976	0.88939	0.926054	0.941923	0.993747	0.510139	0.938366	0.731045	SMED30000004	AsxlWT_comp33540_c0_seq1	AsxlWT	594	SMEDS2F2_0000514	0	1	.	0	Q9DGI3	2e-30	Thioredoxin	ELT90043.1	2e-38	hypothetical protein CAPTEDRAFT_206416 [Capitella teleta]
SMED30002235	0.407737	0.754663	0.281266	0.375631	0.0621489	0.529199	0.676582	-0.381911	0.407737		0	0	0	0	0	0	0	0	0.519284	0.214225	0.660605	0.558775	0.92717	0.397809	0.274958	0.584256	0.886624	0.570198	0.863388	0.869041	0.982304	0.774091	0.672907	0.881997	SMED30002235	uniq_sm_689822	033226_uniq	316	sm_689822	0	.	.	.	.	.	.	.	.	.
SMED30033469	-0.0335074	-0.0366558	0.0107914	0.0582971	0.0646825	0.114986	0.00614093	-0.0539759	-0.0335074		0	0	0	0	0	0	0	0	0.632974	0.601577	0.877405	0.405399	0.356851	0.0996669	0.930376	0.441804	0.919951	0.849984	0.956708	0.791678	0.728221	0.458622	0.981941	0.818596	SMED30033469	AsxlWT_comp42659_c0_seq1	AsxlWT	764	SMEDS2F2_0000958	0	1	.	1	Q6FWS2	4e-18	Pre-rRNA-processing protein ESF2	GAA56316.1	2e-28	ESF2/ABP1 family protein [Clonorchis sinensis]
SMED30018664	-0.069486	0.146929	0.214008	0.204514	0.16116	0.00299338	0.182994	0.158408	-0.069486		0	0	0	0	0	0	0	0	0.654089	0.335408	0.156833	0.179558	0.293633	0.984544	0.231361	0.296978	0.926551	0.68798	0.449112	0.595769	0.675142	0.995933	0.631655	0.724903	SMED30018664	uniq_sm_74126	033226_uniq	1209	sm_74126	0	.	.	.	.	.	.	.	.	.
SMED30016352	0.0543004	0.0623909	0.160257	0.0544435	-0.108575	-0.0140807	-0.0101406	0.0339795	0.0543004		0	0	0	0	0	0	0	0	0.489566	0.427372	0.0398351	0.489964	0.174507	0.858547	0.898209	0.665343	0.874122	0.754204	0.209879	0.841742	0.547924	0.965986	0.975337	0.90908	SMED30016352	AsxlWT_comp48213_c0_seq1	AsxlWT	1326	SMEDS2F2_0002185	1	1	.	9	Q8CHJ1	3e-41	Phosphatidylinositol glycan anchor biosynthesis class U protein	CAX72892.1	4e-59	CDC91 cell division cycle 91-like 1 [Schistosoma japonicum]
SMED30004870	0.075485	0.0375551	0.0659953	0.0617886	0.00356362	0.0668744	0.0909754	0.188259	0.075485		0	0	0	0	0	0	0	0	0.349239	0.64336	0.411644	0.447433	0.965512	0.408715	0.26316	0.0175423	0.805571	0.870308	0.710923	0.816971	0.99186	0.779827	0.663145	0.215218	SMED30004870	Sxlembryo_comp98702_c0_seq1	Sxlembryo	2465	SMEDS2F2_0000200	0	1	.	0	P10533	1e-113	Serine/threonine-protein kinase-transforming protein Rmil	GAA52036.1	3e-117	serine/threonine-protein kinase-transforming protein Rmil [Clonorchis sinensis]
SMED30025107	0.177724	0.2188	-0.274092	0.123237	0.134469	0.415127	-0.210381	-0.271052	0.177724		0	0	0	0	0	0	0	0	0.561539	0.472264	0.405225	0.69274	0.66854	0.159133	0.527076	0.41048	0.903568	0.780754	0.705753	0.918959	0.900456	0.553956	0.835402	0.799417	SMED30025107	uniq_sm_rc_672610	033226_uniq	426	sm_rc_672610	0	.	.	.	.	.	.	.	.	.
SMED30030350	0.0437102	-0.111215	-0.18243	-0.0746555	0.0887956	-0.0323304	-0.162699	-0.0951747	0.0437102		0	0	0	0	0	0	0	0	0.660893	0.273126	0.0731835	0.462597	0.376469	0.74827	0.114007	0.345609	0.929088	0.631912	0.296809	0.826496	0.741745	0.931566	0.468321	0.761244	SMED30030350	SxlWT_comp54747_c0_seq1	SxlWT	647	rc_smed000966	1	1	.	0	.	.	.	.	.	.
SMED30019384	0.546943	0.840106	1.43301	1.12337	1.16637	0.203969	1.358	1.25546	0.546943		0	0	0	0	0	0	0	0	0.578737	0.375059	0.0999276	0.221217	0.204466	0.844127	0.128467	0.159316	0.907128	0.719834	0.351609	0.643648	0.586777	0.962483	0.493313	0.587932	SMED30019384	Sxlembryo_comp71801_c0_seq1	Sxlembryo	378	NA	NA	1	.	0	.	.	.	.	.	.
SMED30005177	-0.203876	-0.581735	-0.509641	-0.317471	-0.16692	-0.192744	-0.473772	-0.283813	-0.203876		0	-1	-1	0	0	0	0	0	0.157834	6.0735e-05	0.000434924	0.0280855	0.24766	0.181795	0.00107672	0.0494326	0.657904	0.00268531	0.00947522	0.241496	0.631512	0.581655	0.0319725	0.361955	SMED30005177	SxlWT_comp62150_c0_seq4	SxlWT	3915	AAA.454ESTABI.63	1	1	.	0	.	.	.	.	.	.
SMED30003323	-0.130951	-0.282634	-0.21352	-0.152942	-0.182934	-0.239859	-0.186426	-0.0403363	-0.130951		0	0	0	0	0	0	0	0	0.0726201	0.000111165	0.0034496	0.0362305	0.0123297	0.00103164	0.0107394	0.579779	0.525243	0.00440276	0.0421491	0.278036	0.146597	0.0368261	0.14103	0.880714	SMED30003323	AsxlWT_comp60808_c0_seq3	AsxlWT	4221	JCR.Par1lF.f	0	1	.	0	Q03141	4e-157	MAP/microtubule affinity-regulating kinase 3	XP_007986135.1	4e-160	MAP/microtubule affinity-regulating kinase 3 isoform X2 [Chlorocebus sabaeus]
SMED30026030	-0.107541	-0.191139	-0.657642	0.513432	0.503222	0.361793	0.210971	0.250532	-0.107541		0	0	0	0	0	0	0	0	0.826038	0.700251	0.215646	0.251185	0.26551	0.427382	0.65438	0.586456	0.971947	0.896931	0.524927	0.673292	0.647706	0.78825	0.89624	0.882709	SMED30026030	SxlWT_comp50603_c1_seq2	SxlWT	390	SMEDS2F2_0001175	0	1	.	0	Q12933	3e-06	TNF receptor-associated factor 2	AEL04302.1	1e-07	TNF receptor-associated factor 6, partial [Trapelus agilis]
SMED30025876	0.0148947	-0.0289157	-0.0391868	-0.0534834	0.0379953	-0.0377072	-0.0472013	0.0102085	0.0148947		0	0	0	0	0	0	0	0	0.811128	0.644152	0.530301	0.395725	0.545241	0.547665	0.454181	0.86972	0.970761	0.870812	0.790711	0.785151	0.84336	0.854723	0.802292	0.970303	SMED30025876	AsxlWT_comp55275_c0_seq1	AsxlWT	1378	JCR.ATG6	0	1	.	0	Q6GP52	1e-74	Beclin-1 [Xenopus laevis]	EKC28450.1	2e-76	Beclin-1 [Crassostrea gigas]
SMED30031895	0.195514	0.409866	0.552835	1.1864	-0.614165	1.04021	0.0262748	-0.0715537	0.195514		0	0	0	0	0	0	0	0	0.798296	0.579663	0.441267	0.0703356	0.48932	0.119833	0.973732	0.928241	0.968583	0.838673	0.733332	0.389457	0.81647	0.494301	0.993631	0.983554	SMED30031895	SxlWT_comp65810_c0_seq23	SxlWT	762	smed017067	17	1	YES	0	.	.	.	.	.	.
SMED30033914	-0.427246	-0.381386	-0.346525	-0.455223	-0.435426	-0.51714	-0.722725	-0.607457	-0.427246		0	0	0	0	0	0	0	0	0.183355	0.233153	0.275674	0.160303	0.179611	0.111241	0.0302965	0.0627054	0.683931	0.589519	0.589838	0.568413	0.554717	0.479764	0.247518	0.404747	SMED30033914	dd_smedV4_24602_0_1	Dresden	1213	rc_smed010543	2	1	.	0	.	.	.	AAP69990.1	2e-11	ORF2 [Girardia tigrina]
SMED30028111	-0.58238	-0.000896842	-0.761293	-0.337161	-0.487495	-0.788901	-0.30816	0.00913344	-0.58238		0	0	0	0	0	0	0	0	0.135925	0.997975	0.057228	0.372202	0.213228	0.0523883	0.415059	0.979208	0.633386	0.999667	0.259876	0.774725	0.597657	0.34501	0.775437	0.996112	SMED30028111	uniq_sm_rc_494242	033226_uniq	358	sm_rc_494242	0	.	.	.	.	.	.	.	.	.
SMED30010520	-0.109295	-0.0376441	0.0527138	-0.0124211	-0.4289	-0.125639	-0.137167	-0.257409	-0.109295		0	0	0	0	0	0	0	0	0.587175	0.850299	0.787656	0.950487	0.0458217	0.534991	0.502822	0.209153	0.90717	0.953576	0.923103	0.988519	0.297217	0.84821	0.824338	0.649468	SMED30010520	Sxlembryo_comp98630_c1_seq2	Sxlembryo	469	isotig19385	10	1	.	1	.	.	.	.	.	.
SMED30028129	0.0565459	0.1199	0.0870793	3.16975e-05	0.0198308	0.040003	0.030088	0.0314718	0.0565459		0	0	0	0	0	0	0	0	0.305606	0.0291068	0.112716	0.999549	0.722927	0.470038	0.589114	0.568626	0.781683	0.214328	0.376359	0.999944	0.919039	0.812005	0.865762	0.876557	SMED30028129	AsxlWT_comp28792_c0_seq1	AsxlWT	880	SMEDS2F2_0000597	1	1	.	0	F1MM41	5e-37	E3 ubiquitin-protein ligase ZNRF1	CDJ94339.1	4e-35	Zinc finger domain containing protein [Haemonchus contortus]
SMED30033129	-0.00894311	-0.121197	-1.87305	-0.213677	-0.0362045	-0.239208	0.0667758	-0.772742	-0.00894311		0	0	0	0	0	0	0	0	0.986913	0.827644	0.0113935	0.707722	0.948263	0.674447	0.902705	0.210495	0.998873	0.945823	0.0941266	0.924397	0.987694	0.90585	0.976318	0.651103	SMED30033129	uniq_sm_644593	033226_uniq	385	sm_644593	0	.	.	.	.	.	.	.	.	.
SMED30006924	0.111078	0.17407	0.189739	0.230803	0.190026	0.121079	0.0127152	-0.0108034	0.111078		0	0	0	0	0	0	0	0	0.0369865	0.00105709	0.000347486	1.40529e-05	0.000365734	0.0230355	0.812521	0.839841	0.412012	0.0251465	0.00806797	0.000689349	0.0162421	0.229027	0.950111	0.962657	SMED30006924	AsxlWT_comp56709_c0_seq1	AsxlWT	3057	SMEDS2F2_0000807	13	1	YES	0	Q6Q4G3	2e-77	Aminopeptidase Q	XP_007952718.1	1e-82	aminopeptidase Q [Orycteropus afer afer]
SMED30014267	0.0689938	0.348812	0.285803	-0.128313	-0.0282063	-0.0312284	-0.125397	0.137768	0.0689938		0	0	0	0	0	0	0	0	0.720256	0.0635539	0.129484	0.515532	0.885706	0.872661	0.525946	0.470557	0.950834	0.321227	0.405987	0.855118	0.971139	0.969322	0.834933	0.830527	SMED30014267	uniq_smed013576	033226_uniq	645	smed013576	0	1	.	0	P20825	5e-11	Retrovirus-related Pol polyprotein from transposon 297	XP_003391163.1	1e-15	hypothetical protein LOC100633740, partial [Amphimedon queenslandica]
SMED30029046	-0.19781	-0.564129	-0.614905	-0.435223	0.0120406	-0.0261339	-0.141712	-0.0890546	-0.19781	9	0	-1	-1	0	0	0	0	0	0.000713245	2.75914e-21	5.92664e-25	2.13109e-13	0.836088	0.652711	0.0154327	0.125476	0.047694	2.5885e-18	5.39162e-22	6.52833e-11	0.955389	0.898168	0.175031	0.538362	SMED30029046	AsxlWT_comp60778_c0_seq2	AsxlWT	2382	SMEDS2F2_0001031	5	1	.	1	P82987	3e-26	ADAMTS-like protein 3	CCD78356.1	9e-131	putative adamts (A disintegrin and metalloprotease [Schistosoma mansoni]
SMED30007848	-0.0310345	-0.0182426	-0.0616706	0.0038304	0.000741542	-0.0480852	0.0295425	-0.0265101	-0.0310345		0	0	0	0	0	0	0	0	0.528103	0.710702	0.209899	0.938013	0.988034	0.32936	0.548551	0.58945	0.888918	0.902192	0.517809	0.985136	0.997026	0.723577	0.845618	0.883733	SMED30007848	AsxlWT_comp47890_c0_seq1	AsxlWT	2255	SMEDS2F2_0002874	0	1	.	0	A6QLT2	6e-142	Myotubularin-related protein 2 [Bos taurus]	GAA56105.1	4e-149	myotubularin-related protein 2 [Clonorchis sinensis]
SMED30002182	0.231161	-0.811207	-0.369023	-0.767015	-0.601805	-0.251977	-0.196039	-0.157386	0.231161		0	0	0	0	0	0	0	0	0.442106	0.0186991	0.252966	0.026373	0.0764524	0.431584	0.540897	0.616763	0.852908	0.166864	0.565851	0.232261	0.375029	0.790952	0.843004	0.889711	SMED30002182	AsxlX1_comp47337_c0_seq2	AsxlX1	457	NA	NA	1	.	1	.	.	.	DAA33910.1	3e-49	TPA_inf: neuropeptide Y prohormone-11 [Schmidtea mediterranea]
SMED30031155	0.197852	0.171524	0.241839	0.109183	0.221999	0.116321	0.182049	0.0599251	0.197852		0	0	0	0	0	0	0	0	0.0257759	0.0540875	0.00602554	0.225513	0.0131286	0.194729	0.0422277	0.504379	0.348881	0.297719	0.0616961	0.648292	0.152052	0.595935	0.294785	0.846445	SMED30031155	Sxlembryo_comp90054_c0_seq3	Sxlembryo	1542	SMEDS2F2_0001276	0	2	.	0	Q9V429	5e-15	Thioredoxin-2	XP_007406244.1	2e-19	hypothetical protein MELLADRAFT_103088 [Melampsora larici-populina 98AG31]
SMED30035936	0.316877	-0.266194	-0.0268807	0.365501	0.773076	0.595721	0.113814	0.886093	0.316877	1	0	0	0	0	1	0	0	1	0.249812	0.383524	0.926335	0.184505	0.00278239	0.0236306	0.694253	0.00035302	0.745255	0.725495	0.974937	0.601611	0.0598782	0.232595	0.911267	0.0177819	SMED30035936	uniq_sm_rc_636052	033226_uniq	379	sm_rc_636052	0	.	.	.	.	.	.	.	.	.
SMED30008486	-0.166137	-0.37665	-0.506865	-0.2038	-0.119801	-0.229839	-0.341729	-0.151902	-0.166137		0	0	-1	0	0	0	0	0	0.198315	0.00364292	9.40381e-05	0.11494	0.35391	0.0754252	0.00834896	0.23936	0.694981	0.0593081	0.00296532	0.492614	0.7258	0.40889	0.120574	0.679704	SMED30008486	Sxlembryo_comp101238_c0_seq1	Sxlembryo	11364	BRcontig140	4	1	.	0	.	.	.	.	.	.
SMED30013117	-0.242114	-0.116693	-0.0680719	0.0630224	-0.169739	0.0901856	-0.202558	0.109154	-0.242114		0	0	0	0	0	0	0	0	0.287978	0.604144	0.760333	0.776796	0.457037	0.683088	0.376007	0.619707	0.769692	0.851024	0.912053	0.944329	0.796342	0.910249	0.748572	0.890665	SMED30013117	Sxlregen_comp8682_c0_seq1	Sxlregen	2005	NA	NA	2	.	0	.	.	.	.	.	.
SMED30010513	-0.508272	-0.358084	-0.364095	-0.477785	-0.392165	-0.0398141	-0.374793	-0.250995	-0.508272		0	0	0	0	0	0	0	0	0.0179682	0.0880952	0.0810464	0.0267545	0.0676354	0.842206	0.0787435	0.220944	0.300566	0.381027	0.313422	0.2341	0.355913	0.961824	0.394059	0.661458	SMED30010513	SRG12_32149_c0s4	SRG12	778	NA	NA	1	.	0	.	.	.	.	.	.
SMED30018750	0.234015	0.280077	-0.004282	0.179746	0.130864	0.280705	-0.119439	0.301085	0.234015		0	0	0	0	0	0	0	0	0.287338	0.200901	0.984898	0.420926	0.562081	0.200505	0.608252	0.166205	0.769692	0.554053	0.995778	0.802225	0.853114	0.603288	0.875136	0.59842	SMED30018750	Sxlembryo_comp98918_c0_seq2	Sxlembryo	1689	smed022411	0	1	.	0	.	.	.	.	.	.
SMED30028295	-0.129967	-0.0834499	-0.334233	-0.255048	-0.176314	-0.537765	-0.175298	0.131638	-0.129967		0	0	0	0	0	0	0	0	0.75263	0.839018	0.426668	0.544746	0.674262	0.215138	0.67545	0.741311	0.958706	0.949493	0.722142	0.864659	0.902572	0.620072	0.903906	0.937443	SMED30028295	uniq_sm_522432	033226_uniq	687	sm_522432	0	1	.	0	.	.	.	.	.	.
SMED30002271	0.402883	1.03575	-0.365177	0.229684	0.034124	-0.317151	-0.265753	0.173565	0.402883		0	0	0	0	0	0	0	0	0.612067	0.157146	0.677888	0.778275	0.967265	0.719029	0.763651	0.832012	0.913991	0.49778	0.872005	0.944417	0.992362	0.921532	0.932075	0.961142	SMED30002271	SxlWT_comp54793_c0_seq1	SxlWT	905	SMEDS2F2_0000016	0	1	.	0	Q2KIU7	2e-76	Radial spoke head protein 9 homolog [Bos taurus]	ESO86151.1	5e-97	hypothetical protein LOTGIDRAFT_195269 [Lottia gigantea]
SMED30021053	0.0390811	-0.413725	-0.0231401	-0.59911	-0.130345	-0.727311	-0.671959	-1.06643	0.0390811		0	0	0	0	0	0	0	-1	0.893126	0.188741	0.936918	0.0674085	0.669048	0.0289843	0.0439874	0.00227574	0.982002	0.540276	0.979208	0.380999	0.900694	0.256754	0.299967	0.0631423	SMED30021053	SxlWT_comp628409_c0_seq1	SxlWT	924	sm_rc_447890	0	1	.	0	.	.	.	.	.	.
SMED30033658	-0.222679	-0.75582	-0.318888	-0.316121	-0.585368	-0.721468	-0.295148	-0.314402	-0.222679		0	-1	0	0	0	-1	0	0	0.358979	0.00376117	0.192546	0.202041	0.0233379	0.00552704	0.233545	0.19911	0.812728	0.0606413	0.497608	0.623236	0.207533	0.103219	0.634389	0.638415	SMED30033658	dd_smedV4_19267_0_1	Dresden	543	smed28012	3	1	.	0	.	.	.	.	.	.
SMED30022866	-0.382389	-0.191912	0.323837	-0.152092	-1.22988	-0.438929	-1.10733	-0.298437	-0.382389	7	0	0	0	0	-1	0	-1	0	0.217569	0.52385	0.238864	0.613718	0.000738781	0.162614	0.00184121	0.326869	0.716742	0.812438	0.552485	0.88951	0.0255812	0.558632	0.0462454	0.74758	SMED30022866	uniq_smed018832	033226_uniq	456	smed018832	0	1	.	0	Q61581	3e-12	Insulin-like growth factor-binding protein 7	CAX73596.1	2e-23	Kazal-type serine protease inhibitor domain-containing protein 1 precursor [Schistosoma japonicum]
SMED30027366	0.257595	-0.102532	0.3616	0.143642	-0.213366	-0.153228	-0.383764	0.0246561	0.257595		0	0	0	0	0	0	0	0	0.245876	0.658916	0.0978133	0.52623	0.37063	0.512701	0.114506	0.913755	0.742002	0.879338	0.347674	0.858445	0.738621	0.836854	0.469042	0.980479	SMED30027366	uniq_sm_rc_146479	033226_uniq	793	sm_rc_146479	0	.	.	.	.	.	.	EFN61754.1	3e-13	hypothetical protein EAG_05343 [Camponotus floridanus]
SMED30035608	0.113675	0.136644	0.0876499	0.00396344	0.0317909	0.0556168	-0.00636387	0.0422555	0.113675		0	0	0	0	0	0	0	0	0.208311	0.129917	0.331703	0.965605	0.729991	0.541508	0.944989	0.641595	0.706315	0.456506	0.643097	0.992327	0.921793	0.851221	0.98659	0.90032	SMED30035608	AsxlX1_comp65952_c0_seq1	AsxlX1	1739	SMEDS2F2_0002298	7	2	.	0	.	.	.	.	.	.
SMED30009007	0.352221	0.0673707	0.0978884	0.637826	0.17048	0.528523	0.368181	0.548944	0.352221		0	0	0	1	0	0	0	0	0.12565	0.776143	0.677503	0.00455325	0.471777	0.0195925	0.111766	0.0147037	0.614731	0.927451	0.871756	0.0744675	0.806671	0.210883	0.462904	0.195509	SMED30009007	AsxlX1_comp53930_c0_seq1	AsxlX1	547	AAA.454ESTABI.53	0	1	.	0	.	.	.	.	.	.
SMED30023708	0.171343	0.270618	0.249141	0.283845	0.218588	0.335198	0.251279	0.330722	0.171343		0	0	0	0	0	0	0	0	0.0135105	8.01804e-05	0.0002734	3.76751e-05	0.00174768	8.88617e-07	0.00029209	1.10274e-06	0.266233	0.00339506	0.00671115	0.00158002	0.0447672	0.000177848	0.0130101	0.000165526	SMED30023708	AsxlWT_comp18192_c0_seq1	AsxlWT	1035	SMEDS2F2_0001211	4	1	.	0	Q9BYN7	2e-11	Zinc finger protein 341 [Homo sapiens]	AFD29622.1	0	ZFP-1 [Schmidtea mediterranea]
SMED30014114	-0.00854168	-0.00872662	0.00482971	0.0886445	0.136607	0.0633853	0.0859177	0.188561	-0.00854168		0	0	0	0	0	0	0	0	0.882468	0.880001	0.93323	0.124278	0.0178939	0.271402	0.136704	0.000975888	0.980644	0.96346	0.977888	0.512558	0.180024	0.676921	0.507569	0.0353403	SMED30014114	AsxlWT_comp54698_c1_seq1	AsxlWT	1898	SMEDS2F2_0003192	1	1	.	0	A4UTP7	1e-44	Myocyte-specific enhancer factor 2C	XP_002609948.1	4e-45	hypothetical protein BRAFLDRAFT_59582 [Branchiostoma floridae]
SMED30012024	-0.0806488	0.0600612	0.139397	0.0556612	-0.312226	-0.18496	0.145427	0.100595	-0.0806488		0	0	0	0	0	0	0	0	0.734334	0.796923	0.543434	0.812913	0.211175	0.444779	0.532423	0.663119	0.954685	0.935472	0.799501	0.953544	0.595331	0.79856	0.838036	0.908989	SMED30012024	Sxlembryo_comp103399_c0_seq1	Sxlembryo	396	isotig25985	0	1	.	0	O43439	6e-06	Protein CBFA2T2	XP_003560376.1	4e-06	uncharacterized protein LOC100846465 [Brachypodium distachyon]
SMED30019174	-0.0926601	0.38735	0.0709761	0.0872587	-0.994363	-0.574325	-0.521904	-0.436937	-0.0926601		0	0	0	0	0	0	0	0	0.851947	0.410106	0.88406	0.858928	0.0803081	0.27962	0.326552	0.398777	0.976419	0.744924	0.958816	0.966922	0.384724	0.684592	0.718952	0.794681	SMED30019174	Sxlembryo_comp94134_c0_seq1	Sxlembryo	503	NA	NA	1	.	0	.	.	.	XP_004208530.1	4e-16	uncharacterized protein LOC101238803 [Hydra vulgaris]
SMED30018817	0.152266	-0.068891	-0.230377	0.0684087	0.0185741	0.225411	0.0335778	0.165877	0.152266		0	0	0	0	0	0	0	0	0.144399	0.524354	0.0367156	0.521024	0.863847	0.0294158	0.755262	0.109589	0.643154	0.812734	0.199536	0.85669	0.964692	0.258138	0.929965	0.514137	SMED30018817	Asxlsort_comp80155_c0_seq15	Asxlsort	1358	NA	NA	2	.	0	.	.	.	.	.	.
SMED30033136	0.0306992	0.125687	0.141436	0.108525	0.0667302	0.0482906	0.0544878	0.00620136	0.0306992		0	0	0	0	0	0	0	0	0.573439	0.0201318	0.00854093	0.0460636	0.224484	0.376049	0.320418	0.909467	0.906265	0.174856	0.0776525	0.31429	0.60962	0.758439	0.714125	0.979097	SMED30033136	AsxlWT_comp48909_c0_seq1	AsxlWT	1684	SMEDS2F2_0001613	0	1	YES	1	Q9TU32	2e-63	Protein ERGIC-53	XP_002156538.2	1e-73	protein ERGIC-53-like [Hydra vulgaris]
SMED30005027	0.0992793	0.00740858	0.112857	0.0155306	0.0413466	0.119077	0.0297794	0.0936583	0.0992793		0	0	0	0	0	0	0	0	0.191019	0.923182	0.13514	0.840529	0.593329	0.116917	0.700015	0.216239	0.691234	0.977373	0.415296	0.962064	0.866332	0.490083	0.912078	0.655774	SMED30005027	AsxlWT_comp58456_c0_seq1	AsxlWT	2110	sm_rc_217546	5	1	.	8	.	.	.	CDJ12002.1	1e-08	lysine specific demethylase 6a [Hymenolepis microstoma]
SMED30030289	0.157921	0.0966606	-0.0555371	-0.022995	-0.240604	-0.147176	-0.219913	-0.302375	0.157921		0	0	0	0	0	0	0	0	0.0721674	0.271254	0.527594	0.793757	0.00638232	0.094555	0.012607	0.000605514	0.524155	0.629327	0.788907	0.948168	0.0996897	0.450158	0.155942	0.0252124	SMED30030289	Sxlembryo_comp100484_c0_seq7	Sxlembryo	1121	SMEDS2F2_0000839	12	1	.	0	P53471	0	Actin-2	CCG28026.1	0	actin I [Sepia officinalis]
SMED30031115	-0.328817	-0.493944	-0.661428	-0.516856	-0.288951	-0.152086	-0.0966058	-0.799264	-0.328817		0	0	0	0	0	0	0	0	0.359908	0.182173	0.0803096	0.167817	0.426619	0.663654	0.78259	0.0391889	0.813646	0.530664	0.311818	0.580151	0.775932	0.902167	0.939216	0.324031	SMED30031115	uniq_sm_530964	033226_uniq	394	sm_530964	0	.	.	.	.	.	.	.	.	.
SMED30034507	0.207473	-0.749877	-0.322737	-0.0580016	-0.533527	0.000930595	-0.55114	-1.08978	0.207473		0	0	0	0	0	0	0	0	0.640928	0.153482	0.50529	0.901788	0.30047	0.998396	0.284479	0.0485766	0.922305	0.49156	0.7737	0.975197	0.682071	0.999577	0.681538	0.358438	SMED30034507	Sxlembryo_comp44899_c0_seq1	Sxlembryo	964	smed018065	0	1	.	7	Q8BZ39	6e-33	Neuromedin-U receptor 2	EKC33871.1	9e-42	Neuropeptide capa receptor [Crassostrea gigas]
SMED30002246	-0.059202	0.144999	0.439299	0.351048	0.232349	0.128616	0.320681	0.334611	-0.059202		0	0	0	0	0	0	0	0	0.634632	0.242852	0.000381858	0.00461894	0.061372	0.300457	0.00971375	0.00689032	0.920667	0.601839	0.00866496	0.0752417	0.340094	0.702428	0.132963	0.127452	SMED30002246	AsxlWT_comp60598_c1_seq2	AsxlWT	347	NA	NA	1	.	0	.	.	.	.	.	.
SMED30005119	-0.00635169	-0.0986677	0.0780624	0.0424202	-0.0155465	0.219096	0.0907002	0.30546	-0.00635169		0	0	0	0	0	0	0	0	0.982333	0.733989	0.783096	0.88275	0.957436	0.436094	0.751925	0.272147	0.99856	0.91201	0.920623	0.972973	0.98937	0.793261	0.929212	0.706827	SMED30005119	AsxlX1_comp84393_c0_seq33	AsxlX1	903	sm_575413	0	1	.	0	.	.	.	.	.	.
SMED30024335	0.244233	0.510216	0.778176	-0.00922645	0.54977	-0.454189	0.328628	0.0891381	0.244233		0	0	0	0	0	0	0	0	0.537416	0.183287	0.0353336	0.981985	0.153585	0.298712	0.407028	0.824709	0.892967	0.532113	0.195267	0.996745	0.516904	0.701527	0.771579	0.959799	SMED30024335	uniq_sm_528147	033226_uniq	619	sm_528147	0	.	.	.	.	.	.	.	.	.
SMED30023294	-0.131225	-0.208106	-0.272299	-0.234144	-0.0839647	-0.138902	-0.227799	-0.160932	-0.131225		0	0	0	0	0	0	0	0	0.16735	0.0296281	0.00449557	0.0149468	0.379381	0.144764	0.0181021	0.0906714	0.669428	0.216674	0.0507756	0.165579	0.743278	0.533847	0.191017	0.472366	SMED30023294	AsxlWT_comp62059_c0_seq1	AsxlWT	1703	SMEDS2F2_0000996	5	2	.	10	Q9WTW5	2e-36	Solute carrier family 22 member 3	CDJ10126.1	8e-47	solute carrier family 22 [Hymenolepis microstoma]
SMED30006397	0.103462	-0.18742	-0.524493	0.0955767	-0.319155	0.376306	-0.261176	-0.521352	0.103462		0	0	0	0	0	0	0	0	0.796907	0.656998	0.235952	0.813843	0.466491	0.330257	0.545974	0.238866	0.968568	0.878331	0.549398	0.953544	0.80315	0.724226	0.84438	0.679458	SMED30006397	Sxlembryo_comp100492_c0_seq8	Sxlembryo	782	smed013234	2	1	.	0	Q96M20	3e-05	Cyclic nucleotide-binding domain-containing protein 2 [Homo sapiens]	XP_006818445.1	3e-15	uncharacterized protein LOC102804482 [Saccoglossus kowalevskii]
SMED30018197	-0.581026	-0.864674	-0.609901	0.0909043	-0.0479854	0.068469	-0.26518	-0.899518	-0.581026		0	0	0	0	0	0	0	0	0.445841	0.278091	0.4229	0.896126	0.946438	0.921827	0.718672	0.258302	0.854241	0.636664	0.719272	0.973593	0.987521	0.983724	0.918923	0.694493	SMED30018197	Sxlembryo_comp93566_c0_seq1	Sxlembryo	313	NA	NA	1	.	0	.	.	.	.	.	.
SMED30020325	-0.00531937	0.030075	0.0742365	0.0200289	0.0432897	-0.00636802	0.0413555	0.0170262	-0.00531937		0	0	0	0	0	0	0	0	0.923378	0.585931	0.176058	0.717793	0.435821	0.908485	0.45571	0.757476	0.98791	0.841677	0.477327	0.927558	0.781354	0.97975	0.803049	0.941232	SMED30020325	AsxlWT_comp54402_c1_seq1	AsxlWT	1478	SMEDS2F2_0003415	5	1	.	0	Q0IHV2	2e-53	Protein lin-54 homolog [Xenopus (Silurana) tropicalis]	CCD82040.1	5e-91	tesmin-related [Schistosoma mansoni]
SMED30004995	-0.289773	-0.479746	-0.64511	-0.160317	-0.116083	-0.398672	-0.460938	-0.726765	-0.289773		0	0	0	0	0	0	0	-1	0.236202	0.0571687	0.0120317	0.50749	0.631596	0.110187	0.0700297	0.00521372	0.733143	0.305858	0.0975699	0.851829	0.884988	0.478044	0.37284	0.107723	SMED30004995	AsxlX1_comp70363_c0_seq4	AsxlX1	1231	SMEDS2F2_0002046	2	2	.	0	P52484	3e-44	Probable ubiquitin-conjugating enzyme E2 21	XP_003382495.1	2e-45	ubiquitin-conjugating enzyme E2 K-like [Amphimedon queenslandica]
SMED30003423	0.190458	0.164346	0.0889938	0.169348	0.0137757	0.142669	-0.0753104	0.0793052	0.190458		0	0	0	0	0	0	0	0	0.145757	0.212057	0.50162	0.201294	0.920069	0.28153	0.587604	0.550151	0.643591	0.567748	0.770998	0.62229	0.980212	0.686999	0.86549	0.868924	SMED30003423	SxlWT_comp61887_c0_seq2	SxlWT	576	NA	NA	1	.	0	Q9P2E3	1e-05	NFX1-type zinc finger-containing protein 1 [Homo sapiens]	ELU17905.1	8e-20	hypothetical protein CAPTEDRAFT_193995 [Capitella teleta]
SMED30003453	-0.170128	-0.189692	-0.159724	-0.104918	-0.251036	-0.198489	-0.158814	-0.0970215	-0.170128		0	0	0	0	0	0	0	0	0.00965997	0.00393809	0.0150026	0.110394	0.000146335	0.00257072	0.0158995	0.139061	0.224633	0.0625314	0.113678	0.484805	0.00848095	0.063388	0.17764	0.558978	SMED30003453	AsxlX1_comp82330_c0_seq10	AsxlX1	4661	SMEDS2F2_0002827	0	6	YES	4	Q91755	2e-55	Glutamate receptor ionotropic, kainate 2	CCD81498.1	1e-69	putative glutamate receptor, kainate [Schistosoma mansoni]
SMED30034682	-0.204579	-0.168646	0.0148792	-0.0383777	-0.0371775	-0.163492	-0.122196	-0.091181	-0.204579		0	0	0	0	0	0	0	0	0.0404913	0.0905867	0.879246	0.698261	0.70824	0.101055	0.220948	0.35612	0.427516	0.386354	0.957103	0.921402	0.914196	0.462092	0.620901	0.76953	SMED30034682	AsxlWT_comp59998_c0_seq1	AsxlWT	1723	SMEDS2F2_0002673	3	1	.	5	P17971	7e-162	Potassium voltage-gated channel protein Shal	XP_005282444.1	1e-166	potassium voltage-gated channel subfamily D member 1 [Chrysemys picta bellii]
SMED30012099	0.0366916	0.0447901	0.0666075	0.0202309	0.0485401	0.0588476	0.115568	0.016254	0.0366916		0	0	0	0	0	0	0	0	0.525933	0.438773	0.247761	0.727703	0.404459	0.309009	0.0457519	0.77878	0.888118	0.757201	0.560526	0.930174	0.760895	0.709986	0.304909	0.947546	SMED30012099	AsxlWT_comp56540_c0_seq1	AsxlWT	1693	SMEDS2F2_0002219	10	1	.	0	Q9BY44	5e-57	Eukaryotic translation initiation factor 2A	XP_972330.1	3e-60	eukaryotic translation initiation factor 2A [Tribolium castaneum]
SMED30026320	-0.0670031	0.038867	0.0595729	-0.0171055	0.0138225	0.0812242	-0.0385182	0.156193	-0.0670031		0	0	0	0	0	0	0	0	0.520351	0.706345	0.561106	0.869744	0.894881	0.429659	0.713342	0.124081	0.886899	0.899957	0.813452	0.969581	0.973517	0.789935	0.916469	0.536629	SMED30026320	berlin_CUFF.217363.1	Berlin	422	NA	NA	1	.	0	.	.	.	.	.	.
SMED30003336	-0.225621	-0.13224	-0.2488	-0.14906	-0.336364	-0.325277	-0.0588117	-0.153773	-0.225621		0	0	0	0	0	0	0	0	0.139452	0.380991	0.102767	0.327965	0.0324847	0.0361314	0.696932	0.307542	0.637827	0.72374	0.357358	0.742746	0.247142	0.286578	0.911949	0.732927	SMED30003336	Sxlembryo_comp102190_c0_seq18	Sxlembryo	3288	SMEDS2F2_0001078	5	2	.	0	.	.	.	.	.	.
SMED30034274	-0.0274838	-0.108051	-0.396749	-0.263913	-0.216889	-0.579883	0.0501529	-0.629772	-0.0274838		0	0	0	0	0	0	0	0	0.9349	0.751902	0.26602	0.455959	0.540517	0.119207	0.881653	0.0901678	0.989415	0.919839	0.579559	0.822617	0.842084	0.493345	0.971077	0.471582	SMED30034274	Sxlembryo_comp80442_c0_seq1	Sxlembryo	1087	NA	NA	1	.	7	Q5IS66	3e-07	5-hydroxytryptamine receptor 2C	XP_001625910.1	5e-10	predicted protein [Nematostella vectensis]
SMED30005283	-0.256692	-0.0876252	-0.00543158	-0.114399	-0.0374883	0.0957743	0.0369551	0.0154976	-0.256692		0	0	0	0	0	0	0	0	0.00838612	0.361094	0.954351	0.236475	0.697242	0.310983	0.698761	0.870133	0.208128	0.708246	0.985878	0.658264	0.908962	0.711262	0.911974	0.970365	SMED30005283	AsxlWT_comp25368_c0_seq1	AsxlWT	950	SMEDS2F2_0001130	4	1	.	0	.	.	.	.	.	.
SMED30019084	-0.0485485	-0.30539	-0.408505	-0.336993	-0.0504617	-0.256576	-0.270902	-0.281813	-0.0485485		0	0	0	0	0	0	0	0	0.729785	0.0380329	0.00602499	0.0238959	0.724502	0.0795689	0.067753	0.0529199	0.954103	0.246299	0.0616961	0.219718	0.919245	0.417465	0.368412	0.373462	SMED30019084	AsxlWT_comp61576_c0_seq12	AsxlWT	1317	SMEDS2F2_0001110	3	2	.	5	Q6R5J2	2e-11	Protein dispatched homolog 1	XP_002736516.1	2e-19	protein dispatched homolog 1-like [Saccoglossus kowalevskii]
SMED30002781	-0.0425055	0.248572	-0.479141	-0.114805	0.0823099	0.0873334	0.12512	-0.168763	-0.0425055		0	0	0	0	0	0	0	0	0.861888	0.289183	0.0647514	0.644503	0.735071	0.716625	0.604105	0.495896	0.977674	0.647975	0.27864	0.901179	0.923599	0.920278	0.872962	0.842121	SMED30002781	uniq_sm_714642	033226_uniq	398	sm_714642	0	.	.	.	.	.	.	.	.	.
SMED30033735	-0.138839	-0.203017	-0.262673	-0.137658	-0.0661756	-0.0816482	-0.134885	-0.0403196	-0.138839		0	0	0	0	0	0	0	0	0.0165859	0.000487951	6.60184e-06	0.0179476	0.254545	0.157915	0.0205385	0.483405	0.291185	0.0140583	0.000339373	0.185859	0.637889	0.55267	0.203763	0.835622	SMED30033735	SxlWT_comp56433_c0_seq4	SxlWT	5440	SMEDS2F2_0001101	0	1	.	0	A1L0Y2	1e-116	Neuralized-like protein 4	EFX70468.1	1e-137	hypothetical protein DAPPUDRAFT_309455 [Daphnia pulex]
SMED30006094	-1.09018	-0.848044	-1.40691	0.44879	-0.203149	-0.280866	-0.0862213	0.187537	-1.09018		0	0	0	0	0	0	0	0	0.130613	0.22309	0.0613301	0.440245	0.752039	0.66181	0.891255	0.753934	0.62171	0.579761	0.270153	0.813776	0.929859	0.901473	0.973516	0.940476	SMED30006094	SRG12_5044_c0s1	SRG12	315	sm_547234	1	1	.	0	.	.	.	CAP36217.2	9e-18	Protein CBG18874 [Caenorhabditis briggsae]
SMED30026722	0.166323	0.173492	0.268094	-0.0390623	-0.0685414	0.107205	-0.276572	-0.360966	0.166323		0	0	0	0	0	0	0	0	0.450708	0.431453	0.214186	0.865075	0.768608	0.631302	0.249596	0.130906	0.855719	0.754204	0.523112	0.968322	0.934242	0.889998	0.650785	0.546964	SMED30026722	AsxlWT_comp50048_c0_seq1	AsxlWT	634	smed26127	0	1	.	1	.	.	.	.	.	.
SMED30010056	0.0664898	0.107005	0.152814	0.129988	0.0484388	0.086319	0.124322	0.0919953	0.0664898		0	0	0	0	0	0	0	0	0.187291	0.0335502	0.00228861	0.00991199	0.340347	0.0869486	0.0138009	0.0673419	0.688123	0.229538	0.0319416	0.126786	0.717966	0.43379	0.164281	0.417787	SMED30010056	Sxlembryo_comp72087_c0_seq1	Sxlembryo	702	SMEDS2F2_0000021	0	1	.	0	Q24491	4e-20	RNA-binding protein Rsf1	CAX70068.1	7e-22	Serine/arginine repetitive matrix protein 2 [Schistosoma japonicum]
SMED30001256	0.120388	0.12923	0.180019	-0.0879791	0.0407724	0.0950847	0.101486	0.0437896	0.120388		0	0	0	0	0	0	0	0	0.646973	0.623042	0.486845	0.748645	0.880362	0.719757	0.704266	0.868703	0.924162	0.860445	0.761429	0.93732	0.969173	0.921683	0.913345	0.969569	SMED30001256	Asxlsort_comp77371_c0_seq1	Asxlsort	869	NA	NA	1	.	0	.	.	.	.	.	.
SMED30013154	-0.00267936	0.0944172	-0.283146	-0.574446	-0.103261	-0.53188	-0.6178	-0.453414	-0.00267936		0	0	0	0	0	0	0	0	0.993863	0.783073	0.436038	0.139272	0.77488	0.165579	0.11672	0.226185	0.998976	0.930771	0.729183	0.537085	0.935273	0.561744	0.473202	0.66601	SMED30013154	berlin_isotig13706	Berlin	424	isotig13706	0	.	.	.	.	.	.	.	.	.
SMED30007418	-0.145461	-0.136734	0.0939707	-0.707006	-0.388512	0.0620183	-0.682348	0.318466	-0.145461		0	0	0	0	0	0	0	0	0.78237	0.79515	0.852312	0.222787	0.484888	0.903519	0.239811	0.514017	0.96505	0.934881	0.946944	0.645366	0.814843	0.978448	0.641454	0.852464	SMED30007418	uniq_smed27495	033226_uniq	306	smed27495	0	.	.	.	.	.	.	.	.	.
SMED30008025	0.0261323	0.034413	0.0648885	0.116384	0.0666636	0.0629933	0.1333	0.0890698	0.0261323		0	0	0	0	0	0	0	0	0.621927	0.516149	0.217706	0.0275318	0.211267	0.23391	0.0116715	0.0901999	0.916809	0.80885	0.527544	0.238276	0.595478	0.640559	0.149095	0.471582	SMED30008025	AsxlX1_comp82877_c0_seq2	AsxlX1	1871	SMEDS2F2_0001061	4	1	.	0	Q3TJZ6	1e-46	Protein FAM98A [Mus musculus]	XP_006638896.1	1e-45	protein FAM98A-like [Lepisosteus oculatus]
SMED30015470	0.0804975	0.0476602	-0.0107025	-0.0851	-0.0905414	-0.103349	-0.140089	-0.255013	0.0804975		0	0	0	0	0	0	0	0	0.291729	0.532562	0.888547	0.265674	0.236534	0.17639	0.0670628	0.000863159	0.773442	0.817346	0.96085	0.687274	0.621081	0.575392	0.366269	0.0322701	SMED30015470	AsxlWT_comp64093_c0_seq1	AsxlWT	1014	SMEDS2F2_0001952	2	1	YES	0	P34714	7e-09	SPARC	ACM78480.1	6e-128	SPARC-like protein [Dugesia japonica]
SMED30025990	-0.00846491	-0.183944	-0.1475	-0.0873854	-0.00337417	-0.181179	-0.388799	-0.255151	-0.00846491		0	0	0	0	0	0	0	0	0.93057	0.0608469	0.131182	0.371881	0.97245	0.064966	9.72211e-05	0.00944344	0.988866	0.314893	0.408783	0.774606	0.994372	0.383775	0.00611882	0.152782	SMED30025990	AsxlWT_comp62150_c0_seq3	AsxlWT	3102	SMEDS2F2_0002047	1	1	.	0	Q9TU19	8e-55	Nephrocystin-1	NP_001186358.1	1e-62	nephrocystin-1 [Gallus gallus]
SMED30026911	0.342285	-0.135305	0.445674	0.652139	0.685359	0.496947	-0.808218	-0.375873	0.342285		0	0	0	0	0	0	0	0	0.599208	0.847468	0.485047	0.298969	0.274955	0.436601	0.307139	0.604048	0.91018	0.952329	0.760199	0.714971	0.656979	0.79375	0.701549	0.888758	SMED30026911	uniq_sm_714852	033226_uniq	614	sm_714852	0	.	.	.	.	.	.	.	.	.
SMED30015249	0.16444	-0.51932	-0.351993	-0.555632	-0.102889	0.0420168	0.0458951	-0.226262	0.16444		0	0	0	0	0	0	0	0	0.646043	0.198588	0.365977	0.175162	0.787736	0.908922	0.901533	0.552793	0.924029	0.550767	0.674261	0.590443	0.938942	0.97975	0.976303	0.870418	SMED30015249	OX_Smed_1.0.02185	Oxford	1229	smed022441	5	.	.	.	.	.	.	.	.	.
SMED30000862	-0.103422	-0.320683	-0.113313	-0.0841843	0.000328839	-0.186244	-0.261922	-0.111908	-0.103422		0	0	0	0	0	0	0	0	0.476069	0.0303099	0.434015	0.563149	0.998189	0.203504	0.0772777	0.440021	0.869959	0.218745	0.727503	0.870831	0.999203	0.605996	0.391273	0.817708	SMED30000862	AsxlX1_comp80120_c0_seq1	AsxlX1	2413	SMEDS2F2_0001987	9	2	.	1	Q6WRI0	2e-09	Immunoglobulin superfamily member 10	GAA43171.2	1e-21	leucine-rich repeat and fibronectin type-III domain-containing protein 5 [Clonorchis sinensis]
SMED30010784	-0.0211396	-0.0621816	-0.0600924	-0.0124952	0.171597	0.00604213	-0.0939189	-0.018987	-0.0211396		0	0	0	0	0	0	0	0	0.821061	0.508812	0.520603	0.894275	0.0632081	0.948425	0.32524	0.838384	0.971338	0.804755	0.784038	0.973593	0.344977	0.98851	0.717522	0.962433	SMED30010784	SxlWT_comp17649_c0_seq1	SxlWT	1186	SMEDS2F2_0000101	0	1	.	4	.	.	.	.	.	.
SMED30034638	-0.392214	-2.16938	-0.0918716	-1.2128	-0.122692	-0.570019	-0.626866	-0.244936	-0.392214		0	-1	0	0	0	0	0	0	0.39573	0.000529558	0.833066	0.0239891	0.784692	0.233371	0.199457	0.584382	0.83564	0.0150406	0.940881	0.21998	0.9385	0.639578	0.597297	0.881997	SMED30034638	AsxlX1_comp70802_c0_seq1	AsxlX1	955	isotig26185	0	1	.	0	.	.	.	.	.	.
SMED30001357	0.212042	-0.17901	0.233177	0.0596874	-0.1822	-0.0626831	-0.0231668	-0.0808327	0.212042		0	0	0	0	0	0	0	0	0.281196	0.396488	0.231596	0.769805	0.396466	0.762448	0.911375	0.694867	0.766111	0.735658	0.54416	0.942589	0.755175	0.937085	0.978972	0.920615	SMED30001357	AsxlWT_comp13030_c0_seq1	AsxlWT	677	sm_rc_80348	0	1	.	0	.	.	.	ELT99092.1	3e-05	hypothetical protein CAPTEDRAFT_228964 [Capitella teleta]
SMED30012366	0.194593	0.157836	0.0375185	0.00315205	0.108459	0.0241835	0.137839	0.080759	0.194593		0	0	0	0	0	0	0	0	0.00618149	0.0269111	0.601127	0.965333	0.133261	0.737591	0.0550643	0.259254	0.181225	0.20556	0.836622	0.992305	0.490052	0.928558	0.333756	0.694979	SMED30012366	AsxlWT_comp53835_c0_seq1	AsxlWT	1018	SMEDS2F2_0001944	0	1	.	1	.	.	.	.	.	.
SMED30019679	-0.14241	-0.413205	0.263861	-0.0982004	-0.329718	-0.120054	-0.302895	-0.24501	-0.14241		0	0	0	0	0	0	0	0	0.659624	0.221602	0.382715	0.761653	0.330416	0.710484	0.367571	0.453825	0.928542	0.578176	0.687707	0.940694	0.711033	0.919239	0.743528	0.823981	SMED30019679	Sxlregen_comp57277_c0_seq1	Sxlregen	1805	NA	NA	1	.	0	.	.	.	.	.	.
SMED30016276	-0.00470884	0.346727	-0.0588313	-0.662743	0.108389	-0.0202595	-0.0445267	0.207956	-0.00470884		0	0	0	0	0	0	0	0	0.988938	0.294211	0.862628	0.0674688	0.748873	0.952554	0.896684	0.532532	0.998873	0.652808	0.951534	0.381231	0.928232	0.98991	0.974603	0.861655	SMED30016276	uniq_sm_rc_652916	033226_uniq	546	sm_rc_652916	0	.	.	.	.	.	.	.	.	.
SMED30010913	0.10576	-0.12472	-0.251637	-0.21429	0.0349672	-0.203991	0.0594696	0.106523	0.10576		0	0	0	0	0	0	0	0	0.321594	0.252041	0.0217862	0.0519169	0.746855	0.0631133	0.581396	0.317422	0.791259	0.612673	0.144641	0.333034	0.927421	0.378325	0.862161	0.739051	SMED30010913	SxlWT_comp58084_c0_seq7	SxlWT	3001	SMEDS2F2_0000378	0	1	.	0	Q6XUX2	1e-47	Dual serine/threonine and tyrosine protein kinase	XP_002739351.1	1e-79	dual serine/threonine and tyrosine protein kinase-like [Saccoglossus kowalevskii]
SMED30012418	0.0265775	-0.015787	-0.143313	-0.0706654	0.0450052	0.0524482	-0.0461914	0.0321462	0.0265775		0	0	0	0	0	0	0	0	0.673696	0.802952	0.0240483	0.266206	0.477632	0.405952	0.467356	0.610151	0.934785	0.937043	0.153869	0.688057	0.809716	0.778877	0.80793	0.888758	SMED30012418	AsxlWT_comp14469_c0_seq1	AsxlWT	2184	SMEDS2F2_0000560	3	1	.	0	Q6A098	2e-39	Selenocysteine insertion sequence-binding protein 2-like	XP_002591343.1	1e-39	hypothetical protein BRAFLDRAFT_216514 [Branchiostoma floridae]
SMED30007312	-0.17079	0.648844	0.000847514	-0.236029	-0.188535	0.231803	0.156123	-0.434956	-0.17079		0	0	0	0	0	0	0	0	0.643994	0.0433027	0.998106	0.531603	0.617657	0.502947	0.659469	0.258291	0.923755	0.26562	0.999309	0.861407	0.878096	0.831197	0.897377	0.694493	SMED30007312	AsxlWT_comp1309569_c0_seq1	AsxlWT	453	SMEDS2F2_0002389	7	1	.	0	Q96DM1	0.0002	PiggyBac transposable element-derived protein 4	EFN87042.1	3e-27	PiggyBac transposable element-derived protein 4 [Harpegnathos saltator]
SMED30019337	-0.0544906	-0.112144	-0.17846	-0.0640038	0.0101933	-0.0871202	-0.0381468	-0.0695855	-0.0544906		0	0	0	0	0	0	0	0	0.474316	0.142752	0.0199312	0.403168	0.893831	0.254518	0.618071	0.36074	0.869107	0.476184	0.136642	0.790717	0.973517	0.662256	0.880229	0.772892	SMED30019337	AsxlWT_comp58976_c0_seq4	AsxlWT	2996	SMEDS2F2_0001995	0	1	.	0	Q9XYB7	2e-17	Nuclear hormone receptor family member nhr-8 [Caenorhabditis elegans]	CDJ07235.1	1e-20	Nuclear hormone receptor HR96 [Hymenolepis microstoma]
SMED30028230	0.31318	0.137613	-0.179128	0.12077	0.0781558	0.285163	-0.0363687	0.0726722	0.31318		0	0	0	0	0	0	0	0	0.246979	0.622346	0.541162	0.66884	0.785427	0.296134	0.900851	0.795711	0.743511	0.860445	0.798231	0.909945	0.9385	0.699064	0.976017	0.953403	SMED30028230	uniq_sm_584529	033226_uniq	482	sm_584529	0	.	.	.	.	.	.	.	.	.
SMED30028057	-0.113983	-0.282652	-0.29568	-0.266907	-0.10958	0.0741833	-0.153203	-0.102608	-0.113983		0	0	0	0	0	0	0	0	0.042077	7.12313e-07	1.98183e-07	3.06021e-06	0.0529235	0.179486	0.00689751	0.0665113	0.432601	6.48011e-05	1.7499e-05	0.000183375	0.317002	0.578645	0.106756	0.415645	SMED30028057	AsxlWT_comp47451_c0_seq1	AsxlWT	1510	SMEDS2F2_0003435	5	1	.	0	Q148A4	8e-31	Protein phosphatase 1 regulatory subunit 32	ELU14568.1	1e-83	hypothetical protein CAPTEDRAFT_180526 [Capitella teleta]
SMED30007126	-0.0901271	-0.127261	-0.146591	-0.13504	-0.0841758	-0.0165354	-0.0179233	0.0509249	-0.0901271		0	0	0	0	0	0	0	0	0.100247	0.020458	0.00755353	0.0140642	0.125801	0.762673	0.743804	0.351149	0.576038	0.176536	0.0720045	0.159028	0.476791	0.937085	0.928688	0.76542	SMED30007126	Sxlembryo_comp98745_c0_seq34	Sxlembryo	5132	SMEDS2F2_0002023	0	1	.	0	Q6DFF9	0	Mitogen-activated protein kinase-binding protein 1	ESO91984.1	0	hypothetical protein LOTGIDRAFT_121618, partial [Lottia gigantea]
SMED30006161	0.0731186	0.181276	0.171605	0.349375	0.214703	0.247234	0.284313	0.268268	0.0731186		0	0	0	0	0	0	0	0	0.356788	0.0219054	0.0298522	9.29148e-06	0.00677599	0.00174096	0.00032098	0.000666016	0.81188	0.183306	0.176	0.000479277	0.102947	0.0499669	0.0139071	0.0270928	SMED30006161	AsxlX1_comp76754_c0_seq4	AsxlX1	1655	SMEDS2F2_0002323	1	2	.	8	Q8C261	4e-57	Sodium/potassium/calcium exchanger 5	XP_002504896.1	9e-68	Ca2+:Cation antiporter family [Micromonas sp. RCC299]
SMED30002551	0.0695727	0.128782	0.136097	0.210082	0.0028974	0.135145	0.158291	0.0462918	0.0695727		0	0	0	0	0	0	0	0	0.299336	0.0543108	0.0416412	0.00167416	0.96574	0.0434787	0.018183	0.489837	0.778192	0.298074	0.21617	0.0354944	0.991908	0.31536	0.191297	0.83911	SMED30002551	AsxlWT_comp41841_c1_seq1	AsxlWT	932	SMEDS2F2_0001007	2	1	.	5	A1A5V7	4e-48	Transmembrane protein 41B	CCD59002.1	6e-60	D2013.10 [Schistosoma mansoni]
SMED30004957	-0.0522298	0.0161437	-0.112167	-0.00257675	0.0976075	0.122361	0.189922	0.192452	-0.0522298		0	0	0	0	0	0	0	0	0.337238	0.765968	0.0396277	0.962256	0.0723291	0.0233828	0.000430836	0.000336473	0.800523	0.924725	0.209424	0.991636	0.366047	0.231092	0.0171167	0.0171784	SMED30004957	AsxlWT_comp62052_c0_seq8	AsxlWT	2902	SMEDS2F2_0001553	1	2	.	9	Q4KMQ2	1e-99	Anoctamin-6	CDJ06918.1	2e-153	protein of unknown function DUF590 [Hymenolepis microstoma]
SMED30024030	-0.399236	-0.428323	-0.0494409	0.147435	-0.383267	-0.299904	-0.0345098	-0.206939	-0.399236		0	0	0	0	0	0	0	0	0.214666	0.185962	0.870524	0.62068	0.240668	0.345619	0.910878	0.505567	0.713197	0.535929	0.953959	0.892305	0.624198	0.738794	0.978864	0.847485	SMED30024030	AsxlX1_comp78472_c0_seq3	AsxlX1	2079	NA	NA	2	.	0	.	.	.	XP_004213210.1	6e-13	zinc finger BED domain-containing protein 4-like [Hydra vulgaris]
SMED30002301	0.00536019	-0.131351	-0.0308659	-0.0458361	0.0714324	0.00244779	0.0259818	0.0620862	0.00536019		0	0	0	0	0	0	0	0	0.948006	0.113949	0.707385	0.580097	0.386718	0.976283	0.752984	0.447746	0.992732	0.43137	0.888833	0.877055	0.748114	0.995134	0.929212	0.821727	SMED30002301	AsxlWT_comp52018_c0_seq1	AsxlWT	1240	SMEDS2F2_0002288	1	1	.	0	O88764	1e-82	Death-associated protein kinase 3	CCD78383.1	3e-93	serine/threonine kinase [Schistosoma mansoni]
SMED30026156	0.0487897	0.0144881	0.292987	0.121709	0.403471	-0.13852	0.127249	0.148317	0.0487897		0	0	0	0	0	0	0	0	0.851516	0.956022	0.241117	0.639677	0.107735	0.606892	0.625614	0.562022	0.97611	0.989141	0.554389	0.898878	0.443733	0.877623	0.882426	0.873909	SMED30026156	OX_Smed_1.0.19096	Oxford	1233	NA	NA	.	.	.	.	.	.	.	.	.
SMED30035187	0.0843397	0.0808156	0.0570356	0.0286085	0.100562	0.137507	0.136468	-0.104557	0.0843397		0	0	0	0	0	0	0	0	0.401565	0.422019	0.570326	0.77774	0.3206	0.170421	0.175432	0.3039	0.837714	0.751048	0.820046	0.944417	0.702669	0.567482	0.566446	0.730923	SMED30035187	berlin_isotig14406	Berlin	324	SMEDS2F2_0002888	0	1	.	0	Q54ID0	5e-07	Cytochrome c oxidase copper chaperone [Dictyostelium discoideum]	ACO15401.1	4e-09	Cytochrome c oxidase copper chaperone [Caligus clemensi]
SMED30003071	0.13815	0.0635658	0.071256	0.0431224	0.240482	0.0683092	0.100655	-0.0874328	0.13815		0	0	0	0	0	0	0	0	0.146761	0.507535	0.455415	0.654819	0.0115996	0.476494	0.295293	0.366927	0.644961	0.803963	0.741793	0.906334	0.140756	0.816201	0.691596	0.777045	SMED30003071	berlin_isotig18289	Berlin	150	NA	NA	.	.	.	.	.	.	.	.	.
SMED30012551	-0.0903721	0.131334	-0.122077	0.254471	0.382624	0.500088	0.0201628	0.452606	-0.0903721		0	0	0	0	0	0	0	0	0.770228	0.660473	0.693054	0.388867	0.18988	0.0774517	0.947736	0.11013	0.963363	0.880023	0.880611	0.784612	0.568745	0.412866	0.987436	0.514169	SMED30012551	uniq_smed007805	033226_uniq	529	smed007805	0	.	.	.	.	.	.	.	.	.
SMED30035472	-0.169756	-0.236008	-0.381685	-0.0969487	-0.368514	-0.247964	0.0470547	-0.463604	-0.169756		0	0	0	0	0	0	0	0	0.492716	0.346617	0.134883	0.694209	0.158244	0.325043	0.845668	0.0735948	0.875234	0.69573	0.414728	0.919682	0.524371	0.72008	0.959683	0.435434	SMED30035472	OX_Smed_1.0.09392	Oxford	404	sm_670409	0	.	.	.	.	.	.	.	.	.
SMED30023915	0.0879824	0.170261	0.149639	0.0974753	0.105319	0.0775749	0.129603	0.062868	0.0879824		0	0	0	0	0	0	0	0	0.109315	0.00187655	0.00621682	0.076828	0.0565467	0.158676	0.018572	0.252607	0.591201	0.0377081	0.0630099	0.407493	0.327598	0.553183	0.193493	0.691069	SMED30023915	AsxlWT_comp67465_c0_seq1	AsxlWT	854	SMEDS2F2_0002058	1	1	.	0	Q5RJU0	3e-78	Vacuolar-sorting protein SNF8	CDJ19830.1	5e-84	vacuolar sorting protein SNF8 [Echinococcus granulosus]
SMED30027010	0.0228298	-0.201073	-0.000888098	-0.173117	0.0302606	0.175046	0.135178	-0.160588	0.0228298		0	0	0	0	0	0	0	0	0.887787	0.230815	0.995589	0.303339	0.853817	0.269383	0.40109	0.33245	0.981429	0.587396	0.999013	0.719122	0.960957	0.675752	0.767491	0.753052	SMED30027010	dd_smedV4_13500_0_1	Dresden	1252	sm_442695	11	1	.	0	.	.	.	.	.	.
SMED30028787	0.0429356	0.0618673	0.130242	0.0339887	0.0101196	0.145186	0.0646773	0.0564457	0.0429356		0	0	0	0	0	0	0	0	0.599281	0.448531	0.107355	0.679222	0.902701	0.0735846	0.431053	0.488285	0.91018	0.763083	0.366197	0.913785	0.976073	0.404224	0.786263	0.838729	SMED30028787	Sxlembryo_comp101312_c0_seq12	Sxlembryo	1216	smed015802	3	1	.	0	Q60803	1e-09	TNF receptor-associated factor 3	ABN04152.1	2e-09	tumor necrosis factor receptor-associated factor 3 [Branchiostoma belcheri]
SMED30023162	0.115417	0.143321	-0.127419	0.175378	-0.140453	0.0486537	0.0910033	0.055549	0.115417		0	0	0	0	0	0	0	0	0.59848	0.511903	0.571464	0.423219	0.540758	0.826256	0.682024	0.800975	0.910172	0.805949	0.820917	0.803579	0.842149	0.957423	0.906854	0.954179	SMED30023162	uniq_sm_rc_532066	033226_uniq	674	sm_rc_532066	0	.	.	.	.	.	.	.	.	.
SMED30023134	0.486949	0.424415	0.348672	0.3225	0.0113489	0.249869	0.439396	0.139855	0.486949		0	0	0	0	0	0	0	0	0.000730998	0.00341989	0.0164272	0.0279655	0.940237	0.089424	0.00253908	0.344575	0.0482314	0.0569924	0.120666	0.240974	0.986438	0.438732	0.0574854	0.760512	SMED30023134	uniq_SMEDS2F2_00020446-RA_1_594	033226_uniq	594	SMEDS2F2_0002044	0	1	.	0	Q5ZMM5	3e-23	Zinc finger protein 706 [Gallus gallus]	GAA37349.2	3e-27	zinc finger protein 706 [Clonorchis sinensis]
SMED30006070	-0.189806	-0.119449	-0.153779	-0.0827952	-0.0841741	-0.1616	-0.148238	-0.105785	-0.189806		0	0	0	0	0	0	0	0	0.00179714	0.0485991	0.0110745	0.17191	0.166469	0.00783936	0.0150129	0.0799182	0.0874424	0.281604	0.0925766	0.585949	0.537257	0.127409	0.172221	0.449829	SMED30006070	Sxlembryo_comp82608_c0_seq1	Sxlembryo	2219	smed015208	4	1	.	0	Q6ZSS3	1e-17	Zinc finger protein 621 [Homo sapiens]	CDJ24378.1	4e-32	zinc finger protein [Echinococcus granulosus]
SMED30000860	0.464713	0.586174	0.546854	0.183227	0.37127	0.0811911	0.41892	0.603255	0.464713		0	0	0	0	0	0	0	0	0.274715	0.160037	0.189886	0.684347	0.398856	0.858831	0.335472	0.144433	0.760954	0.501598	0.494289	0.915197	0.756942	0.966024	0.726708	0.565074	SMED30000860	uniq_sm_651698	033226_uniq	574	sm_651698	0	.	.	.	.	.	.	.	.	.
SMED30009472	0.44295	0.372973	0.162159	0.0484029	-0.423279	-0.0858542	0.0985315	-0.489491	0.44295		0	0	0	0	0	0	0	0	0.0422036	0.0915838	0.476486	0.837388	0.101928	0.720867	0.675094	0.055329	0.433317	0.387791	0.755693	0.961389	0.433916	0.922092	0.903848	0.382286	SMED30009472	AsxlX1_comp66403_c0_seq11	AsxlX1	1515	SMEDS2F2_0000309	2	2	.	8	.	.	.	.	.	.
SMED30010093	-0.12827	0.298297	0.350999	0.198485	0.018248	-0.131848	-0.212179	0.222835	-0.12827		0	0	0	0	0	0	0	0	0.615808	0.209165	0.133056	0.415087	0.942663	0.607741	0.420461	0.351345	0.914844	0.5641	0.411483	0.799041	0.986497	0.878263	0.778312	0.76542	SMED30010093	OX_Smed_1.0.10194	Oxford	376	NA	NA	.	.	.	.	.	.	.	.	.
SMED30009921	-0.157251	-0.150764	-0.190736	-0.60847	-0.218065	-0.414856	-0.100364	-0.143994	-0.157251		0	0	0	0	0	0	0	0	0.527944	0.545192	0.443807	0.0239992	0.393692	0.110813	0.68832	0.560811	0.888896	0.823507	0.735745	0.21998	0.752613	0.479147	0.908654	0.873332	SMED30009921	AsxlX1_comp81446_c0_seq7	AsxlX1	1579	NA	NA	1	.	1	.	.	.	.	.	.
SMED30029104	-0.028987	-0.0277664	0.0132007	0.050915	0.0472487	0.0697882	0.0338258	0.0451829	-0.028987		0	0	0	0	0	0	0	0	0.567809	0.584458	0.793563	0.314731	0.353004	0.166454	0.505559	0.369571	0.90488	0.841132	0.925326	0.730293	0.7258	0.562675	0.825868	0.778569	SMED30029104	AsxlWT_comp57637_c0_seq1	AsxlWT	3180	SMEDS2F2_0002489	4	1	YES	1	Q9BZA8	5e-69	Protocadherin-11 Y-linked	EUB56537.1	2e-130	Protocadherin [Echinococcus granulosus]
SMED30000988	-0.262607	-0.132818	-0.146043	-0.113498	-0.148549	-0.155453	-0.140827	-0.10376	-0.262607		0	0	0	0	0	0	0	0	0.00489505	0.148283	0.110505	0.218283	0.111129	0.0921409	0.129356	0.254569	0.158356	0.48466	0.37211	0.640135	0.450109	0.444506	0.495566	0.692973	SMED30000988	AsxlX1_comp83453_c0_seq15	AsxlX1	934	SMEDS2F2_0000631	4	2	.	0	Q05975	7e-94	Ras-related protein Rab-2	XP_002032634.1	5e-93	GM20894 [Drosophila sechellia]
SMED30035137	-0.172539	-0.249061	-0.288747	0.0808635	-0.104089	-0.356844	0.0617171	-0.0696619	-0.172539		0	0	0	0	0	0	0	0	0.512028	0.351156	0.279412	0.750206	0.694322	0.19113	0.809691	0.786398	0.883909	0.700004	0.593182	0.938323	0.908176	0.591741	0.94919	0.94952	SMED30035137	AsxlX1_comp65397_c0_seq2	AsxlX1	973	NA	NA	1	.	0	.	.	.	.	.	.
SMED30007864	-0.144367	-0.134981	-0.0327072	0.00559814	0.0389126	-0.0587086	-0.182697	-0.107199	-0.144367		0	0	0	0	0	0	0	0	0.0664253	0.0861375	0.673621	0.942764	0.618608	0.452864	0.0216455	0.170441	0.510145	0.376689	0.86976	0.986433	0.878473	0.803465	0.208924	0.603609	SMED30007864	AsxlWT_comp54420_c0_seq1	AsxlWT	1384	SMEDS2F2_0000989	2	1	.	0	Q9U2R0	1e-17	Probable RNA methyltransferase Y17G7B.18 [Caenorhabditis elegans]	GAA52351.1	1e-50	7SK snRNA methylphosphate capping enzyme [Clonorchis sinensis]
SMED30023992	-0.105742	0.379271	0.388282	0.959177	0.183984	0.490692	0.342911	0.40554	-0.105742		0	0	0	0	0	0	0	0	0.814759	0.367057	0.352109	0.0137009	0.674969	0.236463	0.422244	0.331561	0.970761	0.712263	0.661433	0.156334	0.902572	0.644413	0.779565	0.752309	SMED30023992	uniq_smed008134	033226_uniq	481	smed008134	0	1	.	0	.	.	.	.	.	.
SMED30029691	-0.0629782	0.0230162	-0.126747	0.0175637	-0.135471	0.0518613	-0.171625	-0.0136518	-0.0629782		0	0	0	0	0	0	0	0	0.759013	0.909525	0.539106	0.931484	0.522385	0.797412	0.419041	0.946238	0.960663	0.973848	0.796835	0.982986	0.831744	0.94876	0.777313	0.987173	SMED30029691	uniq_sm_rc_683662	033226_uniq	744	sm_rc_683662	0	.	.	.	.	.	.	.	.	.
SMED30023046	-0.816842	-0.351141	-0.740029	-0.553715	-0.265647	-0.694025	-0.137511	-0.245349	-0.816842		0	0	0	0	0	0	0	0	0.13086	0.49125	0.164996	0.293812	0.603316	0.193453	0.783923	0.624358	0.622448	0.793364	0.460871	0.713474	0.870401	0.594386	0.93953	0.892535	SMED30023046	SxlWT_comp62907_c0_seq1	SxlWT	838	NA	NA	1	.	0	.	.	.	.	.	.
SMED30002537	0.0361734	0.0454919	0.0938794	-0.00871735	-0.106823	-0.0323166	-0.0495154	-0.0694778	0.0361734		0	0	0	0	0	0	0	0	0.495573	0.391451	0.0767361	0.869681	0.0447572	0.54299	0.351699	0.190965	0.877541	0.731422	0.303943	0.969581	0.293374	0.852284	0.739639	0.627073	SMED30002537	AsxlWT_comp51047_c0_seq1	AsxlWT	715	SMEDS2F2_0001081	1	1	.	0	Q9Y2T7	2e-14	Y-box-binding protein 2	AFJ24764.1	3e-32	Y box protein-1, partial [Schmidtea mediterranea]
SMED30007714	0.0703934	0.109274	0.159836	0.113614	0.0861009	0.0901546	0.131616	0.0502307	0.0703934		0	0	0	0	0	0	0	0	0.221311	0.0572233	0.00516226	0.0485873	0.137081	0.117312	0.022357	0.382838	0.719511	0.305949	0.0557213	0.324778	0.494925	0.490581	0.211862	0.785176	SMED30007714	AsxlWT_comp47144_c0_seq1	AsxlWT	1815	SMEDS2F2_0000256	14	1	.	0	Q99759	3e-47	Mitogen-activated protein kinase kinase kinase 3	XP_001633473.1	3e-52	predicted protein [Nematostella vectensis]
SMED30031306	0.66994	-0.0402228	0.521083	0.330834	0.449772	0.511219	0.689424	0.584213	0.66994		0	0	0	0	0	0	0	0	0.120606	0.93438	0.236721	0.473627	0.32416	0.25099	0.113891	0.180139	0.607326	0.981911	0.550302	0.833092	0.705649	0.660291	0.468034	0.615885	SMED30031306	uniq_sm_482950	033226_uniq	466	sm_482950	0	.	.	.	.	.	.	.	.	.
SMED30010485	0.639987	-0.938845	0.610433	0.478852	0.280962	1.00228	0.506367	1.09819	0.639987		0	0	0	0	0	0	0	0	0.404378	0.340481	0.426111	0.546716	0.734217	0.167681	0.52428	0.121524	0.838297	0.690833	0.721841	0.864659	0.923261	0.563699	0.833925	0.533496	SMED30010485	Asxlsort_comp65092_c0_seq1	Asxlsort	632	NA	NA	1	.	0	.	.	.	.	.	.
SMED30022327	-0.102487	-0.151601	-0.0952717	-0.0369005	-0.0065383	-0.0581252	-0.0681039	-0.0281859	-0.102487		0	0	0	0	0	0	0	0	0.098174	0.0148133	0.123223	0.551209	0.916087	0.347513	0.273292	0.647147	0.572177	0.145646	0.395092	0.865873	0.97888	0.739503	0.671367	0.902103	SMED30022327	Sxlembryo_comp99885_c0_seq1	Sxlembryo	3751	SMEDS2F2_0000562	1	1	.	0	.	.	.	.	.	.
SMED30026144	0.0908808	0.102003	0.137619	-0.307352	0.0670303	0.0183088	-0.0694985	0.100976	0.0908808		0	0	0	0	0	0	0	0	0.617924	0.575665	0.445085	0.113344	0.71747	0.920996	0.712207	0.577719	0.915676	0.838103	0.736891	0.489207	0.917107	0.983528	0.916372	0.88007	SMED30026144	Sxlembryo_comp98925_c0_seq1	Sxlembryo	677	SMEDS2F2_0000370	0	1	.	0	.	.	.	CDJ11987.1	6e-05	tonsoku protein [Hymenolepis microstoma]
SMED30017274	-0.260789	-0.524866	-0.323458	-0.243598	-0.437249	-0.40279	0.0463101	0.137417	-0.260789		0	0	0	0	0	0	0	0	0.343536	0.0692069	0.242394	0.379342	0.130917	0.155382	0.861142	0.590559	0.803468	0.336191	0.5557	0.779557	0.486077	0.549173	0.966002	0.884035	SMED30017274	OX_Smed_1.0.18842	Oxford	697	NA	NA	.	.	.	.	.	.	.	.	.
SMED30024109	0.00896448	0.0522622	0.0483911	0.0656433	0.213439	0.141224	0.0514895	0.0531634	0.00896448		0	0	0	0	0	0	0	0	0.906746	0.493517	0.524601	0.391082	0.00492768	0.0624902	0.502655	0.48476	0.984266	0.794542	0.786784	0.784612	0.0852645	0.37671	0.824338	0.836157	SMED30024109	AsxlX1_comp80717_c0_seq3	AsxlX1	2419	SMEDS2F2_0003486	1	1	YES	1	Q6ZN16	2e-25	Mitogen-activated protein kinase kinase kinase 15	XP_001423551.1	3e-29	hypothetical protein [Paramecium tetraurelia strain d4-2]
SMED30022490	0.0273638	-0.0255809	-0.0394252	-0.124602	-0.0233297	0.121541	-0.120882	-0.0617314	0.0273638		0	0	0	0	0	0	0	0	0.763339	0.779556	0.665332	0.178448	0.800202	0.178498	0.192496	0.499451	0.962447	0.929024	0.865602	0.594187	0.943736	0.577757	0.588332	0.843593	SMED30022490	Sxlembryo_comp88768_c0_seq2	Sxlembryo	1583	SMEDS2F2_0003143	1	1	.	0	Q8AVL0	1e-97	CWF19-like protein 1	CAX73024.1	3e-109	cGMP-gated cation channel alpha 1 (CNG channel alpha 1) [Schistosoma japonicum]
SMED30034782	-0.113082	0.00937754	0.0275486	-0.103817	-0.0768371	-0.108694	-0.101889	-0.155678	-0.113082		0	0	0	0	0	0	0	0	0.244936	0.922228	0.772866	0.288174	0.433234	0.264681	0.298641	0.110017	0.741014	0.97695	0.917156	0.709589	0.779606	0.672125	0.693762	0.514169	SMED30034782	AsxlX1_comp78527_c0_seq18	AsxlX1	2692	FJ588625	0	2	.	0	Q8JH47	2e-41	Cyclin-dependent kinase 8	CCD81150.1	2e-54	serine/threonine kinase [Schistosoma mansoni]
SMED30024612	0.342438	0.0958014	-0.185068	-0.200395	0.512617	0.26342	0.322161	0.750018	0.342438		0	0	0	0	0	0	0	0	0.390829	0.813192	0.655278	0.631425	0.195813	0.51209	0.422835	0.0533986	0.83367	0.940086	0.860593	0.896343	0.576254	0.836696	0.780156	0.374376	SMED30024612	uniq_sm_rc_549935	033226_uniq	440	sm_rc_549935	0	.	.	.	.	.	.	.	.	.
SMED30023713	-0.103125	-0.11642	-0.166459	-0.0682916	-0.207948	-0.100206	-0.0789671	-0.0412593	-0.103125		0	0	0	0	0	0	0	0	0.177939	0.128923	0.0300256	0.373048	0.00743184	0.191119	0.304134	0.587855	0.678946	0.455227	0.176363	0.775372	0.108359	0.591741	0.698096	0.882988	SMED30023713	AsxlX1_comp84679_c0_seq2	AsxlX1	10036	AAA.454ESTABI.13	0	2	.	0	Q9NU22	5e-107	Midasin	CDJ13096.1	3e-132	midasin [Hymenolepis microstoma]
SMED30032707	-0.0999659	-0.82434	-0.243323	-0.60428	-1.19721	-0.322671	-0.755724	-0.523717	-0.0999659		0	0	0	0	0	0	0	0	0.876758	0.243759	0.709555	0.38248	0.112534	0.627366	0.286342	0.438931	0.979448	0.602792	0.889343	0.781194	0.45287	0.888036	0.682569	0.817088	SMED30032707	SxlWT_comp105133_c0_seq1	SxlWT	1608	SMEDS2F2_0000880	0	1	.	0	P36221	0	Tubulin beta-1 chain	EFX69673.1	0	hypothetical protein DAPPUDRAFT_300845 [Daphnia pulex]
SMED30005761	0.1284	0.259662	0.0313953	-0.270326	-0.0839597	0.404763	0.206655	-0.0579118	0.1284		0	0	0	0	0	0	0	0	0.599253	0.277574	0.8989	0.306904	0.74521	0.083279	0.398049	0.81763	0.91018	0.636083	0.964592	0.72286	0.926856	0.426428	0.764495	0.958056	SMED30005761	uniq_sm_528819	033226_uniq	447	sm_528819	0	.	.	.	.	.	.	.	.	.
SMED30008700	-0.260232	-0.318448	-0.538106	-0.303896	0.0929876	0.0757963	-0.115154	0.403811	-0.260232	9	0	0	-1	0	0	0	0	0	0.0935075	0.041223	0.000692455	0.0522554	0.54021	0.616185	0.455528	0.0060786	0.562963	0.258254	0.0133822	0.334218	0.841994	0.882908	0.803039	0.117904	SMED30008700	Asxlregen_comp64205_c1_seq1	Asxlregen	1566	rc_smed28676	1	1	.	0	P04323	4e-25	Retrovirus-related Pol polyprotein from transposon 17.6	EIE90449.1	3e-32	hypothetical protein RO3G_15160 [Rhizopus delemar RA 99-880]
SMED30011873	-0.0808111	-0.055753	0.0106653	-0.0158463	-0.104033	-0.107221	-0.00194941	-0.00720626	-0.0808111		0	0	0	0	0	0	0	0	0.27156	0.447847	0.884205	0.829251	0.158721	0.145199	0.978837	0.921672	0.75968	0.762961	0.958816	0.958715	0.525147	0.534654	0.994775	0.982631	SMED30011873	AsxlWT_comp56366_c0_seq27	AsxlWT	3531	smed000750	6	1	.	0	Q91W89	0	Alpha-mannosidase 2C1	EKC33973.1	0	Alpha-mannosidase 2C1 [Crassostrea gigas]
SMED30021837	-0.184346	-0.0659694	-0.153769	-0.068905	-0.165847	0.0449266	-0.0177505	0.0262673	-0.184346		0	0	0	0	0	0	0	0	0.0600467	0.499071	0.115856	0.481136	0.0917167	0.644167	0.855819	0.787034	0.494144	0.797966	0.38217	0.837376	0.411328	0.894649	0.964113	0.949584	SMED30021837	Sxlembryo_comp102301_c0_seq4	Sxlembryo	2730	rc_smed013739	1	2	.	0	Q96DM1	5e-28	PiggyBac transposable element-derived protein 4	XP_005997470.1	4e-114	piggyBac transposable element-derived protein 4-like [Latimeria chalumnae]
SMED30000282	-0.219257	-0.0512625	0.0823379	-0.0727337	-0.183622	-0.178901	-0.116796	-0.137592	-0.219257		0	0	0	0	0	0	0	0	0.0014369	0.453444	0.225813	0.288652	0.00777508	0.00925242	0.0892122	0.0446364	0.0746316	0.76636	0.536325	0.709654	0.111045	0.140213	0.418343	0.343813	SMED30000282	Sxlembryo_comp94001_c0_seq1	Sxlembryo	875	sm_41730	21	1	.	4	.	.	.	AHD24744.1	2e-11	X1.A.G7.1, partial [Schmidtea mediterranea]
SMED30001139	-0.12876	-0.124576	0.0712321	-0.0891365	-0.170156	-0.0751527	-0.0806125	-0.156967	-0.12876		0	0	0	0	0	0	0	0	0.226796	0.242509	0.491242	0.403871	0.117454	0.478846	0.451282	0.140751	0.722997	0.601386	0.764047	0.791162	0.462074	0.816786	0.799996	0.561013	SMED30001139	AsxlWT_comp58228_c0_seq1	AsxlWT	1727	sm_rc_467598	2	1	YES	2	.	.	.	.	.	.
SMED30030718	-0.523336	-0.441805	-0.208641	-0.548411	-0.837696	-0.239708	-0.7632	-0.332922	-0.523336		0	0	0	0	0	0	0	0	0.100642	0.161685	0.491983	0.0890634	0.0135381	0.435538	0.0224389	0.280803	0.576707	0.503836	0.764444	0.437078	0.155184	0.792697	0.212303	0.712776	SMED30030718	uniq_smed27428	033226_uniq	497	smed27428	0	.	.	.	.	.	.	.	.	.
SMED30034500	0.62043	0.544667	0.53876	0.277571	0.148826	-0.0435918	0.42873	0.411519	0.62043	2	1	1	1	0	0	0	0	0	0.00245664	0.00794879	0.00860716	0.179482	0.474205	0.834407	0.0374635	0.0452878	0.106885	0.0993467	0.0780909	0.595582	0.807997	0.960054	0.276805	0.347187	SMED30034500	AsxlWT_comp59531_c0_seq1	AsxlWT	1636	smed28757	3	1	.	0	Q9WUF2	1e-31	Early growth response protein 4	AFJ24725.1	5e-135	early growth response-2, partial [Schmidtea mediterranea]
SMED30033078	-0.0674531	0.229244	-0.144177	0.085596	0.137715	-0.155262	0.117143	0.414396	-0.0674531		0	0	0	0	0	0	0	0	0.780182	0.325903	0.553045	0.720023	0.564371	0.526493	0.623661	0.06867	0.96505	0.680598	0.807074	0.928195	0.853933	0.844134	0.881916	0.422053	SMED30033078	dd_smedV4_13609_0_2	Dresden	689	NA	NA	1	.	0	Q9HCI6	3e-13	Uncharacterized protein KIAA1586 [Homo sapiens]	XP_518916.3	1e-11	uncharacterized protein KIAA1586 homolog, partial [Pan troglodytes]
SMED30001645	-0.266544	-0.365901	-0.337887	-0.293937	-0.305316	-0.306436	-0.304548	-0.243958	-0.266544		0	0	0	0	0	0	0	0	0.00041524	1.40443e-06	7.92922e-06	0.00010505	5.83226e-05	5.15834e-05	5.95958e-05	0.00121341	0.0336917	0.000115831	0.000399401	0.00369722	0.00450103	0.0041406	0.00426713	0.0414895	SMED30001645	AsxlWT_comp52778_c1_seq1	AsxlWT	2877	SMEDS2F2_0000532	0	1	.	0	Q8NF64	2e-19	Zinc finger MIZ domain-containing protein 2	XP_005460145.1	1e-18	zinc finger MIZ domain-containing protein 2-like isoform X3 [Oreochromis niloticus]
SMED30012283	-0.578046	-0.170337	-0.14196	-0.400187	-0.119953	-0.192359	0.415785	-0.0408651	-0.578046		0	0	0	0	0	0	0	0	0.103387	0.611763	0.669237	0.251189	0.722526	0.568439	0.184487	0.900808	0.580795	0.855387	0.867245	0.673292	0.919039	0.863104	0.579036	0.976942	SMED30012283	Sxlembryo_comp82766_c0_seq2	Sxlembryo	1665	smed26380	0	1	.	1	Q90669	3e-70	Activin receptor type-2A	ELT91872.1	1e-72	hypothetical protein CAPTEDRAFT_94926 [Capitella teleta]
SMED30017586	-0.0476278	0.0917147	-0.562689	-0.935898	0.0450887	0.33654	-0.908908	0.741657	-0.0476278		0	0	0	0	0	0	0	0	0.935535	0.873499	0.378011	0.175385	0.939126	0.543506	0.188887	0.147833	0.989415	0.961043	0.684618	0.59052	0.986175	0.852438	0.58402	0.571109	SMED30017586	Sxlregen_comp69345_c0_seq1	Sxlregen	951	NA	NA	2	.	0	.	.	.	.	.	.
SMED30034901	0.0320762	0.0321703	-0.0712087	-0.0259681	-0.103832	0.00248613	-0.0709294	-0.0588791	0.0320762		0	0	0	0	0	0	0	0	0.718229	0.717688	0.426143	0.772501	0.253536	0.977791	0.432884	0.510488	0.950794	0.906272	0.721841	0.943616	0.63699	0.995134	0.7877	0.850144	SMED30034901	AsxlX1_comp81061_c0_seq2	AsxlX1	2696	smed015486	9	1	.	0	Q9W3C1	7e-51	Polycomb protein l(1)G0020	EYC29236.1	6e-54	hypothetical protein Y032_0006g2859 [Ancylostoma ceylanicum]
SMED30031619	-1.62472	-0.181001	0.185146	-0.69836	0.193406	-0.0235144	-0.902229	0.183496	-1.62472		0	0	0	0	0	0	0	0	0.0488553	0.787495	0.771786	0.336525	0.76642	0.971417	0.230763	0.773677	0.460787	0.932778	0.916281	0.750525	0.934242	0.994099	0.631001	0.945991	SMED30031619	AsxlX1_comp64809_c0_seq1	AsxlX1	1103	NA	NA	3	.	0	.	.	.	EYB87952.1	2e-46	hypothetical protein Y032_0254g286 [Ancylostoma ceylanicum]
SMED30011438	0.0192591	0.00213652	0.10941	0.113864	0.0643829	0.0934037	0.0986871	0.0498129	0.0192591		0	0	0	0	0	0	0	0	0.805621	0.978291	0.157263	0.1441	0.41359	0.230346	0.207419	0.522261	0.969397	0.994295	0.449951	0.543768	0.76796	0.636585	0.606019	0.856679	SMED30011438	AsxlWT_comp57159_c0_seq1	AsxlWT	1456	SMEDS2F2_0000652	11	1	.	0	Q9UJT9	5e-13	F-box/LRR-repeat protein 7	GAA53242.1	2e-69	uncharacterized F-box/LRR-repeat protein C02F5.7 [Clonorchis sinensis]
SMED30013893	0.0255101	0.115126	0.0990728	0.0375422	0.0778678	0.103024	0.0884336	0.0584758	0.0255101		0	0	0	0	0	0	0	0	0.599842	0.0177833	0.0412976	0.440408	0.109674	0.0339749	0.0690373	0.228807	0.910393	0.161976	0.214981	0.813831	0.447574	0.278273	0.370867	0.669677	SMED30013893	AsxlWT_comp41611_c0_seq2	AsxlWT	2493	SMEDS2F2_0000866	3	1	.	8	Q9D8V0	2e-87	Minor histocompatibility antigen H13	XP_003229591.2	1e-123	minor histocompatibility antigen H13 [Anolis carolinensis]
SMED30007340	-0.19245	-0.410634	0.169059	0.567502	0.137151	-0.409731	0.0873895	-0.222778	-0.19245		0	0	0	0	0	0	0	0	0.813567	0.624756	0.827561	0.450062	0.864711	0.626242	0.91228	0.784909	0.970761	0.861821	0.938791	0.818998	0.96515	0.887356	0.979183	0.949482	SMED30007340	SxlWT_comp40142_c0_seq1	SxlWT	519	smed022508	0	1	YES	0	.	.	.	.	.	.
SMED30011021	-0.343909	-0.30038	0.053033	0.235406	0.355241	-0.218694	0.0524881	-0.337067	-0.343909		0	0	0	0	0	0	0	0	0.236784	0.298549	0.844036	0.374318	0.174669	0.443828	0.848733	0.243087	0.733592	0.656701	0.944147	0.776273	0.547993	0.797865	0.960461	0.682802	SMED30011021	berlin_isotig04653	Berlin	476	isotig04653	0	.	.	.	.	.	.	.	.	.
SMED30001423	0.0372722	0.913886	-1.7533	0.0854449	-0.264144	-0.56979	0.420668	-0.904913	0.0372722		0	0	0	0	0	0	0	0	0.956145	0.125378	0.0499999	0.900226	0.716592	0.448836	0.517955	0.249094	0.994146	0.449965	0.240907	0.974827	0.916743	0.801529	0.832762	0.687638	SMED30001423	uniq_sm_rc_537442	033226_uniq	318	sm_rc_537442	0	.	.	.	.	.	.	.	.	.
SMED30018318	0.204659	0.347022	-0.753416	0.504829	-0.191483	-0.70515	-0.41374	0.543478	0.204659		0	0	0	0	0	0	0	0	0.75247	0.585726	0.312069	0.419838	0.784398	0.345346	0.566488	0.37704	0.958706	0.841625	0.624992	0.801472	0.9385	0.738488	0.854643	0.783421	SMED30018318	Sxlregen_comp131837_c0_seq1	Sxlregen	1111	NA	NA	1	.	0	Q96DM1	2e-12	PiggyBac transposable element-derived protein 4	EFN81986.1	3e-18	PiggyBac transposable element-derived protein 4 [Harpegnathos saltator]
SMED30029962	-0.165415	-0.183249	0.026759	-0.23827	-0.371277	-0.257087	-0.167416	-0.115646	-0.165415		0	0	0	0	0	0	0	0	0.0636061	0.0404107	0.759358	0.00833155	5.44201e-05	0.004353	0.0625711	0.191709	0.503035	0.255297	0.911378	0.112515	0.00426565	0.0891414	0.354764	0.627939	SMED30029962	Asxlsort_comp77743_c1_seq18	Asxlsort	542	AAA.454ESTABI.75	4	1	.	1	.	.	.	.	.	.
SMED30033954	0.346116	0.448556	0.214124	-0.05887	-0.479924	0.232319	0.13793	0.251374	0.346116		0	0	0	0	0	0	0	0	0.266252	0.143018	0.499083	0.861438	0.190558	0.466278	0.673747	0.424715	0.754349	0.476459	0.769068	0.967083	0.569658	0.810358	0.90346	0.807497	SMED30033954	uniq_smed26618	033226_uniq	567	sm_423907	0	.	.	.	.	.	.	.	.	.
SMED30026553	-0.0777987	0.0256691	0.102245	-0.0171737	0.00364343	-0.145617	0.0463094	-0.0547951	-0.0777987		0	0	0	0	0	0	0	0	0.212652	0.677577	0.0931052	0.783133	0.953579	0.0210417	0.455877	0.37716	0.710996	0.887491	0.338678	0.945485	0.988857	0.219066	0.803163	0.78344	SMED30026553	Sxlembryo_comp97578_c0_seq28	Sxlembryo	1682	JP_CaspaseXA	0	2	.	0	O02002	3e-26	Caspase-1	XP_005951292.1	5e-30	caspase-8-like isoform X1 [Haplochromis burtoni]
SMED30006202	-0.187546	-0.0378668	-0.120543	-0.178566	-0.12912	-0.156273	-0.0516533	-0.0237465	-0.187546		0	0	0	0	0	0	0	0	0.107816	0.741489	0.295925	0.12765	0.270903	0.179795	0.655856	0.835318	0.588648	0.916081	0.608491	0.518251	0.65371	0.578886	0.8967	0.96204	SMED30006202	dd_smedV4_15845_0_2	Dresden	1651	NA	NA	4	.	0	.	.	.	.	.	.
SMED30030720	-0.058882	0.117247	0.0271814	0.0785112	0.0337611	0.118094	0.0494505	0.0959288	-0.058882		0	0	0	0	0	0	0	0	0.424689	0.105194	0.708707	0.282636	0.647705	0.103165	0.501269	0.184234	0.849555	0.413177	0.889283	0.704793	0.891887	0.465581	0.824338	0.619934	SMED30030720	AsxlWT_comp57952_c0_seq2	AsxlWT	1607	SMEDS2F2_0000037	9	1	.	0	Q4KLT3	4e-89	Probable tRNA (uracil-O(2)-)-methyltransferase	GAA29832.2	7e-116	probable tRNA (uracil-O(2)-)-methyltransferase [Clonorchis sinensis]
SMED30035199	-0.174622	-0.0455604	0.0731963	-0.0632372	0.0769896	0.0803657	0.0426034	-0.1298	-0.174622		0	0	0	0	0	0	0	0	0.027705	0.561142	0.342943	0.422747	0.325057	0.299896	0.586132	0.0994304	0.359745	0.832396	0.653599	0.80342	0.706527	0.702428	0.864834	0.493741	SMED30035199	AsxlWT_comp17388_c0_seq1	AsxlWT	747	sm_rc_30956	3	1	YES	2	.	.	.	ELU02408.1	1e-05	hypothetical protein CAPTEDRAFT_208831 [Capitella teleta]
SMED30011354	-0.419737	-0.0658734	-0.0824027	-0.483804	-0.452175	-0.638264	-0.447586	-0.259323	-0.419737	7	0	0	0	0	0	-1	0	0	0.0108939	0.682719	0.608784	0.00361444	0.00651728	0.000142598	0.00704868	0.111402	0.237505	0.889541	0.840208	0.0633076	0.100729	0.00908901	0.108184	0.515895	SMED30011354	OX_Smed_1.0.08970	Oxford	591	NA	NA	1	.	0	.	.	.	.	.	.
SMED30017457	0.430648	-0.454412	0.785912	0.867561	-0.871413	0.841386	0.506846	0.170973	0.430648		0	0	0	0	0	0	0	0	0.602441	0.629655	0.314862	0.268148	0.392365	0.282512	0.540987	0.842024	0.910413	0.864332	0.627738	0.690518	0.75164	0.687549	0.843074	0.962995	SMED30017457	AsxlX1_comp59380_c0_seq2	AsxlX1	532	NA	NA	1	.	0	.	.	.	.	.	.
SMED30008658	-0.0288461	-0.1086	0.0489707	-0.182417	-0.264013	-0.231513	-0.0407888	0.00355965	-0.0288461		0	0	0	0	0	0	0	0	0.854995	0.495672	0.753628	0.258996	0.107371	0.152568	0.798067	0.981963	0.977598	0.795589	0.908922	0.68065	0.443093	0.544612	0.945455	0.996838	SMED30008658	OX_Smed_1.0.08704	Oxford	744	smed26126	0	.	.	.	.	.	.	.	.	.
SMED30012942	0.186939	-0.0271503	-0.121328	-0.00404074	0.147939	-0.00583105	-0.110047	-0.11716	0.186939		0	0	0	0	0	0	0	0	0.0107345	0.71611	0.10578	0.956935	0.046239	0.937703	0.146104	0.118466	0.236632	0.905517	0.362904	0.990852	0.298709	0.986259	0.524288	0.528527	SMED30012942	AsxlWT_comp44573_c0_seq1	AsxlWT	1648	SMEDS2F2_0000915	0	1	.	7	P79222	1e-53	Calcitonin receptor	ELT89684.1	8e-71	hypothetical protein CAPTEDRAFT_221530 [Capitella teleta]
SMED30008238	-0.15137	-0.291514	-0.232421	-0.194572	-0.13803	-0.154423	-0.331137	-0.19593	-0.15137		0	0	0	0	0	0	0	0	0.194518	0.0142286	0.0476478	0.0994686	0.242334	0.187117	0.00606489	0.0939591	0.692737	0.142319	0.234916	0.460967	0.625684	0.587291	0.0986317	0.482079	SMED30008238	dd_smedV4_14875_0_2	Dresden	2686	sm_rc_307394	0	4	.	0	.	.	.	CAP20865.2	3e-48	Protein CBG24201 [Caenorhabditis briggsae]
SMED30035853	0.0312596	0.0322535	0.176172	-0.0119047	0.0646288	-0.00453185	0.053648	0.0589852	0.0312596		0	0	0	0	0	0	0	0	0.73122	0.723398	0.0485178	0.897041	0.481256	0.960546	0.5581	0.5145	0.954103	0.907956	0.236743	0.973716	0.812018	0.99128	0.849845	0.852466	SMED30035853	AsxlWT_comp54363_c0_seq3	AsxlWT	1645	SMEDS2F2_0000991	7	1	.	0	P69341	4e-49	Poly(A)-specific ribonuclease PARN	XP_006105281.1	1e-48	poly(A)-specific ribonuclease PARN [Myotis lucifugus]
SMED30023936	0.677802	0.617264	0.0788692	0.508818	0.203441	0.630907	1.00126	0.433083	0.677802		0	0	0	0	0	0	0	0	0.148833	0.193863	0.878808	0.296652	0.694798	0.184231	0.0260751	0.374023	0.647207	0.546514	0.956975	0.713837	0.908176	0.583186	0.228755	0.781061	SMED30023936	Sxlregen_comp14441_c1_seq2	Sxlregen	2786	NA	NA	1	.	0	P09446	6e-13	Heat shock 70 kDa protein A [Caenorhabditis elegans]	GAA29976.2	5e-20	hypoxia up-regulated 1, partial [Clonorchis sinensis]
SMED30014742	-0.189463	-0.232196	-0.24271	-0.0531795	-0.159008	-0.202484	-0.146785	-0.0728872	-0.189463		0	0	0	0	0	0	0	0	0.179482	0.102658	0.0864327	0.702664	0.265477	0.153764	0.301471	0.597301	0.680202	0.407636	0.325127	0.922762	0.647706	0.546587	0.696216	0.886266	SMED30014742	Sxlembryo_comp97939_c0_seq3	Sxlembryo	3277	SMEDS2F2_0002096	0	1	.	6	Q13507	4e-154	Short transient receptor potential channel 3	GAA51153.1	0	short transient receptor potential channel 3, partial [Clonorchis sinensis]
SMED30027535	-0.1516	-0.256412	-0.307779	-0.131372	-0.23588	-0.357129	-0.0179461	-0.212317	-0.1516		0	0	0	0	0	0	0	0	0.246574	0.0527628	0.0201921	0.317324	0.0770122	0.00768828	0.890356	0.105962	0.743137	0.293822	0.137801	0.732321	0.37679	0.126195	0.973288	0.507692	SMED30027535	OX_Smed_1.0.12880	Oxford	909	SMEDS2F2_0001706	0	.	.	.	.	.	.	.	.	.
SMED30003215	0.58936	-0.291699	-0.241647	-0.155524	0.809841	0.039014	-0.128883	-0.923998	0.58936		0	0	0	0	0	0	0	0	0.145791	0.511576	0.582225	0.723569	0.0443818	0.927529	0.76941	0.0523069	0.643648	0.805687	0.826821	0.929211	0.292552	0.984678	0.934335	0.370648	SMED30003215	OX_Smed_1.0.14100	Oxford	897	smed28348	2	.	.	.	.	.	.	.	.	.
SMED30020345	-0.674628	-0.0544587	0.774791	0.909566	0.0272243	-0.145839	0.646487	0.180509	-0.674628		0	0	0	0	0	0	0	0	0.23432	0.915325	0.0814394	0.039106	0.957657	0.779858	0.161978	0.712774	0.730891	0.975328	0.314074	0.288381	0.989492	0.943086	0.545762	0.927492	SMED30020345	berlin_CUFF.35065.1	Berlin	336	NA	NA	.	.	.	.	.	.	.	.	.
SMED30003781	0.060323	0.219485	0.0809921	0.10911	-0.0418397	0.0558777	0.0845598	0.340906	0.060323		0	0	0	0	0	0	0	0	0.82292	0.403245	0.761672	0.685804	0.880994	0.83657	0.756205	0.182008	0.971496	0.740216	0.91282	0.915655	0.969406	0.960289	0.930332	0.617398	SMED30003781	Sxlregen_comp27745_c1_seq3	Sxlregen	1134	sm_523957	5	1	.	0	.	.	.	.	.	.
SMED30017056	0.0369116	0.353868	0.179821	-0.307626	-0.0351756	-0.0509131	0.00496027	0.338326	0.0369116		0	0	0	0	0	0	0	0	0.890254	0.162588	0.488154	0.283595	0.898561	0.851948	0.985506	0.180164	0.981599	0.505262	0.762374	0.705105	0.975121	0.964354	0.996459	0.615885	SMED30017056	Asxlsort_comp74849_c0_seq1	Asxlsort	1210	SMEDS2F2_0000819	2	1	.	0	Q8N328	3e-14	PiggyBac transposable element-derived protein 3 [Homo sapiens]	XP_008212369.1	2e-41	piggyBac transposable element-derived protein 4-like [Nasonia vitripennis]
SMED30017805	0.82061	0.489905	1.05338	1.66923	0.835327	0.570091	0.867251	0.928195	0.82061	5	1	0	1	1	1	0	1	1	0.0020605	0.0663046	7.70034e-05	5.0928e-10	0.00174939	0.032553	0.00114304	0.000490834	0.0959043	0.327929	0.002532	7.76096e-08	0.0447728	0.272885	0.0334782	0.0221547	SMED30017805	AsxlWT_comp60610_c0_seq10	AsxlWT	2050	SMEDS2F2_0001291	0	2	.	0	Q9BTX7	4e-24	Alpha-tocopherol transfer protein-like [Homo sapiens]	CAD38263.1	3e-59	hypothetical protein [Taenia solium]
SMED30015350	0.0549127	0.117128	-0.0339381	0.101481	0.186318	0.146336	0.111549	0.101932	0.0549127		0	0	0	0	0	0	0	0	0.625071	0.29355	0.764465	0.367039	0.0958922	0.188506	0.322635	0.359284	0.916809	0.6519	0.913374	0.772278	0.421861	0.588759	0.71503	0.771656	SMED30015350	AsxlX1_comp84358_c0_seq10	AsxlX1	2433	NA	NA	1	.	0	.	.	.	EFX81466.1	3e-30	hypothetical protein DAPPUDRAFT_317650 [Daphnia pulex]
SMED30028378	-0.045497	0.751152	-0.0742914	-0.000706587	0.285496	0.216243	0.656959	-0.360516	-0.045497		0	0	0	0	0	0	0	0	0.954387	0.283105	0.925494	0.99929	0.709912	0.77761	0.361196	0.664794	0.993552	0.641161	0.974891	0.99987	0.914556	0.942236	0.743528	0.90908	SMED30028378	Sxlregen_comp133138_c0_seq1	Sxlregen	427	NA	NA	1	.	0	O93209	0.0007	Pro-Pol polyprotein	EGT36988.1	9e-09	hypothetical protein CAEBREN_09040, partial [Caenorhabditis brenneri]
SMED30010535	-0.176971	-0.114491	-0.116331	0.0739414	-0.112252	-0.172051	0.0198844	-0.0268949	-0.176971		0	0	0	0	0	0	0	0	0.396377	0.581573	0.574249	0.718788	0.591614	0.410262	0.923328	0.896002	0.835896	0.839549	0.822454	0.927972	0.866006	0.781204	0.981254	0.97631	SMED30010535	Sxlembryo_comp94713_c0_seq1	Sxlembryo	446	SMEDS2F2_0002496	9	1	.	0	.	.	.	.	.	.
SMED30001050	-0.137827	-0.191607	-0.0248148	0.439177	0.0750765	0.134683	0.138602	-0.0218392	-0.137827		0	0	0	0	0	0	0	0	0.620145	0.495562	0.927047	0.0832064	0.783153	0.612873	0.606115	0.935778	0.916453	0.795589	0.975213	0.424892	0.9385	0.881125	0.874405	0.985581	SMED30001050	dd_smedV4_22580_0_6	Dresden	322	NA	NA	1	.	0	.	.	.	ESO85872.1	0.0004	hypothetical protein LOTGIDRAFT_167623 [Lottia gigantea]
SMED30003471	-0.278388	-0.0262829	0.0895883	0.0291841	-0.311438	-0.465326	-0.0330025	-0.155778	-0.278388		0	0	0	0	0	0	0	0	0.180572	0.895029	0.643803	0.883273	0.143908	0.0310628	0.870282	0.441463	0.681625	0.967544	0.853525	0.973198	0.503763	0.265	0.967785	0.818475	SMED30003471	OX_Smed_1.0.00633	Oxford	551	sm_686260	16	.	.	.	.	.	.	.	.	.
SMED30017196	0.0858721	0.126338	0.0243779	0.0345558	-0.00652786	0.189899	0.114919	0.0761838	0.0858721		0	0	0	0	0	0	0	0	0.385938	0.199808	0.806447	0.731573	0.949108	0.052049	0.250003	0.440356	0.830055	0.552903	0.930237	0.931249	0.987837	0.34448	0.651392	0.817867	SMED30017196	AsxlWT_comp53214_c0_seq2	AsxlWT	1062	EF633690	1	1	YES	0	P49011	2e-20	Noggin	ABV04323.1	0	noggin 1 [Schmidtea mediterranea]
SMED30015937	-0.995706	-0.653122	-0.595694	-0.71694	-1.52162	-0.853908	-1.05183	-1.4588	-0.995706	6	0	0	0	0	-1	0	0	-1	0.0394868	0.152607	0.184149	0.123512	0.00486845	0.0716613	0.0340809	0.00505167	0.423354	0.490997	0.48706	0.51095	0.0846298	0.400027	0.26353	0.10561	SMED30015937	uniq_SMEDS2F2_00021695-RA	033226_uniq	273	SMEDS2F2_0000457	0	.	.	.	.	.	.	.	.	.
SMED30013337	-0.129772	-0.130929	-0.00715041	-0.0993677	-0.182704	-0.261407	-0.169561	-0.118095	-0.129772		0	0	0	0	0	0	0	0	0.0328966	0.0315439	0.905482	0.103038	0.00298626	2.1275e-05	0.00570248	0.0517503	0.390815	0.222812	0.968004	0.469569	0.0626051	0.00217986	0.0945824	0.368881	SMED30013337	AsxlX1_comp74610_c0_seq2	AsxlX1	1175	SMEDS2F2_0001058	4	1	.	0	Q7ZYR8	1e-15	Arginine/serine-rich coiled-coil protein 2 [Xenopus laevis]	GAA52029.1	3e-19	arginine/serine-rich coiled-coil protein 2 [Clonorchis sinensis]
SMED30029902	-0.0626986	-0.0269549	0.0299364	0.0655254	-0.0256365	-0.182959	-0.160562	-0.0666345	-0.0626986		0	0	0	0	0	0	0	0	0.337616	0.679882	0.645704	0.315145	0.695802	0.00538395	0.0147226	0.307876	0.800979	0.888197	0.854628	0.730538	0.908176	0.101625	0.170192	0.732927	SMED30029902	AsxlWT_comp62374_c1_seq1	AsxlWT	2323	SMEDS2F2_0001518	0	1	YES	1	A6QGC0	8e-18	Serine/threonine-protein kinase PrkC	XP_001783052.1	7e-20	predicted protein [Physcomitrella patens]
SMED30024885	0.0279992	-0.0152392	-0.134613	0.310578	0.686565	0.0468246	0.223671	0.515275	0.0279992		0	0	0	0	0	0	0	0	0.932799	0.963583	0.688046	0.343856	0.0334724	0.887874	0.497719	0.110381	0.989386	0.990929	0.87758	0.754268	0.250704	0.97348	0.822364	0.514169	SMED30024885	berlin_CUFF.148986.1	Berlin	708	NA	NA	.	.	.	.	.	.	.	.	.
SMED30030417	0.701278	-0.468454	-0.618831	-0.135986	-1.25026	-1.75328	-0.205863	-0.419586	0.701278		0	0	0	0	0	0	0	0	0.159285	0.412547	0.285415	0.805471	0.0521058	0.0103149	0.712507	0.45727	0.659873	0.745505	0.598732	0.951385	0.314932	0.148714	0.916459	0.825654	SMED30030417	uniq_sm_711662	033226_uniq	424	sm_711662	0	.	.	.	.	.	.	.	.	.
SMED30026078	0.104429	0.123335	0.0402706	-0.0200317	0.364328	0.337542	0.141841	0.116637	0.104429		0	0	0	0	0	0	0	0	0.400946	0.320506	0.746676	0.874277	0.00293979	0.00556836	0.255814	0.346379	0.837604	0.67489	0.905659	0.970416	0.0619772	0.103766	0.65592	0.762248	SMED30026078	uniq_isotig25016	033226_uniq	407	isotig25016	0	.	.	.	.	.	.	.	.	.
SMED30031823	0.0153965	0.0876421	0.122253	0.041721	0.0516459	0.0214373	0.0146573	-0.0143772	0.0153965		0	0	0	0	0	0	0	0	0.783483	0.117335	0.0286682	0.456843	0.357621	0.702107	0.793986	0.797554	0.965367	0.436819	0.171478	0.823025	0.728679	0.917046	0.943114	0.953403	SMED30031823	AsxlWT_comp57631_c0_seq1	AsxlWT	1408	SMEDS2F2_0001056	1	1	.	8	Q6DED0	7e-102	Translocating chain-associated membrane protein 1-like 1	ELU13900.1	3e-126	hypothetical protein CAPTEDRAFT_175940 [Capitella teleta]
SMED30026997	0.0560126	0.0482035	0.131915	0.0464682	-0.13673	-0.0524009	-0.0413924	-0.115746	0.0560126		0	0	0	0	0	0	0	0	0.328655	0.401536	0.0199085	0.421148	0.0213246	0.367968	0.479449	0.0471192	0.79569	0.739355	0.136549	0.802315	0.197797	0.753452	0.814314	0.353583	SMED30026997	AsxlWT_comp59340_c0_seq2	AsxlWT	1543	SMEDS2F2_0000363	4	2	.	0	Q9Z265	3e-107	Serine/threonine-protein kinase Chk2	EKC37339.1	7e-132	Serine/threonine-protein kinase Chk2 [Crassostrea gigas]
SMED30024379	-0.0341764	-0.194508	-0.238597	-0.119813	0.0480094	0.00641127	-0.188578	-0.159806	-0.0341764		0	0	0	0	0	0	0	0	0.667496	0.0149005	0.0028249	0.133348	0.546488	0.935745	0.0184305	0.0450914	0.933084	0.146007	0.0365702	0.529597	0.843989	0.985653	0.192652	0.346433	SMED30024379	AsxlX1_comp74559_c0_seq2	AsxlX1	2524	smed010370	6	1	.	0	.	.	.	.	.	.
SMED30028392	0.0543527	-0.241495	-0.0909603	-0.142265	-0.0936547	-0.159972	0.234047	-0.0920721	0.0543527		0	0	0	0	0	0	0	0	0.89732	0.583302	0.831702	0.744631	0.830411	0.713684	0.572934	0.829856	0.983132	0.840592	0.940675	0.93657	0.953841	0.920181	0.858244	0.961142	SMED30028392	Sxlregen_comp96857_c0_seq1	Sxlregen	1430	smed020868	0	1	.	5	O93603	2e-05	Thyrotropin-releasing hormone receptor	ELT87805.1	2e-12	hypothetical protein CAPTEDRAFT_131203 [Capitella teleta]
SMED30025999	0.764121	-0.275513	0.423354	-0.686149	0.149915	0.354856	-0.416954	0.537176	0.764121		0	0	0	0	0	0	0	0	0.170425	0.678647	0.470904	0.339204	0.811762	0.554039	0.545885	0.351312	0.672643	0.887491	0.75288	0.751612	0.947917	0.857401	0.84438	0.76542	SMED30025999	uniq_rc_smed27884	033226_uniq	541	rc_smed27884	0	.	.	.	.	.	.	.	.	.
SMED30020433	0.0589274	0.0407959	0.102669	-0.0218586	0.117099	-0.0911471	0.0937681	-0.0260513	0.0589274		0	0	0	0	0	0	0	0	0.417256	0.575079	0.155796	0.765379	0.108162	0.214153	0.197916	0.720881	0.846713	0.838103	0.447743	0.941594	0.444447	0.618596	0.595748	0.930021	SMED30020433	OX_Smed_1.0.07187	Oxford	1400	SMEDS2F2_0001550	0	1	.	6	Q51330	2e-07	Oxalate:formate antiporter	XP_006819140.1	8e-24	uncharacterized protein LOC100370263 [Saccoglossus kowalevskii]
SMED30027989	0.414437	-0.443191	0.34901	0.504663	0.550015	0.0445306	-0.117312	0.100523	0.414437		0	0	0	0	0	0	0	0	0.280283	0.308159	0.365787	0.186611	0.150151	0.912681	0.779491	0.801934	0.765039	0.665202	0.674261	0.604316	0.513034	0.981502	0.938591	0.954519	SMED30027989	dd_smedV4_57793_0_1	Dresden	708	NA	NA	1	.	0	.	.	.	XP_002404407.1	1e-07	hypothetical protein IscW_ISCW024244 [Ixodes scapularis]
SMED30023879	-0.0744076	0.00975171	0.0427622	0.190449	0.0202209	0.229881	0.285093	-0.357422	-0.0744076		0	0	0	0	0	0	0	0	0.867623	0.982346	0.921678	0.658058	0.963945	0.58881	0.502925	0.443274	0.977989	0.995391	0.974293	0.906334	0.991293	0.86983	0.824338	0.819354	SMED30023879	Sxlembryo_comp100834_c1_seq8	Sxlembryo	600	NA	NA	1	.	0	.	.	.	.	.	.
SMED30022778	0.0383232	-0.0222848	-0.118645	-0.109651	-0.00162725	-0.0456552	-0.0797247	-0.104869	0.0383232		0	0	0	0	0	0	0	0	0.7181	0.835483	0.272871	0.316729	0.988042	0.67229	0.466655	0.331742	0.950754	0.948917	0.586485	0.732177	0.997026	0.905171	0.807285	0.752436	SMED30022778	AsxlX1_comp79656_c2_seq2	AsxlX1	2613	SMEDS2F2_0003562	0	2	.	0	Q6ZUX3	4e-06	Protein FAM179A [Homo sapiens]	XP_001620171.1	6e-07	hypothetical protein NEMVEDRAFT_v1g3739 [Nematostella vectensis]
SMED30029300	0.10245	0.292679	0.321511	0.00750626	0.276886	0.191576	0.247744	0.265753	0.10245		0	0	0	0	0	0	0	0	0.565299	0.0898823	0.0592996	0.967252	0.11542	0.276696	0.159692	0.122854	0.90488	0.384795	0.265384	0.992474	0.458884	0.682754	0.541768	0.53513	SMED30029300	uniq_sm_226011	033226_uniq	586	sm_226011	0	.	.	.	.	.	.	.	.	.
SMED30016965	0.0531575	0.113876	0.155001	-0.0323139	-0.0226061	0.0839633	0.0268174	-0.01951	0.0531575		0	0	0	0	0	0	0	0	0.457951	0.110535	0.0287942	0.655438	0.755811	0.240693	0.710358	0.786055	0.858017	0.42505	0.171889	0.906334	0.931291	0.648736	0.915645	0.94952	SMED30016965	AsxlWT_comp18740_c0_seq1	AsxlWT	830	SMEDS2F2_0000486	3	1	.	1	Q9CQ56	7e-09	Vesicle transport protein USE1	NP_001090159.1	2e-09	unconventional SNARE in the ER 1 homolog [Xenopus laevis]
SMED30001732	-1.9417	0.0144124	0.265139	0.508741	-0.750885	-0.0832399	-0.768132	0.177907	-1.9417		-1	0	0	0	0	0	0	0	0.00790616	0.978174	0.596739	0.296766	0.219261	0.876853	0.208472	0.726646	0.202444	0.994295	0.834454	0.713925	0.604028	0.970249	0.606158	0.932053	SMED30001732	AsxlX1_comp73808_c0_seq11	AsxlX1	537	NA	NA	1	.	0	.	.	.	.	.	.
SMED30033118	-0.0739737	0.0654975	0.146332	-0.0779138	-0.0215185	0.0428129	-0.0758571	-0.0378277	-0.0739737		0	0	0	0	0	0	0	0	0.398618	0.446737	0.0839907	0.377787	0.807418	0.62068	0.392271	0.663177	0.836959	0.762233	0.319846	0.778204	0.947079	0.884947	0.759815	0.908989	SMED30033118	SxlWT_comp61296_c0_seq3	SxlWT	1717	smed010268	26	1	.	0	Q8SSJ5	9e-36	Cell division control protein 48 [Encephalitozoon cuniculi GB-M1]	ETN81921.1	2e-39	ATPase, AAA family, partial [Necator americanus]
SMED30000992	0.0986507	-0.0980667	-0.304644	-0.0366682	-0.0522027	0.0746923	-0.0597323	0.20053	0.0986507		0	0	0	0	0	0	0	0	0.535539	0.552508	0.0729805	0.823683	0.753937	0.641781	0.719258	0.197459	0.892004	0.827898	0.296394	0.956507	0.930372	0.894649	0.919157	0.635702	SMED30000992	berlin_isotig19518	Berlin	388	isotig19518	0	.	.	.	.	.	.	.	.	.
SMED30013615	-0.166398	-0.40663	-0.0828911	0.236847	0.447675	0.341572	0.345323	0.388709	-0.166398	4	0	0	0	0	0	0	0	0	0.475952	0.0914114	0.718635	0.289709	0.0411714	0.12072	0.119055	0.0745185	0.869959	0.387724	0.893154	0.710313	0.280528	0.495778	0.477572	0.437833	SMED30013615	Sxlregen_comp6139_c0_seq1	Sxlregen	2239	rc_smed020744	0	4	.	2	.	.	.	XP_005172038.1	2e-07	uncharacterized protein LOC101886116 isoform X1 [Danio rerio]
SMED30020165	-0.502385	-0.491367	0.0758695	0.249996	-0.132962	0.226446	-0.280262	0.895289	-0.502385		0	0	0	0	0	0	0	0	0.403601	0.414045	0.889579	0.643298	0.818063	0.674761	0.634407	0.0652022	0.838297	0.74678	0.961527	0.900624	0.950671	0.905989	0.886511	0.411658	SMED30020165	dd_smedV4_46137_0_1	Dresden	419	NA	NA	1	.	0	.	.	.	.	.	.
SMED30020866	0.11408	-0.581677	0.419737	-0.270595	0.381223	-0.426039	-0.120344	-0.343839	0.11408		0	0	0	0	0	0	0	0	0.830321	0.327411	0.407613	0.634945	0.462983	0.463385	0.82976	0.5454	0.972977	0.6823	0.707666	0.897323	0.800325	0.808398	0.955194	0.866	SMED30020866	SxlWT_comp59894_c0_seq1	SxlWT	2755	NA	NA	2	.	0	.	.	.	.	.	.
SMED30027292	-0.13994	-0.314005	0.0402843	-0.0352558	-0.291076	-0.117822	-0.0631506	0.266548	-0.13994		0	0	0	0	0	0	0	0	0.722659	0.439325	0.915888	0.928145	0.479065	0.765152	0.872929	0.46881	0.951599	0.757551	0.972032	0.982816	0.810275	0.938402	0.96855	0.830186	SMED30027292	Sxlregen_comp9386_c0_seq3	Sxlregen	1065	NA	NA	1	.	0	.	.	.	.	.	.
SMED30022521	0.0383958	0.138282	0.238278	0.174303	0.0546037	0.0927064	0.0588252	0.11263	0.0383958		0	0	0	0	0	0	0	0	0.657244	0.107837	0.00518119	0.0428417	0.530553	0.282956	0.498405	0.190114	0.927955	0.419169	0.0557307	0.303982	0.837113	0.687763	0.82259	0.62674	SMED30022521	AsxlWT_comp60321_c0_seq1	AsxlWT	2000	SMEDS2F2_0003398	6	1	.	1	.	.	.	.	.	.
SMED30017990	0.0252994	-0.0994304	-0.214259	-0.0153886	0.11587	0.0377464	-0.0714748	-0.115403	0.0252994		0	0	0	0	0	0	0	0	0.783443	0.281357	0.0204763	0.867492	0.208439	0.681833	0.439066	0.210997	0.965367	0.640156	0.138951	0.969314	0.591798	0.909513	0.792663	0.651103	SMED30017990	AsxlWT_comp55659_c0_seq1	AsxlWT	1544	SMEDS2F2_0002412	2	1	.	0	.	.	.	.	.	.
SMED30019216	0.538123	0.736117	0.696579	1.34321	-0.1396	-0.210029	-0.337962	-0.646145	0.538123	5	0	0	0	1	0	0	0	0	0.349829	0.188133	0.212841	0.00877628	0.83033	0.746576	0.614208	0.349212	0.806269	0.539469	0.521735	0.116875	0.953791	0.931222	0.878598	0.764404	SMED30019216	Sxlembryo_comp75246_c0_seq1	Sxlembryo	536	NA	NA	1	.	0	.	.	.	.	.	.
SMED30031916	0.095446	0.128449	0.129316	0.0274642	0.0381729	0.0464261	0.0386711	-0.0510473	0.095446		0	0	0	0	0	0	0	0	0.129125	0.0411118	0.0397147	0.662553	0.544299	0.460562	0.538939	0.417329	0.617961	0.257827	0.209612	0.908253	0.843028	0.807205	0.841769	0.804177	SMED30031916	AsxlWT_comp33184_c0_seq1	AsxlWT	485	SMEDS2F2_0000598	1	1	.	0	Q9W6Y0	5e-19	40S ribosomal protein S30 [Oryzias latipes]	CDJ16838.1	4e-41	small subunit ribosomal protein s30e [Echinococcus granulosus]
SMED30006894	0.348078	-0.315216	-0.250827	-1.3325	0.145581	-0.198629	0.0426414	0.566147	0.348078	1	0	0	0	0	0	0	0	0	0.433889	0.527933	0.608847	0.0262111	0.75625	0.685699	0.928591	0.1841	0.851902	0.814534	0.840208	0.231611	0.931291	0.911297	0.981941	0.619934	SMED30006894	Asxlsort_comp52704_c0_seq1	Asxlsort	705	NA	NA	1	.	1	.	.	.	.	.	.
SMED30034532	0.0347927	0.0182687	-0.0614204	-0.0183769	0.0122275	0.0548999	0.0616927	0.0891812	0.0347927		0	0	0	0	0	0	0	0	0.557555	0.758321	0.301687	0.757751	0.837484	0.354785	0.299329	0.13183	0.902865	0.921776	0.614114	0.9404	0.95575	0.743993	0.694392	0.548474	SMED30034532	OX_Smed_1.0.03299	Oxford	2282	SMEDS2F2_0001419	0	3	YES	0	Q61830	3e-13	Macrophage mannose receptor 1	EFB13721.1	2e-18	hypothetical protein PANDA_007183 [Ailuropoda melanoleuca]
SMED30021123	0.0562152	0.169565	0.084457	0.198455	0.1132	0.15056	0.158833	0.0974586	0.0562152		0	0	0	0	0	0	0	0	0.384728	0.00844388	0.19027	0.00206447	0.0809587	0.0194959	0.0139564	0.130677	0.829582	0.10334	0.494339	0.0416004	0.386318	0.210623	0.165541	0.546952	SMED30021123	AsxlWT_comp42674_c0_seq1	AsxlWT	870	SMEDS2F2_0002027	0	1	.	2	Q58604	8e-09	Uncharacterized N-acetyltransferase MJ1207 [Methanocaldococcus jannaschii DSM 2661]	WP_018277945.1	6e-09	hypothetical protein [Teredinibacter turnerae]
SMED30004290	0.265652	0.121323	-0.204483	0.36487	0.764247	0.546852	-0.302172	0.492505	0.265652		0	0	0	0	0	0	0	0	0.507735	0.767377	0.632416	0.36001	0.0433065	0.156785	0.494464	0.202263	0.882357	0.925497	0.849244	0.765606	0.288336	0.551089	0.82049	0.642682	SMED30004290	AsxlWT_comp60229_c1_seq17	AsxlWT	567	NA	NA	1	.	0	.	.	.	.	.	.
SMED30016669	-0.123982	-0.0256592	-0.250823	-1.12552	-0.341083	0.369953	-0.0477068	-0.461846	-0.123982		0	0	0	0	0	0	0	0	0.797209	0.956933	0.60886	0.0517573	0.504003	0.405678	0.921376	0.363737	0.968568	0.989163	0.840208	0.332214	0.824132	0.778768	0.981205	0.774616	SMED30016669	uniq_SMEDS2F2_00019498-RA	033226_uniq	369	SMEDS2F2_0001949	0	.	.	.	.	.	.	.	.	.
SMED30009878	0.0315623	0.059044	0.059952	0.117641	0.0111706	-0.0165567	0.133956	0.00543744	0.0315623		0	0	0	0	0	0	0	0	0.502777	0.20941	0.200989	0.0123211	0.814365	0.726572	0.00438525	0.908118	0.881621	0.564285	0.508202	0.146608	0.948886	0.924412	0.0800302	0.978835	SMED30009878	SxlWT_comp54628_c0_seq4	SxlWT	2618	SMEDS2F2_0001277	0	1	.	0	Q9NPB8	3e-91	Glycerophosphocholine phosphodiesterase GPCPD1	XP_004383104.1	1e-90	glycerophosphocholine phosphodiesterase GPCPD1 [Trichechus manatus latirostris]
SMED30030460	0.0510185	0.00842477	0.0300492	-0.0298857	-0.00308117	-0.0466056	-0.0183528	-0.098868	0.0510185		0	0	0	0	0	0	0	0	0.272938	0.856947	0.518084	0.525434	0.94792	0.321273	0.696853	0.0354982	0.76043	0.95618	0.782423	0.858445	0.987694	0.717339	0.911949	0.310108	SMED30030460	AsxlWT_comp52510_c0_seq4	AsxlWT	1980	SMEDS2F2_0000653	1	1	.	0	Q96GM5	7e-156	SWI/SNF-related matrix-associated actin-dependent regulator of chromatin subfamily D member 1	CDJ07602.1	2e-166	SWI:SNF matrix associated [Hymenolepis microstoma]
SMED30025030	0.683381	0.691392	-0.567424	0.0367741	1.33953	-0.882819	-2.07223	-0.926585	0.683381		0	0	0	0	0	0	0	0	0.301636	0.296059	0.481859	0.960506	0.0261496	0.303451	0.0474665	0.278426	0.780196	0.6547	0.757662	0.991241	0.220522	0.704226	0.310379	0.710141	SMED30025030	SRG12_303796_c0s1	SRG12	372	NA	NA	1	.	0	.	.	.	.	.	.
SMED30008067	-0.0929173	-0.103587	-0.0509219	-0.246277	-0.0346599	-0.188558	-0.033642	-0.102732	-0.0929173		0	0	0	0	0	0	0	0	0.674594	0.640895	0.815632	0.283257	0.876547	0.404143	0.879704	0.6413	0.934906	0.869151	0.934077	0.705105	0.968124	0.777808	0.970611	0.900236	SMED30008067	AsxlWT_comp52267_c0_seq2	AsxlWT	711	smed012784	1	1	.	2	Q9HBA0	5e-09	Transient receptor potential cation channel subfamily V member 4	XP_006816006.1	2e-53	transient receptor potential cation channel subfamily V member 6-like [Saccoglossus kowalevskii]
SMED30027219	0.307442	-0.154318	-0.35203	0.356386	0.133144	0.200621	0.0579593	0.0807859	0.307442		0	0	0	0	0	0	0	0	0.151316	0.50732	0.141013	0.0963269	0.553925	0.360092	0.798629	0.715696	0.649907	0.803893	0.424225	0.454268	0.847875	0.747292	0.94571	0.928811	SMED30027219	AsxlX1_comp80685_c0_seq26	AsxlX1	1374	NA	NA	1	.	0	Q9HCI6	3e-44	Uncharacterized protein KIAA1586 [Homo sapiens]	XP_003254164.1	3e-43	uncharacterized protein KIAA1586 homolog isoform 2 [Nomascus leucogenys]
SMED30033082	-0.705823	0.575596	-0.0772066	-0.020523	0.284522	1.152	0.660864	-0.368033	-0.705823		0	0	0	0	0	0	0	0	0.461733	0.479416	0.930196	0.982705	0.739819	0.132197	0.418198	0.687187	0.860228	0.786404	0.976572	0.996782	0.925125	0.512667	0.776966	0.918029	SMED30033082	uniq_smed26099	033226_uniq	466	smed26099	0	.	.	.	.	.	.	.	.	.
SMED30028095	-0.170502	-0.0787231	-0.0988582	-0.212294	-0.0725171	-0.191074	-0.240986	-0.25024	-0.170502		0	0	0	0	0	0	0	0	0.00885305	0.224656	0.126909	0.00119352	0.265955	0.0034253	0.000244782	0.000129142	0.214493	0.581175	0.401718	0.0276686	0.647758	0.0755555	0.0114109	0.00833758	SMED30028095	AsxlWT_comp43134_c0_seq2	AsxlWT	1748	isotig21247	2	1	.	0	Q5E9I1	1e-12	Cyclin-G1 [Bos taurus]	CDJ14403.1	6e-22	cyclin G2 [Hymenolepis microstoma]
SMED30003725	-0.535729	0.129495	0.345048	0.0398437	-0.391418	0.0468632	0.374188	0.348505	-0.535729		0	0	0	0	0	0	0	0	0.107628	0.663545	0.225961	0.895906	0.237016	0.876947	0.195475	0.221388	0.588223	0.881233	0.536591	0.973593	0.621416	0.970249	0.592464	0.661458	SMED30003725	uniq_sm_505696	033226_uniq	469	sm_505696	0	.	.	.	.	.	.	XP_002162981.2	0.0001	uncharacterized protein LOC100214701 [Hydra vulgaris]
SMED30007660	0.159985	0.0332934	-0.0585659	-0.32348	-0.164831	-0.269651	-0.0748409	0.00824568	0.159985		0	0	0	0	0	0	0	0	0.296084	0.831021	0.709197	0.0499506	0.310338	0.0981167	0.639862	0.957757	0.775836	0.947273	0.889283	0.327703	0.692525	0.456329	0.888826	0.990222	SMED30007660	AsxlWT_comp54030_c0_seq1	AsxlWT	1681	smed006522	8	1	.	2	Q09274	4e-06	Degenerin-like protein unc-105	AGS83418.1	2e-99	asic [Schmidtea mediterranea]
SMED30033686	0.0386352	0.0265341	-0.0140583	0.0111609	0.117854	0.0318629	0.0462712	0.116437	0.0386352		0	0	0	0	0	0	0	0	0.490352	0.636221	0.802085	0.842949	0.0358316	0.570194	0.411026	0.0364847	0.874356	0.866842	0.928381	0.962223	0.25933	0.864145	0.774162	0.313381	SMED30033686	AsxlWT_comp47925_c0_seq1	AsxlWT	1768	SMEDS2F2_0002355	7	1	.	0	Q60803	6e-18	TNF receptor-associated factor 3	AFJ24792.1	2e-24	TNF receptor associated factor-2, partial [Schmidtea mediterranea]
SMED30018084	-0.0392604	0.188829	0.116282	-0.0412625	0.21132	0.191948	0.0516214	0.245295	-0.0392604		0	0	0	0	0	0	0	0	0.829233	0.280939	0.509029	0.822349	0.233336	0.274019	0.776439	0.154421	0.972837	0.639428	0.777015	0.95613	0.618447	0.679806	0.937743	0.580398	SMED30018084	AY066594.1	GenBank	428	AAA.454ESTABI.82	6	.	.	.	.	.	.	.	.	.
SMED30027305	0.392398	0.512441	0.257383	0.0134975	0.239317	0.383193	0.479069	0.251282	0.392398		0	1	0	0	0	0	0	0	0.0446043	0.00775767	0.193774	0.948181	0.237496	0.05076	0.0140859	0.20538	0.441063	0.0981428	0.498623	0.988022	0.622065	0.340576	0.166158	0.645109	SMED30027305	berlin_isotig12561	Berlin	456	sm_647912	0	.	.	.	.	.	.	.	.	.
SMED30014204	0.0502376	0.0493295	0.113415	0.0463639	0.145563	0.0438854	-0.00998427	0.00314023	0.0502376		0	0	0	0	0	0	0	0	0.311163	0.32029	0.0213656	0.351983	0.00337434	0.377186	0.842032	0.949601	0.784963	0.67489	0.142823	0.759552	0.0681244	0.758829	0.958795	0.987925	SMED30014204	Sxlembryo_comp61508_c0_seq2	Sxlembryo	1067	SMEDS2F2_0002373	0	1	.	0	Q99N93	3e-34	39S ribosomal protein L16, mitochondrial	CCD75784.1	2e-57	ribosomal protein related [Schistosoma mansoni]
SMED30017613	0.836716	-0.393456	0.359091	0.754655	0.48775	0.49775	-0.182182	0.876008	0.836716		0	0	0	0	0	0	0	0	0.10135	0.521787	0.509586	0.147377	0.371382	0.354983	0.762054	0.0836525	0.577502	0.81172	0.777113	0.548458	0.739064	0.744131	0.931497	0.458612	SMED30017613	Sxlembryo_comp73760_c0_seq1	Sxlembryo	780	NA	NA	1	.	0	.	.	.	.	.	.
SMED30010874	-0.15258	-0.207468	-0.0572575	-0.232828	-0.221452	-0.129908	-0.319421	-0.0544304	-0.15258		0	0	0	0	0	0	0	0	0.261134	0.130408	0.66711	0.0932731	0.112652	0.338789	0.0237739	0.682713	0.751635	0.456506	0.866067	0.447953	0.453042	0.732585	0.218797	0.916079	SMED30010874	AsxlX1_comp64287_c0_seq1	AsxlX1	1709	SMEDS2F2_0001561	1	1	.	11	Q05940	2e-144	Synaptic vesicular amine transporter	AHB51760.1	0	vesicular monoamine transporter [Schmidtea mediterranea]
SMED30008401	-0.0506745	-0.142379	-0.289059	-0.322676	-0.298607	-0.0598088	-0.234544	-0.175707	-0.0506745		0	0	0	0	0	0	0	0	0.828235	0.547834	0.229214	0.187418	0.224254	0.7988	0.333814	0.458224	0.972635	0.825081	0.540822	0.605128	0.609512	0.949087	0.725155	0.825654	SMED30008401	berlin_CUFF.32028.1	Berlin	890	sm_rc_500859	9	.	.	.	.	.	.	.	.	.
SMED30030822	-0.00122472	0.00344042	0.014319	-0.00859606	0.146688	0.127338	0.0894315	0.0946686	-0.00122472		0	0	0	0	0	0	0	0	0.985072	0.958094	0.82644	0.895852	0.0247708	0.0505532	0.171685	0.145837	0.998873	0.989583	0.938791	0.973593	0.213625	0.34013	0.561003	0.567489	SMED30030822	Sxlembryo_comp99926_c0_seq31	Sxlembryo	1407	smed000964	1	1	.	0	Q02040	1e-28	A-kinase anchor protein 17A	ELU01381.1	4e-34	hypothetical protein CAPTEDRAFT_44731, partial [Capitella teleta]
SMED30010618	-0.0384955	0.0763391	0.132249	-0.0169267	-0.0625012	-0.00880241	0.013031	-0.164505	-0.0384955		0	0	0	0	0	0	0	0	0.789655	0.592511	0.348473	0.906966	0.669728	0.951305	0.9283	0.259614	0.966496	0.845105	0.658496	0.97651	0.901131	0.989424	0.981941	0.69517	SMED30010618	dd_smedV4_14489_0_1	Dresden	738	smed012686	2	1	.	0	.	.	.	.	.	.
SMED30005814	0.0381858	0.0343581	0.179677	0.0501751	0.150635	0.126636	0.194258	0.0284903	0.0381858		0	0	0	0	0	0	0	0	0.645582	0.679487	0.0274278	0.547488	0.0694633	0.124439	0.0183018	0.731023	0.924029	0.887928	0.167005	0.865242	0.359297	0.502122	0.192044	0.933755	SMED30005814	AsxlWT_comp52578_c0_seq1	AsxlWT	606	SMEDS2F2_0000846	0	1	.	0	B5FXU9	8e-42	Molybdopterin synthase catalytic subunit	XP_008101061.1	2e-41	molybdopterin synthase catalytic subunit-like, partial [Anolis carolinensis]
SMED30029058	-0.0473463	-0.0410691	0.115651	-0.0795994	-0.0933303	0.0365	-0.028286	-0.0558082	-0.0473463		0	0	0	0	0	0	0	0	0.474517	0.535199	0.07402	0.234055	0.1664	0.578671	0.671455	0.398282	0.869252	0.81792	0.298878	0.65589	0.537137	0.867037	0.902498	0.794638	SMED30029058	AsxlWT_comp48996_c0_seq3	AsxlWT	1227	smed017062	0	2	.	2	O14662	1e-63	Syntaxin-16	AAW27645.1	2e-84	SJCHGC01269 protein [Schistosoma japonicum]
SMED30011077	0.23199	0.240379	0.116262	-0.172431	-0.153215	0.23359	0.38991	-0.0904302	0.23199		0	0	0	0	0	0	0	0	0.340395	0.323248	0.637719	0.513187	0.563525	0.338899	0.104324	0.724052	0.802056	0.678286	0.85114	0.854197	0.853477	0.732635	0.449404	0.931012	SMED30011077	OX_Smed_1.0.09281	Oxford	461	NA	NA	.	.	.	.	.	.	.	.	.
SMED30004225	0.0893001	-0.00697779	0.0607595	0.0813909	0.165542	-0.00224429	0.0976769	0.120952	0.0893001		0	0	0	0	0	0	0	0	0.274962	0.932995	0.457317	0.323849	0.0438079	0.978448	0.237195	0.136108	0.761105	0.981138	0.743182	0.739255	0.290155	0.995134	0.638696	0.555476	SMED30004225	Sxlembryo_comp94920_c0_seq5	Sxlembryo	2352	SMEDS2F2_0000782	0	1	.	0	Q5UPG5	2e-14	Putative ankyrin repeat protein L93 [Acanthamoeba polyphaga mimivirus]	XP_001582849.1	5e-19	ankyrin repeat protein [Trichomonas vaginalis G3]
SMED30005912	0.265823	0.402102	0.3052	0.411723	0.334084	0.285084	0.117213	0.0635396	0.265823		0	0	0	0	0	0	0	0	0.00120323	8.23592e-07	0.000189719	4.67194e-07	4.97978e-05	0.000516074	0.158815	0.443811	0.066893	7.38061e-05	0.00512651	3.64302e-05	0.00401876	0.0228849	0.540913	0.819738	SMED30005912	Sxlembryo_comp100083_c0_seq1	Sxlembryo	3011	sm_rc_523348	1	3	.	1	P14912	1e-35	4-coumarate--CoA ligase 1	ESO93533.1	5e-51	hypothetical protein LOTGIDRAFT_232607 [Lottia gigantea]
SMED30011713	0.365493	0.352681	0.316336	0.319709	0.34396	0.243695	0.0891349	-0.0565785	0.365493		0	0	0	0	0	0	0	0	2.21551e-06	5.07219e-06	4.24354e-05	3.76835e-05	9.66681e-06	0.0017119	0.256225	0.472229	0.000579646	0.000337632	0.00159364	0.00158002	0.00121426	0.0494637	0.656292	0.830527	SMED30011713	AsxlX1_comp68368_c0_seq3	AsxlX1	1176	SMEDS2F2_0000103	1	1	.	0	A7MCT6	1e-65	Ethanolamine kinase 2	KDR07130.1	4e-69	Ethanolamine kinase [Zootermopsis nevadensis]
SMED30016433	0.325972	0.266864	0.61042	0.826668	0.546443	0.733203	0.382137	0.66353	0.325972	3	0	0	0	1	0	1	0	1	0.215418	0.315983	0.0145352	0.000713999	0.0340153	0.00298479	0.148095	0.00738692	0.713518	0.671645	0.111146	0.0181039	0.252578	0.069787	0.527709	0.132633	SMED30016433	uniq_sm_263893	033226_uniq	387	sm_263893	0	.	.	.	.	.	.	.	.	.
SMED30015401	-0.0436503	-0.0769028	-0.152217	-0.108802	-0.0206451	0.111449	0.0217319	0.0530346	-0.0436503		0	0	0	0	0	0	0	0	0.726341	0.538001	0.22354	0.38508	0.868906	0.369529	0.861742	0.669653	0.953537	0.819656	0.533711	0.782806	0.966072	0.754817	0.966002	0.910945	SMED30015401	AsxlX1_comp77463_c0_seq2	AsxlX1	2029	sm_rc_728803	0	1	.	0	.	.	.	.	.	.
SMED30001116	-0.0944493	-0.356571	-0.414253	-0.292502	-0.131766	-0.164464	-0.265542	-0.122242	-0.0944493		0	0	0	0	0	0	0	0	0.212061	3.01787e-06	5.94767e-08	0.000126667	0.0830433	0.0302403	0.000499778	0.106354	0.710573	0.000216228	6.26509e-06	0.00434591	0.391009	0.261627	0.0189682	0.508416	SMED30001116	Sxlembryo_comp99253_c0_seq4	Sxlembryo	5778	SMEDS2F2_0001895	0	1	.	0	Q96MT7	0	WD repeat-containing protein 52 [Homo sapiens]	XP_004938274.1	0	uncharacterized protein LOC418359 isoform X5 [Gallus gallus]
SMED30010649	-0.0228137	-0.00279172	-0.0119333	-0.039908	-0.039991	-0.0493827	-0.0148851	-0.0168468	-0.0228137		0	0	0	0	0	0	0	0	0.638223	0.954088	0.805109	0.413491	0.414465	0.310589	0.760325	0.72792	0.922179	0.988571	0.929539	0.797771	0.768729	0.710769	0.93072	0.932569	SMED30010649	AsxlWT_comp59909_c0_seq4	AsxlWT	1205	SMEDS2F2_0000492	4	1	.	0	Q9UH92	2e-24	Max-like protein X	EFX82834.1	1e-29	hypothetical protein DAPPUDRAFT_210427 [Daphnia pulex]
SMED30015416	0.288787	0.179389	-0.0934754	-0.108678	0.31827	0.499863	0.233983	0.343111	0.288787		0	0	0	0	0	0	0	0	0.0789793	0.281269	0.584933	0.5309	0.0547295	0.00189598	0.160891	0.0351907	0.536434	0.640036	0.828152	0.861407	0.322667	0.0522196	0.543682	0.309168	SMED30015416	SxlWT_comp63702_c1_seq1	SxlWT	2675	sm_465378	12	1	.	0	.	.	.	AAP51085.1	1e-09	transposase [Forficula auricularia]
SMED30019632	0.00309643	-0.0812937	0.19838	0.105646	0.0383351	0.0355809	0.119753	0.155069	0.00309643		0	0	0	0	0	0	0	0	0.979055	0.493651	0.0869288	0.368397	0.746584	0.762612	0.30833	0.182645	0.997643	0.794542	0.325786	0.773165	0.927313	0.937085	0.703167	0.618243	SMED30019632	AsxlWT_comp42279_c0_seq1	AsxlWT	847	SMEDS2F2_0002853	1	1	.	0	Q7T364	5e-19	Tumor necrosis factor, alpha-induced protein 8-like protein 2 B	CCD77140.1	9e-22	putative tumor necrosis factor induced protein [Schistosoma mansoni]
SMED30015036	0.549745	0.955002	0.560662	0.0351332	0.014599	-0.429446	-0.115306	0.153945	0.549745	2	1	1	1	0	0	0	0	0	2.50126e-05	4.89314e-14	1.60797e-05	0.797696	0.915626	0.00272017	0.408407	0.252504	0.00429899	1.65053e-11	0.000722513	0.949018	0.978847	0.065487	0.772236	0.691069	SMED30015036	AsxlX1_comp83089_c0_seq13	AsxlX1	1543	SMEDS2F2_0002567	2	2	YES	0	.	.	.	EFA11742.1	7e-21	hypothetical protein TcasGA2_TC005292 [Tribolium castaneum]
SMED30000239	0.0468047	-0.0472377	-0.198054	0.301489	0.36865	0.296307	0.196934	0.200302	0.0468047		0	0	0	0	0	0	0	0	0.864187	0.865199	0.483964	0.255485	0.163145	0.261981	0.467039	0.451231	0.977674	0.958302	0.759492	0.678332	0.532156	0.669129	0.8076	0.823198	SMED30000239	uniq_sm_480459	033226_uniq	695	sm_480459	0	.	.	.	.	.	.	.	.	.
SMED30034551	-0.462932	-1.08343	-0.492723	-1.04635	-0.0652923	-0.136705	0.570604	-0.0541856	-0.462932		0	0	0	0	0	0	0	0	0.447298	0.10968	0.418076	0.123236	0.910386	0.81332	0.270859	0.923654	0.854241	0.423254	0.715842	0.510536	0.977933	0.953662	0.668871	0.98271	SMED30034551	AsxlX1_comp56005_c0_seq2	AsxlX1	1213	NA	NA	1	.	7	.	.	.	.	.	.
SMED30028210	-0.101393	0.368707	0.494842	0.595016	0.122512	0.472714	0.387561	0.334338	-0.101393		0	0	0	1	0	0	0	0	0.479544	0.00845801	0.000373859	1.87781e-05	0.389574	0.000703665	0.00576138	0.0169784	0.870404	0.103345	0.00852211	0.000875368	0.750257	0.0280169	0.0952856	0.211497	SMED30028210	OX_Smed_1.0.07827	Oxford	1072	SMEDS2F2_0000634	0	.	.	.	.	.	.	.	.	.
SMED30020096	-0.201146	-0.16411	-0.246065	-0.280149	-0.149952	-0.332869	-0.363398	-0.244954	-0.201146		0	0	0	0	0	0	0	0	0.00845636	0.0315041	0.00128493	0.000263977	0.0500924	1.48173e-05	2.4611e-06	0.00135404	0.208773	0.222679	0.0211485	0.00800489	0.309493	0.00164144	0.000331321	0.0442528	SMED30020096	SxlWT_comp64955_c3_seq7	SxlWT	1011	BRcontig25	16	1	.	0	.	.	.	.	.	.
SMED30022855	0.0882835	0.119534	0.123124	-0.00220921	-0.035776	0.0822633	0.0301291	-0.0359007	0.0882835		0	0	0	0	0	0	0	0	0.105466	0.0282952	0.0237096	0.967815	0.514738	0.131682	0.582027	0.511557	0.584492	0.210625	0.152384	0.992474	0.828273	0.511997	0.862237	0.85082	SMED30022855	OX_Smed_1.0.09296	Oxford	467	SMEDS2F2_0001543	2	.	.	.	Q6NYD1	1e-14	Reactive oxygen species modulator 1	EZA45787.1	5e-18	reactive oxygen species modulator 1-like protein [Microplitis demolitor]
SMED30035108	0.155411	-0.119765	0.084442	-0.469073	-0.162163	0.0745728	-0.289562	-0.288973	0.155411		0	0	0	0	0	0	0	0	0.545811	0.655602	0.744228	0.100306	0.554377	0.775382	0.299067	0.291189	0.8968	0.877661	0.904951	0.462501	0.848342	0.942236	0.694215	0.720022	SMED30035108	uniq_sm_rc_621828	033226_uniq	323	sm_rc_621828	0	.	.	.	.	.	.	.	.	.
SMED30033017	0.308821	0.149161	0.277425	-0.000748238	0.611407	0.0898629	0.386749	0.311785	0.308821		0	0	0	0	0	0	0	0	0.312895	0.636018	0.364541	0.998167	0.0383671	0.778361	0.206545	0.305545	0.785171	0.866683	0.673002	0.99987	0.269747	0.942415	0.605123	0.731556	SMED30033017	SxlWT_comp63910_c0_seq2	SxlWT	5626	sm_592824	4	2	.	0	P00750	5e-10	Tissue-type plasminogen activator	XP_003464674.2	7e-12	tissue-type plasminogen activator [Cavia porcellus]
SMED30014702	0.286794	0.195462	0.319999	0.229705	0.211187	0.37966	0.328838	0.351411	0.286794		0	0	0	0	0	0	0	0	0.0321568	0.151372	0.0156041	0.0922435	0.126201	0.00408582	0.0146946	0.00761549	0.385928	0.488878	0.116776	0.444963	0.477345	0.0853762	0.169933	0.135275	SMED30014702	AsxlX1_comp17216_c0_seq1	AsxlX1	771	smed012110	2	1	.	1	.	.	.	.	.	.
SMED30012783	-0.109881	-0.200465	-0.129439	-0.456056	-0.264572	-0.152999	-0.440691	-0.336533	-0.109881		0	0	0	0	0	0	0	0	0.515315	0.24042	0.442804	0.00973319	0.127865	0.368208	0.0126231	0.0510078	0.884876	0.598528	0.73469	0.125247	0.480816	0.753561	0.155942	0.366053	SMED30012783	AsxlWT_comp57655_c0_seq1	AsxlWT	994	SMEDS2F2_0001946	1	2	.	4	.	.	.	.	.	.
SMED30023645	0.130462	0.127664	0.317667	0.285528	0.234063	0.120726	0.0621612	0.142239	0.130462		0	0	0	0	0	0	0	0	0.358961	0.369948	0.0220105	0.0422605	0.099567	0.397811	0.667766	0.31536	0.812728	0.715338	0.145418	0.301612	0.428414	0.774091	0.900785	0.737291	SMED30023645	Sxlregen_comp31302_c0_seq1	Sxlregen	1479	SMEDS2F2_0002546	0	1	.	7	P50129	2e-09	5-hydroxytryptamine receptor 2A	XP_006258680.1	7e-08	5-hydroxytryptamine receptor 2A [Alligator mississippiensis]
SMED30014045	-0.136869	-0.187413	-0.251304	0.118659	0.0718382	-0.125885	-0.411004	0.155326	-0.136869		0	0	0	0	0	0	0	0	0.442545	0.297839	0.164192	0.491275	0.681744	0.480968	0.029924	0.358207	0.852908	0.656256	0.45974	0.842161	0.905223	0.818011	0.246123	0.770625	SMED30014045	Sxlregen_comp27933_c0_seq1	Sxlregen	1766	sm_rc_510471	6	2	YES	0	.	.	.	.	.	.
SMED30030437	0.232491	0.0898316	0.128674	-0.0158081	0.233628	-0.102883	-0.112214	-0.0651942	0.232491		0	0	0	0	0	0	0	0	0.0950457	0.527589	0.360119	0.913252	0.0981865	0.481804	0.447448	0.651874	0.56636	0.814534	0.668798	0.97896	0.425538	0.818462	0.797228	0.904732	SMED30030437	OX_Smed_1.0.13859	Oxford	451	SMEDS2F2_0000576	0	1	.	0	.	.	.	GAA31923.2	6e-11	hypothetical protein CLF_106366 [Clonorchis sinensis]
SMED30016998	-0.381987	-0.796476	-0.557515	-0.0818933	-0.241276	0.170679	0.194411	0.0553336	-0.381987		0	0	0	0	0	0	0	0	0.242705	0.0236996	0.0961403	0.793692	0.457952	0.566874	0.516841	0.854284	0.738818	0.190512	0.344735	0.948129	0.796932	0.8626	0.831916	0.966296	SMED30016998	OX_Smed_1.0.05184	Oxford	447	NA	NA	.	.	.	.	.	.	.	.	.
SMED30023375	-0.0855097	-0.231115	0.148903	0.135655	-0.0645706	0.202706	0.258762	0.0575817	-0.0855097		0	0	0	0	0	0	0	0	0.782957	0.468464	0.615508	0.652844	0.837566	0.494368	0.383267	0.848429	0.965192	0.777533	0.841107	0.904928	0.95575	0.82655	0.75403	0.965018	SMED30023375	Asxlsort_comp51360_c0_seq1	Asxlsort	745	NA	NA	1	.	0	.	.	.	XP_002170114.2	8e-11	probable phospholipid-transporting ATPase ID-like [Hydra vulgaris]
SMED30019587	0.683377	0.691444	-0.929144	0.86173	1.13956	0.836059	0.758545	1.3077	0.683377		0	0	0	0	0	0	0	0	0.301619	0.296006	0.276989	0.18332	0.0673975	0.196593	0.252074	0.0275401	0.780196	0.6547	0.590623	0.600337	0.35559	0.59805	0.652651	0.272457	SMED30019587	Sxlregen_comp56157_c0_seq1	Sxlregen	728	NA	NA	1	.	0	.	.	.	ESO84634.1	2e-12	hypothetical protein LOTGIDRAFT_168492 [Lottia gigantea]
SMED30028490	-0.344773	-0.565497	-0.529962	-0.484039	-0.265528	-0.195559	-0.0520039	-0.216764	-0.344773		0	-1	0	0	0	0	0	0	0.0970344	0.00804896	0.012171	0.0228047	0.202537	0.339727	0.79774	0.288516	0.570407	0.10014	0.0984074	0.213278	0.583778	0.733368	0.945254	0.718698	SMED30028490	Asxlsort_comp80368_c1_seq2	Asxlsort	1959	rc_smed004776	1	2	.	1	.	.	.	EFA11706.1	2e-20	hypothetical protein TcasGA2_TC001793 [Tribolium castaneum]
SMED30005220	0.325702	0.287901	0.0852791	0.180395	-0.225702	0.130339	0.0585054	-0.0952295	0.325702	2	0	0	0	0	0	0	0	0	0.0067628	0.0166637	0.47817	0.133612	0.061191	0.278423	0.626745	0.42876	0.188593	0.155747	0.755693	0.529878	0.339717	0.683513	0.883192	0.810749	SMED30005220	OX_Smed_1.0.09444	Oxford	422	sm_rc_368651	1	2	YES	0	.	.	.	.	.	.
SMED30013859	-0.137951	-0.0665222	-0.122578	-0.141117	-0.122203	-0.179462	-0.0654472	-0.121607	-0.137951		0	0	0	0	0	0	0	0	0.0077814	0.196157	0.0173915	0.00685318	0.019745	0.000590395	0.207232	0.0183995	0.201211	0.548333	0.124966	0.0985341	0.190141	0.0250078	0.60585	0.220209	SMED30013859	AsxlWT_comp35715_c0_seq1	AsxlWT	1303	SMEDS2F2_0000080	8	1	.	0	.	.	.	.	.	.
SMED30016018	-0.173167	0.0569166	0.19694	0.256503	-0.320853	-0.341006	-0.0475566	0.0587677	-0.173167		0	0	0	0	0	0	0	0	0.36646	0.759289	0.276527	0.157713	0.107276	0.0838498	0.802953	0.75033	0.817627	0.921776	0.590354	0.564385	0.443093	0.427305	0.946611	0.939992	SMED30016018	AsxlX1_comp76957_c0_seq3	AsxlX1	1924	SMEDS2F2_0002725	0	1	YES	0	P14324	7e-28	Farnesyl pyrophosphate synthase	XP_004436228.1	4e-28	farnesyl pyrophosphate synthase isoform 2 [Ceratotherium simum simum]
SMED30010631	-0.178479	-0.116615	-0.08747	-0.257542	-0.18891	-0.172565	-0.0862087	-0.251408	-0.178479		0	0	0	0	0	0	0	0	0.0326358	0.15884	0.284559	0.00259368	0.0267013	0.0394721	0.301408	0.00281436	0.389155	0.499342	0.598024	0.0493686	0.223101	0.300317	0.696216	0.0730881	SMED30010631	AsxlWT_comp56229_c0_seq1	AsxlWT	1292	SMEDS2F2_0002818	0	1	.	4	Q11098	2e-11	Tetraspanin-17 [Caenorhabditis elegans]	ESP00577.1	5e-22	hypothetical protein LOTGIDRAFT_157853 [Lottia gigantea]
SMED30010138	-0.0409659	0.068579	0.0736642	0.0412664	-0.097452	0.0351851	0.0442583	0.0536912	-0.0409659		0	0	0	0	0	0	0	0	0.405422	0.160942	0.130943	0.401233	0.0503856	0.473263	0.368527	0.271921	0.83891	0.502719	0.408633	0.788914	0.310537	0.813503	0.743528	0.706661	SMED30010138	AsxlWT_comp37243_c0_seq1	AsxlWT	1672	SMEDS2F2_0000095	8	1	.	0	Q6NRT5	5e-105	COP9 signalosome complex subunit 1	ELU09497.1	3e-112	hypothetical protein CAPTEDRAFT_174845 [Capitella teleta]
SMED30015949	0.128906	0.0747859	0.0310278	0.225287	-0.0751394	-0.282627	-0.407027	-0.219985	0.128906		0	0	0	0	0	0	0	0	0.643501	0.790076	0.91195	0.416517	0.795902	0.338741	0.179542	0.44966	0.923582	0.932998	0.970311	0.800056	0.942437	0.732585	0.572499	0.822276	SMED30015949	uniq_sm_699331	033226_uniq	514	sm_699331	0	.	.	.	.	.	.	.	.	.
SMED30032254	0.179712	0.0925187	0.124763	0.146213	0.248939	0.244289	0.120564	0.102455	0.179712		0	0	0	0	0	0	0	0	0.0781336	0.369121	0.222251	0.155366	0.0150262	0.0161609	0.243935	0.317563	0.535035	0.714605	0.532456	0.561215	0.164859	0.189075	0.644646	0.739145	SMED30032254	AsxlWT_comp18592_c0_seq1	AsxlWT	467	SMEDS2F2_0001544	0	1	.	0	Q8WUD4	6e-09	Coiled-coil domain-containing protein 12 [Homo sapiens]	XP_008069423.1	2e-07	coiled-coil domain-containing protein 12 [Tarsius syrichta]
SMED30028120	0.439218	-0.0118597	-0.801126	-0.0690054	0.175425	-0.668324	-0.395384	0.177179	0.439218		0	0	0	0	0	0	0	0	0.214435	0.975204	0.060911	0.858121	0.639576	0.113798	0.33333	0.62868	0.712948	0.994169	0.268953	0.966816	0.889542	0.484158	0.724825	0.894692	SMED30028120	AsxlX1_comp31005_c0_seq1	AsxlX1	364	smed020947	0	1	.	0	.	.	.	.	.	.
SMED30033527	0.39515	0.536198	0.558615	0.29752	0.419785	0.382054	0.163821	0.0579637	0.39515		0	0	0	0	0	0	0	0	0.223826	0.0911585	0.0752079	0.372184	0.202193	0.242509	0.633123	0.865704	0.72075	0.387414	0.301283	0.774725	0.58332	0.650382	0.885965	0.968848	SMED30033527	berlin_isotig25410	Berlin	493	isotig25410	0	1	.	0	O15910	8e-09	Ribonucleoside-diphosphate reductase small chain	XP_004481838.1	1e-08	ribonucleoside-diphosphate reductase subunit M2-like [Dasypus novemcinctus]
SMED30034517	-0.295282	-0.230786	-0.0655953	-0.100942	-0.494786	-0.292276	-0.235694	-0.0618373	-0.295282		0	0	0	0	0	0	0	0	0.192463	0.304081	0.762672	0.648614	0.0377911	0.198551	0.300258	0.775932	0.692524	0.662181	0.913214	0.902904	0.26783	0.600685	0.694739	0.9469	SMED30034517	berlin_isotig19496	Berlin	619	sm_639015	0	.	.	.	.	.	.	.	.	.
SMED30027269	0.0384001	-0.293519	-0.16165	-0.141348	-0.0940293	0.21662	0.0851809	-0.0589625	0.0384001		0	0	0	0	0	0	0	0	0.712978	0.00702209	0.12917	0.188249	0.381877	0.0345324	0.416486	0.57549	0.949194	0.092339	0.405543	0.606051	0.744203	0.280264	0.776481	0.879136	SMED30027269	AsxlWT_comp62045_c0_seq1	AsxlWT	2826	sm_95723	0	1	YES	0	Q3UQ28	2e-05	Peroxidasin homolog	ELU01675.1	1e-05	hypothetical protein CAPTEDRAFT_214871 [Capitella teleta]
SMED30025000	0.086252	0.0434651	0.0778965	0.00481389	0.265593	0.127674	0.218139	0.191164	0.086252		0	0	0	0	0	0	0	0	0.358492	0.645473	0.405724	0.959767	0.00438652	0.173165	0.0194971	0.0390338	0.812247	0.870923	0.705928	0.991241	0.0796177	0.570959	0.198223	0.323566	SMED30025000	AsxlWT_comp17327_c0_seq1	AsxlWT	1483	SMEDS2F2_0001567	3	1	.	7	.	.	.	EKC35044.1	5e-38	C-C chemokine receptor type 1 [Crassostrea gigas]
SMED30024814	0.921615	1.63544	2.43241	1.88706	0.216856	0.00651852	0.718568	1.36496	0.921615	3	1	1	1	1	0	0	0	1	0.00487263	3.26623e-08	6.63831e-20	5.45257e-11	0.557833	0.986259	0.0352934	8.15513e-06	0.158356	4.26329e-06	3.37777e-17	1.04931e-08	0.850352	0.996153	0.268004	0.000865107	SMED30024814	SRG12_226095_c0s1	SRG12	577	NA	NA	1	.	0	.	.	.	XP_003240346.1	0.0004	SCAN domain-containing protein 3-like [Acyrthosiphon pisum]
SMED30004759	0.530395	0.0573168	-0.0405984	0.0394523	0.406022	0.489855	-0.156257	0.257226	0.530395		0	0	0	0	0	0	0	0	0.038125	0.836859	0.885158	0.888491	0.126991	0.058229	0.593716	0.335308	0.417719	0.948917	0.959107	0.973593	0.478962	0.363429	0.868457	0.753542	SMED30004759	AsxlX1_comp83072_c0_seq16	AsxlX1	1681	rc_smed27343	0	1	.	0	.	.	.	XP_008365149.1	2e-10	uncharacterized protein LOC103428812 [Malus domestica]
SMED30010568	0.397079	0.380308	0.273228	0.348623	0.643652	-0.114836	0.264935	0.311701	0.397079		0	0	0	0	0	0	0	0	0.21401	0.235243	0.397486	0.280676	0.0407259	0.736297	0.419124	0.333469	0.712555	0.592069	0.699915	0.70347	0.278758	0.928297	0.777351	0.753222	SMED30010568	uniq_smed28546	033226_uniq	505	smed28546	0	.	.	.	.	.	.	.	.	.
SMED30000275	-0.0512213	0.0426533	-0.00979931	0.0145518	-0.08705	0.0126438	-0.13228	-0.0739968	-0.0512213		0	0	0	0	0	0	0	0	0.34866	0.431196	0.85666	0.7898	0.116608	0.816283	0.0173153	0.175698	0.805315	0.754204	0.949127	0.946637	0.46071	0.954233	0.18652	0.610901	SMED30000275	Asxlsort_comp80904_c0_seq1	Asxlsort	8027	smed010257	6	3	.	0	O75691	9e-24	Small subunit processome component 20 homolog	XP_969008.2	4e-30	small subunit processome component 20 homolog [Tribolium castaneum]
SMED30003981	-0.121539	0.0157312	0.160543	-0.0919372	-0.0900392	-0.0437023	-0.0160769	0.0667173	-0.121539		0	0	0	0	0	0	0	0	0.287859	0.888922	0.145495	0.422899	0.435287	0.700469	0.887878	0.549814	0.769692	0.965516	0.431185	0.80342	0.78091	0.916566	0.972526	0.868735	SMED30003981	AsxlWT_comp45893_c0_seq1	AsxlWT	735	SMEDS2F2_0002089	4	2	.	0	Q66IC8	6e-23	Tctex1 domain-containing protein 1 [Danio rerio]	EKC27270.1	1e-29	Tctex1 domain-containing protein 1 [Crassostrea gigas]
SMED30025017	0.0228031	0.0721149	-0.0203903	-0.101381	0.12266	-0.00489317	0.007317	-0.00896106	0.0228031		0	0	0	0	0	0	0	0	0.787922	0.393363	0.810032	0.23905	0.148192	0.954157	0.931766	0.915879	0.966211	0.733352	0.931509	0.661383	0.510369	0.989946	0.981941	0.981451	SMED30025017	AsxlWT_comp17245_c0_seq1	AsxlWT	1286	smed001392	4	1	.	0	.	.	.	.	.	.
SMED30025540	0.604515	0.0916516	-0.0778122	0.130685	-0.0998952	0.225416	-0.459472	0.287409	0.604515		0	0	0	0	0	0	0	0	0.251473	0.873579	0.894787	0.820682	0.868896	0.689671	0.473585	0.603587	0.745255	0.961043	0.962788	0.955619	0.966072	0.912576	0.810633	0.88871	SMED30025540	Sxlembryo_comp50684_c0_seq2	Sxlembryo	620	NA	NA	1	.	4	.	.	.	ELT88208.1	3e-18	hypothetical protein CAPTEDRAFT_186432 [Capitella teleta]
SMED30009632	0.196599	0.541927	1.11212	1.19166	-0.155867	0.212292	0.886278	0.505661	0.196599		0	0	0	0	0	0	0	0	0.801551	0.468779	0.108776	0.0859328	0.851608	0.785894	0.220248	0.49881	0.968638	0.777783	0.368897	0.429933	0.960103	0.944604	0.619982	0.843121	SMED30009632	uniq_sm_514368	033226_uniq	346	sm_514368	0	.	.	.	Q92193	1e-13	Actin	ABQ57386.1	4e-13	actin [Nucella lapillus]
SMED30013775	0.609048	-0.492717	-0.255314	0.508772	-0.958345	0.227333	0.372339	0.715313	0.609048		0	0	0	0	0	0	0	0	0.199863	0.391073	0.640989	0.296716	0.130194	0.655332	0.458148	0.123352	0.696322	0.731389	0.852494	0.713925	0.484674	0.898958	0.803595	0.535216	SMED30013775	AsxlX1_comp62321_c0_seq3	AsxlX1	523	NA	NA	1	.	0	.	.	.	.	.	.
SMED30035621	0.489026	0.676032	-0.1673	0.219518	0.226686	0.542525	0.434134	0.72103	0.489026		0	0	0	0	0	0	0	0	0.120954	0.0269763	0.634142	0.510432	0.499997	0.083666	0.178804	0.0167208	0.607484	0.205651	0.850192	0.852879	0.82116	0.426876	0.571353	0.210099	SMED30035621	AsxlX1_comp76741_c0_seq1	AsxlX1	1653	NA	NA	1	.	1	.	.	.	.	.	.
SMED30034767	-0.00892188	-0.0412681	0.00418195	-0.0420862	-0.0123113	-0.0633302	-0.0596514	-0.094077	-0.00892188		0	0	0	0	0	0	0	0	0.891719	0.53059	0.9489	0.524324	0.852552	0.337392	0.368753	0.153579	0.98179	0.815988	0.984086	0.85838	0.960285	0.731642	0.743624	0.579805	SMED30034767	Sxlembryo_comp62652_c0_seq2	Sxlembryo	1659	SMEDS2F2_0001382	0	1	.	0	Q8NB59	9e-52	Synaptotagmin-14	KDR11761.1	4e-56	Synaptotagmin-16 [Zootermopsis nevadensis]
SMED30003577	1.25674	0.647239	0.404208	1.30379	-0.00987878	-0.440691	0.713684	-0.968635	1.25674		0	0	0	0	0	0	0	0	0.0712783	0.400411	0.611003	0.0613542	0.990869	0.630611	0.354596	0.324594	0.521902	0.738375	0.840685	0.362011	0.997065	0.889321	0.741835	0.745629	SMED30003577	SxlWT_comp43793_c0_seq1	SxlWT	436	NA	NA	1	.	0	Q6DH42	5e-07	Transcription and mRNA export factor ENY2	GAA53301.1	2e-08	enhancer of yellow 2 transcription factor [Clonorchis sinensis]
SMED30022700	-0.0417499	0.584439	0.37498	-0.000776495	0.986216	0.213027	0.471371	0.390868	-0.0417499		0	0	0	0	0	0	0	0	0.960381	0.451701	0.637485	0.999269	0.187123	0.79465	0.554272	0.624207	0.994946	0.765482	0.85114	0.99987	0.565396	0.948028	0.848917	0.892535	SMED30022700	AY068614.1	GenBank	669	isotig06819	9	.	.	.	.	.	.	.	.	.
SMED30017828	0.0881542	0.140807	0.147421	0.282549	0.133729	0.142145	0.164812	0.114334	0.0881542		0	0	0	0	0	0	0	0	0.256599	0.0683697	0.0547179	0.000209852	0.0877453	0.0661853	0.0340231	0.138358	0.748758	0.334179	0.253345	0.00660589	0.402045	0.387169	0.263521	0.557799	SMED30017828	AsxlX1_comp74945_c1_seq1	AsxlX1	680	KG_STATA	3	2	.	0	P42228	6e-07	Signal transducer and activator of transcription 4 [Mus musculus]	XP_005986410.1	3e-08	signal transducer and activator of transcription 1-like [Latimeria chalumnae]
SMED30031987	0.43491	0.0370865	0.267596	0.245273	0.168795	-0.00102341	-0.0717692	-0.000686565	0.43491		0	0	0	0	0	0	0	0	0.03358	0.860932	0.195472	0.239849	0.423792	0.99619	0.738493	0.997431	0.39287	0.957009	0.501176	0.661544	0.774548	0.998844	0.926867	0.999357	SMED30031987	SRG12_26832_c0s2	SRG12	336	SMEDS2F2_0001800	11	1	.	2	.	.	.	.	.	.
SMED30004909	0.0199568	0.710537	0.0545859	0.369859	0.361278	0.230324	0.693681	1.25185	0.0199568	1	0	0	0	0	0	0	0	1	0.962227	0.057676	0.895713	0.355261	0.371434	0.572349	0.0679729	0.000218185	0.994946	0.306685	0.962831	0.762409	0.739064	0.864721	0.368436	0.0125003	SMED30004909	uniq_sm_476101	033226_uniq	371	sm_476101	0	.	.	.	.	.	.	.	.	.
SMED30003595	-0.439104	-0.942027	-0.30298	0.434701	-0.433993	-0.177212	-0.27423	-0.120184	-0.439104		0	0	0	0	0	0	0	0	0.200103	0.0110437	0.364777	0.152931	0.212582	0.592249	0.418367	0.712097	0.696322	0.121712	0.673312	0.558059	0.597098	0.870882	0.776966	0.927229	SMED30003595	uniq_SMEDS2F2_00029032-RA_1_235	033226_uniq	235	SMEDS2F2_0002903	0	.	.	.	.	.	.	XP_006815529.1	0.0003	microtubule-associated protein futsch-like [Saccoglossus kowalevskii]
SMED30004638	-0.723369	0.0686041	-0.301845	-0.672262	-0.817066	-0.532407	-1.44355	-0.0546039	-0.723369		0	0	0	0	0	0	-1	0	0.129774	0.872829	0.500826	0.159809	0.0968121	0.253914	0.00733313	0.899731	0.620078	0.961043	0.770593	0.567802	0.423134	0.661639	0.11085	0.976636	SMED30004638	uniq_sm_rc_689559	033226_uniq	320	sm_rc_689559	0	.	.	.	.	.	.	.	.	.
SMED30035433	0.0398889	0.219624	-0.528469	-0.103621	-0.693308	0.00881757	-0.000501288	-0.524777	0.0398889		0	0	0	0	0	0	0	0	0.93677	0.658109	0.32307	0.840735	0.211104	0.986054	0.999383	0.326733	0.989785	0.878718	0.634958	0.962105	0.59524	0.996153	0.999649	0.747512	SMED30035433	uniq_smed29102	033226_uniq	346	smed29102	0	.	.	.	.	.	.	.	.	.
SMED30022099	0.135144	0.508931	0.547718	0.130921	0.307441	0.522841	0.361422	0.827979	0.135144	1	0	0	0	0	0	0	0	1	0.616015	0.0440453	0.0280084	0.630453	0.247986	0.0385783	0.168882	0.000489344	0.915008	0.2676	0.168855	0.896209	0.631637	0.297525	0.557105	0.0221528	SMED30022099	AsxlWT_comp57033_c0_seq1	AsxlWT	851	NA	NA	1	.	0	.	.	.	.	.	.
SMED30001222	-0.0948561	-0.0974916	-0.0521827	-0.0857866	0.00287398	-0.123079	-0.140553	-0.111987	-0.0948561		0	0	0	0	0	0	0	0	0.241336	0.22891	0.517487	0.290806	0.971725	0.129558	0.0848227	0.16648	0.737514	0.585012	0.781934	0.711542	0.994094	0.508181	0.407825	0.598692	SMED30001222	AsxlWT_comp71577_c0_seq1	AsxlWT	968	SMEDS2F2_0000276	4	1	.	0	O95571	2e-94	Persulfide dioxygenase ETHE1, mitochondrial	AEV92813.1	2e-102	ETHE1 [Urechis unicinctus]
SMED30030557	0.0634922	0.00547501	-0.0293169	-0.0451179	0.0888263	-0.0718943	0.0384842	0.0732879	0.0634922		0	0	0	0	0	0	0	0	0.343973	0.935255	0.66336	0.506033	0.188163	0.288893	0.568887	0.273822	0.80363	0.981998	0.864337	0.851084	0.566802	0.693018	0.856106	0.707079	SMED30030557	AsxlWT_comp55587_c0_seq1	AsxlWT	2207	SMEDS2F2_0000981	0	1	.	10	Q6UXY8	0.0005	Transmembrane channel-like protein 5 [Homo sapiens]	XP_005523226.1	1e-09	transmembrane channel-like protein 5 [Pseudopodoces humilis]
SMED30005393	-0.0555114	-0.228721	-0.220184	0.106817	0.313942	-0.858947	-0.204622	-0.408657	-0.0555114		0	0	0	0	0	0	0	0	0.87653	0.533337	0.545612	0.760916	0.361474	0.0343279	0.580487	0.276326	0.979319	0.817346	0.801476	0.940694	0.731353	0.279587	0.861476	0.708953	SMED30005393	uniq_smed26098	033226_uniq	500	smed26098	0	.	.	.	.	.	.	.	.	.
SMED30012953	-0.302532	0.154787	0.450265	-0.0888845	0.105788	0.0321741	-0.412461	-0.0200871	-0.302532		0	0	0	0	0	0	0	0	0.532448	0.732621	0.295848	0.850966	0.819246	0.944479	0.409182	0.965445	0.890087	0.911707	0.608373	0.964071	0.951324	0.987432	0.772764	0.99163	SMED30012953	uniq_sm_606014	033226_uniq	405	sm_606014	0	.	.	.	.	.	.	.	.	.
SMED30023530	0.0190848	0.197117	0.160525	0.156863	0.0138591	0.017927	-0.0154441	-0.030214	0.0190848		0	0	0	0	0	0	0	0	0.746493	0.000702784	0.00576697	0.00742594	0.816276	0.761851	0.795731	0.609712	0.957471	0.0185861	0.0598445	0.103904	0.949651	0.936952	0.944066	0.888758	SMED30023530	AsxlWT_comp54476_c0_seq1	AsxlWT	1552	SMEDS2F2_0003098	6	1	.	0	A3KG59	2e-80	Peptidase M20 domain-containing protein 2	ESP04071.1	7e-93	hypothetical protein LOTGIDRAFT_203426 [Lottia gigantea]
SMED30018012	1.13913	1.02689	0.713146	1.67236	0.0430564	1.16062	1.21486	1.59681	1.13913	3	0	0	0	1	0	0	0	1	0.0822116	0.124598	0.30787	0.00563395	0.957001	0.076617	0.0638757	0.00826123	0.541967	0.448945	0.620251	0.0861693	0.989362	0.411228	0.358687	0.14175	SMED30018012	Asxlregen_comp60728_c0_seq2	Asxlregen	310	NA	NA	1	.	0	Q53H47	9e-14	Histone-lysine N-methyltransferase SETMAR	XP_003704718.1	1e-28	histone-lysine N-methyltransferase SETMAR-like [Megachile rotundata]
SMED30028987	0.11012	0.281062	0.161329	-0.246006	-0.115487	-0.346903	-0.336261	-0.228132	0.11012	2	0	0	0	0	0	0	0	0	0.230152	0.00202069	0.0775201	0.00884509	0.216751	0.000236118	0.000380724	0.0145533	0.72547	0.0398575	0.305211	0.11746	0.601116	0.0133494	0.0156357	0.194525	SMED30028987	AsxlWT_comp56643_c1_seq2	AsxlWT	1340	SMEDS2F2_0002495	1	1	.	0	.	.	.	.	.	.
SMED30027495	-0.0251997	0.176902	0.140449	0.330994	-0.38866	-0.0568449	-0.0840929	-0.0280518	-0.0251997		0	0	0	0	0	0	0	0	0.932191	0.539966	0.626516	0.244821	0.219956	0.848988	0.78086	0.92429	0.989193	0.820524	0.84606	0.667151	0.604809	0.963609	0.939216	0.982745	SMED30027495	uniq_sm_569256	033226_uniq	938	sm_569256	0	1	.	0	.	.	.	.	.	.
SMED30023853	-0.0429861	-0.192871	-0.117644	-0.196399	0.00604437	-0.0292298	-0.109706	-0.0331586	-0.0429861		0	0	0	0	0	0	0	0	0.521947	0.0045143	0.0806237	0.00397808	0.92859	0.663446	0.105975	0.620584	0.887759	0.0686395	0.312494	0.0679715	0.982976	0.902045	0.451784	0.891063	SMED30023853	Asxlsort_comp73400_c0_seq1	Asxlsort	1601	SMEDS2F2_0001136	5	2	.	0	.	.	.	.	.	.
SMED30026315	-0.115664	-0.193587	-0.265112	-0.00629663	-0.103678	0.0411536	-0.322866	-0.38394	-0.115664		0	0	0	0	0	0	0	0	0.758029	0.609539	0.485946	0.986699	0.784825	0.911223	0.406425	0.32044	0.960511	0.853625	0.761052	0.997968	0.9385	0.980849	0.770995	0.741575	SMED30026315	Asxlregen_comp555799_c0_seq1	Asxlregen	360	smed001080	1	1	.	0	Q96DM1	8e-21	PiggyBac transposable element-derived protein 4	XP_004711537.1	5e-33	spermatogenesis-associated serine-rich protein 2 [Echinops telfairi]
SMED30002599	0.290934	0.410189	-0.0975868	0.216172	0.703221	-0.262779	0.481647	0.260273	0.290934		0	0	0	0	0	0	0	0	0.412542	0.239414	0.795147	0.550824	0.0373387	0.500166	0.167316	0.46344	0.844312	0.597609	0.926054	0.86573	0.265272	0.829895	0.554904	0.828508	SMED30002599	OX_Smed_1.0.04896	Oxford	741	NA	NA	.	.	.	.	.	.	.	.	.
SMED30006276	0.049767	0.12246	0.163322	0.0872929	0.00619151	0.154625	0.105699	0.0494943	0.049767		0	0	0	0	0	0	0	0	0.565335	0.155004	0.0560694	0.314012	0.943775	0.0720148	0.223112	0.566833	0.90488	0.493989	0.257288	0.72952	0.986631	0.400753	0.62348	0.876425	SMED30006276	AsxlX1_comp59516_c0_seq1	AsxlX1	1062	SMEDS2F2_0000083	3	1	.	0	Q9QZH3	2e-123	Peptidyl-prolyl cis-trans isomerase E	CDJ11114.1	1e-127	peptidyl prolyl cis trans isomerase E [Hymenolepis microstoma]
SMED30001043	-0.0641809	-0.237769	-0.317299	-0.499206	-0.0630207	-0.109034	-0.313955	-0.364406	-0.0641809		0	0	0	0	0	0	0	0	0.454212	0.00565927	0.000224449	7.39312e-09	0.462885	0.203849	0.000265192	2.29903e-05	0.856149	0.0799891	0.00581882	9.02231e-07	0.800325	0.606095	0.0120809	0.00207889	SMED30001043	AsxlWT_comp42577_c0_seq1	AsxlWT	500	smed26819	7	1	YES	0	.	.	.	.	.	.
SMED30032121	-0.459395	-0.125088	0.0460431	-0.151116	-0.28441	0.207483	-0.46542	-0.333566	-0.459395		0	0	0	0	0	0	0	0	0.131141	0.663445	0.867938	0.603575	0.344313	0.445321	0.132517	0.259867	0.62314	0.881233	0.953224	0.886456	0.71972	0.79872	0.500542	0.695255	SMED30032121	AsxlX1_comp66042_c0_seq2	AsxlX1	1108	sm_223468	0	1	.	0	.	.	.	.	.	.
SMED30033165	0.635816	-0.179641	0.836683	0.245988	0.452341	0.525893	0.579716	-0.454554	0.635816		0	0	0	0	0	0	0	0	0.312204	0.803353	0.166769	0.716495	0.493173	0.413659	0.367977	0.544108	0.785001	0.937043	0.463886	0.927059	0.818121	0.78318	0.743528	0.865244	SMED30033165	dd_smedV4_98207_0_1	Dresden	400	NA	NA	1	.	2	P26591	5e-13	Glutamate receptor	CAB65182.1	4e-14	glutamate receptor [Doryteuthis opalescens]
SMED30014896	0.0732443	0.159592	0.244554	0.0563192	0.0150557	0.0168467	0.0547596	-0.0566801	0.0732443		0	0	0	0	0	0	0	0	0.359101	0.0444209	0.0018798	0.483082	0.852462	0.833935	0.496339	0.481714	0.81283	0.269189	0.0278546	0.838687	0.960285	0.959768	0.821196	0.834591	SMED30014896	berlin_CUFF.105786.1	Berlin	362	SMEDS2F2_0001207	0	1	.	0	A1XQR9	2e-37	Small nuclear ribonucleoprotein E	NP_001279432.1	5e-36	small nuclear ribonucleoprotein polypeptide E [Callorhinchus milii]
SMED30008712	0.295997	0.461913	0.038891	0.714315	-0.162152	0.65206	0.0975654	-0.225402	0.295997		0	0	0	0	0	0	0	0	0.413219	0.19019	0.917449	0.0361879	0.682915	0.0570924	0.796751	0.565342	0.844702	0.54141	0.972691	0.277851	0.905362	0.359637	0.944636	0.875648	SMED30008712	AsxlX1_comp73854_c0_seq1	AsxlX1	2334	NA	NA	1	.	0	A4IFA3	2e-29	General transcription factor II-I repeat domain-containing protein 2	XP_008333556.1	4e-35	LOW QUALITY PROTEIN: general transcription factor II-I repeat domain-containing protein 2-like [Cynoglossus semilaevis]
SMED30020846	0.0315574	0.0474167	0.240582	0.314538	0.133772	0.195397	0.316505	0.286858	0.0315574		0	0	0	0	0	0	0	0	0.712938	0.580198	0.00442139	0.00020089	0.11892	0.0215345	0.000186369	0.000670371	0.949194	0.838861	0.0500755	0.00636172	0.464193	0.221266	0.00949911	0.027233	SMED30020846	OX_Smed_1.0.15264	Oxford	293	isotig11926	0	.	.	.	.	.	.	.	.	.
SMED30010026	0.32616	-0.17258	-0.0979301	-0.664773	0.0174421	0.413194	-0.0101673	0.231088	0.32616		0	0	0	0	0	0	0	0	0.355048	0.641409	0.789023	0.0911851	0.961736	0.238591	0.977951	0.513971	0.810809	0.869315	0.923733	0.442078	0.990744	0.646573	0.994534	0.852448	SMED30010026	Sxlregen_comp64717_c0_seq1	Sxlregen	2194	SMEDS2F2_0003165	1	1	.	0	Q5SVZ6	0.0004	Zinc finger MYM-type protein 1 [Homo sapiens]	XP_004227401.1	2e-07	zinc finger MYM-type protein 1-like [Ciona intestinalis]
SMED30017321	-0.134158	-0.209223	-0.233469	-0.146855	-0.0853569	-0.0811199	-0.0916016	-0.152751	-0.134158		0	0	0	0	0	0	0	0	0.0692399	0.00487944	0.0016526	0.047938	0.249999	0.270846	0.216	0.0385436	0.517464	0.0720894	0.0254686	0.322222	0.633187	0.676181	0.614125	0.321421	SMED30017321	AsxlWT_comp48953_c0_seq1	AsxlWT	921	SMEDS2F2_0001683	7	1	.	0	A6QQL5	6e-12	Uncharacterized protein C2orf73 homolog	EKC29750.1	6e-25	Uncharacterized protein C2orf73-like protein [Crassostrea gigas]
SMED30020957	-0.0120615	-0.0987343	-0.107257	-0.0420267	-0.0431228	-0.213507	-0.0872311	-0.198381	-0.0120615		0	0	0	0	0	0	0	0	0.866834	0.173297	0.137927	0.561838	0.553661	0.00357448	0.231166	0.00650823	0.977989	0.520289	0.419653	0.870219	0.847769	0.0779299	0.63159	0.123119	SMED30020957	AsxlWT_comp37712_c0_seq1	AsxlWT	1235	SMEDS2F2_0000208	1	1	.	0	P43332	4e-05	U1 small nuclear ribonucleoprotein A	CDJ21389.1	5e-08	u2 small nuclear ribonucleoprotein B'' [Echinococcus granulosus]
SMED30020674	0.749701	0.75794	0.718638	0.254364	0.457451	0.653757	0.64622	0.541062	0.749701		0	0	0	0	0	0	0	0	0.0864585	0.0830596	0.1003	0.596575	0.328324	0.142986	0.15222	0.230323	0.549292	0.369949	0.352505	0.883215	0.709175	0.531297	0.534071	0.671783	SMED30020674	berlin_CUFF.262204.1	Berlin	352	NA	NA	.	.	.	P0CH11	9e-29	Ubiquitin-60S ribosomal protein L40	XP_006153239.1	3e-28	polyubiquitin-B [Tupaia chinensis]
SMED30025988	-0.184119	-0.251873	-0.325884	-0.209597	-0.124339	-0.136521	-0.162824	-0.12546	-0.184119		0	0	0	0	0	0	0	0	0.0518809	0.00853793	0.000701152	0.0286742	0.192272	0.148107	0.088373	0.18006	0.467534	0.104109	0.0134858	0.244831	0.572186	0.537687	0.415805	0.615885	SMED30025988	Sxlregen_comp17326_c0_seq1	Sxlregen	1545	SMEDS2F2_0002229	0	1	.	2	.	.	.	.	.	.
SMED30028542	0.0989292	0.149258	0.0470409	-0.00116073	0.391748	0.162188	0.169166	0.123656	0.0989292		0	0	0	0	0	0	0	0	0.200464	0.0526891	0.543212	0.988158	2.84485e-07	0.0352567	0.0286949	0.108345	0.696624	0.293618	0.799244	0.99806	7.17691e-05	0.28445	0.240763	0.512384	SMED30028542	SRG12_11549_c0s1	SRG12	735	NA	NA	1	.	1	.	.	.	EHK21992.1	0.0002	hypothetical protein TRIVIDRAFT_222554 [Trichoderma virens Gv29-8]
SMED30023463	0.356663	0.460122	0.358139	0.254973	0.164124	0.400413	0.417215	0.183101	0.356663		0	0	0	0	0	0	0	0	0.000366952	3.52607e-06	0.000330734	0.012139	0.111659	6.09406e-05	3.1702e-05	0.0714895	0.0313973	0.000248489	0.00780579	0.145073	0.45122	0.00473963	0.00265845	0.429586	SMED30023463	OX_Smed_1.0.00151	Oxford	1137	sm_622677	0	.	.	.	.	.	.	.	.	.
SMED30019727	0.0237832	0.100602	0.0697249	0.0875873	0.0616825	0.0409752	0.12987	0.0807948	0.0237832		0	0	0	0	0	0	0	0	0.637318	0.0456437	0.16576	0.0825249	0.222843	0.416734	0.00997667	0.108382	0.922179	0.272971	0.462351	0.423322	0.608119	0.784156	0.1353	0.512478	SMED30019727	AsxlWT_comp58512_c0_seq1	AsxlWT	2502	KG_BCAT-2	6	1	.	0	Q29I35	1e-95	Armadillo segment polarity protein	ABW79874.1	0	beta-catenin-like protein 2 [Schmidtea mediterranea]
SMED30019148	-0.120052	-0.0101514	-0.0562786	0.0601707	0.045417	0.0993914	0.00298171	-0.0398684	-0.120052		0	0	0	0	0	0	0	0	0.376317	0.939678	0.674917	0.653021	0.735983	0.453717	0.982397	0.76616	0.824387	0.983889	0.870721	0.904928	0.923982	0.803745	0.995576	0.943636	SMED30019148	OX_Smed_1.0.13390	Oxford	2000	sm_rc_89936	0	.	.	.	.	.	.	.	.	.
SMED30027942	0.165651	0.195708	0.0954741	0.0549242	-0.0909147	-0.0679428	0.0838405	-0.132125	0.165651		0	0	0	0	0	0	0	0	0.10957	0.0586924	0.356444	0.596162	0.381393	0.51244	0.418542	0.202924	0.591959	0.309443	0.665408	0.883215	0.743831	0.836854	0.776966	0.642791	SMED30027942	OX_Smed_1.0.18225	Oxford	684	SMEDS2F2_0001604	0	.	.	.	.	.	.	.	.	.
SMED30005902	-0.425146	-0.41915	0.219032	-0.211489	-0.279492	0.10783	-0.070233	-0.452388	-0.425146		0	0	0	0	0	0	0	0	0.294688	0.301689	0.551027	0.593215	0.488122	0.774369	0.856963	0.264686	0.77495	0.659988	0.80553	0.881542	0.816464	0.942131	0.964638	0.699793	SMED30005902	AsxlX1_comp70248_c0_seq3	AsxlX1	840	SMEDS2F2_0000142	3	1	.	0	Q9NFZ6	2e-154	Tubulin beta-2 chain	AFM74199.1	2e-155	beta-tubulin [Spirometra erinaceieuropaei]
SMED30003111	-0.436062	-0.668939	-0.707813	-0.544371	-0.497813	-0.414247	-0.0896984	-0.257667	-0.436062		0	0	0	0	0	0	0	0	0.287549	0.117753	0.0974693	0.196943	0.238703	0.312624	0.818958	0.514568	0.769692	0.437758	0.346959	0.617258	0.622923	0.712813	0.951836	0.852466	SMED30003111	uniq_sm_501331	033226_uniq	419	sm_501331	0	.	.	.	.	.	.	.	.	.
SMED30017093	-0.620123	-0.225089	0.0417053	-0.18668	-0.772571	-0.599452	-0.789358	0.175736	-0.620123		0	0	0	0	0	0	0	0	0.357662	0.721737	0.944566	0.768017	0.273426	0.374391	0.26267	0.764557	0.812	0.907257	0.98234	0.941923	0.655384	0.75791	0.662734	0.943636	SMED30017093	uniq_sm_654550	033226_uniq	486	sm_654550	0	.	.	.	.	.	.	.	.	.
SMED30029078	-0.0162398	0.112052	-0.112101	-0.0217451	0.0480875	0.0943755	-0.0767795	0.0540768	-0.0162398		0	0	0	0	0	0	0	0	0.847968	0.179493	0.189143	0.798883	0.572294	0.260009	0.37341	0.518184	0.975417	0.526843	0.493385	0.949579	0.858026	0.666758	0.747007	0.854043	SMED30029078	Sxlembryo_comp62237_c0_seq1	Sxlembryo	3003	SMEDS2F2_0001865	0	1	.	0	.	.	.	.	.	.
SMED30035755	-0.0711376	-0.271912	-0.22458	-0.0355192	-0.225122	-0.00455539	-0.155575	-0.0630196	-0.0711376		0	0	0	0	0	0	0	0	0.450091	0.00465222	0.0184035	0.706725	0.0198122	0.961275	0.103948	0.502438	0.855417	0.0699021	0.129298	0.924397	0.19033	0.991444	0.448639	0.845357	SMED30035755	AsxlWT_comp18019_c0_seq1	AsxlWT	322	rc_smed003388	5	1	.	0	.	.	.	.	.	.
SMED30024289	-0.273067	-0.302213	-0.170222	-0.0728822	0.0127621	0.255168	0.241843	0.0320905	-0.273067	8	0	0	0	0	0	0	0	0	0.0681759	0.0444414	0.248826	0.621096	0.930912	0.072837	0.0913924	0.824459	0.514212	0.269236	0.561452	0.892305	0.983382	0.401974	0.422844	0.959799	SMED30024289	AsxlWT_comp33290_c0_seq1	AsxlWT	609	SMEDS2F2_0001931	3	1	.	0	.	.	.	.	.	.
SMED30009712	0.0145586	-0.0994391	-0.116285	-0.0118281	0.027262	-0.00397395	-0.0834598	0.0419415	0.0145586		0	0	0	0	0	0	0	0	0.781695	0.0597151	0.0275175	0.822503	0.605308	0.939806	0.114938	0.423876	0.96505	0.31207	0.16716	0.956216	0.871807	0.986535	0.469526	0.807077	SMED30009712	AsxlWT_comp61142_c1_seq2	AsxlWT	4149	JCR.EgfRA	0	1	.	2	P04412	6e-142	Epidermal growth factor receptor	AEE89453.1	0	epidermal growth factor receptor 1 [Schmidtea mediterranea]
SMED30010144	0.0212754	0.0948235	0.0239985	0.0262792	-0.0625342	0.0191224	0.0156022	-0.0335271	0.0212754		0	0	0	0	0	0	0	0	0.707144	0.0924787	0.67092	0.644023	0.277298	0.736122	0.784416	0.554934	0.947359	0.389985	0.867701	0.900984	0.659385	0.928262	0.939702	0.871098	SMED30010144	AsxlX1_comp74781_c0_seq4	AsxlX1	1958	SMEDS2F2_0001033	3	1	.	4	.	.	.	ESO83214.1	7e-18	hypothetical protein LOTGIDRAFT_96575, partial [Lottia gigantea]
SMED30002410	-0.0655144	-0.00489367	-0.122527	-0.0456985	-0.0941878	0.0351448	-0.055615	0.0796335	-0.0655144		0	0	0	0	0	0	0	0	0.514665	0.961059	0.22362	0.650153	0.352545	0.725517	0.581704	0.424306	0.884721	0.990428	0.533736	0.903645	0.7258	0.924048	0.862237	0.80728	SMED30002410	AsxlWT_comp63127_c0_seq12	AsxlWT	1337	SMEDS2F2_0000419	2	2	.	0	Q4R6P1	3e-06	Protein FAM200A	CAX74585.1	1e-13	Myophilin [Schistosoma japonicum]
SMED30014766	0.341385	-0.455218	-0.116435	-0.310309	-0.132839	0.105356	0.231695	0.273837	0.341385	1	0	0	0	0	0	0	0	0	0.0853942	0.0410357	0.580514	0.157563	0.537795	0.60858	0.255386	0.170219	0.548955	0.257619	0.826222	0.564298	0.841356	0.87896	0.655663	0.603249	SMED30014766	SxlWT_comp338997_c0_seq1	SxlWT	552	NA	NA	1	.	0	.	.	.	.	.	.
SMED30035362	0.303998	0.111161	0.272069	0.891242	0.650453	0.325062	-0.328189	-0.153934	0.303998		0	0	0	0	0	0	0	0	0.575202	0.842528	0.615794	0.0747014	0.212813	0.549093	0.588681	0.790392	0.906702	0.950973	0.841107	0.401111	0.597146	0.855395	0.865592	0.950681	SMED30035362	AsxlWT_comp33884_c0_seq1	AsxlWT	513	smed021417	0	1	.	0	.	.	.	.	.	.
SMED30014566	0.132053	0.0050736	0.300462	0.263305	0.254038	0.310646	0.0682592	0.377661	0.132053		0	0	0	0	0	0	0	0	0.780629	0.991556	0.519352	0.576286	0.59112	0.50661	0.88681	0.415629	0.96505	0.998264	0.783346	0.87523	0.865898	0.83391	0.972425	0.802829	SMED30014566	Sxlregen_comp20181_c1_seq1	Sxlregen	1428	NA	NA	1	.	0	.	.	.	.	.	.
SMED30003671	-0.323391	-0.315261	-0.860412	-0.387231	0.571567	0.49829	0.356248	0.103376	-0.323391		0	0	0	0	0	0	0	0	0.51719	0.527873	0.113671	0.447398	0.189249	0.252133	0.429107	0.822772	0.885983	0.814534	0.378227	0.816971	0.56793	0.660459	0.784996	0.959799	SMED30003671	uniq_smed26211	033226_uniq	525	smed26211	0	.	.	.	.	.	.	.	.	.
SMED30030454	0.2856	0.294023	0.478278	0.49492	0.520645	0.446437	0.314437	0.328247	0.2856		0	0	0	0	0	0	0	0	0.284776	0.270836	0.062438	0.0566162	0.0458018	0.086699	0.243288	0.213163	0.769692	0.628777	0.272898	0.347827	0.297206	0.433175	0.643957	0.653327	SMED30030454	berlin_CUFF.194927.1	Berlin	472	NA	NA	.	.	.	.	.	.	.	.	.
SMED30017181	-0.0209266	0.0349369	0.0714675	-0.0261647	-0.0930659	0.0468064	0.0167186	0.0208327	-0.0209266		0	0	0	0	0	0	0	0	0.723761	0.553586	0.222348	0.660337	0.122217	0.427317	0.77848	0.723484	0.951982	0.828393	0.532579	0.907182	0.470784	0.788183	0.938332	0.930893	SMED30017181	AsxlWT_comp53285_c0_seq1	AsxlWT	1877	SMEDS2F2_0002499	2	3	.	0	Q3ZBI6	2e-29	Four and a half LIM domains protein 3	CDJ18899.1	1e-72	Four and a half LIM domains protein 2 [Echinococcus granulosus]
SMED30005195	-0.341598	-0.333432	-0.844398	-0.434555	-0.463893	-0.0734908	-0.264607	-0.304112	-0.341598		0	0	0	0	0	0	0	0	0.389602	0.401129	0.0498155	0.286154	0.261857	0.84687	0.505923	0.438238	0.83277	0.738987	0.240725	0.707805	0.645162	0.962983	0.825868	0.817088	SMED30005195	Sxlregen_comp45451_c0_seq1	Sxlregen	1377	NA	NA	2	.	0	.	.	.	XP_008190256.1	1e-54	zinc finger MYM-type protein 1-like [Acyrthosiphon pisum]
SMED30006340	0.0151156	0.0629344	0.149167	0.0237781	0.0989641	0.0177135	0.12389	-0.0579015	0.0151156		0	0	0	0	0	0	0	0	0.813686	0.324764	0.0182047	0.712104	0.123904	0.7828	0.0527909	0.36887	0.970761	0.679898	0.128533	0.92609	0.474737	0.943737	0.326463	0.777993	SMED30006340	AsxlWT_comp52371_c0_seq2	AsxlWT	1070	SMEDS2F2_0000102	2	1	.	0	P23610	2e-08	Factor VIII intron 22 protein	ELT92152.1	2e-31	hypothetical protein CAPTEDRAFT_164298 [Capitella teleta]
SMED30006786	-2.51907	-0.58524	-1.16693	-1.09981	-0.352331	-0.175394	-0.119886	-0.47618	-2.51907		-1	0	0	0	0	0	0	0	0.00192827	0.332426	0.0749654	0.0947003	0.552001	0.757993	0.833394	0.419826	0.0920327	0.685911	0.300995	0.450637	0.84696	0.935874	0.955639	0.805959	SMED30006786	SxlWT_comp72233_c0_seq1	SxlWT	827	NA	NA	1	.	0	Q9C7A2	2e-09	Ankyrin repeat-containing protein At3g12360 [Arabidopsis thaliana]	2XEE	3e-17	Chain A, Structural Determinants For Improved Thermal Stability Of Designed Ankyrin Repeat Proteins With A Redesigned C- Capping Module.
SMED30007934	-0.00866492	-0.114299	0.158203	0.0214919	0.0495151	-0.119624	0.159399	0.0267896	-0.00866492		0	0	0	0	0	0	0	0	0.949842	0.414725	0.236337	0.876363	0.720937	0.394792	0.240877	0.844192	0.993388	0.747136	0.549836	0.971327	0.918605	0.771241	0.642483	0.963855	SMED30007934	AsxlX1_comp76385_c0_seq1	AsxlX1	2817	HM055595	5	1	.	0	Q6PFQ2	4e-156	Eukaryotic translation initiation factor 3 subunit C	ADK78220.1	0	eukaryotic translation initiation factor 3 subunit C [Schmidtea mediterranea]
SMED30015043	0.124417	0.0468916	0.0420861	-0.0672306	-0.0164024	0.12032	0.199829	0.045398	0.124417		0	0	0	0	0	0	0	0	0.212287	0.641266	0.674571	0.511279	0.872746	0.228906	0.0452227	0.650536	0.710577	0.869315	0.870388	0.853602	0.967346	0.635199	0.30284	0.904293	SMED30015043	AsxlWT_comp34675_c0_seq2	AsxlWT	540	SMEDS2F2_0001837	1	1	.	0	.	.	.	.	.	.
SMED30031467	0.100292	-0.0441183	0.00253211	0.0055649	-0.0719576	0.132971	0.146497	0.195145	0.100292		0	0	0	0	0	0	0	0	0.622116	0.831615	0.99018	0.978684	0.732942	0.512895	0.473618	0.330109	0.916809	0.947526	0.996765	0.995542	0.923014	0.836854	0.810633	0.750262	SMED30031467	Sxlregen_comp27164_c0_seq1	Sxlregen	2153	NA	NA	1	.	0	.	.	.	XP_005863307.1	3e-33	tigger transposable element-derived protein 1-like [Myotis brandtii]
SMED30001433	0.0401653	-0.0176527	-0.00663389	-0.0357334	0.0374043	-0.0829345	-0.0653051	-0.0492587	0.0401653		0	0	0	0	0	0	0	0	0.503616	0.770972	0.912213	0.559249	0.539689	0.176292	0.289952	0.416201	0.881621	0.926275	0.970338	0.869195	0.841832	0.575392	0.685675	0.803217	SMED30001433	AsxlWT_comp41970_c0_seq1	AsxlWT	1485	SMEDS2F2_0001340	1	1	.	0	A0AUR5	3e-89	Protein FAM188A	CCD78391.1	2e-106	hypothetical protein Smp_181460 [Schistosoma mansoni]
SMED30000514	-0.0510835	-0.141063	-0.199518	-0.175692	-0.00397157	-0.120686	-0.140036	-0.152448	-0.0510835		0	0	0	0	0	0	0	0	0.466799	0.0463924	0.00491102	0.0137959	0.955119	0.0881795	0.0494944	0.0310507	0.863375	0.27464	0.053926	0.15694	0.989129	0.435843	0.316535	0.290306	SMED30000514	AsxlX1_comp78577_c0_seq1	AsxlX1	3832	SMEDS2F2_0000553	0	3	.	0	.	.	.	EUB64847.1	2e-07	hypothetical protein EGR_00116 [Echinococcus granulosus]
SMED30018409	0.0448271	-0.575566	-0.16612	0.0863217	-0.253197	0.372801	1.08018	-0.607173	0.0448271		0	0	0	0	0	0	0	0	0.9486	0.44947	0.814854	0.900817	0.730821	0.573256	0.0725627	0.424141	0.993064	0.763822	0.933788	0.974974	0.921871	0.864882	0.378721	0.807077	SMED30018409	uniq_AAA.454ESTABI.19817	033226_uniq	462	AAA.454ESTABI.19	0	.	.	.	.	.	.	.	.	.
SMED30017246	-0.0845977	-0.223729	-0.177375	-0.0992721	-0.109023	-0.018837	-0.0519306	-0.00348824	-0.0845977		0	0	0	0	0	0	0	0	0.314622	0.00835713	0.0356204	0.239883	0.198369	0.822406	0.538085	0.966742	0.786247	0.102781	0.196249	0.661544	0.578937	0.955748	0.84134	0.992088	SMED30017246	Sxlembryo_comp96419_c1_seq2	Sxlembryo	4124	SMEDS2F2_0002864	0	1	.	0	Q52KG5	6e-45	Kinesin-like protein KIF26A [Mus musculus]	XP_006812600.1	1e-48	kinesin-like protein KIF26B-like [Saccoglossus kowalevskii]
SMED30008050	-0.140424	-0.130238	-0.232681	-0.0352751	-0.0299345	-0.210975	-0.430528	-0.368198	-0.140424		0	0	0	0	0	0	0	0	0.299639	0.33636	0.0866107	0.794002	0.825107	0.12094	0.0018374	0.00715415	0.778829	0.687987	0.325486	0.948266	0.952518	0.496255	0.0462052	0.130253	SMED30008050	AsxlWT_comp49775_c0_seq1	AsxlWT	1770	SMEDS2F2_0000681	30	1	.	0	.	.	.	AFJ24792.1	3e-14	TNF receptor associated factor-2, partial [Schmidtea mediterranea]
SMED30031548	-0.000122187	0.0649425	0.0759648	0.04169	-0.0221214	0.0402736	0.0159549	0.0195198	-0.000122187		0	0	0	0	0	0	0	0	0.998698	0.383209	0.305771	0.577682	0.769815	0.589761	0.831948	0.793476	0.999797	0.725459	0.618235	0.875978	0.934546	0.870147	0.955619	0.952254	SMED30031548	AsxlWT_comp55705_c1_seq4	AsxlWT	1165	smed001458	0	1	.	0	.	.	.	CCD80326.1	3e-32	putative 50s ribosomal protein L1 [Schistosoma mansoni]
SMED30026341	0.147187	0.24567	0.198021	0.207855	0.160764	0.138826	0.103746	0.0846682	0.147187		0	0	0	0	0	0	0	0	0.0079231	8.76941e-06	0.000339273	0.000177348	0.00387543	0.01236	0.0625044	0.127284	0.202444	0.000536139	0.00795727	0.00573106	0.0737314	0.164739	0.354607	0.54132	SMED30026341	AsxlWT_comp38273_c0_seq1	AsxlWT	889	SMEDS2F2_0001155	2	1	.	0	.	.	.	.	.	.
SMED30027299	0.0617325	0.0322511	0.0416002	-0.00719974	0.0790217	0.0229039	0.0465219	-0.00122664	0.0617325		0	0	0	0	0	0	0	0	0.202186	0.505901	0.389873	0.882328	0.103873	0.636853	0.338244	0.979815	0.699109	0.802772	0.692896	0.972973	0.438465	0.891867	0.728975	0.996241	SMED30027299	AsxlWT_comp53317_c0_seq1	AsxlWT	1524	SMEDS2F2_0001315	3	1	.	0	Q7PMT1	3e-134	Homeobox protein extradenticle [Anopheles gambiae]	AGH32779.1	0	PBX [Schmidtea mediterranea]
SMED30004824	-0.226465	0.0586934	0.0415141	0.261024	-0.0322725	0.0518544	-0.0718198	0.122737	-0.226465		0	0	0	0	0	0	0	0	0.407953	0.82313	0.873976	0.309304	0.904913	0.843942	0.79088	0.635242	0.840644	0.943881	0.955135	0.724588	0.976701	0.962438	0.941996	0.897144	SMED30004824	dd_smedV4_25334_0_1	Dresden	687	sm_rc_638778	0	1	YES	0	.	.	.	.	.	.
SMED30028681	-0.121941	-0.117047	-0.146344	-0.114123	-0.0605322	-0.04313	-0.0843603	-0.0756615	-0.121941		0	0	0	0	0	0	0	0	0.163543	0.181211	0.0943866	0.193299	0.48999	0.621317	0.336019	0.386005	0.665313	0.529413	0.341518	0.612324	0.816896	0.88503	0.727036	0.786548	SMED30028681	AsxlX1_comp78239_c0_seq1	AsxlX1	3271	SMEDS2F2_0001426	1	1	.	0	Q8TC21	9e-16	Zinc finger protein 596 [Homo sapiens]	CCD82734.1	3e-27	putative zinc finger protein [Schistosoma mansoni]
SMED30013531	0.0177139	0.366598	-1.10882	-0.678589	0.10787	-0.409318	0.577338	0.17116	0.0177139		0	0	0	0	0	0	0	0	0.980015	0.586059	0.188742	0.396976	0.879571	0.591985	0.380827	0.804014	0.997801	0.841782	0.492843	0.785812	0.969013	0.870882	0.752207	0.9551	SMED30013531	uniq_SMEDS2F2_00031645-RA	033226_uniq	252	SMEDS2F2_0003164	0	1	YES	1	.	.	.	AHD24756.1	0.0007	X1.D.A5.1 [Schmidtea mediterranea]
SMED30021287	-0.015447	0.077936	0.0876555	0.123737	0.130042	0.0627105	0.0535214	0.0155179	-0.015447		0	0	0	0	0	0	0	0	0.787221	0.171118	0.122506	0.029774	0.0228365	0.2715	0.350036	0.785657	0.966211	0.51775	0.393844	0.250728	0.204649	0.676963	0.738017	0.94952	SMED30021287	AsxlX1_comp79287_c0_seq1	AsxlX1	839	SMEDS2F2_0000269	2	1	.	0	Q5TM62	5e-22	28S ribosomal protein S18b, mitochondrial	CDJ10809.1	2e-41	28S ribosomal protein S18b, mitochondrial [Hymenolepis microstoma]
SMED30016177	1.10593	0.545689	0.293019	0.936964	0.903366	-0.0513489	0.61371	1.07789	1.10593		0	0	0	0	0	0	0	0	0.0280788	0.325304	0.610284	0.0729946	0.088276	0.9335	0.269016	0.0323352	0.362249	0.680176	0.840208	0.395996	0.403492	0.985282	0.66771	0.296949	SMED30016177	berlin_isotig17496	Berlin	584	isotig17496	0	.	.	.	.	.	.	.	.	.
SMED30007724	-0.115905	-0.107586	-0.0904408	-0.0670848	-0.205278	0.500984	0.126941	-0.144392	-0.115905		0	0	0	0	0	0	0	0	0.603835	0.630093	0.682451	0.764078	0.374583	0.0127727	0.558872	0.517853	0.911055	0.864332	0.874512	0.941362	0.740655	0.167959	0.850031	0.853898	SMED30007724	Asxlsort_comp66014_c0_seq1	Asxlsort	1698	rc_smed021156	0	2	.	0	.	.	.	XP_002168116.2	2e-05	digestive organ expansion factor homolog [Hydra vulgaris]
SMED30022303	-0.270218	-0.0807809	-0.279426	-0.50883	-0.456334	-0.154704	-0.727671	-0.695887	-0.270218		0	0	0	0	0	0	-1	-1	0.257246	0.729177	0.240303	0.0398161	0.0654827	0.511791	0.00448846	0.00561136	0.748758	0.910632	0.553697	0.291186	0.351799	0.836551	0.0813697	0.112984	SMED30022303	uniq_smed017634	033226_uniq	333	smed017634	0	.	.	.	.	.	.	.	.	.
SMED30012201	0.505716	-0.0507495	-0.474038	-0.504369	-0.312448	-0.238372	-0.627103	-0.183279	0.505716	2	0	0	0	0	0	0	0	0	0.0311111	0.839692	0.0717992	0.0595649	0.233814	0.354087	0.0216999	0.470892	0.380351	0.949513	0.294394	0.356722	0.619043	0.743647	0.208924	0.830527	SMED30012201	OX_Smed_1.0.16264	Oxford	552	smed27464	3	.	.	.	.	.	.	.	.	.
SMED30029445	-0.0222817	0.118224	0.351089	0.473901	0.359934	0.0786317	0.205907	0.243421	-0.0222817		0	0	0	0	0	0	0	0	0.933265	0.651376	0.165084	0.0597797	0.161339	0.765342	0.430387	0.342205	0.989415	0.874979	0.461013	0.357713	0.529119	0.93848	0.786263	0.758874	SMED30029445	OX_Smed_1.0.09029	Oxford	569	NA	NA	.	.	.	.	.	.	.	.	.
SMED30008527	0.0997415	0.115648	0.210102	0.0835137	0.0194971	0.256096	0.0115157	0.111972	0.0997415		0	0	0	0	0	0	0	0	0.543188	0.480328	0.190752	0.614595	0.907966	0.11121	0.945451	0.492296	0.895962	0.786899	0.494822	0.889834	0.977301	0.479764	0.98659	0.840694	SMED30008527	uniq_sm_568320	033226_uniq	910	sm_568320	0	.	.	.	.	.	.	.	.	.
SMED30032377	0.0183029	-0.215781	-0.0454736	0.00191252	0.114854	0.220202	0.233508	-0.330083	0.0183029		0	0	0	0	0	0	0	0	0.929695	0.318958	0.827401	0.992731	0.580222	0.27334	0.249189	0.132384	0.988866	0.673742	0.938791	0.999679	0.861542	0.679343	0.650386	0.549164	SMED30032377	AsxlWT_comp44718_c0_seq1	AsxlWT	719	SMEDS2F2_0001196	4	1	.	1	.	.	.	CCD77637.1	4e-07	hypothetical protein Smp_156730 [Schistosoma mansoni]
SMED30033105	0.0910771	0.170376	0.209998	0.0272152	-0.173714	0.0476316	-0.00915634	-0.0627072	0.0910771		0	0	0	0	0	0	0	0	0.298262	0.0501605	0.0149829	0.758619	0.0559616	0.588718	0.918172	0.47925	0.77723	0.285906	0.113671	0.940532	0.326051	0.86983	0.980401	0.833057	SMED30033105	AsxlWT_comp51810_c0_seq2	AsxlWT	900	SMEDS2F2_0000580	0	1	.	4	Q9VPT7	3e-06	Post-GPI attachment to proteins factor 2	XP_008204605.1	1e-09	post-GPI attachment to proteins factor 2 [Nasonia vitripennis]
SMED30008189	-0.0949121	0.0276487	-0.181318	0.191479	-0.221079	-0.186332	-0.161895	-0.122502	-0.0949121		0	0	0	0	0	0	0	0	0.660769	0.896613	0.405262	0.360977	0.322302	0.396381	0.46335	0.57117	0.929007	0.968489	0.705753	0.766287	0.704003	0.772607	0.805628	0.877301	SMED30008189	berlin_CUFF.176807.1	Berlin	693	NA	NA	.	.	.	.	.	.	EFX81466.1	1e-12	hypothetical protein DAPPUDRAFT_317650 [Daphnia pulex]
SMED30005557	-0.592777	-0.460423	-0.423531	-0.167669	-0.0886166	-0.614595	-0.277189	0.134162	-0.592777		0	0	0	0	0	0	0	0	0.0563068	0.130055	0.157906	0.565137	0.760026	0.0496383	0.353374	0.623314	0.480497	0.456506	0.450403	0.871646	0.932925	0.336918	0.740425	0.892052	SMED30005557	uniq_sm_555487	033226_uniq	321	sm_555487	0	.	.	.	.	.	.	.	.	.
SMED30032932	0.0153925	0.298838	0.0732535	0.17832	0.0854148	0.0507934	0.053764	0.0885067	0.0153925		0	0	0	0	0	0	0	0	0.934966	0.0963679	0.693148	0.335004	0.65257	0.78729	0.777362	0.632815	0.989415	0.39811	0.880655	0.749193	0.892791	0.944704	0.938019	0.896089	SMED30032932	Sxlembryo_comp99522_c0_seq19	Sxlembryo	1733	SMEDS2F2_0002364	3	1	.	0	Q9UHY1	3e-14	Nuclear receptor-binding protein [Homo sapiens] gi|75077199|sp|Q4R8X0.1|NRBP_MACFA RecName: Full=Nuclear receptor-binding protein [Macaca fascicularis]	EUB61486.1	2e-35	Cell division cycle protein [Echinococcus granulosus]
SMED30003280	0.0947487	0.101746	0.122932	0.147657	0.146988	0.157889	0.14012	0.0498163	0.0947487		0	0	0	0	0	0	0	0	0.16147	0.132752	0.0675685	0.0291535	0.0308548	0.0191274	0.0391244	0.462595	0.663224	0.460173	0.284898	0.247726	0.241222	0.209494	0.282685	0.828119	SMED30003280	AsxlWT_comp61097_c2_seq22	AsxlWT	1269	smed022443	0	1	.	0	.	.	.	.	.	.
SMED30025546	-0.185638	-0.445434	-0.363022	-0.172211	-0.0699632	-0.606937	0.258764	0.376921	-0.185638		0	0	0	0	0	0	0	0	0.577132	0.197712	0.285196	0.607125	0.83337	0.0872266	0.413983	0.22042	0.907128	0.550247	0.598649	0.888008	0.955036	0.434339	0.77468	0.660864	SMED30025546	uniq_sm_465258	033226_uniq	635	sm_465258	0	.	.	.	.	.	.	.	.	.
SMED30018891	0.577568	0.720739	0.545661	0.716997	0.721647	0.66273	0.519902	0.730347	0.577568	4	0	1	0	1	1	1	0	1	0.0190541	0.00282353	0.0267689	0.00316826	0.00318306	0.00661082	0.0386707	0.00233162	0.309136	0.0500061	0.164366	0.0573669	0.0653169	0.115408	0.281286	0.0643359	SMED30018891	uniq_smed016863	033226_uniq	1039	smed016863	0	1	.	0	.	.	.	.	.	.
SMED30018726	-0.0122092	0.187626	0.132295	-0.182992	-0.120863	0.20098	0.0915879	0.0771612	-0.0122092		0	0	0	0	0	0	0	0	0.892863	0.0328214	0.133194	0.0516267	0.197986	0.0222432	0.310657	0.385636	0.982002	0.227514	0.411677	0.332214	0.578605	0.224988	0.705997	0.786548	SMED30018726	AsxlWT_comp50287_c0_seq1	AsxlWT	755	NA	NA	1	.	0	.	.	.	.	.	.
SMED30030949	-0.064456	0.0583146	0.131548	0.362943	0.0916969	-0.171478	0.130195	0.184311	-0.064456		0	0	0	0	0	0	0	0	0.877055	0.886835	0.743947	0.356611	0.824893	0.687127	0.750946	0.644517	0.97952	0.964696	0.904951	0.763342	0.952518	0.912068	0.929173	0.901474	SMED30030949	Sxlregen_comp45099_c0_seq1	Sxlregen	816	SMEDS2F2_0002781	2	1	.	0	.	.	.	.	.	.
SMED30019494	0.0710856	0.114777	0.11957	0.010838	0.050216	0.0846031	0.113074	0.0586154	0.0710856		0	0	0	0	0	0	0	0	0.339511	0.122378	0.10643	0.885041	0.503613	0.255875	0.129607	0.430823	0.801904	0.444991	0.364284	0.973593	0.824011	0.664039	0.496102	0.812625	SMED30019494	AsxlWT_comp68940_c0_seq1	AsxlWT	750	SMEDS2F2_0000020	1	1	.	0	A7SM54	9e-99	Ubiquitin-fold modifier-conjugating enzyme 1	XP_005112697.1	3e-99	ubiquitin-fold modifier-conjugating enzyme 1-like [Aplysia californica]
SMED30019120	0.00706934	0.0409061	0.111169	0.0146553	-0.0158259	0.104727	0.00374994	0.036135	0.00706934		0	0	0	0	0	0	0	0	0.901488	0.472907	0.0489642	0.798302	0.784107	0.0649641	0.948027	0.525002	0.98402	0.781136	0.238025	0.949292	0.9385	0.383775	0.987602	0.857975	SMED30019120	AsxlWT_comp15294_c0_seq2	AsxlWT	1124	SMEDS2F2_0001528	3	1	.	0	.	.	.	CCD80826.1	2e-14	hypothetical protein Smp_009300 [Schistosoma mansoni]
SMED30000827	0.0112455	-0.0569801	-0.041727	-0.0802744	0.0610564	-0.0973704	-0.115877	-0.216149	0.0112455		0	0	0	0	0	0	0	0	0.877198	0.434127	0.566495	0.270896	0.401904	0.181602	0.112249	0.00306144	0.979591	0.754204	0.816699	0.693669	0.758741	0.581123	0.464164	0.0771037	SMED30000827	Asxlregen_comp57725_c0_seq1	Asxlregen	417	SMEDS2F2_0003342	0	1	.	1	.	.	.	.	.	.
SMED30015784	-0.416873	-0.451855	-0.528488	-0.531897	0.194794	-0.141954	-0.26247	-0.1284	-0.416873		0	0	0	0	0	0	0	0	0.204444	0.171683	0.111835	0.114945	0.522087	0.653628	0.419499	0.681899	0.701973	0.51826	0.374825	0.492614	0.831613	0.898675	0.777538	0.915831	SMED30015784	dd_smedV4_21835_0_1	Dresden	345	sm_rc_575549	10	1	.	0	P10394	1e-14	Retrovirus-related Pol polyprotein from transposon 412	XP_785151.3	6e-23	uncharacterized protein LOC579970 [Strongylocentrotus purpuratus]
SMED30013655	0.172271	0.180111	0.155668	0.128297	0.0288826	0.153585	0.161195	0.08497	0.172271		0	0	0	0	0	0	0	0	0.0345373	0.0271518	0.0557397	0.119366	0.730174	0.060599	0.0501189	0.300155	0.39894	0.20636	0.256336	0.50255	0.921793	0.370867	0.317776	0.72757	SMED30013655	AsxlWT_comp47014_c1_seq1	AsxlWT	789	SMEDS2F2_0001622	5	1	.	0	Q5HZ92	9e-36	Ceramide-1-phosphate transfer protein	CAX73460.1	6e-36	hypothetical protein [Schistosoma japonicum]
SMED30033813	-0.246414	0.0366705	-0.20425	-0.154885	-0.10696	-0.396103	-0.114875	-0.253567	-0.246414		0	0	0	0	0	0	0	0	0.132085	0.814061	0.205848	0.340585	0.510763	0.0188956	0.479045	0.119683	0.625842	0.940321	0.514196	0.751953	0.826659	0.207646	0.814311	0.530539	SMED30033813	AsxlX1_comp67337_c0_seq2	AsxlX1	1193	JCR.Brachyury	2	1	.	0	O43435	9e-68	T-box transcription factor TBX1	ADX36148.1	0	TBX1/10 [Schmidtea polychroa]
SMED30013300	0.0503545	-0.0375886	0.0565959	-0.0901566	0.0508089	-0.0907107	-0.123365	-0.18721	0.0503545		0	0	0	0	0	0	0	0	0.491973	0.608653	0.439583	0.22037	0.489132	0.21718	0.093918	0.0109807	0.874947	0.853292	0.732132	0.642178	0.81647	0.622669	0.428632	0.166323	SMED30013300	AsxlWT_comp48330_c0_seq3	AsxlWT	471	SMEDS2F2_0000721	1	1	.	2	Q06646	2e-23	ATP synthase F(0) complex subunit C2, mitochondrial	ACO12432.1	2e-24	ATP synthase lipid-binding protein, mitochondrial precursor [Lepeophtheirus salmonis]
SMED30024751	0.0889414	0.244121	0.398711	0.0993147	0.0325089	0.216348	0.0812044	0.271122	0.0889414		0	0	0	0	0	0	0	0	0.409803	0.0211056	0.000113195	0.360315	0.768189	0.0420831	0.457102	0.00981929	0.842052	0.179554	0.00342035	0.765606	0.934242	0.309617	0.803595	0.156136	SMED30024751	AsxlWT_comp55116_c0_seq1	AsxlWT	721	SMEDS2F2_0003307	1	2	YES	1	Q03412	3e-11	Innexin unc-7	EUB62349.1	3e-27	Innexin unc-7 [Echinococcus granulosus]
SMED30003065	-0.15328	-0.227377	-0.555865	-0.192243	-0.427797	-0.214752	0.219731	-0.550056	-0.15328		0	0	0	0	0	0	0	0	0.748673	0.639048	0.272767	0.692128	0.40041	0.657869	0.63112	0.277892	0.958389	0.868172	0.586386	0.918705	0.757975	0.900197	0.8847	0.710129	SMED30003065	SxlWT_comp44091_c0_seq1	SxlWT	608	NA	NA	1	.	0	.	.	.	.	.	.
SMED30011032	0.0347099	-1.23895	-0.620604	-0.843954	-0.789378	0.214773	0.271269	-0.907118	0.0347099		0	0	0	0	0	0	0	0	0.960864	0.14953	0.426039	0.301706	0.335011	0.757896	0.697649	0.264728	0.994946	0.485891	0.721841	0.717655	0.714505	0.935874	0.911949	0.699832	SMED30011032	uniq_sm_rc_417278	033226_uniq	436	sm_572082	0	.	.	.	.	.	.	.	.	.
SMED30007323	-0.0655758	-0.186762	-0.280556	-0.162639	0.0653045	-0.0630359	-0.190176	-0.0834819	-0.0655758		0	0	0	0	0	0	0	0	0.319172	0.00469548	2.23287e-05	0.0138702	0.320979	0.338517	0.00406356	0.204754	0.790601	0.0703058	0.000945456	0.157347	0.703006	0.732585	0.0762071	0.644737	SMED30007323	AsxlWT_comp61534_c0_seq1	AsxlWT	3666	SMEDS2F2_0000339	17	1	.	1	.	.	.	CCD78186.1	3e-14	hypothetical protein Smp_097090.1 [Schistosoma mansoni]
SMED30033336	0.163947	0.112722	0.0928009	-0.0830101	-0.529202	-0.133947	-0.126932	-0.29202	0.163947	2	0	0	0	0	-1	0	0	0	0.111186	0.273671	0.367317	0.421266	3.74422e-07	0.194478	0.219156	0.0047573	0.595947	0.632525	0.675672	0.802361	9.06493e-05	0.595737	0.61869	0.10146	SMED30033336	uniq_smed26768	033226_uniq	645	smed26768	0	.	.	.	Q6F473	7e-21	40S ribosomal protein S29	AAX30124.1	3e-21	ribosomal protein S29 [Schistosoma japonicum]
SMED30019824	-0.0583671	0.0255722	-0.211361	-0.188378	-0.0414696	0.0395265	0.132071	-0.126344	-0.0583671		0	0	0	0	0	0	0	0	0.751944	0.888401	0.262349	0.323273	0.824982	0.828309	0.466064	0.4967	0.958706	0.965315	0.576362	0.738799	0.952518	0.958142	0.806997	0.842121	SMED30019824	OX_Smed_1.0.09041	Oxford	564	sm_642470	3	.	.	.	.	.	.	.	.	.
SMED30009641	-0.280836	-0.442517	-0.485703	0.257648	-0.191285	0.0412101	-0.376871	-0.0793241	-0.280836		0	0	0	0	0	0	0	0	0.559121	0.369876	0.324593	0.565411	0.69161	0.928631	0.445857	0.864542	0.903121	0.715316	0.636485	0.871646	0.907435	0.984678	0.796257	0.968726	SMED30009641	uniq_sm_544659	033226_uniq	481	sm_544659	0	.	.	.	.	.	.	.	.	.
SMED30030807	-0.0485094	0.130089	0.0446948	-0.133276	-0.499325	-0.435773	-0.249937	-0.208276	-0.0485094		0	0	0	0	0	0	0	0	0.86439	0.638626	0.872615	0.6457	0.106519	0.149103	0.399125	0.471991	0.97769	0.868065	0.954464	0.901775	0.442291	0.539286	0.765778	0.830527	SMED30030807	AY066818.1	GenBank	864	NA	NA	.	.	.	.	.	.	ESO05382.1	8e-05	hypothetical protein HELRODRAFT_171773 [Helobdella robusta]
SMED30008757	-0.0280967	-0.112709	-0.091884	-0.100367	-0.0385875	-0.0788407	-0.022563	0.0753421	-0.0280967		0	0	0	0	0	0	0	0	0.609828	0.0419321	0.095863	0.0707694	0.486924	0.154146	0.68346	0.167887	0.913374	0.26036	0.344165	0.390721	0.815476	0.54736	0.907481	0.600444	SMED30008757	AsxlX1_comp81411_c1_seq1	AsxlX1	3999	smed010712	0	1	.	9	Q9H5I5	4e-123	Piezo-type mechanosensitive ion channel component 2	CDJ15629.1	0	protein piezo2 [Hymenolepis microstoma]
SMED30019275	0.0891536	0.0824898	-0.0331641	0.0976075	0.209903	0.105278	0.0507663	-0.067047	0.0891536		0	0	0	0	0	0	0	0	0.344188	0.38226	0.727577	0.302784	0.0257074	0.264309	0.595107	0.483449	0.80363	0.72454	0.897701	0.718737	0.218506	0.672125	0.868955	0.835622	SMED30019275	AsxlX1_comp81502_c3_seq23	AsxlX1	1810	rc_smed27097	0	1	.	0	Q9DE07	2e-33	Nibrin	XP_007231220.1	2e-34	nibrin [Astyanax mexicanus]
SMED30007202	-0.0537816	-0.147529	-0.00189773	-0.0876934	-0.0500358	0.0614584	-0.13345	0.0506151	-0.0537816		0	0	0	0	0	0	0	0	0.654323	0.221601	0.987339	0.467284	0.678452	0.607321	0.270382	0.671639	0.926664	0.578176	0.9961	0.829327	0.904158	0.877907	0.668867	0.911513	SMED30007202	Sxlembryo_comp100679_c0_seq1	Sxlembryo	3482	SMEDS2F2_0002354	0	2	.	2	P18293	0	Atrial natriuretic peptide receptor 1	CCD75732.1	0	protein kinase [Schistosoma mansoni]
SMED30018710	0.182545	0.300502	0.0875765	0.204418	0.298868	0.296336	0.165186	0.205129	0.182545		0	0	0	0	0	0	0	0	0.171345	0.0232672	0.513303	0.126222	0.0250989	0.025432	0.218695	0.12311	0.673035	0.188785	0.779113	0.515762	0.215345	0.240319	0.618323	0.53513	SMED30018710	Sxlembryo_comp100069_c0_seq1	Sxlembryo	3501	smed009425	2	2	.	0	Q6PUA2	2e-09	Transcription initiation factor TFIID subunit 1b	XP_003373355.1	2e-09	putative bromodomain protein [Trichinella spiralis]
SMED30024523	-0.640872	0.0998571	0.46604	-0.416629	0.0681576	-0.621475	0.279819	-0.672006	-0.640872		0	0	0	0	0	0	0	0	0.32265	0.862513	0.389981	0.509034	0.908027	0.33798	0.62209	0.29933	0.791645	0.957137	0.693005	0.852224	0.977301	0.732176	0.881553	0.726986	SMED30024523	Sxlembryo_comp143616_c0_seq1	Sxlembryo	680	smed019802	5	1	.	5	.	.	.	CDJ14224.1	1e-05	Platyhelminth-specific Rhodopsin-like Orphan Family 1 G protein-coupled receptor [Hymenolepis microstoma]
SMED30018515	0.0199599	0.0991934	0.183448	-0.0236635	0.0571429	-0.0102609	0.125518	-0.00569515	0.0199599		0	0	0	0	0	0	0	0	0.7802	0.164101	0.00961322	0.742133	0.426228	0.88623	0.0789277	0.936563	0.96505	0.50778	0.0838218	0.935409	0.775721	0.973352	0.394455	0.985848	SMED30018515	AsxlX1_comp75818_c1_seq4	AsxlX1	755	sm_710034	5	1	YES	0	.	.	.	.	.	.
SMED30006189	0.0199196	0.0937833	0.235033	-0.404518	0.571841	0.343565	0.343417	0.0575143	0.0199196		0	0	0	0	0	0	0	0	0.962298	0.821929	0.560405	0.37701	0.142139	0.390405	0.395475	0.890163	0.994946	0.943187	0.812789	0.777426	0.500771	0.767836	0.762073	0.975243	SMED30006189	uniq_SMEDS2F2_00021817-RA_1_225	033226_uniq	225	SMEDS2F2_0002181	0	1	.	0	.	.	.	.	.	.
SMED30000733	-1.15079	-0.853525	-1.54063	0.48191	0.528158	-0.84083	-1.08052	-0.260003	-1.15079		0	0	0	0	0	0	0	0	0.118035	0.224106	0.0480865	0.393659	0.350197	0.231417	0.144191	0.680434	0.603799	0.58049	0.235778	0.784612	0.724149	0.63695	0.521171	0.915397	SMED30000733	Sxlembryo_comp66741_c0_seq1	Sxlembryo	388	NA	NA	1	.	0	Q86UP8	7e-25	General transcription factor II-I repeat domain-containing protein 2A	XP_007060411.1	2e-32	general transcription factor II-I repeat domain-containing protein 2-like [Chelonia mydas]
SMED30033699	-0.0814074	-0.11057	-0.20124	-0.0518081	-0.145116	-0.0473204	-0.0951577	-0.0187087	-0.0814074		0	0	0	0	0	0	0	0	0.280894	0.143357	0.00781166	0.492842	0.0554855	0.530694	0.2084	0.803974	0.765845	0.476928	0.0734003	0.843238	0.324519	0.846173	0.606158	0.955095	SMED30033699	OX_Smed_1.0.04059	Oxford	5018	SMEDS2F2_0000689	2	3	.	0	Q6PB44	4e-78	Tyrosine-protein phosphatase non-receptor type 23 [Mus musculus]	XP_002434254.1	3e-91	tyrosine protein phosphatase non-receptor type, putative [Ixodes scapularis]
SMED30030100	-1.08081	-1.55976	-0.746257	-0.141964	-0.0975448	0.381365	-1.01301	-0.45458	-1.08081		0	0	0	0	0	0	0	0	0.195077	0.0837162	0.341934	0.844242	0.892814	0.562828	0.227186	0.5441	0.692737	0.37103	0.652489	0.962223	0.97341	0.861845	0.626806	0.865244	SMED30030100	Sxlregen_comp27993_c0_seq1	Sxlregen	306	NA	NA	1	.	0	.	.	.	.	.	.
SMED30031651	-0.211474	-0.271185	-0.184439	-0.185495	-0.0960977	0.016125	-0.0123412	-0.124591	-0.211474		0	0	0	0	0	0	0	0	0.0226755	0.00367202	0.0456941	0.0461808	0.300067	0.859701	0.89314	0.175626	0.333341	0.0595533	0.229281	0.314603	0.681776	0.9661	0.973829	0.610901	SMED30031651	SxlWT_comp53141_c0_seq2	SxlWT	1862	SMEDS2F2_0001133	0	2	.	12	Q8NBI5	1e-28	Solute carrier family 43 member 3	CDJ16065.1	3e-38	solute carrier family 43 [Echinococcus granulosus]
SMED30002173	-0.517523	-0.39839	-0.288473	-0.278973	-0.317446	-0.439219	-0.0417235	-0.046871	-0.517523		0	0	0	0	0	0	0	0	0.0649842	0.148914	0.285155	0.307107	0.250971	0.114423	0.874935	0.857551	0.506199	0.485411	0.598604	0.722984	0.633995	0.48471	0.968867	0.966713	SMED30002173	uniq_sm_468045	033226_uniq	358	sm_468045	0	.	.	.	.	.	.	.	.	.
SMED30032635	-0.0725485	-0.0694638	-0.0173969	0.0157579	-0.0231507	-0.0713267	-0.0203166	-0.0147412	-0.0725485		0	0	0	0	0	0	0	0	0.124307	0.14126	0.710725	0.737932	0.625374	0.13134	0.667541	0.753422	0.612776	0.473775	0.889807	0.933434	0.881944	0.511009	0.900785	0.940476	SMED30032635	AsxlWT_comp58380_c1_seq1	AsxlWT	2854	SMEDS2F2_0001479	18	1	.	0	A6H779	4e-18	F-box/LRR-repeat protein 2	CAX72743.1	1e-78	putative leucine-rich repeats containing F-box protein FBL3 [Schistosoma japonicum]
SMED30020473	-0.0610659	-0.814928	0.350465	-0.0891465	-0.86151	-0.115209	-0.22559	-0.516219	-0.0610659		0	0	0	0	0	0	0	0	0.888645	0.101429	0.385494	0.840281	0.0916725	0.794398	0.620469	0.271187	0.981429	0.405415	0.689285	0.962064	0.411252	0.948013	0.880831	0.706199	SMED30020473	Sxlregen_comp27494_c0_seq1	Sxlregen	678	NA	NA	1	.	0	.	.	.	.	.	.
SMED30014062	-0.0281983	-0.0702478	-0.0015631	-0.0154417	0.0023719	0.0653999	-0.0491166	-0.00586624	-0.0281983		0	0	0	0	0	0	0	0	0.717738	0.368516	0.983985	0.843262	0.975794	0.400872	0.530129	0.939979	0.950712	0.713925	0.995458	0.962223	0.995383	0.77572	0.83685	0.986212	SMED30014062	AsxlX1_comp77843_c0_seq1	AsxlX1	1591	SMEDS2F2_0000818	7	2	YES	0	P05307	4e-51	Protein disulfide-isomerase	ELU15730.1	2e-54	hypothetical protein CAPTEDRAFT_156715 [Capitella teleta]
SMED30035000	-0.0613508	-0.294551	-0.0202572	0.193769	-0.499588	0.0327768	0.087936	-0.0899232	-0.0613508		0	0	0	0	0	0	0	0	0.889625	0.522387	0.963003	0.650169	0.30295	0.94018	0.840609	0.838763	0.981429	0.812007	0.987952	0.903645	0.684906	0.986658	0.958204	0.962557	SMED30035000	uniq_smed28362	033226_uniq	598	smed28362	0	.	.	.	.	.	.	.	.	.
SMED30030469	0.432102	0.388924	0.408213	0.435319	0.212524	0.697662	0.68614	0.509641	0.432102		0	0	0	0	0	1	1	0	0.0507148	0.0800963	0.064588	0.0502276	0.35479	0.00118635	0.00155562	0.0197041	0.465094	0.362735	0.278391	0.328593	0.726495	0.0402432	0.0421872	0.227427	SMED30030469	Sxlregen_comp31179_c0_seq1	Sxlregen	1466	rc_smed008156	12	1	.	4	A8WVX4	1e-11	Innexin-19	BAE78816.1	2e-24	innexin8 [Dugesia japonica]
SMED30001999	0.389473	0.432291	0.359402	0.401456	0.049807	-0.215616	0.0356752	-0.37326	0.389473		0	0	0	0	0	0	0	0	0.242572	0.192252	0.280828	0.231128	0.889245	0.559398	0.920595	0.320507	0.738811	0.544813	0.594634	0.652369	0.972607	0.860523	0.981205	0.741575	SMED30001999	berlin_isotig06903	Berlin	695	smed27733	0	.	.	.	.	.	.	.	.	.
SMED30013694	-0.00718773	0.0614595	0.0777354	0.0330832	0.0263467	0.0127059	0.0332696	0.0152255	-0.00718773		0	0	0	0	0	0	0	0	0.906751	0.314152	0.20088	0.590232	0.669718	0.835992	0.588953	0.803331	0.984266	0.669806	0.50816	0.880262	0.901131	0.960188	0.865726	0.955095	SMED30013694	AsxlWT_comp48675_c0_seq1	AsxlWT	1275	SMEDS2F2_0002021	3	1	.	0	Q9D7H3	9e-82	RNA 3'-terminal phosphate cyclase	XP_971161.1	1e-83	RNA 3'-terminal phosphate cyclase [Tribolium castaneum]
SMED30025740	0.307696	-0.455009	-0.188177	-0.4166	0.298167	-0.44187	-0.38865	-0.329499	0.307696		0	0	0	0	0	0	0	0	0.564841	0.455246	0.744767	0.494834	0.584271	0.468597	0.524685	0.578018	0.904863	0.767537	0.904951	0.843976	0.862907	0.811108	0.833925	0.880087	SMED30025740	SxlWT_comp61538_c0_seq1	SxlWT	1911	NA	NA	2	YES	11	Q9JHI4	8e-72	Solute carrier family 13 member 1	XP_008064902.1	2e-74	solute carrier family 13 member 2 [Tarsius syrichta]
SMED30012028	0.00342669	-0.0624409	-0.235238	-0.136185	0.0595714	-0.0484967	-0.18188	-0.150974	0.00342669		0	0	0	0	0	0	0	0	0.981443	0.675715	0.123484	0.371513	0.688385	0.745293	0.23913	0.316009	0.998297	0.886358	0.39562	0.774606	0.906364	0.930679	0.640622	0.737699	SMED30012028	uniq_sm_rc_511629	033226_uniq	669	sm_rc_511629	0	.	.	.	.	.	.	.	.	.
SMED30026736	0.131851	0.274337	0.27143	0.40188	0.0684111	0.251335	0.103813	0.0305425	0.131851		0	0	0	0	0	0	0	0	0.0278757	4.46345e-06	5.5097e-06	1.69183e-11	0.256089	2.6586e-05	0.0842041	0.611205	0.361225	0.000303849	0.000291723	3.57678e-09	0.639167	0.00256285	0.406674	0.888758	SMED30026736	AsxlWT_comp21767_c0_seq1	AsxlWT	1247	SMEDS2F2_0002065	0	1	.	0	Q7ZV22	8e-98	S-methyl-5'-thioadenosine phosphorylase	XP_008314904.1	3e-98	S-methyl-5'-thioadenosine phosphorylase [Cynoglossus semilaevis]
SMED30024206	-0.0350236	-0.0699578	0.00424574	0.0288629	-0.0754066	-0.0118595	-0.0755264	0.0337567	-0.0350236		0	0	0	0	0	0	0	0	0.754589	0.534346	0.969565	0.796642	0.507565	0.915694	0.50605	0.760988	0.958798	0.817346	0.98991	0.948996	0.825556	0.981771	0.825868	0.942493	SMED30024206	Sxlembryo_comp97385_c0_seq16	Sxlembryo	4637	SMEDS2F2_0001757	0	1	.	1	Q6KEQ9	4e-93	Protocadherin-11 X-linked	EKC23595.1	6e-98	Protocadherin-9 [Crassostrea gigas]
SMED30014908	0.044121	0.0366905	0.089306	0.04598	0.0334279	-0.0503616	0.0554472	-0.0488699	0.044121		0	0	0	0	0	0	0	0	0.493089	0.56911	0.163558	0.476409	0.606145	0.436957	0.390771	0.449507	0.875557	0.83607	0.458552	0.834768	0.872175	0.79386	0.759326	0.822276	SMED30014908	Sxlregen_comp5406_c0_seq1	Sxlregen	3535	SMEDS2F2_0001568	1	3	YES	21	Q5F4B8	4e-33	Solute carrier family 46 member 3	XP_005017509.1	8e-33	solute carrier family 46 member 3 isoform X1 [Anas platyrhynchos]
SMED30031927	-0.254009	-0.132135	-0.293028	-0.363832	-0.100223	-0.318798	-0.258382	-0.0513584	-0.254009		0	0	0	0	0	0	0	0	0.0216343	0.225418	0.00810166	0.00128813	0.361891	0.00437511	0.020916	0.632558	0.326089	0.58173	0.075277	0.0292247	0.731773	0.0891685	0.205673	0.896089	SMED30031927	uniq_SMEDS2F2_00026305-RA_1_1151	033226_uniq	1151	SMEDS2F2_0002630	0	1	.	0	.	.	.	.	.	.
SMED30018714	0.203363	0.178017	0.137104	0.204861	0.200098	0.07077	0.244593	0.205471	0.203363		0	0	0	0	0	0	0	0	0.0495157	0.0868249	0.187136	0.0491836	0.0564399	0.501751	0.0186677	0.0465849	0.462165	0.378312	0.491214	0.326235	0.327417	0.830452	0.193784	0.352096	SMED30018714	AsxlWT_comp57907_c0_seq16	AsxlWT	1125	SMEDS2F2_0000294	4	1	.	1	Q8N3Y7	3e-49	Epidermal retinol dehydrogenase 2	CDQ68630.1	2e-54	unnamed protein product [Oncorhynchus mykiss]
SMED30013571	-0.0560858	-0.150256	0.827183	-0.240291	-0.918891	-0.255753	0.203654	0.0207527	-0.0560858		0	0	0	0	0	0	0	0	0.925184	0.804248	0.127091	0.696854	0.176812	0.677759	0.728838	0.972616	0.988521	0.937699	0.402001	0.920925	0.550973	0.907498	0.922929	0.993701	SMED30013571	mito_ND4L	unknown	276	sm_rc_35465	4	.	.	.	.	.	.	YP_008592438.1	4e-12	NADH dehydrogenase subunit 4L (mitochondrion) [Schmidtea mediterranea]
SMED30001194	0.509257	-0.352645	0.0359039	0.61201	0.367935	-0.338984	-0.187946	0.0389992	0.509257		0	0	0	0	0	0	0	0	0.220361	0.464491	0.936101	0.137309	0.395569	0.482126	0.692381	0.930618	0.718927	0.774349	0.979104	0.535507	0.754183	0.81857	0.910335	0.984069	SMED30001194	AsxlX1_comp83171_c0_seq3	AsxlX1	596	NA	NA	1	.	0	.	.	.	XP_003094935.1	2e-10	hypothetical protein CRE_29157 [Caenorhabditis remanei]
SMED30013328	0.249442	0.0513477	0.226988	0.251842	0.0414731	0.186852	0.346178	0.301088	0.249442		0	0	0	0	0	0	0	0	0.12781	0.762455	0.165096	0.127399	0.810583	0.261175	0.0340645	0.0622756	0.615709	0.922791	0.461013	0.517927	0.947917	0.668206	0.26353	0.403099	SMED30013328	uniq_sm_257933	033226_uniq	573	sm_257933	0	.	.	.	.	.	.	.	.	.
SMED30023040	0.0367068	0.0772749	0.183421	0.0853324	-0.564142	-0.518812	-0.0581106	-0.0249085	0.0367068		0	0	0	0	0	0	0	0	0.923126	0.838474	0.623138	0.821582	0.169872	0.200574	0.880691	0.947891	0.98791	0.94933	0.845028	0.955906	0.54208	0.603288	0.971	0.987474	SMED30023040	AsxlX1_comp17487_c0_seq1	AsxlX1	1021	smed012674	0	1	.	7	Q9NDM2	7e-08	Protein trapped in endoderm-1 [Drosophila melanogaster]	ELT95008.1	9e-37	hypothetical protein CAPTEDRAFT_188859 [Capitella teleta]
SMED30021429	-0.433731	0.350761	0.0180186	-0.0681515	0.555701	0.560204	0.730348	0.328232	-0.433731		0	0	0	0	0	0	0	0	0.430186	0.475087	0.971836	0.896589	0.249804	0.241913	0.121434	0.504262	0.851646	0.782958	0.990764	0.973593	0.633177	0.650002	0.48031	0.846445	SMED30021429	uniq_sm_rc_501377	033226_uniq	442	sm_rc_501377	0	.	.	.	.	.	.	.	.	.
SMED30023245	-0.251368	-0.350649	-0.669966	-0.772112	-0.32261	-0.366317	-0.282076	-0.112566	-0.251368		0	0	0	0	0	0	0	0	0.362292	0.211244	0.0219191	0.0103763	0.255058	0.193505	0.315069	0.675679	0.814556	0.566582	0.145074	0.131216	0.638176	0.594386	0.709441	0.913495	SMED30023245	AsxlX1_comp78527_c0_seq16	AsxlX1	1511	NA	NA	1	.	0	P10394	2e-13	Retrovirus-related Pol polyprotein from transposon 412	CCD60053.1	1e-43	hypothetical protein Smp_194000 [Schistosoma mansoni]
SMED30003744	-0.275498	-0.0414538	-0.307001	-0.0676499	0.0855505	-0.268556	0.0925186	0.0346699	-0.275498		0	0	0	0	0	0	0	0	0.154061	0.82343	0.112039	0.719077	0.643232	0.166	0.614771	0.848971	0.653617	0.944131	0.3751	0.928085	0.890449	0.561964	0.879014	0.965123	SMED30003744	berlin_isotig00604	Berlin	1181	isotig00604	0	1	.	0	.	.	.	.	.	.
SMED30028769	-0.22081	-0.144645	-0.0981265	-0.0953524	0.230643	0.160048	0.187953	0.330759	-0.22081		0	0	0	0	0	0	0	0	0.0127342	0.098826	0.255629	0.276112	0.00576557	0.0550371	0.0250021	3.85646e-05	0.258831	0.401768	0.569094	0.699449	0.0943259	0.353679	0.223951	0.0031982	SMED30028769	berlin_CUFF.220529.2	Berlin	319	NA	NA	1	.	0	.	.	.	.	.	.
SMED30032244	-0.094732	0.40773	0.277901	0.50831	-0.0767297	0.267528	0.256509	0.0441812	-0.094732		0	0	0	0	0	0	0	0	0.7989	0.241623	0.430203	0.141563	0.838551	0.451569	0.474616	0.903455	0.968638	0.599859	0.724562	0.540168	0.955934	0.802733	0.811415	0.977227	SMED30032244	Sxlembryo_comp101369_c0_seq2	Sxlembryo	4491	NA	NA	4	.	0	.	.	.	NP_476526.1	9e-28	Rep [Planaria asexual strain-specific virus-like element type 1]
[truncated: 29,046 more rows]
