# Supplementary material for: Pathogenic shifts in endogenous microbiota impede tissue regeneration via distinct activation of TAK1/MKK/p38
Source: eLife. 2016 Jul 21;5:e16793. doi: 10.7554/eLife.16793 (PMC4993586; doi:10.7554/eLife.16793)
Supplement: Figure 5—source data 1. — DOI: http://dx.doi.org/10.7554/eLife.16793.015 [file elife-16793-fig5-data1.xls]

## Sheet: Sheet1
Figure 5-source data 1
Predicted Function	Gene Name	qseqid	ce.sseqid	ce.evalue	ce.desc	dm.sseqid	dm.evalue	dm.desc	hs.sseqid	hs.evalue	hs.desc	mm.sseqid	mm.evalue	mm.desc	nr.sseqid	nr.evalue	nr.desc	smed.sseqid	smed.evalue	smed.desc	sp.sseqid	sp.evalue	sp.desc
Activators	bcl3-1	SMED30023862	T28D6.4	7.27e-05	T28D6.4 (T28D6.4)	FBpp0084688	4.98e-06	NA	ENSP00000393731	2.13e-07	B-cell CLL/lymphoma 3	ENSMUSP00000113851	2.04e-07	B cell leukemia/lymphoma 3	AFJ24844.1	1.07e-35	BCL3-1, partial [Schmidtea mediterranea]	AY068890.1	0	clone H.22.1f	IKBA_CHICK	4.54e-08	NF-kappa-B inhibitor alpha
	ecsit	SMED30024207	Y17G9B.5	2.62e-39	Y17G9B.5 (Y17G9B.5)	FBpp0078296	3.47e-58	ECSIT	ENSP00000270517	6.72e-43	ECSIT signalling integrator	ENSMUSP00000096537	5.78e-44	ECSIT signalling integrator	ELU08340.1	1.36e-66	hypothetical protein CAPTEDRAFT_163254 [Capitella teleta]	AY068019.1	4.89e-157	clone H.59.12b	ECSIT_DROME	2.99e-57	Evolutionarily conserved signaling intermediate in Toll pathway, mitochondrial
	hep	SMED30025593	K08A8.1a	4.22e-88	MEK-1, isoform b (mek-1)	FBpp0303423	3.9e-94	hemipterous	ENSP00000381066	9.53e-101	mitogen-activated protein kinase kinase 7	ENSMUSP00000106622	4.95e-102	mitogen-activated protein kinase kinase 7	AIP89945.1	0	hemipterous [Schmidtea mediterranea]	KM095500.1	0	hemipterous	MP2K7_RAT	2.88e-100	Dual specificity mitogen-activated protein kinase kinase 7
	jnk	SMED30034763	B0478.1b.2	1.34e-178	JNK-1, isoform a (jnk-1)	FBpp0079676	0	basket	ENSP00000378595	0	mitogen-activated protein kinase 10	ENSMUSP00000084065	0	mitogen-activated protein kinase 10	AIP89944.1	0	c-Jun N-terminal kinases [Schmidtea mediterranea]	KM095499.1	0	c-Jun N-terminal kinases	JNK_DROME	0	Stress-activated protein kinase JNK
	jun D	SMED30006731	T24H10.7e	7.03e-08	JUN-1, isoform a.	FBpp0087499	7.06e-13	Jun-related antigen	ENSP00000475153	7.14e-12	jun D proto-oncogene	ENSMUSP00000092901	5.42e-12	jun D proto-oncogene	XP_009172161.1	6.79e-13	hypothetical protein T265_08172 [Opisthorchis viverrini]	AY067975.1	0	clone H.48.11a	JUNB_CYPCA	1.62e-12	Transcription factor jun-B [Cyprinus carpio]
	mkk4	SMED30017074	R03G5.2.2	1.98e-103	SEK-1 (sek-1)	FBpp0081378	1.37e-128	MAP kinase kinase 4	ENSP00000262445	5.03e-147	mitogen-activated protein kinase kinase 4	ENSMUSP00000041282	1.33e-147	mitogen-activated protein kinase kinase 4	XP_010890023.1	3.55e-147	dual specificity mitogen-activated protein kinase kinase 4 isoform X5 [Esox lucius]	NA	NA	NA	MP2K4_MOUSE	9.14e-147	Dual specificity mitogen-activated protein kinase kinase 4
	mkk6-1	SMED30004633	R03G5.2.2	1.16e-86	SEK-1 (sek-1)	FBpp0073551	2.95e-91	licorne	ENSP00000468348	4.51e-103	mitogen-activated protein kinase kinase 6	ENSMUSP00000020949	1.28e-102	mitogen-activated protein kinase kinase 6	XP_972852.1	9.43e-106	dual specificity mitogen-activated protein kinase kinase 6 [Tribolium castaneum]	AY066106.1	0	clone H.83.6h	MP2K6_BOVIN	1.02e-102	Dual specificity mitogen-activated protein kinase kinase 6
	mkk6-2	SMED30017135	R03G5.2.2	6.82e-82	SEK-1 (sek-1)	FBpp0073551	1.28e-82	licorne	ENSP00000468348	3.7e-91	mitogen-activated protein kinase kinase 6	ENSMUSP00000020949	9.94e-91	mitogen-activated protein kinase kinase 6	AEW27101.1	7.38e-98	EgMKK1 [Echinococcus granulosus]	NA	NA	NA	MP2K6_HUMAN	1.66e-90	Dual specificity mitogen-activated protein kinase kinase 6
	p38-1	SMED30021209	B0218.3	7e-143	PMK-1 (pmk-1)	FBpp0080111	3.17e-142	p38b MAP kinase	ENSP00000229794	6.06e-150	mitogen-activated protein kinase 14	ENSMUSP00000086204	1.74e-151	mitogen-activated protein kinase 11	GAA55102.1	2.09e-151	p38 MAP kinase [Clonorchis sinensis]	AY066126.1	0	clone H.26.1c	MK11_MOUSE	1.19e-150	Mitogen-activated protein kinase 11
	p38-2	SMED30024187	B0218.3	6.22e-102	PMK-1 (pmk-1)	FBpp0080111	1.93e-109	p38b MAP kinase	ENSP00000229794	5.33e-111	mitogen-activated protein kinase 14	ENSMUSP00000061958	2.4e-110	mitogen-activated protein kinase 14	GAA55102.1	2.41e-112	p38 MAP kinase [Clonorchis sinensis]	NA	NA	NA	MK14_XENLA	1.91e-112	Mitogen-activated protein kinase 14
	pgrp-1	SMED30028883	NA	NA	NA	FBpp0076167	1.91e-14	Peptidoglycan recognition protein LF	ENSP00000357728	1.65e-10	peptidoglycan recognition protein 4	ENSMUSP00000110099	1.27e-14	peptidoglycan recognition protein 2	AFJ24867.1	0	peptidoglycan recognition protein-1 [Schmidtea mediterranea]	JX010624.1	0	clone Smed_27198_V2 peptidoglycan recognition protein-1	PGRP2_MOUSE	8.76e-14	N-acetylmuramoyl-L-alanine amidase
	pgrp-2	SMED30031777	NA	NA	NA	FBpp0289519	3.46e-20	Peptidoglycan recognition protein LC	ENSP00000008938	3.63e-16	peptidoglycan recognition protein 1	ENSMUSP00000035737	2.25e-15	peptidoglycan recognition protein 3	AFJ24867.1	1.21e-43	peptidoglycan recognition protein-1 [Schmidtea mediterranea]	NA	NA	NA	PGPLF_DROME	2.56e-16	Peptidoglycan-recognition protein LF
	pgrp-3	SMED30034096	NA	NA	NA	FBpp0076519	7.7e-14	PGRP-SD	ENSP00000290722	4.13e-13	peptidoglycan recognition protein 3	ENSMUSP00000035737	1.92e-13	peptidoglycan recognition protein 3	AFJ24867.1	0	peptidoglycan recognition protein-1 [Schmidtea mediterranea]	AY066241.1	0	clone H.53.2b(T3)	PGPSD_DROME	6.65e-13	Peptidoglycan-recognition protein SD
	pgrp-4	SMED30024286	NA	NA	NA	FBpp0289519	6.09e-31	Peptidoglycan recognition protein LC	ENSP00000008938	7.78e-29	peptidoglycan recognition protein 1	ENSMUSP00000032573	5.61e-29	peptidoglycan recognition protein 1	XP_005314113.1	2.58e-34	peptidoglycan recognition protein 3, partial [Chrysemys picta bellii]	NA	NA	NA	PGRP_TRINI	7.94e-30	Peptidoglycan recognition protein
	pgrp-5	SMED30015256	NA	NA	NA	FBpp0081872	1.2e-50	Peptidoglycan recognition protein LB	ENSP00000345968	1.92e-48	peptidoglycan recognition protein 2	ENSMUSP00000110099	2.69e-44	peptidoglycan recognition protein 2	XP_009050887.1	5.1e-61	hypothetical protein LOTGIDRAFT_114633 [Lottia gigantea]	NA	NA	NA	PGPLB_DROME	1.04e-49	Peptidoglycan-recognition protein LB
	pgrp-6	SMED30017410	NA	NA	NA	FBpp0081872	6.85e-53	Peptidoglycan recognition protein LB	ENSP00000292609	8.78e-47	peptidoglycan recognition protein 2	ENSMUSP00000110099	5.21e-42	peptidoglycan recognition protein 2	XP_001849091.1	1.57e-58	peptidoglycan recognition protein sb2 [Culex quinquefasciatus]	AY066986.1	0	clone H.37.11h	PGPLB_DROME	5.91e-52	Peptidoglycan-recognition protein LB
	pgrp-7	SMED30026578	NA	NA	NA	FBpp0081872	1.6e-44	Peptidoglycan recognition protein LB	ENSP00000345968	1.47e-41	peptidoglycan recognition protein 2	ENSMUSP00000110099	6.7e-43	peptidoglycan recognition protein 2	NA	NA	NA	NA	NA	NA	PGPLB_DROME	1.38e-43	Peptidoglycan-recognition protein LB
	tab1-1	SMED30011258	C44H4.5	6.8e-09	TAP-1 (tap-1)	NA	NA	NA	ENSP00000216160	2.17e-15	TGF-beta activated kinase 1/MAP3K7 binding protein 1	ENSMUSP00000023050	3.74e-16	TGF-beta activated kinase 1/MAP3K7 binding protein 1	XP_001649578.1	4.9e-19	AAEL014763-PA [Aedes aegypti]	AY066262.1	0	clone H.44.11d(T3)	TAB1_MOUSE	2.57e-15	TGF-beta-activated kinase 1 and MAP3K7-binding protein 1
	tak1	SMED30014989	F52F12.3	2.95e-29	MOM-4 (mom-4)	FBpp0077011	2.32e-52	TGF-beta activated kinase 1	ENSP00000358333	4.48e-48	mitogen-activated protein kinase kinase kinase 7	ENSMUSP00000103818	3.11e-48	mitogen-activated protein kinase kinase kinase 7	KFM59726.1	1.28e-57	Mitogen-activated protein kinase kinase kinase 7, partial [Stegodyphus mimosarum]	NA	NA	NA	M3K7_DROME	2e-51	Mitogen-activated protein kinase kinase kinase 7
	traf2-1	SMED30026595	F45G2.6	1.58e-36	TRF-1 (trf-1)	FBpp0077119	1.35e-38	TNF-receptor-associated factor 4	ENSP00000247668	1.94e-69	TNF receptor associated factor 2	ENSMUSP00000028311	7.4e-73	TNF receptor-associated factor 2	ADF47429.1	0	TNF receptor-associated factor-2-like protein A [Dugesia japonica]	AY066959.1	0	clone H.28.6b	TRAF2_MOUSE	5.08e-72	TNF receptor-associated factor 2
	traf2-2	SMED30020607	F45G2.6	3.53e-29	TRF-1 (trf-1)	FBpp0077119	2.01e-32	TNF-receptor-associated factor 4	ENSP00000445998	1.46e-68	TNF receptor associated factor 3	ENSMUSP00000028311	1.32e-63	TNF receptor-associated factor 2	ADF47429.1	2.23e-104	TNF receptor-associated factor-2-like protein A [Dugesia japonica]	NA	NA	NA	TRAF2_HUMAN	2.33e-63	TNF receptor-associated factor 2
	traf5-1	SMED30012770-A	F45G2.6	7.47e-12	TRF-1 (trf-1)	FBpp0306504	1.55e-16	TNF-receptor-associated factor 4	ENSP00000336825	8.4e-21	TNF receptor associated factor 5	ENSMUSP00000141584	4.87e-21	TNF receptor-associated factor 5	XP_001627337.1	9.55e-25	predicted protein [Nematostella vectensis]	NA	NA	NA	TRAF5_HUMAN	3.78e-20	TNF receptor-associated factor 5
	traf6-1	SMED30021059	NA	NA	NA	FBpp0071136	4.97e-10	TNF-receptor-associated factor 6	ENSP00000337853	2.91e-10	TNF receptor associated factor 6	ENSMUSP00000004949	4.14e-10	TNF receptor-associated factor 6	AFJ24792.1	9.16e-26	TNF receptor associated factor-2, partial [Schmidtea mediterranea]	NA	NA	NA	TRAF6_MACMU	3.32e-10	TNF receptor-associated factor 6
	traf6-3	SMED30030173	NA	NA	NA	FBpp0071136	2.29e-10	TNF-receptor-associated factor 6	ENSP00000337853	0.000441	TNF receptor associated factor 6	ENSMUSP00000077584	0.000309	recombination activating gene 1	AFJ24792.1	6.98e-21	TNF receptor associated factor-2, partial [Schmidtea mediterranea]	NA	NA	NA	RAG1_XENLA	8.27e-05	V(D)J recombination-activating protein 1
	xiap	SMED30011545	F16A11.1b	5.4e-06	F16A11.1, isoform a.	FBpp0082849	1.57e-11	Deterin	ENSP00000395230	3.8e-28	X-linked inhibitor of apoptosis	ENSMUSP00000026978	9.22e-28	X-linked inhibitor of apoptosis	CDQ89724.1	5.53e-31	unnamed protein product [Oncorhynchus mykiss]	NA	NA	NA	XIAP_XENTR	2e-28	E3 ubiquitin-protein ligase XIAP
Inhibitors	cyld-1	SMED30027594	F40F12.5b	4.99e-33	CYLD-1, isoform a.	FBpp0079661	3.3e-41	cylindromatosis ortholog (H. sapiens)	ENSP00000456488	3.77e-49	cylindromatosis (turban tumor syndrome)	ENSMUSP00000105254	4.31e-48	cylindromatosis (turban tumor syndrome)	XP_005880369.1	2.88e-47	ubiquitin carboxyl-terminal hydrolase CYLD [Myotis brandtii]	NA	NA	NA	CYLD_HUMAN	8.37e-48	Ubiquitin carboxyl-terminal hydrolase CYLD
	pp6	SMED30008233	C34C12.3	7.11e-135	PPH-6 (pph-6)	FBpp0303847	2.11e-157	Protein phosphatase V	ENSP00000362648	1.02e-162	protein phosphatase 6, catalytic subunit	ENSMUSP00000028087	1.89e-163	protein phosphatase 6, catalytic subunit	XP_002154194.3	2.68e-164	serine/threonine-protein phosphatase 6 catalytic subunit-like [Hydra vulgaris]	NA	NA	NA	PPP6_MOUSE	1.3e-162	Serine/threonine-protein phosphatase 6 catalytic subunit
	ppm1a	SMED30033069	F25D1.1c.3	8.6e-89	PPM-1, isoform c.	FBpp0084399	6.3e-100	NA	ENSP00000378514	9.01e-136	protein phosphatase, Mg2+/Mn2+ dependent 1A	ENSMUSP00000021514	1.38e-133	protein phosphatase 1A, magnesium dependent, alpha isoform	NP_058734.1	3.42e-133	protein phosphatase 1A [Rattus norvegicus]	AY067964.1	0	clone H.43.6g	PPM1A_RAT	2.3e-135	Protein phosphatase 1A
	ppm1b	SMED30034219	F25D1.1c.3	2.17e-100	PPM-1, isoform c.	FBpp0084812	8.96e-124	alphabet	ENSP00000378514	9.63e-153	protein phosphatase, Mg2+/Mn2+ dependent 1A	ENSMUSP00000107924	1.52e-154	protein phosphatase 1B, magnesium dependent, beta isoform	GAA51813.1	1.63e-171	protein phosphatase 1B [Clonorchis sinensis]	AY066451.1	0	clone HB.3.10d	PPM1B_MOUSE	1.13e-153	Protein phosphatase 1B
	trabid	SMED30034215	Y50C1A.1a	5.43e-22	OTUB-2 (otub-2)	FBpp0081569	3.82e-138	trabid	ENSP00000352676	1.87e-135	zinc finger, RAN-binding domain containing 1	ENSMUSP00000033265	1.72e-135	zinc finger, RAN-binding domain containing 1	ELU04077.1	4.23e-149	hypothetical protein CAPTEDRAFT_178164 [Capitella teleta]	AY066092.1	0	clone H.43.2a	TRBID_DROME	3.3e-137	Ubiquitin thioesterase trabid
	traf3-1	SMED30002663	F45G2.6	2.51e-34	TRF-1 (trf-1)	FBpp0306504	5.19e-27	TNF-receptor-associated factor 4	ENSP00000376500	4.66e-51	TNF receptor associated factor 3	ENSMUSP00000021706	2.15e-51	TNF receptor-associated factor 3	ADF47430.1	1.8e-69	TNF receptor-associated factor-2-like protein B [Dugesia japonica]	JX010627.1	3.31e-135	clone Smed_19658_V2 TNF receptor associated factor-1	TRAF3_MOUSE	1.48e-50	TNF receptor-associated factor 3
	otud7b	SMED30029424	Y50C1A.1a	2.15e-57	OTUB-2 (otub-2)	FBpp0081569	5.26e-17	trabid	ENSP00000408231	1.82e-70	OTU deubiquitinase 7B	ENSMUSP00000046413	3.95e-68	OTU domain containing 7B	XP_013403493.1	3.09e-90	OTU domain-containing protein 7B-like isoform X1 [Lingula anatina]	AY066079.1	0	clone H.96.7f(T3)	OTU7B_HUMAN	2.43e-68	OTU domain-containing protein 7B
Other	bcl2-1	SMED30030127	NA	NA	NA	FBpp0087182	0.000159	Buffy	ENSP00000302564	6.27e-07	BCL2-like 1	ENSMUSP00000105445	6.15e-07	BCL2-like 1	ACW83059.1	2.07e-131	bcl2-like protein [Schmidtea mediterranea]	FJ807655.1	0	strain CIW4 bcl2-like protein (bcl2-1)	AR11_XENLA	7.99e-12	Apoptosis regulator R11
	bcl2-2	SMED30017688	NA	NA	NA	FBpp0085443	2.68e-06	Death executioner Bcl-2 homologue	ENSP00000390760	2.58e-15	BCL2-like 1	ENSMUSP00000117716	1.45e-15	BCL2-like 1	AEX93481.1	7.24e-139	bcl2-2 [Schmidtea mediterranea]	JN621815.1	0	bcl2-2	B2CL1_PIG	7.67e-15	Bcl-2-like protein 1
	tehao	SMED30003154	NA	NA	NA	FBpp0080080	2.16e-08	Tehao	NA	NA	NA	NA	NA	NA	ELT94635.1	6.07e-50	hypothetical protein CAPTEDRAFT_225872 [Capitella teleta]	NA	NA	NA	TOLL_DROME	2.57e-06	Protein toll
