# Supplementary material for: Pathogenic shifts in endogenous microbiota impede tissue regeneration via distinct activation of TAK1/MKK/p38
Source: eLife. 2016 Jul 21;5:e16793. doi: 10.7554/eLife.16793 (PMC4993586; doi:10.7554/eLife.16793)
Supplement: Figure 6—source data 1. — DOI: http://dx.doi.org/10.7554/eLife.16793.018 [file elife-16793-fig6-data1.xls]

## Sheet: Figure 6-source data 1
Days	unc + unc																														mkk6-1 +unc
0	0	0	0	0	0	0	0	0	0	0	0	0	0	0	0	0	0	0	0	0	0	0	0	0	0	0	0	0	0		0	0	0	0	0	0	0	0	0	0	0	0	0	0	0	0
2	0	0	0	0	0	0	0	0	0	0	0	0	0	0	0	0	0	0	0	0	0	0	0	0	0	0	0	0	0		0	0	0	0	0	0	0	0	0	0	0	0	0	0	0	0
3	0	0	0	0	0	0	0	0	0	0	0	0	0	0	0	0	0	0	0	0	0	0	0	0	0	0	0	0	0		0	0	0	0	0	0	0	0	0	0	0	0	0	0	0	0
4	2	0	0	0	0	0	0	0	0	0	0	0	0	0	0	0	0	0	0	0	0	0	0	0	0	0	0	0	0		0	0	0	0	0	0	0	0	0	0	0	0	0	0	0	0
5	2	0	0	0	0	0	0	0	0	0	0	0	0	0	0	0	0	0	0	0	0	0	0	0	0	0	0	0	0		0	0	0	0	0	0	0	0	0	0	0	0	0	0	0	0
6	3	0	0	0	0	0	0	0	0	0	0	0	0	0	0	0	0	0	0	0	2	0	0	0	0	0	0	0	0		0	0	0	0	0	0	0	0	0	0	0	0	0	0	0	0
7	3	0	0	0	0	0	0	0	0	0	0	0	0	0	0	0	0	0	0	0	3	0	0	0	0	2	0	0	0		0	0	0	0	0	0	0	0	0	0	0	0	0	0	0	0
9	3	0	0	0	0	0	0	0	0	0	0	0	0	0	0	0	0	0	0	0	3	2	0	0	0	3	0	0	0		0	0	0	0	0	0	0	0	0	0	0	0	0	0	0	0
11	3	0	0	0	0	3	2	0	0	0	3	3	2	0	0	2	2	0	0	0	3	3	2	0	0	3	0	0	0		0	0	0	0	0	0	0	0	0	0	0	0	0	0	0	0
12	3	2	2	0	0	3	3	3	0	0	3	3	2	0	0	3	3	2	2	0	3	3	3	2	2	3	2	0	0		0	0	0	0	0	0	0	0	0	0	0	0	0	0	0	0
